# Supplementary material for: A lipidome landscape of aging in mice
Source: Research Square preprint supplement (doi:10.21203/rs.3.rs-2139359/v1), 2022-10-26
Supplement: Supplementary file 1 [file 21bba934abd04667b0e79f48.docx]

**Supplementary information**

**A lipidome landscape of aging in mice**

Hiroshi Tsugawa1,2,3,4, Tomoaki Ishihara1, Kota Ogasa5, Seigo Iwanami5, Aya Hori1, Mikiko Takahashi3, Yutaka Yamada3, Aki Minoda1,6, Makoto Arita1,4,5

1. RIKEN Center for Integrative Medical Sciences, 1-7-22 Suehiro-cho, Tsurumi-ku, Yokohama, Kanagawa 230-0045, Japan
2. Department of Biotechnology and Life Science, Tokyo University of Agriculture and Technology, 2-24-16 Nakamachi, Koganei-shi, Tokyo 184-8588, Japan
3. RIKEN Center for Sustainable Resource Science, 1-7-22 Suehiro-cho, Tsurumi-ku, Yokohama, Kanagawa 230-0045, Japan
4. Molecular and Cellular Epigenetics Laboratory, Graduate School of Medical life Science, Yokohama City University, Tsurumi-ku, Yokohama, Kanagawa 230-0045, Japan
5. Division of Physiological Chemistry and Metabolism, Graduate School of Pharmaceutical Sciences, Keio University, 1-5-30 Shibakoen, Minato-ku, Tokyo 105-8512, Japan
6. Department of Cell Biology, Radboud Institute for Molecular Life Sciences, Radboud University Nijmegen, Nijmegen, The Netherlands

Corresponding authors

Hiroshi Tsugawa: [htsugawa@go.tuat.ac.jp](mailto:htsugawa@go.tuat.ac.jp)

Makoto Arita: makoto.arita@riken.jp

**Contents**

Supplementary Figure 1

Supplementary Table 1-6

Supplementary Data 1 and 2

Source data

**Supplementary Figures**

**Figure S1. Loading plot of principal component analysis.** The top 30 positive- and negative loading values of first principal component (PC1) are described in each tissue. The number after the lipid metabolite name is the alignment ID obtained from MS-DIAL 4.

**Supplementary Tables**

Table S1. Sample information used in this study

Table S2. The detail of sample-, injection-, and solvent volumes for LC-MS/MS analysis

Table S3. Information of lipid internal standards

Table S4: Lipid subclass and the brief summary of annotation rule to characterize lipid molecules

Table S5. MS-DIAL parameters for (a) positive ion mode data and (b) negative ion mode data

Table S6. The detail of adduct form used for lipid quantification

**Supplementary Data**

Supplementary Data 1. The lipidome result of biological samples

Supplementary Data 2. The kidney transcriptome result

**Source Data**

Source Data contains the source information for all figures.
