# Supplementary material for: A lipidome landscape of aging in mice
Source: Research Square preprint supplement (doi:10.21203/rs.3.rs-2139359/v1), 2022-10-26
Supplement: Supplementary file 2 [file 3ec066363d6a3d7850a4e575.xlsx]

## Sheet: Table S1
	Table S1. Sample information used in this study
	Sample category	Sample name	2 months	12 months	19 months	24 months
	Mouse	Ear skin	○		○	○
	Mouse	Kidney	○	○	○	○
	Mouse	Liver	○	○	○	○
	Mouse	Lung	○	○	○	○
	Mouse	Mesentery	○	○	○	○
	Mouse	Muscle	○	○	○	○
	Mouse	Plasma	○		○	○
	Mouse	Back skin	○		○	○
	Mouse	Spleen	○	○	○	○
	Mouse	Feces	○			○
	Mouse	Bone marrow	○		○	○
	Mouse	Small intestine	○		○	○
	Mouse	Large intestine	○		○	○
	The circle symbol means that the tissue was obtained at the time point.
	At the same time point, four types of mice including male/SPF, male/GF, female/SPF, and female/GF were harvested with three biological replicates (n=3).

## Sheet: Table S2
	Table S2. The detail of sample-, injection, and solvent volumes for LC-MS/MS analysis
	Sample category	Sample name	Injection mL (pos)	Injection mL (neg)	Sample volume in LC-MS vial	Solvent volume in LC-MS vial
	Mouse	Ear	1	3	1.5 mg	320 mL
	Mouse	Kidney	1	3	5 mg	320 mL
	Mouse	Liver	0.5	2	5 mg	320 mL
	Mouse	Lung	1	3	5 mg	320 mL
	Mouse	Mesentery	0.5	3	2 mg	320 mL
	Mouse	Muscle	0.4	1.2	5 mg	320 mL
	Mouse	Plasma	1	3	20 mL	320 mL
	Mouse	Skin	1	3	2 mg	320 mL
	Mouse	Spleen	1	3	5 mg	320 mL
	Mouse	Feces	2	2	5 mg	320 mL
	Mouse	Bone marrow	1	1	10^6 cells	320 mL
	Mouse	Small intestine	1	1	5 mg	320 mL
	Mouse	Large intestine	1	1	5 mg	320 mL

## Sheet: Table S3
	Table S3. Information of internal standards
	Name	mM in LC-MS vial
	EquiSPLASH PC 15:0_18:1(d7)	2.07474
	EquiSPLASH PE 15:0_18:1(d7)	2.19753
	EquiSPLASH PS 15:0_18:1(d7)	1.95397
	EquiSPLASH PG 15:0_18:1(d7)	1.98623
	EquiSPLASH PI 15:0_18:1(d7)	1.80737
	EquiSPLASH LPC 18:1(d7)	2.95526
	EquiSPLASH LPE 18:1(d7)	3.21081
	EquiSPLASH CE 18:1(d7)	1.5625
	EquiSPLASH MG 18:1(d7)	4.29742
	EquiSPLASH DG 15:0_18:1(d7)	2.65741
	EquiSPLASH TG 15:0_18:1(d7)_15:0	1.92339
	EquiSPLASH SM 18:1;2O/18:0(d9)	2.11682
	EquiSPLASH Cer 18:1;2O/15:0(d7)	2.94295
	FA 16:0(d3)	10
	FA 18:0(d3)	10

## Sheet: Table S4
	Table S4: Lipid subclass and the brief summary of annotation rule to characterize lipid molecules
	Category	Main class	Sub class	Ontology	Name	Adduct type	Example (species level)	Example (molecular species level)	Example(Chemical formula:neutral)	Diagnostic ions (Class)	Diagnostic ions (acyl chains)	SMILES	InChIKey	Confirmation level	Reference	Comment
	Fatty acyls [FA]	Fatty acids and Conjugates [FA01]	Hydroxy fatty acids [FA0105]	OxFA	Oxidized fatty acid	[M-H]-	FA 18:1;O	FA 18:1;O	C18H34O3	NL of H2O (m/z 279.2329, 50, C18H31O2)	-	CCCCCC=CCC(O)CCCCCCCCC(O)=O	WVYIZGMCLSGZGG-UHFFFAOYNA-N		https://www.sciencedirect.com/science/article/pii/S2589004220310385
	Fatty acyls [FA]	Fatty acids and Conjugates [FA01]	Hydroxy fatty acids [FA0105]	OxFA	Oxidized fatty acid	[M-H]-	FA 18:1;O	FA 18:1;(2OH)	C18H34O3	NL of H2O (m/z 279.2329, 50, C18H31O2), NL of H2CO2 (m/z 251.2380, 1000, C17H31O)	-	O=C(O)C(O)CCCCCCC=CCCCCCCCC	JBSOOFITVPOOSY-UHFFFAOYSA-N		https://www.sciencedirect.com/science/article/pii/S2589004220310385
	Fatty acyls [FA]	Fatty acids and Conjugates [FA01]	Straight chain fatty acids [FA0101] and Unsaturated fatty acids [FA0103]	FA	Free fatty acid	[M-H]-	FA 18:1	FA 18:1	C18H34O2	-	-	CCCCCCCC\C=C/CCCCCCCC(O)=O	ZQPPMHVWECSIRJ-KTKRTIGZSA-N	Standard confirmed	BML-2803C-0500 (ENZ)
	Fatty acyls [FA]	Fatty amides [FA08]	N-acyl amines [FA0802]	NAGly	N-acyl glycine	[M+H]+, [M+NH4]+	NAGly 31:0	NAGly 15:0/16:0	C33H63NO5	Glycine (m/z 76.039, 1000, C2H6NO2+)	NL of 15:0 Acyl and H2O (m/z 312.25, 650, C18H34NO3+), 16:0 Acyl (m/z 237.222, 810, C16H29O+), 16:0 Acyl -H2O (m/z 219.204, 360, C16H27+)	CCCCCCCCCCCCCCC(=O)OC(CCCCCCCC)CCCCCCC(=O)NCC(O)=O	MWFCMUKEVITITP-UHFFFAOYNA-N	Literature based	https://www.nature.com/articles/nature23874 https://www.nature.com/articles/s41592-019-0344-8
	Fatty acyls [FA]	Fatty amides [FA08]	N-acyl amines [FA0802]	NAGly	N-acyl glycine	[M-H]-	NAGly 31:0	NAGly 15:0/16:0	C33H63NO5	Glycine (m/z 74.025, 140, C2H4NO2-)	15:0 FA (m/z 241.218, 180, C15H29O2-), NL of 15:0 Acyl and H2O (m/z 310.24, 1000, C18H32NO3-), NL of 15:0 Acyl and H2O and CO2 (m/z 266.248, 250, C17H32NO-)	CCCCCCCCCCCCCCC(=O)OC(CCCCCCCC)CCCCCCC(=O)NCC(O)=O	MWFCMUKEVITITP-UHFFFAOYNA-N	Literature based	https://www.nature.com/articles/nature23874 https://www.nature.com/articles/s41592-019-0344-8
	Fatty acyls [FA]	Fatty amides [FA08]	N-acyl amines [FA0802]	NAGlySer	N-acyl glycyl serine	[M+NH4]+	NAGlySer 31:0	NAGlySer 15:0/16:0	C36H68N2O7	GlySer-O (m/z 145.064, 800, C5H9N2O3+)	NL of 15:0 Acyl and H2O (m/z 399.291, 770, C21H38N2O5+), 16:0 Acyl and Gly (m/z 294.245, 1000, C18H32NO2+), 16:0 Acyl (m/z 237.222, C16H29O+), Serine (m/z 106.051, 370, C3H8NO3+)	CCCCCCCCCCCCCCC(=O)OC(CCCCCCCC)CCCCCCC(=O)NCC(=O)NC(CO)C(O)=O	DCZGETGIFUPUNR-UHFFFAOYNA-N	Literature based	https://www.nature.com/articles/nature23874 https://www.nature.com/articles/s41592-019-0344-8
	Fatty acyls [FA]	Fatty amides [FA08]	N-acyl amines [FA0802]	NAGlySer	N-acyl glycyl serine	[M-H]-	NAGlySer 32:0	NAGlySer 15:0/17:0	C37H70N2O7	NL of H2O (m/z 635.502, 20, C37H67N2O6-)	15:0 FA (m/z 241.219, 410, C15H29O2-), NL of 15:0 Acyl and H2O (m/z 411.288, 480, C22H39N2O5-), NL of 15:0 Acyl and H2O and CH2O (m/z 381.274, 1000, C21H37N2O4-), NL of 15:0 Acyl and 2H2O and CO2 (m/z 349.285, 270, C21H37N2O2-)	CCCCCCCCCCCCCCC(=O)OC(CCCCCCCC)CCCCCCCC(=O)NCC(=O)NC(CO)C(O)=O	LXDFIAPIXQCQPG-UHFFFAOYNA-N	Literature based	https://www.nature.com/articles/nature23874 https://www.nature.com/articles/s41592-019-0344-8
	Fatty acyls [FA]	Fatty amides [FA08]	N-acyl amines [FA0802]	NAOrn	N-acyl ornithine	[M+H]+	NAOrn 32:0	NAOrn 15:0/17:0	C37H72N2O5	Ornithine - H2O (m/z 115.086, 1000, C5H11N2O+) Fragment of ornithine (m/z 70.063, 380, C4H8N+)	NL of 15:0 Acyl and H2O (m/z 383.327, 170, C22H43N2O3+), NL of 15:0 Acyl and 2H2O (m/z 365.314, 400, C22H41N2O2+), 17:0+O Acyl - H2O (m/z 251.23, 130, C17H31O+)	CCCCCCCCCCCCCCC(=O)OC(CCCCCCCC)CCCCCCCC(=O)NC(CCCN)C(O)=O	JMDPJDIDPWKBKO-UHFFFAOYNA-N	Literature based	https://www.nature.com/articles/nature23874 https://www.nature.com/articles/s41592-019-0344-8 https://www.ncbi.nlm.nih.gov/pmc/articles/PMC2779474/
	Fatty acyls [FA]	Fatty amides [FA08]	N-acyl ethanolamines (endocannabinoids) [FA0804]	NAE	N-acyl ethanolamines	[M+H]+	NAE 20:4	NAE 20:4	C22H37NO2	-	-	CC\C=C/C\C=C/C\C=C/C\C=C/CCCCCCC(=O)NCCO	ZTNVCFQDUOWGNJ-LTKCOYKYSA-N	Standard confirmed	870430O (Avanti)
	Fatty acyls [FA]	Fatty esters [FA07]	Fatty acyl carnitines [FA0707]	CAR	Acylcarnitine	[M]+	CAR 18:1	CAR 18:1	C25H48NO4	Characteristic fragment (m/z 85.028, 1000, C4H5O2+)	-	CCCCCC\C=C/CCCCCCCCCC(=O)OC(CC(O)=O)C[N+](C)(C)C	HOAMADDCQBUDDY-KHPPLWFENA-O	Standard confirmed	870852P (Avanti)
	Fatty acyls [FA]	Fatty esters [FA07]	Wax monoesters [FA0701]	FAHFA	Fatty acid ester of hydroxy fatty acid	[M-H]-	FAHFA 34:1	FAHFA 16:0/18:1	C34H64O4	-	NL of 16:0 Acyl and H2O (m/z 297.24, 250, C18H33O3-), 16:0 FA (m/z 255.23, 1000, C16H31O2-)	CCCCCCCCCCCCCCCC(=O)OC(CCCCCCC(O)=O)\C=C/CCCCCCCC	VNUWHSZUZKHZTA-COOPMVRXNA-N	Standard confirmed	900409C (Avanti)
	Glycerolipids [GL]	Diradylglycerols [GL02]	1-alkyl,2-acylglycerols [GL0202] and 1-acyl,2-alkylglycerols [GL0207] and 1Z-alkenylacylglycerols [GL0204]	EtherDG	Ether-linked diacylglycerol	[M+NH4]+	DG O-34:1	DG O-16:0_18:1	C37H72O4	-	18:1 DMAG (m/z 339.293, 1000, C21H39O3+)	CCCCCCCCCCCCCCCCOCC(CO)OC(=O)CCCCCCC\C=C/CCCCCCCC	ZDRGKGZHXIWXJD-ZPHPHTNENA-N	Literature based	https://onlinelibrary.wiley.com/doi/book/10.1002/9781119085263
	Glycerolipids [GL]	Diradylglycerols [GL02]	Diacylglycerols [GL0201]	DG	Diacylglycerol	[M+NH4]+	DG 38:4	DG 18:0_20:4	C41H72O5	NL of H2O (m/z 627.522, 190, C41H71O4+)	20:4 DMAG (m/z 361.280, 400, C23H37O3+), 18:0 DMAG (m/z 341.302, 1000, C21H41O3+)	CCCCCCCCCCCCCCCCCC(=O)OCC(CO)OC(=O)CCCCCC\C=C/C\C=C/C\C=C/C\C=C/CC	BRKLTVAHEPCGNK-ZKVKLVECNA-N	Standard confirmed	800811O (Avanti)
	Glycerolipids [GL]	Glycosyldiradylglycerols [GL05]	Glycosylalkylacylglycerols [GL0502]	EtherDGDG	Ether-linked digalactosyldiacylglycerol	[M+HCOO]-, [M+CH3COO]-	DGDG O-34:2	DGDG O-18:2_16:0	C49H90O14	-	NL of 16:0 Acyl (m/z 663.401, 400, C33H59O13-), 16:0 FA (m/z 255.231, 800, C16H31O2-)	CCCCCCCCCCCCCCCC(=O)OC(COCCCCCCCC\C=C/C\C=C/CCCCC)COC1OC(COC2OC(CO)C(O)C(O)C2O)C(O)C(O)C1O	RIZVXDGWUYVMDC-BCTRXSSUNA-N	Structure predicted	NA
	Glycerolipids [GL]	Glycosyldiradylglycerols [GL05]	Glycosylalkylacylglycerols [GL0502]	EtherMGDG	Ether-linked monogalactosyldiacylglycerol	[M+NH4]+	MGDG O-32:0	MGDG O-16:0_16:0	C41H80O9	NL of C6H11O6 (m/z 537.527, 540, C35H69O3+)	16:0 DMAG (m/z 313.273, 1000, C19H37O3+)	CCCCCCCCCCCCCCCCOCC(COC1OC(CO)C(O)C(O)C1O)OC(=O)CCCCCCCCCCCCCCC	SJNQGVXAWCTAPW-UHFFFAOYNA-N	Literature based	http://www.jlr.org/content/44/9/1737
	Glycerolipids [GL]	Glycosyldiradylglycerols [GL05]	Glycosylalkylacylglycerols [GL0502]	EtherMGDG	Ether-linked monogalactosyldiacylglycerol	[M+HCOO]-, [M+CH3COO]-	MGDG O-34:1	MGDG O-16:0_18:1	C43H82O9		18:1 FA (m/z 281.248, 1000, C18H33O2-), NL of 18:1 Acyl (m/z 477.344, 450, C25H49O8-)	CCCCCCCCCCCCCCCCOCC(COC1OC(CO)C(O)C(O)C1O)OC(=O)CCCCCCC\C=C/CCCCCCCC	DYPHHCMHRAPUBW-ZPHPHTNENA-N	Literature based	http://www.jlr.org/content/44/9/1737
	Glycerolipids [GL]	Glycosyldiradylglycerols [GL05]	Glycosylalkylacylglycerols [GL0502]	EtherSMGDG	Semino lipid	[M-H]-	SMGDG O-30:0	SMGDG O-16:0_14:0	C39H76O12S	Hex;S (m/z 241.002, C6H9O8S-), Sulfate (m/z 96.96, HSO4-)	NL of 14:0 Acyl and H2O (m/z 539.29, 1, C25H47O10S-)	CCCCCCCCCCCCCCCCOCC(COC1OC(CO)C(O)C(OS(O)(=O)=O)C1O)OC(=O)CCCCCCCCCCCCC	LPSIUSBXXKDWAC-UHFFFAOYNA-N	Literature based	http://www.jlr.org/content/44/9/1737
	Glycerolipids [GL]	Glycosyldiradylglycerols [GL05]	Glycosyldiacylglycerols [GL0501]	DGDG	Digalactosyldiacylglycerol	[M+NH4]+	DGDG 34:1	DGDG 16:0_18:1	C49H90O15	NL of C12H21O11 (m/z 577.522, 880, C37H69O4+)	18:1 DMAG (m/z 339.289, 840, C21H39O3+), 16:0 DMAG (m/z 313.275, 1000, C19H37O3+)	CCCCCCCCCCCCCCCC(=O)OCC(COC1OC(COC2OC(CO)C(O)C(O)C2O)C(O)C(O)C1O)OC(=O)CCCCCCC\C=C/CCCCCCCC	JRCZTCGPEBCBPF-ZCXUNETKNA-N	Standard confirmed	840524P (Avanti)
	Glycerolipids [GL]	Glycosyldiradylglycerols [GL05]	Glycosyldiacylglycerols [GL0501]	DGDG	Digalactosyldiacylglycerol	[M+HCOO]-, [M+CH3COO]-	DGDG 34:1	DGDG 16:0_18:1	C49H90O15	NL of FA x 2 (m/z 397.131, 760, C15H25O12-) NL of FA x 2 and H2O (m/z 379.127, 1000, C15H23O11-)	16:0 FA (m/z 255.234, 470, C16H31O2-), 18:1 FA (m/z 281.246, 920, C18H33O2-)	CCCCCCCCCCCCCCCC(=O)OCC(COC1OC(COC2OC(CO)C(O)C(O)C2O)C(O)C(O)C1O)OC(=O)CCCCCCC\C=C/CCCCCCCC	JRCZTCGPEBCBPF-ZCXUNETKNA-N	Standard confirmed	840524P (Avanti)
	Glycerolipids [GL]	Glycosyldiradylglycerols [GL05]	Glycosyldiacylglycerols [GL0501]	MGDG	Monogalactosyldiacylglycerol	[M+NH4]+	MGDG 34:1	MGDG 16:0_18:1	C43H80O10	NL of C6H11O6 (m/z 577.513, 600, C37H69O4+)	18:1 DMAG (m/z 339.289, 1000, C21H39O3+), 16:0 DMAG (m/z 313.276, 920, C19H37O3+)	CCCCCCCCCCCCCCCC(=O)OCC(COC1OC(CO)C(O)C(O)C1O)OC(=O)CCCCCCC\C=C/CCCCCCCC	GJPFUHJUTMNEJR-ZCXUNETKNA-N	Standard confirmed	840523P (Avanti)
	Glycerolipids [GL]	Glycosyldiradylglycerols [GL05]	Glycosyldiacylglycerols [GL0501]	MGDG	Monogalactosyldiacylglycerol	[M+HCOO]-, [M+CH3COO]-	MGDG 34:1	MGDG 16:0_18:1	C43H80O10		16:0 FA (m/z 255.233, 770, C16H31O2-), 18:1 FA (m/z 281.251, 1000, C18H33O2-)	CCCCCCCCCCCCCCCC(=O)OCC(COC1OC(CO)C(O)C(O)C1O)OC(=O)CCCCCCC\C=C/CCCCCCCC	GJPFUHJUTMNEJR-ZCXUNETKNA-N	Standard confirmed	840523P (Avanti)
	Glycerolipids [GL]	Glycosyldiradylglycerols [GL05]	Glycosyldiacylglycerols [GL0501]	SQDG	Sulfoquinovosyl diacylglycerol	[M+NH4]+	SQDG 34:1	SQDG 16:0_18:1	C43H80O12S	NL of C6H10O7S (m/z 595.535, 40, C37H71O5+)	18:1 DMAG (m/z 339.289, 920, C21H39O3+), 16:0 DMAG (m/z 313.271, 990, C19H37O3+)	CCCCCCCCCCCCCCCC(=O)OCC(COC1OC(CS(O)(=O)=O)C(O)C(O)C1O)OC(=O)CCCCCCC\C=C/CCCCCCCC	SQOJCPIJIDPYDD-ZCXUNETKNA-N	Standard confirmed	840525P (Avanti)
	Glycerolipids [GL]	Glycosyldiradylglycerols [GL05]	Glycosyldiacylglycerols [GL0501]	SQDG	Sulfoquinovosyl diacylglycerol	[M-H]-	SQDG 32:0	SQDG 16:0_16:0	C41H78O12S	Sulfoquinovosyl -H2O (m/z 225.003, 20, C6H9O7S-)	16:0 FA (m/z 255.232, 20, C16H31O2-), NL of 16:0 Acyl and H2O (m/z 537.274, 50, C25H45O10S-)	CCCCCCCCCCCCCCCC(=O)OCC(COC1OC(CS(O)(=O)=O)C(O)C(O)C1O)OC(=O)CCCCCCCCCCCCCCC	RVUUQPKXGDTQPG-UHFFFAOYNA-N	Standard confirmed	840525P (Avanti)
	Glycerolipids [GL]	Glycosyldiradylglycerols [GL05]		SMGDG	Semino lipid	[M-H]-	SMGDG 40:4	SMGDG 18:0_22:4	C49H86O13S	Characteristic fragment (m/z 241.002, 10, C6H9O8S-; m/z 96.960, 10, HSO4-)	18:0 FA (m/z 283.264, 10, C18H35O2-), 22:4 FA (m/z 331.264, 10, C22H35O2-)	O=C(OCC(OC(=O)CCCCCCCCC=CCC=CCC=CCC=CCC)COC1OC(CO)C(O)C(OS(=O)(=O)O)C1O)CCCCCCCCCCCCCCCCC	LHYYOMYDECQKRJ-UHFFFAOYSA-N		Manually curated	This study
	Glycerolipids [GL]	Glycosylmonoradylglycerols [GL04]	Glycosylmonoacylglycerols [GL0401]	MGMG	Monogalactosylmonoacylglycerol	[M+NH4]+	MGMG 18:1	MGMG 18:1	C27H50O9	NL of Hexose (m/z 339.289, 1000, C21H39O3+)	18:1 Acyl (m/z 265.257, 50, C18H33O+)	O=C(OCC(O)COC1OC(CO)C(O)C(O)C1O)CCCCCCCC=CCCCCCCCC	NFWYGIXMHGBINM-UHFFFAOYSA-N		Manually curated	This study
	Glycerolipids [GL]	Glycosylmonoradylglycerols [GL04]	Glycosylmonoacylglycerols [GL0401]	MGMG	Monogalactosylmonoacylglycerol	[M+HCOO]-, [M+CH3COO]-	MGMG 18:1	MGMG 18:1	C27H50O9	-	18:1 FA (m/z 281.249, 1000, C18H33O2-)	O=C(OCC(O)COC1OC(CO)C(O)C(O)C1O)CCCCCCCC=CCCCCCCCC	NFWYGIXMHGBINM-UHFFFAOYSA-N		Manually curated	This study
	Glycerolipids [GL]	Monoradylglycerols [GL01]	Monoacylglycerols [GL0101]	MG	Monoacylglycerol	[M+NH4]+	MG 18:0	MG 18:0	C21H42O4	[M+H]+ (m/z 359.318, 50, C21H43O4+), NL of H2O (m/z 341.302, 950, C21H41O3+)	-	CCCCCCCCCCCCCCCCCC(=O)OCC(O)CO	VBICKXHEKHSIBG-UHFFFAOYNA-N	Standard confirmed	850535O (Avanti)
	Glycerolipids [GL]	Other Glycerolipids [GL00]		ADGGA	Acyl diacylglyceryl glucuronide	[M+NH4]+	ADGGA 50:2	ADGGA (O-16:0)16:0_18:2	C59H106O12	-	16:0 DMAG (m/z 313.274, 350, C19H37O3+), 18:2 DMAG (m/z 337.274, 320, C21H37O3+), 16:0 FA +C6H6O7 (m/z 415.269, 1000, C22H39O7+)	CCCCCCCCCCCCCCCC(=O)OC(COC1OC(C(O)C(O)C1OC(=O)CCCCCCCCCCCCCCC)C(O)=O)COC(=O)CCCCCCC\C=C/C\C=C/CCCCC	FJDBGXOVRVMDAM-DHSNEXAONA-N	Structure predicted	NA
	Glycerolipids [GL]	Other Glycerolipids [GL00]		ADGGA	Acyl diacylglyceryl glucuronide	[M-H]-	ADGGA 50:2	ADGGA 16:0_16:0_18:2	C59H106O12	-	16:0 FA (m/z 255.231, 120, C16H31O2-), 18:2 FA (m/z 279.234, 60, C18H31O2-)	CCCCCCCCCCCCCCCC(=O)OCC(COC1OC(C(O)C(O)C1OC(=O)CCCCCCC\C=C/C\C=C/CCCCC)C(O)=O)OC(=O)CCCCCCCCCCCCCCC	NLTGUVUXODFZJN-DHSNEXAONA-N	Structure predicted	NA
	Glycerolipids [GL]	Other Glycerolipids [GL00]		DGCC	Diacylglyceryl-3-O-carboxyhydroxymethylcholine	[M+H]+	DGCC 34:1	DGCC 16:0_18:1	C44H83NO8	Characteristic fragment (m/z 132.103, 30, C6H14NO2+)	NL of 16:0 Acyl (m/z 516.386, 3, C28H54NO7+), NL of 16:0 Acyl and H2O (m/z 498.301, 3, C28H52NO6+), NL of 18:1 Acyl (m/z 490.374, 4, C26H52NO7+), NL of 18:1 Acyl and H2O (m/z 472.353, 10, C26H50NO6+)	CCCCCCCCCCCCCCCC(=O)OCC(COC(OCC[N+](C)(C)C)C([O-])=O)OC(=O)CCCCCCC\C=C/CCCCCCCC	PDTNQRNURMVYAJ-MRCUWXFGNA-N	Literature based	https://www.mdpi.com/2218-1989/9/6/119
	Glycerolipids [GL]	Other Glycerolipids [GL00]		DGGA	Diacylglyceryl glucuronide	[M+NH4]+	DGGA 34:2	DGGA 16:0_18:2	C43H76O11	NL of C6H10O7 (m/z 575.511, 1000, C37H67O4+)	18:2 DMAG (m/z 337.274, 320, C21H37O3+), 16:0 DMAG (m/z 313.274, 350, C19H37O3+)	CCCCCCCCCCCCCCCC(=O)OC(COC1OC(C(O)C(O)C1O)C(O)=O)COC(=O)CCCCCCC\C=C/C\C=C/CCCCC	BUAACCTZRHRKAS-BCTRXSSUNA-N	Standard confirmed	Synthesized at https://www.sciencedirect.com/science/article/pii/S0040403917307542
	Glycerolipids [GL]	Other Glycerolipids [GL00]		DGGA	Diacylglyceryl glucuronide	[M-H]-	DGGA 34:2	DGGA 16:0_18:2	C43H76O11	-	16:0 FA (m/z 255.228, 280, C16H31O2-), 18:2 FA (m/z 279.232, 220, C18H31O2-)	CCCCCCCCCCCCCCCC(=O)OC(COC1OC(C(O)C(O)C1O)C(O)=O)COC(=O)CCCCCCC\C=C/C\C=C/CCCCC	BUAACCTZRHRKAS-BCTRXSSUNA-N	Standard confirmed	Synthesized at https://www.sciencedirect.com/science/article/pii/S0040403917307542
	Glycerolipids [GL]	Other Glycerolipids [GL00]		DGTS/A	Diacylglyceryl trimethylhomoserine/diacylglyceryl hydroxymethyl-N,N,N-trimethyl-β-alanine	[M+H]+	DGTS 34:1	DGTS 16:0_18:1	C44H83NO7	Characteristic fragment (m/z 144.105, 10, C7H14NO2+), Characteristic fragment (m/z 236.149, 210, C10H22NO5+)	NL of 16:0 Acyl (m/z 500.393, 330, C28H54NO6+), NL of 16:0 Acyl and H2O (m/z 482.389, 100, C28H52NO5+), NL of 18:1 Acyl (m/z 474.381, 170, C26H52NO6+), NL of 18:1 Acyl and H2O (m/z 456.369, 80, C26H50NO5+)	CCCCCCCCCCCCCCCC(=O)OCC(COCCC(C([O-])=O)[N+](C)(C)C)OC(=O)CCCCCCC\C=C/CCCCCCCC	LMOAWGSXADBGPG-MRCUWXFGNA-N	Literature based	https://www.nature.com/articles/nmeth.3393
	Glycerolipids [GL]	Other Glycerolipids [GL00]		LDGCC	Lysodiacylglyceryl-3-O-carboxyhydroxymethylcholine	[M+H]+	LDGCC 16:0	LDGCC 16:0	C26H51NO7	Characteristic fragment (m/z 132.102, 200, C6H14NO2+)	-	CCCCCCCCCCCCCCCC(=O)OCC(O)COC(OCC[N+](C)(C)C)C([O-])=O	ANDJVEXQBRPJHM-UHFFFAOYNA-N	Literature based	https://www.mdpi.com/2218-1989/9/6/119
	Glycerolipids [GL]	Other Glycerolipids [GL00]		LDGTS/A	Lysodiacylglyceryl trimethylhomoserine/Lysodiacylglyceryl hydroxymethyl-N,N,N-trimethyl-β-alanine	[M+H]+	LDGTS 18:1	LDGTS 18:1	C28H53NO6	Characteristic fragments (m/z 144.1, 50, C7H14NO2+), (m/z 236.149, 1000, C10H22NO5+)	-	CCCCCCCC\C=C/CCCCCCCC(=O)OCC(O)COCCC(C([O-])=O)[N+](C)(C)C	FTLDFSGPEPRILR-SEYXRHQNNA-N	Literature based	https://www.nature.com/articles/nmeth.3393
	Glycerolipids [GL]	Triradylglycerols [GL03]	Alkyldiacylglycerols [GL0302] and 1Z-alkenyldiacylglycerols [GL0304]	EtherTG	Ether-linked triacylglycerol	[M+NH4]+	TG O-56:7	TG O-16:0_18:1_22:6	C59H102O5	-	NL of 16:0 Ether (m/z 649.503, 100, C43H69O4+), NL of 18:1 Acyl and H2O (m/z 609.525, 190, C41H69O3+), NL of 22:6 Acyl and H2O (m/z 565.554, 30, C37H73O3+)	CCCCCCCCCCCCCCCCOCC(COC(=O)CC\C=C/C\C=C/C\C=C/C\C=C/C\C=C/C\C=C/CC)OC(=O)CCCCCCC\C=C/CCCCCCCC	OMDLTBMQAJDLQE-NCLBPQCDNA-N	Literature based	https://onlinelibrary.wiley.com/doi/book/10.1002/9781119085263
	Glycerolipids [GL]	Triradylglycerols [GL03]	Alkyldiacylglycerols [GL0302] and 1Z-alkenyldiacylglycerols [GL0304]	EtherTG	Ether-linked triacylglycerol	[M+Na]+	TG 56:6e	TG O-18:0_16:0_22:6	C59H104O5	-	NL of 16:0 Acyl and H2O (m/z 659.534, 10, C43H72O3Na+), NL of 22:6 Acyl and H2O (m/z 587.529, 4, C37H72O3Na+)	CCCCCCCCCCCCCCCCCCOCC(COC(=O)CC\C=C/C\C=C/C\C=C/C\C=C/C\C=C/C\C=C/CC)OC(=O)CCCCCCCCCCCCCCC	KETUIIAODCHPHD-AZLNLTGWNA-N	Literature based	https://onlinelibrary.wiley.com/doi/book/10.1002/9781119085263
	Glycerolipids [GL]	Triradylglycerols [GL03]	Estolides [GL0305]	TG-EST	Triacylglycerol estolides	[M+NH4]+	TG 68:4;2O	TG 16:1_18:1_18:1;1O(FA 16:0)	C71H130O8	-	NL of 16:1 Acyl and H2O (m/z 857.7571, 400, C55H101O6+), NL of 18:1 Acyl and H2O (m/z 829.7295, 600, C53H97O6+), NL of 16:0 Acyl and H2O (m/z 855.7941, 250, C55H99O6+), NL of 18:1;1O(FA 16:0) and H2O (m/z 575.504, 1000, C37H67O4+)	O=C(OCC(OC(=O)CCCCCCCC=CCCCCCCCC)COC(=O)CCCCCCC(OC(=O)CCCCCCCCCCCCCCC)C=CCCCCCCCC)CCCCCCCC=CCCCCCC	VLMZBLBGLVAGPF-UHFFFAOYNA-N		https://pubs.acs.org/doi/abs/10.1021/acs.jafc.0c07356
	Glycerolipids [GL]	Triradylglycerols [GL03]	Triacylglycerols [GL0301]	TG	Triacylglycerol	[M+NH4]+	TG 56:8	TG 16:0_18:2_22:6	C59H98O6	-	NL of 16:0 Acyl and H2O (m/z 647.502, 320, C43H67O4+), NL of 18:2 Acyl and H2O (m/z 623.499, 280, C41H67O4+), NL of 22:6 Acyl and H2O (m/z 575.498, 1000, C37H67O4+)	CCCCCCCCCCCCCCCC(=O)OCC(COC(=O)CC\C=C/C\C=C/C\C=C/C\C=C/C\C=C/C\C=C/CC)OC(=O)CCCCCCC\C=C/C\C=C/CCCCC	RDZINTYLBOTMAU-BUNKRMPENA-N	Standard confirmed	870110O (Avanti)
	Glycerolipids [GL]	Triradylglycerols [GL03]	Triacylglycerols [GL0301]	TG	Triacylglycerol	[M+Na]+	TG 56:8	TG 16:0_18:2_22:6	C59H98O6	-	NL of 16:0 Acyl and H2O (m/z 669.497, 110, C43H66O4Na+), NL of 18:2 Acyl and H2O (m/z 645.477, 70, C41H66O4Na+), NL of 22:6 Acyl and H2O (m/z 597.485, 110, C37H67O4Na+)	CCCCCCCCCCCCCCCC(=O)OCC(COC(=O)CC\C=C/C\C=C/C\C=C/C\C=C/C\C=C/C\C=C/CC)OC(=O)CCCCCCC\C=C/C\C=C/CCCCC	RDZINTYLBOTMAU-BUNKRMPENA-N	Standard confirmed	870110O (Avanti)
	Glycerolipids [GL]	Triradylglycerols [GL03]		OxTG	Oxidized triacylglycerol	[M+NH4]+	TG 54:5;1O	TG 18:1_18:2_18:2;1O	C57H100O7	-	NL of 18:1 Acyl and H2O (m/z 615.492, 600, C39H67O5+), NL of 18:2 Acyl and H2O (m/z 617.514, 700, C39H69O5+), NL of 18:2 Acyl and O and H2O (m/z 601.5189, 1000, C39H69O4+)	O=C(OCC(OC(=O)CCCCCCCC=CCC=CCCCCC)COC(=O)CCCCCCC(O)C=CCC=CCCCCC)CCCCCCCC=CCCCCCCCC	LBCBAGHQUBQNPI-UHFFFAOYSA-N		https://pubs.acs.org/doi/abs/10.1021/acs.jafc.0c07356
	Glycerophospholipids [GP]	Glycerophosphates [GP10]	Diacylglycerophosphates [GP1001]	PA	Phosphatidic acid	[M-H]-	PA 34:1	PA 16:0_18:1	C37H71O8P	Phosphoglycerol - H2O (m/z 152.996, 310, C3H6O5P-)	16:0 FA (m/z 255.234, 1000, C16H31O2-), 18:1 FA (m/z 281.252, 410, C18H33O2-)	CCCCCCCCCCCCCCCC(=O)OCC(COP(O)(O)=O)OC(=O)CCCCCCC\C=C/CCCCCCCC	OPVZUEPSMJNLOM-ZCXUNETKNA-N	Standard confirmed	840875C (Avanti)
	Glycerophospholipids [GP]	Glycerophosphates [GP10]	Monoacylglycerophosphates [GP1005]	LPA	Lysophosphatidic acid	[M-H]-	LPA 16:0	LPA 16:0	C19H39O7P	Phosphoglycerol - H2O (m/z 152.994, 1000, C3H6O5P-)	-	CCCCCCCCCCCCCCCC(=O)OCC(O)COP(O)(O)=O	YNDYKPRNFWPPFU-UHFFFAOYNA-N	Standard confirmed	857130P (Avanti)
	Glycerophospholipids [GP]	Glycerophosphocholines [GP01]	1-alkyl,2-acylglycerophosphocholines [GP0102] and 1-acyl,2-alkylglycerophosphocholines [GP0108] and 1-(1Z-alkenyl),2-acylglycerophosphocholines [GP0103] and 1-acyl,2-(1Z-alkenyl)-glycerophosphocholines [GP0109] and 1Z-alkenylglycerophosphocholines [GP0107]	EtherPC	Ether-linked phosphatidylcholine	[M+H]+	PC O-38:4	PC O-38:4	C46H86NO7P	Characteristic fragment (m/z 184.073, 1000, C5H15NO4P+)	-	CCCCCCCCCCCCCCCCCCOCC(COP([O-])(=O)OCC[N+](C)(C)C)OC(=O)CCCCCC\C=C/C\C=C/C\C=C/C\C=C/CC	PTKWWHCMNOQBSL-WKUHSSGJNA-N	Standard confirmed	878112P, 852467C (Avanti)
	Glycerophospholipids [GP]	Glycerophosphocholines [GP01]	1-alkyl,2-acylglycerophosphocholines [GP0102] and 1-acyl,2-alkylglycerophosphocholines [GP0108] and 1-(1Z-alkenyl),2-acylglycerophosphocholines [GP0103] and 1-acyl,2-(1Z-alkenyl)-glycerophosphocholines [GP0109] and 1Z-alkenylglycerophosphocholines [GP0107]	EtherPC	Ether-linked phosphatidylcholine	[M+HCOO]-, [M+CH3COO]-	PC O-38:4	PC O-18:0_20:4	C46H86NO7P	NL of CH3 (m/z 780.594, 1000, C45H83NO7P-)	20:4 FA (m/z 303.233, 990, C20H31O2-)	CCCCCCCCCCCCCCCCCCOCC(COP([O-])(=O)OCC[N+](C)(C)C)OC(=O)CCCCCC\C=C/C\C=C/C\C=C/C\C=C/CC	PTKWWHCMNOQBSL-WKUHSSGJNA-N	Standard confirmed	878112P, 852467C (Avanti)
	Glycerophospholipids [GP]	Glycerophosphocholines [GP01]	Diacylglycerophosphocholines [GP0101]	PC	Phosphatidylcholine	[M+H]+	PC 38:4	PC 18:0_20:4	C46H84NO8P	Characteristic fragment (m/z 184.073, 1000, C5H15NO4P+)	NL of 18:0 Acyl (m/z 544.326, 1, C28H51NO7P+), NL of 18:0 Acyl and H2O (m/z 526.317, 2, C28H49NO6P+), NL of 20:4 Acyl (m/z 524.367, 6, C26H55NO7P+), NL of 20:4 Acyl and H2O (m/z 506.364, 2, C26H53NO6P+)	CCCCCCCCCCCCCCCCCC(=O)OCC(COP([O-])(=O)OCC[N+](C)(C)C)OC(=O)CCCCCC\C=C/C\C=C/C\C=C/C\C=C/CC	HAKKEJDMTIQLJH-WKUHSSGJNA-N	Standard confirmed	850375P (Avanti)
	Glycerophospholipids [GP]	Glycerophosphocholines [GP01]	Diacylglycerophosphocholines [GP0101]	PC	Phosphatidylcholine	[M+Na]+	PC 38:4	PC 38:4	C46H84NO8P	NL of C3H9N (m/z 773.509, 490, C43H75O8PNa+), NL of C5H14NO4P (m/z 649.516, 720, C41H70O4PNa+), Characteristic fragment (m/z 146.979, 120, C2H5O4PNa+)	-	CCCCCCCCCCCCCCCCCC(=O)OCC(COP([O-])(=O)OCC[N+](C)(C)C)OC(=O)CCCCCC\C=C/C\C=C/C\C=C/C\C=C/CC	HAKKEJDMTIQLJH-WKUHSSGJNA-N	Standard confirmed	850375P (Avanti)
	Glycerophospholipids [GP]	Glycerophosphocholines [GP01]	Diacylglycerophosphocholines [GP0101]	PC	Phosphatidylcholine	[M+HCOO]-, [M+CH3COO]-	PC 38:4	PC 18:0_20:4	C46H84NO8P	NL of CH3 (m/z 794.563, 1000, C45H81NO8P-)	18:0 FA (m/z 283.268, 440, C18H35O2-), 20:4 FA (m/z 303.235, 930, C20H31O2-)	CCCCCCCCCCCCCCCCCC(=O)OCC(COP([O-])(=O)OCC[N+](C)(C)C)OC(=O)CCCCCC\C=C/C\C=C/C\C=C/C\C=C/CC	HAKKEJDMTIQLJH-WKUHSSGJNA-N	Standard confirmed	850375P (Avanti)
	Glycerophospholipids [GP]	Glycerophosphocholines [GP01]	Monoacylglycerophosphocholines [GP0105]	LPC	Lysophophatidylcholine	[M+H]+	LPC 18:1	LPC 18:1	C26H52NO7P	Characteristic fragment (m/z 184.068, 1000, C5H15NO4P+)	-	CCCCCCCC\C=C/CCCCCCCC(=O)OCC(O)COP([O-])(=O)OCC[N+](C)(C)C	YAMUFBLWGFFICM-SEYXRHQNNA-N	Standard confirmed	845875P (Avanti)
	Glycerophospholipids [GP]	Glycerophosphocholines [GP01]	Monoacylglycerophosphocholines [GP0105]	LPC	Lysophophatidylcholine	[M+Na]+	LPC 18:1	LPC 18:1	C26H52NO7P	NL of C3H9N (m/z 485.264, 1000, C23H43O7PNa+)	-	CCCCCCCC\C=C/CCCCCCCC(=O)OCC(O)COP([O-])(=O)OCC[N+](C)(C)C	YAMUFBLWGFFICM-SEYXRHQNNA-N	Standard confirmed	845875P (Avanti)
	Glycerophospholipids [GP]	Glycerophosphocholines [GP01]	Monoacylglycerophosphocholines [GP0105]	LPC	Lysophophatidylcholine	[M+HCOO]-, [M+CH3COO]-	LPC 18:1	LPC 18:1	C26H52NO7P	NL of CH3 (m/z 506.324, 340, C25H49NO7P-)	-	CCCCCCCC\C=C/CCCCCCCC(=O)OCC(O)COP([O-])(=O)OCC[N+](C)(C)C	YAMUFBLWGFFICM-SEYXRHQNNA-N	Standard confirmed	845875P (Avanti)
	Glycerophospholipids [GP]	Glycerophosphocholines [GP01]	Monoalkylglycerophosphocholines [GP0106] and 1Z-alkenylglycerophosphocholines [GP0107]	EtherLPC	Ether-linked lysophosphatidylcholine	[M+H]+	LPC O-18:1	LPC O-18:1	C26H54NO6P	Characteristic fragments (m/z 104.112, 1000, C5H14NO+), (m/z 125.001, 280, C2H6O4P+), (m/z 184.07, 330, C5H15NO4P+)	-	CCCCCCCC\C=C/CCCCCCCCOCC(O)COP([O-])(=O)OCC[N+](C)(C)C	XWYSLMAMRKYUFH-SEYXRHQNNA-N	Literature based	https://onlinelibrary.wiley.com/doi/book/10.1002/9781119085263
	Glycerophospholipids [GP]	Glycerophosphocholines [GP01]	Monoalkylglycerophosphocholines [GP0106] and 1Z-alkenylglycerophosphocholines [GP0107]	EtherLPC	Ether-linked lysophosphatidylcholine	[M+HCOO]-, [M+CH3COO]-	LPC O-18:1	LPC O-18:1	C26H54NO6P	NL of CH3 (m/z 492.337, 1000, C25H51NO6P-), Characteristic fragment (m/z 168.043, 110, C4H11NO4P-)	-	CCCCCCCC\C=C/CCCCCCCCOCC(O)COP([O-])(=O)OCC[N+](C)(C)C	XWYSLMAMRKYUFH-SEYXRHQNNA-N	Literature based	https://onlinelibrary.wiley.com/doi/book/10.1002/9781119085263
	Glycerophospholipids [GP]	Glycerophosphoethanolamines [GP02]	1-alkyl,2-acylglycerophosphoethanolamines [GP0202] and 1-(1Z-alkenyl),2-acylglycerophosphoethanolamines [GP0203]	EtherPE_O	Ether-linked phosphatidylethanolamine	[M+H]+	PE O-34:1	PE O-16:0_18:1	C39H78NO7P	NL of C2H8NO4P (m/z 563.536, 1000, C37H71O3+)	18:1 Acyl (m/z 265.257, 10, C18H33O+)	CCCCCCCCCCCCCCCCOCC(COP(O)(=O)OCCN)OC(=O)CCCCCCC\C=C/CCCCCCCC	JJGMGPGKWYLISM-ZPHPHTNENA-N	Standard confirmed	878130C (Avanti)
	Glycerophospholipids [GP]	Glycerophosphoethanolamines [GP02]	1-alkyl,2-acylglycerophosphoethanolamines [GP0202] and 1-(1Z-alkenyl),2-acylglycerophosphoethanolamines [GP0203]	EtherPE_O	Ether-linked phosphatidylethanolamine	[M-H]-	PE O-34:1	PE O-16:0_18:1	C39H78NO7P	-	18:1 FA (m/z 281.254, 1000, C18H33O2-), NL of 18:1 Acyl (m/z 438.309, 50, C21H45NO6P-)	CCCCCCCCCCCCCCCCOCC(COP(O)(=O)OCCN)OC(=O)CCCCCCC\C=C/CCCCCCCC	JJGMGPGKWYLISM-ZPHPHTNENA-N	Standard confirmed	878130C (Avanti)
	Glycerophospholipids [GP]	Glycerophosphoethanolamines [GP02]	1-alkyl,2-acylglycerophosphoethanolamines [GP0202] and 1-(1Z-alkenyl),2-acylglycerophosphoethanolamines [GP0203]	EtherPE_P	Ether-linked phosphatidylethanolamine	[M+H]+	PE P-38:3	PE P-18:0_20:3	C43H80NO7P	NL of C2H8NO4P (m/z 613.548, 120, C41H73O3+)	18:0p Ether +C2H8NO3P (m/z 392.288, 290, C20H43NO4P+), 20:3 DMAG (m/z 363.288, 1000, C23H39O3+)	CCCCCCCCCCCCCCCC\C=C\OCC(COP(O)(=O)OCCN)OC(=O)CCCCCC\C=C/C\C=C/C\C=C/CCCCC	AFHNYJFSTNQXTK-WSNOBPJUNA-N	Standard confirmed	852758P (Avanti)
	Glycerophospholipids [GP]	Glycerophosphoethanolamines [GP02]	Diacylglycerophosphoethanolamines [GP0201]	LNAPE	N-acyl-lysophosphatidylethanolamine	[M-H]-	LNAPE 34:2	LNAPE 16:0/N-18:2	C39H74NO8P	Phosphoglycerol - H2O (m/z 152.996, 100, C3H6O5P-)	16:0 FA (m/z 255.23, 1000, C16H31O2-), NL of 16:0 Acyl (m/z 476.285, 20, C23H43NO7P-), NL of 16:0 Acyl and H2O (m/z 458.268, 90, C23H41NO6P-)	CCCCCCCCCCCCCCCC(=O)OCC(O)COP(O)(=O)OCCNC(=O)CCCCCCC\C=C/C\C=C/CCCCC	PCFLXHVJMLSQIP-BCTRXSSUNA-N	Literature based	https://onlinelibrary.wiley.com/doi/book/10.1002/9781119085263
	Glycerophospholipids [GP]	Glycerophosphoethanolamines [GP02]	Diacylglycerophosphoethanolamines [GP0201]	PE	Phosphatidylethanolamine	[M+H]+	PE 38:4	PE 18:0_20:4	C43H78NO8P	NL of C2H8NO4P (m/z 627.536, 1000, C41H71O4+)	18:0 Acyl (m/z 267.263, 10, C18H35O+), 20:4 Acyl (m/z 287.241, 10, C20H31O+)	CCCCCCCCCCCCCCCCCC(=O)OCC(COP(O)(=O)OCCN)OC(=O)CCCCCC\C=C/C\C=C/C\C=C/C\C=C/CC	YEHAZLUVAZKVRO-ZKVKLVECNA-N	Standard confirmed	850725P (Avanti)
	Glycerophospholipids [GP]	Glycerophosphoethanolamines [GP02]	Diacylglycerophosphoethanolamines [GP0201]	PE	Phosphatidylethanolamine	[M+Na]+	PE 38:4	PE 38:4	C43H78NO8P	NL of C2H5N (m/z 747.47, 220, C41H73O8PNa+), NL of C2H8NO4P (m/z 649.499, 690, C41H70O4Na+)	-	CCCCCCCCCCCCCCCCCC(=O)OCC(COP(O)(=O)OCCN)OC(=O)CCCCCC\C=C/C\C=C/C\C=C/C\C=C/CC	YEHAZLUVAZKVRO-ZKVKLVECNA-N	Standard confirmed	850725P (Avanti)
	Glycerophospholipids [GP]	Glycerophosphoethanolamines [GP02]	Diacylglycerophosphoethanolamines [GP0201]	PE	Phosphatidylethanolamine	[M-H]-	PE 38:4	PE 18:0_20:4	C43H78NO8P	Characteristic fragment (m/z 196.036, 40, C5H11NO5P-)	18:0 FA (m/z 283.265, 560, C18H35O2-), 20:4 FA (m/z 303.233, 1000, C20H31O2-)	CCCCCCCCCCCCCCCCCC(=O)OCC(COP(O)(=O)OCCN)OC(=O)CCCCCC\C=C/C\C=C/C\C=C/C\C=C/CC	YEHAZLUVAZKVRO-ZKVKLVECNA-N	Standard confirmed	850725P (Avanti)
	Glycerophospholipids [GP]	Glycerophosphoethanolamines [GP02]	Monoacylglycerophosphoethanolamines [GP0205]	LPE	Lysophosphatidylethanolamine	[M+H]+, [M+Na]+	LPE 18:1	LPE 18:1	C23H46NO7P	NL of C2H8NO4P (m/z 339.286, 1000, C21H39O3+)	-	CCCCCCCC\C=C/CCCCCCCC(=O)OCC(O)COP(O)(=O)OCCN	PYVRVRFVLRNJLY-KTKRTIGZNA-N	Standard confirmed	846725P (Avanti)
	Glycerophospholipids [GP]	Glycerophosphoethanolamines [GP02]	Monoacylglycerophosphoethanolamines [GP0205]	LPE	Lysophosphatidylethanolamine	[M-H]-	LPE 18:1	LPE 18:1	C23H46NO7P	NL of C5H12NO5P (as SN1) (m/z 281.243, 1000, C18H33O2-)	-	CCCCCCCC\C=C/CCCCCCCC(=O)OCC(O)COP(O)(=O)OCCN	PYVRVRFVLRNJLY-KTKRTIGZNA-N	Standard confirmed	846725P (Avanti)
	Glycerophospholipids [GP]	Glycerophosphoethanolamines [GP02]	Monoalkylglycerophosphoethanolamines [GP0206] and 1Z-alkenylglycerophosphoethanolamines [GP0207]	EtherLPE	Ether-linked lysophosphatidylethanolamine	[M+H]+	LPE O-18:1	LPE O-18:1	C23H48NO6P	NL of C3H8NO4P (m/z 312.329, 470, C20H42NO+), NL of C3H10NO5P (m/z 294.315, 1000, C20H40N+)	-	CCCCCCCCCCCCCCCC\C=C/OCC(O)COP(O)(=O)OCCN	KACDZDULGKPXHT-ZPHPHTNENA-N	Literature based	https://onlinelibrary.wiley.com/doi/book/10.1002/9781119085263
	Glycerophospholipids [GP]	Glycerophosphoethanolamines [GP02]	Monoalkylglycerophosphoethanolamines [GP0206] and 1Z-alkenylglycerophosphoethanolamines [GP0207]	EtherLPE	Ether-linked lysophosphatidylethanolamine	[M-H]-	LPE P-18:0	LPE P-18:0	C23H48NO6P	Phosphoethanolamine (m/z 140.009, 310, C2H7NO4P-), Characteristic fragment (m/z 196.038, 750, C5H11NO5P-)	18:1 Ether (m/z 267.266, 690, C18H35O-)	CCCCCCCCCCCCCCCC\C=C/OCC(O)COP(O)(=O)OCCN	KACDZDULGKPXHT-ZPHPHTNENA-N	Standard confirmed	852471P (Avanti)
	Glycerophospholipids [GP]	Glycerophosphoethanolamines [GP02]		DMPE	N-Dimethylphosphatidylethanolamine	[M+H]+	DMPE 34:1	DMPE 16:0_18:1	C41H80NO8P	NL of C4H12NO4P (m/z 577.519, 1000, C37H69O4+)	16:0 Acyl (m/z 239.237, 50, C16H31O+), 18:1 Acyl (m/z 265.257, 50, C18H33O+)	O=C(OCC(OC(=O)CCCCCCCC=CCCCCCCCC)COP(=O)(O)OCCN(C)C)CCCCCCCCCCCCCCC	ZSVMWQMKUKDZTH-UHFFFAOYSA-N		https://www.ncbi.nlm.nih.gov/pmc/articles/PMC3811537/	This study
	Glycerophospholipids [GP]	Glycerophosphoethanolamines [GP02]		DMPE	N-Dimethylphosphatidylethanolamine	[M-H]-	DMPE 34:1	DMPE 16:0_18:1	C41H80NO8P	-	16:0 FA- (m/z 255.233, 1000, C16H31O2-), 18:1 FA (m/z 281.249, 1000, C18H33O2-)	O=C(OCC(OC(=O)CCCCCCCC=CCCCCCCCC)COP(=O)(O)OCCN(C)C)CCCCCCCCCCCCCCC	ZSVMWQMKUKDZTH-UHFFFAOYSA-N		https://www.ncbi.nlm.nih.gov/pmc/articles/PMC3811537/	This study
	Glycerophospholipids [GP]	Glycerophosphoethanolamines [GP02]		MMPE	N-Monomethylphosphatidylethanolamine	[M+H]+	MMPE 34:1	MMPE 16:0_18:1	C40H78NO8P	NL of C3H10NO4P (m/z 577.519, 1000, C37H69O4+)	16:0 Acyl (m/z 239.237, 50, C16H31O+), 18:1 Acyl (m/z 265.257, 50, C18H33O+)	O=C(OCC(OC(=O)CCCCCCCC=CCCCCCCCC)COP(=O)(O)OCCNC)CCCCCCCCCCCCCCC	YAOJJIUXLIFZQN-UHFFFAOYSA-N		https://www.ncbi.nlm.nih.gov/pmc/articles/PMC3811537/	This study
	Glycerophospholipids [GP]	Glycerophosphoethanolamines [GP02]		MMPE	N-Monomethylphosphatidylethanolamine	[M-H]-	MMPE 34:1	MMPE 16:0_18:1	C40H78NO8P	-	16:0 FA- (m/z 255.233, 1000, C16H31O2-), 18:1 FA (m/z 281.249, 1000, C18H33O2-)	O=C(OCC(OC(=O)CCCCCCCC=CCCCCCCCC)COP(=O)(O)OCCNC)CCCCCCCCCCCCCCC	YAOJJIUXLIFZQN-UHFFFAOYSA-N		https://www.ncbi.nlm.nih.gov/pmc/articles/PMC3811537/	This study
	Glycerophospholipids [GP]	Glycerophosphoglycerols [GP04]	1-alkyl,2-acylglycerophosphoglycerols [GP0402] and 1-(1Z-alkenyl),2-acylglycerophosphoglycerols [GP0403]	EtherPG	Ether-linked phosphatidylglycerol	[M-H]-	PG O-34:1	PG O-18:1_16:0	C40H79O9P	Phosphoglycerol - H2O (m/z 152.995, 80, C3H6O5P-)	18:1 Ether + O (m/z 283.265, 290, C18H35O2-), 16:0 FA (m/z 255.232, 1000, C16H31O2-)	CCCCCCCCCCCCCCCC(=O)OC(COCCCCCCCC\C=C/CCCCCCCC)COP(O)(=O)OCC(O)CO	HYKWYOORLWSMCU-ZCXUNETKNA-N	Literature based	https://onlinelibrary.wiley.com/doi/book/10.1002/9781119085263
	Glycerophospholipids [GP]	Glycerophosphoglycerols [GP04]	Diacylglycerophosphoglycerols [GP0401]	PG	Phosphatidylglycerol	[M+NH4]+	PG 38:4	PG 18:0_20:4	C44H79O10P	NL of C3H8O6P (m/z 627.537, 1000, C41H71O4+)	18:0 DMAG (m/z 341.304, 270, C21H41O3+), 20:4 DMAG (m/z 361.275, 90, C23H37O3+)	CCCCCCCCCCCCCCCCCC(=O)OCC(COP(O)(=O)OCC(O)CO)OC(=O)CCCCCC\C=C/C\C=C/C\C=C/C\C=C/CC	JDHPBMPBPWNFFB-ZKVKLVECNA-N	Standard confirmed	840475P (Avanti)
	Glycerophospholipids [GP]	Glycerophosphoglycerols [GP04]	Diacylglycerophosphoglycerols [GP0401]	PG	Phosphatidylglycerol	[M-H]-	PG 38:4	PG 18:0_20:4	C44H79O10P	Phosphoglycerol - H2O (m/z 152.987, 50, C3H6O5P-)	18:0 FA (m/z 283.259, 260, C18H35O2-), 20:4 FA (m/z 303.231, 740, C20H31O2-)	CCCCCCCCCCCCCCCCCC(=O)OCC(COP(O)(=O)OCC(O)CO)OC(=O)CCCCCC\C=C/C\C=C/C\C=C/C\C=C/CC	JDHPBMPBPWNFFB-ZKVKLVECNA-N	Standard confirmed	840475P (Avanti)
	Glycerophospholipids [GP]	Glycerophosphoglycerols [GP04]	Diacylglycerophosphomonoradylglycerols [GP0409]	HBMP	Hemibismonoacylglycerophosphate	[M+NH4]+	HBMP 52:3	HBMP 18:1/16:1_18:1	C58H107O11P	-	NL of 18:1 DMAG and H3PO3 and H2O (m/z 575.501, 1000, C37H67O4+), 16:1 DMAG (m/z 311.259, 70, C19H35O3+), 18:1 DMAG (m/z 339.284, 180, C21H39O3+)	CCCCCCCC\C=C/CCCCCCCC(=O)OC(CO)COP(O)(=O)OCC(COC(=O)CCCCCCC\C=C/CCCCCC)OC(=O)CCCCCCC\C=C/CCCCCCCC	MXVQIGMBUPXWRN-CABVQDRLNA-N	Standard confirmed	857134P (Avanti)
	Glycerophospholipids [GP]	Glycerophosphoglycerols [GP04]	Diacylglycerophosphomonoradylglycerols [GP0409]	HBMP	Hemibismonoacylglycerophosphate	[M-H]-	HBMP 50:2	HBMP 16:0/16:0_18:2	C56H105O11P	-	16:0 DMAG + H2PO3 (m/z 391.22, 60, C19H36PO6-), 16:0 FA (m/z 255.232, 230, C16H31O2-), 18:2 FA (m/z 279.23, 460, C18H33O2-)	CCCCCCCCCCCCCCCC(=O)OC(CO)COP(O)(=O)OCC(COC(=O)CCCCCCC\C=C/C\C=C/CCCCC)OC(=O)CCCCCCCCCCCCCCC	CUDDSUOFIHDHJN-DHSNEXAONA-N	Standard confirmed	857134P (Avanti)
	Glycerophospholipids [GP]	Glycerophosphoglycerols [GP04]	Monoacylglycerophosphoglycerols [GP0405]	LPG	Lysophosphatidylglycerol	[M-H]-	LPG 18:1	LPG 18:1	C24H47O9P	Phosphoglycerol - H2O (m/z 152.993, 110, C3H6O5P-)	-	CCCCCCCC\C=C/CCCCCCCC(=O)OCC(O)COP(O)(=O)OCC(O)CO	FQQQKGAFQIIGLQ-KTKRTIGZNA-N	Standard confirmed	858125P (Avanti)
	Glycerophospholipids [GP]	Glycerophosphoglycerols [GP04]	Monoacylglycerophosphomonoradylglycerols [GP0410]	BMP	Bismonoacylglycerophosphate	[M+NH4]+	BMP 40:5	BMP 18:1_22:4	C46H81O10P	NL of C3H8O6P (m/z 653.57, 70, C40H77O6+)	18:1 DMAG (m/z 339.287, 1000, C21H39O3+), 22:4 DMAG (m/z 389.305, 530, C25H41O3+)	CCCCCCCC\C=C/CCCCCCCC(=O)OC(CO)COP(O)(=O)OCC(CO)OC(=O)CCCCCCCC\C=C/C\C=C/C\C=C/C\C=C/CC	KWAXGWUDHUPXQN-DCMOKHIZNA-N	Standard confirmed	857133P (Avanti)
	Glycerophospholipids [GP]	Glycerophosphoglycerols [GP04]	Monoalkylglycerophosphoglycerols [GP0406] and 1Z-alkenylglycerophosphoglycerols [GP0407]	EtherLPG	Ether-linked lysophosphatidylglycerol	[M-H]-	LPG O-18:1	LPG O-18:1	C24H49O8P	Phosphoglycerol - H2O (m/z 152.997, 1000, C3H6O5P-)	18:1 Ether (m/z 267.276, 250, C18H35O-)	CCCCCCCC\C=C/CCCCCCCCOCC(O)COP(O)(=O)OCC(O)CO	WOQCBNBIWAYDQK-KTKRTIGZNA-N	Literature based	https://onlinelibrary.wiley.com/doi/book/10.1002/9781119085263
	Glycerophospholipids [GP]	Glycerophosphoglycerophosphoglycerols [GP12]	Diacylglycerophosphoglycerophosphodiradylglycerols [GP1201]	CL	Cardiolipin	[M+NH4]+	CL 70:4	CL 34:1_36:3	C79H146O17P2	-	(R1+R2 (34:1)) + C3H3 (m/z 577.511, 840, C37H69O4+), (R3+R4 (36:3)) + C3H3 (m/z 601.513, 1000, C39H69O4+)	CCCCCCCCCCCCCCCC(=O)OC(COC(=O)CCCCCCC\C=C/CCCCCCCC)COP(O)(=O)OCC(O)COP(O)(=O)OCC(COC(=O)CCCCCCC\C=C/C\C=C/CCCCC)OC(=O)CCCCCCCCCC\C=C/CCCCC	LDMWDTCYJRXJER-BKVWNNRANA-N	Standard confirmed	710341C (Avanti)
	Glycerophospholipids [GP]	Glycerophosphoglycerophosphoglycerols [GP12]	Diacylglycerophosphoglycerophosphodiradylglycerols [GP1201]	CL	Cardiolipin	[M-H]-	CL 70:5	CL 16:0_18:1_18:2_18:2	C79H144O17P2	Phosphoglycerol - H2O (m/z 152.989, 230, C3H6O5P-)	16:0 FA + 18:2 FA + C3H6O4P (m/z 673.468, 300, C37H70O8P-), 18:2 FA + 18:2 FA + C3H6O4P (m/z 695.459, 490, C39H68O8P-), 16:0 FA (m/z 255.222, 300, C16H31O2-), 18:1 FA (m/z 281.242, 300, C18H33O2-), 18:2 FA (m/z 279.221, 390, C18H31O2-)	CCCCCCCCCCCCCCCC(=O)OC(COC(=O)CCCCCCC\C=C/CCCCCCCC)COP(O)(=O)OCC(O)COP(O)(=O)OCC(COC(=O)CCCCCCC\C=C/C\C=C/CCCCC)OC(=O)CCCCCCC\C=C/C\C=C/CCCCC	NRSNLZLGIJBZSA-GFMWECAPNA-N	Standard confirmed	710341C (Avanti)
	Glycerophospholipids [GP]	Glycerophosphoglycerophosphoglycerols [GP12]	Diacylglycerophosphoglycerophosphomonoradylglycerols [GP1202]	MLCL	Lysocardiolipin	[M-H]-	MLCL 56:7	MLCL 16:0_16:0_16:0	C57H112O16P2	Phosphoglycerol - H2O (m/z 152.993, 50, C3H6O5P-)	16:0 FA + C3H6O5P (m/z 409.23, 110, C19H38O7P-), 16:0 FA + 16:0 FA +C3H4O4P (m/z 647.462, 140, C35H68O8P-), 16:0 FA (m/z 255.228, 50, C16H31O2-)	CCCCCCCCCCCCCCCC(=O)OCC(O)COP(O)(=O)OCC(O)COP(O)(=O)OCC(COC(=O)CCCCCCCCCCCCCCC)OC(=O)CCCCCCCCCCCCCCC	VGERFNNSKBECLU-UHFFFAOYNA-N	Literature based	https://www.nature.com/articles/s41598-018-23190-z
	Glycerophospholipids [GP]	Glycerophosphoglycerophosphoglycerols [GP12]	Monoacylglycerophosphoglycerophosphomonoradylglycerols [GP1207]	DLCL	Dilysocardiolipin	[M-H]-	DLCL 34:2	DLCL 16:0_18:2	C43H82O15P2	Phosphoglycerol - H2O (m/z 152.995, 240, C3H6O5P-)	16:0 FA +C3H6O5P (m/z 409.23, 220, C19H38O7P-), 18:2 FA +C3H6O5P (m/z 433.23, 130, C21H38O7P-)	CCCCCCCCCCCCCCCC(=O)OCC(O)COP(O)(=O)OCC(O)COP(O)(=O)OCC(O)COC(=O)CCCCCCCC\C=C\C=C\CCCCC	FETCDGKJIFEJLQ-SBLPRGNDNA-N	Literature based	http://www.jlr.org/content/52/2/389
	Glycerophospholipids [GP]	Glycerophosphoinositols [GP06]	1-alkyl,2-acylglycerophosphoinositols [GP0602] and 1-(1Z-alkenyl),2-acylglycerophosphoinositols [GP0603]	EtherPI	Ether-linked phosphatidylinositol	[M-H]-	PI O-36:4	PI O-16:0_20:4	C45H81O12P	Phosphoinositol - H2O (m/z 241.011, 90, C6H10O8P-)	16:0 Ether + C3H5O4P (m/z 377.241, 190, C19H38O5P-) 20:4 FA (m/z 303.228, 190, C20H31O2-)	CCCCCCCCCCCCCCCCOCC(COP(O)(=O)OC1C(O)C(O)C(O)C(O)C1O)OC(=O)CCCCCC\C=C/C\C=C/C\C=C/C\C=C/CC	WYUJHUHIPXIISK-PYQGTGCGNA-N	Literature based	https://onlinelibrary.wiley.com/doi/book/10.1002/9781119085263
	Glycerophospholipids [GP]	Glycerophosphoinositols [GP06]	Diacylglycerophosphoinositols [GP0601]	PI	Phosphatidylinositol	[M+NH4]+	PI 38:4	PI 38:4	C47H83O13P	NL of C6H13O9P (m/z 627.532, 1000, C41H71O4+)	-	CCCCCCCCCCCCCCCCCC(=O)OCC(COP(O)(=O)OC1C(O)C(O)C(O)C(O)C1O)OC(=O)CCCCCC\C=C/C\C=C/C\C=C/C\C=C/CC	OJESNYFIPWSOPO-ZKVKLVECNA-N	Standard confirmed	850149P (Avanti)
	Glycerophospholipids [GP]	Glycerophosphoinositols [GP06]	Diacylglycerophosphoinositols [GP0601]	PI	Phosphatidylinositol	[M+Na]+	PI 38:4	PI 38:4	C47H83O13P	NL of C6H13O9P (m/z 649.512, 280, C41H70O4Na+) (m/z 627.538, 380, C41H71O4+), Phosphoinositol (m/z 283.017, 1000, C6H13O9PNa+)	-	CCCCCCCCCCCCCCCCCC(=O)OCC(COP(O)(=O)OC1C(O)C(O)C(O)C(O)C1O)OC(=O)CCCCCC\C=C/C\C=C/C\C=C/C\C=C/CC	OJESNYFIPWSOPO-ZKVKLVECNA-N	Standard confirmed	850149P (Avanti)
	Glycerophospholipids [GP]	Glycerophosphoinositols [GP06]	Diacylglycerophosphoinositols [GP0601]	PI	Phosphatidylinositol	[M-H]-	PI 38:4	PI 18:0_20:4	C47H83O13P	Phosphoinositol - H2O (m/z 241.013, 140, C6H10O8P-), Characteristic fragment (m/z 297.035, 30, C9H14O9P-)	18:0 FA (m/z 283.262, 190, C18H35O2-), 20:4 FA (m/z 303.232, 180, C20H31O2-)	CCCCCCCCCCCCCCCCCC(=O)OCC(COP(O)(=O)OC1C(O)C(O)C(O)C(O)C1O)OC(=O)CCCCCC\C=C/C\C=C/C\C=C/C\C=C/CC	OJESNYFIPWSOPO-ZKVKLVECNA-N	Standard confirmed	850149P (Avanti)
	Glycerophospholipids [GP]	Glycerophosphoinositols [GP06]	Monoacylglycerophosphoinositols [GP0605]	LPI	Lysophosphatidylinositol	[M-H]-	LPI 18:1	LPI 18:1	C27H51O12P	Phosphoinositol - H2O (m/z 241.008, 380, C6H10O8P-), Characteristic fragment (m/z 315.049, 240, C9H16O10P-)	18:1 FA (m/z 281.249, 860, C18H33O2-)	CCCCCCCC\C=C/CCCCCCCC(=O)OCC(O)COP(O)(=O)OC1C(O)C(O)C(O)C(O)C1O	UGDOFRYHDCDVHD-KTKRTIGZNA-N	Standard confirmed	850100P (Avanti)
	Glycerophospholipids [GP]	Glycerophosphoserines [GP03]	1-alkyl,2-acylglycerophosphoserines [GP0302] and 1-(1Z-alkenyl),2-acylglycerophosphoserines [GP0303]	EtherPS	Ether-linked phosphatidylserine	[M-H]-	PS O-38:6	PS O-16:0_22:6	C44H76NO9P	NL of C3H5NO2 (m/z 705.484, 670, C41H70O7P-)	NL of 22:6 Acyl and H2O and C3H5NO2 (m/z 377.242, 1000, C19H38O5P-), 22:6 FA (m/z 327.234, 30, C22H31O2-)	CCCCCCCCCCCCCCCCOCC(COP(O)(=O)OCC(N)C(O)=O)OC(=O)CC\C=C/C\C=C/C\C=C/C\C=C/C\C=C/C\C=C/CC	IYFFSZNOPSWCNI-YKPVOZFUNA-N	Literature based	https://onlinelibrary.wiley.com/doi/book/10.1002/9781119085263
	Glycerophospholipids [GP]	Glycerophosphoserines [GP03]	Diacylglycerophosphoserines [GP0301]	LNAPS	N-acyl-lysophosphatidylserine	[M-H]-	LNAPS 34:0	LNAPS 18:0/N-16:0	C40H78NO10P	Phosphoglycerol - H2O (m/z 152.99, 720, C3H6O5P-)	NL of 16:0 Acyl and C3H5NO2 (m/z 437.256, 1000, C21H42O7P-)	CCCCCCCCCCCCCCCCCC(=O)OCC(O)COP(O)(=O)OCC(NC(=O)CCCCCCCCCCCCCCC)C(O)=O	ADVRBBXWUTVFNX-UHFFFAOYNA-N	Literature based	https://pubs.acs.org/doi/10.1021/acs.biochem.5b00207
	Glycerophospholipids [GP]	Glycerophosphoserines [GP03]	Diacylglycerophosphoserines [GP0301]	PS	Phosphatidylserine	[M+H]+	PS 38:4	PS 18:0_20:4	C44H78NO10P	NL of C3H8NO6P (m/z 627.534, 1000, C41H71O4+)	NL of 18:0 Acyl (m/z 546.242, 10, C26H45NO9P+), NL of 18:0 Acyl and H2O (m/z 528.276, 20, C26H43NO8P+), NL of 20:4 Acyl (m/z 526.305, 30, C24H49NO9P+), NL of 20:4 Acyl and H2O (m/z 508.287, 20, C24H47NO8P+)	CCCCCCCCCCCCCCCCCC(=O)OCC(COP(O)(=O)OCC(N)C(O)=O)OC(=O)CCCCCC\C=C/C\C=C/C\C=C/C\C=C/CC	IULWELDCBXQXED-ZKVKLVECNA-N	Standard confirmed	840035P (Avanti)
	Glycerophospholipids [GP]	Glycerophosphoserines [GP03]	Diacylglycerophosphoserines [GP0301]	PS	Phosphatidylserine	[M+Na]+	PS 38:4	PS 38:4	C44H78NO10P	NL of C3H8NO6P (m/z 649.515, 700, C41H70O4Na+)	-	CCCCCCCCCCCCCCCCCC(=O)OCC(COP(O)(=O)OCC(N)C(O)=O)OC(=O)CCCCCC\C=C/C\C=C/C\C=C/C\C=C/CC	IULWELDCBXQXED-ZKVKLVECNA-N	Standard confirmed	840035P (Avanti)
	Glycerophospholipids [GP]	Glycerophosphoserines [GP03]	Diacylglycerophosphoserines [GP0301]	PS	Phosphatidylserine	[M-H]-	PS 38:4	PS 18:0_20:4	C44H78NO10P	NL of C3H6NO2 (m/z 723.5, 660, C41H72O8P-)	18:0 FA (m/z 283.264, 1000, C18H35O2-), 20:4 FA (m/z 303.231, 250, C20H31O2-)	CCCCCCCCCCCCCCCCCC(=O)OCC(COP(O)(=O)OCC(N)C(O)=O)OC(=O)CCCCCC\C=C/C\C=C/C\C=C/C\C=C/CC	IULWELDCBXQXED-ZKVKLVECNA-N	Standard confirmed	840035P (Avanti)
	Glycerophospholipids [GP]	Glycerophosphoserines [GP03]	Monoacylglycerophosphoserines [GP0305]	LPS	Lysophosphatidylserine	[M-H]-	LPS 18:0	LPS 18:0	C24H48NO9P	NL of C3H6NO2 (m/z 437.264, 390, C21H42O7P-), Phosphoglycerol - H2O (m/z 152.994, 1000, C3H6O5P-)	-	CCCCCCCCCCCCCCCCCC(=O)OCC(O)COP(O)(=O)OCC(N)C(O)=O	ZPDQFUYPBVXUKS-UHFFFAOYNA-N	Standard confirmed	858143P (Avanti)
	Glycerophospholipids [GP]	Other Glycerophospholipids [GP00]		PEtOH	Phosphatidylethanol	[M-H]-	PEtOH 38:4	PEtOH 18:0_20:4	C43H77O8P	Phosphoethanol (m/z 125.000, 20, C2H6O4P-)	18:0 FA (m/z 283.264, 570, C18H35O2-), 20:4 FA (m/z 303.229, 1000, C20H31O2-)	CCCCCCCCCCCCCCCCCC(=O)OCC(COP(O)(=O)OCC)OC(=O)CCCCCC\C=C/C\C=C/C\C=C/C\C=C/CC	JLDTYJXOTVXUJQ-KOAVGRMINA-N	Standard confirmed	840512P (Avanti)
	Glycerophospholipids [GP]	Other Glycerophospholipids [GP00]		PMeOH	Phosphatidylmethanol	[M-H]-	PMeOH 34:2	PMeOH 16:0_18:2	C38H71O8P	Phosphomethanol (m/z 110.981, 30, CH4O4P-)	16:0 FA (m/z 255.234, 470, C16H31O2-), 18:2 FA (m/z 279.232, 1000, C18H31O2-)	CCCCCCCCCCCCCCCC(=O)OCC(COP(O)(=O)OC)OC(=O)CCCCCCC\C=C/C\C=C/CCCCC	PXPCKHZLDQZOMG-DUZKARGPNA-N	Standard confirmed	840419P (Avanti)
	Glycerophospholipids [GP]	Oxidized glycerophospholipids [GP20]	Oxidized glycerophosphocholines [GP2001]	OxPC	Oxidized phosphatidylcholine	[M+HCOO]-, [M+CH3COO]-	PC 34:2;O	PC 16:0_18:2;O	C42H80NO9P	NL of CH3 (m/z 758.538, 1000, C41H77NO9P-)	16:0 FA (m/z 255.232, 230, C16H31O2-), 18:2;O FA (m/z 295.225, 490, C18H31O3-), 18:2;O FA - H2O (m/z 277.212, 50, C18H29O2-)	CCCCCCCCCCCCCCCC(=O)OCC(COP([O-])(=O)OCC[N+](C)(C)C)OC(=O)\C=C\C(O)CCCCCCCC\C=C/CCCC	VLLYGIIMBHAPSK-JKAIQIQLNA-N	Literature based	https://www.mdpi.com/2218-1989/9/6/119
	Glycerophospholipids [GP]	Oxidized glycerophospholipids [GP20]	Oxidized glycerophosphoethanolamines [GP2002]	EtherOxPE	Ether-linked oxidized phosphatidylethanolamine	[M-H]-	PE O-38:6;O	PE O-16:0_22:6;O	C43H76NO8P		22:6;O FA (m/z 343.221, 480, C22H31O3-), 22:6;O FA - H2O (m/z 325.212, 120, C22H29O2-)	CCCCCCCCCCCCCCCCOCC(COP(O)(=O)OCCN)OC(=O)CC\C=C\C\C=C\C\C=C\C\C=C\C\C=C\C\C=C/C(C)O	HKJMQHKNYQEKMV-SLGYAQHNNA-N	Literature based	https://www.mdpi.com/2218-1989/9/6/119
	Glycerophospholipids [GP]	Oxidized glycerophospholipids [GP20]	Oxidized glycerophosphoethanolamines [GP2002]	OxPE	Oxidized phosphatidylethanolamine	[M-H]-	PE 38:4;4O	PE 18:0_20:4;4O	C43H78NO12P	NL of H2O (m/z 812.502, 290, C43H75NO11P-)	18:0 FA (m/z 283.262, 1000, C18H35O2-), 20:4;4O FA (m/z 367.211, 20, C20H31O6-), 20:4;4O FA - H2O (m/z 349.200, 90, C20H29O5-), 20:4;4O FA - 2H2O (m/z 331.192, 210, C20H27O4-)	CCCCCCCCCCCCCCCCCC(=O)OCC(COP(O)(=O)OCCN)OC(=O)C(O)C(O)C\C=C\C\C=C\CC(O)C(O)C\C=C\C\C=C\CC	LHHUSACNSWMTIU-SRDLZFJFNA-N	Literature based	https://www.mdpi.com/2218-1989/9/6/119
	Glycerophospholipids [GP]	Oxidized glycerophospholipids [GP20]	Oxidized glycerophosphoglycerols [GP2007]	OxPG	Oxidized phosphatidylglycerol	[M-H]-	PG 34:3;O	PG 16:0_18:3;O	C40H73O11P	-	16:0 FA (m/z 255.23, 950, C16H31O2-), 18:3;O FA (m/z 293.206, 240, C18H29O3-), 18:3;O FA - H2O (m/z 275.197, 50, C18H27O2-)	CCCCCCCCCCCCCCCC(=O)OCC(COP(O)(=O)OCC(O)CO)OC(=O)CCCCCCC\C=C\C=C\C(O)C\C=C\CC	RZBGVTNKFPGJDA-XBRVMRCINA-N	Literature based	https://www.mdpi.com/2218-1989/9/6/119
	Glycerophospholipids [GP]	Oxidized glycerophospholipids [GP20]	Oxidized glycerophosphoinositols [GP2005]	OxPI	Oxidized phosphatidylinositol	[M-H]-	PI 38:4;4O	PI 18:0_20:4;4O	C47H83O17P	Phosphoinositol - H2O (m/z 241.012, 90, C6H10O8P-), Characteristic fragment (m/z 297.03, 20, C9H14O9P-), NL of H2O (m/z 931.52, 70, C47H80O16P-)	18:0 FA (m/z 283.257, 50, C18H35O2-), 20:4;4O FA (m/z 367.211, 40, C20H31O6-), 20:4;4O FA - H2O (m/z 349.198, 20, C20H29O5-), 20:4;4O FA - 2H2O (m/z 331.187, 20, C20H27O4-)	CCCCCCCCCCCCCCCCCC(=O)OCC(COP(O)(=O)OC1C(O)C(O)C(O)C(O)C1O)OC(=O)C(O)C(O)C\C=C\C\C=C\CC(O)C(O)C\C=C\C\C=C\CC	ADXZLYBYUNIBHT-SRDLZFJFNA-N	Literature based	https://www.mdpi.com/2218-1989/9/6/119
	Glycerophospholipids [GP]	Oxidized glycerophospholipids [GP20]	Oxidized glycerophosphoserines [GP2004]	OxPS	Oxidized phosphatidylserine	[M-H]-	PS 38:4;4O	PS 18:0_20:4;4O	C44H78NO14P	NL of C3H6NO2 (m/z 787.472, 60, C41H72O12P-), NL of H2O (m/z 856.487, 40, C44H75NO13P-)	18:0 FA (m/z 283.264, 1000, C18H35O2-), 20:4;4O FA (m/z 367.200, 20, C20H31O6-), 20:4;4O FA - H2O (m/z 349.205, 40, C20H29O5-), 20:4;4O FA - 2H2O (m/z 331.190, 90, C20H27O4-)	CCCCCCCCCCCCCCCCCC(=O)OCC(COP(O)(=O)OCC(N)C(O)=O)OC(=O)C(O)C(O)C\C=C\C\C=C\CC(O)C(O)C\C=C\C\C=C\CC	TUKILWDEHDLMEO-SRDLZFJFNA-N	Literature based	https://www.mdpi.com/2218-1989/9/6/119
	Glycerophospholipids [GP]			GPNAE	Glycerophospho N-acyl ethanolamine	[M+H]+	GPNAE 16:0	GPNAE 16:0	C21H44NO7P	NL of C3H8O6P (m/z 282.279, 1000, C18H36NO+)	-	O=C(NCCOP(=O)(O)OCC(O)CO)CCCCCCCCCCCCCCC	FIXMIXZULLAMCB-UHFFFAOYSA-N		Manually curated	This study
	Glycerophospholipids [GP]			GPNAE	Glycerophospho N-acyl ethanolamine	[M-H]-	GPNAE 16:0	GPNAE 16:0	C21H44NO7P	Characteristic fragment (m/z 171.0064, 500, C3H8PO6-; m/z 78.9590, 800, PO3-)	-	O=C(NCCOP(=O)(O)OCC(O)CO)CCCCCCCCCCCCCCC	FIXMIXZULLAMCB-UHFFFAOYSA-N		Manually curated	This study
	Prenol Lipids [PR]	Isoprenoids [PR01]	Retinoids [PR0109]	VAE	Vitamin A fatty acid ester	[M+H]+, [M+Na]+	VAE 18:0	VAE 18:0	C38H64O2	Characteristic fragment 1 (m/z 269.23, 1000, C20H29+), Characteristic fragment 2 (m/z 119.083, 110, C9H11+)	-	CCCCCCCCCCCCCCCCCC(=O)OCC=C(C)C=CC=C(C)C=CC1=C(C)CCCC1(C)C	YNGACJMSLZMZOX-UHFFFAOYSA-N	Literature based	https://www.sciencedirect.com/science/article/abs/pii/S1388198116303006
	Prenol Lipids [PR]	Quinones and hydroquinones [PR02]	Ubiquinones [PR0201]	CoQ	Coenzyme Q	[M+H]+	CoQ10	CoQ10	C59H90O4	Characteristic fragment (m/z 197.083, 1000, C10H13O4+)	-	COC1=C(OC)C(=O)C(CC=C(C)CCC=C(C)CCC=C(C)CCC=C(C)CCC=C(C)CCC=C(C)CCC=C(C)CCC=C(C)CCC=C(C)CCC=C(C)C)=C(C)C1=O	ACTIUHUUMQJHFO-UHFFFAOYSA-N	Standard confirmed	07386 (Sigma)
	Prenol Lipids [PR]	Quinones and hydroquinones [PR02]	Vitamin E [PR0202]	Vitamin E	Vitamin E	[M-H]-, [M+HCOO]-, [M+CH3COO]-	Tocopherol	Tocopherol	C29H50O2	Characteristic fragment (m/z 163.072, 1000, C10H11O2-)	-	CC(C)CCCC(C)CCCC(C)CCCC1(C)CCC2=C(C)C(O)=C(C)C(C)=C2O1	GVJHHUAWPYXKBD-UHFFFAOYNA-N	Standard confirmed	V-020-1ML (Sigma)
	Sphingolipids [SP]	Acidic glycosphingolipids [SP06]	Gangliosides [SP0601]	GD1a	Ganglioside GD1a	[M+2H]2+, [M+2NH4]2+	GD1a 36:1;2O	GD1a 18:1;2O/18:0	C84H148N4O39	Characteristic fragment (m/z 657.235, 300, C25H41N2O18+)	SPB 18:1;O2 -H2O (m/z 282.294, 120, C18H36NO+), SPB 18:1;O2 -2H2O (m/z 264.261, 430, C18H34N+)	O=C(O)C1(OC2C(O)C(OC(CO)C2O)OC3C(O)C(OC(OC4C(OC(OC5C(O)C(O)C(OCC(NC(=O)CCCCCCCCCCCCCCCCC)C(O)C=CCCCCCCCCCCCCC)OC5CO)C(O)C4OC6(OC(C(O)C(O)CO)C(NC(=O)C)C(O)C6)C(=O)O)CO)C3NC(=O)C)CO)OC(C(O)C(O)CO)C(NC(=O)C)C(O)C1	RXIWRIRPTSKUTD-UHFFFAOYSA-N		https://avantilipids.com/product/860055	This study
	Sphingolipids [SP]	Acidic glycosphingolipids [SP06]	Gangliosides [SP0601]	GD1a	Ganglioside GD1a	[M-H]-, [M-2H]2-	GD1a 36:1;2O		C84H148N4O39	Characteristic fragment (m/z 290.087, 100, C11H16NO8-)	-	O=C(O)C1(OC2C(O)C(OC(CO)C2O)OC3C(O)C(OC(OC4C(OC(OC5C(O)C(O)C(OCC(NC(=O)CCCCCCCCCCCCCCCCC)C(O)C=CCCCCCCCCCCCCC)OC5CO)C(O)C4OC6(OC(C(O)C(O)CO)C(NC(=O)C)C(O)C6)C(=O)O)CO)C3NC(=O)C)CO)OC(C(O)C(O)CO)C(NC(=O)C)C(O)C1	RXIWRIRPTSKUTD-UHFFFAOYSA-N		https://avantilipids.com/product/860055	This study
	Sphingolipids [SP]	Acidic glycosphingolipids [SP06]	Gangliosides [SP0601]	GD1b	Ganglioside GD1b	[M+2H]2+, [M+2NH4]2+	GD1b 36:1;2O	GD1b 18:1;2O/18:0	C84H148N4O39	Characteristic fragment (m/z 366.139, 700, C14H24NO10+)	SPB 18:1;O2 -H2O (m/z 282.294, 120, C18H36NO+), SPB 18:1;O2 -2H2O (m/z 264.261, 430, C18H34N+)	O=C(O)C1(OC(CO)C(O)C2OC(OC3C(O)C(OC(CO)C3OC4OC(CO)C(O)C(OC5OC(CO)C(O)C(O)C5O)C4NC(=O)C)OC6C(O)C(O)C(OCC(NC(=O)CCCCCCCCCCCCCCCCC)C(O)C=CCCCCCCCCCCCCC)OC6CO)(C(=O)O)CC(O)C2NC(=O)C)OC(C(O)C(O)CO)C(NC(=O)C)C(O)C1	UXKZRIMBSGILRR-UHFFFAOYSA-N		https://avantilipids.com/product/860056	This study
	Sphingolipids [SP]	Acidic glycosphingolipids [SP06]	Gangliosides [SP0601]	GD1b	Ganglioside GD1b	[M-H]-, [M-2H]2-	GD1b 36:1;2O		C84H148N4O39	Characteristic fragment (m/z 290.087, 100, C11H16NO8-)	-	O=C(O)C1(OC(CO)C(O)C2OC(OC3C(O)C(OC(CO)C3OC4OC(CO)C(O)C(OC5OC(CO)C(O)C(O)C5O)C4NC(=O)C)OC6C(O)C(O)C(OCC(NC(=O)CCCCCCCCCCCCCCCCC)C(O)C=CCCCCCCCCCCCCC)OC6CO)(C(=O)O)CC(O)C2NC(=O)C)OC(C(O)C(O)CO)C(NC(=O)C)C(O)C1	UXKZRIMBSGILRR-UHFFFAOYSA-N		https://avantilipids.com/product/860056	This study
	Sphingolipids [SP]	Acidic glycosphingolipids [SP06]	Gangliosides [SP0601]	GD2	Ganglioside GD2	[M-H]-, [M-2H]2-	GD2 36:1;2O		C79H139N3O34	Characteristic fragment (m/z 290.087, 200, C11H16NO8-)	-	CCCCCCCCCCCCCCCCCC(=O)NC(COC1OC(CO)C(OC2OC(CO)C(OC3OC(CO)C(O)C(O)C3NC(C)=O)C(OC3(CC(O)C(NC(C)=O)C(O3)C(O)C(CO)OC3(CC(O)C(NC(C)=O)C(O3)C(O)C(O)CO)C(O)=O)C(O)=O)C2O)C(O)C1O)C(O)C=CCCCCCCCCCCCCC	CXQCLLQQYTUUKJ-UHFFFAOYNA-N		https://pubmed.ncbi.nlm.nih.gov/24680754/	This study
	Sphingolipids [SP]	Acidic glycosphingolipids [SP06]	Gangliosides [SP0601]	GD3	Ganglioside GD3	[M-H]-, [M-2H]2-	GD3 36:1;2O		C70H125N3O29	Characteristic fragment (m/z 290.087, 1000, C11H16NO8-)	-	CCCCCCCCCCCCCCCCCC(=O)NC(COC1OC(CO)C(OC2OC(CO)C(O)C(OC3(CC(O)C(NC(C)=O)C(O3)C(O)C(O)COC3(CC(O)C(NC(C)=O)C(O3)C(O)C(O)CO)C(O)=O)C(O)=O)C2O)C(O)C1O)C(O)C=CCCCCCCCCCCCCC	AXBJMMUOFICXEP-UHFFFAOYNA-N		https://avantilipids.com/product/860060	This study
	Sphingolipids [SP]	Acidic glycosphingolipids [SP06]	Gangliosides [SP0601]	GM1	Ganglioside GM1	[M+NH4]+, [M+2H]2+, [M+2NH4]2+	GM1 36:1;2O	GM1 18:1;2O/18:0	C73H131N3O31	Characteristic fragment (m/z 366.139, 600, C14H24NO10+)	SPB 18:1;O2 -H2O (m/z 282.294, 120, C18H36NO+), SPB 18:1;O2 -2H2O (m/z 264.261, 430, C18H34N+)	O=C(O)C1(OC2C(O)C(OC(CO)C2OC3OC(CO)C(O)C(OC4OC(CO)C(O)C(O)C4O)C3NC(=O)C)OC5C(O)C(O)C(OCC(NC(=O)CCCCCCCCCCCCCCCCC)C(O)C=CCCCCCCCCCCCCC)OC5CO)OC(C(O)C(O)CO)C(NC(=O)C)C(O)C1	QPJBWNIQKHGLAU-UHFFFAOYSA-N		https://avantilipids.com/product/860065	This study
	Sphingolipids [SP]	Acidic glycosphingolipids [SP06]	Gangliosides [SP0601]	GM1	Ganglioside GM1	[M-H]-, [M-2H]2-	GM1 36:1;2O		C73H131N3O31	Characteristic fragment (m/z 290.087, 1000, C11H16NO8-)	-	O=C(O)C1(OC2C(O)C(OC(CO)C2OC3OC(CO)C(O)C(OC4OC(CO)C(O)C(O)C4O)C3NC(=O)C)OC5C(O)C(O)C(OCC(NC(=O)CCCCCCCCCCCCCCCCC)C(O)C=CCCCCCCCCCCCCC)OC5CO)OC(C(O)C(O)CO)C(NC(=O)C)C(O)C1	QPJBWNIQKHGLAU-UHFFFAOYSA-N		https://avantilipids.com/product/860065	This study
	Sphingolipids [SP]	Acidic glycosphingolipids [SP06]	Gangliosides [SP0601]	GM3	Ganglioside GM3	[M+H]+, [M+NH4]+	GM3 36:1;2O	GM3 18:1;2O/18:0	C59H108N2O21	NL of H2O (m/z 1163.734, 740, C59H107N2O20+), NL of H2O and C23H37NO18 (m/z 548.535, 1000, C36H70NO2+)	SPB 18:1;O2 -H2O (m/z 282.294, 120, C18H36NO+), SPB 18:1;O2 -2H2O (m/z 264.261, 430, C18H34N+)	CCCCCCCCCCCCCCCCCC(=O)NC(COC1OC(CO)C(OC2OC(CO)C(O)C(OC3(CC(O)C(NC(C)=O)C(O3)C(O)C(O)CO)C(O)=O)C2O)C(O)C1O)C(O)\C=C\CCCCCCCCCCCCC	UIKPUUZBQYTDRX-NHQGMKOONA-N	Standard confirmed	860074W (Avanti)
	Sphingolipids [SP]	Acidic glycosphingolipids [SP06]	Gangliosides [SP0601]	GM3	Ganglioside GM3	[M-H]-	GM3 34:1;2O	GM3 34:1;2O	C57H104N2O21	Characteristic fragment (m/z 290.087, 150, C11H16NO8-)	-	CCCCCCCCCCCCCCCC(O)C(COC1OC(CO)C(OC2OC(CO)C(O)C(OC3(CC(O)C(NC(C)=O)C(O3)C(O)C(O)CO)C(O)=O)C2O)C(O)C1O)NC(=O)CCCCCCCCC\C=C/CCCC	ZLSGXCMTLBZHOL-QBFSEMIENA-N	Standard confirmed	860074W (Avanti)
	Sphingolipids [SP]	Acidic glycosphingolipids [SP06]	Gangliosides [SP0601]	GQ1b	Ganglioside GQ1b	[M+2NH4]2+	GQ1b 36:1;2O	GQ1b 18:1;2O/18:0	C106H182N6O55	Characteristic fragment (m/z 657.235, 300, C25H41N2O18+; m/z 366.139, 250, C14H24NO10+)	SPB 18:1;O2 -H2O (m/z 282.294, 120, C18H36NO+), SPB 18:1;O2 -2H2O (m/z 264.261, 430, C18H34N+)	O=C(O)C1(OC(CO)C(O)C2OC(OC3C(O)C(OC(CO)C3O)OC4C(O)C(OC(OC5C(OC(OC6C(O)C(O)C(OCC(NC(=O)CCCCCCCCCCCCCCCCC)C(O)C=CCCCCCCCCCCCCC)OC6CO)C(O)C5OC7(OC(C(O)C(OC8(OC(C(O)C(O)CO)C(NC(=O)C)C(O)C8)C(=O)O)CO)C(NC(=O)C)C(O)C7)C(=O)O)CO)C4NC(=O)C)CO)(C(=O)O)CC(O)C2NC(=O)C)OC(C(O)C(O)CO)C(NC(=O)C)C(O)C1	LRUVGSYWSFDCIT-UHFFFAOYSA-N		https://avantilipids.com/product/860086	This study
	Sphingolipids [SP]	Acidic glycosphingolipids [SP06]	Gangliosides [SP0601]	GQ1b	Ganglioside GQ1b	[M-H]-, [M-2H]2-	GQ1b 36:1;2O		C106H182N6O55	Characteristic fragment (m/z 290.087, 1000, C11H16NO8-; m/z 581.184, 50, C22H33N2O16-)	-	O=C(O)C1(OC(CO)C(O)C2OC(OC3C(O)C(OC(CO)C3O)OC4C(O)C(OC(OC5C(OC(OC6C(O)C(O)C(OCC(NC(=O)CCCCCCCCCCCCCCCCC)C(O)C=CCCCCCCCCCCCCC)OC6CO)C(O)C5OC7(OC(C(O)C(OC8(OC(C(O)C(O)CO)C(NC(=O)C)C(O)C8)C(=O)O)CO)C(NC(=O)C)C(O)C7)C(=O)O)CO)C4NC(=O)C)CO)(C(=O)O)CC(O)C2NC(=O)C)OC(C(O)C(O)CO)C(NC(=O)C)C(O)C1	LRUVGSYWSFDCIT-UHFFFAOYSA-N		https://avantilipids.com/product/860086	This study
	Sphingolipids [SP]	Acidic glycosphingolipids [SP06]	Gangliosides [SP0601]	GT1b	Ganglioside GT1b	[M+2H]2+, [M+2NH4]2+	GT1b 36:1;2O	GT1b 18:1;2O/18:0	C95H165N5O47	Characteristic fragment (m/z 657.235, 300, C25H41N2O18+; m/z 366.139, 200, C14H24NO10+)	SPB 18:1;O2 -H2O (m/z 282.294, 120, C18H36NO+), SPB 18:1;O2 -2H2O (m/z 264.261, 430, C18H34N+)	O=C(O)C1(OC(CO)C(O)C2OC(OC3C(O)C(OC(CO)C3OC4OC(CO)C(O)C(OC5OC(CO)C(O)C(OC6(OC(C(O)C(O)CO)C(NC(=O)C)C(O)C6)C(=O)O)C5O)C4NC(=O)C)OC7C(O)C(O)C(OCC(NC(=O)CCCCCCCCCCCCCCCCC)C(O)C=CCCCCCCCCCCCCC)OC7CO)(C(=O)O)CC(O)C2NC(=O)C)OC(C(O)C(O)CO)C(NC(=O)C)C(O)C1	LEZNRPFLOGYEIO-UHFFFAOYSA-N		https://avantilipids.com/product/860059	This study
	Sphingolipids [SP]	Acidic glycosphingolipids [SP06]	Gangliosides [SP0601]	GT1b	Ganglioside GT1b	[M-H]-, [M-2H]2-	GT1b 36:1;2O		C95H165N5O47	Characteristic fragment (m/z 290.087, 1000, C11H16NO8-; m/z 581.184, 50, C22H33N2O16-)	-	O=C(O)C1(OC(CO)C(O)C2OC(OC3C(O)C(OC(CO)C3OC4OC(CO)C(O)C(OC5OC(CO)C(O)C(OC6(OC(C(O)C(O)CO)C(NC(=O)C)C(O)C6)C(=O)O)C5O)C4NC(=O)C)OC7C(O)C(O)C(OCC(NC(=O)CCCCCCCCCCCCCCCCC)C(O)C=CCCCCCCCCCCCCC)OC7CO)(C(=O)O)CC(O)C2NC(=O)C)OC(C(O)C(O)CO)C(NC(=O)C)C(O)C1	LEZNRPFLOGYEIO-UHFFFAOYSA-N		https://avantilipids.com/product/860059	This study
	Sphingolipids [SP]	Acidic glycosphingolipids [SP06]	Sulfoglycosphingolipids (sulfatides) [SP0602]	SHexCer	Sulfatide	[M+H]+	SHexCer 36:1;2O	SHexCer 18:1;2O/18:0	C42H81NO11S	NL of H2SO4 (m/z 710.608, 910, C42H80NO7+), NL of H2SO4 and C6H10O5 (m/z 548.526, 720, C36H70NO2+)	SPB 18:1;O2 -H2O (m/z 282.279, 280, C18H36NO+), SPB 18:1;O2 -2H2O (m/z 264.263, 1000, C18H34N+), SPB 18:1;O2 -CH4O2 (m/z 252.271, 280, C17H34N+),	CCCCCCCCCCCCCCCCCC(=O)NC(COC1OC(CO)C(O)C(OS(O)(=O)=O)C1O)C(O)\C=C\CCCCCCCCCCCCC	GQQZXRPXBDJABR-OWWNRXNENA-N	Standard confirmed	860578P (Avanti)
	Sphingolipids [SP]	Acidic glycosphingolipids [SP06]	Sulfoglycosphingolipids (sulfatides) [SP0602]	SHexCer	Sulfatide	[M-H]-	SHexCer 38:1;2O		C44H85NO11S	Hydrogensulfate (m/z 96.956, 3, HSO4-)	-	CCCCCCCCCCCCCCCCCCCC(=O)NC(COC1OC(CO)C(O)C(OS(O)(=O)=O)C1O)C(O)\C=C\CCCCCCCCCCCCC	AURCBSWGPREGRQ-QOSDPKFLNA-N	Standard confirmed	860578P (Avanti)
	Sphingolipids [SP]	Acidic glycosphingolipids [SP06]	Sulfoglycosphingolipids (sulfatides) [SP0602]	SHexCer+O	Oxidized sulfatide	[M+H]+	SHexCer 36:1;3O	SHexCer 18:1;2O/18:0;O	C42H81NO12S	NL of H2SO4 (m/z 726.562, 570, C42H80NO8+), NL of H2SO4 and C6H10O5 (m/z 564.522, 370, C36H70NO3+)	SPB 18:1;O2 -H2O (not observed), SPB 18:1;O2 -2H2O (m/z 264.277, 1000, C18H34N+), SPB 18:1;O2 -CH4O2 (not observed)	CCCCCCCCCCCCCCCCC(O)C(=O)NC(COC1OC(CO)C(O)C(OS(O)(=O)=O)C1O)C(O)\C=C\CCCCCCCCCCCCC	QAXLTFVHNINRAJ-SJCQXOIGNA-N	Literature based	https://onlinelibrary.wiley.com/doi/book/10.1002/9781119085263
	Sphingolipids [SP]	Acidic glycosphingolipids [SP06]	Sulfoglycosphingolipids (sulfatides) [SP0602]	SHexCer+O	Oxidized sulfatide	[M-H]-	SHexCer 42:2;3O		C48H91NO12S	Hydrogensulfate (m/z 96.958, 3, HSO4-)	-	CCCCCCCCCCCCCCCCCCC(O)C(=O)NC(COC1OC(CO)C(O)C(OS(O)(=O)=O)C1O)C(O)\C=C\CCC\C=C\CCCCCCCCCCCC	NXJFBBLNIUECHV-WQMGGPGFNA-N	Literature based	https://onlinelibrary.wiley.com/doi/book/10.1002/9781119085263
	Sphingolipids [SP]	Acidic glycosphingolipids [SP06]		NGcGM3	NGcGM3	[M+NH4]+	NGcGM3 42:2;2O	NGcGM3 18:1;2O/24:1	C65H118N2O22	NL of C11H16NO9 and H2O (m/z 954.724, 300, C54H100NO12+), NL of C11H16NO9 and H2O and Hexose (m/z 792.671, 500, C48H90NO7+)	SPB 18:1;O2 -H2O (m/z 282.294, 120, C18H36NO+), SPB 18:1;O2 -2H2O (m/z 264.261, 430, C18H34N+)	CCCCCCCCCCCCCC=CC(O)C(COC1OC(CO)C(OC2OC(CO)C(O)C(OC3(CC(O)C(N=C(O)CO)C(O3)C(O)C(O)CO)C(O)=O)C2O)C(O)C1O)NC(=O)CCCCCCCCCCCCCC=CCCCCCCCC	DWKZKSKHAKJJFY-UHFFFAOYNA-N		https://avantilipids.com/product/860064	This study
	Sphingolipids [SP]	Acidic glycosphingolipids [SP06]		NGcGM3	NGcGM3	[M-H]-, [M-2H]2-	NGcGM3 42:2;2O		C65H118N2O22	Characteristic fragment (m/z 306.083, 5, C11H16NO9-)	-	CCCCCCCCCCCCCC=CC(O)C(COC1OC(CO)C(OC2OC(CO)C(O)C(OC3(CC(O)C(N=C(O)CO)C(O3)C(O)C(O)CO)C(O)=O)C2O)C(O)C1O)NC(=O)CCCCCCCCCCCCCC=CCCCCCCCC	DWKZKSKHAKJJFY-UHFFFAOYNA-N		https://avantilipids.com/product/860064	This study
	Sphingolipids [SP]	Ceramides [SP02]	Acylceramides [SP0204]	Cer-EBDS	Ceramide Esterified beta-hydroxy fatty acid-dihydrosphingosine	[M+HCOO]-, [M+CH3COO]-	Cer 50:1;4O	Cer 18:0;2O/17:0;(3OH)(FA 15:0)	C50H99NO5	-	SPB 18:0;O2 +C2H2O (m/z 342.302, 60, C20H40NO3-) 15:0 FA (m/z 241.219, 1000, C15H29O2-), NL of 15:0 Acyl and H2O (m/z 550.523, 90, C35H68NO3-)	CCCCCCCCCCCCCCCC(O)C(CO)NC(=O)CC(CCCCCCCCCCCCCC)OC(=O)CCCCCCCCCCCCCC	QEKDEBOPACJDST-UHFFFAOYNA-N	Structure predicted	NA
	Sphingolipids [SP]	Ceramides [SP02]	Acylceramides [SP0204]	Cer-EODS	Ceramide Esterified omega-hydroxy fatty acid-dihydrosphingosine	[M-H]-, [M+HCOO]-, [M+CH3COO]-	Cer 49:1;4O	Cer 18:0;2O/16:0;O(FA 15:0)	C49H97NO5	-	15:0 FA (m/z 241.217, 1000, C15H29O2-), NL of 15:0 Acyl (m/z 554.511, 10, C34H68NO4-), Acyl amide (without omega acyl chain) (not observed)	CCCCCCCCCCCCCCCCCC(O)C(CO)NC(=O)CCCCCCCCCCCCCOC(=O)CCCCCCCCCCCCCC	XPLHCCOOXCIDKL-UHFFFAOYNA-N	Literature based	https://jcheminf.biomedcentral.com/articles/10.1186/s13321-017-0205-3
	Sphingolipids [SP]	Ceramides [SP02]	Acylceramides [SP0204]	Cer-EOS	Ceramide Esterified omega-hydroxy fatty acid-sphingosine	[M+H]+	Cer 70:4;4O	Cer 18:1;2O/52:3;2O	C70H133NO5	NL of H2O (m/z 1051.024, 1000, C70H132NO4+)	SPB 18:1;O2 -H2O (m/z 282.282, 130, C18H36NO+), SPB 18:1;O2 -2H2O (m/z 264.268, 590, C18H34N+), SPB 18:1;O2 -CH4O2 (m/z 252.263, 190, C17H34N+)	CCCCCCCCCCCCC\C=C\C(O)C(CO)NC(=O)CCCCCCCCCCCCCCCCCCCCCCCCCCCCCCCCCOC(=O)CCCCCCC\C=C/C\C=C/CCCCC	WTOPSPXQQJWZJF-APUKNJKBNA-N	Literature based	https://jcheminf.biomedcentral.com/articles/10.1186/s13321-017-0205-3
	Sphingolipids [SP]	Ceramides [SP02]	Acylceramides [SP0204]	Cer-EOS	Ceramide Esterified omega-hydroxy fatty acid-sphingosine	[M-H]-, [M+HCOO]-, [M+CH3COO]-	Cer 68:3;4O	Cer 18:1;2O/32:0;O(FA 18:2)	C68H129NO5	-	32:0 Acyl amide (without 18:2 FA) (m/z 494.479, 4, C32H64NO2-), 18:2 FA (m/z 279.227, 1000, C18H31O2-), NL of 18:2 FA (m/z 776.738, 50, C50H98NO4-)	CCCCCCCCCCCCC\C=C\C(O)C(CO)NC(=O)CCCCCCCCCCCCCCCCCCCCCCCCCCCCCCCOC(=O)CCCCCCC\C=C/C\C=C/CCCCC	NKZDGPMKCOVGRH-FHDUZSEONA-N	Literature based	https://jcheminf.biomedcentral.com/articles/10.1186/s13321-017-0205-3
	Sphingolipids [SP]	Ceramides [SP02]	Ceramide 1-phosphates [SP0205]	CerP	Ceramide 1-phosphates	[M+H]+	CerP 30:1;2O	CerP 18:1;2O/12:0	C30H60NO6P	NL of H3PO4 (m/z 464.444, 150, C30H58NO2+), NL of H3PO4 and H2O (m/z 446.445, 200, C30H56NO+)	SPB 18:1;O2 -2H2O (m/z 264.265, 1000, C18H34N+)	CCCCCCCCCCCCC\C=C\[C@@H](O)[C@H](COP(O)(O)=O)NC(=O)CCCCCCCCCCC	KXEMZGPJXBKYJP-VARSQMIESA-N	Standard confirmed	LM6002-1EA (Avanti)
	Sphingolipids [SP]	Ceramides [SP02]	Ceramide 1-phosphates [SP0205]	CerP	Ceramide 1-phosphates	[M-H]-	CerP 30:1;2O	CerP 18:1;2O/12:0	C30H60NO6P	(m/z 78.96, 550, PO3-), (m/z 96.97, 150, H2PO4-)	NL of 12:0 Acyl (m/z 378.237, 10, C18H37NO5P-), NL of 12:0 Acyl and H2O (m/z 360.209, 10, C18H35NO4P-)	CCCCCCCCCCCCC\C=C\[C@@H](O)[C@H](COP(O)(O)=O)NC(=O)CCCCCCCCCCC	KXEMZGPJXBKYJP-VARSQMIESA-N	Standard confirmed	LM6002-1EA (Avanti)
	Sphingolipids [SP]	Ceramides [SP02]	N-acyl-4-hydroxysphinganines (phytoceramides) [SP0203]	Cer-AP	Ceramide alpha-hydroxy fatty acid-phytospingosine	[M+H]+	Cer 42:1;4O	Cer 18:1;3O/24:0;(2OH)	C42H83NO5	NL of H2O (m/z 664.625, 1000, C42H82NO4+), NL of 2H2O (m/z 646.619, 350, C42H80NO3+)	SPB 18:1;O3 (m/z 316.281, 70, C18H38NO3+), SPB 18:1;O3 -H2O (m/z 298.27, 320, C18H36NO2+), SPB 18:1;O3 -3H2O (m/z 262.253, 890, C18H32N+)	CCCCCCCCCCCCCCCCCCCCCCC(O)C(=O)NC(CO)C(O)C(O)CCC\C=C\CCCCCCCCC	BIVGPKIBTGZJJH-ORIPQNMZNA-N	Standard confirmed	860925P (Avanti)
	Sphingolipids [SP]	Ceramides [SP02]	N-acyl-4-hydroxysphinganines (phytoceramides) [SP0203]	Cer-AP	Ceramide alpha-hydroxy fatty acid-phytospingosine	[M-H]-, [M+HCOO]-, [M+CH3COO]-	Cer 38:0;4O	Cer 18:0;3O/20:0;(2OH)	C38H77NO5	-	20:0;O Acyl - CH2O (m/z 281.288, 80, C19H37O-), 20:0;O Acyl + O (m/z 327.292, 340, C20H39O3-), 20:0;O Acyl + C3H5NO (m/z 382.332, 130, C23H44NO3-)	CCCCCCCCCCCCCCCCCCC(O)C(=O)NC(CO)C(O)C(O)CCCCCCCCCCCCCC	RYCCNLKFNBMCIU-UHFFFAOYNA-N	Standard confirmed	860925P (Avanti)
	Sphingolipids [SP]	Ceramides [SP02]	N-acyl-4-hydroxysphinganines (phytoceramides) [SP0203]	Cer-NP	Ceramide non-hydroxyfatty acid-phytospingosine	[M-H]-, [M+HCOO]-, [M+CH3COO]-	Cer 34:0;3O	Cer 18:0;3O/16:0	C34H69NO4	NL of H2O (m/z 536.5, 50, C34H66NO3-), NL of 2H2O (m/z 518.534, 10, C34H64NO2-)	16:0 Acyl + C3H5NO (m/z 310.271, 390, C19H36NO2-), 16:0 Acyl amide (m/z 254.249, 190, C16H32NO-), SPB 18:0;O2 - CH7NO (m/z 267.232, 350, C17H31O2-)	CCCCCCCCCCCCCCCC(=O)NC(CO)C(O)C(O)CCCCCCCCCCCCCC	IVBULNXGVIHEKN-UHFFFAOYNA-N	Standard confirmed	860724P (Avanti)
	Sphingolipids [SP]	Ceramides [SP02]	N-acylsphinganines (dihydroceramides) [SP0202]	Cer-ADS	Ceramide alpha-hydroxy fatty acid-dihydrosphingosine	[M-H]-, [M+HCOO]-, [M+CH3COO]-	Cer 34:0;3O	Cer 18:0;2O/16:0;(2OH)	C34H69NO4	NL of CH4O2 (m/z 506.478, 30, C33H64NO2-) NL of H2O (m/z 536.501, 70, C34H66NO3-)	SPB 18:0;O2 (m/z 300.28, 90, C18H38NO2-), SPB 18:0;O2 - H2O (m/z 282.28, 90, C18H36NO-), SPB 18:0;O2 - C2H7NO (m/z 239.233, 90, C16H31O-), 16:0;O Acyl - CH2O (m/z 225.217, 120, C15H29O-), 16:0;O Acyl - 2H (m/z 253.209, 70, C16H29O2-)	CCCCCCCCCCCCCCCC(O)C(CO)NC(=O)C(O)CCCCCCCCCCCCCC	NQXMVCBJWMTLGK-UHFFFAOYNA-N	Literature based	https://jcheminf.biomedcentral.com/articles/10.1186/s13321-017-0205-3
	Sphingolipids [SP]	Ceramides [SP02]	N-acylsphinganines (dihydroceramides) [SP0202]	Cer-BDS	Ceramide beta-hydroxy fatty acid-dihydrosphingosine	[M-H]-, [M+HCOO]-, [M+CH3COO]-	Cer 34:0;3O	Cer 18:0;2O/16:0;(3OH)	C34H69NO4	-	SPB 18:0;O2 + C2H2O (m/z 342.303, 1000, C20H40NO3-), SPB 18:0;O2 + C2H2O - CH4O (m/z 310.274, 350, C19H36NO2-), SPB 18:0;O2 (m/z 300.292, 90, C18H38NO2-), SPB 18:0;O2 - C2H7NO (m/z 239.238, 270, C16H31O-)	CCCCCCCCCCCCCCCC(O)C(CO)NC(=O)CC(O)CCCCCCCCCCCCC	NANAYHZEAHRCME-UHFFFAOYNA-N	Literature based	https://jcheminf.biomedcentral.com/articles/10.1186/s13321-017-0205-3
	Sphingolipids [SP]	Ceramides [SP02]	N-acylsphinganines (dihydroceramides) [SP0202]	Cer-NDS	Ceramide non-hydroxyfatty acid-dihydrosphingosine	[M+H]+	Cer 44:0;2O	Cer 18:0;2O/26:0	C44H89NO3	NL of H2O (m/z 662.679, 1000, C44H88NO2+)	SPB 18:0;O2 -H2O (m/z 284.299, 390, C18H38NO+), SPB 18:0;O2 -2H2O (m/z 266.289, 290, C18H36N+), SPB 18:0;O2 -CH4O2 (m/z 254.281, 60, C17H34N+)	CCCCCCCCCCCCCCCCCCCCCCCCCC(=O)NC(CO)C(O)CCCCCCCCCCCCCCC	NWERZHCPHDHUMO-UHFFFAOYNA-N	Literature based	https://jcheminf.biomedcentral.com/articles/10.1186/s13321-017-0205-3
	Sphingolipids [SP]	Ceramides [SP02]	N-acylsphinganines (dihydroceramides) [SP0202]	Cer-NDS	Ceramide non-hydroxyfatty acid-dihydrosphingosine	[M-H]-, [M+HCOO]-, [M+CH3COO]-	Cer 34:0;2O	Cer 18:0;2O/16:0	C34H69NO3	NL of CH4O (m/z 506.486, 250, C33H64NO2-), NL of CH4O2 (m/z 490.489, 200, C33H64NO-)	16:0 Acyl + C2H3N (m/z 280.264, 610, C18H34NO-), SPB 18:0;O2 - C2H7NO (m/z 239.233, 120, C16H31O-), 16:0 Acyl - 2H (m/z 237.223, 190, C16H29O-)	CCCCCCCCCCCCCCCC(O)C(CO)NC(=O)CCCCCCCCCCCCCCC	GCGTXOVNNFGTPQ-UHFFFAOYNA-N	Literature based	https://jcheminf.biomedcentral.com/articles/10.1186/s13321-017-0205-3
	Sphingolipids [SP]	Ceramides [SP02]	N-acylsphingosines (ceramides) [SP0201]	Cer-AS	Ceramide alpha-hydroxy fatty acid-sphingosine	[M-H]-, [M+HCOO]-, [M+CH3COO]-	Cer 34:1;3O	Cer 18:1;2O/16:0;(2OH)	C34H67NO4	NL of CH4O2 (m/z 504.472, 90, C33H62NO2-), NL of H2O (m/z 534.467, 40, C34H64NO3-)	d18:1 Sph - H2O (m/z 280.267, 50, C18H34NO-), d18:1 Sph - C2H7NO (m/z 237.225, 50, C16H29O-), 16:0+O Acyl - CH2O (m/z 225.222, 190, C15H29O-), 16:0+O Acyl - 2H (m/z 253.223, 80, C16H29O2-)	CCCCCCCCCCCCCCC(O)C(=O)NC(CO)C(O)\C=C\CCCCCCCCCCCCC	YWZGQPJRQXHVQX-BYCLXTJYNA-N	Standard confirmed	860826P (Avanti)
	Sphingolipids [SP]	Ceramides [SP02]	N-acylsphingosines (ceramides) [SP0201]	Cer-BS	Ceramide beta-hydroxy fatty acid-sphingosine	[M-H]-, [M+HCOO]-, [M+CH3COO]-	Cer 40:1;3O	Cer 16:1;2O/24:0;(3OH)	C40H79NO4	-	SPB 16:1;O2 - C2H7NO (m/z 209.186, 270, C14H25O-), SPB 16:1;O2 + C2H2O (m/z 312.246, 1000, C18H34NO3-), SPB 16:1;O2 + C2H2O - CH2O (m/z 282.236, 250, C17H30NO2-)	CCCCCCCCCCCCCCCCCCCCCC(O)CC(=O)NC(CO)C(O)\C=C\CCCCCCCCCCC	GBNDEDTYBNPHFO-NWBJSICCNA-N	Literature based	https://jcheminf.biomedcentral.com/articles/10.1186/s13321-017-0205-3
	Sphingolipids [SP]	Ceramides [SP02]	N-acylsphingosines (ceramides) [SP0201]	Cer-HDS	Ceramide hydroxy fatty acid-dihydrosphingosine	[M+H]+	Cer 36:0;3O	Cer 19:0;2O/17:0;O	C36H73NO4	-	SPB 19:0;O2 -H2O (m/z 298.308, 590, C19H40NO+), SPB 19:0;O2 -2H2O (m/z 280.302, 390, C19H38N+), SPB 19:0;O2 -CH4O2 (m/z 268.265, 160, C18H38N+)	CCCCCCCCCCCCCCCCC(O)C(CO)NC(=O)C(O)CCCCCCCCCCCCCCC	LEOLKNSQMOJDOF-UHFFFAOYNA-N	Literature based	https://jcheminf.biomedcentral.com/articles/10.1186/s13321-017-0205-3
	Sphingolipids [SP]	Ceramides [SP02]	N-acylsphingosines (ceramides) [SP0201]	Cer-HDS	Ceramide hydroxy fatty acid-dihydrosphingosine	[M-H]-, [M+HCOO]-, [M+CH3COO]-	Cer 38:0;3O	Cer 18:0;2O/20:0;O	C38H77NO4	-	(case of cannot determine OH position at Cer-ADS, Cer-BDS)	CCCCCCCCCCCCCCCCCCC(O)C(=O)NC(CO)C(O)CCCCCCCCCCCCCCC	QZPHNIHBKGRHTP-UHFFFAOYNA-N	Literature based	https://jcheminf.biomedcentral.com/articles/10.1186/s13321-017-0205-3
	Sphingolipids [SP]	Ceramides [SP02]	N-acylsphingosines (ceramides) [SP0201]	Cer-HS	Ceramide hydroxy fatty acid-sphingosine	[M+H]+	Cer 44:1;3O	Cer 20:1;2O/24:0;O	C44H87NO4	-	SPB 20:1;O2 -H2O (m/z 310.308, 170, C20H40NO+), SPB 20:1;O2 -2H2O (m/z 292.299, 1000, C20H38N+), SPB 20:1;O2 -CH4O2 (m/z 280.299, 140, C19H38N+)	CCCCCCCCCCCCCCCCCCCCCCC(O)C(=O)NC(CO)C(O)\C=C\CCCCCCCCCCCCCCC	ZEHOOLFQJBPFJO-BSKJHSHCNA-N	Standard confirmed	860826P (Avanti)
	Sphingolipids [SP]	Ceramides [SP02]	N-acylsphingosines (ceramides) [SP0201]	Cer-HS	Ceramide hydroxy fatty acid-sphingosine	[M-H]-, [M+HCOO]-, [M+CH3COO]-	Cer 40:1;3O	Cer 18:1;2O/22:0;O	C40H79NO4	NL of CH2O (m/z 606.573, 30, C39H76NO3-), NL of CH4O2 (m/z 588.572, 40, C39H74NO2-)	22:0 Acyl + C2H3N (m/z 380.355, 210, C24H46NO2-), SPB 18:1;O2 - C2H7NO (m/z 237.216, 30, C16H29O-)	CCCCCCCCCCCCCC=CC(O)C(CO)NC(=O)CCCCCCCCCCCCCCCCCCCCCO	AMJLYOTUBFUEBE-UHFFFAOYNA-N	Standard confirmed	860826P (Avanti)
	Sphingolipids [SP]	Ceramides [SP02]	N-acylsphingosines (ceramides) [SP0201]	Cer-NS	Ceramide non-hydroxyfatty acid-sphingosine	[M+H]+	Cer 42:1;2O	Cer 18:1;2O/24:0	C42H83NO3	NL of H2O (m/z 632.64, 120, C42H82NO2+)	SPB 18:1;O2 -H2O (m/z 282.28, 180, C18H36NO+), SPB 18:1;O2 -2H2O (m/z 264.27, 1000, C18H34N+), SPB 18:1;O2 -CH4O2 (m/z 252.269, 120, C17H34N+)	CCCCCCCCCCCCCCCCCCCCCCCC(=O)NC(CO)C(O)\C=C\CCCCCCCCCCCCC	ZJVVOYPTFQEGPH-MHAUTQJVNA-N	Standard confirmed	LM6002-1EA (Avanti)
	Sphingolipids [SP]	Ceramides [SP02]	N-acylsphingosines (ceramides) [SP0201]	Cer-NS	Ceramide non-hydroxyfatty acid-sphingosine	[M-H]-, [M+HCOO]-, [M+CH3COO]-	Cer 34:1;2O	Cer 18:1;2O/16:0	C34H67NO3	NL of H2O (m/z 518.499, 10, C34H64NO3-), NL of CH2O (m/z 506.495, 160, C33H64NO2-)	16:0 Acyl + C2H3N (m/z 280.264, 670, C18H34NO-), SPB 18:1;O2 - C2H7NO (m/z 237.223, 370, C16H29O-), 16:0 Acyl - 2H (m/z 237.223, 370, C16H29O-)	CCCCCCCCCCCCCCCC(=O)NC(CO)C(O)\C=C\CCCCCCCCCCCCC	YDNKGFDKKRUKPY-ORIPQNMZNA-N	Standard confirmed	LM6002-1EA (Avanti)
	Sphingolipids [SP]	Neutral glycosphingolipids [SP05]	Gal- (Gala series) [SP0509]	Hex2Cer	Dihexosylceramide	[M+H]+	Hex2Cer 34:1;2O	Hex2Cer 18:1;2O/16:0	C46H87NO13	NL of C6H10O5 (m/z 700.598, 170, C40H78NO8+), NL of C12H22O11 (m/z 520.498, 990, C34H76NO2+)	SPB 18:1;O2 -H2O (m/z 282.275, 350, C18H36NO+), SPB 18:1;O2 -2H2O (m/z 264.268, 970, C18H34N+), SPB 18:1;O2 -CH4O2 (m/z 252.265, 270, C17H34N+)	CCCCCCCCCCCCCCCC(=O)NC(COC1OC(CO)C(OC2OC(CO)C(O)C(O)C2O)C(O)C1O)C(O)\C=C\CCCCCCCCCCCCC	HLIJNIKSBCIDGO-ORIPQNMZNA-N	Standard confirmed	LM6002-1EA (Avanti)
	Sphingolipids [SP]	Neutral glycosphingolipids [SP05]	Gal- (Gala series) [SP0509]	Hex2Cer	Dihexosylceramide	[M+HCOO]-, [M+CH3COO]-	Hex2Cer 34:1;2O	Hex2Cer 34:1;2O	C46H87NO13	NL of C12H20O10 (m/z 536.509, 70, C34H66NO3-), NL of C6H10O5 (m/z 698.567, 90, C40H76NO8-)	-	CCCCCCCCCCCCCCCC(=O)NC(COC1OC(CO)C(OC2OC(CO)C(O)C(O)C2O)C(O)C1O)C(O)\C=C\CCCCCCCCCCCCC	HLIJNIKSBCIDGO-ORIPQNMZNA-N	Standard confirmed	LM6002-1EA (Avanti)
	Sphingolipids [SP]	Neutral glycosphingolipids [SP05]	Gal- (Gala series) [SP0509]	Hex3Cer	Trihexosylceramide	[M+H]+	Hex3Cer 34:1;2O	Hex3Cer d18:1/16:0	C52H97NO18	NL of C6H12O6 (m/z 844.599, 140, C46H86NO12+), NL of C12H22O11 (m/z 682.557, 240, C40H76NO7+), NL of C18H30O15 (m/z 538.503, 140, C34H68NO3+), NL of C18H30O15 and H2O (m/z 520.5, 1000, C34H66NO2+)	SPB 18:1;O2 -H2O (not observed), SPB 18:1;O2 -2H2O (m/z 264.261, 280, C18H34N+), SPB 18:1;O2 -CH4O2 (not observed)	CCCCCCCCCCCCCCCC(=O)NC(COC1OC(CO)C(OC2OC(CO)C(OC3OC(CO)C(O)C(O)C3O)C(O)C2O)C(O)C1O)C(O)\C=C\CCCCCCCCCCCCC	MGOOTGNGBOPVIV-ORIPQNMZNA-N	Literature based	https://onlinelibrary.wiley.com/doi/abs/10.1002/elps.201700475
	Sphingolipids [SP]	Neutral glycosphingolipids [SP05]	Gal- (Gala series) [SP0509]	Hex3Cer	Trihexosylceramide	[M+HCOO]-, [M+CH3COO]-	Hex3Cer 42:1;2O	Hex3Cer 42:1;2O	C60H113NO18	NL of C18H30O15 (m/z 648.589, 10, C42H83NO3-), NL of C12H20O10 (m/z 810.671, 50, C48H93NO8-), NL of C6H10O5 (m/z 972.731, 30, C54H103NO13-)	-	CCCCCCCCCCCCCCCCCCCCC\C=C\C(O)C(COC1OC(CO)C(OC2OC(CO)C(OC3OC(CO)C(O)C(O)C3O)C(O)C2O)C(O)C1O)NC(=O)CCCCCCCCCCCCCCC	MLCJQTVYTUBZGN-MHAUTQJVNA-N	Literature based	https://onlinelibrary.wiley.com/doi/abs/10.1002/elps.201700475
	Sphingolipids [SP]	Neutral glycosphingolipids [SP05]	Simple Glc series [SP0501] and Acylceramides [SP0204]	AHexCer	Acylhexosylceramide	[M+H]+	AHexCer 56:1;3O	AHexCer (O-16:0)18:1;2O/22:0;O	C62H119NO10	-	NL of 16:0 Acyl and C6H10O5 (m/z 638.611, 120, C40H80NO4+), NL of 16:0 Acyl and C6H10O5 and H2O (m/z 620.587, 470, C40H78NO3+), d18:1 Sph - H2O (m/z 282.280, 90, C18H36NO+), d18:1 Sph - C2H7NO (m/z 239.242, 290, C16H31O+)	CCCCCCCCCCCCCCCCCCCCC(O)C(=O)NC(COC1OC(CO)C(O)C(O)C1OC(=O)CCCCCCCCCCCCCCC)C(O)C=CCCCCCCCCCCCCC	FPSANBZKJWDRIZ-UHFFFAOYNA-N	Structure predicted	NA
	Sphingolipids [SP]	Neutral glycosphingolipids [SP05]	Simple Glc series [SP0501] and Acylceramides [SP0204]	AHexCer	Acylhexosylceramide	[M+HCOO]-, [M+CH3COO]-	AHexCer 56:1;3O	AHexCer (O-16:0)18:1;2O/22:0;O	C62H119NO10	-	NL of 16:0 Acyl (m/z 798.647, 530, C46H88NO9-), NL of 16:0 Acyl and H2O (m/z 780.634, 400, C46H86NO8-), NL of 16:0 Acyl and C6H10O5 (m/z 636.594, 50, C40H78NO4-), 16:0 FA (m/z 255.233, 90, C16H31O2-), NL of (d18:1 Sph - C2H7NO) (m/z 798.647, 530, C46H88NO9-), NL of (d18:1 Sph - C2H7NO) and H2O (m/z 780.634, 400, C46H86NO8-)	CCCCCCCCCCCCCCCCCCCCC(O)C(=O)NC(COC1OC(CO)C(O)C(O)C1OC(=O)CCCCCCCCCCCCCCC)C(O)C=CCCCCCCCCCCCCC	FPSANBZKJWDRIZ-UHFFFAOYNA-N	Structure predicted	NA
	Sphingolipids [SP]	Neutral glycosphingolipids [SP05]	Simple Glc series [SP0501] and Acylceramides [SP0204]	HexCer-EOS	Hexosylceramide Esterified omega-hydroxy fatty acid-sphingosine	[M+H]+	HexCer 69:5;4O	HexCer 17:1;2O/52:4;2O	C75H139NO10	NL of C6H10O5 (m/z 1052.988, 300, C16H130NO5+), NL of C6H10O5 and H2O (m/z 1034.949, 1000, C16H128NO4+)	SPB 17:1;O2 -H2O (m/z 264.266, 110, C17H34NO+), SPB 17:1;O2 -2H2O (m/z 250.246, 300, C17H32N+), SPB 17:1;O2 -CH4O2 (m/z 238.262, 110, C16H32N+)	CCCCCCCCCCCC\C=C\C(O)C(COC1OC(CO)C(O)C(O)C1O)NC(=O)CCCCCCCCCCCCCCCCCCCCCCCCCCCCCCCCCOC(=O)CCCC\C=C/C\C=C/C\C=C/CCCCC	MWRVORBFVHCIND-PBGKKXITNA-N	Literature based	https://jcheminf.biomedcentral.com/articles/10.1186/s13321-017-0205-3
	Sphingolipids [SP]	Neutral glycosphingolipids [SP05]	Simple Glc series [SP0501] and Acylceramides [SP0204]	HexCer-EOS	Hexosylceramide Esterified omega-hydroxy fatty acid-sphingosine	[M+HCOO]-, [M+CH3COO]-	HexCer 68:3;4O	HexCer 18:1;2O/32:0;O(FA 18:2)	C74H139NO10	NL of C6H10O5 and 18:2 FA (m/z 776.732, 110, C50H98NO4-)	NL of 18:2 FA (m/z 938.811, 140, C56H108NO9-), NL of 18:2 FA and C6H10O5 (m/z 776.732, 110, C50H98NO4-), 18:2 FA- (m/z 279.226, 250, C18H31O2-), 32:0 Acyl amide (without omega acyl chain) (m/z 494.458, 20, C32H64NO2-)	CCCCCCCCCCCCC\C=C\C(O)C(COC1OC(CO)C(O)C(O)C1O)NC(=O)CCCCCCCCCCCCCCCCCCCCCCCCCCCCCCCOC(=O)CCCCCCC\C=C/C\C=C/CCCCC	GRNOIEDXTPLWNI-FHDUZSEONA-N	Literature based	https://jcheminf.biomedcentral.com/articles/10.1186/s13321-017-0205-3
	Sphingolipids [SP]	Neutral glycosphingolipids [SP05]	Simple Glc series [SP0501] and N-acyl-4-hydroxysphinganines (phytoceramides) [SP0203]	HexCer-AP	Hexosylceramide alpha-hydroxy fatty acid-phytospingosine	[M+H]+	HexCer 42:0;4O	HexCer 18:0;3O/24:0;(2OH)	C48H95NO10	NL of C6H10O5 (m/z 684.644, 610, C42H86NO5+), NL of C6H10O5 and H2O (m/z 666.638, 1000, C42H84NO4+)	SPB 18:0;O3 (m/z 318.297, 20, C18H40NO3+), SPB 18:0;O3 -H2O (m/z 300.29, 100, C18H38NO2+), SPB 18:0;O3 -3H2O (m/z 264.27, 110, C18H34N+)	CCCCCCCCCCCCCCCCCCCCCCC(O)C(=O)NC(COC1OC(CO)C(O)C(O)C1O)C(O)C(O)CCCCCCCCCCCCCC	ODTUNRBWGNXHMQ-UHFFFAOYNA-N	Literature based	https://jcheminf.biomedcentral.com/articles/10.1186/s13321-017-0205-3
	Sphingolipids [SP]	Neutral glycosphingolipids [SP05]	Simple Glc series [SP0501] and N-acyl-4-hydroxysphinganines (phytoceramides) [SP0203]	HexCer-AP	Hexosylceramide alpha-hydroxy fatty acid-phytospingosine	[M-H]-, [M+HCOO]-, [M+CH3COO]-	HexCer 34:0;4O	HexCer 18:0;3O/16:0;(2OH)	C40H79NO10	NL of C6H10O5 (m/z 570.501, 70, C34H68NO5-)	16:0 Acyl - CH2O (m/z 225.222, 60, C15H29O-), 16:0 Acyl + O (m/z 271.227, 60, C16H31O3-), 16:0 Acyl + C3H5NO (m/z 326.269, 510, C19H36NO3-)	CCCCCCCCCCCCCCC(O)C(O)C(COC1OC(CO)C(O)C(O)C1O)NC(=O)C(O)CCCCCCCCCCCCCC	YGQNMWJVCQBFGZ-UHFFFAOYNA-N	Literature based	https://jcheminf.biomedcentral.com/articles/10.1186/s13321-017-0205-3
	Sphingolipids [SP]	Neutral glycosphingolipids [SP05]	Simple Glc series [SP0501] and N-acylsphinganines (dihydroceramides) [SP0202]	HexCer-NDS	Hexosylceramide non-hydroxyfatty acid-dihydrosphingosine	[M+H]+	HexCer 40:0;2O	HexCer 18:0;2O/22:0	C46H91NO8	NL of C6H10O5 and H2O (m/z 606.61, 1000, C40H80NO2+)	SPB 18:0;O2 -H2O (m/z 284.298, 310, C18H38NO+), SPB 18:0;O2 -2H2O (m/z 266.283, 120, C18H36N+)	CCCCCCCCCCCCCCCCCCCCCC(=O)NC(COC1OC(CO)C(O)C(O)C1O)C(O)CCCCCCCCCCCCCCC	BCRCIDJHDMYLDJ-UHFFFAOYNA-N	Literature based	https://jcheminf.biomedcentral.com/articles/10.1186/s13321-017-0205-3
	Sphingolipids [SP]	Neutral glycosphingolipids [SP05]	Simple Glc series [SP0501] and N-acylsphinganines (dihydroceramides) [SP0202]	HexCer-NDS	Hexosylceramide non-hydroxyfatty acid-dihydrosphingosine	[M-H]-, [M+HCOO]-, [M+CH3COO]-	HexCer 34:0;2O	HexCer 18:0;2O/16:0	C40H79NO8	NL of C6H10O5 (m/z 538.516, 850, C34H68NO3-)	16:0 Acyl + C2H5N (m/z 280.258, 200, C18H34NO-), SPB 18:0;O2 - C2H7NO (m/z 239.232, 50, C16H31O-), 16:0 Acyl -2H (m/z 237.22, 100, C16H29O-)	CCCCCCCCCCCCCCCC(O)C(COC1OC(CO)C(O)C(O)C1O)NC(=O)CCCCCCCCCCCCCCC	BLGKYYVFGMKTEZ-UHFFFAOYNA-N	Literature based	https://jcheminf.biomedcentral.com/articles/10.1186/s13321-017-0205-3
	Sphingolipids [SP]	Neutral glycosphingolipids [SP05]	Simple Glc series [SP0501] and N-acylsphingosines (ceramides) [SP0201]	HexCer-HDS	Hexosylceramide hydroxyfatty acid-dihydrosphingosine	[M+H]+	HexCer 34:0;3O	HexCer 18:0;2O/16:0;O	C40H79NO9	NL of H2O (m/z 700.555, 30, C40H78NO8+), NL of C6H10O5 and H2O (m/z 520.508, 50, C34H66NO2+)	SPB 18:0;O2 -H2O (m/z 284.300, 160, C18H38NO+), SPB 18:0;O2 -2H2O (m/z 266.29, 90, C18H36N+), SPB 18:0;O2 -CH4O2 (m/z 254.285, 30, C17H36N+)	CCCCCCCCCCCCCCCC(O)C(COC1OC(CO)C(O)C(O)C1O)NC(=O)C(O)CCCCCCCCCCCCCC	BTXMXJCBJRQENK-UHFFFAOYNA-N	Literature based	https://jcheminf.biomedcentral.com/articles/10.1186/s13321-017-0205-3
	Sphingolipids [SP]	Neutral glycosphingolipids [SP05]	Simple Glc series [SP0501] and N-acylsphingosines (ceramides) [SP0201]	HexCer-HDS	Hexosylceramide hydroxyfatty acid-dihydrosphingosine	[M+HCOO]-, [M+CH3COO]-	HexCer 34:0;3O	HexCer 34:0;3O	C40H79NO9	NL of C6H10O5 (m/z 554.504, 320, C34H68NO4-)	-	CCCCCCCCCCCCCCCCC(O)C(COC1OC(CO)C(O)C(O)C1O)NC(=O)C(O)CCCCCCCCCCCCC	JCMUGGOZEQUDMK-UHFFFAOYNA-N	Literature based	https://jcheminf.biomedcentral.com/articles/10.1186/s13321-017-0205-3
	Sphingolipids [SP]	Neutral glycosphingolipids [SP05]	Simple Glc series [SP0501] and N-acylsphingosines (ceramides) [SP0201]	HexCer-HS	Hexosylceramide hydroxyfatty acid-sphingosine	[M+H]+	HexCer 42:2;3O	HexCer 18:1;2O/24:1;O	C48H91NO9	NL of H2O (m/z 808.674, 790, C48H90NO8+), NL of C6H10O5 and H2O (m/z 646.62, 990, C42H80NO3+)	SPB 18:1;O2 -H2O (m/z 282.282, 400, C18H36NO), SPB 18:1;O2 -2H2O (m/z 264.259, 1000, C18H34N), SPB 18:1;O2 -CH4O2 (m/z 252.265, 400, C17H34N)	CCCCCCCCCCCCC\C=C\C(O)C(COC1OC(CO)C(O)C(O)C1O)NC(=O)C(O)CCCCCCCC\C=C/CCCCCCCCCCCC	LHJNIQKMMAAQBK-SZHIUZGGNA-N	Literature based	https://jcheminf.biomedcentral.com/articles/10.1186/s13321-017-0205-3
	Sphingolipids [SP]	Neutral glycosphingolipids [SP05]	Simple Glc series [SP0501] and N-acylsphingosines (ceramides) [SP0201]	HexCer-HS	Hexosylceramide hydroxyfatty acid-sphingosine	[M+HCOO]-, [M+CH3COO]-	HexCer 42:2;3O	HexCer 16:1;2O/26:1;O	C48H91NO9	NL of C6H10O5 (m/z 662.606, 70, C42H80NO4-)	26:1;O Acylamide -2H (m/z 406.365, 40, C16H48NO2-)	CCCCCCCCCCCCCC\C=C/CCCCCCCCC(O)C(=O)NC(COC1OC(CO)C(O)C(O)C1O)C(O)\C=C\CCCCCCCCCCC	RPOIIJQVKQDIGR-ZPNUAFEWNA-N	Literature based	https://jcheminf.biomedcentral.com/articles/10.1186/s13321-017-0205-3
	Sphingolipids [SP]	Neutral glycosphingolipids [SP05]	Simple Glc series [SP0501] and N-acylsphingosines (ceramides) [SP0201]	HexCer-NS	Hexosylceramide non-hydroxyfatty acid-sphingosine	[M+H]+	HexCer 42:1;2O	HexCer 18:1;2O/24:0	C48H93NO8	NL of H2O (m/z 794.684, 260, C48H92NO7+), NL of C6H10O5 and H2O (m/z 632.63, 250, C42H82NO2+)	SPB 18:1;O2 -H2O (m/z 282.279, 90, C18H36NO+), SPB 18:1;O2 -2H2O (m/z 264.268, 1000, C18H34N+), SPB 18:1;O2 -CH4O2 (m/z 252.27, 70, C17H34N+)	CCCCCCCCCCCCCCCCCCCCCCCC(=O)NC(COC1OC(CO)C(O)C(O)C1O)C(O)\C=C\CCCCCCCCCCCCC	POQRWMRXUOPCLD-MHAUTQJVNA-N	Standard confirmed	LM6002-1EA (Avanti)
	Sphingolipids [SP]	Neutral glycosphingolipids [SP05]	Simple Glc series [SP0501] and N-acylsphingosines (ceramides) [SP0201]	HexCer-NS	Hexosylceramide non-hydroxyfatty acid-sphingosine	[M-H]-, [M+HCOO]-, [M+CH3COO]-	HexCer 38:1;2O	HexCer 18:1;2O/20:0	C44H85NO8	NL of C6H10O5 (m/z 592.569, 510, C38H74NO3-)	20:0 Acyl + C2H5N (m/z 336.324, 70, C22H42NO-), SPB 18:1;O2 - C2H7NO (m/z 237.221, 30, C16H29O-), 20:0 Acyl -2H (m/z 293.285, 30, C20H39O-)	CCCCCCCCCCCCCCCCCCCC(=O)NC(COC1OC(CO)C(O)C(O)C1O)C(O)\C=C\CCCCCCCCCCCCC	DFELABABMXOKTD-QOSDPKFLNA-N	Standard confirmed	LM6002-1EA (Avanti)
	Sphingolipids [SP]	Phosphosphingolipids [SP03]	Ceramide phosphocholines (sphingomyelins) [SP0301]	ASM	Acylsphingomyelin	[M+H]+	SM 52:2;3O	SM 34:1;2O(FA 18:0)	C57H113N2O7P	Characteristic fragment (m/z 184.074, 1000, C5H15NO4P+)	NL of 18:0 Acyl and H2O (m/z 685.548, 270, C39H78N2O5P+)	CCCCCCCCCCCCCCCCCC(=O)NC(COP([O-])(=O)OCC[N+](C)(C)C)C(OC(=O)CCCCCCCCCCCCCCCCC)C=CCCCCCCCCCCC	NXNZLWGRIQLZPW-UHFFFAOYNA-N	Structure predicted	NA
	Sphingolipids [SP]	Phosphosphingolipids [SP03]	Ceramide phosphocholines (sphingomyelins) [SP0301]	ASM	Acylsphingomyelin	[M+HCOO]-, [M+CH3COO]-	SM 52:2;3O	SM 34:1;2O(FA 18:0)	C57H113N2O7P	NL of CH3 (m/z 953.809, 1000, C56H110N2O7P-)	NL of CH3 and 18:0 Acyl and H2O (m/z 669.534, 170, C38H74N2O5P-), 18:0 FA (m/z 283.266, 100, C18H35O2-), Acyl amide (without omega acyl chain) (not observed)	CCCCCCCCCCCCCCCCCC(=O)NC(COP([O-])(=O)OCC[N+](C)(C)C)C(OC(=O)CCCCCCCCCCCCCCCCC)C=CCCCCCCCCCCC	NXNZLWGRIQLZPW-UHFFFAOYNA-N	Structure predicted	NA
	Sphingolipids [SP]	Phosphosphingolipids [SP03]	Ceramide phosphocholines (sphingomyelins) [SP0301]	SM	Sphingomyelin	[M+H]+	SM 34:1;2O	SM 18:1;2O/16:0	C39H79N2O6P	Characteristic fragment (m/z 184.072, 1000, C5H15NO4P+)	SPB 18:1;O2 -2H2O (m/z 264.258, 10, C18H34N+)	CCCCCCCCCCCCCCCC(=O)NC(COP([O-])(=O)OCC[N+](C)(C)C)C(O)\C=C\CCCCCCCCCCCCC	RWKUXQNLWDTSLO-NHQGMKOONA-N	Standard confirmed	LM6002-1EA (Avanti)
	Sphingolipids [SP]	Phosphosphingolipids [SP03]	Ceramide phosphocholines (sphingomyelins) [SP0301]	SM	Sphingomyelin	[M+Na]+	SM 34:1;2O		C39H79N2O6P	NL of C3H9N (m/z 666.49, 760, C36H70NO6PNa+), NL of C5H14NO4P (m/z 542.487, 1000, C34H65NO2Na+), NL of C5H16NO5P (m/z 502.499, 40, C34H64NO+)	-	CCCCCCCCCC\C=C/CCCCCCCCCCCCCC(=O)NC(COP([O-])(=O)OCC[N+](C)(C)C)C(O)CCCCC	NENCNFRZZCQXJU-ZCXUNETKNA-N	Standard confirmed	LM6002-1EA (Avanti)
	Sphingolipids [SP]	Phosphosphingolipids [SP03]	Ceramide phosphocholines (sphingomyelins) [SP0301]	SM	Sphingomyelin	[M+HCOO]-, [M+CH3COO]-	SM 38:1;2O	SM 18:1;2O/20:0	C43H87N2O6P	Characteristic fragment (m/z 168.041, 80, C4H11NO4P-), NL of CH3 (m/z 743.61, 1000, C42H84N2O6P-)	NL of CH3 and 20:0 Acyl (m/z 449.32, 10, C22H46N2O5P-)	CCCCCCCCCCCCCCCCCCCC(=O)NC(COP([O-])(=O)OCC[N+](C)(C)C)C(O)\C=C\CCCCCCCCCCCCC	AADLTHQNYQJHQV-JMUUFCRMNA-N	Standard confirmed	LM6002-1EA (Avanti)
	Sphingolipids [SP]	Phosphosphingolipids [SP03]	Ceramide phosphocholines (sphingomyelins) [SP0301]	SM+O	Oxidized sphingomyelin	[M+H]+	SM 34:1;3O	SM 34:1;3O	C39H79N2O7P	Characteristic fragment (m/z 184.071, 1000, C5H15NO4P+)	-	CCCCCCCCCCCCCCCC(=O)NC(COP([O-])(=O)OCC[N+](C)(C)C)C(O)C(O)CCC\C=C\CCCCCCCCC	XIYNMXJEMPRQPO-WJTDDFOZNA-N	Literature based	https://onlinelibrary.wiley.com/doi/abs/10.1002/elps.201700475
	Sphingolipids [SP]	Phosphosphingolipids [SP03]	Ceramide phosphocholines (sphingomyelins) [SP0301]	SM+O	Oxidized sphingomyelin	[M+HCOO]-, [M+CH3COO]-	SM 34:1;3O	SM 34:1;3O	C39H79N2O7P	Characteristic fragment (m/z 168.041, 180, C4H11NO4P-), NL of CH3 (m/z 703.535, 1000, C38H76N2O7P-)	-	CCCCCCCCCCCCCCCC(=O)NC(COP([O-])(=O)OCC[N+](C)(C)C)C(O)C(O)CCC\C=C\CCCCCCCCC	XIYNMXJEMPRQPO-WJTDDFOZNA-N	Literature based	https://onlinelibrary.wiley.com/doi/abs/10.1002/elps.201700475
	Sphingolipids [SP]	Phosphosphingolipids [SP03]	Ceramide phosphoethanolamines [SP0302]	PE-Cer	Ceramide phosphoethanolamine	[M-H]-	PE-Cer 36:1;2O	PE-Cer 18:1;2O/18:0	C38H77N2O6P	Characteristic fragment (m/z 140.008, 350, C2H7NO4P-)	NL of (d18:0 Acyl) (m/z 421.295, 90, C20H42N2O5P-)	CCCCCCCCCCCCCCCCCC(=O)NC(COP(O)(=O)OCCN)C(O)\C=C\CCCCCCCCCCCCC	ODXAYQMCAAQOSY-OWWNRXNENA-N	Literature based	https://onlinelibrary.wiley.com/doi/full/10.1111/j.1550-7408.2008.00365.x
	Sphingolipids [SP]	Phosphosphingolipids [SP03]	Ceramide phosphoethanolamines [SP0302]	PE-Cer+O	Oxidized ceramide phosphoethanolamine	[M-H]-	PE-Cer 35:0;3O	PE-Cer 18:0;2O/17:0;O	C37H77N2O7P	Characteristic fragment (m/z 140.012, 350, C2H7NO4P-)	NL of (17:0 Acyl+O) (m/z 423.294, 40, C20H44N2O5P-)	CCCCCCCCCCCCCCCCC(O)C(COP(O)(=O)OCCN)NC(=O)C(O)CCCCCCCCCCCCCC	LLBNAWSNRKJBED-UHFFFAOYNA-N	Literature based	https://onlinelibrary.wiley.com/doi/full/10.1111/j.1550-7408.2008.00365.x
	Sphingolipids [SP]	Phosphosphingolipids [SP03]	Ceramide phosphoinositols [SP0303]	PI-Cer+O	Oxidized ceramide phosphoinositol	[M+H]+	PI-Cer 34:0;3O	PI-Cer 34:0;3O	C40H80NO12P	NL of C6H13O9P (m/z 538.517, 1000, C34H68NO3+)	-	CCCCCCCCCCCCCCCC(O)C(COP(O)(=O)OC1C(O)C(O)C(O)C(O)C1O)NC(=O)CC(O)CCCCCCCCCCCCC	QEJGJFVAQXAHPY-UHFFFAOYNA-N	Literature based	http://www.jlr.org/content/55/12/2620
	Sphingolipids [SP]	Phosphosphingolipids [SP03]	Ceramide phosphoinositols [SP0303]	PI-Cer+O	Oxidized ceramide phosphoinositol	[M-H]-	PI-Cer 34:0;3O	PI-Cer 18:0;2O/16:0;O	C40H80NO12P	Phosphoinositol - H2O (m/z 241.013, 190, C6H10O8P-), NL of inositol (m/z 634.487, 20, C34H69NO7P-)	NL of 16:0;O Acyl (m/z 542.314, 10, C24H49NO10P-)	CCCCCCCCCCCCCCCC(O)C(COP(O)(=O)OC1C(O)C(O)C(O)C(O)C1O)NC(=O)CC(O)CCCCCCCCCCCCC	QEJGJFVAQXAHPY-UHFFFAOYNA-N	Literature based	http://www.jlr.org/content/55/12/2620
	Sphingolipids [SP]	Sphingoid bases [SP01]	Sphingoid base analogs [SP0108]	SL	Sulfonolipid	[M+H]+, [M+NH4]+	SL 33:0;O	SL 18:0;O/15:0	C33H67NO5S	Characteristic fragment (m/z 124.002, 260, C2H6NO3S+)	NL of 15:0 Acyl (m/z 366.264, 600, C18H40NO4S+), NL of 15:0 Acyl and H2O (m/z 348.258, 1000, C18H38NO3S+), NL of (SPB 18:0;O - C2H8N) (m/z 352.26, 530, C17H38NO4S+), NL of (SPB 18:0;O - C2H8N) and H2O (m/z 334.242, 860, C17H36NO3S+)	CCCCCCCCCCCCCCCC(O)C(CS(O)(=O)=O)NC(=O)CCCCCCCCCCCCCC	WLCOUWIGTFFPSW-UHFFFAOYNA-N	Literature based	https://www.nature.com/articles/s41598-017-10369-z
	Sphingolipids [SP]	Sphingoid bases [SP01]	Sphingoid base analogs [SP0108]	SL	Sulfonolipid	[M-H]-	SL 34:0;O	SL 18:0;O/16:0	C34H69NO5S	Sulfite (m/z 79.958, 4, SO3-), Hydrogensulfite (m/z 80.965, 4, HSO3-)	NL of 16:0 Acyl (m/z 364.256, 20, C18H38NO4S-)	CCCCCCCCCCCCCCCC(O)C(CS(O)(=O)=O)NC(=O)CCCCCCCCCCCCCCC	ICVJWTSWYPTZFY-UHFFFAOYNA-N	Literature based	https://www.nature.com/articles/s41598-017-10369-z
	Sphingolipids [SP]	Sphingoid bases [SP01]	Sphingoid base analogs [SP0108]	SL+O	Oxidized sulfonolipid	[M+H]+, [M+NH4]+	SL 33:1;2O	SL 17:0;O/16:1;O	C33H65NO6S	Characteristic fragment (m/z 124.003, 180, C2H6NO3S+)	NL of 16:1;O Acyl and H2O (m/z 334.237, 1000, C17H36NO3S+), 16:1;O Acyl (m/z 253.217, 760, C16H29O2+)	CCCCCCCCCCCCCCC(O)C(CS(O)(=O)=O)NC(=O)C(O)CCCC\C=C/CCCCCCCC	GQJCABQMXBISGH-ZZEZOPTANA-N	Literature based	https://www.nature.com/articles/s41598-017-10369-z
	Sphingolipids [SP]	Sphingoid bases [SP01]	Sphingoid base analogs [SP0108]	SL+O	Oxidized sulfonolipid	[M-H]-	SL 34:1;2O	SL 18:0;O/16:1;O	C34H67NO6S	Sulfite (m/z 79.958, 10, SO3- )	NL of 16:1 Acyl+O (m/z 364.254, 1000, C18H38NO4S-)	CCCCCCCCCCCCCCCC(O)C(CS(O)(=O)=O)NC(=O)C(O)CCCC\C=C/CCCCCCCC	YOORMWDWVGTKSU-UZYVYHOENA-N	Literature based	https://www.nature.com/articles/s41598-017-10369-z
	Sphingolipids [SP]	Sphingoid bases [SP01]	Sphingoid base homologs and variants [SP0104]	DHSph	Sphinganine	[M+H]+	SPB 17:0;2O	SPB 17:0;(1OH,3OH)	C17H37NO2	NL of H2O (m/z 270.277, 580, C17H36NO+), NL of 2H2O (m/z 252.284, 140, C17H34N+), NL of CH4O2 (m/z 240.271, 1000, C16H34N+),	-	CCCCCCCCCCCCCCC(O)C(N)CO	KFQUQCFJDMSIJF-UHFFFAOYNA-N	Standard confirmed	LM6002-1EA (Avanti)
	Sphingolipids [SP]	Sphingoid bases [SP01]	Sphingoid base homologs and variants [SP0104]	PhytoSph	Phytosphingosine	[M+H]+	SPB 18:0;3O	SPB 18:0;(1OH,3OH,4OH)	C18H39NO3	NL of H2O , NL of 2H2O (m/z 282.269, 1000, C18H36NO+), NL of 3H2O (m/z 264.257, 500, C18H34N+), NL of CH4O2 (m/z 270.276, 500, C17H36NO+),	-	CCCCCCCCCCCCCCC(O)C(O)C(N)CO	AERBNCYCJBRYDG-UHFFFAOYNA-N	Standard confirmed	860499P (Avanti)
	Sphingolipids [SP]	Sphingoid bases [SP01]	Sphingoid base homologs and variants [SP0104]	Sph	Sphingosine	[M+H]+	SPB 18:1;2O	SPB 18:1;(1OH,3OH)	C18H37NO2	NL of H2O (m/z 282.276, 1000, C18H36NO+), NL of 2H2O (m/z 264.261, 760, C18H34N+), NL of CH4O2 (m/z 252.272, 760, C17H34N+),	-	CCCCCCCCCCCCC\C=C\C(O)C(N)CO	WWUZIQQURGPMPG-CCEZHUSRNA-N	Standard confirmed	LM6002-1EA (Avanti)
	Sterol Lipids [ST]	Bile acids and derivatives [ST04]		BASulfate	Bile acid sulfate (e.g. Cholic acid sulfate)	[M-H]-	ST 24:1;O5;S	CA;S	C24H40O8S	Hydrogensulfate (m/z 96.959, 200, HSO4-)	-	C[C@H](CCC(O)=O)[C@H]1CC[C@H]2[C@@H]3[C@H](O)C[C@@H]4C[C@@H](CC[C@]4(C)[C@H]3C[C@H](O)[C@]12C)OS(O)(=O)=O	AUVYDCOKXDDYKR-OELDTZBJSA-N	Literature based	https://www.mdpi.com/1660-3397/17/1/10
	Sterol Lipids [ST]	Bile acids and derivatives [ST04]		BileAcid	Glycine conjugated bile acid (e.g. Glycodeoxycholic acid)	[M-H]-, [M+HCOO]-, [M+CH3COO]-	ST 24:1;O3;G	DCA;G	C26H43NO5	Glycine ion (m/z 74.024, 5, C2H4NO2-)	-	C[C@H](CCC(=O)NCC(=O)O)[C@H]1CC[C@@H]2[C@@]1([C@H](C[C@H]3[C@H]2CC[C@H]4[C@@]3(CC[C@H](C4)O)C)O)C	WVULKSPCQVQLCU-BUXLTGKBSA-N	Standard confirmed	Biocrates® Bile Acids Kit (Biocrates)
	Sterol Lipids [ST]	Bile acids and derivatives [ST04]		BileAcid	Taurine conjugated bile acid (e.g. Taurolithocholic acid)	[M-H]-, [M+HCOO]-, [M+CH3COO]-	ST 24:1;O2;T	LCA;T	C26H45NO5S	Taurine ion (m/z 124.01, 1, C2H6NO3S-)	-	C[C@H](CCC(=O)NCCS(=O)(=O)O)[C@H]1CC[C@@H]2[C@@]1(CC[C@H]3[C@H]2CC[C@H]4[C@@]3(CC[C@H](C4)O)C)C	QBYUNVOYXHFVKC-GBURMNQMSA-N	Standard confirmed	Biocrates® Bile Acids Kit (Biocrates)
	Sterol Lipids [ST]	Bile acids and derivatives [ST04]		DCAE	Bile acid ester (e.g. Esterified deoxycholic acid)	[M+NH4]+	SE 24:1;O3/18:1	DCAE 18:1	C42H72O5	ST 24:1;O2+ (m/z 357.274, 1000, C24H37O2+)	-	CCCCCCCC\C=C/CCCCCCCC(=O)OC1CCC2(C)C(CCC3C4CCC(C(C)CCC(O)=O)C4(C)C(O)CC23)C1	SETZXCDZKDISRM-SEYXRHQNNA-N	Structure predicted	NA
	Sterol Lipids [ST]	Bile acids and derivatives [ST04]		DCAE	Bile acid ester (e.g. Esterified deoxycholic acid)	[M-H]-	SE 24:1;O3/18:1	DCAE 18:1	C42H72O5	ST 24:1;O3- (m/z 373.269, 50, C24H37O3-)	18:1 FA (m/z 281.247, 50, C18H33O2-)	CCCCCCCC\C=C/CCCCCCCC(=O)OC1CCC2(C)C(CCC3C4CCC(C(C)CCC(O)=O)C4(C)C(O)CC23)C1	SETZXCDZKDISRM-SEYXRHQNNA-N	Structure predicted	NA
	Sterol Lipids [ST]	Other Sterol lipids [ST00]		AHexBRS	Acylhexosyl brassicasterol	[M-H]-, [M+HCOO]-, [M+CH3COO]-	ST 28:2;O;Hex;FA 16:0	BRS;Hex;FA 16:0	C50H86O7	-	16:0 FA- (m/z 255.228, 1000, C16H31O2-)	CCCCCCCCCCCCCCCC(=O)OCC1OC(OC2CCC3(C)C4CCC5(C)C(CCC5C4CC=C3C2)C(C)C=CC(C)C(C)C)C(O)C(O)C1O	ZLXHIFXOCNWIKN-UHFFFAOYNA-N	Literature based	https://www.ncbi.nlm.nih.gov/pmc/articles/PMC3612988/
	Sterol Lipids [ST]	Other Sterol lipids [ST00]		AHexCAS	Acylhexosyl campesterol	[M+NH4]+	ST 28:1;O;Hex;FA 18:2	CAS;Hex;FA 18:2	C52H88O7	ST 28:1+ (m/z 383.361, 1000, C28H47+)	-	CCCCC\C=C/C\C=C/CCCCCCCC(=O)OCC1OC(OC2CCC3(C)C4CCC5(C)C(CCC5C4CC=C3C2)C(C)CCC(C)C(C)C)C(O)C(O)C1O	GQUUYRBGRSKWNI-QGLGPCELNA-N	Literature based	https://www.ncbi.nlm.nih.gov/pmc/articles/PMC3612988/
	Sterol Lipids [ST]	Other Sterol lipids [ST00]		AHexCAS	Acylhexosyl campesterol	[M-H]-, [M+HCOO]-, [M+CH3COO]-	ST 28:1;O;Hex;FA 18:1	CAS;Hex;FA 18:1	C52H90O7	-	18:1 FA (m/z 281.256, 600, C18H33O2-)	CCCCCCCC\C=C/CCCCCCCC(=O)OCC1OC(OC2CCC3(C)C4CCC5(C)C(CCC5C4CC=C3C2)C(C)CCC(C)C(C)C)C(O)C(O)C1O	SZVZHAIFWPRDNE-NXVVXOECNA-N	Literature based	https://www.ncbi.nlm.nih.gov/pmc/articles/PMC3612988/
	Sterol Lipids [ST]	Other Sterol lipids [ST00]		AHexCS	Acylhexosyl cholesterol	[M+NH4]+	ST 27:1;O;Hex;FA 16:0	CS;Hex;FA 16:0	C49H86O7	ST 27:1+ (m/z 369.353, 1000, C27H45+)	-	CCCCCCCCCCCCCCCC(=O)OCC1OC(OC2CCC3(C)C4CCC5(C)C(CCC5C4CC=C3C2)C(C)CCCC(C)C)C(O)C(O)C1O	YPMUZVRAVKLKGC-UHFFFAOYNA-N	Literature based	https://www.ncbi.nlm.nih.gov/pmc/articles/PMC3612988/
	Sterol Lipids [ST]	Other Sterol lipids [ST00]		AHexCS	Acylhexosyl cholesterol	[M-H]-, [M+HCOO]-, [M+CH3COO]-	ST 27:1;O;Hex;FA 18:1	CS;Hex;FA 18:1	C49H86O7	-	18:1 FA (m/z 281.241, 330, C18H33O2-)	CCCCCCCCCCCCCCCC(=O)OCC1OC(OC2CCC3(C)C4CCC5(C)C(CCC5C4CC=C3C2)C(C)CCCC(C)C)C(O)C(O)C1O	YPMUZVRAVKLKGC-UHFFFAOYNA-N	Literature based	https://www.ncbi.nlm.nih.gov/pmc/articles/PMC3612988/
	Sterol Lipids [ST]	Other Sterol lipids [ST00]		AHexSIS	Acylhexosyl sitosterol	[M+NH4]+	ST 29:1;O;Hex;FA 18:1	SIS;Hex;FA 18:1	C53H92O7	ST 29:1+ (m/z 397.384, 1000, C29H49+)	-	CCCCCCCC\C=C/CCCCCCCC(=O)OCC1OC(OC2CCC3(C)C4CCC5(C)C(CCC5C4CC=C3C2)C(C)CCC(CC)C(C)C)C(O)C(O)C1O	MEEONOMPSMYAQO-MSUUIHNZNA-N	Literature based	https://www.ncbi.nlm.nih.gov/pmc/articles/PMC3612988/
	Sterol Lipids [ST]	Other Sterol lipids [ST00]		AHexSIS	Acylhexosyl sitosterol	[M-H]-, [M+HCOO]-, [M+CH3COO]-	ST 29:1;O;Hex;FA 18:1	SIS;Hex;FA 18:1	C53H92O7	-	18:1 FA (m/z 281.250, 1000, C18H33O2-)	CCCCCCCC\C=C/CCCCCCCC(=O)OCC1OC(OC2CCC3(C)C4CCC5(C)C(CCC5C4CC=C3C2)C(C)CCC(CC)C(C)C)C(O)C(O)C1O	MEEONOMPSMYAQO-MSUUIHNZNA-N	Literature based	https://www.ncbi.nlm.nih.gov/pmc/articles/PMC3612988/
	Sterol Lipids [ST]	Other Sterol lipids [ST00]		AHexSTS	Acylhexosyl stigmasterol	[M+NH4]+	ST 29:2;O;Hex;FA 16:0	STS;Hex;FA 16:0	C51H88O7	ST 29:2+ (m/z 395.372, 1000, C29H47+)	-	CCCCCCCCCCCCCCCC(=O)OCC1OC(OC2CCC3(C)C4CCC5(C)C(CCC5C4CC=C3C2)C(C)C=CC(CC)C(C)C)C(O)C(O)C1O	SQDYRCMAEQXKCQ-UHFFFAOYNA-N	Literature based	https://www.ncbi.nlm.nih.gov/pmc/articles/PMC3612988/
	Sterol Lipids [ST]	Other Sterol lipids [ST00]		AHexSTS	Acylhexosyl stigmasterol	[M-H]-, [M+HCOO]-, [M+CH3COO]-	ST 29:2;O;Hex;FA 16:0	STS;Hex;FA 16:0	C51H88O7	-	16:0 FA- (m/z 255.228, 110, C16H31O2-)	CCCCCCCCCCCCCCCC(=O)OCC1OC(OC2CCC3(C)C4CCC5(C)C(CCC5C4CC=C3C2)C(C)C=CC(CC)C(C)C)C(O)C(O)C1O	SQDYRCMAEQXKCQ-UHFFFAOYNA-N	Literature based	https://www.ncbi.nlm.nih.gov/pmc/articles/PMC3612988/
	Sterol Lipids [ST]	Secosteroids [ST03]		Vitamin D	Vitamin D	[M+H]+, [M+Na]+	Calcidiol	Calcidiol	C27H44O2	Precursor (m/z 401.35, 1000, C27H45O2+) NL of H2O (m/z 383.342, 490, C27H43O+), NL of 2H2O (m/z 365.318, 510, C27H41+)	-	CC(CCCC(C)(C)O)C1CCC2C(CCCC12C)=CC=C1CC(O)CCC1=C	JWUBBDSIWDLEOM-UHFFFAOYNA-N	Standard confirmed	9000683 (Cayman)
	Sterol Lipids [ST]	Steroid conjugates [ST05]	Sulfates [ST0502]	SSulfate	Sterol sulfate (e.g. Cholesterol sulfate)	[M-H]-	ST 27:1;O;S	CS;S	C27H46O4S	Cholesterol sulfate (m/z 465.300, 1000, C27H45O4S-), Hydrogensulfate (m/z 96.960, 640, HSO4-)	-	CC(C)CCCC(C)C1CCC2C3CC=C4CC(CCC4(C)C3CCC12C)OS(O)(=O)=O	BHYOQNUELFTYRT-UHFFFAOYNA-N	Literature based	https://www.mdpi.com/1660-3397/17/1/10
	Sterol Lipids [ST]	Sterols [ST01]	Cholesterol and derivatives [ST0101]	SHex	Stigmasterol hexoside	[M+NH4]+	ST 29:2;O;Hex	STS;Hex	C35H58O6	ST 29:2+ (m/z 395.367, 1000, C29H47+)		CCC(C=CC(C)C1CCC2C3CC=C4CC(CCC4(C)C3CCC12C)OC1OC(CO)C(O)C(O)C1O)C(C)C	VWDLOXMZIGUBKM-UHFFFAOYNA-N	Literature based	https://www.sciencedirect.com/science/article/pii/S1387380614000724
	Sterol Lipids [ST]	Sterols [ST01]	Cholesterol and derivatives [ST0101]	SHex	Stigmasterol hexoside	[M-H]-	ST 29:2;O;Hex	STS;Hex	C35H58O6	Hexose (m/z 179.0561, C6H11O6-)		CCC(C=CC(C)C1CCC2C3CC=C4CC(CCC4(C)C3CCC12C)OC1OC(CO)C(O)C(O)C1O)C(C)C	VWDLOXMZIGUBKM-UHFFFAOYNA-N	Literature based	https://www.sciencedirect.com/science/article/pii/S1387380614000724
	Sterol Lipids [ST]	Sterols [ST01]	Cholesterol and derivatives [ST0101]	ST	Cholesterol	[M+H]+, [M+NH4]+, [M-H2O+H]+	ST 27:1;O	Cholesterol	C27H46O	ST 27:1+ (m/z 369.3516, 1000, C27H45+)	-	OC1CC2=CCC3C(CCC4(C)C(CCC34)C(C)CCCC(C)C)C2(C)CC1	HVYWMOMLDIMFJA-UHFFFAOYSA-N		330707-1EA (Avanti)	This study
	Sterol Lipids [ST]	Sterols [ST01]	Cholesterol and derivatives [ST0101]	ST	Dihydrocholesterol	[M+H]+, [M+NH4]+, [M-H2O+H]+	ST 27:0;O	Dihydrocholesterol	C27H48O	ST 27:0+ (m/z , 1000, C27H47+)	-	OC1CCC2(C)C(CCC3C4CCC(C(C)CCCC(C)C)C4(C)CCC32)C1	QYIXCDOBOSTCEI-UHFFFAOYSA-N		only by the precursor m/z value	This study
	Sterol Lipids [ST]	Sterols [ST01]	Cholesterol and derivatives [ST0101]	ST	Desmosterol	[M+H]+, [M+NH4]+, [M-H2O+H]+	ST 27:2;O	Desmosterol	C27H44O	ST 27:2+(m/z 367.3359, 1000, C27H43+)	-	OC1CC2=CCC3C(CCC4(C)C(CCC34)C(C)CCC=C(C)C)C2(C)CC1	AVSXSVCZWQODGV-UHFFFAOYSA-N		only by the precursor m/z value	This study
	Sterol Lipids [ST]	Sterols [ST01]	Ergosterols and C24-methyl derivatives [ST0103]	ST	Brassicasterol	[M+H]+, [M+NH4]+, [M-H2O+H]+	ST 28:2;O	Brassicasterol	C28H46O	ST 28:2+ (m/z 381.3516, 1000, C28H45+)	-	OC1CC2=CCC3C(CCC4(C)C(CCC34)C(C=CC(C)C(C)C)C)C2(C)CC1	OILXMJHPFNGGTO-UHFFFAOYSA-N		only by the precursor m/z value	This study
	Sterol Lipids [ST]	Sterols [ST01]	Ergosterols and C24-methyl derivatives [ST0103]	ST	Campesterol	[M+H]+, [M+NH4]+, [M-H2O+H]+	ST 28:1;O	Campesterol	C28H48O	ST 28:1+ (m/z 383.3672, 1000, C28H47+)	-	OC1CC2=CCC3C(CCC4(C)C(CCC34)C(C)CCC(C)C(C)C)C2(C)CC1	SGNBVLSWZMBQTH-UHFFFAOYSA-N		only by the precursor m/z value	This study
	Sterol Lipids [ST]	Sterols [ST01]	Ergosterols and C24-methyl derivatives [ST0103]	ST	Ergosterol	[M+H]+, [M+NH4]+, [M-H2O+H]+	ST 28:3;O	Ergosterol	C28H44O	ST 28:3+(379.3359, 1000, C28H43+)	-	OC1CC2=CC=C3C(CCC4(C)C3CCC4C(C=CC(C)C(C)C)C)C2(C)CC1	DNVPQKQSNYMLRS-UHFFFAOYSA-N		only by the precursor m/z value	This study
	Sterol Lipids [ST]	Sterols [ST01]	Ergosterols and C24-methyl derivatives [ST0103]	ST	Dehydroergosterol	[M+H]+, [M+NH4]+, [M-H2O+H]+	ST 28:4;O	Dehydroergosterol	C28H42O	ST 28:4+(m/z 377.3203, 1000, C28H41+)	-	OC1CC2=CC=C3C(=CCC4(C)C3CCC4C(C=CC(C)C(C)C)C)C2(C)CC1	QSVJYFLQYMVBDR-UHFFFAOYSA-N		only by the precursor m/z value	This study
	Sterol Lipids [ST]	Sterols [ST01]	Steryl esters [ST0102]	BRSE	Brassicasterol ester	[M+NH4]+	SE 28:2/22:6	BRSE 22:6	C50H76O2	ST 28:2+ (m/z 381.341, 1000, C28H45+)	-	CC\C=C/C\C=C/C\C=C/C\C=C/C\C=C/C\C=C/CCC(=O)OC1CCC2(C)C3CCC4(C)C(CCC4C3CC=C2C1)C(C)C=CC(C)C(C)C	KKPGEUZMHRXIDU-NKWULGDGNA-N	Literature based	https://www.sciencedirect.com/science/article/pii/S1387380614000724
	Sterol Lipids [ST]	Sterols [ST01]	Steryl esters [ST0102]	CASE	Campesterol ester	[M+NH4]+	SE 28:1/18:1	CASE 18:1	C46H80O2	ST 28:1+ (m/z 383.376, 1000, C28H47+)	-	CCCCCC\C=C/CCCCCCCCCC(=O)OC1CCC2(C)C3CCC4(C)C(CCC4C3CC=C2C1)C(C)CCC(C)C(C)C	FADVQEKKXJMGQA-YPKPFQOONA-N	Literature based	https://www.sciencedirect.com/science/article/pii/S1387380614000724
	Sterol Lipids [ST]	Sterols [ST01]	Steryl esters [ST0102]	CE	Cholesteryl ester	[M+NH4]+, [M+Na]+	SE 27:1/18:1	CE 18:1	C45H78O2	ST 27:1+ (m/z 369.349, 1000, C27H45+)	-	CCCCCCCC\C=C/CCCCCCCC(=O)OC1CCC2(C)C3CCC4(C)C(CCC4C3CC=C2C1)C(C)CCCC(C)C	RJECHNNFRHZQKU-PFONDFGANA-N	Standard confirmed	700186M (Avanti)
	Sterol Lipids [ST]	Sterols [ST01]	Steryl esters [ST0102]	SISE	Sitosterol ester	[M+NH4]+	SE 29:1/18:1	SISE 18:1	C47H82O2	ST 29:1+ (m/z 397.386, 1000, C29H49+)	-	CCCCCC\C=C/CCCCCCCCCC(=O)OC1CCC2(C)C3CCC4(C)C(CCC4C3CC=C2C1)C(C)CCC(CC)C(C)C	YLJLWRPYEWEZAG-PFONDFGANA-N	Literature based	https://www.sciencedirect.com/science/article/pii/S1387380614000724
	Sterol Lipids [ST]	Sterols [ST01]	Steryl esters [ST0102]	STSE	Stigmasterol ester	[M+NH4]+	SE 29:2/18:1	STSE 18:2	C47H78O2	ST 29:2+ (m/z 395.363, 1000, C29H47+)	-	CCCCC\C=C\C=C\CCCCCCCCC(=O)OC1CCC2(C)C3CCC4(C)C(CCC4C3CC=C2C1)C(C)C=CC(CC)C(C)C	WMMBMZBOWDZYOU-RJZTVXSDNA-N	Literature based	https://www.sciencedirect.com/science/article/pii/S1387380614000724
	Sterol Lipids [ST]	Sterols [ST01]	Stigmasterols and C24-ethyl derivatives [ST0104]	ST	Sitosterol	[M+H]+, [M+NH4]+, [M-H2O+H]+	ST 29:1;O	Sitosterol	C29H50O	ST 29:1+ (m/z 397.3829, 1000, C29H49+)	-	OC1CC2=CCC3C(CCC4(C)C(CCC34)C(C)CCC(CC)C(C)C)C2(C)CC1	KZJWDPNRJALLNS-UHFFFAOYSA-N		only by the precursor m/z value	This study
	Sterol Lipids [ST]	Sterols [ST01]	Stigmasterols and C24-ethyl derivatives [ST0104]	ST	Stigmasterol	[M+H]+, [M+NH4]+, [M-H2O+H]+	ST 29:2;O	Stigmasterol	C29H48O	ST 29:2+ (m/z 395.3672, 1000, C29H47+)	-	OC1CC2=CCC3C(CCC4(C)C(CCC34)C(C=CC(CC)C(C)C)C)C2(C)CC1	HCXVJBMSMIARIN-UHFFFAOYSA-N		only by the precursor m/z value	This study
	Sterol Lipids [ST]	Sterols [ST01]		DEGSE	Dehydroergosterol ester	[M+H]+, [M+NH4]+, [M+Na]+	SE 28:4/18:1	DEGSE 18:1	C46H74O2	ST 28:4+(m/z 377.320, 1000, C28H41+)	-	O=C(OC1CC2=CC=C3C(=CCC4(C)C3CCC4C(C=CC(C)C(C)C)C)C2(C)CC1)CCCCCCCC=CCCCCCCCC	BQQDVWVYMCDTIT-UHFFFAOYSA-N	Literature based	https://www.frontiersin.org/articles/10.3389/fchem.2018.00342/full	This study
	Sterol Lipids [ST]	Sterols [ST01]		DSMSE	Desmosterol ester	[M+H]+, [M+NH4]+, [M+Na]+	SE 27:2/18:1	DSMSE 18:1	C45H76O2	ST 27:2+(m/z 367.336, 1000, C27H43+)	-	O=C(OC1CC2=CCC3C(CCC4(C)C(CCC34)C(C)CCC=C(C)C)C2(C)CC1)CCCCCCCC=CCCCCCCCC	TZIBSSODYIYCPE-UHFFFAOYSA-N	Literature based	https://www.frontiersin.org/articles/10.3389/fchem.2018.00342/full	This study
	Sterol Lipids [ST]	Sterols [ST01]		EGSE	Ergosterol ester	[M+H]+, [M+NH4]+, [M+Na]+	SE 28:3/18:1	EGSE 18:1	C46H76O2	ST 28:3+(m/z 379.336, 1000, C28H43+)	-	O=C(OC1CC2=CC=C3C(CCC4(C)C3CCC4C(C=CC(C)C(C)C)C)C2(C)CC1)CCCCCCCC=CCCCCCCCC	VVZNLLXLOKRQPH-UHFFFAOYSA-N	Literature based	https://www.frontiersin.org/articles/10.3389/fchem.2018.00342/full	This study

## Sheet: Table S5
	Table S5a. MS-DIAL parameters for positive ion mode data
	Table S5b. MS-DIAL parameters for negative ion mode data

## Sheet: Table S6
	Table S6. The detail of adduct form used for lipid quantification
	Name of internal standard	Name of internal standard's lipid class	Target lipid class for normalization	Adduct form used for quantification
	LPC 18:1(d7)	LPC	ADGGA	[M-H]-
	CE 18:1(d7)	CE	AHexBRS	[M+CH3COO]-
	CE 18:1(d7)	CE	AHexCAS	[M+CH3COO]-
	Cer 18:1;2O/15:0(d7)	Cer-NS	AHexCer	[M+CH3COO]-
	CE 18:1(d7)	CE	AHexCS	[M+CH3COO]-
	CE 18:1(d7)	CE	AHexSIS	[M+CH3COO]-
	CE 18:1(d7)	CE	AHexSTS	[M+CH3COO]-
	SM 18:1;2O/18:1(d9)	SM	ASM	[M+CH3COO]-
	LPC 18:1(d7)	LPC	BASulfate	[M-H]-
	LPC 18:1(d7)	LPC	BileAcid	[M-H]-
	PG 15:0_18:1(d7)	PG	BMP	[M+NH4]+
	CE 18:1(d7)	CE	BRSE	[M+NH4]+
	LPC 18:1(d7)	LPC	CAR	[M+H]+
	CE 18:1(d7)	CE	CASE	[M+NH4]+
	CE 18:1(d7)	CE	CE	[M+NH4]+
	Cer 18:1;2O/15:0(d7)	Cer-NS	Cer_ADS	[M+CH3COO]-
	Cer 18:1;2O/15:0(d7)	Cer-NS	Cer_AP	[M+CH3COO]-
	Cer 18:1;2O/15:0(d7)	Cer-NS	Cer_AS	[M+CH3COO]-
	Cer 18:1;2O/15:0(d7)	Cer-NS	Cer_BDS	[M+CH3COO]-
	Cer 18:1;2O/15:0(d7)	Cer-NS	Cer_BS	[M+CH3COO]-
	Cer 18:1;2O/15:0(d7)	Cer-NS	Cer_EBDS	[M+CH3COO]-
	Cer 18:1;2O/15:0(d7)	Cer-NS	Cer_EODS	[M+CH3COO]-
	Cer 18:1;2O/15:0(d7)	Cer-NS	Cer_EOS	[M+CH3COO]-
	Cer 18:1;2O/15:0(d7)	Cer-NS	Cer_NDS	[M+CH3COO]-
	Cer 18:1;2O/15:0(d7)	Cer-NS	Cer_NP	[M+CH3COO]-
	Cer 18:1;2O/15:0(d7)	Cer-NS	Cer_NS	[M+CH3COO]-
	LPC 18:1(d7)	LPC	ST	[M+H-H2O]+
	PG 15:0_18:1(d7)	PG	CL	[M-H]-
	LPC 18:1(d7)	LPC	CoQ	[M+H]+
	CE 18:1(d7)	CE	DCAE	[M+NH4]+
	CE 18:1(d7)	CE	DEGSE	[M+NH4]+
	DG 15:0_18:1(d7)	DG	DG	[M+NH4]+
	LPC 18:1(d7)	LPC	DGCC	[M+H]+
	LPC 18:1(d7)	LPC	DGDG	[M+CH3COO]-
	LPC 18:1(d7)	LPC	DGGA	[M-H]-
	LPC 18:1(d7)	LPC	DGMG	[M+CH3COO]-
	LPC 18:1(d7)	LPC	DGTS	[M+H]+
	Cer 18:1;2O/15:0(d7)	Cer-NS	DHSph	[M+H]+
	PG 15:0_18:1(d7)	PG	DLCL	[M-H]-
	PE 15:0_18:1(d7)	PE	DMPE	[M-H]-
	CE 18:1(d7)	CE	DSMSE	[M+NH4]+
	CE 18:1(d7)	CE	EGSE	[M+NH4]+
	DG 15:0_18:1(d7)	DG	EtherDG	[M+NH4]+
	LPC 18:1(d7)	LPC	EtherDGDG	[M+CH3COO]-
	LPC 18:1(d7)	LPC	EtherLPC	[M+H]+
	LPE 18:1(d7)	LPE	EtherLPE	[M+H]+
	PG 15:0_18:1(d7)	PG	EtherLPG	[M-H]-
	LPC 18:1(d7)	LPC	EtherMGDG	[M+CH3COO]-
	PC 15:0_18:1(d7)	PC	EtherOxPC	[M+CH3COO]-
	PE 15:0_18:1(d7)	PE	EtherOxPE	[M-H]-
	PC 15:0_18:1(d7)	PC	EtherPC	[M+CH3COO]-
	PE 15:0_18:1(d7)	PE	EtherPE	[M-H]-
	PG 15:0_18:1(d7)	PG	EtherPG	[M-H]-
	PI 15:0_18:1(d7)	PI	EtherPI	[M-H]-
	PS 15:0_18:1(d7)	PS	EtherPS	[M-H]-
	Cer 18:1;2O/15:0(d7)	Cer-NS	EtherSMGDG	[M-H]-
	TG 15:0_18:1(d7)_15:0	TG	EtherTG	[M+NH4]+
	FA 18:0(d3)	FA	FA	[M-H]-
	FA 18:0(d3)	FA	FAHFA	[M-H]-
	LPC 18:1(d7)	LPC	GD1a	[M-H]-
	LPC 18:1(d7)	LPC	GD1b	[M-H]-
	LPC 18:1(d7)	LPC	GD2	[M-H]-
	LPC 18:1(d7)	LPC	GD3	[M-H]-
	LPC 18:1(d7)	LPC	GM1	[M-H]-
	LPC 18:1(d7)	LPC	GM3	[M+NH4]+
	LPC 18:1(d7)	LPC	GPNAE	[M-H]-
	LPC 18:1(d7)	LPC	GQ1b	[M-2H]2-
	LPC 18:1(d7)	LPC	GT1b	[M-2H]2-
	PG 15:0_18:1(d7)	PG	HBMP	[M+NH4]+
	Cer 18:1;2O/15:0(d7)	Cer-NS	Hex2Cer	[M+H]+
	Cer 18:1;2O/15:0(d7)	Cer-NS	Hex3Cer	[M+H]+
	Cer 18:1;2O/15:0(d7)	Cer-NS	HexCer_AP	[M+H]+
	Cer 18:1;2O/15:0(d7)	Cer-NS	HexCer_EOS	[M+H]+
	Cer 18:1;2O/15:0(d7)	Cer-NS	HexCer_HDS	[M+H]+
	Cer 18:1;2O/15:0(d7)	Cer-NS	HexCer_HS	[M+H]+
	Cer 18:1;2O/15:0(d7)	Cer-NS	HexCer_NDS	[M+H]+
	Cer 18:1;2O/15:0(d7)	Cer-NS	HexCer_NS	[M+H]+
	CE 18:1(d7)	CE	KDCAE	[M+NH4]+
	CE 18:1(d7)	CE	KLCAE	[M+NH4]+
	CE 18:1(d7)	CE	LCAE	[M+NH4]+
	LPC 18:1(d7)	LPC	LDGCC	[M+H]+
	LPC 18:1(d7)	LPC	LDGTS	[M+H]+
	PE 15:0_18:1(d7)	PE	LNAPE	[M-H]-
	PS 15:0_18:1(d7)	PS	LNAPS	[M-H]-
	LPC 18:1(d7)	LPC	LPA	[M-H]-
	LPC 18:1(d7)	LPC	LPC	[M+H]+
	LPE 18:1(d7)	LPE	LPE	[M+H]+
	PG 15:0_18:1(d7)	PG	LPG	[M-H]-
	PI 15:0_18:1(d7)	PI	LPI	[M-H]-
	PS 15:0_18:1(d7)	PS	LPS	[M-H]-
	MG 18:1(d7)	MG	MG	[M+NH4]+
	LPC 18:1(d7)	LPC	MGDG	[M+CH3COO]-
	LPC 18:1(d7)	LPC	MGMG	[M+CH3COO]-
	PI 15:0_18:1(d7)	PI	MIPC	[M-H]-
	PG 15:0_18:1(d7)	PG	MLCL	[M-H]-
	PE 15:0_18:1(d7)	PE	MMPE	[M-H]-
	LPC 18:1(d7)	LPC	NAE	[M+CH3COO]-
	LPC 18:1(d7)	LPC	NAGly	[M+NH4]+
	LPC 18:1(d7)	LPC	NAGlySer	[M+NH4]+
	LPC 18:1(d7)	LPC	NAOrn	[M+H]+
	LPC 18:1(d7)	LPC	NGcGM3	[M-H]-
	FA 18:0(d3)	FA	OxFA	[M-H]-
	PC 15:0_18:1(d7)	PC	OxPC	[M+CH3COO]-
	PE 15:0_18:1(d7)	PE	OxPE	[M-H]-
	PG 15:0_18:1(d7)	PG	OxPG	[M-H]-
	PI 15:0_18:1(d7)	PI	OxPI	[M-H]-
	PS 15:0_18:1(d7)	PS	OxPS	[M-H]-
	TG 15:0_18:1(d7)_15:0	TG	OxTG	[M+NH4]+
	LPC 18:1(d7)	LPC	PA	[M-H]-
	PC 15:0_18:1(d7)	PC	PC	[M+CH3COO]-
	PE 15:0_18:1(d7)	PE	PE	[M-H]-
	Cer 18:1;2O/15:0(d7)	Cer-NS	PE_Cer	[M-H]-
	LPC 18:1(d7)	LPC	PEtOH	[M-H]-
	PG 15:0_18:1(d7)	PG	PG	[M-H]-
	Cer 18:1;2O/15:0(d7)	Cer-NS	PhytoSph	[M+H]+
	PI 15:0_18:1(d7)	PI	PI	[M-H]-
	Cer 18:1;2O/15:0(d7)	Cer-NS	PI_Cer	[M-H]-
	LPC 18:1(d7)	LPC	PMeOH	[M-H]-
	PS 15:0_18:1(d7)	PS	PS	[M-H]-
	LPC 18:1(d7)	LPC	SHex	[M+CH3COO]-
	Cer 18:1;2O/15:0(d7)	Cer-NS	SHexCer	[M+H]+
	CE 18:1(d7)	CE	SISE	[M+NH4]+
	Cer 18:1;2O/15:0(d7)	Cer-NS	SL	[M-H]-
	SM 18:1;2O/18:1(d9)	SM	SM	[M+CH3COO]-
	Cer 18:1;2O/15:0(d7)	Cer-NS	SMGDG	[M-H]-
	Cer 18:1;2O/15:0(d7)	Cer-NS	Sph	[M+H]+
	LPC 18:1(d7)	LPC	SQDG	[M+NH4]+
	LPC 18:1(d7)	LPC	SSulfate	[M-H]-
	CE 18:1(d7)	CE	ST	[M+NH4]+
	CE 18:1(d7)	CE	STSE	[M+NH4]+
	CE 18:1(d7)	CE	TDCAE	[M+NH4]+
	TG 15:0_18:1(d7)_15:0	TG	TG	[M+NH4]+
	TG 15:0_18:1(d7)_15:0	TG	TG_EST	[M+NH4]+
	LPC 18:1(d7)	LPC	VAE	[M+Na]+
	LPC 18:1(d7)	LPC	Vitamin_D	[M+H]+
	LPC 18:1(d7)	LPC	Vitamin_E	[M+CH3COO]-
