# Supplementary material for: A lipidome landscape of aging in mice
Source: Research Square preprint supplement (doi:10.21203/rs.3.rs-2139359/v1), 2022-10-26
Supplement: Supplementary file 3 [file a667df96da305340a9379741.xlsx]

## Sheet: Kidney
																															Year (month)	2	12	2	2	19	2	12	19	19	19	19	12	19	24	19	12	12	24
																															Male/Female	Female	Male	Female	Male	Female	Female	Female	Female	Male	Male	Male	Female	Female	Male	Female	Male	Male	Male
																															SPF/germ free	GF	SPF	SPF	GF	SPF	GF	SPF	GF	GF	SPF	GF	SPF	GF	SPF	SPF	SPF	GF	GF
																															Unit	pmol/mg tissue	pmol/mg tissue	pmol/mg tissue	pmol/mg tissue	pmol/mg tissue	pmol/mg tissue	pmol/mg tissue	pmol/mg tissue	pmol/mg tissue	pmol/mg tissue	pmol/mg tissue	pmol/mg tissue	pmol/mg tissue	pmol/mg tissue	pmol/mg tissue	pmol/mg tissue	pmol/mg tissue	pmol/mg tissue
																															Class name	2M_F_GF	12M_M_SPF	2M_F_SPF	2M_M_GF	19M_F_SPF	2M_F_GF	12M_F_SPF	19M_F_GF	19M_M_GF	19M_M_SPF	19M_M_GF	12M_F_SPF	19M_F_GF	24M_M_SPF	19M_F_SPF	12M_M_SPF	12M_M_GF	24M_M_GF
																															File type	Sample	Sample	Sample	Sample	Sample	Sample	Sample	Sample	Sample	Sample	Sample	Sample	Sample	Sample	Sample	Sample	Sample	Sample
Alignment ID	Average Rt(min)	Average Mz	Metabolite name	Adduct type	Post curation result	Fill %	MS/MS assigned	Reference RT	Reference m/z	Formula	Ontology	INCHIKEY	SMILES	Annotation tag (VS1.0)	RT matched	m/z matched	MS/MS matched	Comment	Manually modified for quantification	Manually modified for annotation	Isotope tracking parent ID	Isotope tracking weight number	Total score	RT similarity	Dot product	Reverse dot product	Fragment presence %	S/N average	Spectrum reference file name	MS1 isotopic spectrum	MS/MS spectrum	190628_TT1_Hclass_Aging_001_38_9w_GF_F_Kidney_2_Pos	190628_TT1_Hclass_Aging_002_4_12M_SPF_M_Kidney_1_Pos	190628_TT1_Hclass_Aging_003_27_9w_SPF_F_Kidney_3_Pos	190628_TT1_Hclass_Aging_004_14_9w_GF_M_Kidney_2_Pos	190628_TT1_Hclass_Aging_005_33_18M_SPF_F_Kidney_3_Pos	190628_TT1_Hclass_Aging_006_39_9w_GF_F_Kidney_3_Pos	190628_TT1_Hclass_Aging_007_28_12M_SPF_F_Kidney_1_Pos	190628_TT1_Hclass_Aging_008_43_18M_GF_F_Kidney_1_Pos	190628_TT1_Hclass_Aging_009_20_18M_GF_M_Kidney_3_Pos	190628_TT1_Hclass_Aging_010_8_18M_SPF_M_Kidney_3_Pos	190628_TT1_Hclass_Aging_011_19_18M_GF_M_Kidney_2_Pos	190628_TT1_Hclass_Aging_012_29_12M_SPF_F_Kidney_2_Pos	190628_TT1_Hclass_Aging_013_45_18M_GF_F_Kidney_3_Pos	190628_TT1_Hclass_Aging_014_11_24M_SPF_M_Kidney_4_Pos	190628_TT1_Hclass_Aging_015_31_18M_SPF_F_Kidney_1_Pos	190628_TT1_Hclass_Aging_016_6_12M_SPF_M_Kidney_3_Pos	190628_TT1_Hclass_Aging_017_18_12M_GF_M_Kidney_3_Pos	190628_TT1_Hclass_Aging_018_24_24M_GF_M_Kidney_3_Pos
926	1.381	288.215	CAR 8:0	[M+H]+		0.589	TRUE	1.37	288.217	C15H29NO4	CAR	CXTATJFJDMJMIY-UHFFFAOYSA-N	O=C([O-])CC(OC(=O)CCCCCCC)C[N+](C)(C)C	310	TRUE	TRUE	TRUE		FALSE	FALSE	null	null	100	100	37.1	48.1	100	8.04	190628_TT1_Hclass_Aging_017_18_12M_GF_M_Kidney_3_Pos	288.21692:1008 289.22027:212 290.22363:36	84.0797:2 85.02545:85 91.05187:6 116.98844:1 119.08456:5 141.03947:1 216.11346:1 229.14922:2 235.19116:1 288.21451:4	0.280648	0.304716	0.245967	0.21746	0.159755	0.391891	0.300066	0.178449	0.16493	0.153571	0.170347	0.657171	0.158738	0.16891	0.149278	0.253827	0.283196	0.295383
969	6.296	300.288	SPB 18:1;2O	[M+H]+	adduct linked to 903_[M+H-H2O]+	0.946	TRUE	6.33	300.29	C18H37NO2	Sph	WWUZIQQURGPMPG-UHFFFAOYSA-N	OCC(N)C(O)C=CCCCCCCCCCCCCC	310	TRUE	TRUE	TRUE		FALSE	FALSE	null	null	100	100	71.7	90.8	100	31.53	190628_TT1_Hclass_Aging_035_16_12M_GF_M_Kidney_1_Pos	300.28766:1356 301.29101:552 302.29437:184	71.05065:10 79.04876:12 91.05123:12 93.07473:12 205.18501:10 252.25597:12 252.26489:36 256.83179:10 264.25595:12 282.27161:24	1.71895	3.93922	1.68317	3.11888	1.31863	2.44649	2.97798	1.81316	4.11016	2.72594	3.09296	3.36556	1.60788	3.08269	1.41759	4.08163	3.28041	2.14631
1031	3.275	316.247	CAR 10:0	[M+H]+		0.232	TRUE	2.59	316.248	C17H33NO4	CAR	LZOSYCMHQXPBFU-UHFFFAOYSA-N	O=C([O-])CC(OC(=O)CCCCCCCCC)C[N+](C)(C)C	410	TRUE	TRUE	TRUE		FALSE	FALSE	null	null	93.7	94.2	56.2	15.6	100	15.2	190628_TT1_Hclass_Aging_QC_Pos_01	316.24899:836 317.25234:343 318.2557:73	81.06903:10 85.02636:91 106.06558:10 250.99387:10	0.1242	0.133699	0.105886	0.0873359	0.0585503	0.195665	0.236131	0.107403	0.083028	0.0929727	0.0901665	0.244535	0.0973262	0.0861328	0.0579378	0.115702	0.125022	0.146053
1209	6.867	348.311	MG 16:0	[M+NH4]+	adduct linked to 1019_[M+H-H2O]+; adduct linked to 1118_[M+H]+; adduct linked to 1229_[M+Na]+	0.964	TRUE	6.61	348.311	C19H38O4	MG	QHZLMUACJMDIAE-UHFFFAOYSA-N	O=C(OCC(O)CO)CCCCCCCCCCCCCCC	310	TRUE	TRUE	TRUE		FALSE	FALSE	null	null	98.6	99.2	38.7	75.6	100	179.66	190628_TT1_Hclass_Aging_006_39_9w_GF_F_Kidney_3_Pos	348.31232:8040 349.31567:3794 350.31903:777	71.08426:211 81.0668:131 83.08289:130 85.09914:262 93.07123:12 95.08546:170 97.10052:60 98.98308:24 101.06278:12 109.10186:91 123.10348:12 123.11282:48 137.1257:36 157.09081:10 239.22087:12 239.23389:60 257.23758:24 313.25443:12 313.27179:320	7.90154	5.24986	7.679	6.14137	4.97233	6.50683	5.67371	9.77152	5.45516	4.80242	5.87044	3.23809	8.24057	5.93561	4.60456	5.97103	4.09837	4.22671
1336	8.783	369.352	ST 27:1;O	[M+H-H2O]+	adduct linked to 1612_[M+NH4]+; similar chromatogram in higher mz_4191; similar chromatogram in higher mz_7269; found in higher mz's MsMs_7269; found in higher mz's MsMs_4978; found in higher mz's MsMs_1612	0.946	TRUE	9	369.352	C27H46O	ST	HVYWMOMLDIMFJA-UHFFFAOYSA-N	OC1CC2=CCC3C(CCC4(C)C(CCC34)C(C)CCCC(C)C)C2(C)CC1	310	TRUE	TRUE	TRUE		FALSE	FALSE	null	null	100	99.4	88.5	87.5	100	511.62	190628_TT1_Hclass_Aging_041_46_24M_GF_F_Kidney_2_Pos	369.35089:40025 370.35424:17024 371.3576:2483	71.08632:36 77.03592:12 79.05145:12 81.06901:160 83.08257:77 85.10659:12 91.05547:62 93.06819:107 95.08513:209 97.10157:60 105.07087:178 107.07817:24 107.08688:102 109.0986:169 111.10833:24 117.06534:24 119.08404:118 121.09838:48 123.1156:36 129.07428:12 131.09554:12 133.09853:164 135.1134:185 144.09308:12 145.10378:60 147.11362:316 149.13387:127 151.15063:24 158.1051:12 159.11592:60 161.13474:39…	14.9269	94.6367	14.0439	43.7492	120.666	112.979	63.9822	36.6039	122.687	73.9947	68.1801	180.142	32.4555	64.3322	186.021	59.5734	254.565	617.121
1337	7.076	369.352	ST 27:1;O	[M+H-H2O]+	found in higher mz's MsMs_6974; found in higher mz's MsMs_2237; similar chromatogram in higher mz_2853; found in higher mz's MsMs_2357	0.946	TRUE	9	369.352	C27H46O	ST	HVYWMOMLDIMFJA-UHFFFAOYSA-N	OC1CC2=CCC3C(CCC4(C)C(CCC34)C(C)CCCC(C)C)C2(C)CC1	410	TRUE	TRUE	TRUE		FALSE	FALSE	null	null	100	63.2	90.1	72.1	100	126.44	190628_TT1_Hclass_Aging_013_45_18M_GF_F_Kidney_3_Pos	369.35104:15927 370.35439:10689 371.35775:1304	81.06607:24 81.06986:102 83.08599:48 91.05104:48 93.06643:48 95.08472:110 97.09839:36 105.06902:69 107.08647:114 109.10259:105 117.06341:12 119.08364:48 121.10261:24 123.11209:36 125.13182:12 131.07909:24 133.10136:103 135.10976:48 135.11629:99 145.09494:12 145.10001:36 147.11494:243 149.13177:36 151.15717:24 159.11024:12 161.13615:157 173.13774:36 175.14493:77 179.179:12 185.1348:24 189.16199:24…	5.4078	20.095	2.59883	14.5541	24.05	43.3025	11.8698	11.8251	37.3594	18.6954	20.0323	34.2527	12.8188	16.819	30.2721	13.5419	63.4005	174.765
1343	4.749	370.295	CAR 14:1	[M+H]+		0.196	TRUE	4.8	370.295	C21H39NO4	CAR	ABVVZYXTZLEOHP-UHFFFAOYSA-N	O=C([O-])CC(OC(=O)CCCCCCCC=CCCCC)C[N+](C)(C)C	310	TRUE	TRUE	TRUE		FALSE	FALSE	null	null	100	100	70.2	70.2	100	52.98	190628_TT1_Hclass_Aging_029_42_12M_GF_F_Kidney_3_Pos	370.29498:4396 371.29833:6822 372.30169:1931	85.02189:24 85.02707:271 370.28909:48	0.741051	0.806012	0.563626	0.443127	0.316066	0.773691	1.06785	1.00631	1.27666	0.815725	1.35367	0.96734	1.08347	0.717307	0.305947	0.669995	0.794242	1.63143
1344	4.837	370.297	CAR 14:1	[M+H]+		0.75	TRUE	4.8	370.295	C21H39NO4	CAR	ABVVZYXTZLEOHP-UHFFFAOYSA-N	O=C([O-])CC(OC(=O)CCCCCCCC=CCCCC)C[N+](C)(C)C	310	TRUE	TRUE	TRUE		FALSE	FALSE	null	null	100	100	77.8	81.5	100	47.59	190628_TT1_Hclass_Aging_QC_Pos_01	370.29376:5781 371.29711:6320 372.30047:1789	81.07036:12 85.02643:344 93.06825:12 144.92456:10 370.29343:121	0.741051	0.648806	0.554927	0.428766	0.306263	0.731923	1.0383	0.96024	1.23107	0.816555	1.34897	0.941862	1.04427	0.694935	0.307721	0.663118	0.751257	1.57983
1394	6.536	372.308	MG 18:2	[M+NH4]+	adduct linked to 1420_[M+Na]+; adduct linked to 1249_[M+H]+	0.589	TRUE	6.45	372.311	C21H38O4	MG	WECGLUPZRHILCT-UHFFFAOYSA-N	O=C(OCC(O)CO)CCCCCCCC=CCC=CCCCCC	310	TRUE	TRUE	TRUE		FALSE	FALSE	null	null	96.7	99.9	11.3	75.7	100	13.18	190628_TT1_Hclass_Aging_035_16_12M_GF_M_Kidney_1_Pos	372.30984:14413 373.31319:7351 374.31655:1913	77.03332:12 79.05256:36 81.06886:48 91.04728:24 95.07949:24 95.08497:24 97.10002:24 101.05945:12 107.08379:12 109.10134:36 119.0823:24 123.11384:12 129.05016:12 133.08858:12 137.13499:12 149.12675:24 161.13091:12 175.14497:12 221.19347:12 263.23752:24 266.99124:12 283.0527:10 337.2702:24	2.01342	3.06546	1.63781	1.91256	2.60089	1.80395	2.6259	4.79903	2.28536	2.57386	2.79623	2.36278	1.96749	2.20514	1.97064	3.21379	4.7213	2.56317
1395	5.3	372.311	CAR 14:0	[M+H]+		0.946	TRUE	5.58	372.311	C21H41NO4	CAR	PSHXNVGSVNEJBD-UHFFFAOYSA-N	O=C([O-])CC(OC(=O)CCCCCCCCCCCCC)C[N+](C)(C)C	310	TRUE	TRUE	TRUE		FALSE	FALSE	null	null	100	99	60	79.4	100	65.11	190628_TT1_Hclass_Aging_003_27_9w_SPF_F_Kidney_3_Pos	372.30988:15160 373.31323:9908 374.31659:1852	85.02813:419 109.10207:10 144.09537:12 229.21481:24 266.99695:12 313.24005:36 340.03445:10 372.30682:123	5.93065	3.55315	4.5474	3.34045	2.32188	5.62748	4.24042	3.98971	4.48576	4.35007	4.94535	5.02197	5.89715	3.28983	1.99442	3.8645	3.86417	5.47905
1409	6.99	374.326	MG 18:1	[M+NH4]+	similar chromatogram in higher mz_1706; similar chromatogram in higher mz_3463; adduct linked to 1159_[M+H-H2O]+; adduct linked to 1428_[M+Na]+	0.411	TRUE	6.84	374.327	C21H40O4	MG	RZRNAYUHWVFMIP-UHFFFAOYSA-N	O=C(OCC(O)CO)CCCCCCCC=CCCCCCCCC	310	TRUE	TRUE	TRUE		FALSE	FALSE	null	null	100	99.8	18.4	56.3	100	40.35	190628_TT1_Hclass_Aging_QC_Pos_03	374.32419:4270 375.32754:1732 376.3309:378	81.0655:12 83.04832:24 87.04264:24 93.06309:12 107.07852:12 111.11461:24 115.03718:36 123.116:12 135.11385:24 217.13965:10 247.237:24 265.24823:48 339.28729:24 357.25729:24	1.72371	2.46817	1.00295	1.57658	1.74844	1.48103	1.97937	4.30114	1.76659	1.83646	1.60722	2.22683	2.04499	1.73654	1.74396	2.23914	5.77856	1.70878
1417	7.443	376.342	MG 18:0	[M+NH4]+	adduct linked to 1277_[M+H]+	1	TRUE	7.38	376.342	C21H42O4	MG	VBICKXHEKHSIBG-UHFFFAOYSA-N	O=C(OCC(O)CO)CCCCCCCCCCCCCCCCC	310	TRUE	TRUE	TRUE		FALSE	FALSE	null	null	100	100	66.6	75.7	100	839.97	190628_TT1_Hclass_Aging_003_27_9w_SPF_F_Kidney_3_Pos	376.34097:55434 377.34432:31173 378.34768:4895	71.08545:333 75.03944:12 79.05427:24 81.06807:160 83.08033:48 83.08417:185 85.09915:351 95.08409:205 96.02502:10 97.09775:138 99.11574:36 103.07434:24 109.1004:169 111.11606:48 113.1248:24 121.10334:10 123.11593:48 137.13554:48 201.17168:10 267.26248:48 285.27203:60 341.29764:1780	48.6501	28.6257	50.1328	34.7933	28.1921	35.7431	29.7412	63.1655	32.0903	29.044	35.1005	17.635	57.4592	31.1073	29.3103	33.4426	23.5493	25.4166
1440	6.946	381.37	MG 18:1(d7)	[M+NH4]+	adduct linked to 1203_[M+H-H2O]+; adduct linked to 1310_[M+H]+; adduct linked to 1471_[M+H]+; adduct linked to 4414_[2M+NH4]+; adduct linked to 4464_[2M+Na]+	0.982	TRUE	6.95	381.37	C21H33O4	MG	RZRNAYUHWVFMIP-IJGLUQEONA-N	OCC([H])(O)COC(CCCCCCC/C=C\CCCCCC([2H])([2H])C([2H])([2H])C([2H])([2H])[2H])=O	annotated by user-defined text library	TRUE	TRUE	FALSE		TRUE	FALSE	null	null	100	100	null	null	null	8601.39	190628_TT1_Hclass_Aging_007_28_12M_SPF_F_Kidney_1_Pos	381.37039:331814 382.37374:155751 383.3771:21652	70.07468:587 71.04708:60 71.0802:312 72.08931:531 73.09474:587 74.06848:24 74.10109:408 75.04258:179 75.10945:181 76.11606:129 77.03574:251 77.12321:36 78.0415:24 78.12829:48 78.8057:36 79.05378:1175 80.05751:60 81.06884:2680 82.07381:458 83.04916:48 83.08497:1395 84.08945:620 85.06372:68 85.0922:352 86.1061:292 87.11029:280 88.11503:347 89.12421:178 90.12981:300 91.05534:221 92.10675:69 92.14446…	275.035	275.035	275.035	275.035	275.035	275.035	275.035	275.035	275.035	275.035	275.035	275.035	275.035	275.035	275.035	275.035	275.035	275.035
1462	7.336	385.343	ST 27:2;O	[M+H]+	adduct linked to 1318_[M+H-H2O]+	0.857	TRUE	7.85	385.346	C27H44O	ST	AVSXSVCZWQODGV-UHFFFAOYSA-N	OC1CC2=CCC3C(CCC4(C)C(CCC34)C(C)CCC=C(C)C)C2(C)CC1	410	TRUE	TRUE	TRUE		FALSE	FALSE	null	null	100	96.7	68.8	45.6	100	49	190628_TT1_Hclass_Aging_QC_Pos_03	385.34662:5329 386.34997:7546 387.35333:2048	71.08395:36 81.06901:60 83.08257:24 93.07225:24 95.08513:81 97.10156:24 101.05821:10 107.0767:12 119.07943:12 119.09015:24 122.0204:10 129.07108:12 131.08749:48 133.0985:36 137.14342:12 143.08421:24 145.09698:36 147.12039:48 149.12526:12 159.11588:113 161.12935:36 171.08551:12 171.11304:36 173.13249:60 183.11304:10 185.13889:12 197.12987:10 199.14447:36 201.16534:24 211.14536:10 213.16257:24 215.…	1.42705	6.60337	1.35106	3.3449	9.68846	9.72722	5.5112	4.48838	7.97106	5.46113	5.01981	13.7196	3.82866	2.68713	14.7427	4.01097	11.8402	21.9085
1463	8.521	385.345	ST 27:2;O	[M+H]+	similar chromatogram in higher mz_1851; similar chromatogram in higher mz_4214; similar chromatogram in higher mz_4062	0.946	TRUE	7.85	385.346	C27H44O	ST	AVSXSVCZWQODGV-UHFFFAOYSA-N	OC1CC2=CCC3C(CCC4(C)C(CCC34)C(C)CCC=C(C)C)C2(C)CC1	410	TRUE	TRUE	TRUE		FALSE	FALSE	null	null	100	94.5	94.8	85.1	100	193.24	190628_TT1_Hclass_Aging_042_26_9w_SPF_F_Kidney_2_Pos	385.34607:23372 386.34942:12182 387.35278:2311	77.04313:12 79.05251:60 81.06755:83 83.04784:36 91.05925:24 93.06795:48 95.08761:60 97.06674:497 101.06358:10 105.06769:36 107.08221:36 109.06458:579 119.09133:12 121.09646:36 123.08408:67 131.08067:36 131.10155:12 133.09808:36 137.12328:12 143.09048:12 145.09822:48 147.11993:48 149.12651:36 157.09344:12 159.11714:48 161.1324:36 163.11374:36 163.1478:24 171.12349:12 175.1465:48 177.12791:36 183.1…	6.89426	37.6924	6.2744	13.9934	34.9085	48.3595	26.344	19.4999	45.4554	23.5519	19.5701	70.3676	16.0269	21.737	76.3406	21.2552	81.2701	204.706
1464	7.816	385.345	ST 27:2;O	[M+H]+	ion correlated with 1714; adduct linked to 1317_[M+H-H2O]+; similar chromatogram in higher mz_1714; found in higher mz's MsMs_1714; found in higher mz's MsMs_1607; similar chromatogram in higher mz_2882; similar chromatogram in higher mz_6034	0.804	TRUE	7.85	385.346	C27H44O	ST	AVSXSVCZWQODGV-UHFFFAOYSA-N	OC1CC2=CCC3C(CCC4(C)C(CCC34)C(C)CCC=C(C)C)C2(C)CC1	310	TRUE	TRUE	TRUE		FALSE	FALSE	null	null	100	100	69.4	54.9	100	85.07	190628_TT1_Hclass_Aging_QC_Pos_05	385.34488:10721 386.34823:7257 387.35159:1458	71.08425:24 77.03747:24 79.05303:60 81.07188:48 83.0842:24 91.04648:12 91.05317:24 93.06723:24 95.08553:60 103.0545:12 105.0713:95 109.09759:24 112.00097:10 119.08913:24 121.10815:12 123.11767:36 128.06134:12 131.07681:12 131.08646:60 133.10231:36 135.1205:24 137.23277:10 143.09323:24 145.09422:24 147.11765:70 149.10536:12 157.09816:24 159.11127:60 161.13185:48 163.14188:24 169.09889:12 169.10435…	3.59837	16.4063	3.11568	7.46419	18.392	16.1406	12.8066	11.0899	15.2516	9.16261	8.5123	32.3551	8.29316	4.09829	27.5839	9.78083	26.7369	28.1078
1465	8.144	385.346	ST 27:2;O	[M+H]+	ion correlated with 1599; similar chromatogram in higher mz_1468; similar chromatogram in higher mz_4133; similar chromatogram in higher mz_7078	0.5	TRUE	7.85	385.346	C27H44O	ST	AVSXSVCZWQODGV-UHFFFAOYSA-N	OC1CC2=CCC3C(CCC4(C)C(CCC34)C(C)CCC=C(C)C)C2(C)CC1	310	TRUE	TRUE	TRUE		FALSE	FALSE	null	null	95.8	98.9	84.2	24.8	100	92.14	190628_TT1_Hclass_Aging_028_9_18M_SPF_M_Kidney_4_Pos	385.34579:4120 386.34914:1621 387.3525:391	79.0555:24 83.08673:24 91.05047:12 95.08687:24 105.06408:12 107.08875:24 119.0845:12 121.09885:24 129.0668:12 131.08479:24 135.11067:24 143.08144:10 145.09589:12 147.11589:24 157.09811:24 159.11122:36 161.13181:36 171.11375:24 185.12247:12 194.09081:10 227.1738:12 241.19833:24 275.28949:10 327.07101:12 367.32626:24	1.11453	5.34887	1.24814	1.48144	11.1588	7.40994	9.7598	3.79058	5.36666	7.26924	3.73575	22.4394	2.90067	6.67219	18.8077	4.60054	12.4374	38.8835
1561	5.06	396.309	CAR 16:2	[M+H]+		0.929	TRUE	5.26	396.311	C23H41NO4	CAR	CMVGCHSJDXKPBB-UHFFFAOYSA-N	O=C([O-])CC(OC(=O)CCCCCCCC=CCC=CCCC)C[N+](C)(C)C	310	TRUE	TRUE	TRUE		FALSE	FALSE	null	null	100	99.5	81.9	81.9	100	47.7	190628_TT1_Hclass_Aging_028_9_18M_SPF_M_Kidney_4_Pos	396.31247:2031 397.31582:1364 398.31918:314	85.02279:7 85.02667:21 396.30188:10	0.770106	0.862136	0.700107	0.623953	0.232877	0.714824	0.706405	0.814261	0.537571	0.58108	0.622648	0.738036	0.84852	0.526864	0.186524	0.625448	0.816718	0.895703
1569	5.852	398.325	CAR 16:1	[M+H]+		0.375	TRUE	5.52	398.327	C23H43NO4	CAR	JFAGPSOZZSTLRF-UHFFFAOYSA-N	O=C([O-])CC(OC(=O)CCCCCCCC=CCCCCCC)C[N+](C)(C)C	310	TRUE	TRUE	TRUE		FALSE	FALSE	null	null	100	98.6	56.7	74	100	24.17	190628_TT1_Hclass_Aging_037_13_9w_GF_M_Kidney_1_Pos	398.32599:835 399.32934:682 400.3327:261	85.02634:60 302.07819:10 398.31683:12	0.201786	0.196287	0.181776	0.231235	0.10041	0.233229	0.19294	0.179837	0.150013	0.289433	0.209703	0.197179	0.24921	0.165554	0.0904539	0.209878	0.237683	0.321317
1570	5.5	398.326	CAR 16:1	[M+H]+	similar chromatogram in higher mz_1672; similar chromatogram in higher mz_1603	0.946	TRUE	5.52	398.327	C23H43NO4	CAR	JFAGPSOZZSTLRF-UHFFFAOYSA-N	O=C([O-])CC(OC(=O)CCCCCCCC=CCCCCCC)C[N+](C)(C)C	310	TRUE	TRUE	TRUE		FALSE	FALSE	null	null	100	100	62.4	80.5	100	434.71	190628_TT1_Hclass_Aging_047_1_9w_SPF_M_Kidney_1_Pos	398.32578:14240 399.32913:5494 400.33249:1298	79.05631:24 81.07139:12 85.02749:752 95.08495:12 121.09813:12 135.12128:36 144.1012:48 213.10889:12 237.21027:12 325.17355:10 339.25958:60 398.33832:238	4.23143	6.22772	3.13549	3.05588	1.8238	3.96349	6.90379	4.17788	4.69657	4.26512	5.13391	7.0857	3.69209	4.66935	2.26608	5.47476	6.41631	5.33846
1585	6.035	400.341	CAR 16:0	[M+H]+		0.946	TRUE	6.08	400.342	C23H45NO4	CAR	XOMRRQXKHMYMOC-UHFFFAOYSA-N	O=C([O-])CC(OC(=O)CCCCCCCCCCCCCCC)C[N+](C)(C)C	310	TRUE	TRUE	TRUE		FALSE	FALSE	null	null	100	100	72.7	82.7	100	1540.67	190628_TT1_Hclass_Aging_015_31_18M_SPF_F_Kidney_1_Pos	400.34134:78409 401.34469:45138 402.34805:7396	71.08339:113 81.07474:36 83.08454:60 84.08001:48 85.02835:5985 85.10211:36 85.42344:24 91.01337:10 95.08042:24 95.08316:60 103.08051:24 123.10717:12 129.07362:24 137.12471:12 144.10252:341 159.14355:12 215.18875:12 239.23943:97 257.25012:36 263.39209:10 341.27094:303 369.05276:10 400.34924:2307	40.7055	29.0987	31.7274	27.6843	23.1822	32.1244	28.866	30.4224	32.8332	37.4949	34.2274	33.2194	35.6466	27.9135	23.1778	27.5532	32.7864	32.8587
1722	5.342	422.324	CAR 18:3	[M+H]+		0.911	TRUE	5.58	422.327	C25H43NO4	CAR	WJCRATGUUISKDG-UHFFFAOYSA-N	O=C([O-])CC(OC(=O)CCCCCCCC=CCC=CCC=CCC)C[N+](C)(C)C	310	TRUE	TRUE	TRUE		FALSE	FALSE	null	null	100	99.3	65.4	87.9	100	26.02	190628_TT1_Hclass_Aging_029_42_12M_GF_F_Kidney_3_Pos	422.32578:1841 423.32913:523 424.33249:108	85.02434:24 95.08303:10 123.11795:10 377.09949:10 422.3287:36	0.464873	0.453988	0.351554	0.361653	0.2599	0.365261	0.396394	0.326093	0.414859	0.48451	0.446427	0.42759	0.356132	0.628937	0.191549	0.463405	0.49447	0.507774
1733	5.73	424.343	CAR 18:2	[M+H]+	similar chromatogram in higher mz_2066	0.946	TRUE	5.88	424.342	C25H45NO4	CAR	MJLXQSQYKZWZCB-UHFFFAOYSA-N	O=C([O-])CC(OC(=O)CCCCCCCC=CCC=CCCCCC)C[N+](C)(C)C	310	TRUE	TRUE	TRUE		FALSE	FALSE	null	null	100	99.8	82.7	88	100	525.63	190628_TT1_Hclass_Aging_029_42_12M_GF_F_Kidney_3_Pos	424.34256:33119 425.34591:17924 426.34927:3233	79.05423:24 81.0693:60 83.08414:78 85.02665:1725 91.05043:12 95.08683:60 97.06595:12 97.09775:48 103.03589:12 107.08578:12 129.08107:12 132.04556:24 135.11221:36 137.13895:12 144.09184:36 144.10362:68 145.48138:10 147.11407:36 165.16599:10 175.14021:24 239.12144:12 245.2179:12 267.15292:24 309.19785:12 424.3396:1122 424.35983:903	9.82173	10.9651	7.92495	8.94402	5.76999	9.02976	9.27505	8.265	7.68305	8.5748	7.79867	9.49727	7.12318	9.39994	5.68588	9.26901	8.6816	9.5377
1744	6.172	426.357	CAR 18:1	[M+H]+		0.946	TRUE	6.25	426.358	C25H47NO4	CAR	IPOLTUVFXFHAHI-UHFFFAOYSA-N	O=C([O-])CC(OC(=O)CCCCCCCC=CCCCCCCCC)C[N+](C)(C)C	310	TRUE	TRUE	TRUE		FALSE	FALSE	null	null	100	99.9	71.7	85.4	100	1873.22	190628_TT1_Hclass_Aging_009_20_18M_GF_M_Kidney_3_Pos	426.35638:83375 427.35973:47929 428.36309:7903	71.08371:81 81.065:48 83.08746:67 84.7611:48 85.02872:4554 93.06528:24 95.08356:36 97.10275:36 107.08234:12 121.09359:12 121.09977:60 129.07256:12 135.11165:48 139.10574:12 144.09972:218 149.13377:60 151.14882:24 157.04292:24 163.15189:24 165.16542:24 167.1405:36 177.16586:36 181.16068:36 184.60474:10 209.19469:36 227.12439:36 241.14526:36 247.23863:144 255.1488:12 265.24994:97 269.17447:119 283.…	23.0048	27.0462	17.9121	17.3461	11.3389	20.6091	33.2076	26.6683	23.466	21.9374	24.9585	36.958	21.3564	26.2453	17.8401	23.6122	24.5648	25.6429
1751	6.684	428.372	CAR 18:0	[M+H]+	similar chromatogram in higher mz_2080; similar chromatogram in higher mz_3434; similar chromatogram in higher mz_2259	0.946	TRUE	6.69	428.373	C25H49NO4	CAR	FNPHNLNTJNMAEE-UHFFFAOYSA-N	O=C([O-])CC(OC(=O)CCCCCCCCCCCCCCCCC)C[N+](C)(C)C	310	TRUE	TRUE	TRUE		FALSE	FALSE	null	null	100	100	74.9	87.7	100	887.25	190628_TT1_Hclass_Aging_043_37_9w_GF_F_Kidney_1_Pos	428.37311:58043 429.37646:38309 430.37982:7116	71.08251:60 81.06618:12 81.07124:36 83.08482:36 84.08028:24 85.02732:4574 85.09721:24 88.39957:24 92.15367:10 95.0834:60 103.03656:12 123.11198:24 144.0891:12 144.10089:231 145.08287:24 151.14481:12 249.24248:12 267.26788:60 285.27521:48 327.06311:12 327.33722:24 369.30771:815 426.99686:24 428.37234:1158 428.39267:3080	18.2137	8.85703	17.5087	13.4758	8.91979	17.1157	12.694	18.4166	13.3602	12.4218	13.0501	15.4511	17.3858	7.9505	13.0523	10.1112	11.1275	9.61714
1820	6.576	438.298	LPE O-16:1	[M+H]+	adduct linked to 2037_[M+Na]+	0.946	TRUE	6.43	438.298	C21H44NO6P	EtherLPE	RRTPYUGIBQLEDN-UHFFFAOYSA-N	O=P(O)(OCCN)OCC(O)COCCCCCCCCC=CCCCCCC	310	TRUE	TRUE	TRUE		FALSE	FALSE	null	null	100	99.7	86.7	93.1	100	181.28	190628_TT1_Hclass_Aging_033_12_24M_SPF_M_Kidney_5_Pos	438.29611:10045 439.29946:4833 440.30282:2868	82.06377:12 84.07928:36 149.0258:12 266.28104:430 284.27457:12 284.29349:183 364.25424:24 438.30194:60	8.60519	14.3134	7.64359	10.5418	10.5943	10.4674	11.4503	8.39624	9.50393	9.65055	9.42828	10.5285	7.40979	9.32705	8.26598	11.6778	12.6606	8.96092
1878	5.322	446.324	CAR 20:5	[M+H]+		0.911	TRUE	5.38	446.327	C27H43NO4	CAR	USUPQTJPNBGUSJ-UHFFFAOYSA-N	O=C([O-])CC(OC(=O)CCCC=CCC=CCC=CCC=CCC=CCC)C[N+](C)(C)C	310	TRUE	TRUE	TRUE		FALSE	FALSE	null	null	100	100	65.6	86	100	27.19	190628_TT1_Hclass_Aging_009_20_18M_GF_M_Kidney_3_Pos	446.32611:1734 447.32946:1506 448.33282:385	73.04538:10 85.02727:63 98.97818:12 119.07753:12 147.06731:12 157.10594:10 446.31158:12 446.32343:24	0.259895	0.385816	0.181776	0.251164	0.194726	0.246124	0.205727	0.309441	0.488036	0.512457	0.584173	0.252289	0.318298	0.498899	0.148983	0.377601	0.398385	0.519513
1891	5.718	448.343	CAR 20:4	[M+H]+		0.946	TRUE	5.68	448.342	C27H45NO4	CAR	VPEBWBVNBKLXSR-UHFFFAOYSA-N	O=C([O-])CC(OC(=O)CCCCCCC=CCC=CCC=CCC=CCC)C[N+](C)(C)C	310	TRUE	TRUE	TRUE		FALSE	FALSE	null	null	100	100	68.6	88	100	468.81	190628_TT1_Hclass_Aging_048_40_12M_GF_F_Kidney_1_Pos	448.34116:19032 449.34451:13531 450.34787:3066	71.08041:10 77.03838:24 81.07027:73 85.02763:402 91.04875:12 91.05143:24 95.08237:60 98.97992:36 98.98411:36 105.06219:12 119.09163:12 121.10603:24 129.06622:12 131.08099:24 135.11658:24 143.08917:24 144.10139:117 147.1152:48 149.09262:24 157.04111:12 161.13815:12 185.12538:24 448.34668:535	5.31156	6.68846	5.42238	5.98954	2.7116	8.40913	6.85889	8.05269	7.49025	8.73307	9.65956	7.61604	6.59324	5.32289	4.96964	6.74659	8.55854	10.1006
1981	6.302	454.293	LPE 16:0	[M+H]+	similar chromatogram in higher mz_6970	0.946	TRUE	6.33	454.293	C21H44NO7P	LPE	YVYMBNSKXOXSKW-UHFFFAOYSA-N	O=C(OCC(O)COP(=O)(O)OCCN)CCCCCCCCCCCCCCC	310	TRUE	TRUE	TRUE		FALSE	FALSE	null	null	100	100	54.4	74.7	100	356.28	190628_TT1_Hclass_Aging_038_47_24M_GF_F_Kidney_3_Pos	454.29071:24741 455.29406:12506 456.29742:2423	77.03589:10 81.07529:12 85.02632:36 86.03071:12 93.05327:36 97.10154:24 133.04506:36 154.99934:12 155.00633:48 164.14275:10 199.15044:10 282.27695:97 312.26901:12 313.27652:527 345.13696:10 454.32126:12	24.7995	25.3203	26.1695	18.6481	19.1424	23.3537	23.851	24.5146	18.4341	17.9614	19.0496	26.0186	25.7021	19.5241	20.9383	23.2434	22.9112	14.1487
1982	5.833	454.327	LPC O-14:0	[M+H]+		0.768	TRUE	6.18	454.329	C22H48NO6P	EtherLPC	NJGCXCOQLSTJQC-UHFFFAOYSA-N	O=P([O-])(OCC[N+](C)(C)C)OCC(OCCCCCCCCCCCCCC)CO	310	TRUE	TRUE	TRUE		FALSE	FALSE	null	null	100	98.6	93.1	98.1	100	67.73	190628_TT1_Hclass_Aging_027_15_9w_GF_M_Kidney_3_Pos	454.3291:1649 455.33245:1032 456.33581:275	75.0456:12 86.10281:12 104.10854:120 124.99167:12 124.99638:36 166.05841:10 184.07611:36 454.32971:48	0.222539	0.809245	0.22887	0.493536	0.186513	0.228183	0.267957	0.263927	0.930477	0.626182	0.728674	0.216565	0.265385	0.503373	0.181499	0.590767	0.543917	0.424237
1984	6.754	454.39	CAR 20:1	[M+H]+		0.946	TRUE	6.74	454.389	C27H51NO4	CAR	PVOQPLSKYNZHOT-UHFFFAOYSA-N	O=C([O-])CC(OC(=O)CCCCCCCCCC=CCCCCCCCC)C[N+](C)(C)C	310	TRUE	TRUE	TRUE		FALSE	FALSE	null	null	100	100	80.5	87.9	100	507.74	190628_TT1_Hclass_Aging_015_31_18M_SPF_F_Kidney_1_Pos	454.38898:11103 455.39233:7894 456.39569:1446	79.05483:10 85.02729:554 93.05431:12 95.08479:24 121.10579:12 125.10052:24 132.04808:24 144.0945:12 144.10629:48 227.12633:12 283.18781:12 325.23279:24 395.31265:12 454.35187:12 454.39075:811	6.3968	4.1714	5.80513	4.62822	1.98435	5.1414	6.51933	7.78627	6.7264	5.02219	7.25503	6.83812	7.22106	5.69231	3.28206	4.64841	4.07067	5.12415
1990	7.252	456.403	CAR 20:0	[M+H]+		0.946	TRUE	7.18	456.405	C27H53NO4	CAR	SVJLJQBGUITFLI-UHFFFAOYSA-N	O=C([O-])CC(OC(=O)CCCCCCCCCCCCCCCCCCC)C[N+](C)(C)C	310	TRUE	TRUE	TRUE		FALSE	FALSE	null	null	100	99.9	83	87.7	100	389.39	190628_TT1_Hclass_Aging_QC_Pos_05	456.40289:19245 457.40624:11810 458.4096:2503	85.02659:1483 91.04904:10 144.09349:12 144.09854:60 295.31808:24 310.40558:10 397.32455:60 456.37958:59 456.40958:1272	2.98113	1.29879	2.93691	2.30766	1.3509	2.55879	1.87825	3.2662	3.00139	2.22166	3.19107	2.25593	3.62931	1.54787	2.40146	1.63448	1.79414	1.75619
2080	6.674	464.314	LPE O-18:2	[M+H]+	adduct linked to 2246_[M+Na]+; similar chromatogram in higher mz_3434	0.946	TRUE	6.6	464.314	C23H46NO6P	EtherLPE	DBVHWKABURKXNY-UHFFFAOYSA-N	O=P(O)(OCCN)OCC(O)COCCCCCCCCC=CCC=CCCCCC	310	TRUE	TRUE	TRUE		FALSE	FALSE	null	null	100	99.9	70.2	90.2	100	88.2	190628_TT1_Hclass_Aging_039_41_12M_GF_F_Kidney_2_Pos	464.31369:9229 465.31704:4874 466.3204:1714	79.05146:12 84.08188:36 95.08377:24 97.10019:24 147.05746:12 147.06596:36 155.00287:12 171.14246:12 207.03275:24 225.03558:24 292.29639:451 310.29099:12 310.31323:129 326.98093:24 343.00012:24 351.44266:10 372.25183:10 464.32318:24	4.38119	13.3983	4.72787	7.50115	5.0863	5.74188	8.76046	7.15707	9.30071	9.89961	9.23525	8.59739	4.73679	8.74779	5.8801	11.7807	12.8533	8.26177
2096	7.169	466.329	LPE O-18:1	[M+H]+	adduct linked to 2252_[M+Na]+	0.946	TRUE	6.95	466.329	C23H48NO6P	EtherLPE	CDONWGCJDDHTLP-UHFFFAOYSA-N	O=P(O)(OCCN)OCC(O)COCCCCCCCCC=CCCCCCCCC	310	TRUE	TRUE	TRUE		FALSE	FALSE	null	null	100	99.4	79.4	93.7	100	250.94	190628_TT1_Hclass_Aging_018_24_24M_GF_M_Kidney_3_Pos	466.32861:9422 467.33196:5387 468.33532:2457	84.07798:36 95.08234:12 147.06927:10 155.00627:24 294.31476:493 312.31094:24 312.32831:122 392.29346:24 448.30844:48 466.31448:12 466.33267:60	8.94768	9.93654	8.44814	8.89515	10.6734	10.2024	9.83526	9.19434	8.19752	7.4537	8.13799	10.5773	9.297	7.51979	9.15741	9.49821	8.91821	6.66744
2105	6.621	468.305	LPE 17:0	[M+H]+		0.714	TRUE	6.5	468.308	C22H46NO7P	LPE	RVNBVQKDPQVSOY-UHFFFAOYSA-N	O=C(OCC(O)COP(=O)(O)OCCN)CCCCCCCCCCCCCCCC	310	TRUE	TRUE	TRUE		FALSE	FALSE	null	null	100	99.8	55.7	73.9	100	23.1	190628_TT1_Hclass_Aging_001_38_9w_GF_F_Kidney_2_Pos	468.30991:535 469.31326:355 470.31662:80	135.1138:10 272.29141:10 327.29092:36	0.469821	0.510206	0.558639	0.566909	0.419377	0.486368	0.480508	0.520968	0.421718	0.992488	0.357156	0.535955	0.492956	1.78234	0.420291	0.544262	0.483536	0.343916
2106	5.525	468.308	LPC 14:0/0:0	[M+H]+		0.929	TRUE	5.72	468.308	C22H46NO7P	LPC	VXUOFDJKYGDUJI-UHFFFAOYSA-N	O=C(OCC(O)COP(=O)([O-])OCC[N+](C)(C)C)CCCCCCCCCCCCC	310	TRUE	TRUE	TRUE		FALSE	FALSE	null	null	100	99.5	74.9	93.7	100	51.75	190628_TT1_Hclass_Aging_QC_Pos_05	468.30847:4188 469.31182:2580 470.31518:584	86.08833:12 86.09614:67 98.9831:24 104.10549:170 109.11071:10 124.99614:24 153.09641:10 163.01991:36 184.07578:467 285.24677:24 450.26147:12 450.28232:48 468.29419:36 468.32758:109	0.53288	0.333218	0.52853	0.346706	0.447208	0.562888	0.493006	0.467354	0.476215	0.499452	0.594746	0.484639	0.433993	0.448282	0.511981	0.381786	0.507955	0.506955
2110	6.19	468.341	LPC O-15:0	[M+H]+		0.375	TRUE	6.39	468.345	C23H50NO6P	EtherLPC	VTFABDYKCIOCAV-UHFFFAOYSA-N	O=P([O-])(OCC[N+](C)(C)C)OCC(OCCCCCCCCCCCCCCC)CO	310	TRUE	TRUE	TRUE		FALSE	FALSE	null	null	100	99.5	97.6	99.7	100	44.02	190628_TT1_Hclass_Aging_028_9_18M_SPF_M_Kidney_4_Pos	468.34503:1920 469.34838:1146 470.35174:294	86.09876:24 104.10694:118 109.06238:10 125.00245:36 184.05487:12 184.07201:36 468.32468:12 468.34595:36	0.0619405	0.32646	0.0734903	0.167052	0.0574906	0.0723233	0.077858	0.0702141	0.298901	0.478145	0.224095	0.0648032	0.0608632	0.670326	0.0520258	0.344116	0.198069	0.139228
2142	6.23	476.372	CAR 22:4	[M+H]+	adduct linked to 2774_[M+IsoProp+H]+	0.946	TRUE	6.21	476.373	C29H49NO4	CAR	DZMCTWIUTJHPSM-UHFFFAOYSA-N	O=C([O-])CC(OC(=O)CCCCCCCCC=CCC=CCC=CCC=CCC)C[N+](C)(C)C	310	TRUE	TRUE	TRUE		FALSE	FALSE	null	null	100	100	69	87.9	100	83.57	190628_TT1_Hclass_Aging_004_14_9w_GF_M_Kidney_2_Pos	476.37195:3837 477.3753:2177 478.37866:513	79.05102:12 79.05476:12 81.07362:24 85.0272:140 91.051:12 91.05368:24 107.08931:10 131.08379:10 135.1129:24 143.0854:10 165.15953:10 264.07352:10 415.13031:10 476.34564:24 476.36096:124	0.90612	0.630882	1.11615	1.12452	0.342294	1.65026	1.00931	1.31464	1.3701	1.23493	1.59656	1.16646	1.00397	0.680113	1.11826	0.623654	1.26539	1.27599
2189	5.986	478.29	LPE 18:2	[M+H]+		0.946	TRUE	6.13	478.293	C23H44NO7P	LPE	DBHKHNGBVGWQJE-UHFFFAOYSA-N	O=C(OCC(O)COP(=O)(O)OCCN)CCCCCCCC=CCC=CCCCCC	310	TRUE	TRUE	TRUE		FALSE	FALSE	null	null	100	99.8	63.2	74.9	100	18.84	190628_TT1_Hclass_Aging_QC_Pos_05	478.29034:8780 479.29369:4891 480.29705:727	81.06803:24 95.08273:24 107.09161:12 132.04561:48 201.04076:10 207.02742:24 225.03638:12 226.04576:24 299.07736:12 306.28119:36 337.26932:733 443.16165:12 478.29758:12	4.93795	4.15033	4.13153	4.28756	3.94184	4.73683	3.7622	4.18023	3.81838	3.9588	3.65127	3.7959	4.20999	4.82514	3.03261	3.87701	3.89239	3.32594
2206	6.421	480.305	LPE 18:1	[M+H]+	adduct linked to 2358_[M+Na]+; adduct linked to 2623_[M+IsoProp+H]+; found in higher mz's MsMs_6888; similar chromatogram in higher mz_4155	0.946	TRUE	6.41	480.308	C23H46NO7P	LPE	PYVRVRFVLRNJLY-UHFFFAOYSA-N	O=C(OCC(O)COP(=O)(O)OCCN)CCCCCCCC=CCCCCCCCC	310	TRUE	TRUE	TRUE		FALSE	FALSE	null	null	100	100	67.9	74.7	100	196.68	190628_TT1_Hclass_Aging_018_24_24M_GF_M_Kidney_3_Pos	480.30734:19158 481.31069:9947 482.31405:1882	71.08288:12 93.0724:24 95.08528:36 104.111:12 107.08849:24 109.10756:12 135.11687:24 151.14223:12 165.15669:24 173.02573:10 198.04933:12 207.02901:24 207.03911:12 261.26593:10 297.09021:12 308.29013:105 326.96872:12 339.28934:1563 419.25562:10 480.32712:36	15.3188	20.2477	14.4321	15.8286	10.658	14.0223	17.8295	18.5768	16.9932	16.0508	17.2951	19.3859	16.6531	16.6671	13.4986	18.6359	19.6127	13.5571
2211	6.906	480.404	CAR 22:2	[M+H]+	similar chromatogram in higher mz_6528; similar chromatogram in higher mz_2224	0.857	TRUE	7.06	480.405	C29H53NO4	CAR	LDIMXAXYWUCEAM-UHFFFAOYSA-N	O=C([O-])CC(OC(=O)CCCCCCCCCCCC=CCC=CCCCCC)C[N+](C)(C)C	310	TRUE	TRUE	TRUE		FALSE	FALSE	null	null	100	99.7	73.3	87.9	100	78.38	190628_TT1_Hclass_Aging_025_36_24M_SPF_F_Kidney_5_Pos	480.40356:4222 481.40691:2978 482.41027:175	83.08603:10 85.02597:88 144.09921:24 199.15562:10 403.31863:10 480.40469:92	1.23753	0.460746	1.33782	1.10547	0.457011	0.947211	0.542449	1.18365	1.26709	0.94882	1.14514	0.604553	1.4917	0.833922	0.60273	0.595551	0.558807	0.851751
2223	5.896	482.319	LPC 15:0/0:0	[M+H]+		0.071	TRUE	5.98	482.324	C23H48NO7P	LPC	RJZVWDTYEWCUAR-UHFFFAOYSA-N	O=C(OCC(O)COP(=O)([O-])OCC[N+](C)(C)C)CCCCCCCCCCCCCC	310	TRUE	TRUE	TRUE		FALSE	FALSE	null	null	100	99.9	55.6	87.5	100	71.68	190628_TT1_Hclass_Aging_010_8_18M_SPF_M_Kidney_3_Pos	482.32074:5622 483.32409:3438 484.32745:1248	75.04598:24 86.0967:99 93.05017:12 104.10039:48 104.10469:332 109.09817:12 123.12453:12 124.99685:36 132.0399:24 166.06076:48 184.07288:510 296.4733:10 299.25339:36 464.28729:12 464.30844:36 482.31552:60	0.507018	0.602967	0.511732	0.529877	0.505229	0.540743	0.54046	0.542008	0.507456	1.55563	0.49665	0.588767	0.46086	2.79568	0.49661	0.705572	0.545603	0.592404
2224	6.92	482.325	LPE 18:0	[M+H]+	found in higher mz's MsMs_6873	0.946	TRUE	6.82	482.324	C23H48NO7P	LPE	BBYWOYAFBUOUFP-UHFFFAOYSA-N	O=C(OCC(O)COP(=O)(O)OCCN)CCCCCCCCCCCCCCCCC	310	TRUE	TRUE	TRUE		FALSE	FALSE	null	null	100	99.9	56.9	74.9	100	924.15	190628_TT1_Hclass_Aging_047_1_9w_SPF_M_Kidney_1_Pos	482.32281:56518 483.32616:31466 484.32952:6278	71.08381:60 78.00929:10 81.06631:36 83.08879:48 85.09864:116 95.07808:24 95.08492:60 97.10135:36 98.98253:36 106.07118:10 109.09688:36 113.13316:24 123.11064:24 135.11308:24 139.10716:12 153.12848:10 155.01297:74 173.00842:12 198.0426:12 198.05051:24 216.06248:12 267.25693:24 285.28522:12 310.30496:189 341.29913:1382 417.1763:12 421.2789:48 464.28857:12 482.30753:24	46.9523	45.9498	47.9599	43.1399	38.8915	46.0151	45.9249	48.8204	37.8308	38.5331	38.4165	52.8255	51.1276	39.5082	45.2158	42.2951	48.003	32.1201
2227	6.521	482.359	LPC O-16:0	[M+H]+		0.946	TRUE	6.46	482.361	C24H52NO6P	EtherLPC	RKKJZVVEVRCBJA-UHFFFAOYSA-N	O=P([O-])(OCC[N+](C)(C)C)OCC(OCCCCCCCCCCCCCCCC)CO	310	TRUE	TRUE	TRUE		FALSE	FALSE	null	null	100	100	91.2	99.9	100	971.29	190628_TT1_Hclass_Aging_041_46_24M_GF_F_Kidney_2_Pos	482.36081:19507 483.36416:12590 484.36752:2501	71.07097:60 75.04158:24 86.09327:287 93.05064:12 98.9786:24 104.10516:1007 107.33392:10 124.99262:73 125.00046:167 166.05215:12 166.05939:109 169.41042:10 181.0267:24 184.0714:447 325.12137:12 343.12244:24 482.36157:499	7.70521	37.713	7.51761	24.4772	7.47934	7.55554	8.94174	7.97526	32.3488	25.3694	26.6626	7.80989	7.99309	19.2208	6.40804	31.1911	20.3901	15.213
2228	7.283	482.418	CAR 22:1	[M+H]+	similar chromatogram in higher mz_4805	0.946	TRUE	7.39	482.42	C29H55NO4	CAR	WDWXOVLPQSTGNY-UHFFFAOYSA-N	O=C([O-])CC(OC(=O)CCCCCCCCCCCC=CCCCCCCCC)C[N+](C)(C)C	310	TRUE	TRUE	TRUE		FALSE	FALSE	null	null	100	99.9	85.5	87.4	100	318.47	190628_TT1_Hclass_Aging_022_44_18M_GF_F_Kidney_2_Pos	482.41806:6151 483.42141:4494 484.42477:902	85.02162:12 85.02809:116 132.041:24 482.41623:283	0.959759	0.59709	1.26973	1.04686	0.515561	0.872645	0.839389	1.50724	1.95355	1.1118	1.71551	0.995864	1.65235	1.32387	0.904539	0.873295	0.638878	1.18699
2239	7.753	484.435	CAR 22:0	[M+H]+	similar chromatogram in higher mz_3035; similar chromatogram in higher mz_3477	0.946	TRUE	7.82	484.436	C29H57NO4	CAR	IUMXSSOVGPXXJL-UHFFFAOYSA-N	O=C([O-])CC(OC(=O)CCCCCCCCCCCCCCCCCCCCC)C[N+](C)(C)C	310	TRUE	TRUE	TRUE		FALSE	FALSE	null	null	100	99.9	87.3	87.3	100	54.27	190628_TT1_Hclass_Aging_019_17_12M_GF_M_Kidney_2_Pos	484.436:1153 485.43935:938 486.44271:293	85.02551:48 484.42194:36	0.427517	0.233605	0.384849	0.389788	0.277121	0.351805	0.249202	0.461248	0.511678	0.36857	0.509867	0.329278	0.472923	0.244416	0.44015	0.267878	0.247235	0.297294
2250	6.404	487.351	LPE 18:1(d7)	[M+H]+	adduct linked to 2117_[M+H-H2O]+; adduct linked to 2403_[M+Na]+; adduct linked to 6931_[2M+H]+; adduct linked to 7017_[2M+Na]+; found in higher mz's MsMs_6931; found in higher mz's MsMs_6888; found in higher mz's MsMs_6581; found in higher mz's MsMs_7017	0.982	TRUE	6.4	487.352	C23H39NO7P	LPE	PYVRVRFVLRNJLY-CCLUNVSZNA-N	[C@](COP(=O)(O)OCCN)([H])(O)COC(CCCCCCC/C=C\CCCCCC([2H])([2H])C([2H])([2H])C([2H])([2H])[2H])=O	annotated by user-defined text library	TRUE	TRUE	FALSE		TRUE	FALSE	null	null	100	100	null	null	null	8567.14	190628_TT1_Hclass_Aging_032_23_24M_GF_M_Kidney_2_Pos	487.35245:252320 488.3558:116665 489.35916:21180	70.07595:60 71.08147:60 72.09059:153 73.09601:124 74.10116:60 75.11073:36 79.05383:189 81.07015:191 82.07512:60 83.08372:430 84.09462:60 85.0974:48 86.10351:36 87.1103:36 89.11892:36 93.07076:220 95.08499:374 96.09056:103 97.09866:164 98.05921:36 98.984:308 99.10828:48 100.12081:36 101.12438:36 103.1394:36 107.08817:64 109.09844:86 110.10469:36 111.08007:36 111.11261:48 114.13242:24 115.1405:24 1…	205.492	205.492	205.492	205.492	205.492	205.492	205.492	205.492	205.492	205.492	205.492	205.492	205.492	205.492	205.492	205.492	205.492	205.492
2254	8.009	488.391	TG 24:0|TG 8:0_8:0_8:0	[M+NH4]+	similar chromatogram in higher mz_5634	1	TRUE	7.49	488.395	C27H50O6	TG	VLPFTAMPNXLGLX-UHFFFAOYSA-N	O=C(OCC(OC(=O)CCCCCCC)COC(=O)CCCCCCC)CCCCCCC	410	TRUE	TRUE	TRUE		FALSE	FALSE	null	null	100	96.6	84.2	72	100	38.42	190628_TT1_Hclass_Aging_040_25_9w_SPF_F_Kidney_1_Pos	488.39337:1499 489.39672:881 490.40008:275	241.15318:10 327.23636:24 327.25159:141	0.310306	2.04848	0.30717	0.931499	2.80769	2.04925	1.41237	0.696894	2.35195	1.34287	1.28175	3.48203	0.565066	1.25635	3.62249	1.76175	5.97135	13.8174
2255	7.762	488.393	TG 24:0|TG 8:0_8:0_8:0	[M+NH4]+		0.286	TRUE	7.49	488.395	C27H50O6	TG	VLPFTAMPNXLGLX-UHFFFAOYSA-N	O=C(OCC(OC(=O)CCCCCCC)COC(=O)CCCCCCC)CCCCCCC	310	TRUE	TRUE	TRUE		FALSE	FALSE	null	null	97.9	99.2	54.1	72	100	22.92	190628_TT1_Hclass_Aging_032_23_24M_GF_M_Kidney_2_Pos	488.39124:1241 489.39459:926 490.39795:300	99.08348:12 190.05534:10 281.02948:12 281.03421:12 327.24304:48	0.145947	0.925213	0.111166	0.395079	1.14987	0.895619	0.685439	0.29655	1.01251	0.520761	0.548127	1.4569	0.256287	0.427509	1.47783	0.824733	2.27709	5.19346
2317	5.695	494.324	LPC 16:1/0:0	[M+H]+		0.946	TRUE	5.86	494.324	C24H48NO7P	LPC	LFUDDCMNKWEORN-UHFFFAOYSA-N	O=C(OCC(O)COP(=O)([O-])OCC[N+](C)(C)C)CCCCCCCC=CCCCCCC	310	TRUE	TRUE	TRUE		FALSE	FALSE	null	null	100	99.7	42.8	88.3	100	204.72	190628_TT1_Hclass_Aging_QC_Pos_04	494.32373:13212 495.32708:9192 496.33044:2707	71.0747:36 75.03813:12 75.03934:60 81.06672:133 86.08957:12 86.09869:201 93.04004:12 93.05087:173 97.10185:24 98.98722:36 99.07798:36 104.10684:693 106.0616:24 117.05352:12 117.08995:67 124.99134:36 124.99918:129 132.04388:472 135.10236:125 141.0676:10 150.05243:223 166.05072:12 166.05975:79 184.07179:1403 185.07069:24 220.13342:10 225.0993:36 240.09444:12 258.10059:24 269.09433:73 281.24606:12 3…	1.36237	1.21181	1.00307	1.08291	0.835336	1.55467	1.5117	1.58662	1.5978	1.4657	2.08352	1.5478	1.00973	1.69133	1.04406	1.29664	1.73036	1.73299
2332	6.235	496.339	LPC 16:0/0:0	[M+H]+	adduct linked to 2453_[M+Na]+; adduct linked to 2190_[M+H-H2O]+; found in higher mz's MsMs_7144; found in higher mz's MsMs_7002; found in higher mz's MsMs_2774; found in higher mz's MsMs_7065; found in higher mz's MsMs_7048	0.964	TRUE	6.21	496.34	C24H50NO7P	LPC	ASWBNKHCZGQVJV-UHFFFAOYSA-N	O=C(OCC(O)COP(=O)([O-])OCC[N+](C)(C)C)CCCCCCCCCCCCCCC	310	TRUE	TRUE	TRUE		FALSE	FALSE	null	null	100	100	73.1	88.6	100	5589.47	190628_TT1_Hclass_Aging_004_14_9w_GF_M_Kidney_2_Pos	496.33929:757852 497.34264:395256 498.346:68020	70.06155:36 71.07171:822 71.0859:212 72.07956:24 80.97133:88 81.06984:148 83.08341:180 85.09968:322 85.82609:60 86.09539:9197 86.64178:24 89.06165:24 95.08331:299 97.09835:60 98.9767:24 98.98229:515 103.77419:93 104.10608:30404 104.6006:36 104.87344:36 105.74749:24 109.10106:88 121.11024:10 123.11667:36 124.60646:36 124.99835:4653 127.38635:24 131.10789:12 136.99838:36 147.06377:12 155.00935:36 1…	261.068	239.029	267.813	222.106	194.037	254.042	245.783	250.945	274.056	276.744	346.175	237.97	255.444	266.137	242.607	246.817	287.643	300.77
2359	5.946	502.294	LPE 20:4	[M+H]+	adduct linked to 2496_[M+Na]+; adduct linked to 7030_[2M+H]+; found in higher mz's MsMs_7030	0.946	TRUE	5.83	502.293	C25H44NO7P	LPE	JPNPIRVRGLGTRE-UHFFFAOYSA-N	O=C(OCC(O)COP(=O)(O)OCCN)CCCCCCC=CCC=CCC=CCC=CCC	310	TRUE	TRUE	TRUE		FALSE	FALSE	null	null	100	99.8	50.5	75	100	663.77	190628_TT1_Hclass_Aging_019_17_12M_GF_M_Kidney_2_Pos	502.29196:58423 503.29531:34032 504.29867:6636	77.79795:10 79.05299:82 81.06931:48 91.05313:167 93.06719:80 95.08549:60 98.98172:36 101.05578:10 105.06551:60 107.08438:48 107.94425:10 109.10048:48 117.0673:65 119.0845:48 121.09576:48 124.0145:36 129.04927:60 129.07797:12 131.08159:100 133.09579:80 135.1172:36 142.02264:36 143.07977:24 145.10097:60 147.1125:36 149.09505:24 153.0687:24 155.01048:48 157.10165:48 159.11301:48 161.13004:36 169.106…	23.4638	41.382	23.1433	25.1867	20.6547	24.9607	32.4838	32.0046	27.0266	29.0892	28.8288	35.3799	24.1534	32.6024	21.5238	33.3649	38.6479	24.7952
2375	6.52	504.341	LPC O-18:3	[M+H]+		0.929	TRUE	6.1	504.345	C26H50NO6P	EtherLPC	KYSFZEJRFGLPCX-UHFFFAOYSA-N	O=P([O-])(OCC[N+](C)(C)C)OCC(OCCCCCCCCC=CCC=CCC=CCC)CO	310	TRUE	TRUE	TRUE		FALSE	FALSE	null	null	100	97.9	23	99	100	60.79	190628_TT1_Hclass_Aging_QC_Pos_05	504.34201:3859 505.34536:1655 506.34872:561	86.09095:12 86.09485:36 104.10407:89 125.00244:24 146.98315:24 162.13255:10 166.0527:24 176.99104:10 184.07008:75 445.24078:12 445.26447:206 445.27335:193 482.37241:12 504.33417:60	0.425602	1.49596	0.336256	1.05243	0.36084	0.402824	0.451235	0.395752	1.50098	1.0797	1.17804	0.429529	0.344069	1.10239	0.30979	1.09842	0.958597	0.809709
2386	6.857	506.36	LPC O-18:2	[M+H]+	found in higher mz's MsMs_3017	0.946	TRUE	6.28	506.361	C26H52NO6P	EtherLPC	QQNAQRKNFKTYBP-UHFFFAOYSA-N	O=P([O-])(OCC[N+](C)(C)C)OCC(OCCCCCCCCC=CCC=CCCCCC)CO	410	TRUE	TRUE	TRUE		FALSE	FALSE	null	null	100	96.1	77.7	92.4	100	17.16	190628_TT1_Hclass_Aging_009_20_18M_GF_M_Kidney_3_Pos	506.35965:1767 507.363:927 508.36636:312	86.08788:12 86.0996:48 98.98404:10 104.10789:48 124.9941:12 163.0069:12 163.01227:24 179.10811:10 184.07147:102 357.73465:10 439.33554:10 506.33047:12 506.35257:101	0.460403	0.380821	0.53093	0.389495	0.331962	0.445713	0.388722	0.469574	0.497324	0.500282	0.5363	0.446976	0.52282	0.375013	0.519666	0.375508	0.481265	0.523881
2397	6.029	508.338	LPC 17:1/0:0	[M+H]+		0.054	TRUE	6.03	508.34	C25H50NO7P	LPC	LPMGFNAQZPADDZ-UHFFFAOYSA-N	O=C(OCC(O)COP(=O)([O-])OCC[N+](C)(C)C)CCCCCCCC=CCCCCCCC	310	TRUE	TRUE	TRUE		FALSE	FALSE	null	null	100	100	32.2	93.1	100	43.19	190628_TT1_Hclass_Aging_020_7_18M_SPF_M_Kidney_1_Pos	508.33862:1376 509.34197:794 510.34533:297	83.08284:10 104.09973:24 104.10546:60 132.03912:12 178.96024:10 184.07002:92 201.13026:10 207.02942:24 211.80931:10 225.03214:24 226.04152:24 251.08208:10 266.01901:24 269.99301:10 281.04633:24 283.02103:12 287.11008:10 325.08438:12 490.31253:12 496.27429:10 508.32492:24	0.136333	0.142808	0.116985	0.118988	0.101205	0.11269	0.140372	0.159022	0.156487	0.522418	0.187676	0.166716	0.104454	1.00842	0.118536	0.187754	0.164636	0.155335
2398	6.617	508.377	LPC O-18:1	[M+H]+	adduct linked to 1109_[M-C6H10O5+H]+; found in higher mz's MsMs_2602	0.946	TRUE	6.72	508.376	C26H54NO6P	EtherLPC	LGYDTKYITBAFRQ-UHFFFAOYSA-N	O=P([O-])(OCC[N+](C)(C)C)OCC(OCCCCCCCCC=CCCCCCCCC)CO	310	TRUE	TRUE	TRUE		FALSE	FALSE	null	null	100	99.9	93.5	99.3	100	146.21	190628_TT1_Hclass_Aging_018_24_24M_GF_M_Kidney_3_Pos	508.3764:9751 509.37975:6311 510.38311:1479	81.07425:10 86.09733:84 93.05622:12 104.10392:549 106.06299:24 124.9897:12 124.99911:87 150.05235:12 166.06329:48 184.07361:260 508.37167:213	1.74391	5.19045	1.5505	3.1564	2.06701	1.90676	2.52385	2.3956	4.29128	4.07558	4.31213	2.51735	1.90019	3.0236	1.97373	4.90014	3.61553	2.66199
2408	6.553	510.355	LPC 17:0/0:0	[M+H]+	adduct linked to 2535_[M+Na]+	0.946	TRUE	6.4	510.355	C25H52NO7P	LPC	SRRQPVVYXBTRQK-UHFFFAOYSA-N	O=C(OCC(O)COP(=O)([O-])OCC[N+](C)(C)C)CCCCCCCCCCCCCCCC	310	TRUE	TRUE	TRUE		FALSE	FALSE	null	null	100	99.7	81.8	93	100	278.9	190628_TT1_Hclass_Aging_034_32_18M_SPF_F_Kidney_2_Pos	510.35672:5947 511.36007:3802 512.36343:694	80.05006:10 104.09925:12 104.10784:79 166.05905:12 184.071:223 492.33148:12 492.35016:24 510.34885:36 510.36786:24	2.17239	2.23615	2.2686	2.31088	2.10861	2.07831	1.71003	2.00957	1.90486	6.65807	1.90789	2.13684	2.39752	13.2667	1.93087	2.42735	1.94922	2.3849
2410	7.118	510.393	LPC O-18:0	[M+H]+		0.893	TRUE	7.19	510.392	C26H56NO6P	EtherLPC	GGVRMOJUHVWYBR-UHFFFAOYSA-N	O=P([O-])(OCC[N+](C)(C)C)OCC(OCCCCCCCCCCCCCCCCCC)CO	310	TRUE	TRUE	TRUE		FALSE	FALSE	null	null	100	99.9	95.2	97.9	100	112.32	190628_TT1_Hclass_Aging_020_7_18M_SPF_M_Kidney_1_Pos	510.39105:4262 511.3944:2546 512.39776:669	80.04657:10 86.09343:36 104.09534:12 104.10822:281 107.25272:10 124.99599:36 167.14095:10 184.07365:166 510.39236:104	0.833004	1.52064	0.818592	1.41935	0.91932	0.82499	0.82376	0.919998	1.43934	1.30743	1.34721	0.790654	1.01603	1.03303	0.920797	1.40427	0.976297	0.855573
2446	8.459	516.422	TG 26:0|TG 8:0_8:0_10:0	[M+NH4]+	similar chromatogram in higher mz_3028	1	TRUE	8.26	516.426	C29H54O6	TG	OXBFEJBBKCRANO-UHFFFAOYSA-N	O=C(OCC(OC(=O)CCCCCCC)COC(=O)CCCCCCCCC)CCCCCCC	310	TRUE	TRUE	TRUE		FALSE	FALSE	null	null	100	99.5	78.5	76.3	100	23.88	190628_TT1_Hclass_Aging_001_38_9w_GF_F_Kidney_2_Pos	516.4267:712 517.43005:509 518.43341:103	169.07291:10 327.245:12 355.28052:48	0.159868	0.860137	0.151495	0.401137	1.41222	1.10618	0.661237	0.358556	1.11926	0.64731	0.644217	1.50389	0.298358	0.601209	1.76394	0.705669	2.68642	5.99246
2454	5.559	518.33	LPC 18:3/0:0	[M+H]+		0.875	TRUE	5.74	518.324	C26H48NO7P	LPC	WKQNRCYKYCKESD-UHFFFAOYSA-N	O=C(OCC(O)COP(=O)([O-])OCC[N+](C)(C)C)CCCCCCCC=CCC=CCC=CCC	310	TRUE	TRUE	TRUE		FALSE	FALSE	null	null	100	99.6	67.9	87.8	100	24.26	190628_TT1_Hclass_Aging_037_13_9w_GF_M_Kidney_1_Pos	518.32373:1100 519.32708:596 520.33044:267	81.07166:6 86.09336:18 99.06248:6 104.1067:41 124.99745:12 132.04533:18 184.07156:125 240.0898:5 309.12589:12 500.2887:18 500.31693:18 518.32202:24	0.432626	0.20951	0.313159	0.227718	0.209033	0.341714	0.239257	0.389924	0.322824	0.240733	0.463755	0.217672	0.340231	0.328311	0.266632	0.255321	0.314382	0.396938
2461	5.917	520.341	LPC 18:2/0:0	[M+H]+	adduct linked to 2659_[M+Na]+; found in higher mz's MsMs_2956; found in higher mz's MsMs_2659	0.946	TRUE	5.97	520.34	C26H50NO7P	LPC	SPJFYYJXNPEZDW-UHFFFAOYSA-N	O=C(OCC(O)COP(=O)([O-])OCC[N+](C)(C)C)CCCCCCCC=CCC=CCCCCC	310	TRUE	TRUE	TRUE		FALSE	FALSE	null	null	100	100	76.1	91.9	100	824.98	190628_TT1_Hclass_Aging_005_33_18M_SPF_F_Kidney_3_Pos	520.33954:74274 521.34289:48907 522.34625:9369	71.07117:114 80.96946:12 81.0705:60 86.09475:915 93.06976:24 95.08261:24 98.97877:36 98.98296:60 101.03586:12 104.10675:3531 111.07747:24 124.99744:380 127.98794:10 132.0453:36 137.13374:24 153.12552:24 163.0105:36 163.01945:60 165.53908:24 166.05943:253 181.02483:70 183.4893:48 184.07138:9535 185.05501:24 186.62354:24 199.03766:48 229.78166:10 240.10464:36 258.11115:136 337.26788:213 443.25702:8…	27.9547	25.8453	27.5748	18.2649	19.6777	27.5241	22.4828	26.6922	26.3286	28.4026	32.8388	24.0467	26.8387	34.049	19.6365	26.8961	32.1338	34.7738
2483	6.351	522.355	LPC 18:1/0:0	[M+H]+	adduct linked to 2666_[M+Na]+; adduct linked to 7083_[2M+H]+; found in higher mz's MsMs_7083; similar chromatogram in higher mz_2703; found in higher mz's MsMs_2998	0.946	TRUE	6.27	522.355	C26H52NO7P	LPC	YAMUFBLWGFFICM-UHFFFAOYSA-N	O=C(OCC(O)COP(=O)([O-])OCC[N+](C)(C)C)CCCCCCCC=CCCCCCCCC	310	TRUE	TRUE	TRUE		FALSE	FALSE	null	null	100	99.9	77.4	92	100	797.28	190628_TT1_Hclass_Aging_QC_Pos_01	522.3551:264566 523.35845:159940 524.36181:31989	71.07357:307 79.05297:24 81.06928:60 83.04831:24 83.08284:36 86.10001:3241 86.5302:24 95.0813:48 95.08677:79 97.09769:48 98.98302:95 104.10538:10302 104.81958:24 109.09593:36 111.12043:24 121.09863:12 124.99909:2162 127.67866:10 135.11691:48 139.14748:36 147.06281:10 149.13068:48 159.66353:10 163.01419:178 163.15396:24 166.06316:1028 181.02682:106 183.48183:81 184.06007:60 184.07339:33783 184.812…	35.6822	31.3355	35.4808	22.8662	19.4795	32.6231	44.3941	43.6673	44.5036	41.5461	70.1008	40.8058	31.7577	45.0391	41.675	32.1624	57.9418	47.7578
2500	6.855	524.37	LPC 18:0/0:0	[M+H]+	adduct linked to 2675_[M+Na]+; found in higher mz's MsMs_7085; found in higher mz's MsMs_3017; similar chromatogram in higher mz_2995; similar chromatogram in higher mz_7106; similar chromatogram in higher mz_7152; found in higher mz's MsMs_5081	0.964	TRUE	6.73	524.371	C26H54NO7P	LPC	IHNKQIMGVNPMTC-UHFFFAOYSA-N	O=C(OCC(O)COP(=O)([O-])OCC[N+](C)(C)C)CCCCCCCCCCCCCCCCC	310	TRUE	TRUE	TRUE		FALSE	FALSE	null	null	100	99.8	76.5	91.1	100	4539.56	190628_TT1_Hclass_Aging_QC_Pos_01	524.37048:1274450 525.37383:791385 526.37719:135877	70.06216:60 71.07232:1556 71.08415:537 71.75175:24 79.0479:12 79.71549:10 80.97321:102 81.0692:298 83.08403:247 85.1003:369 86.09601:17915 86.76522:24 87.88895:24 89.05963:48 95.08394:323 97.10036:171 98.98291:841 99.11837:60 103.07274:24 103.77625:162 104.1067:69049 104.54096:48 104.65289:36 104.86832:36 105.45252:24 106.48384:36 106.98832:36 107.08413:36 109.10022:134 111.1144:77 113.1276:24 12…	201.693	159.697	238.489	157.464	155.576	198.612	161.374	203.024	208.499	198.875	234.771	190.408	234.371	167.153	247.333	160.881	209.825	210.705
2504	5.894	526.293	LPE 22:6	[M+H]+	adduct linked to 2685_[M+Na]+; adduct linked to 7091_[2M+H]+; found in higher mz's MsMs_7091	0.946	TRUE	5.69	526.293	C27H44NO7P	LPE	XEVRBOQZSXWGQO-UHFFFAOYSA-N	O=C(OCC(O)COP(=O)(O)OCCN)CCC=CCC=CCC=CCC=CCC=CCC=CCC	310	TRUE	TRUE	TRUE		FALSE	FALSE	null	null	100	99.5	43.4	74.7	100	1020.21	190628_TT1_Hclass_Aging_011_19_18M_GF_M_Kidney_2_Pos	526.29242:53997 527.29577:35458 528.29913:7199	77.03699:36 79.05005:146 81.06634:85 86.09961:10 91.05134:84 93.0708:106 95.08504:48 98.97988:12 105.06074:24 105.06937:82 107.08393:60 109.10003:24 117.07292:36 119.08557:80 121.09839:36 125.00043:12 128.06084:24 129.06953:84 131.08595:109 133.09534:77 135.08414:24 141.06564:48 143.08603:60 145.09714:95 147.11375:36 157.1012:24 159.11787:36 161.13315:36 167.08273:24 171.10966:24 171.12251:48 172…	17.3825	80.5413	19.4144	52.9353	15.5753	19.4426	26.7365	22.0979	41.8906	48.5732	42.1999	26.5317	21.7894	35.942	20.4449	67.6696	45.3311	33.1108
2523	6.337	529.399	LPC 18:1(d7)	[M+H]+	adduct linked to 2417_[M+H-H2O]+; adduct linked to 7103_[2M+H]+; found in higher mz's MsMs_7111; found in higher mz's MsMs_7103; found in higher mz's MsMs_3037; similar chromatogram in higher mz_3371	0.982	TRUE	6.33	529.399	C26H45NO7P	LPC	YAMUFBLWGFFICM-HNNXNMBSNA-N	C(COP(=O)([O-])OCC[N+](C)(C)C)([H])(O)COC(CCCCCCC/C=C\CCCCCC([2H])([2H])C([2H])([2H])C([2H])([2H])[2H])=O	annotated by user-defined text library	TRUE	TRUE	FALSE		TRUE	FALSE	null	null	100	100	null	null	null	16677.6	190628_TT1_Hclass_Aging_048_40_12M_GF_F_Kidney_1_Pos	529.39948:590122 530.40283:357060 531.40619:62958	70.07492:36 71.07098:564 72.08478:24 74.0989:48 77.03719:24 77.12712:12 80.97053:102 81.06778:75 83.08132:36 85.09885:24 86.09586:6027 87.09474:24 88.1152:24 93.0628:24 93.07092:36 95.08789:60 96.08797:36 97.09744:73 98.98555:286 103.7761:62 104.10655:23484 105.10683:105 105.23346:24 106.5141:24 107.08543:48 109.09714:24 111.11129:24 115.13765:24 121.09064:12 121.09991:60 124.99882:3375 135.11337…	189.137	189.137	189.137	189.137	189.137	189.137	189.137	189.137	189.137	189.137	189.137	189.137	189.137	189.137	189.137	189.137	189.137	189.137
2617	7.134	538.386	LPC 19:0/0:0	[M+H]+		0.946	TRUE	7.09	538.387	C27H56NO7P	LPC	WYIMORDZGCUBAA-UHFFFAOYSA-N	O=C(OCC(O)COP(=O)([O-])OCC[N+](C)(C)C)CCCCCCCCCCCCCCCCCC	310	TRUE	TRUE	TRUE		FALSE	FALSE	null	null	100	100	72.9	93.9	100	26.1	190628_TT1_Hclass_Aging_037_13_9w_GF_M_Kidney_1_Pos	538.38531:6281 539.38866:4141 540.39202:924	86.09565:93 104.10633:233 124.9923:36 126.14483:10 147.06226:12 163.02258:12 177.05534:10 184.07471:660 255.20856:12 265.01837:24 281.04239:12 283.05014:36 299.07565:24 301.05905:24 346.966:12 417.04187:12 520.35071:12 520.36987:86 522.2569:10 538.38068:136 538.39368:158	0.810655	1.50418	0.787096	1.80592	0.956146	0.898996	0.637924	1.01713	1.23191	1.79996	1.09962	0.857119	1.34255	1.61163	0.587359	1.35284	1.13026	1.20856
2660	5.494	542.324	LPC 20:5	[M+H]+		0.839	TRUE	5.52	542.324	C28H48NO7P	LPC	PDIGSOAOQOXRDU-UHFFFAOYSA-N	O=C(OCC(O)COP(=O)([O-])OCC[N+](C)(C)C)CCCC=CCC=CCC=CCC=CCC=CCC	310	TRUE	TRUE	TRUE		FALSE	FALSE	null	null	100	100	59.8	91.8	100	9.58	190628_TT1_Hclass_Aging_043_37_9w_GF_F_Kidney_1_Pos	542.32507:1121 543.32842:819 544.33178:213	84.08293:10 99.06203:12 104.10336:60 135.09665:24 149.0237:36 184.06113:12 184.07256:264 262.26343:10 450.2312:12 457.1441:36 457.1651:87 524.31018:24 542.28705:103 542.31647:60	0.376432	0.182477	0.252567	0.15738	0.190752	0.267428	0.201465	0.32415	0.260905	0.227728	0.411476	0.242597	0.288141	0.298109	0.207512	0.208383	0.255663	0.264534
2667	5.762	544.339	LPC 20:4	[M+H]+		0.107	TRUE	5.86	544.34	C28H50NO7P	LPC	GOMVPVRDBLLHQC-UHFFFAOYSA-N	O=C(OCC(O)COP(=O)([O-])OCC[N+](C)(C)C)CCCCCCC=CCC=CCC=CCC=CCC	310	TRUE	TRUE	TRUE		FALSE	FALSE	null	null	100	99.9	89	55.4	100	2450.67	190628_TT1_Hclass_Aging_025_36_24M_SPF_F_Kidney_5_Pos	544.3385:56227 545.34185:40497 546.34521:8478	71.07097:48 86.09459:713 98.97724:36 98.98282:60 104.1052:184 119.0673:12 121.0954:12 124.99581:391 159.04706:12 166.05949:106 181.99094:10 184.07341:12557 185.05322:24 186.3037:24 240.12021:10 258.10254:48 524.64417:10 526.33282:86 544.33759:113	9.40091	8.13505	12.5374	6.41889	7.26104	8.8369	9.32279	12.0399	11.1832	10.5328	13.9878	10.6526	12.4972	8.55287	15.6417	7.59806	10.3392	10.3168
2668	5.879	544.34	LPC 20:4/0:0	[M+H]+	adduct linked to 2867_[M+Na]+; found in higher mz's MsMs_3170	0.839	TRUE	5.86	544.34	C28H50NO7P	LPC	GOMVPVRDBLLHQC-UHFFFAOYSA-N	O=C(OCC(O)COP(=O)([O-])OCC[N+](C)(C)C)CCCCCCC=CCC=CCC=CCC=CCC	310	TRUE	TRUE	TRUE		FALSE	FALSE	null	null	100	100	81.6	93.8	100	1292.02	190628_TT1_Hclass_Aging_045_30_12M_SPF_F_Kidney_3_Pos	544.33948:68358 545.34283:49097 546.34619:10006	71.06839:36 77.03941:12 83.04653:10 86.09298:768 87.98852:10 91.04985:36 98.97826:24 103.77433:24 104.10622:2331 105.06766:24 119.08211:24 119.0913:12 124.99998:921 129.04993:24 131.08707:24 133.09967:24 163.01695:24 166.0587:555 167.44846:10 181.02026:36 183.48093:48 184.07249:6967 184.57733:24 184.80998:24 199.14771:24 203.17567:24 239.17619:12 240.10152:48 258.10788:116 331.2637:10 361.25192:2…	11.216	16.9762	14.699	7.5355	9.47482	10.3593	16.1828	19.1757	16.9141	15.395	19.7409	20.937	15.1127	16.0218	16.9161	16.493	23.2595	20.5741
2676	6.152	546.355	LPC 20:3	[M+H]+		0.786	TRUE	6.1	546.355	C28H52NO7P	LPC	XUDGAAFUMTTZCO-UHFFFAOYSA-N	O=C(OCC(O)COP(=O)([O-])OCC[N+](C)(C)C)CCCCCCCCCC=CCC=CCC=CCC	310	TRUE	TRUE	TRUE		FALSE	FALSE	null	null	100	100	89.7	93.6	100	302.81	190628_TT1_Hclass_Aging_025_36_24M_SPF_F_Kidney_5_Pos	546.35339:5595 547.35674:3525 548.3601:910	86.10221:12 129.07092:10 166.05914:12 184.07112:238 528.35205:24 546.34839:80	2.37322	2.04721	2.2944	1.42815	1.04861	2.08616	2.06835	2.48746	2.27469	2.57916	3.69477	2.16177	1.64303	3.0345	1.59063	2.05782	3.44528	3.13155
2690	6.52	548.37	LPC 20:2/0:0	[M+H]+		0.893	TRUE	6.57	548.371	C28H54NO7P	LPC	YYQVCMMXPIJVHY-UHFFFAOYSA-N	O=C(OCC(O)COP(=O)([O-])OCC[N+](C)(C)C)CCCCCCCCCC=CCC=CCCCCC	310	TRUE	TRUE	TRUE		FALSE	FALSE	null	null	100	100	71.1	93.6	100	42.18	190628_TT1_Hclass_Aging_025_36_24M_SPF_F_Kidney_5_Pos	548.37183:1556 549.37518:1104 550.37854:385	99.07904:10 104.10363:36 132.03864:12 182.09483:10 184.07127:111 236.98611:10 283.29633:10 343.14828:10 530.35083:12 548.37762:48	0.572152	0.384935	0.536929	0.41382	0.363489	0.537659	0.457771	0.540343	0.472838	0.591594	0.662004	0.486301	0.412883	0.690461	0.394036	0.416766	0.549817	0.572475
2699	6.914	550.389	LPC 20:1/0:0	[M+H]+	adduct linked to 2411_[M+H-H2O]+	0.946	TRUE	6.99	550.387	C28H56NO7P	LPC	YYSFWGQAKJTHRE-UHFFFAOYSA-N	O=C(OCC(O)COP(=O)([O-])OCC[N+](C)(C)C)CCCCCCCCCC=CCCCCCCCC	310	TRUE	TRUE	TRUE		FALSE	FALSE	null	null	100	99.9	78.9	92.1	100	29.19	190628_TT1_Hclass_Aging_048_40_12M_GF_F_Kidney_1_Pos	550.3855:2579 551.38885:1596 552.39221:175	86.09725:36 104.0995:12 104.10236:60 184.05997:12 184.06949:184 190.99051:10 339.31473:10 532.3689:48 550.36707:60	0.729877	1.06313	0.811993	1.00378	0.595571	0.795557	0.784831	0.918333	1.00647	1.2507	1.18773	0.823887	0.721037	0.917258	0.804921	0.7555	1.08868	1.1788
2878	5.715	568.338	LPC 22:6	[M+H]+		0.089	TRUE	5.67	568.34	C30H50NO7P	LPC	LSOWKZULVQWMLY-UHFFFAOYSA-N	O=C(OCC(O)COP(=O)([O-])OCC[N+](C)(C)C)CCC=CCC=CCC=CCC=CCC=CCC=CCC	310	TRUE	TRUE	TRUE		FALSE	FALSE	null	null	100	100	89.6	54.2	100	1532.82	190628_TT1_Hclass_Aging_QC_Pos_03	568.34027:77107 569.34362:51897 570.34698:11969	71.06878:36 71.07233:191 79.05168:24 86.09608:1388 91.05439:24 98.98442:173 104.10827:217 124.99761:808 129.06667:12 132.04388:48 166.04529:12 166.05975:204 183.11166:12 183.48019:98 184.07368:24257 185.07449:36 185.58835:24 186.92693:24 240.09225:12 251.08186:10 258.1051:60 366.79614:10 385.27286:48 491.25076:48 536.31769:12 550.31586:149 566.51312:24 568.33478:210	6.79686	9.59193	8.65326	7.55426	6.71316	6.38379	5.27872	7.33029	9.89863	10.2107	15.6672	6.58611	9.04695	7.70497	8.74388	8.51799	7.53533	7.57976
2879	5.826	568.341	LPC 22:6/0:0	[M+H]+	adduct linked to 3048_[M+Na]+	0.875	TRUE	5.67	568.34	C30H50NO7P	LPC	LSOWKZULVQWMLY-UHFFFAOYSA-N	O=C(OCC(O)COP(=O)([O-])OCC[N+](C)(C)C)CCC=CCC=CCC=CCC=CCC=CCC=CCC	310	TRUE	TRUE	TRUE		FALSE	FALSE	null	null	100	99.7	79	92.1	100	563.49	190628_TT1_Hclass_Aging_009_20_18M_GF_M_Kidney_3_Pos	568.33893:51234 569.34228:36309 570.34564:7997	71.07427:81 74.05758:12 79.04625:12 86.09043:59 86.09563:635 91.04457:12 97.0378:10 98.98955:36 104.10638:2484 105.06926:36 109.57235:10 119.08697:24 124.99087:24 124.99872:327 131.08418:24 141.06712:10 155.08321:24 157.10626:36 163.01395:36 166.0593:127 171.11125:12 179.05165:12 183.48546:48 184.07326:6989 185.05688:24 187.14526:24 193.89861:10 258.10699:109 323.2572:10 368.93005:10 385.27539:48…	8.40827	19.89	10.2436	9.73121	6.2935	8.03406	10.1747	11.7257	14.4199	13.9025	15.4543	13.2478	10.8364	13.6084	8.68062	16.0554	16.4302	13.0615
2891	6.04	570.355	LPC 22:5	[M+H]+	adduct linked to 1437_[M-C6H10O4+H]+	0.679	TRUE	5.96	570.355	C30H52NO7P	LPC	BIEOSECQPGGZMF-UHFFFAOYSA-N	O=C(OCC(O)COP(=O)([O-])OCC[N+](C)(C)C)CCCCCC=CCC=CCC=CCC=CCC=CCC	310	TRUE	TRUE	TRUE		FALSE	FALSE	null	null	100	99.9	78.9	93.4	100	26.8	190628_TT1_Hclass_Aging_008_43_18M_GF_F_Kidney_1_Pos	570.35504:1412 571.35839:912 572.36175:371	86.09419:12 86.0981:24 159.06625:24 176.11592:12 184.0694:119 552.32623:12 570.35437:36	0.436138	0.439296	0.372851	0.370738	0.282949	0.368625	0.404066	0.391867	0.402756	0.427509	0.462581	0.392696	0.378887	0.487433	0.345262	0.416168	0.467218	0.393116
2907	6.388	572.369	LPC 22:4	[M+H]+		0.732	TRUE	6.25	572.371	C30H54NO7P	LPC	GXEIJYZRCDTJTE-UHFFFAOYSA-N	O=C(OCC(O)COP(=O)([O-])OCC[N+](C)(C)C)CCCCCCCCC=CCC=CCC=CCC=CCC	310	TRUE	TRUE	TRUE		FALSE	FALSE	null	null	100	99.8	67.2	90.4	100	35.85	190628_TT1_Hclass_Aging_032_23_24M_GF_M_Kidney_2_Pos	572.36993:982 573.37328:861 574.37664:141	104.11642:12 166.06631:12 184.07106:48 187.85202:10 449.42307:10 521.94965:10 554.40314:12 572.3775:48	0.21296	0.189823	0.199174	0.163242	0.210357	0.20856	0.189246	0.21647	0.220658	0.201164	0.264919	0.253674	0.163398	0.201629	0.204851	0.179084	0.297525	0.263988
2909	12.953	572.559	DG O-32:0|DG O-16:0_16:0	[M+NH4]+	similar chromatogram in higher mz_7001; similar chromatogram in higher mz_3451; similar chromatogram in higher mz_5574	0.929	TRUE	12.7	572.561	C35H70O4	EtherDG	QFQQWVCLUZKAOS-UHFFFAOYSA-N	O=C(OC(CO)COCCCCCCCCCCCCCCCC)CCCCCCCCCCCCCCC	310	TRUE	TRUE	TRUE		FALSE	FALSE	null	null	100	99.2	59.3	69.5	100	73.17	190628_TT1_Hclass_Aging_033_12_24M_SPF_M_Kidney_5_Pos	572.56232:1344 573.56567:857 574.56903:163	85.10002:24 109.09992:24 297.27063:10 313.27094:157 407.18057:10 537.51166:36	0.679643	5.3547	0.455801	5.29595	0.885154	0.52036	0.836333	0.547357	1.34598	1.83991	0.993142	0.675561	0.515292	1.30273	0.514045	2.2156	2.10747	0.875565
2999	7.88	580.432	LPC 22:0	[M+H]+		0.946	TRUE	7.73	580.434	C30H62NO7P	LPC	UIINDYGXBHJQHX-UHFFFAOYSA-N	O=C(OCC(O)COP(=O)([O-])OCC[N+](C)(C)C)CCCCCCCCCCCCCCCCCCCCC	310	TRUE	TRUE	TRUE		FALSE	FALSE	null	null	100	99.8	75	93.5	100	70.09	190628_TT1_Hclass_Aging_QC_Pos_01	580.43304:3278 581.43639:2294 582.43975:634	86.09303:24 104.09908:12 104.10338:60 117.08925:24 159.11526:10 184.0705:381 193.1364:12 263.26846:12 359.32321:10 517.23895:12 527.47217:24 562.42773:36 580.39203:12 580.42242:126	0.663147	0.457808	0.536929	0.621316	0.585239	0.615309	0.337574	0.429333	0.55671	0.506093	0.4943	0.467746	0.49842	0.510644	0.39581	0.495395	0.448394	0.393116
3018	9.893	582.508	DG 32:2|DG 14:0_18:2	[M+NH4]+	similar chromatogram in higher mz_7179	0.232	TRUE	9.73	582.509	C35H64O5	DG	WVBVUWWRPSWGDS-UHFFFAOYSA-N	O=C(OCC(OC(=O)CCCCCCCC=CCC=CCCCCC)CO)CCCCCCCCCCCCC	310	TRUE	TRUE	TRUE		FALSE	FALSE	null	null	100	99.7	77.9	84.8	100	96.8	190628_TT1_Hclass_Aging_028_9_18M_SPF_M_Kidney_4_Pos	582.5119:1342 583.51525:1446 584.51861:659	95.07998:12 153.12936:10 211.19711:12 285.2301:12 285.23959:36 337.27444:24 547.45312:36	0.216004	2.56182	0.245557	0.831132	1.53534	0.706857	0.920294	0.329428	1.01599	0.631351	0.495117	1.16231	0.348772	0.433727	1.27099	1.85513	2.86051	1.91894
3019	9.811	582.51	DG 32:2|DG 16:1_16:1	[M+NH4]+	similar chromatogram in higher mz_4751; similar chromatogram in higher mz_5558; similar chromatogram in higher mz_4670	0.304	TRUE	9.64	582.509	C35H64O5	DG	HSQHRRHRYJNSOC-UHFFFAOYSA-N	O=C(OCC(OC(=O)CCCCCCCC=CCCCCCC)CO)CCCCCCCC=CCCCCCC	310	TRUE	TRUE	TRUE		FALSE	FALSE	null	null	100	99.5	64.9	82.4	100	117.02	190628_TT1_Hclass_Aging_035_16_12M_GF_M_Kidney_1_Pos	582.50983:4407 583.51318:3926 584.51654:1316	79.055:12 93.05985:12 109.10127:12 121.09346:12 121.09809:48 135.118:24 193.04713:10 237.21246:24 264.26282:24 285.24985:60 311.25256:249 314.53876:10 337.29318:12 371.44745:10 547.47968:161	0.234983	2.5953	0.0509183	0.829694	1.47526	0.700196	0.920294	0.328583	0.971611	0.631351	0.556188	1.0117	0.112761	0.318118	1.30112	1.92251	3.00954	1.72678
3027	10.74	584.524	DG 32:1|DG 16:0_16:1	[M+NH4]+	similar chromatogram in higher mz_4069	0.768	TRUE	10.44	584.525	C35H66O5	DG	ADLOEVQMJKYKSR-UHFFFAOYSA-N	O=C(OCC(OC(=O)CCCCCCCC=CCCCCCC)CO)CCCCCCCCCCCCCCC	310	TRUE	TRUE	TRUE		FALSE	FALSE	null	null	100	99.2	77.3	90.7	100	340.35	190628_TT1_Hclass_Aging_QC_Pos_01	584.52124:6330 585.52459:3818 586.52795:984	71.08509:12 83.08504:36 95.08362:24 211.19972:36 225.15895:24 225.8058:24 239.23486:24 268.68298:10 285.23743:60 311.25189:369 313.25034:12 313.2702:456 339.26669:12 339.28735:48 523.24994:10 549.48254:173	2.76738	8.90942	1.62446	3.69983	8.05784	6.68975	5.17284	2.4572	5.41381	4.61458	4.03291	7.68546	2.3588	3.23627	10.5831	7.8697	13.5429	7.73141
3032	11.834	586.538	DG 32:0|DG 16:0_16:0	[M+NH4]+		0.036	TRUE	11.52	586.541	C35H68O5	DG	JEJLGIQLPYYGEE-UHFFFAOYSA-N	O=C(OCC(OC(=O)CCCCCCCCCCCCCCC)CO)CCCCCCCCCCCCCCC	310	TRUE	TRUE	TRUE		FALSE	FALSE	null	null	100	99	82.4	81.3	100	576.06	190628_TT1_Hclass_Aging_002_4_12M_SPF_M_Kidney_1_Pos	586.5379:9343 587.54125:4368 588.54461:1174	81.07585:12 95.0857:24 103.08457:10 117.0857:10 221.22803:12 239.23013:36 313.2775:755 509.16623:10 551.50806:585	7.94514	15.6438	5.94183	13.0033	5.47113	7.3608	7.39397	5.56395	7.41782	8.39042	4.11216	9.45567	4.73596	5.19851	10.3007	9.60804	15.3866	4.85169
3033	12.068	586.539	DG 32:0|DG 16:0_16:0	[M+NH4]+		0.196	TRUE	11.52	586.541	C35H68O5	DG	JEJLGIQLPYYGEE-UHFFFAOYSA-N	O=C(OCC(OC(=O)CCCCCCCCCCCCCCC)CO)CCCCCCCCCCCCCCC	410	TRUE	TRUE	TRUE		FALSE	FALSE	null	null	100	96.3	77.1	78.4	100	647.1	190628_TT1_Hclass_Aging_022_44_18M_GF_F_Kidney_2_Pos	586.53876:11377 587.54211:5828 588.54547:1446	83.09431:12 95.08129:24 109.10329:24 123.11282:24 239.2364:36 313.25995:114 313.26743:1797 317.30115:24 547.84015:10 551.50824:181 569.51971:10	14.1722	16.2684	12.2064	13.6605	14.0844	16.818	11.3445	10.4243	14.4516	13.9561	15.3435	14.2806	14.1699	12.9505	18.0716	16.7164	19.7559	12.4744
3034	11.989	586.54	DG 32:0|DG 16:0_16:0	[M+NH4]+	similar chromatogram in higher mz_3414	0.732	TRUE	11.52	586.541	C35H68O5	DG	JEJLGIQLPYYGEE-UHFFFAOYSA-N	O=C(OCC(OC(=O)CCCCCCCCCCCCCCC)CO)CCCCCCCCCCCCCCC	310	TRUE	TRUE	TRUE		FALSE	FALSE	null	null	100	97.1	81.8	83	100	855.48	190628_TT1_Hclass_Aging_019_17_12M_GF_M_Kidney_2_Pos	586.53961:22459 587.54296:10904 588.54632:2528	71.08207:69 81.06326:12 81.06831:36 83.08315:48 85.09812:48 90.46259:10 95.0817:48 109.09498:12 123.12115:24 127.15031:12 159.14716:12 221.23302:24 239.23538:108 257.25046:48 313.27393:1596 551.37592:12 551.50116:871 560.01562:10	13.5287	16.4844	11.8048	12.4699	12.5444	16.3301	9.78194	10.17	14.0589	14.3229	15.0752	11.3383	14.0348	12.734	17.3542	14.3975	20.2847	12.4005
3133	12.97	598.576	DG O-34:1|DG O-18:1_16:0	[M+NH4]+	adduct linked to 2841_[M+H-H2O]+; adduct linked to 3002_[M+H]+; similar chromatogram in higher mz_4000	0.946	TRUE	12.75	598.577	C37H72O4	EtherDG	KRCAFDJIIDJILQ-UHFFFAOYSA-N	O=C(OC(CO)COCCCCCCCCC=CCCCCCCCC)CCCCCCCCCCCCCCC	310	TRUE	TRUE	TRUE		FALSE	FALSE	null	null	100	99.4	73.6	75	100	240.04	190628_TT1_Hclass_Aging_033_12_24M_SPF_M_Kidney_5_Pos	598.57336:4771 599.57671:3569 600.58007:992	75.04398:12 83.08:12 83.08639:36 85.1001:24 97.09878:60 239.18346:24 239.24423:24 313.26874:1769 313.28116:1624 339.29108:36 563.53259:153	1.22824	14.9389	0.968268	11.0233	1.37846	1.38041	2.37706	1.4064	3.62593	6.38297	3.14883	2.24059	1.06271	3.82905	1.29264	6.47947	7.55022	3.30837
3161	13.214	600.587	DG O-34:0|DG O-18:0_16:0	[M+NH4]+		0.554	TRUE	13.2	600.593	C37H74O4	EtherDG	GPKLYFVEVWPJKU-UHFFFAOYSA-N	O=C(OC(CO)COCCCCCCCCCCCCCCCCCC)CCCCCCCCCCCCCCC	310	TRUE	TRUE	TRUE		FALSE	FALSE	null	null	100	100	49.5	60.7	100	83.73	190628_TT1_Hclass_Aging_047_1_9w_SPF_M_Kidney_1_Pos	600.59192:1804 601.59527:1403 602.59863:371	85.10279:24 216.123:10 257.2464:10 264.27036:24 313.24933:12 313.27914:116 365.09625:10 565.5238:12 565.53711:48	0.622705	2.24033	0.399134	2.7738	0.63149	0.402134	0.490678	0.411363	0.746799	1.09618	0.540193	0.463834	0.399253	0.643995	0.418956	1.07579	1.03791	0.378223
3194	11.37	605.584	DG 15:0_18:1(d7)	[M+NH4]+	ion correlated with 3195	0.25	TRUE	11.42	605.584	C36H61O5	DG	GWAPRYUVSHVZHN-ZYYJJESQNA-N	OC[C@]([H])(OC(CCCCCCC/C=C\CCCCCC([2H])([2H])C([2H])([2H])C([2H])([2H])[2H])=O)COC(CCCCCCCCCCCCCC)=O	annotated by user-defined text library	TRUE	TRUE	FALSE		TRUE	FALSE	null	null	100	100	null	null	null	11707.6	190628_TT1_Hclass_Aging_016_6_12M_SPF_M_Kidney_3_Pos	605.58447:151452 606.58782:70618 607.59118:15096	71.0498:24 71.08528:302 72.0849:24 74.10264:36 77.03978:24 79.05287:79 80.05911:12 81.07045:183 82.07288:36 83.0853:170 84.09107:36 85.099:228 86.10122:24 87.11062:36 90.13413:24 95.07986:78 95.08397:307 96.08816:24 97.06583:36 97.09901:87 98.10125:24 100.11275:36 100.11977:48 102.13189:36 107.08275:36 108.09281:24 109.10029:174 111.11152:48 112.12254:36 121.08936:12 121.10326:153 123.11741:60 12…	170.074	170.074	170.074	170.074	170.074	170.074	170.074	170.074	170.074	170.074	170.074	170.074	170.074	170.074	170.074	170.074	170.074	170.074
3202	7.89	606.445	LPC 24:1/0:0	[M+H]+		0.821	TRUE	7.75	606.449	C32H64NO7P	LPC	KXOHZVXBUOQTTL-UHFFFAOYSA-N	O=C(OCC(O)COP(=O)([O-])OCC[N+](C)(C)C)CCCCCCCCCCCC=CCCCCCCCCCC	310	TRUE	TRUE	TRUE		FALSE	FALSE	null	null	100	99.8	77.7	92.3	100	27.08	190628_TT1_Hclass_Aging_032_23_24M_GF_M_Kidney_2_Pos	606.44653:826 607.44988:668 608.45324:205	104.1007:12 104.10786:60 145.11208:10 184.07494:192 588.39362:12 589.45264:10 606.45715:60	0.209129	0.219795	0.140681	0.231235	0.18095	0.214167	0.147476	0.176506	0.251617	0.237689	0.251115	0.20161	0.186976	0.327472	0.176474	0.243662	0.227288	0.190006
3215	8.331	608.464	LPC 24:0/0:0	[M+H]+		0.946	TRUE	8.2	608.465	C32H66NO7P	LPC	SKJMUADLQLZAGH-UHFFFAOYSA-N	O=C(OCC(O)COP(=O)([O-])OCC[N+](C)(C)C)CCCCCCCCCCCCCCCCCCCCCCC	310	TRUE	TRUE	TRUE		FALSE	FALSE	null	null	100	99.8	87.7	92.6	100	44.77	190628_TT1_Hclass_Aging_014_11_24M_SPF_M_Kidney_4_Pos	608.46533:3942 609.46868:3494 610.47204:484	104.09988:12 104.10561:157 117.08561:10 184.07394:491 590.43982:86 590.47394:60 608.45837:262	1.20688	0.821292	1.12995	0.993812	1.10133	1.1325	0.578252	0.745712	1.0439	0.85142	0.977146	0.793147	0.935154	1.10239	0.793393	0.974646	0.901565	0.793602
3216	10.065	608.521	DG 34:3|DG 16:1_18:2	[M+NH4]+	similar chromatogram in higher mz_4872	0.375	TRUE	9.91	608.525	C37H66O5	DG	BHGPPCIWDXQOMA-UHFFFAOYSA-N	O=C(OCC(OC(=O)CCCCCCCC=CCC=CCCCCC)CO)CCCCCCCC=CCCCCCC	310	TRUE	TRUE	TRUE		FALSE	FALSE	null	null	100	99.7	71.4	89.8	100	148.95	190628_TT1_Hclass_Aging_039_41_12M_GF_F_Kidney_2_Pos	608.5249:4332 609.52825:2399 610.53161:1271	81.06887:24 93.06668:12 93.07074:24 107.08089:12 115.07724:10 133.09666:12 137.0972:12 151.1107:12 153.12685:10 175.13196:12 199.12437:10 237.2104:12 263.20331:12 292.30307:10 311.25763:165 337.24951:12 337.28043:123 367.30536:10 449.35736:10 517.4646:12 571.60864:12 573.48883:134 591.50812:24	0.595592	6.47989	0.327684	1.35742	2.79831	1.46284	1.91255	0.489919	2.69002	1.91448	1.76817	2.4174	0.564461	1.52153	2.17575	6.25264	7.05434	8.2757
3281	12.02	612.552	DG 34:1|DG 16:0_18:1	[M+NH4]+		0.036	TRUE	11.7	612.556	C37H70O5	DG	YEJYLHKQOBOSCP-UHFFFAOYSA-N	O=C(OCC(OC(=O)CCCCCCCC=CCCCCCCCC)CO)CCCCCCCCCCCCCCC	310	TRUE	TRUE	TRUE		FALSE	FALSE	null	null	100	98.6	67.1	82.2	100	518.9	190628_TT1_Hclass_Aging_004_14_9w_GF_M_Kidney_2_Pos	612.55585:8160 613.5592:4173 614.56256:1150	79.05329:12 83.08701:24 85.09684:24 95.0803:12 97.10083:24 109.10807:12 135.10764:12 143.10179:24 147.07184:12 153.11749:24 222.08252:24 239.23888:24 252.18842:24 257.25174:12 270.0899:12 311.2493:12 313.26514:334 328.95389:24 339.28735:232 341.29855:24 355.06204:12 357.06638:36 402.16388:24 403.16907:24 417.02676:12 460.20938:12 577.51703:403	5.9514	21.3133	4.40279	11.7336	7.45372	9.86269	8.07983	5.79202	6.90066	11.6269	4.31937	14.6321	4.5052	5.07592	16.6283	13.06	27.8217	7.95486
3282	12.161	612.555	DG 34:1|DG 16:0_18:1	[M+NH4]+	ion correlated with 3283; adduct linked to 3342_[M+H]+	0.607	TRUE	11.7	612.556	C37H70O5	DG	YEJYLHKQOBOSCP-UHFFFAOYSA-N	O=C(OCC(OC(=O)CCCCCCCC=CCCCCCCCC)CO)CCCCCCCCCCCCCCC	310	TRUE	TRUE	TRUE		FALSE	FALSE	null	null	100	97	79.8	90.3	100	725.3	190628_TT1_Hclass_Aging_019_17_12M_GF_M_Kidney_2_Pos	612.5553:37666 613.55865:18807 614.56201:4689	71.08429:60 79.05558:12 81.07066:75 83.08425:82 85.10053:60 93.05376:12 95.0815:75 97.09928:60 109.09475:36 121.07737:12 121.09899:24 123.11778:24 133.05548:12 135.11736:36 163.15099:12 175.12575:12 205.20467:10 239.22401:12 239.24138:186 247.23755:36 251.18262:24 257.24091:36 265.24655:36 266.99307:24 268.99609:24 281.04214:24 283.0452:24 313.26331:276 313.27573:1508 317.297:24 339.28552:1202 34…	8.76668	19.6624	7.07025	10.6494	19.2244	18.9311	12.3193	9.61845	12.9349	15.3772	13.2729	15.8675	10.7602	10.5274	32.4027	19.9168	29.1748	21.1014
3283	12.22	612.558	DG 34:1|DG 16:0_18:1	[M+NH4]+	ion correlated with 3282; adduct linked to 3342_[M+H]+	0.286	TRUE	11.7	612.556	C37H70O5	DG	YEJYLHKQOBOSCP-UHFFFAOYSA-N	O=C(OCC(OC(=O)CCCCCCCC=CCCCCCCCC)CO)CCCCCCCCCCCCCCC	410	TRUE	TRUE	TRUE		FALSE	FALSE	null	null	100	97	74.2	85.9	100	846.49	190628_TT1_Hclass_Aging_020_7_18M_SPF_M_Kidney_1_Pos	612.55499:28176 613.55834:13600 614.5617:3650	71.08515:60 79.05647:12 81.0703:119 83.08515:36 85.09626:36 85.52784:10 93.06958:12 95.08243:122 97.09746:48 99.08053:24 103.07832:10 109.10304:48 111.08471:24 121.10306:24 132.04198:24 135.11836:48 145.11397:12 149.13049:60 157.11516:36 175.13049:12 213.18527:10 233.18045:10 257.23065:12 257.23965:36 265.21783:12 265.24527:60 283.05563:24 311.27072:24 313.26923:721 328.81815:10 339.28647:745 341…	8.58411	20.8344	7.31252	9.81973	19.5141	20.1716	12.1917	9.78908	11.8031	15.0707	12.8229	18.6822	11.1142	10.792	31.7663	18.7119	28.9322	21.1014
3294	12.989	614.572	DG 34:0|DG 16:0_18:0	[M+NH4]+	adduct linked to 2962_[M+H]+; similar chromatogram in higher mz_7019; similar chromatogram in higher mz_4103	0.964	TRUE	12.88	614.572	C37H72O5	DG	ONCLVQFEAFTXMN-UHFFFAOYSA-N	O=C(OCC(OC(=O)CCCCCCCCCCCCCCCCC)CO)CCCCCCCCCCCCCCC	310	TRUE	TRUE	TRUE		FALSE	FALSE	null	null	100	99.8	85.1	85.9	100	485.39	190628_TT1_Hclass_Aging_010_8_18M_SPF_M_Kidney_3_Pos	614.57104:7732 615.57439:6841 616.57775:2164	80.04974:24 85.09712:36 95.08473:60 97.10255:24 123.10899:12 239.2226:12 257.24844:24 264.27243:36 313.27161:1432 341.30798:453 356.0639:12 357.06015:24 571.99976:10 579.53149:416	8.41601	9.6495	7.62788	10.0268	7.70538	9.98841	6.91856	7.07257	7.48536	7.89903	6.20968	7.92884	7.51827	6.01631	14.8395	7.87419	11.0411	4.97777
3295	14.427	614.584	CE 14:0	[M+NH4]+	adduct linked to 2899_[M+H]+	0.464	TRUE	14.24	614.587	C41H72O2	CE	SJDMTGSQPOFVLR-UHFFFAOYSA-N	O=C(OC1CC2=CCC3C(CCC4(C)C(CCC34)C(C)CCCC(C)C)C2(C)CC1)CCCCCCCCCCCCC	310	TRUE	TRUE	TRUE		FALSE	FALSE	null	null	99.3	99.6	51.5	70.5	100	52.47	190628_TT1_Hclass_Aging_038_47_24M_GF_F_Kidney_3_Pos	614.58728:1144 615.59063:1061 616.59399:250	81.06639:24 147.11858:24 175.15067:24 201.1692:12 223.08626:24 359.05637:12 360.0621:24 369.33618:48 369.34967:68	0.335948	1.43576	0.188625	0.556836	1.80218	0.999494	0.877741	1.09401	1.58172	1.48253	1.56728	1.43859	0.643879	1.98746	2.2011	0.70878	1.91987	4.20318
3371	6.331	622.373	LPC 26:7	[M+H]+		0.589	TRUE	6.26	622.387	C34H56NO7P	LPC	YEYDDNKEBLRGRG-UHFFFAOYSA-N	O=C(OCC(O)COP(=O)([O-])OCC[N+](C)(C)C)CCCC=CCC=CCC=CCC=CCC=CCC=CCC=CCC	310	TRUE	TRUE	TRUE		FALSE	FALSE	null	null	100	99.9	80	70.8	100	128.86	190628_TT1_Hclass_Aging_002_4_12M_SPF_M_Kidney_1_Pos	622.37823:10583 623.38158:6972 624.38494:2362	86.09:12 86.09781:142 121.00658:10 124.99811:83 146.09517:10 183.48079:24 184.07426:2197 185.07509:36 186.07671:24 309.10718:10 313.27304:12 433.22827:10 622.36487:252	1.84353	3.10974	2.70594	2.52834	1.16359	1.37807	1.8595	3.48933	1.99267	1.65165	1.62505	2.3811	2.5165	0.629776	1.8079	3.17089	1.4261	0.447169
3395	13.919	624.572	CE 15:2	[M+NH4]+		0.107	TRUE	13.9	624.571	C42H70O2	CE	NXEUKFJIFOJRDB-UHFFFAOYSA-N	O=C(OC1CC2=CCC3C(CCC4(C)C(CCC34)C(C)CCCC(C)C)C2(C)CC1)CCCCCCC=CCC=CCCC	310	TRUE	TRUE	TRUE		FALSE	FALSE	null	null	98.8	100	44.8	70.3	100	63.62	190628_TT1_Hclass_Aging_026_2_9w_SPF_M_Kidney_2_Pos	624.57178:1220 625.57513:1211 626.57849:290	109.09906:10 131.03023:10 147.05977:12 147.11423:24 151.14609:10 175.146:24 180.93488:10 199.96399:10 203.17532:12 221.07578:12 239.09787:10 257.22485:10 273.24692:12 280.16742:12 295.10388:24 325.13519:10 369.35413:141 606.27698:10	0.0753059	0.955258	0.068863	1.42058	0.139704	0.395633	0.0371352	0.0413948	0.683986	0.864324	0.472616	0.0926702	0.0450715	0.412364	0.0608814	0.385419	0.642096	0.795196
3448	10.381	634.539	DG 36:4|DG 18:2_18:2	[M+NH4]+		0.661	TRUE	10.14	634.541	C39H68O5	DG	MQGBAQLIFKSMEM-UHFFFAOYSA-N	O=C(OCC(OC(=O)CCCCCCCC=CCC=CCCCCC)CO)CCCCCCCC=CCC=CCCCCC	310	TRUE	TRUE	TRUE		FALSE	FALSE	null	null	100	99.3	64.3	87.4	100	226.25	190628_TT1_Hclass_Aging_018_24_24M_GF_M_Kidney_3_Pos	634.53992:9587 635.54327:5790 636.54663:1976	79.05268:24 81.07025:48 83.08638:36 93.07223:12 95.08784:36 107.08104:12 109.09417:24 121.09679:24 123.11867:36 133.10657:24 143.0825:10 149.12695:24 153.12706:36 165.1582:24 175.1452:24 193.13133:12 243.20193:12 243.21289:24 257.22818:10 261.22461:36 263.24237:24 275.24173:12 311.25061:12 325.26529:12 331.25989:10 335.26614:36 337.27057:631 339.28094:60 443.42871:10 525.47583:24 573.48956:10 599…	1.13153	8.0739	1.1046	2.96504	2.69685	1.70761	2.07502	1.50101	3.46384	2.97389	1.89613	2.8856	1.44229	2.65202	2.12961	7.39693	6.21821	8.33569
3449	10.965	634.54	DG 36:4|DG 16:0_20:4	[M+NH4]+		0.786	TRUE	10.68	634.541	C39H68O5	DG	GYMMHHODMBOFGD-UHFFFAOYSA-N	O=C(OCC(OC(=O)CCCCCCC=CCC=CCC=CCC=CCC)CO)CCCCCCCCCCCCCCC	310	TRUE	TRUE	TRUE		FALSE	FALSE	null	null	100	98.9	55.1	86.9	100	619.43	190628_TT1_Hclass_Aging_015_31_18M_SPF_F_Kidney_1_Pos	634.53912:6293 635.54247:3556 636.54583:2372	83.08959:12 95.08308:48 105.06585:12 117.06612:12 129.05759:24 133.101:24 137.13446:10 143.08347:24 149.12794:24 157.10374:24 165.15205:10 171.11778:36 185.13239:24 187.15399:12 199.15359:24 203.17365:36 243.20338:12 269.21939:36 283.0192:10 287.21997:24 287.23898:48 312.24332:12 313.26819:290 361.25266:12 361.26865:60 559.29681:10 599.49341:78 617.49512:12	6.56778	6.45812	5.25115	4.18154	6.28353	6.2235	5.8576	6.88842	7.02995	6.75995	6.75787	5.89561	7.41207	6.94428	5.92469	7.72933	8.85189	6.87062
3450	11.031	634.544	DG 36:4|DG 16:0_20:4	[M+NH4]+		0.143	TRUE	10.68	634.541	C39H68O5	DG	GYMMHHODMBOFGD-UHFFFAOYSA-N	O=C(OCC(OC(=O)CCCCCCC=CCC=CCC=CCC=CCC)CO)CCCCCCCCCCCCCCC	310	TRUE	TRUE	TRUE		FALSE	FALSE	null	null	100	98.6	51.4	84.6	100	496.62	190628_TT1_Hclass_Aging_010_8_18M_SPF_M_Kidney_3_Pos	634.54022:6617 635.54357:3769 636.54693:3547	81.06607:12 95.08746:24 100.11073:10 127.15218:10 131.08392:12 143.08054:12 143.08221:24 149.15579:12 169.10333:10 189.11186:12 189.15623:24 201.1552:12 203.17223:36 231.16826:10 259.20786:12 267.20023:10 269.22015:48 287.21841:24 287.23984:48 313.25421:48 313.27158:174 323.07513:10 361.25369:24 361.28036:36 501.4097:10 599.4917:36 617.49689:24	6.08245	6.10817	5.39077	4.68626	5.84028	5.88465	5.8576	6.23802	6.35069	6.75995	6.29547	6.08332	7.13082	6.42288	5.53398	7.26891	8.86244	6.42893
3468	8.906	636.495	LPC 26:0	[M+H]+		0.964	TRUE	8.6	636.496	C34H70NO7P	LPC	WSDKRPCAPHRNNZ-UHFFFAOYSA-N	O=C(OCC(O)COP(=O)([O-])OCC[N+](C)(C)C)CCCCCCCCCCCCCCCCCCCCCCCCC	310	TRUE	TRUE	TRUE		FALSE	FALSE	null	null	100	99	85.4	93.6	100	191.71	190628_TT1_Hclass_Aging_QC_Pos_01	636.49677:5131 637.50012:3564 638.50348:908	71.07693:12 86.09457:36 104.10797:129 110.33021:10 174.05295:10 184.06911:535 427.1658:10 600.57477:12 618.48779:84 636.47998:286	0.991049	0.723149	0.931077	0.763749	0.944224	1.00103	0.755564	1.00881	0.938357	0.863042	1.077	0.879828	0.924462	1.0087	0.856356	0.8718	0.759124	0.960949
3469	11.341	636.554	DG 36:3|DG 18:1_18:2	[M+NH4]+		0.179	TRUE	11.05	636.556	C39H70O5	DG	BLZVZPYMHLXLHG-UHFFFAOYSA-N	O=C(OCC(OC(=O)CCCCCCCC=CCC=CCCCCC)CO)CCCCCCCC=CCCCCCCCC	310	TRUE	TRUE	TRUE		FALSE	FALSE	null	null	100	99.1	72.9	90.9	100	657.86	190628_TT1_Hclass_Aging_010_8_18M_SPF_M_Kidney_3_Pos	636.55548:8584 637.55883:5242 638.56219:1678	79.04084:12 83.0832:36 93.06346:24 95.08172:48 97.10089:24 107.09489:12 133.10425:10 135.11755:36 137.12955:24 147.11797:24 161.13574:12 165.16109:24 175.15376:24 233.22237:10 263.2348:48 264.26025:24 265.25342:24 313.28064:12 323.2735:10 337.27243:462 339.28027:288 343.267:10 347.32669:24 535.26331:10 571.54181:36 601.52216:294 619.52612:24	2.93367	23.6725	2.02605	7.65993	10.0411	6.1877	6.95127	4.40167	9.59068	8.76944	8.05855	10.7195	4.06857	6.97454	10.9974	23.9729	21.2593	28.5972
3471	11.273	636.558	DG 36:3|DG 18:1_18:2	[M+NH4]+		0.768	TRUE	11.05	636.556	C39H70O5	DG	BLZVZPYMHLXLHG-UHFFFAOYSA-N	O=C(OCC(OC(=O)CCCCCCCC=CCC=CCCCCC)CO)CCCCCCCC=CCCCCCCCC	310	TRUE	TRUE	TRUE		FALSE	FALSE	null	null	100	99.2	72.2	93.2	100	898.71	190628_TT1_Hclass_Aging_026_2_9w_SPF_M_Kidney_2_Pos	636.55505:12019 637.5584:6809 638.56176:1705	79.06049:12 81.0668:36 83.08929:24 91.05582:10 93.0672:24 95.08276:24 97.10333:36 107.08148:12 109.10048:24 119.08755:12 121.09575:24 133.09901:24 149.12756:12 149.13443:24 161.12466:12 181.15572:12 231.08611:10 247.24158:24 263.22751:24 265.2507:36 327.11917:10 337.25394:36 337.27454:247 339.29272:368 343.91675:10 527.47736:24 545.49829:12 571.56812:24 601.51477:178 619.53961:24	2.73755	23.6725	2.06301	7.56647	9.7447	6.1877	6.90002	3.62033	8.47241	9.1791	7.8986	10.702	4.06071	6.9148	10.0775	23.8943	20.1884	27.8355
3496	12.68	638.571	DG 36:2|DG 18:0_18:2	[M+NH4]+		0.518	TRUE	12.13	638.572	C39H72O5	DG	AJMZUFBKADIAKC-UHFFFAOYSA-N	O=C(OCC(OC(=O)CCCCCCCC=CCC=CCCCCC)CO)CCCCCCCCCCCCCCCCC	410	TRUE	TRUE	TRUE		FALSE	FALSE	null	null	100	96.2	69.6	82.2	100	307.64	190628_TT1_Hclass_Aging_003_27_9w_SPF_F_Kidney_3_Pos	638.56927:3506 639.57262:2199 640.57598:603	85.10185:24 95.08148:24 99.07816:24 109.09321:12 111.11473:24 119.08759:10 203.17303:10 262.24005:12 262.24911:36 299.05264:10 337.2739:154 341.31366:139 348.38544:10 395.7453:10 601.58197:10 603.52808:216 638.61926:12	3.90976	10.49	2.87935	6.75978	4.36636	4.76899	3.4053	2.97752	4.09485	4.75863	2.98306	5.3019	3.37365	3.5187	6.15159	7.10159	7.99598	3.94483
3497	12.359	638.572	DG 36:2|DG 18:1_18:1	[M+NH4]+		0.571	TRUE	12.14	638.572	C39H72O5	DG	AFSHUZFNMVJNKX-UHFFFAOYSA-N	O=C(OCC(OC(=O)CCCCCCCC=CCCCCCCCC)CO)CCCCCCCC=CCCCCCCCC	310	TRUE	TRUE	TRUE		FALSE	FALSE	null	null	100	99.4	74	86.9	100	597.06	190628_TT1_Hclass_Aging_019_17_12M_GF_M_Kidney_2_Pos	638.57208:26705 639.57543:15392 640.57879:4455	79.05293:12 81.0705:74 83.08153:36 93.06847:24 95.08268:73 97.10047:71 109.09746:48 121.10338:60 127.38882:10 132.0536:12 135.1171:74 137.12744:24 143.10818:10 149.13091:94 151.14594:36 163.14171:24 165.1678:12 184.07761:10 247.23706:48 251.18211:36 265.24603:128 337.27188:24 339.29004:1638 341.29608:24 401.15738:12 517.25995:36 603.51929:747 604.53662:24 621.54242:24	2.01362	15.9837	1.43064	4.67476	9.28077	5.88131	4.42264	3.13548	5.95124	8.18406	5.81926	8.60113	2.95211	3.9726	15.7885	12.1976	16.3823	15.3307
3498	12.451	638.572	DG 36:2|DG 18:1_18:1	[M+NH4]+		0.268	TRUE	12.14	638.572	C39H72O5	DG	AFSHUZFNMVJNKX-UHFFFAOYSA-N	O=C(OCC(OC(=O)CCCCCCCC=CCCCCCCCC)CO)CCCCCCCC=CCCCCCCCC	310	TRUE	TRUE	TRUE		FALSE	FALSE	null	null	100	98.6	71.6	86.3	100	679.66	190628_TT1_Hclass_Aging_016_6_12M_SPF_M_Kidney_3_Pos	638.57178:13652 639.57513:7393 640.57849:2065	81.06542:24 81.06921:48 83.08533:36 97.09905:24 107.08424:12 109.66974:10 121.10176:36 132.03902:12 135.11374:36 137.13063:12 149.12737:24 153.1275:12 163.15054:12 175.13084:12 215.16731:12 225.09717:24 247.23463:12 251.18855:36 265.24805:92 267.53595:10 313.25989:12 337.27151:24 339.28711:817 341.29312:36 393.30695:12 401.16821:36 517.24017:12 603.53235:564 621.55566:36	2.02537	17.4488	1.43064	6.88632	9.5371	5.03459	5.75729	2.85673	5.92519	8.18406	5.94576	10.558	3.30875	3.07643	15.6925	15.3306	16.5208	15.7654
3499	11.896	638.603	DG O-37:2|DG O-19:1_18:1	[M+NH4]+		0.036	TRUE	13.07	638.608	C40H76O4	EtherDG	SSFFXFVUSRBXCL-UHFFFAOYSA-N	O=C(OC(CO)COCCCCCCCCC=CCCCCCCCCC)CCCCCCCC=CCCCCCCCC	410	TRUE	TRUE	TRUE		FALSE	FALSE	null	null	100	83.7	39.9	60.1	100	83.5	190628_TT1_Hclass_Aging_034_32_18M_SPF_F_Kidney_2_Pos	638.60266:2306 639.60601:1358 640.60937:595	81.06907:24 97.10302:12 113.07529:10 132.04036:12 139.11749:12 225.09035:12 251.19243:24 265.24286:60 283.26801:60 309.12299:12 311.28543:36 337.25012:12 339.28888:334 401.16159:60 603.53082:164 638.59729:24	0.267519	0.262879	0.0919814	0.27321	0.0954578	0.160687	0.252972	0.104741	0.214198	0.205342	0.104694	0.268478	0.0891599	0.0721585	0.193944	0.795055	0.242662	0.123466
3514	13.014	640.586	DG 36:1|DG 18:0_18:1	[M+NH4]+	adduct linked to 3192_[M+H-H2O]+	0.946	TRUE	12.94	640.588	C39H74O5	DG	SAEPUUXWQQNLGN-UHFFFAOYSA-N	O=C(OCC(OC(=O)CCCCCCCC=CCCCCCCCC)CO)CCCCCCCCCCCCCCCCC	310	TRUE	TRUE	TRUE		FALSE	FALSE	null	null	100	99.9	76.5	86.6	100	564.33	190628_TT1_Hclass_Aging_003_27_9w_SPF_F_Kidney_3_Pos	640.58545:5939 641.5888:6005 642.59216:1883	71.08206:12 81.06825:36 85.09804:12 93.07144:24 97.10074:36 121.10052:12 139.12138:10 225.0932:10 251.1821:12 265.24368:24 285.27267:12 313.26501:36 339.26135:12 339.29239:361 341.30878:328 367.31772:36 605.53998:443 615.27795:24 623.56146:10	5.51035	9.96429	4.87748	7.98203	8.3629	10.8368	6.94146	6.12229	5.58942	7.26768	4.56293	12.0564	6.36706	4.24183	23.3175	7.48901	12.1344	4.70301
3515	14.468	640.603	CE 16:1	[M+NH4]+	adduct linked to 3545_[M+Na]+	0.946	TRUE	14.31	640.603	C43H74O2	CE	HODJWNWCVNUPAQ-UHFFFAOYSA-N	O=C(OC1CC2=CCC3C(CCC4(C)C(CCC34)C(C)CCCC(C)C)C2(C)CC1)CCCCCCCC=CCCCCCC	310	TRUE	TRUE	TRUE		FALSE	FALSE	null	null	99.5	99.7	54.9	70	100	911.72	190628_TT1_Hclass_Aging_002_4_12M_SPF_M_Kidney_1_Pos	640.60266:8128 641.60601:4912 642.60937:1522	81.06674:12 95.08949:24 131.06042:12 135.1169:48 145.10397:12 147.11723:87 149.12207:24 159.10725:12 161.13136:114 175.13802:12 175.14172:36 189.16438:36 193.19788:24 203.17461:36 215.17104:12 224.09155:10 233.22115:12 235.25699:12 243.2065:48 247.24513:36 273.26208:24 287.26126:24 313.26654:24 369.34167:580	8.20584	23.3866	3.16358	10.633	17.6376	14.6206	17.6628	23.3467	29.0661	37.228	45.2982	20.1183	12.1685	41.277	32.3702	14.076	37.2095	74.6186
3528	13.238	642.6	DG 36:0|DG 18:0_18:0	[M+NH4]+		0.964	TRUE	13.23	642.603	C39H76O5	DG	UHUSDOQQWJGJQS-UHFFFAOYSA-N	O=C(OCC(OC(=O)CCCCCCCCCCCCCCCCC)CO)CCCCCCCCCCCCCCCCC	310	TRUE	TRUE	TRUE		FALSE	FALSE	null	null	100	100	85.4	83	100	171.58	190628_TT1_Hclass_Aging_002_4_12M_SPF_M_Kidney_1_Pos	642.60059:1659 643.60394:1069 644.6073:444	285.27975:10 341.29062:36 341.29581:78 341.30875:60 607.55463:96	2.99603	2.77781	3.8509	2.9636	1.77632	2.44944	2.39124	2.56363	2.06286	2.29248	1.92594	2.3792	2.62432	1.51222	4.07093	2.09095	2.51894	1.15902
3530	14.877	642.619	CE 16:0	[M+NH4]+		0.929	TRUE	14.78	642.618	C43H76O2	CE	BBJQPKLGPMQWBU-UHFFFAOYSA-N	O=C(OC1CC2=CCC3C(CCC4(C)C(CCC34)C(C)CCCC(C)C)C2(C)CC1)CCCCCCCCCCCCCCC	310	TRUE	TRUE	TRUE		FALSE	FALSE	null	null	97.9	99.9	35.7	69.9	100	294.56	190628_TT1_Hclass_Aging_044_34_24M_SPF_F_Kidney_2_Pos	642.6189:12194 643.62225:10131 644.62561:2811	81.07523:36 93.07076:12 105.07212:24 109.09694:48 121.10123:12 133.10147:36 135.11638:99 137.13329:24 147.11499:181 149.12666:48 159.11375:24 159.11906:12 161.13435:114 175.13741:36 175.14854:115 189.15988:36 201.16884:48 203.17593:36 215.1662:12 215.17442:60 219.20264:24 229.19859:36 231.20831:12 233.22038:36 241.19234:12 243.21228:77 247.23331:24 257.21628:24 259.23883:60 273.25195:24 287.26752…	2.82481	9.63315	1.59882	3.03281	10.6175	4.93203	6.17288	6.78875	7.80993	10.7227	11.7216	7.05618	5.05123	11.8403	10.4435	6.2304	9.43881	19.4093
3537	12.023	644.558	MG 38:6	[M+NH4]+	adduct linked to 3415_[M+H]+	0.536	TRUE	11.3	644.561	C41H70O4	MG	PLQPJDRGVQWMRT-UHFFFAOYSA-N	O=C(OCC(O)CO)CCCCCCCCCCCCCCCCCCC=CCC=CCC=CCC=CCC=CCC=CCC	410	TRUE	TRUE	TRUE		FALSE	FALSE	null	null	100	93.6	12.2	72.9	100	334.46	190628_TT1_Hclass_Aging_026_2_9w_SPF_M_Kidney_2_Pos	644.55975:9187 645.5631:5015 646.56646:1648	77.84501:10 85.09915:24 95.0855:24 105.07127:12 119.08296:24 121.10193:24 126.04158:10 129.07317:24 131.08157:36 133.09578:12 133.09901:36 133.1152:12 141.06773:12 141.07272:24 145.106:12 147.11417:48 155.08208:36 157.09985:36 159.11298:136 161.12822:24 169.09882:24 171.11555:104 173.12949:24 175.14592:36 181.10094:12 183.11188:36 185.12817:36 195.10863:12 195.11647:24 199.10765:36 201.16615:36 2…	1.88041	9.11482	1.36108	6.75429	1.78733	1.5741	0.935809	1.4752	4.1228	5.79305	4.67241	1.12904	1.95828	5.38341	1.09656	7.23295	5.28111	3.28258
3578	6.894	650.403	LPC 28:7	[M+H]+		0.536	TRUE	6.74	650.418	C36H60NO7P	LPC	FHOQIJBDKWMQSH-UHFFFAOYSA-N	O=C(OCC(O)COP(=O)([O-])OCC[N+](C)(C)C)CCCCCC=CCC=CCC=CCC=CCC=CCC=CCC=CCC	310	TRUE	TRUE	TRUE		FALSE	FALSE	null	null	100	99.7	85.1	74.9	100	40.33	190628_TT1_Hclass_Aging_020_7_18M_SPF_M_Kidney_1_Pos	650.41101:1206 651.41436:932 652.41772:991	184.07014:497 186.08595:24 614.62866:10 650.39087:48 650.43384:48	0.416981	0.434007	0.60592	0.46628	0.308383	0.300787	0.393836	0.781791	0.344214	0.21583	0.261101	0.52978	0.673059	0.104031	0.535924	0.398529	0.259597	0.0709792
3579	6.115	650.404	LPC 28:7	[M+H]+	ion correlated with 3493; adduct linked to 3753_[M-C6H10O4+H]+	0.875	TRUE	6.74	650.418	C36H60NO7P	LPC	FHOQIJBDKWMQSH-UHFFFAOYSA-N	O=C(OCC(O)COP(=O)([O-])OCC[N+](C)(C)C)CCCCCC=CCC=CCC=CCC=CCC=CCC=CCC=CCC	410	TRUE	TRUE	TRUE		FALSE	FALSE	null	null	100	95.1	82.1	75.9	100	93.35	190628_TT1_Hclass_Aging_026_2_9w_SPF_M_Kidney_2_Pos	650.4071:2096 651.41045:1436 652.41381:1441	117.37109:10 184.07001:263 186.07434:12 293.12799:10 440.15372:10 650.37598:12 650.41895:48	1.03734	0.93501	1.47371	0.762284	0.822884	0.78098	1.11956	1.86747	0.860677	0.726349	0.974797	1.21658	1.5468	0.287762	1.18506	1.07839	0.747043	0.232593
3689	10.751	658.541	DG 38:6|DG 16:0_22:6	[M+NH4]+	similar chromatogram in higher mz_6317; adduct linked to 3520_[M+H]+	0.696	TRUE	10.31	658.541	C41H68O5	DG	BXVYQJJBMVVALQ-UHFFFAOYSA-N	O=C(OCC(OC(=O)CCC=CCC=CCC=CCC=CCC=CCC=CCC)CO)CCCCCCCCCCCCCCC	310	TRUE	TRUE	TRUE		FALSE	FALSE	null	null	100	97.5	49.5	87.2	100	607.59	190628_TT1_Hclass_Aging_003_27_9w_SPF_F_Kidney_3_Pos	658.54047:9545 659.54382:5914 660.54718:1901	81.06814:48 85.09793:12 95.08144:36 106.06462:78 109.0961:24 121.10036:24 131.07832:24 132.04237:36 133.09895:36 143.07631:12 145.09239:12 147.07323:12 149.13605:24 157.10326:12 159.14116:12 161.13164:36 169.095:12 177.09167:10 185.13177:48 187.15527:24 201.15991:24 223.14772:24 225.10553:66 227.17763:36 237.16809:12 239.23625:48 257.23776:12 275.19345:10 311.23141:48 313.26956:355 357.28851:12 3…	10.9285	21.1408	7.83895	9.19566	8.90628	8.67544	8.80603	9.78232	15.3711	16.8891	13.4052	8.92308	12.7308	14.8778	8.08443	22.4547	20.2807	12.2205
3729	12.57	662.57	DG 38:4|DG 18:0_20:4	[M+NH4]+	ion correlated with 3731; similar chromatogram in higher mz_4077	0.446	TRUE	12.26	662.572	C41H72O5	DG	BRKLTVAHEPCGNK-UHFFFAOYSA-N	O=C(OCC(OC(=O)CCCCCCC=CCC=CCC=CCC=CCC)CO)CCCCCCCCCCCCCCCCC	310	TRUE	TRUE	TRUE		FALSE	FALSE	null	null	100	98.8	59.3	84.7	100	1110.2	190628_TT1_Hclass_Aging_041_46_24M_GF_F_Kidney_2_Pos	662.57147:17202 663.57482:10503 664.57818:3035	79.05777:24 91.0502:12 93.06964:12 105.07528:12 117.07152:12 125.68231:10 129.07121:36 131.08282:24 135.11354:36 143.08942:12 145.09546:24 152.80101:10 157.10118:48 171.11325:12 171.13344:12 185.12766:24 189.16635:24 201.15764:24 203.18068:60 227.16679:12 243.21761:24 259.23309:24 269.2113:12 269.22284:84 285.27921:24 287.23065:86 340.2048:12 341.3056:579 361.24591:12 361.28058:106 381.76599:10 6…	18.0024	19.0261	10.5951	10.5243	14.8487	15.3668	13.3126	15.5355	12.9243	19.8967	11.6465	15.2847	13.7359	13.6162	9.89489	23.1768	21.8712	11.7258
3730	12.353	662.571	DG 38:4|DG 18:0_20:4	[M+NH4]+		0.089	TRUE	12.26	662.572	C41H72O5	DG	BRKLTVAHEPCGNK-UHFFFAOYSA-N	O=C(OCC(OC(=O)CCCCCCC=CCC=CCC=CCC=CCC)CO)CCCCCCCCCCCCCCCCC	310	TRUE	TRUE	TRUE		FALSE	FALSE	null	null	100	99.7	57.4	84	100	558.86	190628_TT1_Hclass_Aging_035_16_12M_GF_M_Kidney_1_Pos	662.57129:15737 663.57464:9493 664.578:2995	71.08742:36 81.07398:24 83.08376:48 91.05538:12 97.10009:24 105.07076:24 107.08097:24 117.06978:12 119.0824:24 129.05025:12 129.07097:12 131.09061:12 143.08578:12 151.15224:24 159.11047:48 161.13104:36 171.11295:36 175.11542:24 175.1507:24 183.12051:12 187.17001:12 189.15829:36 201.16922:12 203.17632:66 241.1972:12 259.24167:24 269.23386:79 283.21817:10 285.28345:48 287.23727:81 341.27652:12 341.…	8.35907	14.7966	4.45042	10.7299	3.35504	5.56077	6.51947	6.08006	5.26812	9.64189	2.01318	7.5163	3.00915	3.5249	4.16508	9.00838	16.1397	3.4527
3731	12.625	662.571	DG 38:4|DG 18:0_20:4	[M+NH4]+	ion correlated with 3729; adduct linked to 3544_[M+H]+	0.518	TRUE	12.26	662.572	C41H72O5	DG	BRKLTVAHEPCGNK-UHFFFAOYSA-N	O=C(OCC(OC(=O)CCCCCCC=CCC=CCC=CCC=CCC)CO)CCCCCCCCCCCCCCCCC	310	TRUE	TRUE	TRUE		FALSE	FALSE	null	null	100	98.4	51.9	85.2	100	1005.22	190628_TT1_Hclass_Aging_020_7_18M_SPF_M_Kidney_1_Pos	662.57111:22057 663.57446:14578 664.57782:4273	79.04776:12 85.10276:36 95.08246:36 97.10025:36 105.06518:24 109.10161:36 117.06997:36 119.08412:48 123.11569:60 129.0696:36 131.086:36 133.09862:48 143.08939:24 145.10049:36 147.11543:36 157.09059:12 159.12842:12 161.12952:48 171.1077:12 175.14354:48 175.15468:12 184.06764:12 185.12952:60 189.12386:12 189.16438:48 193.19981:10 201.16357:24 203.17863:132 213.15871:12 213.1669:36 235.13658:12 243.…	17.4023	18.5857	10.4481	14.9992	15.0583	16.5325	13.0509	15.0692	12.4737	19.8967	11.464	13.58	12.9898	13.6162	9.09558	22.1762	21.4914	12.3718
3747	12.892	664.588	DG 38:3|DG 18:0_20:3	[M+NH4]+	similar chromatogram in higher mz_5652; similar chromatogram in higher mz_7218; similar chromatogram in higher mz_3794	0.946	TRUE	12.78	664.588	C41H74O5	DG	HNIUPWXDMUKNJU-UHFFFAOYSA-N	O=C(OCC(OC(=O)CCCCCCCCCC=CCC=CCC=CCC)CO)CCCCCCCCCCCCCCCCC	310	TRUE	TRUE	TRUE		FALSE	FALSE	null	null	100	99.8	80.5	92.3	100	148.53	190628_TT1_Hclass_Aging_013_45_18M_GF_F_Kidney_3_Pos	664.58575:3474 665.5891:3034 666.59246:1043	91.0551:12 95.08066:36 140.20493:10 177.15071:12 271.23621:12 271.24084:24 289.25531:65 331.30872:10 341.28473:24 341.30545:267 363.28619:190 629.54639:141 647.54413:24	5.58175	7.91651	2.87278	9.72626	3.40978	4.33938	3.55251	3.4573	4.6757	7.82752	3.70211	3.32215	2.27751	4.92928	2.12396	9.47665	8.04741	3.21185
3748	14.28	664.602	CE 18:3	[M+NH4]+	adduct linked to 4095_[M+ACN+Na]+	0.946	TRUE	14.3	664.603	C45H74O2	CE	FYMCIBHUFSIWCE-UHFFFAOYSA-N	O=C(OC1CC2=CCC3C(CCC4(C)C(CCC34)C(C)CCCC(C)C)C2(C)CC1)CCCCCCCC=CCC=CCC=CCC	310	TRUE	TRUE	TRUE		FALSE	FALSE	null	null	99.7	100	74.3	69.4	100	161.71	190628_TT1_Hclass_Aging_032_23_24M_GF_M_Kidney_2_Pos	664.59888:3965 665.60223:3221 666.60559:5388	135.11505:24 147.10852:12 147.11533:82 159.11417:12 161.1312:104 163.14301:12 175.13043:12 175.14157:24 179.18121:10 193.2036:24 205.19958:24 217.19276:24 229.19716:12 233.22751:36 243.19991:12 243.20428:24 247.24069:24 257.21707:12 257.22607:24 287.27322:36 369.35272:1430 440.17889:12	3.12227	7.54999	1.25937	4.22289	10.1076	6.07431	5.35591	9.57501	12.0026	10.0851	17.7978	6.98998	6.72692	11.3147	13.2956	4.55317	11.6348	25.7546
3763	13.048	666.607	DG 38:2|DG 18:1_20:1	[M+NH4]+		0.089	TRUE	13.01	666.603	C41H76O5	DG	AKCNIDZVBDSVNW-UHFFFAOYSA-N	O=C(OCC(OC(=O)CCCCCCCCCC=CCCCCCCCC)CO)CCCCCCCC=CCCCCCCCC	310	TRUE	TRUE	TRUE		FALSE	FALSE	null	null	100	100	54.5	83.1	100	101.9	190628_TT1_Hclass_Aging_033_12_24M_SPF_M_Kidney_5_Pos	666.60364:2765 667.60699:2391 668.61035:1039	97.10155:24 129.0535:12 147.11012:12 177.16949:10 225.09854:10 257.22803:10 293.26367:12 293.2829:12 339.28851:99 356.12955:10 367.3056:79 367.3298:36 369.35223:48 525.27924:10 605.54492:24 621.35052:10 631.57037:147 634.01294:10 666.62628:36	0.939932	3.47771	0.657831	2.37261	1.05404	1.07069	1.09912	1.02376	1.14914	2.34969	1.10583	1.69491	0.662799	1.58516	1.80386	2.45367	2.28023	1.16249
3765	14.555	666.616	CE 18:2	[M+NH4]+	adduct linked to 4109_[M+ACN+Na]+; adduct linked to 3804_[M+Na]+	0.946	TRUE	14.51	666.618	C45H76O2	CE	NAACPBBQTFFYQB-UHFFFAOYSA-N	O=C(OC1CC2=CCC3C(CCC4(C)C(CCC34)C(C)CCCC(C)C)C2(C)CC1)CCCCCCCC=CCC=CCCCCC	310	TRUE	TRUE	TRUE		FALSE	FALSE	null	null	99.8	100	59.5	69.4	100	3725.86	190628_TT1_Hclass_Aging_044_34_24M_SPF_F_Kidney_2_Pos	666.61761:217243 667.62096:183793 668.62432:46437	71.08509:172 79.05014:48 81.06894:412 83.08505:217 85.09615:36 91.05537:73 93.06538:24 93.06809:191 95.08365:495 97.10007:274 103.04966:12 105.06641:109 107.08092:120 109.09991:450 111.11409:236 119.08079:152 121.09818:341 123.1154:262 125.13515:106 127.14127:36 131.08247:60 133.0999:325 135.11481:1190 137.1284:215 139.14697:48 145.09505:60 147.11674:2150 149.13016:659 151.15034:279 153.16328:48 …	63.4666	145.674	31.2163	78.1552	196.514	84.6357	100.576	156.903	198.244	263.003	229.785	115.626	127.007	337.466	180.499	92.7391	157.615	377.085
3766	13.348	666.617	CE 18:2	[M+NH4]+		0.018	TRUE	14.51	666.618	C45H76O2	CE	NAACPBBQTFFYQB-UHFFFAOYSA-N	O=C(OC1CC2=CCC3C(CCC4(C)C(CCC34)C(C)CCCC(C)C)C2(C)CC1)CCCCCCCC=CCC=CCCCCC	410	TRUE	TRUE	TRUE		FALSE	FALSE	null	null	95.5	84.5	39.2	69.4	100	142.28	190628_TT1_Hclass_Aging_031_48_24M_GF_F_Kidney_6_Pos	666.61743:2507 667.62078:1548 668.62414:981	103.0601:10 123.11446:24 133.09895:12 133.10544:24 135.11388:24 147.1039:12 147.35419:10 161.12637:24 161.13171:48 175.14401:12 181.12732:10 193.19839:12 215.17989:12 219.21648:24 243.20946:12 264.2529:12 264.27115:36 369.32968:12 369.35394:184 502.2533:10 551.48901:24 631.52765:24	0.359377	2.06589	0.132861	0.664318	1.03381	0.80019	1.1917	1.11766	2.1243	2.59297	1.84703	1.02379	0.522347	3.27525	1.53608	0.850862	2.36291	6.91334
3783	14.767	668.633	CE 18:1	[M+NH4]+	adduct linked to 4119_[M+ACN+Na]+	0.018	TRUE	14.87	668.634	C45H78O2	CE	RJECHNNFRHZQKU-UHFFFAOYSA-N	O=C(OC1CC2=CCC3C(CCC4(C)C(CCC34)C(C)CCCC(C)C)C2(C)CC1)CCCCCCCC=CCCCCCCCC	310	TRUE	TRUE	TRUE		FALSE	FALSE	null	null	96	99.9	14.3	69.3	100	4473.01	190628_TT1_Hclass_Aging_024_10_24M_SPF_M_Kidney_3_Pos	668.63306:55670 669.63641:37620 670.63977:13520	71.08529:60 81.0692:162 83.08276:60 85.09902:36 93.06707:36 95.08126:227 97.09766:106 105.06681:24 107.08424:36 109.09741:155 111.11749:92 121.09251:48 121.09869:80 123.11747:71 125.13097:80 127.14814:24 132.04871:12 133.09886:48 135.11867:337 135.98123:10 137.13066:135 139.10788:24 147.10892:48 147.11401:298 149.12227:36 149.13084:575 151.14758:140 153.16052:24 157.11728:24 159.1252:12 161.12984…	4.14685	22.5694	1.73954	13.0351	5.94789	4.9826	14.1046	9.21823	9.30286	21.7321	9.74423	14.3948	2.80812	8.33009	19.5289	12.2028	12.4759	15.0438
3784	14.914	668.633	CE 18:1	[M+NH4]+	similar chromatogram in higher mz_4161	0.929	TRUE	14.87	668.634	C45H78O2	CE	RJECHNNFRHZQKU-UHFFFAOYSA-N	O=C(OC1CC2=CCC3C(CCC4(C)C(CCC34)C(C)CCCC(C)C)C2(C)CC1)CCCCCCCC=CCCCCCCCC	310	TRUE	TRUE	TRUE		FALSE	FALSE	null	null	99.1	100	50.9	69.3	100	1244.55	190628_TT1_Hclass_Aging_021_5_12M_SPF_M_Kidney_2_Pos	668.63348:62515 669.63683:51142 670.64019:14558	71.08428:114 77.0412:12 81.06433:36 81.06938:82 83.08295:139 91.05455:36 93.06998:120 95.0842:225 97.09925:102 105.06847:48 107.08592:60 109.09763:149 111.11476:71 117.06587:12 119.08305:111 121.10356:113 123.11772:140 125.12965:60 133.10074:121 135.11893:403 137.12764:48 145.10104:60 147.11769:757 149.12598:249 151.1496:97 159.10956:12 159.12018:60 161.1337:642 163.14911:107 165.16261:140 173.12…	13.4902	39.1627	8.29238	13.961	32.2332	21.0697	34.4361	31.0629	28.54	57.1152	59.1204	32.1698	24.3644	50.1935	63.6491	27.6669	39.8356	80.396
3835	14.894	675.677	CE 18:1(d7)	[M+NH4]+		0.964	TRUE	14.94	675.678	C45H71O2	CE	RJECHNNFRHZQKU-LCUGTLGDNA-N	[C@]12(CC=C3C[C@@H](OC(=O)CCCCCCC/C=C\CCCCCC([2H])([2H])C([2H])([2H])C([2H])([2H])[2H])CC[C@]3(C)[C@@]1([H])CC[C@]1(C)[C@@]([H])([C@@](C)([H])CCCC(C)C)CC[C@@]21[H])[H]	annotated by user-defined text library	TRUE	TRUE	FALSE		TRUE	FALSE	null	null	100	100	null	null	null	5779.16	190628_TT1_Hclass_Aging_016_6_12M_SPF_M_Kidney_3_Pos	675.67786:61232 676.68121:38827 677.68457:11097	71.08327:48 81.06958:107 83.08188:48 85.09942:36 91.0521:48 93.06614:36 95.08307:101 97.09672:48 105.06873:134 106.06061:113 107.08473:48 109.0979:126 111.11059:36 119.08487:36 121.09614:60 123.11491:72 125.12996:48 131.0804:12 131.08202:60 133.09946:64 135.11761:494 137.12798:60 139.1449:24 145.09464:36 147.11635:752 149.1212:36 149.13148:218 151.13962:12 151.14307:60 159.10641:12 159.1188:48 16…	100	100	100	100	100	100	100	100	100	100	100	100	100	100	100	100	100	100
3958	12.327	686.572	DG 40:6|DG 18:0_22:6	[M+NH4]+		0.179	TRUE	11.72	686.572	C43H72O5	DG	LBDXVTOFXXDOGH-UHFFFAOYSA-N	O=C(OCC(OC(=O)CCC=CCC=CCC=CCC=CCC=CCC=CCC)CO)CCCCCCCCCCCCCCCCC	410	TRUE	TRUE	TRUE		FALSE	FALSE	null	null	100	95.3	62.9	80.7	100	158.07	190628_TT1_Hclass_Aging_010_8_18M_SPF_M_Kidney_3_Pos	686.57007:4610 687.57342:3092 688.57678:1167	95.08751:24 109.09825:12 147.05888:12 155.08997:12 169.09978:12 179.17725:10 185.12346:12 203.14433:12 237.14162:12 269.2226:24 288.00146:10 328.97342:10 341.30035:275 385.25854:12 385.28061:36 431.08597:24 651.47797:12 651.52808:36 651.5603:24	2.73213	5.86539	1.59982	4.71502	1.16685	2.26044	1.53746	1.53395	4.35344	4.70959	3.753	1.94374	2.65316	4.25347	1.62875	5.85848	5.07876	2.95014
3959	12.228	686.573	DG 40:6|DG 18:0_22:6	[M+NH4]+		0.768	TRUE	11.72	686.572	C43H72O5	DG	LBDXVTOFXXDOGH-UHFFFAOYSA-N	O=C(OCC(OC(=O)CCC=CCC=CCC=CCC=CCC=CCC=CCC)CO)CCCCCCCCCCCCCCCCC	410	TRUE	TRUE	TRUE		FALSE	FALSE	null	null	100	97.9	64.5	83.9	100	209.75	190628_TT1_Hclass_Aging_010_8_18M_SPF_M_Kidney_3_Pos	686.5719:3767 687.57525:2186 688.57861:829	81.07584:24 131.08017:12 137.12772:12 197.12489:12 215.18214:10 223.08743:24 285.29428:12 293.21707:24 297.11032:12 339.27982:24 341.30396:216 355.06757:12 360.02112:24 385.26782:48 651.49646:12 651.53583:77 669.55975:24	2.6291	5.97422	1.49798	4.48208	2.11809	2.05396	1.30847	2.37357	3.89995	3.84838	3.43819	1.27254	2.49648	3.98268	1.58921	5.32395	5.17635	2.73625
3960	12.041	686.573	DG 40:6|DG 18:0_22:6	[M+NH4]+		0.071	TRUE	11.72	686.572	C43H72O5	DG	LBDXVTOFXXDOGH-UHFFFAOYSA-N	O=C(OCC(OC(=O)CCC=CCC=CCC=CCC=CCC=CCC=CCC)CO)CCCCCCCCCCCCCCCCC	310	TRUE	TRUE	TRUE		FALSE	FALSE	null	null	100	98.8	39.8	82.1	100	135.53	190628_TT1_Hclass_Aging_QC_Pos_02	686.57336:2338 687.57671:1528 688.58007:582	79.05481:6 93.06782:6 108.65023:5 129.05801:6 168.08678:5 173.13417:18 181.09818:6 185.13303:12 197.12779:6 207.03061:12 209.1255:6 213.16869:6 215.18111:12 227.03963:6 238.42258:5 255.16655:6 275.16281:5 285.27429:12 287.08545:5 293.22809:24 305.7771:5 311.23117:24 326.97614:5 341.31079:135 343.01086:18 347.5502:5 355.06662:12 357.06567:12 373.08929:5 385.26965:24 417.12653:5 429.08981:12 432.09…	1.49033	6.74946	0.72189	5.50877	0.599448	0.865046	1.10675	1.14624	1.76955	3.80138	0.724135	1.41442	0.576261	1.3586	0.800253	3.39021	5.99797	0.949471
3977	14.158	688.602	CE 20:5	[M+NH4]+		0.946	TRUE	14.23	688.603	C47H74O2	CE	XZFUGMCJZFRBKF-UHFFFAOYSA-N	O=C(OC1CC2=CCC3C(CCC4(C)C(CCC34)C(C)CCCC(C)C)C2(C)CC1)CCCC=CCC=CCC=CCC=CCC=CCC	310	TRUE	TRUE	TRUE		FALSE	FALSE	null	null	100	100	62.4	80.9	100	384.04	190628_TT1_Hclass_Aging_016_6_12M_SPF_M_Kidney_3_Pos	688.60297:3913 689.60632:2607 690.60968:7117	97.10352:24 123.11787:24 133.09605:12 133.09767:24 147.10596:12 147.11787:60 151.13943:24 159.11507:12 161.12498:48 175.14999:36 179.17285:24 199.09222:10 203.18166:24 215.17627:24 217.19193:12 229.1857:12 235.23244:12 243.20782:24 249.25169:10 369.34396:455 688.63751:24	3.96486	7.86937	1.70249	4.14519	8.83976	7.14519	7.64479	13.1566	16.2512	16.1819	23.318	9.62005	8.11046	21.0678	18.7374	6.39045	14.0683	36.4492
3987	14.415	690.617	CE 20:4	[M+NH4]+	adduct linked to 3819_[M+H]+; adduct linked to 4017_[M+Na]+; similar chromatogram in higher mz_4290	0.946	TRUE	14.37	690.618	C47H76O2	CE	HZUAPDDXDDVFOX-UHFFFAOYSA-N	O=C(OC1CC2=CCC3C(CCC4(C)C(CCC34)C(C)CCCC(C)C)C2(C)CC1)CCCCCCC=CCC=CCC=CCC=CCC	310	TRUE	TRUE	TRUE		FALSE	FALSE	null	null	100	100	62.7	68.8	100	6144.23	190628_TT1_Hclass_Aging_044_34_24M_SPF_F_Kidney_2_Pos	690.61847:532972 691.62182:475365 692.62518:118391	71.08487:432 77.03316:24 77.03809:84 79.05364:170 81.06869:900 83.08224:532 85.09977:334 91.05241:191 93.07051:262 95.08473:1001 97.10115:475 99.11219:24 103.05504:12 105.06896:399 107.0864:310 109.09958:1251 111.11375:596 113.12843:48 119.08502:501 121.09781:790 123.11502:635 125.12849:226 127.14721:95 131.08366:60 133.1011:897 135.11601:3024 137.12962:569 139.14655:221 144.089:24 145.09628:240 …	48.5108	396.55	37.6636	75.6779	324.927	88.8479	211.613	296.94	526.379	457.683	651.088	311.879	191.935	616.44	622.99	194.514	488.969	1226.05
3998	14.643	692.634	CE 20:3	[M+NH4]+		0.446	TRUE	14.58	692.634	C47H78O2	CE	ARRNWLFGLUXSFU-UHFFFAOYSA-N	O=C(OC1CC2=CCC3C(CCC4(C)C(CCC34)C(C)CCCC(C)C)C2(C)CC1)CCCCCCCCCC=CCC=CCC=CCC	310	TRUE	TRUE	TRUE		FALSE	FALSE	null	null	100	99.9	74.3	68.8	100	223.88	190628_TT1_Hclass_Aging_020_7_18M_SPF_M_Kidney_1_Pos	692.63342:4256 693.63677:3719 694.64013:1298	97.09893:24 135.12012:24 137.12392:10 147.10701:36 147.11552:60 151.1474:12 161.12784:36 163.145:36 189.15678:12 203.17477:36 207.21278:12 215.18356:36 229.19321:24 233.22568:24 243.20459:24 245.22855:12 259.24677:36 273.24622:12 287.27121:24 299.28305:10 369.35858:1369 370.38943:36 440.79199:12	2.24412	10.7409	1.64336	3.85771	5.57069	4.41741	8.17818	6.55812	12.3413	12.4029	18.333	8.86545	3.86247	16.9813	14.8504	7.24131	14.6013	28.2538
4036	8.656	698.556	HexCer 34:2;2O|HexCer 18:2;2O/16:0	[M+H]+	similar chromatogram in higher mz_4278; similar chromatogram in higher mz_4510; similar chromatogram in higher mz_4578	0.518	TRUE	9.03	698.557	C40H75NO8	HexCer_NS	VCLOTRNDBUPTQD-UHFFFAOYSA-N	O=C(NC(COC1OC(CO)C(O)C(O)C1O)C(O)C=CCCC=CCCCCCCCCC)CCCCCCCCCCCCCCC	310	TRUE	TRUE	TRUE		FALSE	FALSE	null	null	100	98.3	69.8	85.4	100	253.26	190628_TT1_Hclass_Aging_030_3_9w_SPF_M_Kidney_3_Pos	698.55548:4092 699.55883:3931 700.56219:1292	107.08137:12 189.16667:10 221.09006:24 250.24214:48 250.25546:106 256.26218:48 262.2515:775 280.24921:12 280.26566:86 311.30353:24 488.46512:12 488.47754:24 500.48706:105 502.50125:48 518.48236:197 680.54736:156	0.120914	7.42353	0.0970479	7.73244	0.323766	0.21841	0.21309	0.114269	7.82822	6.84907	6.39432	0.251356	0.156867	5.73883	0.224638	7.09351	6.42864	6.18843
4037	7.812	698.561	HexCer 34:2;2O|HexCer 18:2;2O/16:0	[M+H]+	ion correlated with 3897; adduct linked to 3897_[M+H-H2O]+	0.5	TRUE	9.03	698.557	C40H75NO8	HexCer_NS	VCLOTRNDBUPTQD-UHFFFAOYSA-N	O=C(NC(COC1OC(CO)C(O)C(O)C1O)C(O)C=CCCC=CCCCCCCCCC)CCCCCCCCCCCCCCC	410	TRUE	TRUE	TRUE		FALSE	FALSE	null	null	98.8	83.1	56.7	68.5	100	53.74	190628_TT1_Hclass_Aging_010_8_18M_SPF_M_Kidney_3_Pos	698.55151:1063 699.55486:1177 700.55822:382	81.05342:12 207.03046:12 262.24838:161 280.26715:24 487.13791:12 500.46744:24 518.48804:69 680.54309:48 680.57965:24	0.0147058	2.64269	0.0379093	1.79959	0.0917957	0.082087	0.0616376	0.0344184	2.09958	1.5817	1.5896	0.158321	0.0328914	1.23384	0.205104	2.36008	1.58137	1.06746
4056	9.213	700.573	HexCer 34:1;2O|HexCer 18:1;2O/16:0	[M+H]+	similar chromatogram in higher mz_7329; similar chromatogram in higher mz_7353	0.946	TRUE	9.21	700.572	C40H77NO8	HexCer_NS	VJLLLMIZEJJZTE-UHFFFAOYSA-N	O=C(NC(COC1OC(CO)C(O)C(O)C1O)C(O)C=CCCCCCCCCCCCCC)CCCCCCCCCCCCCCC	310	TRUE	TRUE	TRUE		FALSE	FALSE	null	null	100	100	69.5	83.8	100	203.21	190628_TT1_Hclass_Aging_046_22_24M_GF_M_Kidney_1_Pos	700.57434:8370 701.57769:7695 702.58105:2142	239.237:10 252.25331:12 252.26447:87 256.26273:24 264.26688:1215 282.27582:105 324.29306:12 468.08398:10 490.50439:48 502.46625:12 502.49771:110 504.50333:36 520.50635:234 682.56458:233	1.91339	10.0166	1.9546	8.34825	9.71546	2.33069	1.97593	1.67687	7.80598	8.87121	10.1269	2.51519	2.06836	7.30755	3.34725	7.60599	5.61297	11.1585
4057	8.088	700.573	HexCer 34:1;2O|HexCer 18:1;2O/16:0	[M+H]+	ion correlated with 3927; adduct linked to 3927_[M+H-H2O]+	0.5	TRUE	9.21	700.572	C40H77NO8	HexCer_NS	VJLLLMIZEJJZTE-UHFFFAOYSA-N	O=C(NC(COC1OC(CO)C(O)C(O)C1O)C(O)C=CCCCCCCCCCCCCC)CCCCCCCCCCCCCCC	410	TRUE	TRUE	TRUE		FALSE	FALSE	null	null	100	85.5	62	83.3	100	76.6	190628_TT1_Hclass_Aging_009_20_18M_GF_M_Kidney_3_Pos	700.57318:2915 701.57653:6066 702.57989:2978	184.07088:86 252.24947:12 252.26729:60 256.26111:24 264.26755:424 282.27661:60 490.522:12 502.49985:60 504.50232:24 520.47339:12 520.50543:129 641.34143:10 682.5459:36 682.57892:97	0.333332	3.69729	0.330569	2.20016	0.369664	0.417764	0.382153	0.311143	4.05316	2.72296	3.17057	0.406413	0.269456	2.02202	0.366956	3.59734	2.33256	2.15343
4089	14.536	704.633	SE 28:1/20:4	[M+NH4]+	similar chromatogram in higher mz_6908	0.714	TRUE	14.63	704.634	C48H78O2	CASE	KBQMZLDAGIUCLR-UHFFFAOYSA-N	O=C(OC1CC2=CCC3C(CCC4(C)C(CCC34)C(C)CCC(C)C(C)C)C2(C)CC1)CCCCCCC=CCC=CCC=CCC=CCC	310	TRUE	TRUE	TRUE		FALSE	FALSE	null	null	100	99.9	69.8	74.3	100	83.48	190628_TT1_Hclass_Aging_045_30_12M_SPF_F_Kidney_3_Pos	704.63361:1554 705.63696:1263 706.64032:458	135.11157:12 147.11678:24 161.13089:36 184.07286:12 275.27615:24 355.25842:10 383.33994:24 383.36465:209	0.341805	4.18357	0.475679	0.664318	2.69978	0.841836	2.29901	1.09302	2.23282	3.1356	3.43689	3.53912	0.734022	4.23349	7.13717	1.78011	2.78027	6.70237
4144	14.309	714.62	CE 22:6	[M+NH4]+	similar chromatogram in higher mz_4192; similar chromatogram in higher mz_4526	0.946	TRUE	14.21	714.618	C49H76O2	CE	VOEVEGPMRIYYKC-UHFFFAOYSA-N	O=C(OC1CC2=CCC3C(CCC4(C)C(CCC34)C(C)CCCC(C)C)C2(C)CC1)CCC=CCC=CCC=CCC=CCC=CCC=CCC	310	TRUE	TRUE	TRUE		FALSE	FALSE	null	null	99.6	99.9	59.6	68.3	100	1016.6	190628_TT1_Hclass_Aging_006_39_9w_GF_F_Kidney_3_Pos	714.61932:6129 715.62267:5105 716.62603:1654	71.08551:12 93.07131:12 105.06985:24 109.09757:36 121.10037:24 133.10059:12 135.11388:115 147.10728:12 147.11409:77 149.13605:48 151.15456:24 159.11285:12 161.12987:113 165.15874:24 175.14575:48 187.14954:12 189.15894:36 201.16391:12 215.1673:12 215.1776:60 229.19339:24 233.23013:36 243.20914:48 245.22868:12 257.22879:24 287.26892:24 369.34506:955 599.53589:24	13.3413	62.7046	9.90767	15.673	43.0043	18.2318	22.5073	37.0592	58.6057	65.8282	70.7968	36.8828	28.0932	89.8481	63.0544	30.5984	52.9793	125.803
4189	14.684	718.647	SE 29:1/20:4	[M+NH4]+		0.321	TRUE	14.73	718.65	C49H80O2	SISE	JARMGWMDQOCXQU-UHFFFAOYSA-N	O=C(OC1CC2=CCC3C(CCC4(C)C(CCC34)C(C)CCC(CC)C(C)C)C2(C)CC1)CCCCCCC=CCC=CCC=CCC=CCC	310	TRUE	TRUE	TRUE		FALSE	FALSE	null	null	100	100	51.3	74.5	100	76.44	190628_TT1_Hclass_Aging_047_1_9w_SPF_M_Kidney_1_Pos	718.65118:1031 719.65453:847 720.65789:424	77.03575:10 95.09039:12 109.09541:24 147.08261:12 147.11494:24 151.13817:10 161.13609:36 221.23701:10 257.22531:10 369.34885:12 397.37534:200 490.21301:12 681.24286:36	0.24851	1.74939	0.346561	0.432519	3.54149	0.490823	0.908124	0.421833	1.04242	1.31005	1.1659	1.38123	0.339646	1.8286	2.66473	0.943951	1.0723	2.48296
4243	13.052	727.563	CoQ8	[M+H]+		0.946	TRUE	12.49	727.566	C49H74O4	CoQ	ICFIZJQGJAJRSU-UHFFFAOYSA-N	O=C1C(OC)=C(OC)C(=O)C(=C1C)CC=C(C)CCC=C(C)CCC=C(C)CCC=C(C)CCC=C(C)CCC=C(C)CCC=C(C)CCC=C(C)C	410	TRUE	TRUE	TRUE		FALSE	FALSE	null	null	100	96.1	58.4	85	100	436.94	190628_TT1_Hclass_Aging_006_39_9w_GF_F_Kidney_3_Pos	727.56683:3136 728.57018:4136 729.57354:1170	121.096:12 135.11092:12 149.13124:36 191.17172:24 196.44193:24 197.07767:368 199.51593:10 209.0779:12 233.12352:12 237.11462:12 262.23828:12 262.25192:36 264.2645:36 269.22827:12 285.14261:24 313.28271:12 350.0932:10 367.267:10 531.50336:12 630.6178:24 695.51251:12 727.52686:24 727.55341:181	1.81607	1.25177	0.978771	0.880686	1.65504	0.879093	2.18969	2.68035	1.25246	1.83926	1.64385	1.90588	3.4448	2.0367	1.78543	2.01447	0.880213	0.591312
4262	14.447	728.633	SE 28:1/22:6	[M+NH4]+		0.518	TRUE	14.35	728.634	C50H78O2	CASE	HLNHTZIGDYMEEX-UHFFFAOYSA-N	O=C(OC1CC2=CCC3C(CCC4(C)C(CCC34)C(C)CCC(C)C(C)C)C2(C)CC1)CCC=CCC=CCC=CCC=CCC=CCC=CCC	310	TRUE	TRUE	TRUE		FALSE	FALSE	null	null	100	99.7	51.1	73.9	100	50.47	190628_TT1_Hclass_Aging_025_36_24M_SPF_F_Kidney_5_Pos	728.63324:993 729.63659:696 730.63995:429	80.04935:36 151.04289:10 203.17976:10 219.03224:10 287.26788:10 301.28568:24 383.35715:60 383.38464:24 455.32675:10	1.17435	1.72062	0.572237	1.04374	0.880134	1.47247	0.676873	1.09795	1.11476	1.04455	0.940019	1.12528	0.586734	1.23033	2.09807	0.908022	1.09156	1.72022
4353	11.754	738.624	TG 41:2;1O|TG 10:0_16:1_15:1;1O	[M+NH4]+		0.25	TRUE	12.78	738.624	C44H80O7	OxTG	SURKISMYZRHVQH-UHFFFAOYSA-N	O=C(OCC(OC(=O)CCCCCCCC=CCCCCCC)COC(=O)CCCCCCC(O)C=CCCCCC)CCCCCCCCC	410	TRUE	TRUE	TRUE		FALSE	FALSE	null	null	100	87.6	70.9	61.7	100	34.61	190628_TT1_Hclass_Aging_039_41_12M_GF_F_Kidney_2_Pos	738.62384:3043 739.62719:2074 740.63055:931	95.07685:12 149.02066:12 155.10408:36 239.2334:24 439.33978:36 458.15717:10 465.35742:122 467.37555:123 493.39429:48 549.47504:72 577.52875:24 738.64807:24	0.0267196	0.592759	0.020269	0.124514	4.19571	2.09521	0.601596	0.093009	1.10759	0.274037	0.458722	3.21714	0.162109	0.139595	5.34138	0.461734	2.70018	4.1513
4356	13.587	738.663	TG 42:1|TG 8:0_16:0_18:1	[M+NH4]+	similar chromatogram in higher mz_6805	0.946	TRUE	13.56	738.661	C45H84O6	TG	GOKZYHOGUBGXBC-UHFFFAOYSA-N	O=C(OCC(OC(=O)CCCCCCCCCCCCCCC)COC(=O)CCCCCCCC=CCCCCCCCC)CCCCCCC	310	TRUE	TRUE	TRUE		FALSE	FALSE	null	null	100	100	55	93.8	100	147.34	190628_TT1_Hclass_Aging_006_39_9w_GF_F_Kidney_3_Pos	738.66266:14514 739.66601:13898 740.66937:4084	71.08434:36 79.05436:12 83.0817:48 93.07404:12 109.09759:12 111.11471:36 127.10399:24 127.10874:48 135.11716:48 143.81412:10 155.13792:24 165.16238:24 219.21211:24 239.23633:36 265.24112:12 265.25027:60 286.70563:10 326.3475:10 381.31668:10 409.31973:36 437.31079:12 437.35483:369 439.36722:622 465.3887:673 467.40384:107 493.38596:12 493.41711:82 495.43579:36 521.44128:24 537.46466:10 549.47278:13…	0.234863	2.5988	0.158182	2.35432	16.8964	21.5215	1.73564	0.293405	3.91325	1.00511	1.44552	12.311	0.824441	1.0311	23.6949	1.9418	15.9913	9.81373
4542	11.33	756.635	HexCer 38:1;2O|HexCer 18:1;2O/20:0	[M+H]+		0.018	TRUE	11.38	756.635	C44H85NO8	HexCer_NS	DFELABABMXOKTD-UHFFFAOYSA-N	O=C(NC(COC1OC(CO)C(O)C(O)C1O)C(O)C=CCCCCCCCCCCCCC)CCCCCCCCCCCCCCCCCCC	310	TRUE	TRUE	TRUE		FALSE	FALSE	null	null	100	100	46.3	81.6	100	92.82	190628_TT1_Hclass_Aging_005_33_18M_SPF_F_Kidney_3_Pos	756.63507:1875 757.63842:1288 758.64178:594	135.073:10 247.23434:10 252.26578:36 264.26596:363 270.23221:10 282.27725:48 295.86996:10 312.33624:24 483.35422:12 546.55206:24 558.53467:24 558.56116:36 560.57593:24 576.53821:12 576.56519:60 576.58875:48 607.56378:36 615.55518:48 736.3811:10 738.62555:95 756.5766:24	0.862741	0.756827	0.788514	0.681571	2.32591	1.39108	0.641031	0.726917	0.86764	0.788618	1.16417	1.15558	1.01963	0.70669	1.45527	0.772873	0.804385	1.06319
4608	13.441	762.659	TG 44:3|TG 10:0_16:1_18:2	[M+NH4]+		0.643	TRUE	13.49	762.661	C47H84O6	TG	KJQIRSNKCUYVNX-UHFFFAOYSA-N	O=C(OCC(OC(=O)CCCCCCCC=CCCCCCC)COC(=O)CCCCCCCCC)CCCCCCCC=CCC=CCCCCC	310	TRUE	TRUE	TRUE		FALSE	FALSE	null	null	100	100	57.3	87.6	100	83.46	190628_TT1_Hclass_Aging_036_21_18M_GF_M_Kidney_5_Pos	762.6604:1580 763.66375:1133 764.66711:640	165.16508:10 184.07088:24 433.10281:10 463.3642:60 465.39008:114 465.40826:109 491.41022:74 517.44208:12 519.43567:24 545.47217:24 573.48187:60 573.52893:12 575.52338:24 601.51471:48 762.64685:24	0.0644413	1.83769	0.0737626	0.941595	4.34828	2.99973	0.810771	0.162653	2.69724	0.529865	0.772057	3.17014	0.184496	0.648798	4.09558	1.64559	8.08334	17.0828
4621	8.039	764.527	BMP 34:2|BMP 16:1_18:1	[M+NH4]+		0.321	TRUE	8.2	764.544	C40H75O10P	BMP	HFMNWSMOJFRNIN-UHFFFAOYSA-N	O=C(OC(CO)COP(=O)(O)OCC(OC(=O)CCCCCCCC=CCCCCCCCC)CO)CCCCCCCC=CCCCCCC	310	TRUE	TRUE	TRUE		FALSE	FALSE	null	null	100	99.6	40.4	81	100	122.45	190628_TT1_Hclass_Aging_024_10_24M_SPF_M_Kidney_3_Pos	764.5434:3109 765.54675:2195 766.55011:2297	86.09607:10 131.07506:10 184.06429:12 184.0719:48 311.25183:231 313.27264:36 337.26675:36 339.29007:165 364.26675:36 371.92566:10 399.25705:12 400.2558:24 575.49982:60 623.45752:12 623.49255:63 623.52057:78 746.53217:24 764.50476:24	1.68872	3.79371	1.75573	2.4922	1.19687	1.52076	2.42302	2.29339	2.67387	2.23177	2.33123	1.90318	1.84535	1.847	1.88486	2.87565	2.29408	1.39861
4631	13.62	764.676	TG 44:2|TG 10:0_16:0_18:2	[M+NH4]+		0.946	TRUE	13.59	764.676	C47H86O6	TG	NYEYZZJCSHLJCF-UHFFFAOYSA-N	O=C(OCC(OC(=O)CCCCCCCCCCCCCCC)COC(=O)CCCCCCCCC)CCCCCCCC=CCC=CCCCCC	310	TRUE	TRUE	TRUE		FALSE	FALSE	null	null	100	100	40.5	95.9	100	248.38	190628_TT1_Hclass_Aging_004_14_9w_GF_M_Kidney_2_Pos	764.67664:5736 765.67999:4241 766.68335:1932	79.0533:12 81.06835:24 93.06883:12 109.10368:24 119.08322:10 137.13104:24 155.14346:36 183.16521:12 237.22258:24 245.22475:36 263.22754:12 263.2298:36 274.96359:10 295.27487:10 311.25427:24 437.36423:12 465.36511:48 465.38025:114 467.4075:197 491.37524:12 491.41257:217 493.41467:89 519.4317:77 521.42273:12 521.44519:48 521.46442:36 523.46252:24 547.42957:12 547.4657:48 547.47882:60 549.47681:36 5…	0.339495	5.54845	0.209377	3.86061	20.0687	16.7261	3.10133	0.423258	9.72974	1.7471	3.83355	13.1868	0.947953	2.16213	23.3885	5.37916	28.5359	33.028
4674	14.093	768.707	TG 44:0|TG 14:0_14:0_16:0	[M+NH4]+		0.446	TRUE	13.99	768.708	C47H90O6	TG	AMXRERGJDVUTMF-UHFFFAOYSA-N	O=C(OCC(OC(=O)CCCCCCCCCCCCC)COC(=O)CCCCCCCCCCCCCCC)CCCCCCCCCCCCC	310	TRUE	TRUE	TRUE		FALSE	FALSE	null	null	100	99.9	71.9	89.5	100	192.35	190628_TT1_Hclass_Aging_030_3_9w_SPF_M_Kidney_3_Pos	768.70654:8731 769.70989:7963 770.71325:2604	71.08529:36 81.06792:24 83.0917:24 95.0826:24 109.0959:12 121.06158:12 135.11206:10 141.16084:10 151.06989:24 175.13448:10 183.17043:24 211.19682:24 211.20702:60 239.2319:60 313.27466:24 341.29297:12 439.3822:10 467.38901:24 495.27377:12 495.44241:807 496.44235:24 523.4751:857 541.23547:10 551.50458:219 579.5047:12 627.5307:24 768.70312:24	0.692463	3.3882	0.449053	3.48908	9.24545	12.9301	1.8627	0.555358	3.61133	1.50857	2.3262	8.57476	0.897004	1.63945	15.5308	2.70168	13.4768	7.9552
4860	11.546	782.649	HexCer 40:2;2O|HexCer 18:2;2O/22:0	[M+H]+	similar chromatogram in higher mz_7135	0.054	TRUE	11.67	782.65	C46H87NO8	HexCer_NS	LWOBEIHJFQUNNQ-UHFFFAOYSA-N	O=C(NC(COC1OC(CO)C(O)C(O)C1O)C(O)C=CCCC=CCCCCCCCCC)CCCCCCCCCCCCCCCCCCCCC	310	TRUE	TRUE	TRUE		FALSE	FALSE	null	null	100	99.8	42.4	67.4	100	52.36	190628_TT1_Hclass_Aging_014_11_24M_SPF_M_Kidney_4_Pos	782.65198:1019 783.65533:841 784.65869:446	122.55514:10 184.06882:48 224.9277:10 250.25208:24 262.23669:24 262.24805:139 572.60327:10 584.57147:24 602.58704:60 641.60828:24 764.59967:12 764.63843:48 782.35931:24 782.56732:24	0.326796	1.67701	0.324504	1.5724	1.05689	0.709467	0.486057	0.295999	1.34595	1.58914	1.58097	0.796504	0.36054	1.29751	1.04785	1.62204	1.39599	1.45886
4889	12.805	784.664	HexCer 40:1;2O|HexCer 18:1;2O/22:0	[M+H]+	adduct linked to 5232_[M+Na]+; similar chromatogram in higher mz_7266	0.946	TRUE	12.4	784.666	C46H89NO8	HexCer_NS	YIGARKIIFOHVPF-UHFFFAOYSA-N	O=C(NC(COC1OC(CO)C(O)C(O)C1O)C(O)C=CCCCCCCCCCCCCC)CCCCCCCCCCCCCCCCCCCCC	310	TRUE	TRUE	TRUE		FALSE	FALSE	null	null	100	98	47.8	87.7	100	229.39	190628_TT1_Hclass_Aging_048_40_12M_GF_F_Kidney_1_Pos	784.66718:5354 785.67053:5669 786.67389:1933	184.07475:48 252.26714:48 264.26736:630 282.25748:12 282.28104:60 332.29434:12 340.36667:48 431.39606:10 467.36261:36 481.37134:10 557.24396:10 574.591:48 577.5108:24 586.59674:147 588.58313:36 588.60358:60 599.49597:24 604.60529:163 643.58728:12 766.64673:146 766.66223:152 784.62646:24	5.51631	6.84246	5.47259	8.75679	18.7759	7.76162	6.96681	5.75063	7.06626	8.20162	8.82902	7.7349	6.9755	6.69127	8.55439	7.09019	7.03958	8.49415
4907	7.719	786.53	BMP 36:5|BMP 18:2_18:3	[M+NH4]+		0.196	TRUE	7.97	786.528	C42H73O10P	BMP	CTYAWWDDCBDQDB-UHFFFAOYSA-N	O=C(OC(CO)COP(=O)(O)OCC(OC(=O)CCCCCCCC=CCC=CCCCCC)CO)CCCCCCCC=CCC=CCC=CCC	310	TRUE	TRUE	TRUE		FALSE	FALSE	null	null	100	99.2	66.1	87.4	100	56.33	190628_TT1_Hclass_Aging_024_10_24M_SPF_M_Kidney_3_Pos	786.53046:2801 787.53381:1928 788.53717:1760	176.28983:10 184.06247:36 184.07579:76 251.18892:10 335.25476:303 337.27463:286 597.48853:24 601.51849:48 604.17822:10 627.47937:24 786.53156:24	0.799049	1.82978	0.648445	1.26641	0.712684	0.78558	1.29818	0.813514	1.58358	1.16778	1.25822	1.01972	0.76087	1.30401	1.30176	1.30133	0.910942	1.12214
4939	7.89	788.544	BMP 36:4|BMP 18:2_18:2	[M+NH4]+		0.161	TRUE	7.94	788.544	C42H75O10P	BMP	PDZPSKRWTVEJHS-UHFFFAOYSA-N	O=C(OC(CO)COP(=O)(O)OCC(OC(=O)CCCCCCCC=CCC=CCCCCC)CO)CCCCCCCC=CCC=CCCCCC	310	TRUE	TRUE	TRUE		FALSE	FALSE	null	null	100	100	57.8	73.3	100	294.19	190628_TT1_Hclass_Aging_024_10_24M_SPF_M_Kidney_3_Pos	788.54431:18674 789.54766:14660 790.55102:5408	81.07062:48 83.08421:24 91.05587:12 95.08555:48 109.09762:36 111.07925:24 119.08917:12 123.1146:36 131.0881:12 133.10237:48 135.1124:24 137.13586:36 143.08154:12 159.11842:24 161.14973:12 175.1461:24 181.12567:10 184.07217:235 189.16515:24 215.18842:12 227.17825:10 257.2363:10 263.23694:70 266.99066:24 281.03735:12 281.06088:36 285.01257:36 308.03012:10 311.24982:24 327.06631:10 335.25769:211 337…	3.96991	9.65868	3.15785	6.34878	3.69399	3.90618	8.36913	3.97811	8.81922	5.3161	6.28221	5.10685	4.43735	4.82409	3.36389	6.37823	4.39221	7.64844
4947	13.562	788.672	TG 46:4|TG 10:0_16:0_20:4	[M+NH4]+		0.411	TRUE	13.58	788.676	C49H86O6	TG	FAIWGJJNFUDOAY-UHFFFAOYSA-N	O=C(OCC(OC(=O)CCCCCCCCCCCCCCC)COC(=O)CCCCCCCCC)CCCCCCC=CCC=CCC=CCC=CCC	310	TRUE	TRUE	TRUE		FALSE	FALSE	null	null	100	100	51.8	81	100	46.52	190628_TT1_Hclass_Aging_003_27_9w_SPF_F_Kidney_3_Pos	788.67719:744 789.68054:626 790.6839:461	111.08683:10 149.13123:12 150.05283:10 175.13684:12 205.96703:10 229.1705:12 249.88084:10 269.21902:12 271.2558:10 297.22641:10 367.27771:10 467.37741:12 467.39258:48 478.92972:10 515.37531:12 575.45221:10 577.48706:12 599.50616:48 753.2016:10 771.63965:12 788.66058:24	0.192201	1.93955	0.155466	1.03919	3.01608	1.96176	1.00352	0.297449	2.62218	0.687368	1.20906	2.57414	0.309551	1.06362	2.97819	2.0115	6.36348	19.2453
4965	8.113	790.56	BMP 36:3|BMP 18:1_18:2	[M+NH4]+	adduct linked to 4724_[M+H]+	0.357	TRUE	8.12	790.559	C42H77O10P	BMP	ORHQIMMGYUCYFD-UHFFFAOYSA-N	O=C(OC(CO)COP(=O)(O)OCC(OC(=O)CCCCCCCC=CCCCCCCCC)CO)CCCCCCCC=CCC=CCCCCC	310	TRUE	TRUE	TRUE		FALSE	FALSE	null	null	100	100	70.3	87	100	363.74	190628_TT1_Hclass_Aging_044_34_24M_SPF_F_Kidney_2_Pos	790.55975:24414 791.5631:19584 792.56646:6476	71.08288:12 81.06533:24 83.08779:24 93.06965:12 95.0866:48 97.10305:36 105.06951:24 107.08261:24 121.09382:12 123.11878:48 135.11346:48 149.13219:24 161.1312:48 175.13969:12 177.16589:10 184.0751:71 203.14046:12 245.2149:12 245.24127:12 247.23836:48 253.19109:10 263.22415:24 263.2287:36 265.25186:48 313.26639:12 331.17554:10 337.27307:1707 338.27881:24 339.29123:2285 365.31036:24 376.1738:10 383.…	4.15505	12.4007	3.52758	5.93301	5.82738	4.43019	12.4589	5.54745	11.276	7.55854	8.83606	7.59626	5.73336	9.8221	13.1453	8.41222	6.55629	9.54469
4977	13.657	790.686	TG 46:3|TG 12:0_16:1_18:2	[M+NH4]+	similar chromatogram in higher mz_7178; similar chromatogram in higher mz_5857	0.946	TRUE	13.64	790.692	C49H88O6	TG	YCZHBUHPOJGNKX-UHFFFAOYSA-N	O=C(OCC(OC(=O)CCCCCCCC=CCCCCCC)COC(=O)CCCCCCCCCCC)CCCCCCCC=CCC=CCCCCC	310	TRUE	TRUE	TRUE		FALSE	FALSE	null	null	100	100	51.4	94.9	100	156.11	190628_TT1_Hclass_Aging_020_7_18M_SPF_M_Kidney_1_Pos	790.69397:8861 791.69732:9301 792.70068:5435	81.06657:36 83.08266:48 95.08387:36 135.11682:36 149.13232:24 155.14108:36 161.13492:12 183.16457:12 183.16837:36 205.16966:10 219.20558:12 222.12161:10 237.22192:36 245.23508:12 261.22504:24 263.22913:24 265.24316:12 265.25687:36 296.76132:10 311.25854:36 339.29187:24 473.41132:10 489.87344:24 491.40573:299 493.41403:310 493.4234:494 517.38959:12 517.42468:48 519.44708:422 521.4574:24 545.45435:…	0.313225	8.55751	0.217318	4.01675	19.4008	9.51669	4.18697	0.501889	14.5988	2.29335	6.2291	12.311	0.783142	3.39786	19.6196	9.57252	36.7603	66.716
5001	8.366	792.576	BMP 36:2|BMP 18:1_18:1	[M+NH4]+		0.321	TRUE	8.54	792.575	C42H79O10P	BMP	ZCXRIDHJRROVJY-UHFFFAOYSA-N	O=C(OC(CO)COP(=O)(O)OCC(OC(=O)CCCCCCCC=CCCCCCCCC)CO)CCCCCCCC=CCCCCCCCC	310	TRUE	TRUE	TRUE		FALSE	FALSE	null	null	100	99.6	61	74.8	100	172.67	190628_TT1_Hclass_Aging_015_31_18M_SPF_F_Kidney_1_Pos	792.57275:5934 793.5761:5498 794.57946:2059	79.05211:12 95.08451:24 149.13316:12 149.14001:24 177.09421:12 184.07059:78 247.24213:24 265.24442:36 337.2623:12 337.27002:24 339.28818:1398 341.29678:36 354.27545:12 383.25232:24 475.29877:24 507.38028:12 549.57367:10 603.52014:82 606.55396:24 651.50476:12 651.54059:48 739.48767:12 792.53668:60 792.57227:36	1.55814	5.50142	1.14995	2.11586	2.14272	1.73975	4.56221	2.15544	6.49909	4.4713	3.93941	2.74914	1.96058	5.93042	5.15664	4.56651	3.85501	4.61134
5006	13.867	792.706	TG 46:2|TG 12:0_16:0_18:2	[M+NH4]+		0.946	TRUE	13.82	792.708	C49H90O6	TG	JORMHQSOEAESEA-UHFFFAOYSA-N	O=C(OCC(OC(=O)CCCCCCCCCCCCCCC)COC(=O)CCCCCCCCCCC)CCCCCCCC=CCC=CCCCCC	310	TRUE	TRUE	TRUE		FALSE	FALSE	null	null	100	100	48.1	96.1	100	625.38	190628_TT1_Hclass_Aging_047_1_9w_SPF_M_Kidney_1_Pos	792.70752:18331 793.71087:18638 794.71423:8022	71.08386:36 81.06258:12 81.0689:36 95.07542:12 95.08226:36 109.0955:24 109.0999:36 111.11555:24 121.10436:12 135.11807:36 147.11678:12 149.13702:24 153.12859:24 163.15344:12 183.17351:36 184.07097:48 207.16765:12 209.19017:24 219.21529:24 235.20695:24 237.22981:24 239.23747:48 245.2299:36 255.21309:10 257.19852:24 257.25702:12 263.23514:100 283.22018:12 285.24991:36 313.25851:12 313.27588:87 337.…	1.34788	27.5753	0.832911	15.6464	88.6682	52.9542	15.2283	1.54566	45.0057	7.83964	21.6176	47.1441	2.98281	9.15615	102.998	27.9015	150.691	126.693
5047	14.117	794.727	TG 46:1|TG 14:0_16:0_16:1	[M+NH4]+	adduct linked to 5687_[M+ACN+Na]+; adduct linked to 5129_[M+Na]+; similar chromatogram in higher mz_5129	0.964	TRUE	14.02	794.723	C49H92O6	TG	JYICXCHHKWVGEI-UHFFFAOYSA-N	O=C(OCC(OC(=O)CCCCCCCCCCCCCCC)COC(=O)CCCCCCCCCCCCC)CCCCCCCC=CCCCCCC	310	TRUE	TRUE	TRUE		FALSE	FALSE	null	null	100	99.9	76.9	94.5	100	1686.57	190628_TT1_Hclass_Aging_017_18_12M_GF_M_Kidney_3_Pos	794.72357:53706 795.72692:45958 796.73028:13531	71.08292:99 79.05661:24 81.06918:109 83.08786:60 85.09641:36 95.07985:36 95.08395:149 97.099:86 99.11281:24 109.09588:12 109.09881:85 111.1115:24 121.09397:12 123.11116:48 135.11365:86 137.12726:60 141.15913:12 149.13583:48 151.144:48 158.99939:10 165.16216:36 183.16846:36 193.1805:12 209.18684:36 211.20694:259 219.21191:70 224.09392:12 229.21236:24 237.21336:144 239.23833:153 256.26416:24 257.86…	2.95532	35.7268	1.69529	27.8258	131.502	126.748	20.6954	2.75298	53.6229	13.1574	29.2304	84.1455	6.46198	13.4241	183.377	30.9275	184.734	100.682
5060	13.436	795.63	CoQ9	[M+H]+	adduct linked to 4779_[M+H-H2O]+; adduct linked to 5431_[M+Na]+; found in higher mz's MsMs_5763	0.946	TRUE	13.6	795.629	C54H82O4	CoQ	UUGXJSBPSRROMU-UHFFFAOYSA-N	O=C1C(OC)=C(OC)C(=O)C(=C1C)CC=C(C)CCC=C(C)CCC=C(C)CCC=C(C)CCC=C(C)CCC=C(C)CCC=C(C)CCC=C(C)CCC=C(C)C	310	TRUE	TRUE	TRUE		FALSE	FALSE	null	null	100	99.7	69.4	86.5	100	7639.54	190628_TT1_Hclass_Aging_013_45_18M_GF_F_Kidney_3_Pos	795.62982:246927 796.63317:313870 797.63653:111754	71.08345:24 77.0391:48 79.05468:120 80.06595:36 81.06976:1031 83.04752:48 83.08461:126 91.04825:12 91.05092:95 93.06766:344 95.08597:1032 97.09827:204 105.06745:157 107.08343:421 109.06142:36 109.10098:1106 111.04272:36 111.11518:91 115.04829:36 119.08655:280 121.09937:677 123.11505:964 125.13323:66 129.07053:60 131.08534:169 133.09958:462 135.11612:1364 136.05232:99 137.0591:94 137.12975:672 139…	44.7029	31.4427	34.6877	25.6132	29.521	18.6622	36.2835	48.7497	34.111	43.2987	45.7417	28.2556	67.6971	43.6265	32.2152	45.2607	18.646	10.9687
5080	14.429	796.742	TG 46:0|TG 14:0_16:0_16:0	[M+NH4]+	adduct linked to 5722_[M+ACN+Na]+	1	TRUE	14.28	796.739	C49H94O6	TG	JWVXCFSNEOMSHH-UHFFFAOYSA-N	O=C(OCC(OC(=O)CCCCCCCCCCCCCCC)COC(=O)CCCCCCCCCCCCCCC)CCCCCCCCCCCCC	310	TRUE	TRUE	TRUE		FALSE	FALSE	null	null	100	99.8	89	89.9	100	393.42	190628_TT1_Hclass_Aging_013_45_18M_GF_F_Kidney_3_Pos	796.73932:8399 797.74267:8620 798.74603:3006	95.08337:12 109.09821:12 184.07101:10 211.20634:85 221.21445:12 228.22714:12 239.23776:48 417.15771:12 437.18143:24 495.42947:36 502.78046:10 523.4715:1731 524.48645:24 537.47778:24 551.46466:12 551.50415:1642 569.04688:10 796.74304:60	2.84372	7.84168	1.73499	7.24133	16.4814	19.1164	4.59581	1.71909	8.99247	4.2808	8.03558	16.1135	3.2418	4.54159	27.8265	8.62485	25.1478	27.3048
5116	12.99	798.681	HexCer 41:1;2O|HexCer 18:1;2O/23:0	[M+H]+	adduct linked to 4826_[M+H-H2O]+	0.946	TRUE	12.87	798.682	C47H91NO8	HexCer_NS	SJGWLQDELUWRDA-UHFFFAOYSA-N	O=C(NC(COC1OC(CO)C(O)C(O)C1O)C(O)C=CCCCCCCCCCCCCC)CCCCCCCCCCCCCCCCCCCCCC	310	TRUE	TRUE	TRUE		FALSE	FALSE	null	null	100	99.8	54.2	84.4	100	86.42	190628_TT1_Hclass_Aging_024_10_24M_SPF_M_Kidney_3_Pos	798.68188:3549 799.68523:3749 800.68859:1246	135.11053:12 151.14073:10 181.08759:12 184.06615:24 197.07536:24 250.25337:60 252.27072:48 264.27106:716 265.27112:24 266.97873:10 268.2619:24 278.28204:24 282.28494:60 346.13461:10 354.36182:24 588.61401:36 600.60992:131 602.59918:24 613.51904:24 618.6178:242 780.651:287 798.65851:70	2.19117	3.28372	2.21239	3.70081	7.78651	2.7206	2.76313	2.25785	2.45136	4.1142	3.25968	3.23172	2.40487	4.33691	4.09232	2.96544	3.32393	3.17961
5201	13.774	804.706	TG 47:3|TG 16:0_16:1_15:2	[M+NH4]+	ion correlated with 4796; ion correlated with 5621	0.161	TRUE	13.77	804.708	C50H90O6	TG	MKBWWXYXQIWBPA-UHFFFAOYSA-N	O=C(OCC(OC(=O)CCCCCCCC=CCCCCCC)COC(=O)CCCCCCCCCCCCCCC)CCCCCCC=CCC=CCCC	310	TRUE	TRUE	TRUE		FALSE	FALSE	null	null	100	100	35.5	88.5	100	61.03	190628_TT1_Hclass_Aging_030_3_9w_SPF_M_Kidney_3_Pos	804.70642:1689 805.70977:1988 806.71313:824	115.10966:10 137.12608:12 139.09998:10 159.13091:10 193.20068:10 203.15955:12 221.19704:36 232.13708:10 237.2207:24 250.2561:10 278.92432:10 311.23999:12 311.25235:24 313.27567:48 339.27771:12 380.35965:10 417.17105:24 475.36911:12 493.43152:10 505.42258:48 519.44586:12 520.43774:12 522.45959:36 531.43329:48 533.46661:60 540.56171:10 549.48163:115 559.43994:12 559.46649:36 573.48608:12 748.6087:1…	0.0404161	0.745546	0.0397022	0.568726	0.989853	0.4745	0.296476	0.0678472	0.800665	0.428809	0.445353	0.713496	0.0798967	0.588519	0.887601	0.831509	2.36653	4.31631
5236	14.012	806.723	TG 47:2|TG 16:0_16:0_15:2	[M+NH4]+	similar chromatogram in higher mz_7036	0.679	TRUE	13.99	806.723	C50H92O6	TG	QZXBBNOMTWDEOU-UHFFFAOYSA-N	O=C(OCC(OC(=O)CCCCCCCCCCCCCCC)COC(=O)CCCCCCCCCCCCCCC)CCCCCCC=CCC=CCCC	310	TRUE	TRUE	TRUE		FALSE	FALSE	null	null	100	100	42.5	89.4	100	46.92	190628_TT1_Hclass_Aging_030_3_9w_SPF_M_Kidney_3_Pos	806.72333:3855 807.72668:3437 808.73004:1387	81.06921:12 85.10032:24 109.09299:12 109.10032:36 123.11122:12 153.12747:10 161.12798:36 175.15125:24 184.06412:12 184.06792:60 203.17294:12 203.18494:48 221.17552:24 221.19221:60 239.22763:12 239.23631:24 311.26135:10 313.27225:90 505.44632:12 507.45148:36 509.46063:60 521.44501:36 523.46881:24 533.45856:174 535.47302:110 535.50226:24 547.44257:12 547.4754:69 549.47998:36 551.48163:106 551.5047:…	0.112716	2.214	0.105315	1.39388	3.49612	1.38643	0.930053	0.220166	2.33861	1.44848	1.30514	2.12981	0.209198	2.2581	2.54115	2.51776	5.29373	9.52714
5264	11.521	808.663	HexCer 42:3;2O|HexCer 18:2;2O/24:1	[M+H]+		0.321	TRUE	11.76	808.666	C48H89NO8	HexCer_NS	RSVRQAWRXRXVEA-UHFFFAOYSA-N	O=C(NC(COC1OC(CO)C(O)C(O)C1O)C(O)C=CCCC=CCCCCCCCCC)CCCCCCCCCCCC=CCCCCCCCCCC	310	TRUE	TRUE	TRUE		FALSE	FALSE	null	null	100	99.3	56.6	81.3	100	61.37	190628_TT1_Hclass_Aging_047_1_9w_SPF_M_Kidney_1_Pos	808.66919:1785 809.67254:1513 810.6759:955	184.06554:12 184.07314:48 227.11148:10 250.2458:24 262.25522:397 280.25537:24 598.56995:12 610.57617:24 610.58313:48 612.62006:24 624.49921:12 628.55933:12 628.59802:87 658.50732:10 749.56824:24 773.65356:10 790.60577:24 790.6413:60 801.32599:12 808.63525:24	0.454246	3.21135	0.436715	2.30578	1.09162	0.68015	0.732607	0.437803	2.84347	3.10686	3.94956	1.07071	0.492106	2.82803	1.01296	3.54427	3.29492	3.6251
5266	11.586	808.668	HexCer 42:3;2O|HexCer 18:2;2O/24:1	[M+H]+		0.161	TRUE	11.76	808.666	C48H89NO8	HexCer_NS	RSVRQAWRXRXVEA-UHFFFAOYSA-N	O=C(NC(COC1OC(CO)C(O)C(O)C1O)C(O)C=CCCC=CCCCCCCCCC)CCCCCCCCCCCC=CCCCCCCCCCC	310	TRUE	TRUE	TRUE		FALSE	FALSE	null	null	100	99.5	40.9	77.8	100	59.5	190628_TT1_Hclass_Aging_026_2_9w_SPF_M_Kidney_2_Pos	808.66742:1818 809.67077:1692 810.67413:1000	184.05887:12 184.0703:141 185.07111:36 221.08009:10 250.24712:48 262.23163:12 262.25208:266 264.26465:24 280.26392:36 594.5531:12 598.59039:24 610.5553:24 610.59344:106 612.61304:24 623.5072:24 628.56281:12 628.59094:93 657.57513:10 761.3623:10 790.62598:91 790.66937:88 790.71277:24 808.58789:36 808.69562:24	0.522873	2.93632	0.488272	2.24201	1.95996	0.712398	0.743174	0.472221	2.84347	3.09793	3.70092	0.976044	0.646442	2.79365	1.0604	3.58905	3.17724	3.64503
5268	14.279	808.737	TG 47:1|TG 15:0_16:0_16:1	[M+NH4]+		0.893	TRUE	14.21	808.739	C50H94O6	TG	RCYIETYFTUBXFK-UHFFFAOYSA-N	O=C(OCC(OC(=O)CCCCCCCCCCCCCCC)COC(=O)CCCCCCCCCCCCCC)CCCCCCCC=CCCCCCC	310	TRUE	TRUE	TRUE		FALSE	FALSE	null	null	100	99.9	55.2	93.8	100	70.28	190628_TT1_Hclass_Aging_016_6_12M_SPF_M_Kidney_3_Pos	808.73804:2987 809.74139:2370 810.74475:978	85.10198:10 133.09616:12 150.60355:10 184.0668:12 205.19289:10 237.20158:12 267.01175:10 355.26956:10 443.21915:10 509.42487:12 509.44388:60 521.45374:36 535.4364:24 535.46564:138 537.48389:118 545.92926:10 549.47913:136 551.48077:12 563.47375:12 563.50037:95 563.57031:12 565.5174:24 581.35657:10 591.53351:12 666.28021:10 791.7207:10 808.75299:48	0.197365	2.37669	0.157346	1.05871	4.07663	1.95731	1.16084	0.319466	2.22351	1.96833	1.3252	2.85825	0.342359	3.00367	3.08858	2.89141	5.70993	10.0569
5305	12.837	810.683	HexCer 42:2;2O|HexCer 18:2;2O/24:0	[M+H]+		0.946	TRUE	12.69	810.682	C48H91NO8	HexCer_NS	RVHBZEQSKCGIES-UHFFFAOYSA-N	O=C(NC(COC1OC(CO)C(O)C(O)C1O)C(O)C=CCCC=CCCCCCCCCC)CCCCCCCCCCCCCCCCCCCCCCC	310	TRUE	TRUE	TRUE		FALSE	FALSE	null	null	100	99.6	50.1	87	100	333.2	190628_TT1_Hclass_Aging_026_2_9w_SPF_M_Kidney_2_Pos	810.68311:15079 811.68646:13497 812.68982:8881	168.05682:10 184.06641:235 239.23032:10 250.23592:12 250.25368:125 255.02644:10 262.24969:1435 280.26147:248 283.53378:10 368.39755:67 411.41296:10 442.30875:24 493.40308:24 600.61731:93 603.5473:12 612.60931:254 614.60443:48 630.62219:700 648.64587:36 751.64417:12 789.59619:12 789.66327:24 792.67072:830 810.59576:48 810.67169:60	2.866	21.8529	3.07369	22.1072	14.5881	3.6602	5.58085	3.23258	15.8428	19.3211	19.3698	6.13537	3.47257	14.8456	6.39173	23.5229	22.1714	17.7469
5307	14.596	810.75	TG 47:0|TG 14:0_16:0_17:0	[M+NH4]+		0.375	TRUE	14.39	810.755	C50H96O6	TG	LVVDEVHUTIMHAK-UHFFFAOYSA-N	O=C(OCC(OC(=O)CCCCCCCCCCCCCCC)COC(=O)CCCCCCCCCCCCCCCC)CCCCCCCCCCCCC	310	TRUE	TRUE	TRUE		FALSE	FALSE	null	null	100	99.4	55.5	84.4	100	39.62	190628_TT1_Hclass_Aging_013_45_18M_GF_F_Kidney_3_Pos	810.74738:586 811.75073:484 812.75409:171	184.07326:24 212.03549:5 509.44519:6 509.45786:12 523.46924:24 535.75281:12 537.48853:116 549.72064:6 551.50189:44 565.49878:18 565.51208:18 810.60333:12 810.77515:12	0.171095	0.814867	0.133316	0.380945	1.07358	0.670231	0.439096	0.233197	0.819013	0.71195	0.652572	1.02325	0.226181	0.902607	1.26607	0.819893	1.6889	4.8287
5450	11.75	818.671	HexCer 40:0;4O|HexCer 18:0;3O/22:0;(2OH)	[M+H]+	similar chromatogram in higher mz_5815	0.732	TRUE	11.89	818.672	C46H91NO10	HexCer_AP	YTAGQSULOHKBPZ-UHFFFAOYSA-N	O=C(NC(COC1OC(CO)C(O)C(O)C1O)C(O)C(O)CCCCCCCCCCCCCC)C(O)CCCCCCCCCCCCCCCCCCCC	310	TRUE	TRUE	TRUE		FALSE	FALSE	null	null	100	99.9	78.3	99.1	100	359.36	190628_TT1_Hclass_Aging_033_12_24M_SPF_M_Kidney_5_Pos	818.67224:7871 819.67559:6358 820.67895:2035	149.09258:10 184.06917:75 264.25616:12 264.26529:104 265.24475:36 280.25275:10 282.2789:327 285.77875:10 300.28067:104 318.28787:36 356.3439:24 356.35184:48 398.34708:12 428.37662:24 590.55975:12 602.58221:48 620.58441:75 620.61591:103 636.56964:24 638.60687:898 647.82019:10 656.57086:36 656.61761:433 677.53516:60 677.56073:48 775.48816:12 775.49207:24 800.65399:24 818.56415:60 818.65247:24	12.4869	5.17993	13.5473	9.22711	11.0577	17.0375	7.49337	7.22236	9.02123	7.45318	11.1818	11.1902	10.0483	6.51937	11.9854	5.86288	7.57799	9.22003
5451	11.831	818.673	HexCer 40:0;4O|HexCer 18:0;3O/22:0;(2OH)	[M+H]+		0.214	TRUE	11.89	818.672	C46H91NO10	HexCer_AP	YTAGQSULOHKBPZ-UHFFFAOYSA-N	O=C(NC(COC1OC(CO)C(O)C(O)C1O)C(O)C(O)CCCCCCCCCCCCCC)C(O)CCCCCCCCCCCCCCCCCCCC	310	TRUE	TRUE	TRUE		FALSE	FALSE	null	null	100	99.9	75	99	100	257.78	190628_TT1_Hclass_Aging_042_26_9w_SPF_F_Kidney_2_Pos	818.6731:9251 819.67645:7421 820.67981:2428	105.08233:5 123.11085:6 164.00601:18 176.12506:5 184.06728:62 252.26953:18 264.24472:6 264.27209:136 265.24927:43 269.0932:6 275.53482:5 282.27652:263 300.29034:93 311.33191:6 318.29282:18 356.34381:32 393.23291:5 398.35815:30 426.36624:6 428.35324:12 493.16306:5 503.09039:6 590.54926:6 590.59705:18 600.65466:6 602.54413:18 602.59235:49 620.60162:166 633.57782:6 638.60309:809 639.59631:12 655.575…	12.263	5.16338	13.5473	10.2435	10.9373	17.6707	9.81095	7.53213	8.84186	6.92049	11.2867	10.6924	9.92055	6.51937	11.9854	5.48474	7.57799	9.22003
5453	13.91	818.724	TG 48:3|TG 14:0_16:1_18:2	[M+NH4]+	adduct linked to 5972_[M+H]+; adduct linked to 5522_[M+Na]+; similar chromatogram in higher mz_6556	0.946	TRUE	13.88	818.723	C51H92O6	TG	IWSNEFQVYNGXGZ-UHFFFAOYSA-N	O=C(OCC(OC(=O)CCCCCCCC=CCCCCCC)COC(=O)CCCCCCCCCCCCC)CCCCCCCC=CCC=CCCCCC	310	TRUE	TRUE	TRUE		FALSE	FALSE	null	null	100	100	69	96	100	2412.98	190628_TT1_Hclass_Aging_021_5_12M_SPF_M_Kidney_2_Pos	818.72351:61372 819.72686:59362 820.73022:26019	71.08566:24 81.06834:170 83.0819:24 91.04945:12 95.08173:126 97.10229:60 105.07308:12 109.0994:103 111.11951:36 118.09017:10 121.09927:115 123.11651:48 133.09302:12 135.11441:156 137.12473:36 147.12151:12 149.12811:90 151.1483:60 153.12651:48 159.13301:12 161.13058:36 163.14598:94 165.16129:48 175.14841:60 177.16533:48 183.1657:12 183.16949:36 189.11739:12 189.16177:36 191.17416:48 207.16957:12 2…	2.03069	79.6405	1.2642	30.5544	155.66	68.0715	36.9471	2.95472	121.571	21.3931	63.0163	80.2512	5.01496	26.4088	154.285	97.3398	346.211	507.196
5455	13.897	818.752	TG O-49:3|TG O-15:0_16:1_18:2	[M+NH4]+	adduct linked to 5522_[M+Na]+	0.018	TRUE	14.54	818.76	C52H96O5	EtherTG	SXZCMOSQXWANHS-UHFFFAOYSA-N	O=C(OCC(OC(=O)CCCCCCCC=CCC=CCCCCC)COCCCCCCCCCCCCCCC)CCCCCCCC=CCCCCCC	410	TRUE	TRUE	TRUE		FALSE	FALSE	null	null	100	95	66.9	93.1	100	284.17	190628_TT1_Hclass_Aging_036_21_18M_GF_M_Kidney_5_Pos	818.75159:3347 819.75494:9350 820.7583:14472	79.04994:24 81.06242:24 81.07127:117 83.08357:48 93.06518:12 93.0706:48 95.08345:125 97.10402:48 107.08362:12 109.09678:96 111.11537:36 119.08518:12 121.09644:105 123.11053:12 123.11364:60 125.13024:36 133.09485:12 135.11459:164 137.12985:60 147.11485:12 149.12482:24 149.13167:91 151.11739:12 161.09505:12 161.13245:36 163.14246:36 165.16135:24 175.14471:48 179.18063:24 181.16013:12 189.15012:12 1…	0.149989	2.62993	0.105315	1.64628	7.27133	2.78472	1.73218	0.26375	3.17263	0.833036	2.10895	3.43717	0.333482	1.04696	6.20645	4.3918	8.79192	23.0406
5483	14.161	820.741	TG 48:2|TG 14:0_16:0_18:2	[M+NH4]+	adduct linked to 5990_[M+ACN+Na]+; adduct linked to 5547_[M+Na]+	1	TRUE	14.08	820.739	C51H94O6	TG	YUIIXXZIUIOJQY-UHFFFAOYSA-N	O=C(OCC(OC(=O)CCCCCCCCCCCCCCC)COC(=O)CCCCCCCCCCCCC)CCCCCCCC=CCC=CCCCCC	310	TRUE	TRUE	TRUE		FALSE	FALSE	null	null	100	99.9	77.6	96.1	100	6422.67	190628_TT1_Hclass_Aging_037_13_9w_GF_M_Kidney_1_Pos	820.73755:45428 821.7409:38471 822.74426:16487	71.08161:48 81.06399:12 81.06904:94 83.08644:48 85.10274:48 91.0555:12 93.07364:24 95.0838:177 97.09331:12 97.09884:48 107.08692:12 109.09864:60 111.1202:24 119.07948:12 123.11408:48 133.10664:24 135.11671:60 137.13034:74 141.15559:12 149.12877:24 151.14896:24 161.133:12 177.16782:24 179.17561:24 184.06755:36 189.15463:12 211.20258:159 219.20123:12 221.22099:36 229.21419:36 239.22282:48 239.24236…	10.9856	211.016	6.87204	107.158	508.95	342.684	103.99	11.0807	286.366	66.956	165.517	301.317	25.2369	70.1559	628.264	233.271	853.931	831.44
5511	14.449	822.757	TG 48:1|TG 14:0_16:0_18:1	[M+NH4]+	adduct linked to 5575_[M+Na]+; adduct linked to 6012_[M+ACN+Na]+; found in higher mz's MsMs_6829	1	TRUE	14.28	822.755	C51H96O6	TG	GPXZOHHIWJNYTJ-UHFFFAOYSA-N	O=C(OCC(OC(=O)CCCCCCCCCCCCCCC)COC(=O)CCCCCCCCCCCCC)CCCCCCCC=CCCCCCCCC	310	TRUE	TRUE	TRUE		FALSE	FALSE	null	null	100	99.7	76.1	92.6	100	6234.63	190628_TT1_Hclass_Aging_040_25_9w_SPF_F_Kidney_1_Pos	822.7547:50511 823.75805:51797 824.76141:17606	71.085:116 81.06759:48 83.08624:48 85.09865:48 93.0653:12 93.06801:24 95.0822:121 97.09722:48 107.0823:12 109.09104:24 109.09983:95 111.11697:48 123.11533:60 135.10822:12 135.11475:82 149.12325:12 151.14684:48 157.1552:10 163.14439:24 177.15987:12 211.20201:78 219.20686:12 237.21457:80 239.23737:201 243.85837:10 247.24225:36 265.23761:12 265.25134:131 285.21896:12 285.24738:36 311.245:12 313.2807…	16.8472	149.661	9.7958	107.285	427.444	512.413	83.5777	13.6283	176.58	60.5521	116.713	311.614	35.2854	60.4501	673.011	142.53	590.431	412.394
5541	14.816	824.769	TG 48:0|TG 16:0_16:0_16:0	[M+NH4]+	adduct linked to 5606_[M+Na]+; adduct linked to 6041_[M+ACN+Na]+	1	TRUE	14.6	824.77	C51H98O6	TG	PVNIQBQSYATKKL-UHFFFAOYSA-N	O=C(OCC(OC(=O)CCCCCCCCCCCCCCC)COC(=O)CCCCCCCCCCCCCCC)CCCCCCCCCCCCCCC	310	TRUE	TRUE	TRUE		FALSE	FALSE	null	null	100	99.4	81.2	81.4	100	1113.78	190628_TT1_Hclass_Aging_QC_Pos_03	824.76965:15867 825.773:14440 826.77636:4200	81.06679:12 85.09656:36 99.11299:24 113.14131:10 123.1145:24 165.16428:24 211.20938:12 238.4711:12 239.23444:116 256.25565:24 313.2627:60 523.46625:60 549.70764:24 551.49878:3538 552.50098:36 555.53284:24 579.5224:64 607.6109:10 822.0769:10 824.75043:60 824.77057:85 824.83105:24	10.3912	24.5281	7.74904	9.83997	39.2722	28.1393	13.822	9.24429	31.5996	16.6753	26.9176	33.2609	10.4514	20.0207	41.3208	29.5723	65.9738	207.73
5593	13.03	828.689	HexCer 42:1;3O|HexCer 18:1;2O/24:0;O	[M+H]+		0.143	TRUE	12.72	828.692	C48H93NO9	HexCer_HS	ZXWQZGROTQMXME-UHFFFAOYSA-N	O=C(NC(COC1OC(CO)C(O)C(O)C1O)C(O)C=CCCCCCCCCCCCCC)C(O)CCCCCCCCCCCCCCCCCCCCCC	310	TRUE	TRUE	TRUE		FALSE	FALSE	null	null	100	98.8	45.9	96.2	100	346.94	190628_TT1_Hclass_Aging_005_33_18M_SPF_F_Kidney_3_Pos	828.69421:6872 829.69756:8198 830.70092:4910	93.06985:12 102.08377:12 121.09867:24 135.07945:12 135.12186:12 146.98628:24 159.11441:12 184.05632:12 184.06964:193 187.15314:12 191.17493:24 197.07301:12 241.1017:10 247.23862:24 252.25449:12 252.26785:159 264.26352:473 282.26532:36 290.24661:12 292.2941:67 356.3577:12 366.36267:24 384.36353:12 384.38553:36 495.4006:24 525.479:24 546.41724:12 618.60468:127 628.59448:12 630.61188:381 632.62549:8…	8.49832	12.0058	8.79496	14.9706	8.5246	10.4104	8.90399	7.23063	8.67779	11.0645	9.24583	10.7642	5.79774	8.53248	11.3087	9.31096	10.4119	7.69711
5608	14.429	829.798	TG 15:0_18:1(d7)_15:0	[M+NH4]+	found in higher mz's MsMs_6878	0.964	TRUE	14.45	829.799	C51H89O6	TG	YUNYDLOKHYJQAT-OTEPLKBXSA-N	C(OC(=O)CCCCCCCCCCCCCC)[C@](OC(CCCCCCC/C=C\CCCCCC([2H])([2H])C([2H])([2H])C([2H])([2H])[2H])=O)COC(CCCCCCCCCCCCCC)=O	annotated by user-defined text library	TRUE	TRUE	FALSE		TRUE	FALSE	null	null	100	100	null	null	null	10994.6	190628_TT1_Hclass_Aging_024_10_24M_SPF_M_Kidney_3_Pos	829.79865:256109 830.802:171664 831.80536:51636	71.08176:168 73.09392:48 79.05041:24 81.06291:12 81.0667:256 83.08407:98 85.09905:318 93.06439:24 95.08266:241 97.09907:138 99.11569:36 109.09744:158 111.11309:60 113.12927:36 114.12992:24 121.09255:24 121.10027:60 123.11596:125 125.12944:36 130.15616:24 135.11382:116 137.12743:60 139.10626:24 149.12917:76 151.14764:60 158.19557:24 163.14348:48 172.213:60 184.19945:12 203.18312:10 207.20909:60 22…	123.097	123.097	123.097	123.097	123.097	123.097	123.097	123.097	123.097	123.097	123.097	123.097	123.097	123.097	123.097	123.097	123.097	123.097
5642	12.625	832.684	HexCer 41:0;4O|HexCer 18:0;3O/23:0;(2OH)	[M+H]+		0.821	TRUE	12.67	832.687	C47H93NO10	HexCer_AP	MIGCGSNMPJICKZ-UHFFFAOYSA-N	O=C(NC(COC1OC(CO)C(O)C(O)C1O)C(O)C(O)CCCCCCCCCCCCCC)C(O)CCCCCCCCCCCCCCCCCCCCC	310	TRUE	TRUE	TRUE		FALSE	FALSE	null	null	100	100	74.2	97	100	108.13	190628_TT1_Hclass_Aging_015_31_18M_SPF_F_Kidney_1_Pos	832.68628:3011 833.68963:2681 834.69299:1826	184.07188:38 207.03337:12 221.08801:12 247.15086:5 264.2504:6 264.26862:24 264.28003:24 265.26181:12 281.0343:6 281.04608:24 282.27298:72 296.29053:6 299.06006:18 300.29401:30 355.0459:12 355.06705:39 356.07513:18 359.02286:12 369.1593:6 370.37079:12 412.38596:18 415.03735:12 416.05563:12 429.07547:6 440.40341:6 481.40121:6 561.41779:12 604.59412:12 616.60114:30 634.59436:30 634.61908:50 650.5180…	3.09802	2.28289	3.82884	5.24132	3.39272	4.82115	3.34604	1.91917	3.18552	3.06817	3.29561	4.21592	2.33276	2.12644	4.20115	2.3352	3.17724	3.03444
5643	14.048	832.741	TG 49:3|TG 15:0_16:1_18:2	[M+NH4]+	ion correlated with 5966; similar chromatogram in higher mz_7061	0.679	TRUE	14.02	832.739	C52H94O6	TG	CQSXCZMDDSQLAG-UHFFFAOYSA-N	O=C(OCC(OC(=O)CCCCCCCC=CCCCCCC)COC(=O)CCCCCCCCCCCCCC)CCCCCCCC=CCC=CCCCCC	310	TRUE	TRUE	TRUE		FALSE	FALSE	null	null	100	100	58.3	94.4	100	142.79	190628_TT1_Hclass_Aging_014_11_24M_SPF_M_Kidney_4_Pos	832.73438:5712 833.73772:5956 834.74108:3072	97.06179:24 121.09255:12 123.1175:24 133.09564:24 135.1203:12 149.13425:12 167.13733:10 219.20163:12 237.22427:36 245.22867:24 261.22525:10 263.23389:48 272.28229:10 311.25131:24 343.30481:10 355.06421:48 500.18829:10 533.41272:12 533.44843:60 535.43042:12 535.4726:373 537.49414:24 547.47498:166 559.461:97 561.44751:24 561.48737:375 562.48199:24 572.55011:24 573.47382:304 573.55444:48 575.50183:1…	0.117431	4.31342	0.0950764	1.87377	4.62366	1.2767	1.38644	0.177481	4.00666	2.89605	2.47159	3.12955	0.245094	4.53048	3.41524	6.13323	8.93983	24.5343
5644	14.65	832.773	TG O-50:3|TG O-17:1_15:0_18:2	[M+NH4]+		0.018	TRUE	14.71	832.775	C53H98O5	EtherTG	MZKVWMGKVWPZPD-UHFFFAOYSA-N	O=C(OCC(OC(=O)CCCCCCCC=CCC=CCCCCC)COCCCCCCCCC=CCCCCCCC)CCCCCCCCCCCCCC	310	TRUE	TRUE	TRUE		FALSE	FALSE	null	null	100	100	31.8	84.2	100	78.89	190628_TT1_Hclass_Aging_037_13_9w_GF_M_Kidney_1_Pos	832.77344:1359 833.77679:1057 834.78015:784	83.07852:24 99.11656:10 125.13032:12 147.06049:12 147.06558:24 157.08127:10 195.20148:10 245.22533:10 270.2312:10 295.26099:10 326.97751:10 341.10736:24 355.06793:36 356.06808:24 395.29993:10 429.07928:12 499.19507:10 525.45538:12 533.48511:24 535.5061:75 547.49573:24 557.14789:10 559.49194:48 561.51837:115 561.54163:24 567.45917:10 573.50177:24 587.51471:12 587.54871:48 721.49127:10 815.70764:10…	0.0383953	2.28898	0.040747	0.695259	0.280955	0.201663	0.217819	0.0543676	0.450374	0.3669	0.288268	0.264891	0.0482468	0.474305	0.272588	0.722125	0.681064	1.74563
5660	7.647	834.528	BMP 40:9|BMP 18:3_22:6	[M+NH4]+		0.696	TRUE	7.91	834.528	C46H73O10P	BMP	DNCVQSUZUHSSHT-UHFFFAOYSA-N	O=C(OC(CO)COP(=O)(O)OCC(OC(=O)CCCCCCCC=CCC=CCC=CCC)CO)CCC=CCC=CCC=CCC=CCC=CCC=CCC	310	TRUE	TRUE	TRUE		FALSE	FALSE	null	null	100	99	37.7	86.7	100	50.49	190628_TT1_Hclass_Aging_QC_Pos_05	834.52789:4740 835.53124:4333 836.5346:4319	81.07156:24 95.54133:10 105.06658:24 129.0504:12 161.13123:24 169.09457:10 175.12119:24 183.11124:12 184.07516:189 217.15971:10 269.23645:24 284.29868:10 315.19687:10 335.26126:534 337.28885:36 341.28723:12 341.29242:24 355.05841:12 355.06372:24 359.25354:71 361.24564:12 361.27499:131 373.22449:10 383.24487:24 383.25311:36 385.26651:391 399.31461:24 627.5578:12 645.49158:24 649.48694:12 649.50482…	1.26191	3.69713	1.1945	2.16484	1.25361	1.14361	1.59344	1.38373	3.76416	2.56445	2.43987	1.38554	1.4807	3.19004	1.38084	3.21555	2.08666	2.2207
5673	13.287	834.744	TG 49:2|TG 16:0_16:1_17:1	[M+NH4]+		0.018	TRUE	14.22	834.755	C52H96O6	TG	UNLQNCABWOVYJJ-UHFFFAOYSA-N	O=C(OCC(OC(=O)CCCCCCCC=CCCCCCC)COC(=O)CCCCCCCCCCCCCCC)CCCCCCCC=CCCCCCCC	410	TRUE	TRUE	TRUE		FALSE	FALSE	null	null	100	89.7	37	89.5	100	94.14	190628_TT1_Hclass_Aging_006_39_9w_GF_F_Kidney_3_Pos	834.74432:1519 835.74767:2698 836.75103:5143	73.05099:12 91.05328:10 99.0796:24 107.0874:12 116.09776:10 123.1177:24 135.11398:24 141.08778:12 141.12112:36 149.12759:36 153.12425:36 155.10481:60 161.13356:36 163.14897:24 173.09439:12 177.12917:24 179.13676:80 181.08957:24 184.07385:48 195.14188:12 197.07738:92 205.20224:36 207.99759:24 215.17365:24 221.07555:24 223.20033:48 233.18745:24 235.13065:24 239.18874:12 251.19757:180 265.24359:12 2…	0.0518674	0.714423	0.169257	0.475172	1.91831	2.25239	0.745944	0.101995	0.820681	0.312275	0.347593	2.80912	0.175618	0.345814	3.46255	0.605966	2.33901	2.92675
5674	14.365	834.753	TG 49:2|TG 16:0_16:1_17:1	[M+NH4]+	similar chromatogram in higher mz_7128; found in higher mz's MsMs_6904; found in higher mz's MsMs_6616; found in higher mz's MsMs_6560; found in higher mz's MsMs_6092; found in higher mz's MsMs_5973	0.964	TRUE	14.22	834.755	C52H96O6	TG	UNLQNCABWOVYJJ-UHFFFAOYSA-N	O=C(OCC(OC(=O)CCCCCCCC=CCCCCCC)COC(=O)CCCCCCCCCCCCCCC)CCCCCCCC=CCCCCCCC	310	TRUE	TRUE	TRUE		FALSE	FALSE	null	null	100	99.9	51.4	94	100	315.8	190628_TT1_Hclass_Aging_005_33_18M_SPF_F_Kidney_3_Pos	834.75317:5803 835.75652:5381 836.75988:2013	184.06441:12 225.21532:12 237.21594:24 265.2551:12 355.05396:12 521.40326:12 535.46643:197 537.48792:90 547.46875:36 549.48315:204 561.48108:296 563.45776:24 563.49774:328 564.49744:24 573.48419:12 575.50214:234 577.51007:48 577.53369:36 589.50189:48 589.53937:24 592.51398:24 817.68793:24 818.38226:12 834.74438:82	2.73819	9.90855	2.83955	5.3117	10.7972	5.82894	4.74621	2.98483	8.01832	8.36404	5.05514	10.0957	3.08779	11.5285	10.3651	10.8251	18.3199	35.6855
5675	15.011	834.79	TG O-50:2|TG O-16:0_16:0_18:2	[M+NH4]+	ion correlated with 5988	0.411	TRUE	14.93	834.791	C53H100O5	EtherTG	ZYLBHYALOKYHPW-UHFFFAOYSA-N	O=C(OCC(OC(=O)CCCCCCCC=CCC=CCCCCC)COCCCCCCCCCCCCCCCC)CCCCCCCCCCCCCCC	310	TRUE	TRUE	TRUE		FALSE	FALSE	null	null	100	99.9	40	85.2	100	63.98	190628_TT1_Hclass_Aging_048_40_12M_GF_F_Kidney_1_Pos	834.78552:1391 835.78887:1082 836.79223:451	83.08495:12 106.0726:5 176.13405:5 184.07265:18 208.00233:12 263.23706:6 280.99973:6 346.04092:5 355.05972:12 493.19031:5 517.79565:5 535.47638:12 535.50885:37 537.52063:56 537.55316:12 549.48657:18 549.50964:12 561.51776:87 563.54785:34 575.50562:24 577.51019:12 589.55994:30 649.48065:6 649.50928:18 817.7558:12 834.50885:12	0.167278	4.12809	0.15066	1.40061	0.619589	0.490811	0.527261	0.173886	0.797329	0.681906	0.702706	0.58105	0.138179	0.847086	0.569957	1.51685	1.17294	2.73569
5694	7.837	836.543	BMP 40:8|BMP 18:2_22:6	[M+NH4]+	adduct linked to 5459_[M+H]+; adduct linked to 5768_[M+H]+	0.946	TRUE	7.95	836.544	C46H75O10P	BMP	VZNVSSRNAYGTMV-UHFFFAOYSA-N	O=C(OC(CO)COP(=O)(O)OCC(OC(=O)CCCCCCCC=CCC=CCCCCC)CO)CCC=CCC=CCC=CCC=CCC=CCC=CCC	310	TRUE	TRUE	TRUE		FALSE	FALSE	null	null	100	99.9	67	87.2	100	741.13	190628_TT1_Hclass_Aging_021_5_12M_SPF_M_Kidney_2_Pos	836.54364:26831 837.54699:21229 838.55035:12361	77.03881:12 79.05314:60 81.06694:36 83.08431:24 86.09892:12 91.05464:48 93.06872:60 95.0843:24 105.06858:36 107.08312:24 109.09774:24 115.04798:10 121.10986:12 125.09996:12 131.08664:48 132.04427:12 133.10088:48 135.11906:48 137.09492:24 141.07132:24 145.10458:24 147.11784:36 149.13127:36 153.13145:24 155.10858:24 158.11128:12 161.0929:24 161.13206:36 166.07111:12 171.12138:24 173.12611:36 175.14…	10.6312	37.9894	8.54544	18.4072	15.6324	9.21145	15.8268	12.8833	41.1712	24.694	26.6133	14.6301	14.054	32.0905	16.4832	34.0179	19.0992	26.2849
5708	13.165	836.729	TG 48:2;1O|TG 14:0_16:0_18:2;1O	[M+NH4]+	ion correlated with 5672	0.143	TRUE	13.7	836.734	C51H94O7	OxTG	JKPMYQUAYXLYNH-UHFFFAOYSA-N	O=C(OCC(OC(=O)CCCCCCCCCCCCCCC)COC(=O)CCCCCCC(O)C=CCC=CCCCCC)CCCCCCCCCCCCC	410	TRUE	TRUE	TRUE		FALSE	FALSE	null	null	100	96.5	38.7	89.9	100	68.18	190628_TT1_Hclass_Aging_043_37_9w_GF_F_Kidney_1_Pos	836.72937:5762 837.73272:4510 838.73608:3182	81.07395:36 95.08498:24 121.0997:12 135.11804:24 141.08527:10 153.16675:10 155.10565:36 184.07281:71 185.07172:24 223.20961:12 235.20686:36 238.22275:12 252.20024:24 255.14799:12 261.23544:24 266.14337:10 279.21286:12 283.23422:12 297.25113:10 313.26831:36 317.23953:24 326.10788:10 339.28027:24 343.1188:24 367.15448:24 417.34552:36 459.21417:76 460.20398:24 477.22729:36 509.34412:12 519.41302:24 …	0.158072	2.38094	0.0959122	0.904577	16.8629	11.044	4.09707	0.31632	4.28856	1.13621	1.75802	15.902	0.537662	0.496513	30.6312	1.99407	12.7166	8.94526
5711	14.616	836.771	TG 49:1|TG 15:0_16:0_18:1	[M+NH4]+		0.875	TRUE	14.38	836.77	C52H98O6	TG	IVRUJYRTYXTTIH-UHFFFAOYSA-N	O=C(OCC(OC(=O)CCCCCCCCCCCCCCC)COC(=O)CCCCCCCCCCCCCC)CCCCCCCC=CCCCCCCCC	310	TRUE	TRUE	TRUE		FALSE	FALSE	null	null	100	99.2	60.7	95.8	100	172	190628_TT1_Hclass_Aging_024_10_24M_SPF_M_Kidney_3_Pos	836.76953:7741 837.77288:5518 838.77624:2102	72.09198:10 79.05405:24 83.08396:24 93.05343:12 95.08527:124 107.08413:12 109.10169:24 121.10011:24 123.11423:24 135.11852:24 149.12212:12 149.13068:36 151.075:322 184.06401:12 191.10326:24 203.16885:12 205.11353:24 217.19315:24 225.21495:24 225.2339:12 235.23367:10 239.24055:24 251.22845:24 259.24689:10 313.27716:24 325.12946:12 327.30392:24 361.03296:12 459.21335:73 460.22122:24 477.22037:48 49…	0.396527	4.6487	0.347081	2.25606	5.94842	3.92204	1.95864	0.471336	3.44119	4.88532	2.44736	5.28286	0.761913	7.30334	6.9769	6.65207	9.00862	14.9725
5712	15.405	836.804	TG O-50:1|TG O-16:0_16:0_18:1	[M+NH4]+		0.429	TRUE	15.14	836.807	C53H102O5	EtherTG	NSEKYLOUAKIDTL-UHFFFAOYSA-N	O=C(OCC(OC(=O)CCCCCCCC=CCCCCCCCC)COCCCCCCCCCCCCCCCC)CCCCCCCCCCCCCCC	310	TRUE	TRUE	TRUE		FALSE	FALSE	null	null	100	99.2	50.4	77.4	100	92.11	190628_TT1_Hclass_Aging_047_1_9w_SPF_M_Kidney_1_Pos	836.80377:4615 837.80712:4469 838.81048:1772	71.08275:18 81.07025:24 85.0975:18 95.08373:6 97.10153:30 99.11677:18 109.10294:18 111.11419:24 127.14615:6 239.23122:12 281.29684:12 289.29556:12 307.28009:6 368.17743:12 373.11557:6 385.16684:12 417.16843:12 421.25662:5 459.19382:6 459.21487:34 460.21371:12 478.21555:12 492.15445:5 537.4765:18 537.52203:122 549.48145:12 551.49957:116 563.54266:517 564.54907:18 565.56305:18 573.05914:5 577.5083:…	0.299753	3.95974	0.227556	1.28418	0.640056	0.533813	0.639628	0.253865	0.783984	0.694652	0.65675	0.523372	0.230813	0.901021	0.621771	1.65237	0.97688	2.24066
5729	8.051	838.562	BMP 40:7|BMP 18:1_22:6	[M+NH4]+	adduct linked to 5485_[M+H]+	0.946	TRUE	8.16	838.559	C46H77O10P	BMP	ZLQZKMCFSDQKCB-UHFFFAOYSA-N	O=C(OC(CO)COP(=O)(O)OCC(OC(=O)CCCCCCCC=CCCCCCCCC)CO)CCC=CCC=CCC=CCC=CCC=CCC=CCC	310	TRUE	TRUE	TRUE		FALSE	FALSE	null	null	100	99.9	74.7	86.5	100	807.62	190628_TT1_Hclass_Aging_009_20_18M_GF_M_Kidney_3_Pos	838.55847:38402 839.56182:32752 840.56518:11455	73.02735:10 79.05353:48 79.55461:10 81.07364:48 91.06174:12 93.06641:24 95.08607:36 97.09975:36 107.08499:36 109.09816:36 117.06944:36 119.09278:12 131.08064:24 131.08707:48 133.09807:48 135.11784:24 143.08043:24 145.09656:48 147.11317:36 149.12827:36 159.12254:36 161.13072:48 171.11998:60 173.1321:36 181.15269:12 184.07657:256 187.14861:36 189.1252:24 197.13539:24 211.14499:12 213.12943:24 223.1…	8.24189	35.9678	8.45822	13.9616	12.2011	8.40241	14.38	12.3248	37.2171	22.7804	25.3212	13.3332	12.9056	25.5678	12.8986	29.7697	17.1291	19.5797
5740	13.594	838.694	TG 50:7|TG 12:0_16:1_22:6	[M+NH4]+		0.232	TRUE	13.57	838.692	C53H88O6	TG	YXTGOPPZEULCSO-UHFFFAOYSA-N	O=C(OCC(OC(=O)CCCCCCCC=CCCCCCC)COC(=O)CCCCCCCCCCC)CCC=CCC=CCC=CCC=CCC=CCC=CCC	310	TRUE	TRUE	TRUE		FALSE	FALSE	null	null	100	100	23.4	66.9	100	42.01	190628_TT1_Hclass_Aging_021_5_12M_SPF_M_Kidney_2_Pos	838.69354:1584 839.69689:2112 840.70025:3250	128.06421:10 151.14919:12 175.15302:10 184.06592:36 187.15131:24 211.14375:12 223.13716:12 227.1712:12 237.15723:10 255.15802:12 262.30582:10 265.17706:12 269.22073:24 283.22363:12 293.24048:10 313.27213:36 443.19635:10 451.41068:12 491.39355:12 493.4299:166 511.3974:10 523.44617:12 523.46539:24 535.4306:10 549.4765:12 565.43127:24 565.48132:36 567.43164:24 570.55444:24 571.54358:24 576.61346:10 …	0.109124	1.25342	0.086927	0.468442	0.366543	0.701371	0.708777	0.192308	0.832358	0.347781	0.436998	0.944207	0.148986	0.866122	0.554187	1.18096	1.40684	2.2146
5742	14.986	838.781	TG 49:0|TG 16:0_16:0_17:0	[M+NH4]+		0.071	TRUE	14.82	838.786	C52H100O6	TG	TTWJTJMWHOYBPQ-UHFFFAOYSA-N	O=C(OCC(OC(=O)CCCCCCCCCCCCCCC)COC(=O)CCCCCCCCCCCCCCCC)CCCCCCCCCCCCCCC	310	TRUE	TRUE	TRUE		FALSE	FALSE	null	null	100	99.7	52.3	87.4	100	39.09	190628_TT1_Hclass_Aging_021_5_12M_SPF_M_Kidney_2_Pos	838.78217:978 839.78552:839 840.78888:320	85.10288:5 123.1143:5 225.22131:5 228.13033:2 243.20694:2 344.13223:5 458.19159:2 499.19748:24 521.26556:5 523.47198:5 537.49451:21 539.52313:5 551.50464:56 557.23669:5 565.51819:130 579.49133:5 579.53857:22 593.53925:7 650.87994:2 653.55322:7 682.25024:5 773.52313:5 779.61133:5 800.01416:2 838.35291:5 838.79578:10	0.120799	0.509292	0.107823	0.226817	0.697735	0.53233	0.267952	0.172988	0.525436	0.350512	0.377673	0.563961	0.168285	0.462408	0.786225	0.683405	1.2211	4.18603
5763	13.437	840.685	HexCer 43:2;3O|HexCer 20:1;2O/23:1;O	[M+H]+		0.893	TRUE	12.49	840.692	C49H93NO9	HexCer_HS	IKGHBARRWFYPNG-UHFFFAOYSA-N	O=C(NC(COC1OC(CO)C(O)C(O)C1O)C(O)C=CCCCCCCCCCCCCCCC)C(O)CCCCCCCCCC=CCCCCCCCCCC	410	TRUE	TRUE	TRUE		FALSE	FALSE	null	null	100	89.4	50.3	87	100	620.7	190628_TT1_Hclass_Aging_041_46_24M_GF_F_Kidney_2_Pos	840.68585:13605 841.6892:14755 842.69256:11071	129.11555:10 135.11159:24 179.07391:10 197.07645:12 221.07874:12 281.04263:24 292.29599:226 310.31528:24 341.00674:12 355.07104:36 371.08273:12 445.08749:12 524.48193:24 525.47858:24 541.29895:10 547.49316:24 548.45886:24 549.48462:60 551.49945:24 552.52472:36 565.46619:12 574.47406:10 630.62213:12 642.64526:60 655.58282:12 660.65472:154 660.67999:138 795.62:12 817.60144:48 822.70886:101 822.7169…	5.11925	7.64272	6.17012	8.35223	7.20596	4.91056	15.1241	13.2649	11.2932	12.2682	15.5424	11.1674	16.3065	14.0548	11.864	17.9585	13.4731	9.00226
5765	13.749	840.706	TG 50:6|TG 12:0_16:0_22:6	[M+NH4]+		0.321	TRUE	13.7	840.708	C53H90O6	TG	MLHGBIWZPHKGMZ-UHFFFAOYSA-N	O=C(OCC(OC(=O)CCCCCCCCCCCCCCC)COC(=O)CCCCCCCCCCC)CCC=CCC=CCC=CCC=CCC=CCC=CCC	310	TRUE	TRUE	TRUE		FALSE	FALSE	null	null	100	99.9	62.8	83.5	100	112.03	190628_TT1_Hclass_Aging_003_27_9w_SPF_F_Kidney_3_Pos	840.7077:1699 841.71105:1857 842.71441:2775	147.10759:12 175.15726:10 199.14346:24 215.17598:10 264.1846:10 285.24445:12 311.22467:24 481.18011:10 495.42731:126 567.43884:36 584.56268:10 595.45551:36 623.47437:12 623.49542:48 823.67004:24 840.70709:36	0.395629	3.26513	0.355022	1.58301	1.09777	1.72155	1.75293	0.673978	2.54378	1.4066	1.49147	2.81126	0.50524	2.15975	1.61075	2.88173	3.55667	4.18603
5815	11.763	844.689	HexCer 42:1;4O|HexCer 18:0;3O/24:1;(2OH)	[M+H]+		0.714	TRUE	12.26	844.687	C48H93NO10	HexCer_AP	QTVCEEPQSRXILU-UHFFFAOYSA-N	O=C(NC(COC1OC(CO)C(O)C(O)C1O)C(O)C(O)CCCCCCCCCCCCCC)C(O)CCCCCCCCCCC=CCCCCCCCCCC	310	TRUE	TRUE	TRUE		FALSE	FALSE	null	null	100	97.5	89.8	96.2	100	62.96	190628_TT1_Hclass_Aging_010_8_18M_SPF_M_Kidney_3_Pos	844.68658:898 845.68993:693 846.69329:426	175.13948:3 184.06921:12 235.09331:6 261.21567:3 264.26569:9 282.28177:32 300.28128:6 628.59637:9 646.61273:20 664.6123:138 682.62433:80 822.6236:3 844.67474:12	1.58496	1.10836	1.53305	1.64613	1.54192	1.8235	1.76988	1.32304	1.47805	1.33619	1.88567	1.72848	1.62433	1.14853	1.73432	1.31521	1.47659	1.41901
5816	13.96	844.738	TG 50:4|TG 16:1_16:1_18:2	[M+NH4]+	adduct linked to 5874_[M+Na]+	0.946	TRUE	13.96	844.739	C53H94O6	TG	PVMBAGXWHHZKFP-UHFFFAOYSA-N	O=C(OCC(OC(=O)CCCCCCCC=CCCCCCC)COC(=O)CCCCCCCC=CCCCCCC)CCCCCCCC=CCC=CCCCCC	310	TRUE	TRUE	TRUE		FALSE	FALSE	null	null	100	100	75.8	92.4	100	4178.55	190628_TT1_Hclass_Aging_039_41_12M_GF_F_Kidney_2_Pos	844.73761:135694 845.74096:108222 846.74432:57205	71.08518:36 79.05026:48 81.07033:367 83.08262:141 91.0649:12 93.06961:63 95.0852:274 97.09887:136 99.07916:36 105.06518:12 107.08114:48 109.10014:272 111.08178:36 111.1158:67 113.0932:36 115.47825:12 119.09177:24 121.10154:211 123.11568:238 125.0962:24 127.10834:36 133.09052:12 133.10022:85 135.11513:288 137.12711:133 139.11256:65 145.10724:12 147.11711:69 149.13223:166 151.14383:90 153.12375:36 …	3.28022	153.12	2.03819	47.8672	180.509	68.503	51.847	4.65225	193.969	37.7907	113.463	106.255	8.06146	56.317	143.589	228.163	489.283	1302.52
5818	14.134	844.74	TG 50:4|TG 14:0_16:0_20:4	[M+NH4]+		0.018	TRUE	14.01	844.739	C53H94O6	TG	PDTDPJCFQFBLEY-UHFFFAOYSA-N	O=C(OCC(OC(=O)CCCCCCCCCCCCCCC)COC(=O)CCCCCCCCCCCCC)CCCCCCC=CCC=CCC=CCC=CCC	310	TRUE	TRUE	TRUE		FALSE	FALSE	null	null	100	99.8	48.3	83.7	100	605.27	190628_TT1_Hclass_Aging_040_25_9w_SPF_F_Kidney_1_Pos	844.74017:9477 845.74352:10753 846.74688:23091	71.5793:10 91.05142:12 95.08509:24 133.1049:24 145.06648:12 151.14191:10 163.11958:12 185.13498:36 199.14636:12 201.16325:36 203.17833:97 208.2012:10 211.20439:48 213.16452:12 239.22256:12 259.2439:24 269.22232:121 285.24313:83 287.22299:36 287.23962:137 288.24643:10 313.2663:91 341.30496:12 361.25854:12 484.24255:12 521.76385:12 523.48322:627 524.48212:48 543.43628:24 547.45068:24 561.45947:10 5…	1.88227	9.72464	1.41904	8.31619	8.00814	7.61573	6.29428	1.8157	9.41949	4.4729	7.24013	11.4138	2.09159	6.08189	10.5634	19.9436	17.7696	32.0466
5845	12.927	846.705	HexCer 42:0;4O|HexCer 18:0;3O/24:0;(2OH)	[M+H]+	adduct linked to 6067_[M+Na]+	0.857	TRUE	12.85	846.703	C48H95NO10	HexCer_AP	ODTUNRBWGNXHMQ-UHFFFAOYSA-N	O=C(NC(COC1OC(CO)C(O)C(O)C1O)C(O)C(O)CCCCCCCCCCCCCC)C(O)CCCCCCCCCCCCCCCCCCCCCC	310	TRUE	TRUE	TRUE		FALSE	FALSE	null	null	100	99.9	81.2	97.5	100	605.79	190628_TT1_Hclass_Aging_001_38_9w_GF_F_Kidney_2_Pos	846.70361:9397 847.70696:9797 848.71032:3441	86.09876:10 164.00652:36 184.06973:102 249.11102:10 254.27776:24 264.25455:12 264.26367:214 265.25226:48 282.2749:314 297.24728:10 300.28381:156 308.26038:10 318.2886:24 318.29111:36 384.36649:12 384.38025:106 426.39044:36 454.42007:12 456.41736:36 543.69202:10 573.48309:12 618.61206:24 630.58765:12 630.60529:48 646.55762:10 648.63226:245 661.60797:24 666.63428:1196 667.63092:24 684.64038:954 685…	15.3545	9.03437	17.6733	26.095	16.9239	27.7337	14.3757	11.292	15.3519	11.7325	12.9683	18.5057	10.8111	6.27617	24.607	8.88306	14.1179	12.8537
5847	14.199	846.754	TG 50:3|TG 16:0_16:1_18:2	[M+NH4]+	adduct linked to 5891_[M+Na]+; adduct linked to 6272_[M+ACN+Na]+; similar chromatogram in higher mz_6773	0.946	TRUE	14.1	846.755	C53H96O6	TG	HDFLQJUGWGNORO-UHFFFAOYSA-N	O=C(OCC(OC(=O)CCCCCCCC=CCCCCCC)COC(=O)CCCCCCCCCCCCCCC)CCCCCCCC=CCC=CCCCCC	310	TRUE	TRUE	TRUE		FALSE	FALSE	null	null	100	99.9	81.4	96	100	15059.1	190628_TT1_Hclass_Aging_020_7_18M_SPF_M_Kidney_1_Pos	846.75391:596708 847.75726:506692 848.76062:195548	71.0473:36 71.08397:306 77.03717:36 79.05273:134 81.06903:1030 83.08387:553 85.0652:48 85.10014:224 91.05416:60 93.06146:12 93.06958:231 95.0838:996 97.06013:48 97.09884:346 99.07913:91 99.11545:73 101.09634:24 105.06802:60 107.08401:179 109.09864:744 111.07879:65 111.11429:287 113.09168:36 119.08408:93 121.10151:469 123.11564:587 125.08989:36 125.13069:60 127.11305:36 133.09695:126 135.11346:755…	18.4484	567.27	10.6774	222.135	814.88	470.465	234.16	22.9409	672.1	172.796	436.085	573.163	52.6793	202.673	912.283	795.221	1819.88	3488.17
5861	8.613	848.613	Hex2Cer 33:1;2O|Hex2Cer 17:1;2O/16:0	[M+H]+		0.036	TRUE	8.63	848.609	C45H85NO13	Hex2Cer	QRGXODPBNPONKD-UHFFFAOYSA-N	O=C(NC(COC1OC(CO)C(OC2OC(CO)C(O)C(O)C2O)C(O)C1O)C(O)C=CCCCCCCCCCCCC)CCCCCCCCCCCCCCC	310	TRUE	TRUE	TRUE		FALSE	FALSE	null	null	100	100	26	78.1	100	66.88	190628_TT1_Hclass_Aging_024_10_24M_SPF_M_Kidney_3_Pos	848.60754:1218 849.61089:1366 850.61425:1490	137.13058:24 184.0679:60 241.15874:10 250.25316:81 256.26208:12 264.2663:48 268.25708:36 323.31046:10 341.3035:163 354.31134:24 385.25635:36 459.23459:12 488.47754:48 490.4985:24 506.48492:114 588.52161:24 649.49561:12 651.53198:524 652.51367:24 668.53229:48 790.58093:24 830.60333:68 848.59021:48	0.230391	1.4082	0.207743	0.50221	0.290273	0.214013	0.322277	0.318026	2.3721	1.26328	1.61259	0.408045	0.217589	2.37091	0.308354	1.45121	0.75925	1.06462
5869	13.326	848.768	TG 50:2|TG 16:0_16:1_18:1	[M+NH4]+		0.429	TRUE	14.3	848.77	C53H98O6	TG	TWJCMQZMAPGUSG-UHFFFAOYSA-N	O=C(OCC(OC(=O)CCCCCCCC=CCCCCCC)COC(=O)CCCCCCCCCCCCCCC)CCCCCCCC=CCCCCCCCC	410	TRUE	TRUE	TRUE		FALSE	FALSE	null	null	100	88.8	77.9	94.6	100	170.08	190628_TT1_Hclass_Aging_021_5_12M_SPF_M_Kidney_2_Pos	848.76929:5156 849.77264:3359 850.776:3549	95.08699:12 121.09591:12 179.18401:10 237.20773:12 263.23929:12 536.37439:10 549.45532:48 549.48492:372 550.48199:24 551.50635:141 574.47107:24 575.4939:392 576.49744:36 577.52209:323 603.53748:36 831.77045:24 848.74762:66 848.79663:48	0.29167	9.33701	0.150451	2.70767	4.43015	6.33013	3.43843	0.396749	8.13008	2.8742	4.07335	6.16084	0.504082	3.21861	9.0292	6.22034	28.7767	51.8391
5871	14.491	848.772	TG 50:2|TG 16:0_16:1_18:1	[M+NH4]+	adduct linked to 5925_[M+Na]+	1	TRUE	14.3	848.77	C53H98O6	TG	TWJCMQZMAPGUSG-UHFFFAOYSA-N	O=C(OCC(OC(=O)CCCCCCCC=CCCCCCC)COC(=O)CCCCCCCCCCCCCCC)CCCCCCCC=CCCCCCCCC	310	TRUE	TRUE	TRUE		FALSE	FALSE	null	null	100	99.6	90.1	96.2	100	16711.7	190628_TT1_Hclass_Aging_018_24_24M_GF_M_Kidney_3_Pos	848.76941:336914 849.77276:289518 850.77612:94667	71.08506:202 77.03584:12 79.05512:60 81.06893:341 83.08632:252 85.09873:88 93.0681:123 95.08366:621 97.10147:230 99.11531:60 101.09197:12 107.08241:80 109.09995:314 111.08159:36 111.11413:167 113.09748:24 121.09052:12 121.09979:173 123.11546:316 125.12894:132 135.11652:299 137.13179:289 139.11397:48 141.12038:36 145.10191:12 147.12877:12 149.13197:371 151.15047:187 153.12:74 155.14075:36 163.1087…	53.2781	702.315	34.9559	375.09	1073.63	1045.73	329.716	47.5779	746.441	275.913	508.918	928.787	120.835	260.587	1756.59	838.653	2106.15	2926
5887	14.825	850.785	TG 50:1|TG 16:0_16:0_18:1	[M+NH4]+	adduct linked to 5941_[M+Na]+; found in higher mz's MsMs_6975	1	TRUE	14.62	850.786	C53H100O6	TG	YHMDGPZOSGBQRH-UHFFFAOYSA-N	O=C(OCC(OC(=O)CCCCCCCCCCCCCCC)COC(=O)CCCCCCCCCCCCCCC)CCCCCCCC=CCCCCCCCC	310	TRUE	TRUE	TRUE		FALSE	FALSE	null	null	100	99.4	85.9	89.9	100	8636.66	190628_TT1_Hclass_Aging_024_10_24M_SPF_M_Kidney_3_Pos	850.78552:106135 851.78887:76080 852.79223:24268	71.08279:112 81.06652:111 83.08261:171 85.10016:60 93.06148:12 95.08245:87 97.09886:60 99.11128:24 109.09428:24 109.09867:116 111.1158:48 115.05795:10 121.10001:69 123.11725:36 135.11841:60 137.12875:60 149.13228:48 151.14214:60 153.13074:24 163.14671:36 191.17682:12 221.22325:60 237.17867:12 239.23386:408 247.23651:84 257.24207:48 265.25458:251 267.26715:24 270.37756:10 281.05038:24 295.05963:24…	45.1428	269.835	32.4148	220.395	485.285	844.944	144.958	29.7674	228.832	124.548	201.734	516.846	92.4404	121.298	1052.66	355.687	742.618	719.494
5911	15.246	852.8	TG 50:0|TG 16:0_16:0_18:0	[M+NH4]+	adduct linked to 6337_[M+ACN+Na]+; adduct linked to 5956_[M+Na]+	1	TRUE	14.97	852.802	C53H102O6	TG	DQKMNCLZNGAXNX-UHFFFAOYSA-N	O=C(OCC(OC(=O)CCCCCCCCCCCCCCC)COC(=O)CCCCCCCCCCCCCCCCC)CCCCCCCCCCCCCCC	310	TRUE	TRUE	TRUE		FALSE	FALSE	null	null	100	99.2	86.6	90.1	100	1103.08	190628_TT1_Hclass_Aging_048_40_12M_GF_F_Kidney_1_Pos	852.8009:29761 853.80425:28452 854.80761:9206	81.06508:36 81.07014:36 85.09738:24 95.08222:82 109.09984:24 111.11698:24 123.12:36 137.12997:12 151.13992:12 165.15785:12 221.22868:24 239.23727:89 257.24557:24 267.27066:89 284.29776:24 299.28415:24 313.25821:12 313.2731:60 341.30682:24 537.34198:10 549.73358:36 551.49835:4094 552.51044:24 577.63861:24 579.53204:4249 580.19098:24 580.53577:60 581.7738:24 604.09784:10 607.53418:24 607.57568:69 8…	7.10156	24.0598	7.00515	8.72271	54.7508	38.2002	16.5335	11.5372	39.4578	21.3986	23.7449	41.0858	12.7344	25.0937	49.2236	17.8924	76.8811	257.059
5960	7.615	858.524	BMP 42:11|BMP 20:5_22:6	[M+NH4]+		0.875	TRUE	7.75	858.528	C48H73O10P	BMP	VQPRNVJXSHNUNU-UHFFFAOYSA-N	O=C(OC(CO)COP(=O)(O)OCC(OC(=O)CCCC=CCC=CCC=CCC=CCC=CCC)CO)CCC=CCC=CCC=CCC=CCC=CCC=CCC	310	TRUE	TRUE	TRUE		FALSE	FALSE	null	null	100	99.8	30.6	69.4	100	66.81	190628_TT1_Hclass_Aging_QC_Pos_03	858.52997:2902 859.53332:2815 860.53668:1526	117.06978:12 131.08739:24 135.11816:12 147.10835:24 173.12682:12 184.0692:510 186.07735:24 199.14827:12 201.16319:36 359.25299:278 361.27176:24 383.23605:12 383.25528:36 385.27695:272 499.22086:10 628.46753:10 669.47327:24 669.51318:24 701.43188:12 800.55121:24 822.5318:12 840.56567:60 840.60229:36 858.57312:184 858.59363:261	0.885775	2.60382	0.8134	1.23654	0.673825	0.792532	0.937205	1.04762	2.79501	1.79143	2.12464	0.809377	1.04264	2.66657	0.819466	1.86135	1.24645	1.61572
5966	14.098	858.754	TG 51:4|TG 16:1_17:1_18:2	[M+NH4]+		0.75	TRUE	14.04	858.755	C54H96O6	TG	LJSWNLLJRASQSC-UHFFFAOYSA-N	O=C(OCC(OC(=O)CCCCCCCC=CCCCCCCC)COC(=O)CCCCCCCC=CCCCCCC)CCCCCCCC=CCC=CCCCCC	310	TRUE	TRUE	TRUE		FALSE	FALSE	null	null	100	100	66.8	93.5	100	162.14	190628_TT1_Hclass_Aging_039_41_12M_GF_F_Kidney_2_Pos	858.7536:4071 859.75695:3477 860.76031:2450	71.08854:12 109.1013:12 175.14304:12 225.21828:10 245.22107:36 263.24191:48 559.4458:12 559.46576:79 561.46881:283 563.47882:24 563.50879:36 571.60175:10 573.46851:94 573.48865:222 575.4931:36 585.48975:24 587.50824:175 595.88074:10 599.49292:48 601.51129:24 841.72894:36 844.59729:12 858.76569:67	0.161215	4.82554	0.101136	1.89396	4.18641	1.46798	1.28012	0.227805	4.13844	3.3458	2.815	3.17014	0.306849	6.62044	2.82726	8.45932	9.53834	38.3691
5978	7.812	860.545	BMP 42:10|BMP 20:4_22:6	[M+NH4]+	adduct linked to 6034_[M+Na]+	0.946	TRUE	7.94	860.544	C48H75O10P	BMP	AUTHWUWXNBGLGD-UHFFFAOYSA-N	O=C(OC(CO)COP(=O)(O)OCC(OC(=O)CCCCCCC=CCC=CCC=CCC=CCC)CO)CCC=CCC=CCC=CCC=CCC=CCC=CCC	310	TRUE	TRUE	TRUE		FALSE	FALSE	null	null	100	99.8	81.5	85.6	100	753.24	190628_TT1_Hclass_Aging_036_21_18M_GF_M_Kidney_5_Pos	860.54321:16250 861.54656:16140 862.54992:5995	81.06764:36 83.08885:12 91.05133:36 93.06807:48 98.98401:24 103.03541:12 105.07073:36 117.07885:12 119.08388:48 129.04861:24 131.07932:12 131.08252:60 133.10158:60 135.1165:36 142.07208:24 145.1002:60 147.11343:36 149.12854:24 157.10083:24 161.12563:24 171.11472:36 175.14505:48 184.07489:67 185.13107:36 187.14497:24 189.1582:24 189.16978:12 195.11748:12 197.13559:12 201.16318:24 203.17422:92 211.…	5.32732	18.0859	5.2378	7.03813	10.2729	6.10302	10.3731	9.80063	19.2104	13.7893	16.7443	12.7744	9.95445	14.0345	13.4651	16.081	15.2461	16.2312
5980	8.448	860.61	Hex2Cer 34:2;2O|Hex2Cer 18:2;2O/16:0	[M+H]+	adduct linked to 6174_[M+NH4]+	0.518	TRUE	8.57	860.609	C46H85NO13	Hex2Cer	OWIFQVJMGPZAMM-UHFFFAOYSA-N	O=C(NC(COC1OC(CO)C(OC2OC(CO)C(O)C(O)C2O)C(O)C1O)C(O)C=CCCC=CCCCCCCCCC)CCCCCCCCCCCCCCC	310	TRUE	TRUE	TRUE		FALSE	FALSE	null	null	100	99.9	80.2	85	100	2901.56	190628_TT1_Hclass_Aging_020_7_18M_SPF_M_Kidney_1_Pos	860.60944:52452 861.61279:51107 862.61615:28549	79.05272:12 81.06524:24 85.10402:24 91.05549:12 105.06945:12 133.09532:24 133.10179:24 145.04128:12 147.11877:24 155.14272:12 161.13657:12 175.14162:12 184.06946:48 245.21289:12 245.22168:36 250.25267:374 256.24811:12 256.2616:97 261.41537:60 262.25546:4180 263.25168:36 264.27032:48 280.26035:464 361.24036:12 442.30997:24 488.4827:168 498.88632:12 500.48285:1011 501.48157:24 502.49704:167 516.840…	0.212417	89.5765	0.354831	15.433	0.276628	0.186162	0.318755	0.351068	211.227	66.0817	128.047	0.427631	0.251746	106.96	0.279054	126.21	44.4943	70.2134
5987	14.353	860.768	TG 51:3|TG 16:1_17:1_18:1	[M+NH4]+		0.839	TRUE	14.28	860.77	C54H98O6	TG	VMZMPPFYTBICED-UHFFFAOYSA-N	O=C(OCC(OC(=O)CCCCCCCC=CCCCCCCC)COC(=O)CCCCCCCC=CCCCCCCCC)CCCCCCCC=CCCCCCC	310	TRUE	TRUE	TRUE		FALSE	FALSE	null	null	100	100	59.2	92.9	100	392.18	190628_TT1_Hclass_Aging_036_21_18M_GF_M_Kidney_5_Pos	860.76819:6945 861.77154:6162 862.7749:2940	95.09033:18 107.0793:6 107.08656:6 119.08369:6 133.103:6 147.1234:6 149.13686:18 161.13249:6 225.21811:6 233.2354:12 237.21664:24 239.22859:12 251.22728:12 263.23264:61 265.2421:12 265.25125:24 313.26819:12 337.29556:6 339.27759:12 527.47076:5 547.46289:24 561.48181:349 561.7179:12 563.49847:253 563.55176:12 570.56525:12 573.48157:40 575.49945:330 576.50305:12 577.51416:12 585.60144:6 587.49432:1…	0.406407	12.7238	0.292334	3.90907	11.013	4.7539	3.95186	0.635786	10.075	11.0771	7.75149	10.1748	1.00083	19.4116	10.2975	20.9358	26.018	84.5023
5988	15.06	860.803	TG O-52:3|TG O-18:1_16:0_18:2	[M+NH4]+	ion correlated with 5675	0.375	TRUE	14.94	860.807	C55H102O5	EtherTG	UJOAHNHSAUWHQW-UHFFFAOYSA-N	O=C(OCC(OC(=O)CCCCCCCC=CCC=CCCCCC)COCCCCCCCCC=CCCCCCCCC)CCCCCCCCCCCCCCC	310	TRUE	TRUE	TRUE		FALSE	FALSE	null	null	100	99.8	71.2	90.6	100	130.07	190628_TT1_Hclass_Aging_004_14_9w_GF_M_Kidney_2_Pos	860.80255:2443 861.8059:1680 862.80926:901	561.49884:12 561.5354:36 563.52557:155 573.49548:12 575.49658:60 577.52478:24 587.539:200 589.5542:24 601.52179:24 843.77026:24 860.75763:24	0.117431	4.66568	0.133525	1.64426	0.50609	0.348461	0.461569	0.161305	0.854042	0.891303	0.704377	0.50201	0.158635	1.09376	0.470834	1.7966	1.13167	2.89201
5992	7.966	862.56	BMP 42:9|BMP 20:3_22:6	[M+NH4]+		0.911	TRUE	8.04	862.559	C48H77O10P	BMP	HRUFTDQSNBUUSX-UHFFFAOYSA-N	O=C(OC(CO)COP(=O)(O)OCC(OC(=O)CCCCCCCCCC=CCC=CCC=CCC)CO)CCC=CCC=CCC=CCC=CCC=CCC=CCC	310	TRUE	TRUE	TRUE		FALSE	FALSE	null	null	100	99.9	65.2	86.2	100	193.12	190628_TT1_Hclass_Aging_038_47_24M_GF_F_Kidney_3_Pos	862.55969:3930 863.56304:2806 864.5664:1189	121.10262:10 141.07175:12 151.15016:12 171.10889:12 184.07072:36 361.27914:60 361.29514:24 363.28488:513 380.70419:10 385.27905:301 387.27292:24 387.28119:84 585.50287:12 673.5155:24 783.43597:10 827.49591:10 862.5481:36	2.11163	6.03667	1.89035	3.20067	2.70618	1.97612	2.92019	2.5392	6.92454	4.67693	5.70252	3.62254	2.49729	5.21945	3.85053	5.03266	4.85103	4.4788
5995	8.927	862.625	Hex2Cer 34:1;2O|Hex2Cer 18:1;2O/16:0	[M+H]+		0.536	TRUE	8.96	862.625	C46H87NO13	Hex2Cer	HLIJNIKSBCIDGO-UHFFFAOYSA-N	O=C(NC(COC1OC(CO)C(OC2OC(CO)C(O)C(O)C2O)C(O)C1O)C(O)C=CCCCCCCCCCCCCC)CCCCCCCCCCCCCCC	310	TRUE	TRUE	TRUE		FALSE	FALSE	null	null	100	100	81.4	86.3	100	3392.81	190628_TT1_Hclass_Aging_021_5_12M_SPF_M_Kidney_2_Pos	862.62567:66566 863.62902:62620 864.63238:46658	71.07116:10 82.06533:24 127.03432:12 145.05183:12 184.06998:277 207.20909:10 247.22377:12 247.24142:48 252.26848:271 256.24658:12 256.26007:142 264.27106:4172 265.26425:60 280.27286:12 282.28021:437 348.28116:12 436.46103:10 444.33493:36 478.33725:10 490.49567:219 500.87036:12 502.49524:961 504.504:149 518.80865:24 520.50714:4609 521.50317:66 536.7569:12 538.51703:230 655.56781:24 664.54053:24 68…	0.45588	62.43	0.565607	11.1184	0.626444	0.49692	0.922803	0.553448	244.14	68.1589	166.523	0.768757	0.543973	148.218	0.673915	117.626	40.7657	88.9324
6004	14.647	862.784	TG 51:2|TG 16:0_17:1_18:1	[M+NH4]+		0.893	TRUE	14.46	862.786	C54H100O6	TG	QLIUVBJPQMDRHV-UHFFFAOYSA-N	O=C(OCC(OC(=O)CCCCCCCC=CCCCCCCC)COC(=O)CCCCCCCCCCCCCCC)CCCCCCCC=CCCCCCCCC	310	TRUE	TRUE	TRUE		FALSE	FALSE	null	null	100	99.5	68	95.4	100	376.08	190628_TT1_Hclass_Aging_037_13_9w_GF_M_Kidney_1_Pos	862.78418:1966 863.78753:1898 864.79089:943	73.06359:5 83.08367:5 95.08766:18 105.86752:5 123.1091:12 135.11636:12 237.04391:5 239.23306:18 549.50714:18 561.47205:12 563.492:197 565.51898:68 575.43915:6 575.48962:55 577.49078:30 577.50092:281 589.51306:246 591.50433:12 591.54187:44 603.50537:6 603.52954:51 603.54333:30 617.57465:12 669.26569:5 845.75153:12 862.77106:24 862.8205:30	0.581319	11.169	0.379888	4.62586	10.7972	5.97277	4.00632	0.618712	7.37946	13.7929	6.67362	11.4416	1.30498	16.2001	14.5823	20.8139	20.3838	51.5351
6005	15.43	862.823	TG O-52:2|TG O-18:1_16:0_18:1	[M+NH4]+		0.411	TRUE	15.25	862.822	C55H104O5	EtherTG	SRSFVHXSVPMBMY-UHFFFAOYSA-N	O=C(OCC(OC(=O)CCCCCCCC=CCCCCCCCC)COCCCCCCCCC=CCCCCCCCC)CCCCCCCCCCCCCCC	310	TRUE	TRUE	TRUE		FALSE	FALSE	null	null	100	99.7	70	87.3	100	86.51	190628_TT1_Hclass_Aging_040_25_9w_SPF_F_Kidney_1_Pos	862.82294:1219 863.82629:1201 864.82965:488	81.06879:4 97.10268:16 109.09535:4 109.09682:4 123.11368:4 153.11624:3 187.14847:3 203.04985:3 289.27103:4 307.3089:8 441.86575:3 446.03439:4 494.97137:3 525.19446:3 542.13391:8 549.49005:3 561.51129:4 563.5014:8 563.53473:122 565.51837:8 575.47888:4 577.51715:39 589.56012:121 590.53149:4 591.56512:16 597.99518:3 603.52539:8 674.8595:3 782.36365:3 845.75055:4	0.183669	3.09395	0.20875	0.881693	0.53586	0.44781	0.611104	0.233646	0.65888	0.659145	0.572359	0.647273	0.217689	0.732873	0.666827	1.36391	0.863369	2.55331
6009	13.835	863.689	CoQ10	[M+H]+	adduct linked to 6210_[M+NH4]+; adduct linked to 6257_[M+Na]+	0.946	TRUE	14.15	863.691	C59H90O4	CoQ	ACTIUHUUMQJHFO-UHFFFAOYSA-N	O=C1C(OC)=C(OC)C(=O)C(=C1C)CC=C(C)CCC=C(C)CCC=C(C)CCC=C(C)CCC=C(C)CCC=C(C)CCC=C(C)CCC=C(C)CCC=C(C)CCC=C(C)C	310	TRUE	TRUE	TRUE		FALSE	FALSE	null	null	100	98.8	68	87.6	100	682.7	190628_TT1_Hclass_Aging_025_36_24M_SPF_F_Kidney_5_Pos	863.69458:15070 864.69793:16767 865.70129:6220	93.06713:10 109.10628:24 131.07991:10 137.1324:24 163.1561:10 175.1496:12 177.1609:24 196.45348:12 197.07742:130 213.16135:12 231.20555:12 237.22466:10 263.1228:12 283.24542:10 441.31757:10 473.43088:10 522.80859:10 543.49133:10 561.40576:10 585.57483:10 640.2215:10 671.50427:12 827.80035:10 842.1983:10 863.64233:24 863.68768:120 863.71246:117	3.99293	2.90964	3.91928	2.95946	1.44919	1.04504	2.25248	3.8787	2.60483	3.40983	4.612	1.52454	5.62765	3.81166	1.73074	4.23553	1.07997	0.468463
6030	13.341	864.762	TG 50:2;1O|TG 16:0_16:0_18:2;1O	[M+NH4]+		0.929	TRUE	13.81	864.765	C53H98O7	OxTG	KXJVAWVASGQSKF-UHFFFAOYSA-N	O=C(OCC(OC(=O)CCCCCCCCCCCCCCC)COC(=O)CCCCCCC(O)C=CCC=CCCCCC)CCCCCCCCCCCCCCC	310	TRUE	TRUE	TRUE		FALSE	FALSE	null	null	100	97.3	38.1	88.7	100	508.31	190628_TT1_Hclass_Aging_030_3_9w_SPF_M_Kidney_3_Pos	864.76501:11229 865.76836:8735 866.77172:5114	71.08798:24 83.08824:12 85.10457:12 95.08166:48 135.11104:12 149.09372:24 159.11694:12 167.06184:10 201.15079:12 223.20319:10 231.20409:24 235.20464:60 239.23299:24 243.20145:24 243.21019:48 257.25247:12 261.21735:199 263.22824:48 265.24686:24 279.22473:48 291.22693:12 311.28:12 313.27856:101 317.23236:12 317.24487:36 339.28073:24 401.00122:10 475.42786:12 481.4465:36 499.46616:36 517.45288:24 54…	0.45558	9.66098	0.288782	3.00718	53.0781	49.1938	13.6638	1.04961	13.3911	4.69595	6.9176	69.427	2.32742	1.77745	124.372	8.23378	38.9239	36.4411
6031	13.591	864.764	TG 50:2;1O|TG 16:0_16:0_18:2;1O	[M+NH4]+		0.786	TRUE	13.81	864.765	C53H98O7	OxTG	KXJVAWVASGQSKF-UHFFFAOYSA-N	O=C(OCC(OC(=O)CCCCCCCCCCCCCCC)COC(=O)CCCCCCC(O)C=CCC=CCCCCC)CCCCCCCCCCCCCCC	310	TRUE	TRUE	TRUE		FALSE	FALSE	null	null	100	99.5	60.7	72.4	100	364.72	190628_TT1_Hclass_Aging_045_30_12M_SPF_F_Kidney_3_Pos	864.76294:22623 865.76629:21137 866.76965:9163	83.08507:24 107.08822:12 109.10288:36 117.06216:12 131.08252:12 135.10995:48 145.0968:36 147.12021:36 149.13536:24 151.14696:24 153.12515:36 161.12737:36 163.15347:12 167.14211:12 169.1563:24 183.13934:205 197.08228:36 217.18613:12 219.20699:24 229.20305:12 233.2206:48 237.18443:12 243.18845:12 243.20593:36 251.23415:140 257.25702:12 261.22421:48 263.23282:24 279.23404:366 297.23187:12 297.23911:…	0.572113	5.47488	0.369231	2.56835	23.5053	44.8403	8.4137	1.07432	5.00249	2.97435	3.13836	44.6896	2.88361	0.943058	94.6467	4.98421	15.5475	6.7046
6033	14.984	864.797	TG 51:1|TG 16:0_17:0_18:1	[M+NH4]+		0.643	TRUE	14.74	864.802	C54H102O6	TG	RHDRMOUSDQDVCE-UHFFFAOYSA-N	O=C(OCC(OC(=O)CCCCCCCCCCCCCCCC)COC(=O)CCCCCCCCCCCCCCC)CCCCCCCC=CCCCCCCCC	310	TRUE	TRUE	TRUE		FALSE	FALSE	null	null	100	99.2	74.4	93.5	100	104.89	190628_TT1_Hclass_Aging_021_5_12M_SPF_M_Kidney_2_Pos	864.80219:3688 865.80554:3409 866.8089:1441	265.21158:12 546.25836:10 549.49347:48 551.49182:48 551.51819:36 561.53143:12 563.51489:60 565.52521:275 577.5174:331 579.53564:24 591.53125:321 593.54993:24 605.54053:36 864.77557:48 864.82513:24	0.304244	2.49977	0.272901	1.63147	2.37788	2.56823	1.00525	0.248923	1.48623	1.93009	1.21407	2.84971	0.480152	2.4326	3.72612	4.11011	3.99695	6.85224
6052	13.762	866.722	TG 52:7|TG 16:0_14:1_22:6	[M+NH4]+		0.107	TRUE	13.73	866.723	C55H92O6	TG	XZYUVQHXKBQQRU-UHFFFAOYSA-N	O=C(OCC(OC(=O)CCCCCCCC=CCCCC)COC(=O)CCCCCCCCCCCCCCC)CCC=CCC=CCC=CCC=CCC=CCC=CCC	310	TRUE	TRUE	TRUE		FALSE	FALSE	null	null	100	100	42.2	80.9	100	175.6	190628_TT1_Hclass_Aging_027_15_9w_GF_M_Kidney_3_Pos	866.724:2096 867.72735:1903 868.73071:3072	95.07866:12 97.10195:24 107.08294:24 121.10194:10 140.10612:10 163.14542:12 169.10066:12 175.11253:10 187.14786:10 197.0775:12 203.17528:10 212.0423:10 245.21815:10 279.23105:10 283.23132:24 311.22723:12 311.24207:48 335.09293:10 349.24313:12 450.03537:10 516.20752:10 519.76831:10 521.45557:135 529.6615:10 545.47552:12 547.46326:60 549.48096:36 558.27167:10 573.48877:36 579.52277:10 593.45148:60 …	0.5061	5.04482	0.402873	2.57508	1.82155	1.82979	2.65532	0.829892	3.91992	2.15406	2.33539	3.5568	0.739141	3.51208	2.14917	4.45375	5.39692	12.341
6073	13.84	868.737	TG 52:6|TG 16:1_18:2_18:3	[M+NH4]+		0.589	TRUE	13.86	868.739	C55H94O6	TG	NOOJQDXMGLPOOA-UHFFFAOYSA-N	O=C(OCC(OC(=O)CCCCCCCC=CCC=CCCCCC)COC(=O)CCCCCCCC=CCCCCCC)CCCCCCCC=CCC=CCC=CCC	310	TRUE	TRUE	TRUE		FALSE	FALSE	null	null	100	100	70.9	93	100	542.01	190628_TT1_Hclass_Aging_QC_Pos_01	868.74249:3054 869.74584:3193 870.7492:4461	92.77599:10 111.1171:10 123.11856:24 131.09053:12 135.1132:24 137.13008:24 215.14565:12 235.20676:24 257.17578:10 261.21487:36 313.25809:12 317.25177:36 523.47839:24 547.43585:12 547.45557:36 551.48474:10 569.44214:24 571.45966:217 573.48407:274 575.51208:24 597.48352:237 599.48822:36 833.72211:24 851.69324:66 868.72247:48	0.782501	17.8974	0.603892	7.27431	14.4254	6.37758	6.51556	1.17048	19.4145	6.20908	11.6001	11.9051	1.48098	10.4934	11.451	25.6335	43.0102	174.016
6074	14.06	868.741	TG 52:6|TG 14:0_16:0_22:6	[M+NH4]+		0.464	TRUE	13.91	868.739	C55H94O6	TG	UXGPUQXLYDHGHO-UHFFFAOYSA-N	O=C(OCC(OC(=O)CCCCCCCCCCCCCCC)COC(=O)CCCCCCCCCCCCC)CCC=CCC=CCC=CCC=CCC=CCC=CCC	310	TRUE	TRUE	TRUE		FALSE	FALSE	null	null	100	99.7	67.6	83.7	100	623.79	190628_TT1_Hclass_Aging_046_22_24M_GF_M_Kidney_1_Pos	868.73822:5782 869.74157:4907 870.74493:16779	83.0874:24 85.10241:12 91.05112:24 109.09525:12 131.08055:12 131.08537:24 147.1181:10 159.11168:12 169.09561:24 201.16249:24 211.20766:24 223.15039:12 239.23682:36 269.18442:12 285.2467:12 293.21689:24 311.23434:48 313.27002:24 519.72833:10 523.46814:364 566.32843:10 595.461:122 623.49738:81 833.71729:12 851.70068:48 868.70935:60	2.3731	10.1745	2.37942	4.53365	3.85708	4.81173	4.59235	3.17444	8.3069	6.40208	5.99431	6.37874	2.79986	7.97276	4.21047	10.4505	9.14621	9.24923
6104	14.026	870.753	TG 52:5|TG 16:1_18:2_18:2	[M+NH4]+	similar chromatogram in higher mz_6498	0.786	TRUE	14.01	870.755	C55H96O6	TG	CQZAAIKPSLHIBC-UHFFFAOYSA-N	O=C(OCC(OC(=O)CCCCCCCC=CCC=CCCCCC)COC(=O)CCCCCCCC=CCCCCCC)CCCCCCCC=CCC=CCCCCC	310	TRUE	TRUE	TRUE		FALSE	FALSE	null	null	100	100	73.2	91.6	100	4262.65	190628_TT1_Hclass_Aging_018_24_24M_GF_M_Kidney_3_Pos	870.75323:194133 871.75658:183410 872.75994:109595	71.08403:48 73.06743:10 77.03355:24 79.05279:116 81.0691:434 83.08522:175 85.06009:36 91.0462:12 91.05557:79 93.07101:93 95.08524:322 97.06297:36 97.10168:79 99.07222:24 99.07781:70 105.07386:48 107.08409:109 109.10018:251 111.07888:36 111.11881:48 113.09176:12 119.0811:36 121.09851:342 123.11418:247 125.09155:36 129.05051:24 131.08604:48 133.09705:84 135.11356:256 137.12717:197 139.09938:12 139.…	4.67166	160.384	3.12812	57.3148	120.531	51.9207	42.1299	5.66906	162.078	43.7731	112.697	90.9792	9.30314	76.0284	98.6476	263.62	354.704	1685.99
6123	14.259	872.767	TG 52:4|TG 16:1_18:1_18:2	[M+NH4]+	adduct linked to 6175_[M+Na]+; similar chromatogram in higher mz_6510	0.964	TRUE	14.22	872.77	C55H98O6	TG	WHSWXEYWNPTUPW-UHFFFAOYSA-N	O=C(OCC(OC(=O)CCCCCCCC=CCCCCCCCC)COC(=O)CCCCCCCC=CCCCCCC)CCCCCCCC=CCC=CCCCCC	310	TRUE	TRUE	TRUE		FALSE	FALSE	null	null	100	100	89.5	96.6	100	15212.4	190628_TT1_Hclass_Aging_036_21_18M_GF_M_Kidney_5_Pos	872.76965:440358 873.773:365871 874.77636:162744	71.04845:48 71.0863:146 73.06253:10 77.03837:36 79.05394:103 81.07026:731 83.08639:372 85.05998:36 85.09752:48 91.0501:12 93.06954:221 95.07555:12 95.08376:729 97.06423:80 97.10018:299 99.07769:138 105.06942:79 107.08106:137 109.09859:487 111.08022:83 111.11572:164 113.09461:60 119.0825:48 121.09065:12 121.09991:752 123.11715:261 125.13064:68 127.113:36 133.09851:184 135.11504:711 137.13193:473 1…	25.0281	679.136	15.0208	262.409	622.182	348.46	205.367	28.8961	683.988	204.933	490.485	517.592	66.0309	318.081	644.752	1064.42	1595.3	6069.14
6124	13.316	872.768	TG 52:4|TG 16:1_18:1_18:2	[M+NH4]+		0.107	TRUE	14.22	872.77	C55H98O6	TG	WHSWXEYWNPTUPW-UHFFFAOYSA-N	O=C(OCC(OC(=O)CCCCCCCC=CCCCCCCCC)COC(=O)CCCCCCCC=CCCCCCC)CCCCCCCC=CCC=CCCCCC	410	TRUE	TRUE	TRUE		FALSE	FALSE	null	null	100	91.2	69.1	92.8	100	251.04	190628_TT1_Hclass_Aging_018_24_24M_GF_M_Kidney_3_Pos	872.76782:12517 873.77117:9442 874.77453:16861	79.04905:6 81.07037:24 86.90635:5 109.09432:6 109.10312:18 111.12029:12 119.07957:6 119.0811:12 121.10623:6 123.1204:12 135.11682:33 149.13231:12 151.14734:12 157.14868:5 161.1349:6 165.15843:12 175.13802:6 184.07719:30 185.12766:5 193.15501:12 219.21385:12 235.20979:6 237.21754:30 245.21744:18 247.24751:18 261.22498:12 263.23819:69 265.23853:12 265.24997:30 269.22742:5 307.31021:5 311.26343:24 3…	0.216226	8.88572	0.135614	2.0777	3.10353	2.62606	2.65964	0.350918	8.3536	2.64204	4.2037	3.99045	0.447344	4.21164	4.04377	8.02663	23.3832	108.707
6125	14.479	872.773	TG 52:4|TG 16:0_16:0_20:4	[M+NH4]+	adduct linked to 6512_[M+ACN+Na]+	0.036	TRUE	14.29	872.77	C55H98O6	TG	GTEUKLVYQXBQGG-UHFFFAOYSA-N	O=C(OCC(OC(=O)CCCCCCCCCCCCCCC)COC(=O)CCCCCCCCCCCCCCC)CCCCCCC=CCC=CCC=CCC=CCC	310	TRUE	TRUE	TRUE		FALSE	FALSE	null	null	100	99.6	65.8	90	100	2751.01	190628_TT1_Hclass_Aging_003_27_9w_SPF_F_Kidney_3_Pos	872.76996:31756 873.77331:35133 874.77667:103772	71.08448:60 81.06578:24 81.06957:60 83.08314:36 85.0994:36 91.05205:48 95.08027:36 97.09804:36 103.63241:10 109.09925:48 117.06905:48 119.08472:88 131.0834:36 133.10248:60 135.1125:36 137.12775:36 145.10283:36 147.11269:60 151.14967:24 157.0983:36 161.12663:60 167.13593:10 171.11391:69 173.12598:36 175.1461:63 177.16113:48 185.1226:24 185.12833:89 187.14799:48 189.16124:108 191.17557:36 194.73657…	8.2761	14.7397	6.63571	27.2679	13.216	15.9135	10.967	5.74589	16.6455	11.9083	14.7418	16.8419	7.12663	12.2288	17.77	44.8531	33.2483	41.7388
6147	13.159	874.738	HexCer 44:0;4O|HexCer 20:0;3O/24:0;(2OH)	[M+H]+		0.143	TRUE	13.08	874.734	C50H99NO10	HexCer_AP	LFEYXCVBYKQPHV-UHFFFAOYSA-N	O=C(NC(COC1OC(CO)C(O)C(O)C1O)C(O)C(O)CCCCCCCCCCCCCCCC)C(O)CCCCCCCCCCCCCCCCCCCCCC	310	TRUE	TRUE	TRUE		FALSE	FALSE	null	null	100	99.9	53.4	90.8	100	207.33	190628_TT1_Hclass_Aging_005_33_18M_SPF_F_Kidney_3_Pos	874.7381:13618 875.74145:23599 876.74481:12149	80.05067:48 124.11937:10 184.06445:12 221.1508:24 245.22244:24 263.22516:12 265.24146:36 285.24191:10 292.29492:36 310.28946:12 310.30676:119 319.17111:10 328.30771:36 426.38266:36 531.45111:10 545.45813:24 549.49969:24 564.49091:24 566.48291:12 572.47339:36 574.48279:48 575.48877:196 576.50244:36 577.51361:118 578.52228:36 589.47821:24 591.48309:24 601.51038:107 602.5191:24 603.51837:88 603.5355…	3.61273	3.19687	2.88111	3.56928	16.8929	3.67486	3.77927	0.720034	2.82539	3.76156	2.25073	4.03638	3.90142	2.21047	8.43579	3.92241	4.51359	1.4489
6148	14.533	874.786	TG 52:3|TG 16:0_18:1_18:2	[M+NH4]+	adduct linked to 6202_[M+Na]+; adduct linked to 6526_[M+ACN+Na]+	1	TRUE	14.42	874.786	C55H100O6	TG	KGLAHZTWGPHKFF-UHFFFAOYSA-N	O=C(OCC(OC(=O)CCCCCCCC=CCCCCCCCC)COC(=O)CCCCCCCCCCCCCCC)CCCCCCCC=CCC=CCCCCC	310	TRUE	TRUE	TRUE		FALSE	FALSE	null	null	100	99.8	93	96.4	100	26160.5	190628_TT1_Hclass_Aging_047_1_9w_SPF_M_Kidney_1_Pos	874.78601:644079 875.78936:598438 876.79272:224558	71.085:244 72.56431:10 77.04316:12 79.0513:142 81.06885:865 83.08368:405 85.10253:230 91.0526:24 93.068:155 95.08493:879 97.06403:48 97.10275:350 99.1138:60 105.07063:48 107.08664:106 109.10129:536 111.07703:60 111.1214:235 113.12869:24 119.0853:48 121.10119:317 123.1122:372 125.12879:94 127.10955:48 131.08398:24 133.09497:128 135.11636:502 137.09711:36 137.12997:334 139.1138:36 141.12354:48 141.…	58.1664	1056.73	39.4093	469.5	1189.25	926.281	409.816	70.3269	1077.62	405.783	796.46	1165.28	183.588	495.933	1845.03	1651.59	2770.29	7281.93
6149	13.303	874.786	TG 52:3|TG 16:0_18:1_18:2	[M+NH4]+		0.107	TRUE	14.42	874.786	C55H100O6	TG	KGLAHZTWGPHKFF-UHFFFAOYSA-N	O=C(OCC(OC(=O)CCCCCCCC=CCCCCCCCC)COC(=O)CCCCCCCCCCCCCCC)CCCCCCCC=CCC=CCCCCC	410	TRUE	TRUE	TRUE		FALSE	FALSE	null	null	100	86.4	79.5	96.3	100	436.67	190628_TT1_Hclass_Aging_026_2_9w_SPF_M_Kidney_2_Pos	874.7887:7661 875.79205:6483 876.79541:8487	74.06279:10 80.04782:48 81.07172:12 97.09902:24 184.06218:12 184.06979:118 239.23627:24 245.2265:24 257.24457:10 263.23621:48 265.25253:24 313.27469:36 339.27924:36 545.45477:12 549.46344:24 551.51123:24 557.44867:24 573.46075:24 573.49438:48 574.47601:36 575.44501:23 575.49884:1837 576.49902:48 577.53046:1414 578.54248:36 600.51624:36 601.52069:1638 603.50116:98 603.53217:380 839.77539:24 857.73…	0.269441	11.6996	0.140212	2.72988	3.19097	4.15188	3.93544	0.451116	10.2969	3.34944	5.04762	5.78914	0.520679	4.94927	6.81921	10.3295	33.6989	112.702
6168	13.034	876.729	TG 50:4;2O|TG 16:0_16:1_18:3;2O	[M+NH4]+	adduct linked to 6540_[M+Na]+	0.607	TRUE	13.4	876.729	C53H94O8	OxTG	OPDJIMMVCQOBOP-UHFFFAOYSA-N	O=C(OCC(OC(=O)CCCCCCCC=CCCCCCC)COC(=O)CCCCCC(O)C(O)C=CCC=CCC=CCC)CCCCCCCCCCCCCCC	310	TRUE	TRUE	TRUE		FALSE	FALSE	null	null	100	98.4	57.5	80.7	100	240.69	190628_TT1_Hclass_Aging_039_41_12M_GF_F_Kidney_2_Pos	876.72925:19606 877.7326:18668 878.73596:21681	71.08507:60 81.06389:12 81.06768:24 83.08378:24 85.10004:24 99.07622:12 109.0648:24 119.08699:12 121.09673:24 135.11491:24 141.12373:12 149.13373:36 161.13103:24 171.09641:24 177.162:12 184.06161:12 184.07114:102 185.07576:24 191.14735:24 195.13713:24 219.21552:36 237.2171:36 239.2399:36 247.20512:24 263.21948:12 265.2106:24 267.25284:12 275.19739:115 289.13809:10 291.19366:48 293.20844:857 294.2…	0.176933	6.31805	0.135197	1.55272	22.8243	10.7801	4.62174	0.574679	9.32608	2.27332	3.45922	19.8262	0.774264	0.806636	33.1611	5.28429	20.1258	16.9265
6169	13.285	876.798	TG 52:2|TG 16:0_18:1_18:1	[M+NH4]+	ion correlated with 6155; adduct linked to 6545_[M+ACN+Na]+	0.214	TRUE	14.65	876.802	C55H102O6	TG	JFISYPWOVQNHLS-UHFFFAOYSA-N	O=C(OCC(OC(=O)CCCCCCCC=CCCCCCCCC)COC(=O)CCCCCCCCCCCCCCC)CCCCCCCC=CCCCCCCCC	410	TRUE	TRUE	TRUE		FALSE	FALSE	null	null	100	79.6	64	90.9	100	152.8	190628_TT1_Hclass_Aging_033_12_24M_SPF_M_Kidney_5_Pos	876.79767:6623 877.80102:4017 878.80438:1727	83.05808:12 85.10121:24 135.10652:10 184.07076:12 239.2372:36 265.24429:36 265.25345:60 339.2774:12 339.28519:24 549.49005:24 573.48114:12 575.49567:60 576.49585:60 577.51373:706 578.51904:60 579.52185:36 602.51923:48 603.52191:355 604.53235:60 605.51947:36 859.79266:24 876.70703:24 876.79846:98	0.237108	6.73538	0.106778	1.50965	2.44486	3.57061	2.67693	0.370688	5.27938	2.73035	3.05731	4.94961	0.419168	2.72844	7.28328	5.21847	18.6983	46.4546
6170	14.849	876.799	TG 52:2|TG 16:0_18:1_18:1	[M+NH4]+	adduct linked to 6544_[M+H]+; adduct linked to 6227_[M+Na]+; similar chromatogram in higher mz_6544	1	TRUE	14.65	876.802	C55H102O6	TG	JFISYPWOVQNHLS-UHFFFAOYSA-N	O=C(OCC(OC(=O)CCCCCCCC=CCCCCCCCC)COC(=O)CCCCCCCCCCCCCCC)CCCCCCCC=CCCCCCCCC	310	TRUE	TRUE	TRUE		FALSE	FALSE	null	null	100	99.6	90.5	89.7	100	19078.7	190628_TT1_Hclass_Aging_021_5_12M_SPF_M_Kidney_2_Pos	876.80249:991772 877.80584:893849 878.8092:292164	71.04751:60 71.08418:482 77.03616:24 79.0542:185 81.068:964 83.08411:941 85.06156:48 85.09909:340 91.04773:24 93.06849:305 95.08133:1075 97.06178:70 97.09773:892 99.07662:86 99.11293:72 101.08816:24 105.06688:24 107.07851:36 107.08286:217 109.09895:821 111.07911:48 111.1146:498 113.13229:60 117.73009:10 121.09876:706 123.11443:452 125.13105:165 127.14505:48 135.11385:984 137.13074:428 139.10796:1…	56.3073	620.077	34.4406	320.71	798.449	905.624	312.859	52.9361	534.714	327.792	510.566	979.264	168.14	281.212	1881.07	1044.95	1587.47	3091
6171	14.86	876.835	TG O-53:2|TG O-17:0_18:1_18:1	[M+NH4]+		0.036	TRUE	15.44	876.838	C56H106O5	EtherTG	SJGFKBGOOQCLCK-UHFFFAOYSA-N	O=C(OCC(OC(=O)CCCCCCCC=CCCCCCCCC)COCCCCCCCCCCCCCCCCC)CCCCCCCC=CCCCCCCCC	410	TRUE	TRUE	TRUE		FALSE	FALSE	null	null	100	95.4	89.5	89.3	100	638.52	190628_TT1_Hclass_Aging_016_6_12M_SPF_M_Kidney_3_Pos	876.83521:9004 877.83856:36920 878.84192:33342	71.08298:355 77.03861:24 77.5345:10 79.05418:110 81.06925:775 83.08409:684 85.06413:60 85.10037:254 91.06109:24 93.06711:155 95.08404:1150 97.06314:36 97.10047:566 99.07939:36 99.11291:60 107.08138:154 109.10038:756 111.0776:36 111.11605:407 113.09047:24 121.10182:696 123.11751:385 125.09334:36 125.12944:83 127.0849:12 127.10388:36 133.09727:24 135.11543:1044 137.13069:328 139.10791:119 141.15929…	0.470399	5.15233	0.23487	1.80242	5.14277	6.29751	1.74255	0.704083	3.91492	2.27241	2.69385	7.50452	1.27873	2.54047	15.4046	8.71584	15.348	32.3072
6192	13.207	878.747	TG 50:3;2O|TG 16:0_16:0_18:3;2O	[M+NH4]+		0.732	TRUE	13.58	878.744	C53H96O8	OxTG	YXJXGXIVJTXRSR-UHFFFAOYSA-N	O=C(OCC(OC(=O)CCCCCCCCCCCCCCC)COC(=O)CCCCCC(O)C(O)C=CCC=CCC=CCC)CCCCCCCCCCCCCCC	310	TRUE	TRUE	TRUE		FALSE	FALSE	null	null	100	98.4	68.7	85.6	100	311.18	190628_TT1_Hclass_Aging_048_40_12M_GF_F_Kidney_1_Pos	878.74567:5368 879.74902:5871 880.75238:7556	95.08647:12 184.07492:24 239.23331:24 275.18329:12 275.19958:36 293.20828:374 313.27359:36 353.26743:12 355.06305:24 549.47455:24 550.47821:24 551.50909:428 573.4754:36 575.48657:24 577.52484:66 578.50989:36 579.5296:48 580.54004:10 587.46759:36 603.53674:24 605.47559:875 605.52734:59 618.50287:10 633.48627:24 843.70868:98 861.68774:24 878.70801:24	0.381483	6.48781	0.49983	3.82628	76.9574	24.2232	4.60964	0.855952	6.51708	2.52369	3.08823	28.6167	1.76699	1.12152	48.9307	4.93775	15.7092	10.6735
6195	15.251	878.819	TG 52:1|TG 16:0_18:0_18:1	[M+NH4]+	adduct linked to 6566_[M+ACN+Na]+; adduct linked to 6243_[M+Na]+	0.946	TRUE	14.91	878.817	C55H104O6	TG	NPCZZYKITFKRQZ-UHFFFAOYSA-N	O=C(OCC(OC(=O)CCCCCCCCCCCCCCCCC)COC(=O)CCCCCCCCCCCCCCC)CCCCCCCC=CCCCCCCCC	310	TRUE	TRUE	TRUE		FALSE	FALSE	null	null	100	98.6	90.7	95.6	100	1411	190628_TT1_Hclass_Aging_026_2_9w_SPF_M_Kidney_2_Pos	878.81708:91471 879.82043:81433 880.82379:25960	77.03723:12 81.06909:103 83.08265:48 83.64764:10 85.09891:36 93.06423:12 95.08523:140 97.10167:60 109.10017:83 111.11436:84 114.33666:10 121.10467:12 133.10188:12 135.11842:60 137.13206:60 149.12715:36 149.134:60 151.14732:89 165.16202:48 177.16045:12 221.08131:12 239.23816:188 247.22763:12 247.24529:95 256.26172:24 265.25452:270 267.26019:88 311.25845:12 313.2619:24 313.27679:114 339.284:24 341.…	9.4549	16.7232	6.09826	27.4819	46.4654	138.397	14.893	3.78327	13.698	12.7832	14.5087	67.859	22.627	10.3594	192.677	23.1825	49.1261	29.9449
6196	15.193	878.834	TG 52:1|TG 16:0_18:0_18:1	[M+NH4]+	adduct linked to 6566_[M+ACN+Na]+	0.054	TRUE	14.91	878.817	C55H104O6	TG	NPCZZYKITFKRQZ-UHFFFAOYSA-N	O=C(OCC(OC(=O)CCCCCCCCCCCCCCCCC)COC(=O)CCCCCCCCCCCCCCC)CCCCCCCC=CCCCCCCCC	310	TRUE	TRUE	TRUE		FALSE	FALSE	null	null	100	99	86.3	94.7	100	612.59	190628_TT1_Hclass_Aging_025_36_24M_SPF_F_Kidney_5_Pos	878.83392:4120 879.83727:4316 880.84063:2423	81.06421:6 83.07899:6 95.08544:30 109.09456:12 111.11462:12 123.11757:18 135.0992:6 143.14182:5 151.14772:12 239.2345:59 263.2298:5 265.24841:68 267.26328:24 293.28433:5 313.26532:18 332.29388:5 549.47443:12 551.50244:61 577.52148:524 579.53973:577 580.52991:12 605.54474:559 607.55945:12 633.58539:18 843.40411:6 878.82159:62	2.80196	7.20365	2.05428	8.87818	15.6069	39.1003	3.56031	1.58744	5.27772	3.60254	4.93899	13.5479	5.90965	3.44783	55.4413	6.56689	20.8585	11.3683
6197	14.847	878.836	TG O-53:1|TG O-19:1_16:0_18:0	[M+NH4]+		0.036	TRUE	15.88	878.854	C56H108O5	EtherTG	HEIHFCIAEGUOQL-UHFFFAOYSA-N	O=C(OCC(OC(=O)CCCCCCCCCCCCCCCCC)COCCCCCCCCC=CCCCCCCCCC)CCCCCCCCCCCCCCC	410	TRUE	TRUE	TRUE		FALSE	FALSE	null	null	98.8	87.1	37.6	89.2	100	345.54	190628_TT1_Hclass_Aging_019_17_12M_GF_M_Kidney_2_Pos	878.83691:3632 879.84026:2723 880.84362:935	139.15047:10 239.23787:24 265.24506:12 265.25647:36 339.28622:12 549.50507:24 551.51331:36 575.49762:48 576.49445:24 577.52246:151 578.52106:315 579.5238:295 580.54102:36 581.53882:24 603.51019:36 603.52057:65 604.54132:201 605.54913:178 607.54309:24 843.68994:10 861.78424:36 878.80127:78	0.808772	6.79904	0.46368	3.05766	8.8603	11.5748	3.03045	0.871679	5.64469	3.25112	5.22309	9.3908	1.91752	2.63009	20.9285	13.2848	17.9209	33.6012
6214	13.146	880.759	TG 50:2;2O|TG 16:0_16:0_18:2;2O	[M+NH4]+		0.393	TRUE	13.65	880.76	C53H98O8	OxTG	ABMDRUJBZQOQQS-UHFFFAOYSA-N	O=C(OCC(OC(=O)CCCCCCCCCCCCCCC)COC(=O)CCCCCC(O)C(O)C=CCC=CCCCCC)CCCCCCCCCCCCCCC	410	TRUE	TRUE	TRUE		FALSE	FALSE	null	null	100	96.8	47.6	87.7	100	390.81	190628_TT1_Hclass_Aging_006_39_9w_GF_F_Kidney_3_Pos	880.75861:26165 881.76196:19918 882.76532:8497	73.04388:24 81.06578:24 83.08185:60 85.10198:24 95.08437:48 97.1008:24 109.09632:24 111.07941:12 117.06904:24 123.11785:24 135.11414:48 137.13103:24 145.09438:12 147.11607:48 149.13292:48 151.10828:84 155.11548:24 159.11317:12 161.13197:48 163.10974:60 165.12482:48 175.1424:36 179.14073:48 197.07762:84 201.15636:12 205.19043:12 209.01292:24 215.17596:24 217.19781:24 221.07581:24 223.05597:90 225.…	0.450191	9.03144	0.886405	3.86936	48.0358	38.7978	6.97799	0.900435	9.73475	3.37038	4.47108	45.6103	2.13367	2.13041	79.0663	5.90575	28.8764	25.2899
6216	15.737	880.831	TG 52:0|TG 16:0_18:0_18:0	[M+NH4]+	adduct linked to 6259_[M+Na]+; adduct linked to 6587_[M+ACN+Na]+	1	TRUE	15.39	880.833	C55H106O6	TG	SDNYRTVJOFMYIW-UHFFFAOYSA-N	O=C(OCC(OC(=O)CCCCCCCCCCCCCCCCC)COC(=O)CCCCCCCCCCCCCCCCC)CCCCCCCCCCCCCCC	310	TRUE	TRUE	TRUE		FALSE	FALSE	null	null	100	98.6	88.8	90.6	100	545.31	190628_TT1_Hclass_Aging_018_24_24M_GF_M_Kidney_3_Pos	880.8327:13464 881.83605:11101 882.83941:3656	71.08299:27 81.06927:18 83.079:5 83.08667:15 85.09909:24 93.05901:1 95.08543:31 97.09911:16 99.11712:2 109.10041:22 111.11755:9 113.1293:4 120.96908:1 123.11287:8 125.12947:2 127.14663:2 137.134:11 139.14766:4 151.1442:5 153.99004:1 165.15877:6 169.19542:2 176.09973:1 179.17799:6 193.19246:2 221.2216:5 239.23431:61 249.25102:10 250.87968:1 256.26901:6 257.24255:2 267.27225:46 284.29233:8 285.2750…	2.37018	10.2481	2.64333	3.52341	22.5657	15.1395	7.32892	4.28965	15.5629	8.42504	8.52104	16.9551	4.8845	9.69073	19.2118	7.22319	28.7044	116.931
6217	15.314	880.834	TG 52:0|TG 16:0_18:0_18:0	[M+NH4]+		0.018	TRUE	15.39	880.833	C55H106O6	TG	SDNYRTVJOFMYIW-UHFFFAOYSA-N	O=C(OCC(OC(=O)CCCCCCCCCCCCCCCCC)COC(=O)CCCCCCCCCCCCCCCCC)CCCCCCCCCCCCCCC	310	TRUE	TRUE	TRUE		FALSE	FALSE	null	null	100	99.9	28.9	89.9	100	328.96	190628_TT1_Hclass_Aging_004_14_9w_GF_M_Kidney_2_Pos	880.83417:5051 881.83752:1762 882.84088:535	85.09688:24 193.19281:10 239.23245:36 248.25323:10 265.24393:24 293.27472:10 327.30191:10 551.48523:24 552.49066:70 553.49048:24 574.55035:10 577.51727:82 578.51581:202 579.52197:297 580.53241:274 581.54034:253 605.50238:12 605.53693:48 605.55762:109 606.54559:205 607.55164:289 845.63696:10 880.78003:36 880.8175:60	1.10403	2.26635	0.74076	3.39957	0.496787	15.9432	1.94136	0.638482	2.19682	1.83177	1.98278	8.84179	2.82996	1.5633	21.165	3.21568	7.76688	7.64255
6218	15.232	880.835	TG 52:0|TG 16:0_18:0_18:0	[M+NH4]+	ion correlated with 6566	0.071	TRUE	15.39	880.833	C55H106O6	TG	SDNYRTVJOFMYIW-UHFFFAOYSA-N	O=C(OCC(OC(=O)CCCCCCCCCCCCCCCCC)COC(=O)CCCCCCCCCCCCCCCCC)CCCCCCCCCCCCCCC	310	TRUE	TRUE	TRUE		FALSE	FALSE	null	null	100	99.8	29.1	92.2	100	156.55	190628_TT1_Hclass_Aging_009_20_18M_GF_M_Kidney_3_Pos	880.83612:1200 881.83947:659 882.84283:414	95.08342:3 97.10122:4 147.11501:3 165.15976:3 211.96971:3 239.23991:4 262.25064:4 265.25412:8 311.31503:3 314.27066:8 446.01831:4 449.34943:3 488.12:3 495.43549:4 507.16943:3 532.83246:3 551.48413:4 551.51379:12 557.21942:8 557.25586:12 577.4859:4 578.50134:16 578.50806:39 579.51086:67 580.53143:40 581.53595:58 599.4776:4 605.54633:12 606.54114:42 607.55066:47 675.09955:3 787.35193:3 793.44281:4 …	1.00928	2.30737	0.760193	3.39957	5.95214	13.6182	1.84887	0.63309	2.00166	1.40842	1.98278	7.22895	2.49108	1.45543	20.0814	3.27473	7.39883	7.4428
6219	14.829	880.836	TG 52:0|TG 16:0_18:0_18:0	[M+NH4]+		0.054	TRUE	15.39	880.833	C55H106O6	TG	SDNYRTVJOFMYIW-UHFFFAOYSA-N	O=C(OCC(OC(=O)CCCCCCCCCCCCCCCCC)COC(=O)CCCCCCCCCCCCCCCCC)CCCCCCCCCCCCCCC	410	TRUE	TRUE	TRUE		FALSE	FALSE	null	null	100	96.2	20.2	86.4	100	95.61	190628_TT1_Hclass_Aging_048_40_12M_GF_F_Kidney_1_Pos	880.83649:1612 881.83984:672 882.8432:343	83.08354:10 233.21994:10 266.25946:36 549.4989:24 551.50055:187 577.50934:439 578.51801:102 579.52753:176 580.53119:161 581.54248:106 595.45416:12 604.53125:36 605.53906:102 606.55115:151 607.52606:60 607.55029:99 608.5675:36 616.00116:10 623.50787:36 862.78479:48 880.80664:64	0.12529	1.16713	0.0875539	0.522959	1.0587	1.84017	0.576529	0.142883	0.89908	0.580849	0.673461	1.99522	0.370149	0.498893	3.72612	1.58655	3.05103	5.40189
6246	7.774	884.546	BMP 44:12|BMP 22:6_22:6	[M+NH4]+	adduct linked to 6285_[M+H]+; adduct linked to 6055_[M+H]+	0.946	TRUE	7.78	884.544	C50H75O10P	BMP	FMHFZIDTIQEZJJ-UHFFFAOYSA-N	O=C(OC(CO)COP(=O)(O)OCC(OC(=O)CCC=CCC=CCC=CCC=CCC=CCC=CCC)CO)CCC=CCC=CCC=CCC=CCC=CCC=CCC	310	TRUE	TRUE	TRUE		FALSE	FALSE	null	null	100	100	73.8	68.7	100	4758.27	190628_TT1_Hclass_Aging_046_22_24M_GF_M_Kidney_1_Pos	884.54382:83559 885.54717:84966 886.55053:25624	77.03098:12 77.03714:48 79.05269:173 81.06647:242 83.08255:36 91.0541:317 93.06951:279 95.08099:124 97.06419:36 105.06649:150 107.08681:107 109.09706:60 113.05873:24 117.06221:24 117.06677:82 119.08088:230 121.09983:117 123.1155:24 128.05434:24 129.05504:96 129.06461:120 131.07454:24 131.08096:197 133.10001:163 135.07741:60 135.1133:113 141.0654:48 143.08241:110 145.09856:239 147.07773:60 147.118…	41.1802	168.035	39.5381	42.6995	41.2875	37.1187	34.6661	55.5129	146.151	95.4173	105.332	55.0633	65.3401	106.233	44.4545	120.565	71.1376	94.6785
6252	14.167	884.771	TG 53:5|TG 17:1_18:2_18:2	[M+NH4]+		0.304	TRUE	14.09	884.77	C56H98O6	TG	QHYAATSKYBYSLG-UHFFFAOYSA-N	O=C(OCC(OC(=O)CCCCCCCC=CCC=CCCCCC)COC(=O)CCCCCCCC=CCCCCCCC)CCCCCCCC=CCC=CCCCCC	310	TRUE	TRUE	TRUE		FALSE	FALSE	null	null	100	99.9	50.7	86.3	100	141.76	190628_TT1_Hclass_Aging_010_8_18M_SPF_M_Kidney_3_Pos	884.77026:1911 885.77361:2457 886.77697:2090	85.06221:10 95.08477:12 162.13705:10 185.07954:10 225.17232:10 294.22604:10 325.28082:12 525.48022:10 538.47723:24 551.47156:12 561.48438:24 573.47076:12 573.48425:24 584.16876:10 585.48535:60 587.48346:107 587.51062:123 589.50195:48 597.50439:12 599.49194:104 599.51599:91 601.51379:36 607.54437:10 613.50427:36 617.33679:10 790.97144:10 799.64539:24 800.26453:24 867.73657:36 884.34467:12 884.7453…	0.141007	2.52382	0.103435	1.22091	1.92575	1.16697	0.719149	0.183322	2.27689	1.73982	1.69201	1.98454	0.250111	4.1236	1.89911	4.77029	4.97383	25.2031
6262	7.963	886.56	BMP 44:11|BMP 22:5_22:6	[M+NH4]+	adduct linked to 6305_[M+H]+	0.857	TRUE	7.97	886.559	C50H77O10P	BMP	KMKVIBWZOQACES-UHFFFAOYSA-N	O=C(OC(CO)COP(=O)(O)OCC(OC(=O)CCCCCC=CCC=CCC=CCC=CCC=CCC)CO)CCC=CCC=CCC=CCC=CCC=CCC=CCC	310	TRUE	TRUE	TRUE		FALSE	FALSE	null	null	100	100	72.9	87.7	100	517.39	190628_TT1_Hclass_Aging_009_20_18M_GF_M_Kidney_3_Pos	886.55896:11356 887.56231:12205 888.56567:4492	81.0724:24 91.05239:24 93.07185:24 105.06326:12 105.06758:24 119.08975:24 124.06986:10 131.08067:36 133.10458:12 141.06512:24 141.08846:12 143.08383:12 145.10167:48 147.11661:24 155.08458:24 157.08655:12 157.09886:24 169.1069:12 171.11269:24 181.09985:12 185.12517:24 187.1429:24 201.15906:24 203.1841:36 211.15524:12 225.16785:24 269.22913:12 293.22522:24 311.22818:12 313.25888:24 361.26932:12 385…	3.77989	10.4944	5.61417	5.28786	5.07661	3.77148	4.10884	5.43123	11.0056	9.92028	9.86366	7.76088	6.92044	8.43919	7.81491	8.39604	9.18589	8.62584
6266	13.313	886.753	TG 52:5;1O|TG 16:1_18:2_18:2;1O	[M+NH4]+	adduct linked to 6090_[M+H]+	0.946	TRUE	13.68	886.749	C55H96O7	OxTG	VWAXTIWONRAZET-UHFFFAOYSA-N	O=C(OCC(OC(=O)CCCCCCCC=CCC=CCCCCC)COC(=O)CCCCCCC(O)C=CCC=CCCCCC)CCCCCCCC=CCCCCCC	310	TRUE	TRUE	TRUE		FALSE	FALSE	null	null	100	98.4	27.6	74.7	100	675.92	190628_TT1_Hclass_Aging_021_5_12M_SPF_M_Kidney_2_Pos	886.74835:7229 887.7517:6856 888.75506:5674	97.09914:24 99.08503:12 123.11136:12 133.10384:12 135.11551:36 149.13438:24 157.09805:10 173.13683:12 179.1405:63 184.06813:24 185.13766:12 205.18219:12 217.18315:12 231.19911:12 261.21884:12 263.23883:24 275.2009:12 277.21109:309 279.23795:36 311.24936:12 313.28259:24 319.26151:12 337.26932:36 339.29523:24 351.22559:12 351.25189:36 549.49054:24 571.47076:24 573.48846:77 574.47681:24 575.49634:49…	0.424594	18.7108	0.332663	4.70999	40.156	16.4978	12.2558	1.23113	23.1726	6.17812	11.7664	43.2882	1.8905	3.40262	47.6962	23.2522	53.2365	63.1292
6269	14.404	886.784	TG 53:4|TG 17:1_18:1_18:2	[M+NH4]+	adduct linked to 6632_[M+ACN+Na]+	0.857	TRUE	14.39	886.786	C56H100O6	TG	VESVDAJIPQIOEH-UHFFFAOYSA-N	O=C(OCC(OC(=O)CCCCCCCC=CCCCCCCCC)COC(=O)CCCCCCCC=CCCCCCCC)CCCCCCCC=CCC=CCCCCC	310	TRUE	TRUE	TRUE		FALSE	FALSE	null	null	100	100	71.7	93.7	100	254.66	190628_TT1_Hclass_Aging_017_18_12M_GF_M_Kidney_3_Pos	886.7851:4260 887.78845:4277 888.79181:2636	80.05157:24 81.06791:12 137.12891:24 147.11047:12 237.2177:10 263.23834:48 557.25616:12 565.50439:10 573.45703:36 575.49847:36 587.45587:12 587.4967:247 589.52203:323 591.5304:24 599.46753:12 599.49841:66 601.50305:135 601.50995:242 603.53174:36 613.5177:12 615.5387:60 801.67725:12 869.75775:48 886.78613:94	0.273033	7.36775	0.19078	2.67469	5.5949	2.57713	1.69761	0.379225	5.95995	5.71927	4.56383	5.46871	0.68935	12.6444	5.17016	14.4493	14.6532	72.5608
6275	8.05	888.577	BMP 44:10|BMP 22:4_22:6	[M+NH4]+		0.768	TRUE	8.07	888.575	C50H79O10P	BMP	NMUKIPFTBGVPME-UHFFFAOYSA-N	O=C(OC(CO)COP(=O)(O)OCC(OC(=O)CCCCCCCCC=CCC=CCC=CCC=CCC)CO)CCC=CCC=CCC=CCC=CCC=CCC=CCC	310	TRUE	TRUE	TRUE		FALSE	FALSE	null	null	100	100	40.7	87.3	100	172.04	190628_TT1_Hclass_Aging_QC_Pos_04	888.57471:5540 889.57806:5785 890.58142:2407	81.04277:10 93.06716:12 107.08724:12 121.09724:12 131.08955:12 133.10219:24 143.07297:12 145.09747:24 159.11288:12 171.1118:24 293.23364:12 313.27502:24 317.2388:10 385.26758:339 387.28076:163 389.26596:24 389.29639:392 599.47882:90 599.50629:60 611.48718:48 611.52191:60 623.47809:12 625.4978:12 627.52783:71 628.54407:36 699.54456:36 835.52826:24 888.5058:12 888.53088:24	1.32915	3.32956	1.48365	1.49102	3.05902	1.48078	1.66011	2.05343	3.23501	2.95533	3.06853	2.46563	2.2242	2.4884	2.65045	2.67927	3.1276	2.94765
6281	13.478	888.764	TG 52:4;1O|TG 16:0_18:1_18:3;1O	[M+NH4]+	adduct linked to 6112_[M+H]+	0.946	TRUE	13.74	888.765	C55H98O7	OxTG	NFDSJDYCYOQCOI-UHFFFAOYSA-N	O=C(OCC(OC(=O)CCCCCCCC=CCCCCCCCC)COC(=O)CCCCCCC(O)C=CCC=CCC=CCC)CCCCCCCCCCCCCCC	310	TRUE	TRUE	TRUE		FALSE	FALSE	null	null	100	99.2	53.9	79.3	100	1142.62	190628_TT1_Hclass_Aging_021_5_12M_SPF_M_Kidney_2_Pos	888.76782:11613 889.77117:10273 890.77453:6909	83.08939:12 93.07138:12 99.08798:12 119.09077:12 131.08176:12 135.11411:24 137.13264:24 141.12793:12 149.13463:24 151.15314:24 159.11673:12 179.14456:142 237.21204:12 247.23309:12 261.22379:24 265.2579:24 277.21387:309 279.22198:24 313.27563:36 339.28802:24 351.25772:24 551.48651:24 567.44354:12 571.4549:24 573.48608:48 575.48718:190 576.51428:24 577.51874:426 582.96387:10 589.4425:24 589.4834:53…	0.898585	26.4775	0.643803	7.85582	72.6296	45.0479	22.7189	2.55528	26.2635	9.6796	10.6225	91.1907	4.42481	4.71925	144.152	27.8657	67.8106	57.8663
6282	13.247	888.765	TG 52:4;1O|TG 16:1_18:1_18:2;1O	[M+NH4]+		0.286	TRUE	13.72	888.765	C55H98O7	OxTG	NCUVHOLDZAPUMH-UHFFFAOYSA-N	O=C(OCC(OC(=O)CCCCCCCC=CCCCCCCCC)COC(=O)CCCCCCC(O)C=CCC=CCCCCC)CCCCCCCC=CCCCCCC	310	TRUE	TRUE	TRUE		FALSE	FALSE	null	null	100	97.2	48.9	85.7	100	818.74	190628_TT1_Hclass_Aging_035_16_12M_GF_M_Kidney_1_Pos	888.76459:14904 889.76794:13014 890.7713:11362	81.06761:12 81.07898:12 85.06503:24 93.06939:24 95.08361:48 109.09696:24 119.08385:12 131.07767:12 132.04172:12 135.11646:48 137.1268:12 145.10016:12 149.13364:60 155.10571:24 159.11214:24 161.12737:12 163.14275:36 171.09814:12 175.14314:24 177.16002:24 179.13774:24 183.13559:24 189.15816:36 203.16818:12 233.22928:36 241.20142:12 243.21703:81 251.19205:12 255.00928:10 259.21439:12 261.22208:235 2…	0.341965	18.2227	0.254303	3.83436	35.0616	17.0746	10.9549	1.11251	22.6822	6.46672	12.1925	43.2925	1.80327	3.08378	49.4691	19.6126	64.2264	90.8682
6283	14.68	888.798	TG 53:3|TG 17:1_18:1_18:1	[M+NH4]+	ion correlated with 6004	0.929	TRUE	14.55	888.802	C56H102O6	TG	ZNQBEJJYVJSZLM-UHFFFAOYSA-N	O=C(OCC(OC(=O)CCCCCCCC=CCCCCCCCC)COC(=O)CCCCCCCC=CCCCCCCCC)CCCCCCCC=CCCCCCCC	310	TRUE	TRUE	TRUE		FALSE	FALSE	null	null	100	99.8	67.5	91.9	100	334.6	190628_TT1_Hclass_Aging_014_11_24M_SPF_M_Kidney_4_Pos	888.80347:16378 889.80682:17115 890.81018:6930	81.06544:24 83.08791:36 93.06978:12 97.10042:24 121.09863:48 125.09951:10 135.11366:36 149.12215:12 151.15263:12 233.20206:12 241.00378:10 251.23495:36 263.22229:12 263.24051:36 265.25:83 311.2486:12 325.27335:36 339.28918:48 561.47034:12 561.4903:48 563.49365:36 564.50336:48 575.46436:24 575.49463:99 577.51605:36 578.51465:24 587.4928:24 589.51819:2232 590.52362:145 591.54016:246 601.51294:199 6…	0.358356	10.2452	0.28105	3.65398	7.7644	4.0807	2.94402	0.500991	7.07421	8.5525	6.29845	8.95715	1.04792	12.9902	10.3268	21.2756	18.1858	62.1044
6301	13.371	890.782	TG 52:3;1O|TG 16:0_18:1_18:2;1O	[M+NH4]+		0.911	TRUE	13.79	890.781	C55H100O7	OxTG	DFCBOWJIHNPXMG-UHFFFAOYSA-N	O=C(OCC(OC(=O)CCCCCCCC=CCCCCCCCC)COC(=O)CCCCCCC(O)C=CCC=CCCCCC)CCCCCCCCCCCCCCC	310	TRUE	TRUE	TRUE		FALSE	FALSE	null	null	100	98	52.5	89.9	100	1097.94	190628_TT1_Hclass_Aging_030_3_9w_SPF_M_Kidney_3_Pos	890.78259:12850 891.78594:11277 892.7893:7388	109.09917:24 133.10406:24 135.12064:12 147.11607:12 159.11496:12 163.14561:48 167.14867:12 224.22495:10 233.22009:24 239.23698:24 243.20985:91 247.23087:24 251.23148:24 261.21698:228 263.23697:36 265.25562:36 279.23135:36 311.25726:24 313.27066:36 317.23691:36 317.25192:60 335.24228:10 339.29059:66 499.44662:24 517.47131:12 525.44336:24 571.44812:12 571.45483:24 573.48602:337 574.49115:24 575.503…	0.515081	21.0111	0.349589	4.96642	69.6005	50.0924	21.8735	1.78604	26.0416	8.71274	14.8521	95.0316	3.88483	3.86979	140.135	20.2263	78.3086	93.2044
6302	13.615	890.783	TG 52:3;1O|TG 16:0_18:1_18:2;1O	[M+NH4]+	adduct linked to 6133_[M+H]+	0.893	TRUE	13.79	890.781	C55H100O7	OxTG	DFCBOWJIHNPXMG-UHFFFAOYSA-N	O=C(OCC(OC(=O)CCCCCCCC=CCCCCCCCC)COC(=O)CCCCCCC(O)C=CCC=CCCCCC)CCCCCCCCCCCCCCC	310	TRUE	TRUE	TRUE		FALSE	FALSE	null	null	100	99.6	64.5	81.3	100	1154.28	190628_TT1_Hclass_Aging_029_42_12M_GF_F_Kidney_3_Pos	890.78064:39074 891.78399:33955 892.78735:21448	79.05176:12 81.07059:36 83.08289:24 93.07261:12 95.08412:48 107.08147:24 109.099:36 121.1019:36 131.08797:12 135.11224:80 137.13078:24 141.12604:24 147.12434:12 151.15462:24 153.12766:103 155.10475:48 161.1335:24 163.14354:24 167.11211:36 169.15532:36 173.12758:24 177.16649:12 181.12164:24 183.13078:179 195.13599:12 209.16891:12 233.21967:60 239.23219:36 243.21158:60 245.22678:24 251.231:122 261.…	0.998952	17.8082	0.606817	5.50486	57.2329	67.2471	26.3578	3.06076	15.5813	9.57764	11.0728	123.945	8.15641	3.19006	239.515	19.2341	42.3705	26.7489
6303	15.018	890.816	TG 53:2|TG 16:0_18:1_19:1	[M+NH4]+		0.679	TRUE	14.8	890.817	C56H104O6	TG	IDUAWMUEKRFTEE-UHFFFAOYSA-N	O=C(OCC(OC(=O)CCCCCCCC=CCCCCCCCC)COC(=O)CCCCCCCCCCCCCCC)CCCCCCCC=CCCCCCCCCC	310	TRUE	TRUE	TRUE		FALSE	FALSE	null	null	100	99.4	52.1	92.6	100	160.69	190628_TT1_Hclass_Aging_030_3_9w_SPF_M_Kidney_3_Pos	890.81451:2972 891.81786:3239 892.82122:1519	83.08662:8 109.09595:4 135.11864:12 170.34164:3 225.18771:3 265.25034:16 313.26736:4 313.27481:8 339.28452:8 443.05777:3 457.16208:16 499.21643:8 547.47223:8 557.24011:12 563.48804:8 563.54468:8 572.20831:3 575.49231:41 575.51587:37 576.49585:8 577.51715:117 578.51233:8 587.5415:8 589.52606:36 591.53442:252 592.54504:12 593.53943:16 603.53583:88 605.55408:28 617.54266:111 618.53339:8 619.55627:29…	0.287853	4.14931	0.220661	2.27019	3.19656	3.11984	1.3752	0.29026	2.6472	3.52151	2.17998	4.6954	0.697841	3.89358	5.90457	9.11562	7.01703	15.9973
6322	13.861	892.738	TG 54:8|TG 14:0_18:2_22:6	[M+NH4]+		0.464	TRUE	13.77	892.739	C57H94O6	TG	AINACBPMKQPREK-UHFFFAOYSA-N	O=C(OCC(OC(=O)CCCCCCCC=CCC=CCCCCC)COC(=O)CCCCCCCCCCCCC)CCC=CCC=CCC=CCC=CCC=CCC=CCC	310	TRUE	TRUE	TRUE		FALSE	FALSE	null	null	100	99.9	45.1	77.8	100	183.99	190628_TT1_Hclass_Aging_025_36_24M_SPF_F_Kidney_5_Pos	892.74017:3949 893.74352:4226 894.74688:7786	81.06813:36 93.06865:12 105.07426:12 117.0644:24 131.08818:12 143.07994:12 145.10789:12 149.13121:24 163.14922:24 195.11285:12 197.07581:24 227.16779:12 239.23273:24 263.23026:24 267.22473:12 279.22913:12 285.23071:24 287.23907:24 293.21033:12 293.23193:36 309.23077:12 311.23761:24 313.28818:24 323.09958:36 327.21875:10 367.26233:24 547.47406:375 557.242:10 571.44855:24 571.46869:68 573.49652:24 …	0.72749	7.91241	0.681207	2.5273	3.12399	2.12487	3.0607	1.50207	5.59631	3.45414	3.74999	3.45639	1.23782	6.99481	2.63577	6.29391	7.0927	12.5581
6323	13.522	892.795	TG 52:2;1O|TG 16:0_18:1_18:1;1O	[M+NH4]+	ion correlated with 6559	0.893	TRUE	13.86	892.796	C55H102O7	OxTG	GEIIXKWYIBANGA-UHFFFAOYSA-N	O=C(OCC(OC(=O)CCCCCCCC=CCCCCCCCC)COC(=O)CCCCCCC(O)C=CCCCCCCCC)CCCCCCCCCCCCCCC	310	TRUE	TRUE	TRUE		FALSE	FALSE	null	null	100	98.7	53.9	81.3	100	620.07	190628_TT1_Hclass_Aging_045_30_12M_SPF_F_Kidney_3_Pos	892.79321:44147 893.79656:36221 894.79992:14404	71.08503:36 81.06761:36 83.08754:36 93.06937:24 95.08495:60 109.1013:48 121.10119:24 123.11843:48 125.13193:24 133.09334:12 135.11798:36 149.12836:48 153.1198:12 159.11726:12 161.12541:24 163.14076:24 169.1178:24 175.14665:24 181.15831:12 183.13536:48 199.17368:10 201.16084:24 235.20024:24 239.23505:48 243.21007:24 245.22523:92 247.2421:24 249.22293:36 252.2424:36 261.20126:24 261.21259:63 263.23…	0.579073	11.4675	0.333499	3.33496	49.2415	57.0127	16.4998	1.79458	11.703	7.9844	9.05162	101.37	5.13809	2.35408	196.838	10.4553	42.226	38.508
6355	13.914	894.754	TG 54:7|TG 18:2_18:2_18:3	[M+NH4]+		0.286	TRUE	13.89	894.755	C57H96O6	TG	NGPHUAVENUDDAO-UHFFFAOYSA-N	O=C(OCC(OC(=O)CCCCCCCC=CCC=CCCCCC)COC(=O)CCCCCCCC=CCC=CCCCCC)CCCCCCCC=CCC=CCC=CCC	310	TRUE	TRUE	TRUE		FALSE	FALSE	null	null	100	100	52.3	88.5	100	328.6	190628_TT1_Hclass_Aging_036_21_18M_GF_M_Kidney_5_Pos	894.7547:7484 895.75805:5818 896.76141:6766	75.82738:10 81.0675:24 91.04984:12 95.08348:24 106.06532:12 119.08828:12 123.11056:24 133.08679:12 133.10622:12 145.11011:12 149.13171:48 161.12892:24 163.14967:24 175.14104:24 185.13458:12 189.16176:10 199.1479:12 201.12701:24 203.17389:24 215.18057:24 241.188:12 243.20792:24 261.224:36 263.23944:24 265.25351:24 309.12704:12 317.24191:24 325.12283:24 327.27188:10 335.26022:36 337.27234:60 343.11…	1.47227	15.9691	0.952018	9.65892	10.3246	5.98612	6.29687	1.7784	15.7214	5.87222	9.28224	10.523	1.9951	11.7006	8.36237	22.6773	27.2288	126.337
6356	14.075	894.755	TG 54:7|TG 16:0_16:1_22:6	[M+NH4]+	adduct linked to 6699_[M+ACN+Na]+	0.732	TRUE	13.92	894.755	C57H96O6	TG	JVFAGALXCYHZAP-UHFFFAOYSA-N	O=C(OCC(OC(=O)CCCCCCCC=CCCCCCC)COC(=O)CCCCCCCCCCCCCCC)CCC=CCC=CCC=CCC=CCC=CCC=CCC	310	TRUE	TRUE	TRUE		FALSE	FALSE	null	null	100	99.7	56.7	81.4	100	645.14	190628_TT1_Hclass_Aging_047_1_9w_SPF_M_Kidney_1_Pos	894.75293:29653 895.75628:35722 896.75964:79834	79.04892:24 81.06518:24 83.0838:48 91.05675:12 93.06678:24 97.10012:24 109.09412:24 109.10292:48 117.07739:12 121.09828:60 129.07257:36 131.0874:60 135.11491:60 137.13017:24 143.08076:36 143.09586:12 147.11348:24 157.09384:36 159.11575:48 161.12924:48 163.13924:24 163.14641:24 167.08235:12 169.09436:12 169.09619:36 171.11658:24 175.14323:48 181.10197:12 183.10719:36 187.09895:24 187.14117:36 193.…	3.14572	26.8184	2.60823	9.96246	9.2008	6.97663	10.1312	4.62439	17.2426	10.5463	11.3695	11.9457	4.12375	18.0474	8.81519	24.8301	23.4933	33.4101
6375	14.094	896.768	TG 54:6|TG 18:1_18:2_18:3	[M+NH4]+	adduct linked to 6409_[M+Na]+	0.482	TRUE	14.06	896.77	C57H98O6	TG	OTUIORVXGJUHBH-UHFFFAOYSA-N	O=C(OCC(OC(=O)CCCCCCCC=CCC=CCCCCC)COC(=O)CCCCCCCC=CCCCCCCCC)CCCCCCCC=CCC=CCC=CCC	310	TRUE	TRUE	TRUE		FALSE	FALSE	null	null	100	100	73.7	88.3	100	2156.11	190628_TT1_Hclass_Aging_020_7_18M_SPF_M_Kidney_1_Pos	896.77081:77694 897.77416:78677 898.77752:44808	77.03737:24 79.05293:48 81.06798:77 83.04572:24 83.08281:48 91.0477:24 93.06847:48 95.08678:147 105.06973:24 107.08138:60 109.09745:70 111.11605:24 117.07175:12 119.08286:48 121.09719:74 122.09364:12 123.11596:60 131.07826:12 133.10216:63 135.11707:114 137.13235:90 143.07964:36 145.09406:36 147.11575:148 149.13087:163 151.14764:77 153.13452:24 159.10931:36 161.12987:111 163.14168:103 165.16055:60…	6.26495	84.483	3.85007	45.9786	53.7126	27.4795	24.4027	6.58701	73.3159	28.6883	56.473	51.675	10.8088	61.7818	46.1665	152.008	130.757	999.75
6376	14.246	896.77	TG 54:6|TG 16:0_16:0_22:6	[M+NH4]+	adduct linked to 6718_[M+ACN+Na]+; adduct linked to 6410_[M+Na]+	0.214	TRUE	14.13	896.77	C57H98O6	TG	GNADFLWMYUNMMR-UHFFFAOYSA-N	O=C(OCC(OC(=O)CCCCCCCCCCCCCCC)COC(=O)CCCCCCCCCCCCCCC)CCC=CCC=CCC=CCC=CCC=CCC=CCC	310	TRUE	TRUE	TRUE		FALSE	FALSE	null	null	100	99.9	67.8	87.5	100	1563.12	190628_TT1_Hclass_Aging_025_36_24M_SPF_F_Kidney_5_Pos	896.77155:36164 897.7749:28867 898.77826:44222	71.08552:60 79.05563:12 81.0682:60 85.10059:60 91.05598:24 95.0843:79 97.10074:24 105.07147:24 109.09629:36 113.1296:24 117.07968:12 121.10371:36 123.10853:24 125.12981:12 129.0575:12 131.08185:48 133.0993:36 135.11584:60 137.12946:48 141.0647:24 143.0834:24 149.13132:77 157.09668:36 159.11687:60 161.1357:48 163.14934:36 165.16286:24 169.0992:36 171.11595:48 173.13173:48 175.14261:36 177.16136:24…	11.0224	42.963	8.03511	31.1581	22.2308	22.8931	21.1604	10.5666	35.5045	20.5928	22.4055	30.8106	11.4781	29.9629	26.1031	56.651	57.7976	95.8793
6377	14.385	896.771	TG 54:6|TG 16:0_16:0_22:6	[M+NH4]+	adduct linked to 6717_[M+ACN+Na]+	0.196	TRUE	14.13	896.77	C57H98O6	TG	GNADFLWMYUNMMR-UHFFFAOYSA-N	O=C(OCC(OC(=O)CCCCCCCCCCCCCCC)COC(=O)CCCCCCCCCCCCCCC)CCC=CCC=CCC=CCC=CCC=CCC=CCC	310	TRUE	TRUE	TRUE		FALSE	FALSE	null	null	100	99.2	74	88.7	100	2912.11	190628_TT1_Hclass_Aging_003_27_9w_SPF_F_Kidney_3_Pos	896.76947:55991 897.77282:60683 898.77618:47461	71.08342:94 79.0534:48 81.07098:89 83.08457:139 85.09697:108 90.76725:12 91.05222:48 93.06897:48 95.08318:124 97.0996:88 99.11622:48 105.06307:12 107.08337:48 109.09945:85 111.11955:24 119.08188:36 121.0962:24 123.11652:88 125.13158:36 129.06566:36 131.08205:123 133.09949:60 135.07851:36 135.11275:48 137.13129:48 139.14822:36 141.06654:24 143.08357:60 145.09296:24 145.10141:100 147.11635:92 149.1…	12.2548	36.2941	11.6998	16.3658	12.6337	14.8726	12.0708	11.6284	23.0792	20.7649	20.523	17.1111	13.054	25.4174	11.4532	40.0237	28.419	22.3024
6389	14.479	898.786	TG 54:5|TG 16:0_18:1_20:4	[M+NH4]+		0.036	TRUE	14.36	898.786	C57H100O6	TG	WNGNQJVTTOEUDY-UHFFFAOYSA-N	O=C(OCC(OC(=O)CCCCCCCC=CCCCCCCCC)COC(=O)CCCCCCCCCCCCCCC)CCCCCCC=CCC=CCC=CCC=CCC	310	TRUE	TRUE	TRUE		FALSE	FALSE	null	null	100	99.8	58.4	85.3	100	3091.43	190628_TT1_Hclass_Aging_003_27_9w_SPF_F_Kidney_3_Pos	898.78607:40231 899.78942:38810 900.79278:26980	71.08211:36 77.03277:12 79.05326:24 83.0857:48 85.09552:36 91.05071:48 93.07015:78 95.08164:48 97.09942:36 105.06144:12 109.09632:12 117.0903:12 119.08166:48 121.09752:36 123.11318:36 128.06468:24 131.07698:12 131.08501:85 133.10248:91 135.11577:48 137.13103:48 143.07828:24 145.09946:85 147.11778:60 149.09521:36 151.14967:36 157.0983:48 159.11316:60 161.13019:78 163.14915:48 167.14137:24 169.4495…	10.6867	34.6191	8.40663	42.221	25.619	22.6841	20.5269	11.4832	34.884	21.5688	28.2987	35.5082	12.6518	28.3139	35.3261	100.321	69.0489	140.545
6390	14.314	898.786	TG 54:5|TG 18:1_18:2_18:2	[M+NH4]+	adduct linked to 6422_[M+Na]+	0.911	TRUE	14.32	898.786	C57H100O6	TG	VVEBTVMJPTZDHO-UHFFFAOYSA-N	O=C(OCC(OC(=O)CCCCCCCC=CCC=CCCCCC)COC(=O)CCCCCCCC=CCCCCCCCC)CCCCCCCC=CCC=CCCCCC	310	TRUE	TRUE	TRUE		FALSE	FALSE	null	null	100	100	86.2	92.1	100	6802.52	190628_TT1_Hclass_Aging_011_19_18M_GF_M_Kidney_2_Pos	898.7854:265768 899.78875:250101 900.79211:109725	71.08832:60 79.0511:95 81.06739:508 83.08349:151 85.06741:36 85.10106:36 87.67413:10 93.0692:110 95.08342:529 97.10123:102 99.08155:48 105.06334:12 105.06622:36 107.08365:185 109.09828:287 111.07991:48 111.11689:105 113.0958:36 119.08373:97 119.09292:12 121.09962:353 123.11218:187 125.09268:48 127.11113:48 131.07919:36 133.09985:185 135.11476:486 136.70477:24 137.12839:115 139.1122:36 141.13026:3…	14.3302	286.079	9.56615	124.855	197.677	111.62	78.497	18.3304	273.565	93.6305	222.065	202.876	36.9219	196.71	226.712	539.492	556.932	3738.99
6391	13.331	898.788	TG 54:5|TG 18:1_18:2_18:2	[M+NH4]+	ion correlated with 6134	0.054	TRUE	14.32	898.786	C57H100O6	TG	VVEBTVMJPTZDHO-UHFFFAOYSA-N	O=C(OCC(OC(=O)CCCCCCCC=CCC=CCCCCC)COC(=O)CCCCCCCC=CCCCCCCCC)CCCCCCCC=CCC=CCCCCC	410	TRUE	TRUE	TRUE		FALSE	FALSE	null	null	100	88.4	57.3	82.5	100	101.1	190628_TT1_Hclass_Aging_014_11_24M_SPF_M_Kidney_4_Pos	898.78845:3206 899.7918:2709 900.79516:5947	147.07687:12 159.10957:12 184.06642:12 184.07404:48 197.07562:12 197.07957:24 243.1987:12 243.214:24 247.24168:24 261.22128:12 263.23901:36 269.23056:24 279.21701:24 313.25046:12 337.28235:12 574.47687:24 575.49969:60 577.50092:24 577.5144:48 587.49115:24 599.46539:24 599.49628:352 600.49988:24 601.51471:293 603.50891:24 603.5365:48 613.4704:12 616.51514:24 625.50861:24 853.69135:12 863.71997:12 …	0.176035	3.91872	0.0992556	0.99342	1.44757	1.41312	1.23777	0.267345	3.49457	1.20722	1.71624	2.17253	0.26362	2.54285	2.55016	3.36476	8.59586	55.2261
6399	12.899	900.726	TG 52:6;2O|TG 16:1_18:2_18:3;2O	[M+NH4]+	adduct linked to 4337_[M-C6H10O4+H]+	0.518	TRUE	13.2	900.729	C55H94O8	OxTG	AAEONIBPPBPGSN-UHFFFAOYSA-N	O=C(OCC(OC(=O)CCCCCCCC=CCC=CCCCCC)COC(=O)CCCCCC(O)C(O)C=CCC=CCC=CCC)CCCCCCCC=CCCCCCC	310	TRUE	TRUE	TRUE		FALSE	FALSE	null	null	100	98.8	44.6	87.7	100	79.06	190628_TT1_Hclass_Aging_011_19_18M_GF_M_Kidney_2_Pos	900.724:1525 901.72735:1588 902.73071:2836	83.0809:24 141.09187:10 157.15524:10 173.09164:10 184.07106:86 253.0594:10 269.64401:10 291.17239:12 293.20633:81 311.25824:12 315.16199:10 331.24231:10 359.32013:10 389.30106:10 507.47955:10 523.46521:10 567.22095:10 573.48071:92 575.52557:48 585.41388:10 601.52051:97 603.42511:24 603.45959:82 603.51819:48 603.53888:60 611.46912:24 627.41815:12 627.46033:48 629.46539:122 640.60718:10 747.27875:1…	0.0653394	1.92541	0.0480606	0.463057	3.9929	1.69782	0.990558	0.186467	2.8457	0.701935	1.27423	3.8281	0.2339	0.459235	4.70834	1.966	5.8544	11.872
6401	14.576	900.799	TG 54:4|TG 18:1_18:1_18:2	[M+NH4]+	adduct linked to 6440_[M+Na]+	1	TRUE	14.51	900.802	C57H102O6	TG	JTMWOTXEVWLTTO-UHFFFAOYSA-N	O=C(OCC(OC(=O)CCCCCCCC=CCCCCCCCC)COC(=O)CCCCCCCC=CCCCCCCCC)CCCCCCCC=CCC=CCCCCC	310	TRUE	TRUE	TRUE		FALSE	FALSE	null	null	100	100	87.8	89.9	100	13519.8	190628_TT1_Hclass_Aging_029_42_12M_GF_F_Kidney_3_Pos	900.80188:233288 901.80523:227645 902.80859:92230	71.08669:60 79.05061:69 79.0556:99 81.06816:248 83.08427:179 85.06172:36 88.20916:10 91.05727:36 93.07137:85 95.08424:472 97.10067:255 99.0768:36 105.06851:48 107.08305:60 109.09913:399 111.08373:36 111.11627:70 113.0907:12 121.09742:222 123.11464:161 125.09515:24 125.13125:36 127.11203:48 133.09428:12 133.09915:112 135.11404:646 137.13095:109 139.11148:24 141.12787:36 147.1143:80 149.12943:333 1…	21.5119	523.904	14.9903	195.654	440.26	280.828	174.624	34.1451	508.367	170.354	419.231	500.579	89.2214	335.849	685.399	1002.65	1143.2	5884.61
6403	13.316	900.802	TG 54:4|TG 18:1_18:1_18:2	[M+NH4]+	ion correlated with 6134; adduct linked to 6631_[M+Na]+	0.125	TRUE	14.51	900.802	C57H102O6	TG	JTMWOTXEVWLTTO-UHFFFAOYSA-N	O=C(OCC(OC(=O)CCCCCCCC=CCCCCCCCC)COC(=O)CCCCCCCC=CCCCCCCCC)CCCCCCCC=CCC=CCCCCC	410	TRUE	TRUE	TRUE		FALSE	FALSE	null	null	100	83.9	74.5	87.4	100	154.6	190628_TT1_Hclass_Aging_033_12_24M_SPF_M_Kidney_5_Pos	900.79694:4985 901.80029:3873 902.80365:4548	81.0662:12 81.06873:24 95.07932:24 106.08114:12 135.11452:24 232.38297:10 265.24628:48 339.27444:12 339.28479:36 519.43121:12 573.48718:24 575.51184:36 576.48169:12 597.49359:10 599.48456:24 601.49255:238 601.50977:676 602.51855:81 603.52466:376 604.5351:24 883.75397:68 883.7832:60 900.78333:117	0.152234	5.4763	0.0852553	1.2862	1.56293	1.34936	1.62154	0.296101	4.76062	1.70249	2.5518	2.61473	0.310709	3.27255	2.96918	5.49435	13.0331	77.3461
6405	14.578	900.829	TG O-55:4|TG O-19:2_18:1_18:1	[M+NH4]+		0.196	TRUE	15.24	900.838	C58H106O5	EtherTG	LNWGWOPKHLORMO-UHFFFAOYSA-N	O=C(OCC(OC(=O)CCCCCCCC=CCCCCCCCC)COCCCCCCCCC=CCC=CCCCCCC)CCCCCCCC=CCCCCCCCC	410	TRUE	TRUE	TRUE		FALSE	FALSE	null	null	100	95	82.8	90.4	100	787.24	190628_TT1_Hclass_Aging_QC_Pos_02	900.83618:1074 901.83953:1839 902.84289:3531	81.06482:12 81.06734:36 83.08728:36 91.05374:12 93.07051:36 95.08474:70 97.09703:24 107.08505:24 109.10116:36 111.12127:48 121.10111:36 123.1168:48 133.09494:12 135.11797:76 139.14856:24 149.13013:75 151.14516:48 161.12733:36 163.14989:48 165.15981:48 175.14131:48 183.16792:12 191.17836:12 205.19337:12 245.21935:60 247.24281:121 263.23337:438 265.24969:411 319.24805:12 319.26559:48 321.27701:36 3…	1.03353	1.16854	0.3032	8.68704	15.9679	17.9569	7.09727	0.902682	17.3611	7.45635	19.7267	17.4166	4.10175	15.5735	48.345	41.7836	54.3028	223.51
6417	13.085	902.747	TG 52:5;2O|TG 16:1_18:1_18:3;2O	[M+NH4]+	ion correlated with 6654	0.875	TRUE	13.4	902.744	C55H96O8	OxTG	YTGAUHRHWVGYPV-UHFFFAOYSA-N	O=C(OCC(OC(=O)CCCCCCCC=CCCCCCCCC)COC(=O)CCCCCC(O)C(O)C=CCC=CCC=CCC)CCCCCCCC=CCCCCCC	310	TRUE	TRUE	TRUE		FALSE	FALSE	null	null	100	98.7	55.4	89.9	100	389.03	190628_TT1_Hclass_Aging_QC_Pos_05	902.74719:7653 903.75054:6293 904.7539:11059	109.0989:24 128.06433:10 153.12581:24 184.07181:24 245.1981:24 265.255:36 273.19321:12 275.19608:36 289.17972:12 291.2019:60 293.21191:348 311.25656:12 319.25125:12 339.28464:24 349.24536:12 429.07001:10 467.37726:24 575.47235:48 575.4892:447 577.50055:60 585.47906:36 589.48883:36 602.52991:24 603.45679:271 603.51538:48 603.54987:76 605.48871:151 605.54401:24 613.45258:24 613.46997:24 613.51862:1…	0.333882	13.0605	0.235915	3.02064	24.3817	6.5659	8.09475	1.03433	18.1884	4.7433	7.5192	30.5265	1.65351	2.49922	42.0439	13.8423	38.3769	55.5909
6418	13.388	902.768	HexCer 46:0;4O|HexCer 20:0;3O/26:0;(2OH)	[M+H]+		0.018	TRUE	13.28	902.765	C52H103NO10	HexCer_AP	WGQXRMKTAWSVBY-UHFFFAOYSA-N	O=C(NC(COC1OC(CO)C(O)C(O)C1O)C(O)C(O)CCCCCCCCCCCCCCCC)C(O)CCCCCCCCCCCCCCCCCCCCCCCC	310	TRUE	TRUE	TRUE		FALSE	FALSE	null	null	100	99.9	64.7	89.9	100	446.6	190628_TT1_Hclass_Aging_005_33_18M_SPF_F_Kidney_3_Pos	902.76776:9657 903.77111:18040 904.77447:12025	135.11386:12 239.2254:12 265.24332:36 291.1824:12 292.29205:48 310.28897:12 310.30875:287 313.25464:12 321.3175:12 328.31482:60 338.31561:12 338.34402:48 346.32452:12 412.3941:12 412.40549:48 454.41138:36 454.43231:12 477.39139:10 573.49017:48 574.48523:60 575.4845:36 577.52283:36 578.51801:48 589.45685:12 589.5011:36 592.50635:48 599.49451:36 600.50153:48 601.50598:60 602.49408:24 603.51398:177 …	0.284312	1.48884	0.427617	2.51304	11.9793	2.98738	1.511	0.212018	1.91743	1.0133	1.24035	2.18712	0.498431	0.626471	6.84658	1.62535	2.12461	0.83689
6419	14.877	902.816	TG 54:3|TG 18:1_18:1_18:1	[M+NH4]+	adduct linked to 6455_[M+Na]+	1	TRUE	14.65	902.817	C57H104O6	TG	PHYFQTYBJUILEZ-UHFFFAOYSA-N	O=C(OCC(OC(=O)CCCCCCCC=CCCCCCCCC)COC(=O)CCCCCCCC=CCCCCCCCC)CCCCCCCC=CCCCCCCCC	310	TRUE	TRUE	TRUE		FALSE	FALSE	null	null	100	99.5	87.1	85.6	100	11419.9	190628_TT1_Hclass_Aging_021_5_12M_SPF_M_Kidney_2_Pos	902.8161:642931 903.81945:537964 904.82281:198726	71.08427:91 77.03997:48 79.05182:134 81.06812:594 83.08551:468 85.06427:48 85.10051:84 89.67667:10 92.05883:12 93.06727:122 95.08283:866 97.06192:24 97.10063:537 99.08234:60 101.09395:36 105.07134:48 107.08301:147 109.10203:465 111.07926:85 111.11328:357 113.09066:12 113.09812:48 119.08611:36 121.10047:601 123.1146:320 125.09355:36 125.13122:106 127.11201:36 129.12907:24 133.0975:60 135.11729:885…	20.3985	385.517	14.5943	153.956	398.2	320.172	171.547	28.1125	324.304	154.642	347.037	525.581	106.627	200.44	947.057	788.13	900.56	3027.12
6431	12.998	904.76	TG 52:4;2O|TG 16:1_18:1_18:2;2O	[M+NH4]+		0.786	TRUE	13.58	904.76	C55H98O8	OxTG	GSLMGUJTWYLQLS-UHFFFAOYSA-N	O=C(OCC(OC(=O)CCCCCCCC=CCCCCCCCC)COC(=O)CCCCCC(O)C(O)C=CCC=CCCCCC)CCCCCCCC=CCCCCCC	410	TRUE	TRUE	TRUE		FALSE	FALSE	null	null	100	95.9	39.2	90.4	100	782.8	190628_TT1_Hclass_Aging_019_17_12M_GF_M_Kidney_2_Pos	904.75812:14175 905.76147:12196 906.76483:6717	79.05188:10 81.06692:24 85.10187:24 97.10487:12 109.10067:24 119.08776:24 131.07861:12 135.1207:24 137.12943:24 146.98174:24 147.11955:12 151.10664:48 161.13031:36 167.10522:24 177.09035:12 184.06474:24 193.11304:12 219.21283:24 223.17159:10 243.19691:12 249.17863:12 259.19821:60 261.224:12 275.18527:12 275.19925:48 277.21408:153 279.21988:24 291.22437:12 293.19601:36 293.20563:124 295.22012:24 3…	0.322655	20.2741	0.207914	3.71254	50.637	27.9258	13.3475	1.14082	25.2927	6.97838	12.185	63.9476	2.21433	3.49146	105.823	21.9629	74.2876	141.483
6432	13.229	904.761	TG 52:4;2O|TG 16:0_18:1_18:3;2O	[M+NH4]+		0.946	TRUE	13.59	904.76	C55H98O8	OxTG	GYTIAZWYWATMNI-UHFFFAOYSA-N	O=C(OCC(OC(=O)CCCCCCCC=CCCCCCCCC)COC(=O)CCCCCC(O)C(O)C=CCC=CCC=CCC)CCCCCCCCCCCCCCC	310	TRUE	TRUE	TRUE		FALSE	FALSE	null	null	100	98.3	73	86.4	100	854.44	190628_TT1_Hclass_Aging_QC_Pos_04	904.75891:12246 905.76226:10838 906.76562:21095	75.7069:10 93.06709:12 99.07936:24 145.09906:10 184.07555:36 239.23199:24 275.1936:48 275.2099:81 292.26349:24 293.20938:663 313.2822:36 332.98944:10 339.28964:67 367.23154:12 493.37396:10 551.51129:36 574.47607:24 575.49219:48 577.49341:150 577.51703:664 587.46313:24 589.49866:24 598.18384:12 603.46326:48 603.51501:24 604.53229:36 605.47455:796 605.54358:36 606.47626:36 609.97137:10 613.45917:36…	0.665294	24.2564	0.47183	6.97951	103.339	36.928	14.8039	2.45148	27.3577	8.90028	14.1469	84.2138	4.38042	3.65722	130.117	25.0614	57.0615	59.9854
6434	15.273	904.834	TG 54:2|TG 18:0_18:1_18:1	[M+NH4]+	adduct linked to 6482_[M+Na]+; adduct linked to 6767_[M+ACN+Na]+	0.946	TRUE	14.96	904.833	C57H106O6	TG	RYNHWWNZNIGDAQ-UHFFFAOYSA-N	O=C(OCC(OC(=O)CCCCCCCC=CCCCCCCCC)COC(=O)CCCCCCCCCCCCCCCCC)CCCCCCCC=CCCCCCCCC	310	TRUE	TRUE	TRUE		FALSE	FALSE	null	null	100	98.6	83.8	91.1	100	1640.7	190628_TT1_Hclass_Aging_015_31_18M_SPF_F_Kidney_1_Pos	904.8338:102190 905.83715:85887 906.84051:30969	71.08661:48 81.06553:60 83.08416:82 85.09913:36 93.06987:36 95.08409:124 97.10051:88 107.08431:48 109.1004:87 111.11607:88 121.10181:96 123.11283:79 135.11214:129 137.13229:48 149.13252:68 151.13893:24 153.12575:24 163.14873:85 167.14093:24 177.17188:24 247.24104:291 265.25009:513 267.26495:122 293.28839:36 306.46228:10 321.26968:24 323.28989:36 337.9079:10 339.28152:231 341.30307:101 529.51123:3…	5.64658	25.7518	3.63401	28.1179	44.9397	93.2289	18.9805	3.75855	18.9457	16.81	21.6903	79.4052	27.4428	15.1516	230.213	42.4079	68.1821	69.9988
6444	14.016	906.754	TG 55:8|TG 15:0_18:2_22:6	[M+NH4]+		0.018	TRUE	13.86	906.755	C58H96O6	TG	CCWZMJPDSMVFGX-UHFFFAOYSA-N	O=C(OCC(OC(=O)CCCCCCCC=CCC=CCCCCC)COC(=O)CCCCCCCCCCCCCC)CCC=CCC=CCC=CCC=CCC=CCC=CCC	310	TRUE	TRUE	TRUE		FALSE	FALSE	null	null	100	99.7	38.9	80	100	95.32	190628_TT1_Hclass_Aging_024_10_24M_SPF_M_Kidney_3_Pos	906.75354:1704 907.75689:1684 908.76025:1593	80.04535:24 91.05037:12 97.09632:10 133.09731:10 137.12743:24 147.11577:36 165.16599:10 182.10492:10 185.12807:24 191.14232:12 203.14314:12 203.17914:36 223.13959:12 225.21948:12 250.11581:10 263.23425:24 269.18893:10 289.2467:10 293.22171:24 304.02612:10 325.21594:10 337.26672:24 346.11118:10 365.28778:10 377.06042:10 429.08777:24 547.45654:10 552.5011:24 555.5694:10 561.4787:133 563.47876:12 58…	0.0745453	1.43733	0.0643594	0.556611	1.06242	0.584228	0.493551	0.1321	1.23603	0.672802	0.766208	0.980522	0.135477	1.3206	1.20074	1.52653	3.08543	8.51102
6448	13.168	906.778	TG 52:3;2O|TG 16:0_18:1_18:2;2O	[M+NH4]+	ion correlated with 6674; adduct linked to 6497_[M+Na]+	0.536	TRUE	13.67	906.776	C55H100O8	OxTG	ZPKRSKXEYVFKJW-UHFFFAOYSA-N	O=C(OCC(OC(=O)CCCCCCCC=CCCCCCCCC)COC(=O)CCCCCC(O)C(O)C=CCC=CCCCCC)CCCCCCCCCCCCCCC	410	TRUE	TRUE	TRUE		FALSE	FALSE	null	null	100	96.8	44.7	85.1	100	777.64	190628_TT1_Hclass_Aging_034_32_18M_SPF_F_Kidney_2_Pos	906.77539:37819 907.77874:31373 908.7821:14004	79.04777:12 79.05276:36 83.08518:36 85.10276:24 93.0669:12 95.08519:36 97.10301:36 109.10012:24 135.11671:48 137.13364:24 139.1059:60 140.1488:36 143.08765:12 147.11537:142 149.14076:60 151.10928:105 153.08203:12 157.11162:12 161.12944:48 163.11256:48 167.14604:12 171.10945:36 173.13258:24 175.14531:24 177.12485:36 179.13992:60 181.12674:24 184.07133:12 189.16234:24 205.20563:12 222.07327:10 231.…	0.672929	35.6688	0.425023	8.4057	96.9145	62.1536	21.5287	2.42408	39.8414	10.946	20.9024	132.979	4.95359	5.7567	194.912	33.4501	116.992	155.63
6451	15.737	906.85	TG 54:1|TG 18:0_18:0_18:1	[M+NH4]+		0.768	TRUE	15.37	906.848	C57H108O6	TG	YFFIQXNTTVSKJC-UHFFFAOYSA-N	O=C(OCC(OC(=O)CCCCCCCCCCCCCCCCC)COC(=O)CCCCCCCCCCCCCCCCC)CCCCCCCC=CCCCCCCCC	310	TRUE	TRUE	TRUE		FALSE	FALSE	null	null	100	98.5	70.1	91.1	100	164.22	190628_TT1_Hclass_Aging_013_45_18M_GF_F_Kidney_3_Pos	906.84412:6900 907.84747:6604 908.85083:2796	81.06505:6 83.08369:18 95.08091:6 99.1167:6 135.10855:6 137.12704:12 151.14211:12 163.19331:5 229.07228:5 247.24564:18 265.22751:6 265.2435:30 267.26291:24 339.30286:12 341.29337:24 355.04626:6 369.33499:6 430.07953:18 557.21466:6 575.63818:6 577.48114:12 577.51147:198 579.52637:42 603.60596:18 605.5484:1148 607.52509:24 607.56311:570 624.97241:6 631.55286:12 633.57855:186 635.60748:12 857.50165:…	1.28433	1.16996	0.87324	2.28096	3.18725	9.23348	1.5619	0.508629	1.06755	1.17353	1.20906	5.17818	2.66322	0.988267	15.4947	1.8905	3.09575	2.53594
6469	14.204	908.775	TG 55:7|TG 16:0_17:1_22:6	[M+NH4]+	ion correlated with 6691	0.107	TRUE	14.04	908.77	C58H98O6	TG	ASHYPKAQBLSNHV-UHFFFAOYSA-N	O=C(OCC(OC(=O)CCCCCCCC=CCCCCCCC)COC(=O)CCCCCCCCCCCCCCC)CCC=CCC=CCC=CCC=CCC=CCC=CCC	310	TRUE	TRUE	TRUE		FALSE	FALSE	null	null	100	99.6	36.7	69.5	100	93.44	190628_TT1_Hclass_Aging_014_11_24M_SPF_M_Kidney_4_Pos	908.77026:2973 909.77361:3307 910.77697:2395	80.0467:100 161.09602:12 195.11038:10 223.1394:12 241.1544:24 264.23663:24 287.23813:12 293.24539:12 311.22916:24 311.23657:48 315.21988:10 325.26868:24 563.49768:273 600.50574:24 601.5033:60 602.51544:103 603.53192:87 604.52167:48 604.57001:24 609.4964:36 623.47723:24 623.50177:48 627.5235:12 628.62067:12 635.51025:36 637.521:12 649.52356:60 891.73218:36 901.7157:48 908.75757:97 908.81256:36	0.152908	2.91004	0.128301	1.09909	3.22074	1.83572	1.10033	0.241734	2.7673	1.24819	1.62433	2.24943	0.319201	2.35804	3.11111	3.48866	6.98951	15.6412
6470	13.315	908.79	TG 52:2;2O|TG 16:0_18:1_18:1;2O	[M+NH4]+	ion correlated with 6692	0.054	TRUE	13.75	908.791	C55H102O8	OxTG	ZJFHMQGFSIYICU-UHFFFAOYSA-N	O=C(OCC(OC(=O)CCCCCCCC=CCCCCCCCC)COC(=O)CCCCCC(O)C=CC(O)CCCCCCCC)CCCCCCCCCCCCCCC	310	TRUE	TRUE	TRUE		FALSE	FALSE	null	null	100	97.7	34.5	87.7	100	648.3	190628_TT1_Hclass_Aging_015_31_18M_SPF_F_Kidney_1_Pos	908.79034:23963 909.79369:19813 910.79705:8764	71.08793:24 81.06441:12 86.06636:10 91.05328:24 95.08153:60 97.10208:36 99.081:36 107.07725:12 109.10353:36 111.11479:12 113.10711:36 119.0846:12 135.11401:36 137.12926:24 141.13116:12 147.11424:24 149.1328:24 153.13124:12 161.13184:24 163.10782:24 163.14725:36 171.09358:24 175.14783:12 179.14435:24 181.16518:24 195.14001:24 227.12297:36 231.21193:48 233.22401:24 239.24095:60 243.20946:24 249.222…	0.18569	2.94965	0.143973	1.17312	46.4989	18.249	3.26124	0.459204	3.10591	1.73162	1.63686	27.5315	1.19034	0.678938	53.9837	2.15863	10.302	7.80756
6472	14.797	908.8	TG O-56:7|TG O-16:0_18:1_22:6	[M+NH4]+		0.018	TRUE	14.85	908.807	C59H102O5	EtherTG	KDSNENFCHVVKFJ-UHFFFAOYSA-N	O=C(OCC(OC(=O)CCC=CCC=CCC=CCC=CCC=CCC=CCC)COCCCCCCCCCCCCCCCC)CCCCCCCC=CCCCCCCCC	310	TRUE	TRUE	TRUE		FALSE	FALSE	null	null	100	100	33	54	100	168.61	190628_TT1_Hclass_Aging_004_14_9w_GF_M_Kidney_2_Pos	908.80048:4044 909.80383:3000 910.80719:1345	83.07557:12 97.09538:24 141.16475:24 225.25986:12 293.22678:24 311.23471:75 518.02277:10 538.54633:12 561.48834:24 561.505:36 562.51624:24 563.53503:233 577.51416:36 578.50256:60 578.55658:24 579.53235:48 587.50787:12 601.5144:12 603.51892:24 604.53278:48 605.52338:60 609.48676:12 609.51794:89 611.5462:24 625.50476:36 626.51239:48 635.52515:36 637.57135:10 649.49573:36 649.52435:48 883.74786:60 8…	0.463438	11.0092	0.530547	2.72181	2.45789	2.29688	1.37088	0.698691	3.0492	2.50184	3.08071	2.61259	0.77272	3.51366	3.90635	3.62127	5.65834	13.8608
6473	16.234	908.862	TG 54:0|TG 18:0_18:0_18:0	[M+NH4]+		0.268	TRUE	15.95	908.864	C57H110O6	TG	DCXXMTOCNZCJGO-UHFFFAOYSA-N	O=C(OCC(OC(=O)CCCCCCCCCCCCCCCCC)COC(=O)CCCCCCCCCCCCCCCCC)CCCCCCCCCCCCCCCCC	310	TRUE	TRUE	TRUE		FALSE	FALSE	null	null	100	99.1	76.5	82.2	100	123.45	190628_TT1_Hclass_Aging_Blank_Pos	908.86475:2685 909.8681:2138 910.87146:893	79.04813:1 81.06942:2 95.08271:4 97.10325:2 109.09587:2 109.27768:1 123.11412:2 127.14469:2 151.14528:5 153.16165:1 165.15614:2 223.07924:2 239.23466:2 246.241:1 267.26312:24 282.0491:2 285.27014:2 313.27206:2 341.29776:6 343.02896:2 353.1257:1 355.06903:2 357.06012:2 359.03281:2 429.08569:2 431.09064:5 457.15414:4 499.2077:2 523.46936:4 546.96045:1 551.49841:4 555.48944:1 557.25354:7 579.53864:3…	0.402365	1.52787	0.455949	0.565361	3.70079	2.83959	0.801263	0.953005	2.60883	1.7999	1.76804	1.64702	0.993498	2.15024	3.87481	0.860549	5.23869	23.7788
6474	16.303	908.868	TG 54:0|TG 16:0_18:0_20:0	[M+NH4]+		0.696	TRUE	15.98	908.864	C57H110O6	TG	DHDAMQPBPJWJEI-UHFFFAOYSA-N	O=C(OCC(OC(=O)CCCCCCCCCCCCCCCCC)COC(=O)CCCCCCCCCCCCCCCCCCC)CCCCCCCCCCCCCCC	310	TRUE	TRUE	TRUE		FALSE	FALSE	null	null	100	99	66.3	74.9	100	100.27	190628_TT1_Hclass_Aging_033_12_24M_SPF_M_Kidney_5_Pos	908.85864:2748 909.86199:2363 910.86535:835	81.06759:4 83.08624:4 85.10124:6 92.30341:1 95.08493:6 97.0986:5 99.1166:2 109.10275:1 121.09655:1 137.13326:4 149.05296:1 165.16325:2 204.02686:1 221.08887:2 246.08521:1 267.26379:11 267.26837:14 283.04523:2 285.28519:2 341.30426:7 342.01749:2 347.05981:1 356.06799:4 362.8945:2 397.37253:1 407.92804:1 429.08493:2 430.09412:5 432.07516:2 451.10147:1 457.13858:2 474.94617:2 499.18546:2 499.20428:5…	0.394506	1.78252	0.474964	0.550554	3.90173	2.84255	1.38903	0.941323	2.68389	1.74073	1.55498	3.34958	0.878477	1.89008	3.59997	1.42295	5.39004	18.3855
6518	13.506	914.778	TG 54:5;1O|TG 18:1_18:1_18:3;1O	[M+NH4]+		0.946	TRUE	13.77	914.781	C57H100O7	OxTG	ZPQFVHIQSAFTFS-UHFFFAOYSA-N	O=C(OCC(OC(=O)CCCCCCCC=CCCCCCCCC)COC(=O)CCCCCCC(O)C=CCC=CCC=CCC)CCCCCCCC=CCCCCCCCC	310	TRUE	TRUE	TRUE		FALSE	FALSE	null	null	100	99.2	62.9	79.5	100	669.33	190628_TT1_Hclass_Aging_021_5_12M_SPF_M_Kidney_2_Pos	914.7818:9412 915.78515:10823 916.78851:8136	79.05414:12 81.07047:48 119.08433:24 135.07787:12 135.11047:24 147.11227:24 151.11133:36 151.151:12 179.1422:193 185.13365:24 221.08583:12 231.2074:24 241.18491:12 259.20407:12 261.21176:12 261.22989:12 277.2178:332 281.04605:36 309.22488:10 331.24298:10 339.29486:36 341.00546:24 355.05389:12 355.06711:48 371.09766:36 429.09601:24 445.11288:36 517.42853:12 569.46265:24 575.52936:36 577.51715:110 …	0.530574	19.4903	0.412903	5.32045	38.0145	19.9601	13.3146	1.65394	20.6989	6.85274	11.1138	57.1266	3.40892	4.86995	72.5535	28.915	52.4007	69.1825
6519	13.29	914.78	TG 54:5;1O|TG 18:1_18:2_18:2;1O	[M+NH4]+	adduct linked to 6822_[M+H]+	0.161	TRUE	13.74	914.781	C57H100O7	OxTG	LBCBAGHQUBQNPI-UHFFFAOYSA-N	O=C(OCC(OC(=O)CCCCCCCC=CCC=CCCCCC)COC(=O)CCCCCCC(O)C=CCC=CCCCCC)CCCCCCCC=CCCCCCCCC	310	TRUE	TRUE	TRUE		FALSE	FALSE	null	null	100	97.5	52.8	87.9	100	524	190628_TT1_Hclass_Aging_036_21_18M_GF_M_Kidney_5_Pos	914.77771:11537 915.78106:10464 916.78442:10078	81.06757:12 85.06628:12 93.06664:24 109.10276:24 121.10121:24 123.11534:24 131.08723:24 135.11313:36 147.11331:12 149.13698:24 159.11028:12 161.12372:24 163.14983:48 175.11334:12 175.14862:36 177.17487:12 184.06331:36 185.13474:12 233.22916:12 237.22116:12 241.19038:36 243.20375:36 247.20706:24 259.20294:36 261.22421:154 263.23056:36 265.24918:36 277.20724:24 277.21893:60 279.22705:36 315.22852:1…	0.255744	10.64	0.169466	2.41422	12.1034	6.4962	4.25612	0.683863	12.8006	3.19467	7.0304	17.7306	1.05255	2.28031	16.7022	13.2277	31.1123	67.0026
6520	14.751	914.815	TG 55:4|TG 18:1_19:1_18:2	[M+NH4]+		0.357	TRUE	14.61	914.817	C58H104O6	TG	SIBZLFBPHPTNKZ-UHFFFAOYSA-N	O=C(OCC(OC(=O)CCCCCCCC=CCCCCCCCCC)COC(=O)CCCCCCCC=CCCCCCCCC)CCCCCCCC=CCC=CCCCCC	310	TRUE	TRUE	TRUE		FALSE	FALSE	null	null	100	99.8	69	90.7	100	112.25	190628_TT1_Hclass_Aging_014_11_24M_SPF_M_Kidney_4_Pos	914.81897:2760 915.82232:3475 916.82568:2004	81.07058:12 93.06718:6 109.0975:6 121.10494:12 135.10893:6 139.15427:5 163.14523:12 232.60701:5 261.25934:12 263.23853:18 273.21164:5 306.30042:5 333.27621:5 353.28714:6 493.07462:5 587.49347:12 593.53217:12 597.58997:6 599.50208:30 601.52734:221 603.52502:45 614.60974:12 615.53192:299 617.53876:189 618.55731:12 622.46857:5 629.54272:30 630.63458:18 631.61456:12 651.53845:5 829.72906:18 879.80945…	0.149315	2.3866	0.100509	1.23841	1.40663	1.41164	0.533311	0.169393	1.45621	1.21541	1.2266	1.87987	0.26169	2.1891	2.219	4.70543	3.57043	13.3745
6534	13.641	916.796	TG 54:4;1O|TG 18:1_18:1_18:2;1O	[M+NH4]+	ion correlated with 6302; ion correlated with 6309; adduct linked to 6395_[M+H]+	0.518	TRUE	13.8	916.796	C57H102O7	OxTG	HGKVQOVTLDCMDB-UHFFFAOYSA-N	O=C(OCC(OC(=O)CCCCCCCC=CCCCCCCCC)COC(=O)CCCCCCC(O)C=CCC=CCCCCC)CCCCCCCC=CCCCCCCCC	310	TRUE	TRUE	TRUE		FALSE	FALSE	null	null	100	99.8	70.2	73.7	100	1172.91	190628_TT1_Hclass_Aging_016_6_12M_SPF_M_Kidney_3_Pos	916.7951:19948 917.79845:17914 918.80181:9380	71.08559:12 81.067:24 95.0789:12 113.09087:12 131.08353:12 135.11264:24 145.09793:24 147.12306:12 149.12967:36 151.14987:36 153.12984:48 167.1398:12 169.15947:60 183.12943:48 183.14272:88 233.21394:24 233.23538:24 243.2014:24 245.21655:12 251.2229:12 251.23625:90 261.19464:12 261.22186:36 263.22592:36 265.2468:114 277.20721:24 278.2197:24 279.22702:160 297.23438:48 319.25238:12 337.26511:24 339.2…	0.485443	15.6395	0.383022	4.10088	37.7372	27.2348	19.5787	2.18504	12.1684	7.2424	9.89888	85.047	5.55069	3.22258	155.382	19.3096	33.0626	32.8803
6535	13.42	916.799	TG 54:4;1O|TG 18:1_18:1_18:2;1O	[M+NH4]+	ion correlated with 6308	0.268	TRUE	13.8	916.796	C57H102O7	OxTG	HGKVQOVTLDCMDB-UHFFFAOYSA-N	O=C(OCC(OC(=O)CCCCCCCC=CCCCCCCCC)COC(=O)CCCCCCC(O)C=CCC=CCCCCC)CCCCCCCC=CCCCCCCCC	310	TRUE	TRUE	TRUE		FALSE	FALSE	null	null	100	98.2	58.2	90.4	100	942.99	190628_TT1_Hclass_Aging_041_46_24M_GF_F_Kidney_2_Pos	916.79681:18346 917.80016:16100 918.80352:11896	71.08602:12 81.06614:24 89.03127:10 97.10116:24 111.11674:24 121.07471:12 121.09478:36 122.10672:12 127.10773:12 133.10605:24 135.11447:60 143.08363:10 145.10654:24 149.13324:48 159.11702:36 163.14948:60 167.10719:24 173.12811:12 183.13699:24 233.17722:12 233.22865:36 239.17834:10 243.21198:79 245.22935:12 247.24182:36 249.22485:12 261.21912:259 263.2482:24 265.25317:48 278.23318:24 279.22409:60 …	0.258439	15.8772	0.341021	3.33563	23.8421	18.2282	8.4889	1.17452	17.3577	4.61129	9.6808	43.598	2.13135	3.15833	50.6744	14.9381	46.3777	80.5073
6536	15.07	916.83	TG 55:3|TG 18:1_18:1_19:1	[M+NH4]+		0.375	TRUE	14.94	916.833	C58H106O6	TG	ASJJOPLGTKDUEX-UHFFFAOYSA-N	O=C(OCC(OC(=O)CCCCCCCC=CCCCCCCCC)COC(=O)CCCCCCCC=CCCCCCCCCC)CCCCCCCC=CCCCCCCCC	310	TRUE	TRUE	TRUE		FALSE	FALSE	null	null	100	99.8	68.9	91.3	100	112.58	190628_TT1_Hclass_Aging_020_7_18M_SPF_M_Kidney_1_Pos	916.83124:2545 917.83459:2968 918.83795:1662	79.05659:1 83.08528:4 85.09897:2 95.08257:6 97.0976:4 109.09733:2 109.10173:4 111.11445:2 116.11558:1 121.09706:4 135.11855:6 149.129:6 151.14574:4 161.13683:1 165.16039:2 177.16249:2 245.21327:2 245.22865:4 247.23451:5 263.23843:5 264.26617:4 265.24792:23 279.27036:8 327.29883:1 339.2818:6 351.30658:1 353.31348:2 355.32346:2 457.1619:4 483.17007:2 498.15085:1 499.20996:2 529.50226:2 542.12708:2 …	0.116982	2.09234	0.0938227	1.02842	1.39361	1.32119	0.550598	0.128056	1.34278	1.31374	1.2383	2.09349	0.314569	1.73383	2.14015	4.67542	3.73897	10.9862
6556	13.919	918.753	TG 56:9|TG 16:1_18:2_22:6	[M+NH4]+		0.732	TRUE	13.81	918.755	C59H96O6	TG	NPWRXJYSKONMPV-UHFFFAOYSA-N	O=C(OCC(OC(=O)CCCCCCCC=CCC=CCCCCC)COC(=O)CCCCCCCC=CCCCCCC)CCC=CCC=CCC=CCC=CCC=CCC=CCC	310	TRUE	TRUE	TRUE		FALSE	FALSE	null	null	100	99.8	44.2	82.7	100	323.6	190628_TT1_Hclass_Aging_025_36_24M_SPF_F_Kidney_5_Pos	918.7547:5332 919.75805:4894 920.76141:7103	79.05167:12 81.06797:36 91.05439:10 121.10029:12 125.12476:10 149.13091:24 157.10153:24 161.13348:24 165.16962:10 169.1042:24 171.11916:24 175.14771:48 185.13573:24 201.1422:12 201.16209:24 203.17715:36 207.17682:12 245.22244:24 259.19757:12 261.21884:24 263.24112:36 269.2258:24 287.23138:24 293.21695:24 311.22958:24 311.237:48 311.25681:36 313.27515:24 337.26678:12 337.27451:24 357.32382:10 571.…	1.11257	11.4449	0.970406	3.39822	2.68861	2.26574	3.59574	1.69573	7.16762	4.32905	4.35494	4.36642	1.38681	8.76116	2.56143	9.81839	8.71969	15.5891
6575	13.329	920.77	TG 56:8|TG 16:0_18:2_22:6	[M+NH4]+		0.018	TRUE	13.95	920.77	C59H98O6	TG	RDZINTYLBOTMAU-UHFFFAOYSA-N	O=C(OCC(OC(=O)CCCCCCCC=CCC=CCCCCC)COC(=O)CCCCCCCCCCCCCCC)CCC=CCC=CCC=CCC=CCC=CCC=CCC	410	TRUE	TRUE	TRUE		FALSE	FALSE	null	null	100	95.3	53.9	78.8	100	59.51	190628_TT1_Hclass_Aging_025_36_24M_SPF_F_Kidney_5_Pos	920.77032:1359 921.77367:1688 922.77703:2698	93.07508:10 175.15855:10 184.064:36 189.17419:10 240.09642:10 255.21182:10 269.21844:24 287.2428:10 293.22128:24 305.17175:10 313.2796:24 315.22726:10 571.47668:10 575.4787:24 575.50226:96 589.48846:10 599.49207:48 623.47406:24 623.51611:48 647.47998:12 647.52283:36 903.71472:12 920.70459:24 920.76416:63 920.80249:24	0.158072	1.9537	0.0992556	0.553919	1.98901	1.32712	0.862633	0.280375	1.29107	0.897676	0.642546	2.93089	0.23197	1.29125	3.96942	1.08512	2.78617	3.98629
6576	14.157	920.772	TG 56:8|TG 16:0_18:2_22:6	[M+NH4]+	adduct linked to 6618_[M+Na]+	0.946	TRUE	13.95	920.77	C59H98O6	TG	RDZINTYLBOTMAU-UHFFFAOYSA-N	O=C(OCC(OC(=O)CCCCCCCC=CCC=CCCCCC)COC(=O)CCCCCCCCCCCCCCC)CCC=CCC=CCC=CCC=CCC=CCC=CCC	310	TRUE	TRUE	TRUE		FALSE	FALSE	null	null	100	99.4	55	83.8	100	2000.13	190628_TT1_Hclass_Aging_QC_Pos_04	920.77057:5761 921.77392:5959 922.77728:4777	81.07164:24 91.05023:12 93.06831:24 119.0903:24 125.09469:10 133.10513:24 143.0844:12 145.10223:36 147.11548:24 159.11784:36 175.11017:12 183.11327:24 185.12956:12 189.17023:12 203.17868:24 211.16194:12 213.17104:36 215.17731:24 217.20743:10 225.17264:12 239.22949:12 239.23817:36 241.18674:24 245.22401:24 247.25412:10 269.22971:36 293.233:24 307.229:12 311.23865:60 313.27679:60 337.24008:12 337.2…	12.1408	61.3343	11.5561	24.7312	17.2982	18.9919	19.3548	15.098	38.3618	26.11	29.156	24.8249	15.2379	49.15	19.1938	55.4778	38.4801	54.2448
6577	13.214	920.772	TG 56:8|TG 16:0_18:2_22:6	[M+NH4]+	ion correlated with 6571	0.143	TRUE	13.95	920.77	C59H98O6	TG	RDZINTYLBOTMAU-UHFFFAOYSA-N	O=C(OCC(OC(=O)CCCCCCCC=CCC=CCCCCC)COC(=O)CCCCCCCCCCCCCCC)CCC=CCC=CCC=CCC=CCC=CCC=CCC	410	TRUE	TRUE	TRUE		FALSE	FALSE	null	null	100	93.4	53.9	78.8	100	77.99	190628_TT1_Hclass_Aging_025_36_24M_SPF_F_Kidney_5_Pos	920.77582:1274 921.77917:1384 922.78253:2260	93.07508:10 175.15855:10 184.064:36 189.17419:10 240.09642:10 255.21182:10 269.21844:24 287.2428:10 293.22128:24 305.17175:10 313.2796:24 315.22726:10 571.47668:10 575.4787:24 575.50226:96 589.48846:10 599.49207:48 623.47406:24 623.51611:48 647.47998:12 647.52283:36 903.71472:12 920.70459:24 920.76416:63 920.80249:24	0.204551	2.75725	0.112838	0.742372	8.8603	3.67589	1.94395	0.432245	2.64053	1.27641	1.25835	8.28637	0.441554	1.26904	11.8137	2.00956	5.77185	7.59044
6599	14.259	922.785	TG 56:7|TG 16:0_18:1_22:6	[M+NH4]+	adduct linked to 6876_[M+ACN+Na]+	0.482	TRUE	14.2	922.786	C59H100O6	TG	YGOKCUTVSFRDFI-UHFFFAOYSA-N	O=C(OCC(OC(=O)CCCCCCCC=CCCCCCCCC)COC(=O)CCCCCCCCCCCCCCC)CCC=CCC=CCC=CCC=CCC=CCC=CCC	310	TRUE	TRUE	TRUE		FALSE	FALSE	null	null	100	100	60.2	83	100	674.79	190628_TT1_Hclass_Aging_027_15_9w_GF_M_Kidney_3_Pos	922.78711:12188 923.79046:11193 924.79382:6408	81.06422:12 91.05443:12 95.08271:36 109.10042:24 117.07179:24 129.06831:12 133.10057:36 135.11385:36 147.1158:24 159.11465:36 161.13525:12 169.09872:12 171.11731:24 185.1338:24 201.16406:24 209.11819:12 211.14407:12 213.16333:36 215.17574:24 223.15216:24 227.17577:36 237.16623:12 239.23006:36 239.24741:48 265.24371:36 269.23035:36 293.20486:12 293.2265:69 311.23196:128 311.2691:24 313.27505:36 33…	6.74792	33.7179	4.48593	22.0026	13.737	12.5594	19.793	8.31465	27.306	16.5496	17.8275	25.2436	6.43458	27.7952	17.7881	50.5033	40.2929	107.308
6600	14.385	922.788	TG 56:7|TG 18:1_18:2_20:4	[M+NH4]+	adduct linked to 6875_[M+ACN+Na]+	0.643	TRUE	14.17	922.786	C59H100O6	TG	WSZCBVABHNUPSE-UHFFFAOYSA-N	O=C(OCC(OC(=O)CCCCCCCC=CCC=CCCCCC)COC(=O)CCCCCCCC=CCCCCCCCC)CCCCCCC=CCC=CCC=CCC=CCC	310	TRUE	TRUE	TRUE		FALSE	FALSE	null	null	100	99.4	65.7	90.4	100	1759.41	190628_TT1_Hclass_Aging_026_2_9w_SPF_M_Kidney_2_Pos	922.78589:43034 923.78924:44849 924.7926:34242	81.0693:36 85.09653:24 91.05847:36 93.07529:36 95.08136:36 97.10191:48 109.09751:36 119.08445:24 121.10189:48 128.05807:12 131.08636:48 133.1022:48 135.11877:36 137.13406:36 145.10089:24 147.12093:36 149.13266:48 151.14426:36 157.10509:24 159.11292:48 161.13173:60 163.14713:36 163.15968:12 171.10815:12 173.12944:24 175.14772:36 177.17023:36 183.11749:12 185.13193:48 187.13817:12 189.16295:36 199.…	8.43619	46.238	8.06123	21.4729	14.792	13.1214	19.9832	12.5027	24.8123	21.8419	22.7005	24.2161	12.8062	39.932	17.4006	51.2564	34.5967	47.2188
6613	14.466	924.797	TG 56:6|TG 18:1_18:2_20:3	[M+NH4]+		0.286	TRUE	14.44	924.802	C59H102O6	TG	PNTJFQHQNIYXAB-UHFFFAOYSA-N	O=C(OCC(OC(=O)CCCCCCCC=CCC=CCCCCC)COC(=O)CCCCCCCCCC=CCC=CCC=CCC)CCCCCCCC=CCCCCCCCC	310	TRUE	TRUE	TRUE		FALSE	FALSE	null	null	100	100	48.7	88.7	100	935.79	190628_TT1_Hclass_Aging_019_17_12M_GF_M_Kidney_2_Pos	924.79797:15359 925.80132:11817 926.80468:5512	79.05406:24 81.06659:24 83.08268:12 95.0798:24 109.09877:24 113.10674:48 129.06812:12 135.11852:24 149.12897:24 161.1368:24 163.14326:24 165.15494:24 188.1508:24 219.16417:12 227.17757:24 241.28065:10 261.22977:12 265.25247:36 271.23904:24 285.21545:12 289.24152:36 295.22617:24 305.25018:10 311.22659:24 312.2597:12 337.2662:24 339.28436:76 575.48206:60 576.48895:24 577.4967:60 577.52368:117 578.5…	5.34391	28.3364	4.99057	15.1537	12.1238	9.66201	13.4114	6.565	20.4937	11.4932	15.7704	18.1514	6.4504	18.7239	18.9911	38.4566	32.8596	78.093
6614	14.52	924.825	TG O-57:6|TG O-21:4_18:1_18:1	[M+NH4]+		0.411	TRUE	15.08	924.838	C60H106O5	EtherTG	SFXHDGPSHJGGKR-UHFFFAOYSA-N	O=C(OCC(OC(=O)CCCCCCCC=CCCCCCCCC)COCCCCCCCCC=CCC=CCC=CCC=CCC)CCCCCCCC=CCCCCCCCC	410	TRUE	TRUE	TRUE		FALSE	FALSE	null	null	100	96.1	44.4	82	100	324.12	190628_TT1_Hclass_Aging_008_43_18M_GF_F_Kidney_1_Pos	924.82617:2784 925.82952:3437 926.83288:3871	79.05472:12 85.10481:12 91.05499:24 93.07584:12 102.29861:10 107.09223:12 119.08359:24 123.11828:24 125.13178:10 131.08868:12 133.09972:48 137.13481:24 145.09492:24 147.11322:48 149.13347:36 151.1468:24 157.0901:12 157.10417:24 159.12085:12 161.13258:60 163.14621:24 171.11092:60 173.13405:48 175.14122:36 177.15996:24 185.131:24 189.12534:24 199.11258:12 199.14426:36 201.16713:12 203.17822:147 213…	1.23202	4.10546	0.815776	2.66729	3.34727	2.45406	2.21277	1.2509	3.62134	2.35435	4.82118	3.12955	1.09346	3.96735	3.99871	5.2417	8.21061	22.1113
6615	14.948	924.856	TG O-57:6|TG O-17:0_18:0_22:6	[M+NH4]+		0.839	TRUE	15.18	924.838	C60H106O5	EtherTG	MWFZYAUBEDJMBU-UHFFFAOYSA-N	O=C(OCC(OC(=O)CCC=CCC=CCC=CCC=CCC=CCC=CCC)COCCCCCCCCCCCCCCCCC)CCCCCCCCCCCCCCCCC	310	TRUE	TRUE	TRUE		FALSE	FALSE	null	null	100	99.5	42.5	83.5	100	314.86	190628_TT1_Hclass_Aging_007_28_12M_SPF_F_Kidney_1_Pos	924.85425:2368 925.8576:2125 926.86096:1328	267.26514:24 337.31036:10 525.21118:10 577.53162:24 579.53302:87 580.55023:24 623.42981:12 623.55945:332 629.34375:10 651.52948:60 651.59393:226 652.58649:24 855.72742:36 862.50525:10 889.80884:91 907.77118:24 924.81177:36	2.30125	2.61012	3.01737	1.10447	1.48292	2.34581	2.04681	0.368441	1.6864	1.79171	3.58706	1.44622	3.26032	2.04554	1.96218	3.02983	2.07759	6.56565
6627	14.676	926.815	TG 56:5|TG 18:1_18:2_20:2	[M+NH4]+		0.732	TRUE	14.56	926.817	C59H104O6	TG	ZIBZUMLEDUJDQI-UHFFFAOYSA-N	O=C(OCC(OC(=O)CCCCCCCC=CCC=CCCCCC)COC(=O)CCCCCCCCCC=CCC=CCCCCC)CCCCCCCC=CCCCCCCCC	310	TRUE	TRUE	TRUE		FALSE	FALSE	null	null	100	99.9	46.7	89.4	100	534.66	190628_TT1_Hclass_Aging_020_7_18M_SPF_M_Kidney_1_Pos	926.81659:9133 927.81994:8255 928.8233:5493	81.06533:36 95.08252:12 95.08663:36 107.08412:24 109.10168:24 121.10472:24 131.07805:12 133.09708:12 135.1136:36 141.12907:10 159.11613:12 161.12962:24 175.14737:24 189.16257:12 243.21117:12 261.21378:12 263.22238:12 263.24969:12 265.25467:48 269.21603:10 271.23199:36 287.23077:12 289.26047:36 291.34042:10 339.27646:24 345.27567:24 553.48987:12 575.47162:12 577.51331:36 578.5152:24 579.53827:24 5…	2.3603	15.5546	1.55069	10.7977	5.95028	7.22426	6.28045	2.17291	9.74142	5.86949	7.74481	10.8968	2.49571	8.31779	12.084	26.83	19.5445	59.8985
6628	14.344	926.816	TG 56:5|TG 18:1_18:2_20:2	[M+NH4]+		0.036	TRUE	14.56	926.817	C59H104O6	TG	ZIBZUMLEDUJDQI-UHFFFAOYSA-N	O=C(OCC(OC(=O)CCCCCCCC=CCC=CCCCCC)COC(=O)CCCCCCCCCC=CCC=CCCCCC)CCCCCCCC=CCCCCCCCC	310	TRUE	TRUE	TRUE		FALSE	FALSE	null	null	100	99.5	34.6	63.9	100	171.34	190628_TT1_Hclass_Aging_020_7_18M_SPF_M_Kidney_1_Pos	926.80872:3091 927.81207:3060 928.81543:2976	113.10824:12 115.08817:6 121.10167:6 123.12515:12 150.13652:12 156.0934:5 166.16992:6 173.12914:12 188.14696:6 202.16206:12 237.16586:5 289.25342:18 294.22885:5 551.47485:6 551.49133:24 570.45728:6 577.51349:12 579.51141:18 580.5083:12 581.54327:12 599.47467:18 599.48846:24 601.48273:12 601.50684:30 602.52246:36 603.52515:49 604.54596:12 605.54688:12 619.53149:6 623.50537:12 625.50763:30 626.5152…	0.417184	3.84091	0.344156	2.13962	1.81039	1.53619	1.57055	0.640279	2.87072	1.64695	2.1524	3.08683	0.684718	2.76889	3.55266	5.11877	7.74625	34.8344
6629	14.809	926.819	TG 56:5|TG 18:0_18:1_20:4	[M+NH4]+		0.5	TRUE	14.58	926.817	C59H104O6	TG	NMOSKFDAUMPINK-UHFFFAOYSA-N	O=C(OCC(OC(=O)CCCCCCCC=CCCCCCCCC)COC(=O)CCCCCCCCCCCCCCCCC)CCCCCCC=CCC=CCC=CCC=CCC	310	TRUE	TRUE	TRUE		FALSE	FALSE	null	null	100	98.9	72.6	84.1	100	736.96	190628_TT1_Hclass_Aging_023_35_24M_SPF_F_Kidney_3_Pos	926.81763:9232 927.82098:7600 928.82434:6449	71.08889:12 93.06848:12 109.10626:24 119.07981:12 129.06989:24 133.10217:12 145.10085:12 147.11919:48 157.09801:12 169.09506:24 171.11913:12 201.16405:24 203.18314:74 240.22723:10 263.23422:10 269.23032:60 275.27069:10 287.23129:60 297.25766:24 313.26016:12 337.28729:12 339.28738:60 341.28564:24 341.30121:48 551.50531:24 577.51434:190 579.53595:24 581.54077:36 601.55243:12 603.52258:60 605.53394:…	3.89477	13.4368	3.49338	10.7331	5.01997	5.36333	6.21995	3.12816	6.24018	5.19122	5.85978	7.88477	3.51275	4.55904	8.93684	26.0836	11.5265	17.7776
6640	13.128	928.763	TG 54:6;2O|TG 18:1_18:2_18:3;2O	[M+NH4]+		0.875	TRUE	13.44	928.76	C57H98O8	OxTG	JOSMXUDVJJTEGC-UHFFFAOYSA-N	O=C(OCC(OC(=O)CCCCCCCC=CCC=CCCCCC)COC(=O)CCCCCC(O)C(O)C=CCC=CCC=CCC)CCCCCCCC=CCCCCCCCC	310	TRUE	TRUE	TRUE		FALSE	FALSE	null	null	100	98.8	70.3	90.2	100	334.46	190628_TT1_Hclass_Aging_028_9_18M_SPF_M_Kidney_4_Pos	928.75836:4940 929.76171:5099 930.76507:7597	145.09569:10 184.06989:24 257.2402:10 273.1839:24 275.20532:24 289.25125:12 293.21426:209 309.20767:10 337.26901:12 339.28976:36 359.54431:10 367.2478:24 549.50323:12 551.49176:24 573.50818:12 575.50928:36 575.54297:12 579.52539:24 601.50043:107 601.51764:315 603.53253:60 605.461:24 611.44537:24 611.49048:48 613.48376:24 617.52191:36 627.45032:10 629.46942:396 630.47314:24 631.49176:255 635.79382…	0.283811	9.49687	0.193078	2.4472	12.9221	6.10029	3.8758	0.934583	13.8098	3.26568	6.44384	16.2096	1.22122	2.40008	20.0769	10.2027	23.1699	52.8465
6642	14.606	928.826	TG 56:4|TG 18:0_18:1_20:3	[M+NH4]+		0.411	TRUE	14.83	928.833	C59H106O6	TG	JRSOEXBBHGXQPU-UHFFFAOYSA-N	O=C(OCC(OC(=O)CCCCCCCC=CCCCCCCCC)COC(=O)CCCCCCCCCCCCCCCCC)CCCCCCCCCC=CCC=CCC=CCC	310	TRUE	TRUE	TRUE		FALSE	FALSE	null	null	100	99.2	38	73.4	100	187.37	190628_TT1_Hclass_Aging_043_37_9w_GF_F_Kidney_1_Pos	928.83179:2391 929.83514:2362 930.8385:2918	108.06611:10 128.05734:10 265.24213:12 281.16928:10 343.32407:10 457.13861:10 551.49854:12 575.47235:12 597.87872:10 601.48322:24 601.51074:48 603.52216:48 604.53949:60 605.5473:96 607.54822:36 608.55853:10 627.53455:24 629.51862:36 629.55731:60 630.55762:36 646.62708:10 879.73877:10 904.71399:12 911.80988:36 928.81964:77	0.401691	4.08848	0.300274	2.29711	2.43556	2.54302	1.96815	0.522109	4.00666	2.05664	3.09074	5.00301	0.928268	3.0465	6.40695	7.08573	11.0346	35.9547
6643	14.94	928.834	TG 56:4|TG 18:1_20:1_18:2	[M+NH4]+		0.768	TRUE	14.79	928.833	C59H106O6	TG	RHGAXCJSYVVFNV-UHFFFAOYSA-N	O=C(OCC(OC(=O)CCCCCCCCCC=CCCCCCCCC)COC(=O)CCCCCCCC=CCCCCCCCC)CCCCCCCC=CCC=CCCCCC	310	TRUE	TRUE	TRUE		FALSE	FALSE	null	null	100	99.8	79.8	96.8	100	484.06	190628_TT1_Hclass_Aging_047_1_9w_SPF_M_Kidney_1_Pos	928.82825:13743 929.8316:14645 930.83496:6845	73.06484:3 79.06257:3 81.07015:26 93.06669:9 95.08361:33 107.08525:12 109.10281:21 117.06817:3 121.10125:12 123.11694:12 135.11806:16 137.13168:9 149.13358:19 151.14345:9 151.14864:16 160.12254:3 163.14806:12 165.16154:15 175.1505:12 177.1618:17 181.16034:15 189.16772:9 201.16699:3 221.19125:3 245.22546:48 247.24013:17 263.23282:48 265.25372:61 273.26611:3 289.2475:15 291.2699:15 293.28256:33 319…	1.70489	13.6377	1.2782	8.88895	6.30008	9.28389	4.34082	1.43512	9.50623	5.04192	8.45169	10.805	2.71494	6.83301	14.7175	27.3236	22.5164	58.4047
6654	13.037	930.775	TG 54:5;2O|TG 18:1_18:1_18:3;2O	[M+NH4]+	ion correlated with 6417	0.25	TRUE	13.61	930.776	C57H100O8	OxTG	RJQDDMSOBKMNHU-UHFFFAOYSA-N	O=C(OCC(OC(=O)CCCCCCCC=CCCCCCCCC)COC(=O)CCCCCC(O)C(O)C=CCC=CCC=CCC)CCCCCCCC=CCCCCCCCC	410	TRUE	TRUE	TRUE		FALSE	FALSE	null	null	100	96.1	41.3	91.8	100	713.69	190628_TT1_Hclass_Aging_014_11_24M_SPF_M_Kidney_4_Pos	930.77576:3947 931.77911:2596 932.78247:2800	123.11294:10 137.12914:10 157.10506:10 164.14693:10 171.09528:12 184.05666:12 184.07188:48 194.08479:10 207.11011:10 231.37823:10 255.20534:10 261.22998:12 275.18674:12 277.2132:24 289.12958:10 293.20709:48 294.20746:24 337.27414:12 339.27423:24 371.08685:12 475.38611:10 489.35229:12 491.35953:36 493.38025:36 505.41794:10 531.37024:12 531.42523:12 555.46936:10 567.43848:10 575.50903:12 589.48163:…	0.229698	13.5599	0.186601	2.61681	19.1793	11.8343	7.48883	0.988052	15.5396	4.98456	7.96706	38.234	1.62997	3.13057	57.1016	15.122	40.8707	102.853
6656	13.249	930.779	TG 54:5;2O|TG 18:1_18:1_18:3;2O	[M+NH4]+		0.911	TRUE	13.61	930.776	C57H100O8	OxTG	RJQDDMSOBKMNHU-UHFFFAOYSA-N	O=C(OCC(OC(=O)CCCCCCCC=CCCCCCCCC)COC(=O)CCCCCC(O)C(O)C=CCC=CCC=CCC)CCCCCCCC=CCCCCCCCC	310	TRUE	TRUE	TRUE		FALSE	FALSE	null	null	100	98.4	78.5	89.5	100	955.61	190628_TT1_Hclass_Aging_032_23_24M_GF_M_Kidney_2_Pos	930.77881:2321 931.78216:2226 932.78552:4116	293.20724:105 339.30807:24 557.47589:10 601.51465:24 603.53986:162 607.45874:10 613.47382:24 631.49579:313 657.52026:24 863.5799:10 895.76941:36 913.74902:24 921.39978:10 930.76404:24	0.4338	23.9537	0.358156	5.13334	46.0226	22.4602	13.5999	2.26232	30.8723	8.151	16.5023	70.431	3.80107	4.32189	98.5733	30.1386	64.0888	104.269
6657	14.548	930.788	TG O-58:10|TG O-16:0_20:4_22:6	[M+NH4]+		0.232	TRUE	14.65	930.791	C61H100O5	EtherTG	LGRUJGUJMUBLFX-UHFFFAOYSA-N	O=C(OCC(OC(=O)CCC=CCC=CCC=CCC=CCC=CCC=CCC)COCCCCCCCCCCCCCCCC)CCCCCCC=CCC=CCC=CCC=CCC	310	TRUE	TRUE	TRUE		FALSE	FALSE	null	null	100	99.9	40.8	79.2	100	271.24	190628_TT1_Hclass_Aging_026_2_9w_SPF_M_Kidney_2_Pos	930.7915:7169 931.79485:8644 932.79821:4606	71.08423:149 74.06171:60 74.09553:48 85.09657:36 91.05181:12 99.1158:36 105.07127:10 128.06606:12 143.08479:12 149.13272:24 161.13713:24 165.16251:10 189.13022:24 203.17525:79 209.13454:24 225.2554:24 259.24509:12 269.22586:48 281.28406:24 287.2243:36 291.22375:12 295.24603:10 311.23212:48 339.28497:36 383.26816:12 385.2706:48 575.51331:36 585.52032:640 586.53937:24 599.54456:12 601.52173:333 603…	0.489933	3.34293	0.514875	3.14987	1.26895	1.4235	0.94734	0.493801	2.54211	2.25967	1.98947	1.82219	0.459309	2.66023	2.46681	3.56126	7.64993	11.1946
6659	15.293	930.845	TG 56:3|TG 18:1_18:1_20:1	[M+NH4]+		0.875	TRUE	15.13	930.848	C59H108O6	TG	QXMHHXQBBKDSSL-UHFFFAOYSA-N	O=C(OCC(OC(=O)CCCCCCCC=CCCCCCCCC)COC(=O)CCCCCCCCCC=CCCCCCCCC)CCCCCCCC=CCCCCCCCC	310	TRUE	TRUE	TRUE		FALSE	FALSE	null	null	100	99.8	80.3	92.9	100	319.78	190628_TT1_Hclass_Aging_020_7_18M_SPF_M_Kidney_1_Pos	930.84747:6845 931.85082:7862 932.85418:4027	81.06772:30 83.08766:12 95.08101:12 97.09878:12 105.59071:5 135.11337:24 147.1187:6 149.13042:12 245.22375:6 247.23621:18 265.24966:56 293.26874:6 293.27835:24 339.27591:6 339.28625:30 365.29987:6 367.31674:18 547.48407:6 566.23126:5 575.49426:39 601.52289:35 603.50336:64 603.53088:774 604.53101:18 605.5423:18 629.50647:18 629.54169:24 631.56061:1283 632.55542:18 633.5722:37 657.56842:18 659.5921…	1.12402	8.04539	0.74285	5.74649	4.272	9.80732	2.7383	0.888303	5.01583	3.64442	4.89137	9.13018	2.22321	3.57791	17.3533	15.9981	14.3299	25.9326
6660	14.898	930.851	TG 56:3|TG 18:1_18:1_20:1	[M+NH4]+		0.054	TRUE	15.13	930.848	C59H108O6	TG	QXMHHXQBBKDSSL-UHFFFAOYSA-N	O=C(OCC(OC(=O)CCCCCCCC=CCCCCCCCC)COC(=O)CCCCCCCCCC=CCCCCCCCC)CCCCCCCC=CCCCCCCCC	310	TRUE	TRUE	TRUE		FALSE	FALSE	null	null	100	99.5	31.8	69.9	100	62.07	190628_TT1_Hclass_Aging_035_16_12M_GF_M_Kidney_1_Pos	930.85089:2002 931.85424:1868 932.8576:1482	83.08103:12 401.98996:10 551.48547:12 577.50739:24 592.99634:10 601.51776:24 603.52582:60 603.54993:24 605.5199:24 629.5188:12 630.56488:36 631.55182:48 632.56427:36 633.56335:24 847.27399:10 889.79364:10 906.73718:12 913.81128:24 930.76685:24 930.8139:36 930.87384:48	0.317267	3.23966	0.243228	1.54397	2.35741	2.79659	1.45472	0.401242	2.88406	1.60598	2.72142	4.56936	1.0209	2.16848	7.92533	7.19512	10.1472	29.9536
6674	13.186	932.792	TG 54:4;2O|TG 18:1_18:1_18:2;2O	[M+NH4]+	ion correlated with 6448	0.661	TRUE	13.68	932.791	C57H102O8	OxTG	RCFJATPYSBMAHG-UHFFFAOYSA-N	O=C(OCC(OC(=O)CCCCCCCC=CCCCCCCCC)COC(=O)CCCCCC(O)C(O)C=CCC=CCCCCC)CCCCCCCC=CCCCCCCCC	310	TRUE	TRUE	TRUE		FALSE	FALSE	null	null	100	97.1	43.4	84.9	100	1305.54	190628_TT1_Hclass_Aging_007_28_12M_SPF_F_Kidney_1_Pos	932.79169:24367 933.79504:21894 934.7984:9970	83.08385:24 99.08198:24 109.10168:24 121.10015:36 133.10367:12 135.11536:126 137.13226:24 143.08629:12 149.13428:48 151.11137:72 159.11639:24 161.12988:48 163.11124:48 175.15514:24 187.14587:12 193.11458:12 195.13411:36 227.12946:24 241.17885:12 247.23293:24 259.20465:69 265.25781:65 266.25513:24 275.21292:24 277.21613:315 279.22662:24 293.20056:24 293.21017:136 294.20813:63 295.22226:48 301.2462…	0.467704	36.9604	0.293797	6.14359	68.1231	40.3755	21.0619	2.212	42.7105	12.6403	24.8922	127.972	4.94896	8.01956	178.64	44.4765	129.464	275.549
6679	15.758	932.862	TG 56:2|TG 18:0_18:1_20:1	[M+NH4]+		0.607	TRUE	15.42	932.864	C59H110O6	TG	OWMDNFFJJVRJMG-UHFFFAOYSA-N	O=C(OCC(OC(=O)CCCCCCCC=CCCCCCCCC)COC(=O)CCCCCCCCCCCCCCCCC)CCCCCCCCCC=CCCCCCCCC	310	TRUE	TRUE	TRUE		FALSE	FALSE	null	null	100	98.7	63.9	94.3	100	108.94	190628_TT1_Hclass_Aging_048_40_12M_GF_F_Kidney_1_Pos	932.86426:3991 933.86761:3892 934.87097:1922	109.10129:12 239.2394:5 263.25079:6 265.25345:24 287.10818:5 327.33267:5 339.28003:18 457.16843:12 477.98126:5 499.21036:24 533.17358:6 547.45917:12 575.49567:24 577.53058:40 601.2627:5 603.54602:450 604.52539:12 605.55048:336 631.56543:404 633.58759:711 634.55573:12 635.60596:30 655.35864:5 659.56091:18 659.60419:72 659.62579:30 661.60211:12 716.46027:5 915.83905:12 932.85614:65	0.545393	1.26191	0.379261	1.44032	1.2336	3.69517	0.834109	0.297898	0.857378	0.642758	0.838902	2.40324	0.917461	0.715423	6.00595	2.0115	2.14982	1.75431
6694	14.928	934.819	TG O-58:8|TG O-18:1_18:1_22:6	[M+NH4]+		0.107	TRUE	14.89	934.822	C61H104O5	EtherTG	CVXQYECDSJGAJQ-UHFFFAOYSA-N	O=C(OCC(OC(=O)CCC=CCC=CCC=CCC=CCC=CCC=CCC)COCCCCCCCCC=CCCCCCCCC)CCCCCCCC=CCCCCCCCC	310	TRUE	TRUE	TRUE		FALSE	FALSE	null	null	100	100	34.8	79	100	86.4	190628_TT1_Hclass_Aging_024_10_24M_SPF_M_Kidney_3_Pos	934.82166:1963 935.82501:1460 936.82837:1131	91.05685:10 139.11256:10 169.1494:10 193.19203:10 203.18065:24 251.22823:10 269.21362:12 284.29413:10 289.29614:12 297.24734:10 311.23126:24 311.24365:24 359.34158:10 430.09592:10 570.05145:10 589.55267:225 601.51678:36 603.52478:24 605.54993:36 606.5517:24 609.49957:24 609.53076:24 627.50922:12 629.5108:24 629.5495:48 631.57202:24 635.50995:24 635.53119:48 637.59161:12 649.53766:36 651.52747:24 …	0.142579	2.98926	0.130599	0.733623	1.01776	0.888205	0.58258	0.166248	1.05254	0.758381	0.579043	1.27959	0.227339	0.769358	1.53641	1.60494	2.01567	4.7766
6736	13.748	940.735	TG 58:12|TG 14:0_22:6_22:6	[M+NH4]+		0.25	TRUE	13.7	940.739	C61H94O6	TG	CFDIWPPOFAWCOJ-UHFFFAOYSA-N	O=C(OCC(OC(=O)CCC=CCC=CCC=CCC=CCC=CCC=CCC)COC(=O)CCCCCCCCCCCCC)CCC=CCC=CCC=CCC=CCC=CCC=CCC	310	TRUE	TRUE	TRUE		FALSE	FALSE	null	null	100	99.9	40.7	77.8	100	71.05	190628_TT1_Hclass_Aging_021_5_12M_SPF_M_Kidney_2_Pos	940.73486:1864 941.73821:2533 942.74157:6143	79.05081:24 141.06995:12 147.11984:24 163.14603:24 171.12172:24 201.12514:24 225.15939:24 265.25171:10 269.22461:24 293.22775:24 593.48096:12 595.47211:196 599.28577:10 603.53894:24 605.54346:36 639.46423:12 639.52808:12 641.49902:24 667.53467:24 695.49731:48 885.64307:24 923.66669:12 923.72638:24 940.73462:48 940.79919:24	0.150438	1.26191	0.179078	0.295468	0.305143	0.443361	0.490093	0.495149	0.985818	0.580849	0.650066	0.910027	0.259375	0.872467	0.587979	0.991228	0.994079	1.10296
6752	11.008	944.706	Hex2Cer 40:2;2O|Hex2Cer 18:2;2O/22:0	[M+H]+	adduct linked to 5108_[M-C6H10O4+H]+	0.214	TRUE	10.9	944.703	C52H97NO13	Hex2Cer	DBJVCFMGLSHGCI-UHFFFAOYSA-N	O=C(NC(COC1OC(CO)C(OC2OC(CO)C(O)C(O)C2O)C(O)C1O)C(O)C=CCCC=CCCCCCCCCC)CCCCCCCCCCCCCCCCCCCCC	310	TRUE	TRUE	TRUE		FALSE	FALSE	null	null	100	99.9	81.9	87.2	100	222.92	190628_TT1_Hclass_Aging_033_12_24M_SPF_M_Kidney_5_Pos	944.70148:5099 945.70483:4124 946.70819:1782	184.06187:12 224.19867:10 250.25487:48 262.25089:534 267.04672:10 280.26498:75 340.36496:24 547.40198:10 572.58289:36 584.56439:109 586.59149:24 600.96887:10 602.57983:447 610.60779:10 620.56451:24 620.58899:36 764.57159:12 764.64917:240 782.60175:12 782.63702:36 785.67041:10 926.70679:227 944.6994:24	0.0718951	5.71963	0.0970479	1.51062	0.164984	0.153913	0.144408	0.0674601	12.2568	5.41914	10.8857	0.213816	0.070843	11.1861	0.17999	8.59448	2.65173	5.37574
6757	13.971	944.767	TG 58:10|TG 18:2_18:2_22:6	[M+NH4]+		0.071	TRUE	13.88	944.77	C61H98O6	TG	YNVHIDISXOPRLL-UHFFFAOYSA-N	O=C(OCC(OC(=O)CCCCCCCC=CCC=CCCCCC)COC(=O)CCCCCCCC=CCC=CCCCCC)CCC=CCC=CCC=CCC=CCC=CCC=CCC	310	TRUE	TRUE	TRUE		FALSE	FALSE	null	null	100	99.8	66.7	90.4	100	668.21	190628_TT1_Hclass_Aging_002_4_12M_SPF_M_Kidney_1_Pos	944.76727:12551 945.77062:11206 946.77398:6650	81.06569:24 85.09931:10 95.08427:36 99.0824:24 107.08305:12 118.0868:24 121.10511:24 133.09909:24 137.1391:24 145.09929:48 149.13275:36 159.11476:36 161.13:48 173.13503:24 175.1459:24 181.08958:12 185.12622:24 189.1649:24 197.13454:12 201.13026:24 201.16409:36 203.17516:48 209.1324:10 215.17984:24 223.14793:24 225.17102:12 227.17574:36 239.21045:12 251.17313:24 261.22095:12 263.23184:60 267.21024…	2.67645	17.7559	2.08896	14.8986	3.62822	4.58189	5.5613	3.82191	10.2302	6.69706	6.0411	8.00653	3.16306	12.8039	5.66578	13.9246	10.2572	15.6151
6758	14.108	944.771	TG 58:10|TG 16:0_20:4_22:6	[M+NH4]+		0.911	TRUE	13.9	944.77	C61H98O6	TG	HCEQQESIFLFUPF-UHFFFAOYSA-N	O=C(OCC(OC(=O)CCCCCCC=CCC=CCC=CCC=CCC)COC(=O)CCCCCCCCCCCCCCC)CCC=CCC=CCC=CCC=CCC=CCC=CCC	310	TRUE	TRUE	TRUE		FALSE	FALSE	null	null	100	99.4	60.7	89.5	100	1229.01	190628_TT1_Hclass_Aging_043_37_9w_GF_F_Kidney_1_Pos	944.76984:14084 945.77319:19142 946.77655:10224	71.08863:12 81.06641:24 85.09745:36 93.0681:36 95.0864:36 105.06499:12 116.10464:12 119.08389:70 129.06615:24 131.0793:36 133.09673:48 137.13339:24 142.1189:24 145.09341:36 147.11511:36 157.10078:48 161.13806:36 163.14992:24 171.11282:68 173.13226:36 175.14871:36 185.10045:12 185.12909:36 187.15451:36 189.15234:24 197.12762:36 199.14618:75 201.16309:73 203.17815:92 205.51492:10 209.14151:12 211.1…	7.21181	15.1925	6.46624	15.1247	4.70552	12.5757	10.1372	7.0943	18.2235	13.6263	16.5374	12.7212	7.92945	18.5368	11.2437	21.9145	20.6521	19.0803
6768	12.234	946.719	Hex2Cer 40:1;2O|Hex2Cer 18:1;2O/22:0	[M+H]+	ion correlated with 7011	0.375	TRUE	11.89	946.719	C52H99NO13	Hex2Cer	QYWVASPEUXEHSY-UHFFFAOYSA-N	O=C(NC(COC1OC(CO)C(OC2OC(CO)C(O)C(O)C2O)C(O)C1O)C(O)C=CCCCCCCCCCCCCC)CCCCCCCCCCCCCCCCCCCCC	310	TRUE	TRUE	TRUE		FALSE	FALSE	null	null	100	98.7	52.7	86.3	100	185.01	190628_TT1_Hclass_Aging_030_3_9w_SPF_M_Kidney_3_Pos	946.71875:751 947.7221:575 948.72546:248	163.05922:5 240.18364:5 252.28175:6 264.27097:89 282.27539:6 446.32462:5 542.29736:5 549.50659:5 574.61432:12 579.52203:5 586.58636:24 601.51764:5 604.58783:41 604.59473:83 622.5708:6 629.48004:12 636.60437:5 748.66449:5 766.61212:6 766.65485:24 773.58606:5 784.6347:6 814.70245:5 835.64166:6 857.7298:5 912.13306:5 928.65833:12 928.68402:48 946.73895:6	0.204247	2.76883	0.128892	1.00841	0.235692	0.18323	0.146169	0.0977484	7.90192	3.41784	7.78558	0.235034	0.096144	7.18277	0.193942	5.10494	1.51528	3.44434
6772	12.953	946.777	TG 54:5;3O|TG 18:1_18:1_18:3;3O	[M+NH4]+		0.036	TRUE	13.22	946.771	C57H100O9	OxTG	ROQCADGFRKZUAC-UHFFFAOYSA-N	O=C(OCC(OC(=O)CCCCCCCC=CCCCCCCCC)COC(=O)CCCCCCCC=CCCCCCCCC)CCCCCC=CC(O)C=CC(O)C(O)CC=CCC	310	TRUE	TRUE	TRUE		FALSE	FALSE	null	null	100	99	44.9	89.8	100	131.28	190628_TT1_Hclass_Aging_QC_Pos_04	946.7771:3226 947.78045:2749 948.78381:3374	99.075:12 131.08119:10 147.11543:12 149.13055:24 161.09567:12 175.10269:12 175.10826:12 205.15952:10 239.23376:10 251.17255:10 273.17639:12 283.02969:10 291.19888:48 309.20459:12 329.27124:10 339.28647:24 353.21542:10 365.21967:12 416.26398:10 451.37134:10 479.37079:36 491.3587:12 505.35715:12 523.41333:12 531.44373:12 535.41046:24 547.41211:24 557.42792:10 561.42377:24 577.53967:24 580.14923:10 …	0.101938	3.234	0.0620609	0.511517	16.3289	4.4603	3.05465	0.387762	5.73643	1.57776	2.51002	11.5676	0.553873	0.97875	20.8158	3.93007	15.0453	38.4559
6773	14.176	946.785	TG 58:9|TG 18:1_18:2_22:6	[M+NH4]+		0.786	TRUE	14.1	946.786	C61H100O6	TG	RLAPDVQGJNAHOC-UHFFFAOYSA-N	O=C(OCC(OC(=O)CCCCCCCC=CCC=CCCCCC)COC(=O)CCCCCCCC=CCCCCCCCC)CCC=CCC=CCC=CCC=CCC=CCC=CCC	310	TRUE	TRUE	TRUE		FALSE	FALSE	null	null	100	99.9	54.8	81.7	100	898.31	190628_TT1_Hclass_Aging_014_11_24M_SPF_M_Kidney_4_Pos	946.78699:29333 947.79034:34204 948.7937:15293	79.04924:12 79.05798:48 81.0693:71 91.05176:36 93.06986:65 95.08271:104 97.06041:12 105.06544:36 107.08431:48 109.09893:72 111.11163:24 116.10815:24 117.06872:60 119.08439:48 121.09873:60 123.1144:24 128.06116:12 131.08466:48 133.10213:79 135.11215:48 137.13068:24 143.0863:36 145.10077:60 147.11571:48 151.1424:12 157.09439:48 159.11278:60 161.12802:48 163.14519:93 169.0986:36 171.11534:71 173.132…	4.65818	25.971	4.18085	11.5064	7.13922	7.79366	9.52527	7.95744	17.8298	12.7523	13.6347	13.5457	6.87111	23.2655	10.1443	27.7437	19.3587	30.4834
6775	14.205	946.818	TG O-59:9|TG O-19:1_18:2_22:6	[M+NH4]+		0.018	TRUE	14.83	946.822	C62H104O5	EtherTG	VQEFWDKOSDLEKJ-UHFFFAOYSA-N	O=C(OCC(OC(=O)CCC=CCC=CCC=CCC=CCC=CCC=CCC)COCCCCCCCCC=CCCCCCCCCC)CCCCCCCC=CCC=CCCCCC	410	TRUE	TRUE	TRUE		FALSE	FALSE	null	null	100	95.2	36.4	71.7	100	177.14	190628_TT1_Hclass_Aging_026_2_9w_SPF_M_Kidney_2_Pos	946.81775:2559 947.8211:4327 948.82446:4433	79.05784:24 83.084:24 91.0543:48 105.06386:12 105.07681:12 109.09733:24 116.10348:24 118.08646:60 121.09705:36 131.08453:48 135.1104:36 137.13219:24 141.07079:10 144.07143:12 147.10707:36 149.13242:60 155.08527:12 157.0925:36 159.11443:36 161.12788:48 163.14685:24 171.12256:48 173.1236:24 175.14743:48 177.16058:24 181.10057:12 183.11339:36 185.1297:36 189.12402:12 189.16071:36 197.12434:12 201.16…	0.334556	1.96502	0.282722	0.856118	1.2615	1.2945	0.959441	0.484366	1.6914	1.01421	1.3018	2.0764	0.434993	1.34043	2.47132	2.35707	3.63234	7.98994
6776	13.607	946.833	TG 56:3;1O|TG 18:1_18:1_20:1;1O	[M+NH4]+		0.161	TRUE	14.21	946.843	C59H108O7	OxTG	SZDFHYDXKORIPG-UHFFFAOYSA-N	O=C(OCC(OC(=O)CCCCCCCC=CCCCCCCCC)COC(=O)CCCCCCCCC(O)C=CCCCCCCCC)CCCCCCCC=CCCCCCCCC	410	TRUE	TRUE	TRUE		FALSE	FALSE	null	null	100	94.7	24.4	79.8	100	64.79	190628_TT1_Hclass_Aging_041_46_24M_GF_F_Kidney_2_Pos	946.84039:1192 947.84374:1204 948.8471:896	107.08071:10 121.09952:10 155.13866:12 203.1778:12 221.07622:10 263.23932:12 265.24655:24 279.22433:12 293.22696:10 319.22174:12 337.27475:12 339.28775:48 351.26266:10 371.34155:10 417.3739:10 447.40756:24 477.38947:10 503.41718:12 527.46405:12 527.48981:36 543.68695:10 545.48138:36 573.48462:12 595.44855:10 599.49908:24 601.50714:272 602.53656:24 603.53583:178 605.52649:24 611.99701:10 617.50433…	0.0363745	0.612565	0.0238213	0.213356	1.11824	1.50654	0.575665	0.109184	0.683901	0.4106	0.407753	2.79844	0.196075	0.205426	4.38169	0.739549	2.21174	2.9007
6783	12.933	948.786	TG 54:4;3O|TG 18:1_18:1_18:2;3O	[M+NH4]+		0.089	TRUE	13.54	948.786	C57H102O9	OxTG	AFQLTIBLPAZODT-UHFFFAOYSA-N	O=C(OCC(OC(=O)CCCCCCCC=CCCCCCCCC)COC(=O)CCCCCCCC(O)C=CC(O)C(O)CC=CCC)CCCCCCCC=CCCCCCCCC	410	TRUE	TRUE	TRUE		FALSE	FALSE	null	null	100	95.6	42.3	89.8	100	203.95	190628_TT1_Hclass_Aging_018_24_24M_GF_M_Kidney_3_Pos	948.78619:2724 949.78954:2396 950.7929:1346	88.07847:10 127.11009:10 141.84515:10 195.13963:10 211.13766:24 257.19275:10 273.16977:12 293.21405:48 311.20923:12 326.13715:10 339.2843:24 349.24765:10 475.33691:10 479.36218:36 491.3873:24 493.38623:93 509.51428:10 523.42047:12 531.42181:24 541.43127:10 545.42188:24 549.414:60 575.47516:12 595.48578:10 603.54236:133 613.44849:12 613.4624:36 629.409:12 631.49475:111 649.49506:60 727.63214:10 77…	0.0630941	1.47553	0.0403291	0.341236	14.8943	3.35412	1.44348	0.223311	2.48206	0.864901	1.30431	7.49811	0.375939	0.550448	12.9964	1.75401	7.90447	23.6572
6784	13.15	948.786	TG 54:4;3O|TG 18:1_18:1_18:2;3O	[M+NH4]+	ion correlated with 6598	0.018	TRUE	13.54	948.786	C57H102O9	OxTG	AFQLTIBLPAZODT-UHFFFAOYSA-N	O=C(OCC(OC(=O)CCCCCCCC=CCCCCCCCC)COC(=O)CCCCCCCC(O)C=CC(O)C(O)CC=CCC)CCCCCCCC=CCCCCCCCC	310	TRUE	TRUE	TRUE		FALSE	FALSE	null	null	100	98.1	22.2	65.9	100	1210.21	190628_TT1_Hclass_Aging_005_33_18M_SPF_F_Kidney_3_Pos	948.78625:36721 949.7896:41130 950.79296:17653	71.08198:24 79.05062:24 81.0669:36 83.08426:24 93.06456:12 93.06998:36 99.07255:12 99.07953:48 119.08449:12 123.1145:24 127.10714:24 131.07996:24 133.09575:24 135.11224:102 139.10799:168 145.09579:36 147.10899:24 149.12749:36 151.10973:93 151.14423:24 155.09596:12 157.09799:24 161.08891:12 163.10764:48 165.16055:24 167.11021:24 173.12933:24 175.14391:36 177.16264:24 179.1385:48 193.12607:24 195.1…	0.128433	2.95955	0.0873449	0.611801	68.3241	4.19636	2.53172	0.444376	4.42034	1.61509	1.66945	14.1716	0.629524	0.814567	24.5847	3.21665	11.0621	20.7565
6785	14.279	948.786	TG 54:4;3O|TG 18:1_20:3_16:0;3O	[M+NH4]+		0.054	TRUE	14.24	948.786	C57H102O9	OxTG	LUWFIXJCCLPFEG-UHFFFAOYSA-N	O=C(OCC(OC(=O)CCCCCCCCCC=CCC=CCC=CCC)COC(=O)CCCCCCC(OO)CCCCCCCCO)CCCCCCCC=CCCCCCCCC	310	TRUE	TRUE	TRUE		FALSE	FALSE	null	null	100	100	38.1	64.4	100	634.85	190628_TT1_Hclass_Aging_047_1_9w_SPF_M_Kidney_1_Pos	948.78625:10208 949.7896:10239 950.79296:4715	81.06499:24 83.08489:12 95.08211:24 107.08219:24 109.0968:36 117.06649:24 121.09645:48 121.783:10 131.07745:24 135.11298:36 141.07008:12 143.09048:12 145.09822:36 147.11314:36 149.12994:36 161.12886:24 163.14424:24 173.13196:36 175.15211:36 177.16156:24 185.1364:24 186.13818:24 191.17792:24 194.05812:10 197.07607:138 199.15176:24 201.16672:24 203.17778:60 217.18787:12 217.1982:24 227.18269:24 229…	1.99835	7.40736	1.71723	4.90181	2.36114	2.79214	4.01582	1.97206	5.12092	3.61893	3.47593	5.59474	2.04952	5.52034	3.94014	8.40511	5.37628	9.99611
6786	14.452	948.803	TG 58:8|TG 18:1_18:1_22:6	[M+NH4]+		0.857	TRUE	14.35	948.802	C61H102O6	TG	QFVBKJOYLFHVKV-UHFFFAOYSA-N	O=C(OCC(OC(=O)CCCCCCCC=CCCCCCCCC)COC(=O)CCCCCCCC=CCCCCCCCC)CCC=CCC=CCC=CCC=CCC=CCC=CCC	310	TRUE	TRUE	TRUE		FALSE	FALSE	null	null	100	99.9	56.8	81.2	100	534.61	190628_TT1_Hclass_Aging_021_5_12M_SPF_M_Kidney_2_Pos	948.80261:32404 949.80596:31288 950.80932:15601	71.08655:24 79.04922:24 80.04539:12 81.06928:67 83.08156:24 91.05041:36 93.06579:12 93.06985:36 95.08271:68 97.07147:24 99.08082:12 109.09896:36 111.11609:36 118.08359:65 119.0829:36 121.10032:69 127.11342:12 129.06831:36 131.08151:60 133.09734:36 135.11713:69 137.09789:12 141.06599:36 143.07968:24 145.09579:48 147.1124:48 149.13435:101 151.14423:24 157.09274:12 159.11465:106 161.12991:36 163.145…	4.21383	14.7412	3.76649	7.84034	5.00695	5.19281	6.551	5.18199	10.8223	8.18378	8.31466	8.85674	4.57457	12.8308	8.41644	16.9244	13.4562	23.718
6800	14.734	950.817	TG 58:7|TG 18:0_18:1_22:6	[M+NH4]+		0.375	TRUE	14.53	950.817	C61H104O6	TG	GPPIWOJDFFGJMA-UHFFFAOYSA-N	O=C(OCC(OC(=O)CCCCCCCC=CCCCCCCCC)COC(=O)CCCCCCCCCCCCCCCCC)CCC=CCC=CCC=CCC=CCC=CCC=CCC	310	TRUE	TRUE	TRUE		FALSE	FALSE	null	null	100	99.6	38.5	82.1	100	200.35	190628_TT1_Hclass_Aging_047_1_9w_SPF_M_Kidney_1_Pos	950.81573:7348 951.81908:5535 952.82244:4076	81.06885:18 85.09994:12 91.05394:6 95.63988:5 105.07064:12 107.0881:6 117.06963:12 121.10274:12 128.06052:6 129.07239:12 133.09659:18 135.118:18 143.08223:6 145.09836:18 147.11327:12 157.09889:12 159.11729:12 161.13078:18 163.14796:12 171.10716:18 171.11633:18 173.1395:12 175.14484:12 181.10359:6 185.13464:18 189.15991:12 197.13336:18 201.16092:12 203.17796:30 211.12247:6 211.1449:12 213.16824:24…	1.30836	3.86354	1.20778	2.90219	1.47734	2.04035	2.05977	1.2181	2.94578	2.06848	2.31116	2.45878	1.21389	3.00922	2.29334	5.59018	3.37092	4.15998
6801	14.507	950.819	TG 58:7|TG 18:1_18:2_22:4	[M+NH4]+	ion correlated with 6794; ion correlated with 6798	0.25	TRUE	14.5	950.817	C61H104O6	TG	ABENPAILMZUZDF-UHFFFAOYSA-N	O=C(OCC(OC(=O)CCCCCCCC=CCC=CCCCCC)COC(=O)CCCCCCCCC=CCC=CCC=CCC=CCC)CCCCCCCC=CCCCCCCCC	310	TRUE	TRUE	TRUE		FALSE	FALSE	null	null	100	100	45.2	82.4	100	127.15	190628_TT1_Hclass_Aging_036_21_18M_GF_M_Kidney_5_Pos	950.81702:2338 951.82037:1845 952.82373:1158	121.09672:12 133.10648:12 135.11491:24 139.14709:10 149.12688:12 183.16418:10 203.1723:12 257.21906:10 285.19809:12 311.19604:10 319.27267:10 341.27905:12 371.28299:12 387.27927:12 564.39929:10 585.49054:10 599.5968:12 601.49835:84 601.52936:60 603.52704:82 604.53058:36 605.55219:24 619.50891:10 627.53955:36 628.56635:24 629.5412:24 638.58276:10 648.50677:24 649.50769:48 651.52972:113 653.54773:6…	1.40109	4.90193	1.3762	3.53283	2.17135	2.60382	2.88956	1.73392	4.65053	2.78498	3.51938	4.14853	1.57979	4.21481	4.00772	7.56683	7.3094	14.6511
6813	14.808	952.829	TG 58:6|TG 18:1_18:1_22:4	[M+NH4]+		0.732	TRUE	14.71	952.833	C61H106O6	TG	MLZUUSCOTWOREA-UHFFFAOYSA-N	O=C(OCC(OC(=O)CCCCCCCC=CCCCCCCCC)COC(=O)CCCCCCCCC=CCC=CCC=CCC=CCC)CCCCCCCC=CCCCCCCCC	310	TRUE	TRUE	TRUE		FALSE	FALSE	null	null	100	99.9	34.8	86.8	100	112.51	190628_TT1_Hclass_Aging_027_15_9w_GF_M_Kidney_3_Pos	952.83484:1289 953.83819:1108 954.84155:799	76.04316:10 113.10261:12 147.11771:10 199.14149:10 251.18246:10 265.24179:12 269.21921:12 314.24982:12 325.13791:10 341.30426:36 379.43506:10 401.16632:12 568.22235:10 575.47681:12 601.48792:12 603.52686:67 603.54413:48 605.56927:36 607.54602:36 615.84021:10 627.52191:12 629.54114:48 631.57068:24 651.50824:12 651.53687:36 653.53339:36 653.57642:48 655.56165:24 677.44464:10 905.58661:10 917.3761:1…	0.887359	2.74735	0.784224	2.27019	1.34337	1.68892	1.63364	0.842024	2.25521	1.50402	1.99949	2.23021	0.723702	1.89484	2.40148	4.80029	3.82497	7.52965
6819	14.441	954.795	TG O-60:12|TG O-16:0_22:6_22:6	[M+NH4]+		0.357	TRUE	14.63	954.791	C63H100O5	EtherTG	VNLIPCSMIGFIDY-UHFFFAOYSA-N	O=C(OCC(OC(=O)CCC=CCC=CCC=CCC=CCC=CCC=CCC)COCCCCCCCCCCCCCCCC)CCC=CCC=CCC=CCC=CCC=CCC=CCC	310	TRUE	TRUE	TRUE		FALSE	FALSE	null	null	100	99.6	51.8	63.1	100	97.21	190628_TT1_Hclass_Aging_021_5_12M_SPF_M_Kidney_2_Pos	954.78943:3413 955.79278:4792 956.79614:2176	71.08312:36 83.08426:10 95.08287:10 105.06851:24 143.11685:12 155.17839:24 157.73207:10 169.19939:24 171.11761:24 199.14751:12 201.16243:24 227.17406:24 293.20776:12 293.22217:36 309.17386:12 309.21829:36 311.23001:48 335.26797:10 342.33429:10 385.25455:12 603.51324:12 609.51923:446 610.52771:24 671.49402:82 681.578:10 695.47699:36 695.50293:36 853.73383:12 924.79901:24 937.7392:48 937.77356:24 9…	0.136292	4.92598	0.161525	0.749776	0.340495	0.341047	0.31117	0.185119	0.999163	0.977793	0.786262	0.504147	0.170215	1.16673	0.358194	1.74627	1.4378	1.80642
6820	15.146	954.844	TG 58:5|TG 18:0_18:1_22:4	[M+NH4]+		0.161	TRUE	14.98	954.848	C61H108O6	TG	XXQLXVNLMLDWDQ-UHFFFAOYSA-N	O=C(OCC(OC(=O)CCCCCCCC=CCCCCCCCC)COC(=O)CCCCCCCCCCCCCCCCC)CCCCCCCCC=CCC=CCC=CCC=CCC	310	TRUE	TRUE	TRUE		FALSE	FALSE	null	null	100	99.4	35.2	79.5	100	95.51	190628_TT1_Hclass_Aging_042_26_9w_SPF_F_Kidney_2_Pos	954.85529:1627 955.85864:1343 956.862:871	91.05269:12 95.09049:24 106.07416:10 129.06131:12 137.12677:10 177.13377:12 181.8049:10 199.15002:10 203.18204:36 217.19017:12 231.17644:12 239.24388:10 277.13934:10 297.26077:12 315.26569:36 335.87714:10 363.23679:10 400.17181:10 531.42566:10 573.50153:10 597.54938:10 599.49921:12 603.55316:12 605.5473:60 607.57239:36 608.58618:48 609.59045:36 625.51147:24 625.53955:12 631.56921:24 633.59137:48 …	0.400344	0.887016	0.328066	0.923423	0.481902	0.714716	0.527261	0.242632	0.607171	0.484344	0.604945	0.803216	0.287937	0.440993	1.17145	1.62333	1.2039	1.82379
6836	11.695	958.721	Hex2Cer 41:2;2O|Hex2Cer 18:2;2O/23:0	[M+H]+		0.304	TRUE	11.32	958.719	C53H99NO13	Hex2Cer	KJZCOAROERXSJX-UHFFFAOYSA-N	O=C(NC(COC1OC(CO)C(OC2OC(CO)C(O)C(O)C2O)C(O)C1O)C(O)C=CCCC=CCCCCCCCCC)CCCCCCCCCCCCCCCCCCCCCC	310	TRUE	TRUE	TRUE		FALSE	FALSE	null	null	100	98.5	70.2	84.5	100	94.96	190628_TT1_Hclass_Aging_032_23_24M_GF_M_Kidney_2_Pos	958.71997:1767 959.72332:1251 960.72668:644	248.25288:6 250.24886:18 262.25839:135 264.27328:18 265.97998:12 280.2587:24 280.28217:6 557.22723:5 586.59674:30 598.56189:6 598.58588:55 600.60968:12 616.59845:167 634.62354:12 639.61743:18 778.64856:88 796.62909:6 796.65283:12 824.66962:6 838.6828:12 923.57721:6 940.71741:83 941.71185:12 958.43658:12	0.0130718	1.44128	0.024262	0.416515	0.0955172	0.0659628	0.0651598	0.0330417	2.78229	1.78555	2.21911	0.102827	0.046807	4.2134	0.100459	2.22906	0.715726	1.1187
6839	13.332	958.825	TG 56:5;2O|TG 18:1_20:1_18:3;2O	[M+NH4]+	ion correlated with 6833	0.125	TRUE	13.67	958.807	C59H104O8	OxTG	RUAOKIIJBROXKH-UHFFFAOYSA-N	O=C(OCC(OC(=O)CCCCCCCCCC=CCCCCCCCC)COC(=O)CCCCCC(O)C(O)C=CCC=CCC=CCC)CCCCCCCC=CCCCCCCCC	310	TRUE	TRUE	TRUE		FALSE	FALSE	null	null	100	98.3	48.3	69.7	100	132.37	190628_TT1_Hclass_Aging_017_18_12M_GF_M_Kidney_3_Pos	958.81128:1454 959.81463:1113 960.81799:1894	109.06204:10 149.12709:12 265.24521:36 293.20398:105 349.22348:10 519.40173:24 564.33978:10 599.51831:12 603.5379:123 613.50305:24 629.52417:24 629.55231:48 631.47253:97 631.49371:264 631.57483:24 641.4729:12 641.48706:36 641.5191:36 659.49847:24 661.46747:12 905.75128:36 913.78833:12 923.73645:24 958.78558:48	0.0608487	1.45007	0.035941	0.352677	2.00576	1.31377	0.733843	0.146029	1.31276	0.597237	0.872325	4.16348	0.230813	0.344228	4.22174	1.49846	5.00135	9.89189
6848	12.841	960.734	Hex2Cer 41:1;2O|Hex2Cer 18:1;2O/23:0	[M+H]+		0.339	TRUE	12.29	960.735	C53H101NO13	Hex2Cer	JMIBHWXICSSLDW-UHFFFAOYSA-N	O=C(NC(COC1OC(CO)C(OC2OC(CO)C(O)C(O)C2O)C(O)C1O)C(O)C=CCCCCCCCCCCCCC)CCCCCCCCCCCCCCCCCCCCCC	410	TRUE	TRUE	TRUE		FALSE	FALSE	null	null	100	96.2	58.7	84.4	100	97.18	190628_TT1_Hclass_Aging_016_6_12M_SPF_M_Kidney_3_Pos	960.73541:2210 961.73876:1750 962.74212:1020	247.23119:12 250.26526:12 264.26733:221 277.21655:10 282.28583:24 307.26019:10 588.58844:12 600.57379:12 600.61163:79 600.63226:36 615.49646:24 617.52069:48 618.62305:290 623.5047:10 631.47998:24 645.42059:12 762.65723:10 780.62183:60 780.6767:122 798.6568:12 798.70038:36 895.70056:12 925.71783:12 942.70123:128 960.75214:24	0.233659	2.11539	0.207743	0.930683	0.682266	0.337143	0.438508	0.264334	3.81539	2.98038	3.3143	0.461907	0.253011	5.53892	0.544155	3.66534	1.21706	2.01252
6901	10.092	968.705	Hex2Cer 42:4;2O|Hex2Cer 18:2;2O/24:2	[M+H]+		0.143	TRUE	10.81	968.703	C54H97NO13	Hex2Cer	ZINWTSJUDFPVFH-UHFFFAOYSA-N	O=C(NC(COC1OC(CO)C(OC2OC(CO)C(O)C(O)C2O)C(O)C1O)C(O)C=CCCC=CCCCCCCCCC)CCCCCCCCCCCC=CCC=CCCCCCCC	410	TRUE	TRUE	TRUE		FALSE	FALSE	null	null	96.8	94.1	35.1	68.6	100	76.59	190628_TT1_Hclass_Aging_018_24_24M_GF_M_Kidney_3_Pos	968.69501:601 969.69836:551 970.70172:621	119.08113:12 147.1104:12 151.10944:10 169.09656:12 178.66341:10 201.16565:10 247.15932:12 250.24844:24 262.25339:48 273.25308:10 293.23547:12 329.2485:10 596.57819:10 609.50647:24 612.58649:12 626.56744:12 626.6026:24 731.55438:10 788.59253:12 815.65466:10 910.70825:10 950.67902:12	0.0310456	0.891237	0.0409421	0.209254	0.0471383	0.0234534	0.0387436	0.0468091	2.39574	0.819865	1.82674	0.0081609	0.0290962	1.88069	0.0404628	1.43628	0.446523	0.855393
6903	14.023	968.77	TG 60:12|TG 16:0_22:6_22:6	[M+NH4]+		0.946	TRUE	13.84	968.77	C63H98O6	TG	VLEDHTUUVAXNOJ-UHFFFAOYSA-N	O=C(OCC(OC(=O)CCC=CCC=CCC=CCC=CCC=CCC=CCC)COC(=O)CCCCCCCCCCCCCCC)CCC=CCC=CCC=CCC=CCC=CCC=CCC	310	TRUE	TRUE	TRUE		FALSE	FALSE	null	null	100	99.6	64	83	100	475.94	190628_TT1_Hclass_Aging_033_12_24M_SPF_M_Kidney_5_Pos	968.77301:4079 969.77636:5582 970.77972:3438	79.05496:12 91.05786:12 95.08346:24 116.10439:12 119.08822:24 123.11518:10 131.08865:24 135.11783:24 143.09045:12 161.09496:12 171.12531:24 183.1067:12 197.12917:12 208.03053:10 213.16182:24 225.11472:12 269.233:24 309.22537:12 311.22968:36 313.27527:67 369.37:10 621.47107:12 623.50507:300 671.12781:10 695.4964:139 850.75189:10 883.771:12 951.75134:36 963.87579:10 968.75232:115	2.83564	17.1094	2.92459	4.38222	2.5993	3.84345	4.25612	4.20832	8.73892	6.50405	7.28274	6.57527	3.87402	8.92851	3.80272	15.7977	9.27692	7.16489
6910	10.951	970.718	Hex2Cer 42:3;2O|Hex2Cer 18:2;2O/24:1	[M+H]+	adduct linked to 7003_[M+2Na-H]+; adduct linked to 6981_[M+NH4]+	0.357	TRUE	11.05	970.719	C54H99NO13	Hex2Cer	TWGRHSXCHVSAFR-UHFFFAOYSA-N	O=C(NC(COC1OC(CO)C(OC2OC(CO)C(O)C(O)C2O)C(O)C1O)C(O)C=CCCC=CCCCCCCCCC)CCCCCCCCCCCC=CCCCCCCCCCC	310	TRUE	TRUE	TRUE		FALSE	FALSE	null	null	100	99.9	82.2	89	100	724.83	190628_TT1_Hclass_Aging_018_24_24M_GF_M_Kidney_3_Pos	970.71967:13572 971.72302:11161 972.72638:5320	250.23906:12 250.25903:60 262.25061:923 263.25137:48 264.25861:24 280.26236:147 333.24707:10 366.35703:12 366.37314:24 390.36703:12 598.58704:70 610.55188:24 610.59344:377 611.59589:36 612.60266:36 626.58026:24 628.59796:1135 629.59045:60 646.59644:60 646.61786:71 784.59259:10 790.64124:398 791.65161:36 808.67511:60 809.65302:24 952.70728:777 953.68634:36 970.70892:24	0.0408495	10.3516	0.0439748	1.67802	0.0955172	0.0395777	0.0545933	0.0206511	39.2371	13.6104	35.536	0.0897699	0.0417468	30.1699	0.078135	19.3666	7.34425	19.3168
6911	14.098	970.787	TG 60:11|TG 18:1_20:4_22:6	[M+NH4]+		0.786	TRUE	13.98	970.786	C63H100O6	TG	YDCWNPRKDZMBHL-UHFFFAOYSA-N	O=C(OCC(OC(=O)CCCCCCC=CCC=CCC=CCC=CCC)COC(=O)CCCCCCCC=CCCCCCCCC)CCC=CCC=CCC=CCC=CCC=CCC=CCC	310	TRUE	TRUE	TRUE		FALSE	FALSE	null	null	100	99.8	49.7	85.2	100	275.79	190628_TT1_Hclass_Aging_044_34_24M_SPF_F_Kidney_2_Pos	970.78461:5191 971.78796:6121 972.79132:3623	71.08283:12 91.05149:12 91.05685:12 97.10021:12 121.09682:12 126.04581:10 131.08588:24 133.10172:24 137.1319:12 143.08588:12 147.11015:24 159.11229:24 159.12822:12 161.13821:36 177.12096:24 184.07498:24 191.17842:12 201.16724:48 207.12141:10 215.18102:24 223.1575:12 227.18327:12 253.1909:10 269.21533:24 271.3353:10 274.05789:12 287.22763:12 293.21313:12 293.21555:48 309.23361:12 311.22559:24 337.…	1.5915	8.26609	1.43325	3.33832	1.64852	2.71948	3.47646	2.66087	5.4145	3.76459	4.38084	5.08633	2.28111	6.15486	2.97594	8.61033	7.01015	6.8175
6912	14.262	970.835	TG O-61:11|TG O-17:0_22:5_22:6	[M+NH4]+		0.143	TRUE	14.84	970.822	C64H104O5	EtherTG	ZWJJQJLJVNAHPQ-UHFFFAOYSA-N	O=C(OCC(OC(=O)CCC=CCC=CCC=CCC=CCC=CCC=CCC)COCCCCCCCCCCCCCCCCC)CCCCCC=CCC=CCC=CCC=CCC=CCC	410	TRUE	TRUE	TRUE		FALSE	FALSE	null	null	100	96.1	46.3	80.6	100	74.42	190628_TT1_Hclass_Aging_016_6_12M_SPF_M_Kidney_3_Pos	970.83478:1729 971.83813:1521 972.84149:2207	99.08945:10 113.1087:36 116.10394:160 135.11745:24 142.12492:24 159.11151:12 197.12514:12 203.17365:12 223.14432:12 223.1506:24 259.14847:10 339.30115:24 617.45056:10 623.50079:132 625.52405:128 626.50708:36 649.5119:65 669.48523:12 671.50897:24 697.49194:36 697.53644:24 927.76764:60 953.7359:24 970.77649:92	0.0846493	1.10347	0.0576727	0.489306	1.32849	0.698405	0.434774	0.119968	1.56797	0.477971	0.934992	1.27318	0.156706	0.640867	1.39673	1.67367	2.72082	10.3261
6921	10.912	972.723	Hex2Cer 42:2;2O|Hex2Cer 18:1;2O/24:1	[M+H]+		0.018	TRUE	11.99	972.735	C54H101NO13	Hex2Cer	WIZXUCJFWCOBSF-UHFFFAOYSA-N	O=C(NC(COC1OC(CO)C(OC2OC(CO)C(O)C(O)C2O)C(O)C1O)C(O)C=CCCCCCCCCCCCCC)CCCCCCCCCCCC=CCCCCCCCCCC	410	TRUE	TRUE	TRUE		FALSE	FALSE	null	null	100	86.5	63	88	100	94.14	190628_TT1_Hclass_Aging_035_16_12M_GF_M_Kidney_1_Pos	972.7229:1557 973.72625:675 974.72961:288	184.0789:101 213.16055:10 252.27213:10 262.25079:85 263.25385:36 264.26337:24 268.2955:10 599.60419:10 610.60443:24 612.58588:36 628.54224:12 629.58746:36 629.6192:48 630.61249:135 635.5835:10 737.60046:10 790.55524:12 792.65552:36 792.68317:72 796.63074:10 810.67627:24 914.62:10 954.69287:48 954.71454:91	0.0261437	2.81432	0.0333602	0.444416	0.0781504	0.0483727	0.0545933	0.0481858	8.28568	2.16498	7.08277	0.0554941	0.0328914	6.80077	0.0558107	2.81783	1.47014	4.2485
6922	12.271	972.735	Hex2Cer 42:2;2O|Hex2Cer 18:2;2O/24:0	[M+H]+	adduct linked to 7011_[M+Na]+	0.25	TRUE	12.08	972.735	C54H101NO13	Hex2Cer	UMPWVICMWOGJNA-UHFFFAOYSA-N	O=C(NC(COC1OC(CO)C(OC2OC(CO)C(O)C(O)C2O)C(O)C1O)C(O)C=CCCC=CCCCCCCCCC)CCCCCCCCCCCCCCCCCCCCCCC	310	TRUE	TRUE	TRUE		FALSE	FALSE	null	null	100	99.2	76.3	89.2	100	630.57	190628_TT1_Hclass_Aging_016_6_12M_SPF_M_Kidney_3_Pos	972.73267:14895 973.73602:11874 974.73938:4191	250.24098:12 250.25208:85 252.26497:36 262.25488:525 264.27206:368 280.25043:12 280.2598:48 282.27893:36 357.21625:10 399.23032:10 586.60236:12 600.59821:60 604.59033:36 612.60736:261 614.60596:36 614.63727:48 628.56763:36 630.62024:1189 631.61786:48 637.12402:12 641.82196:10 648.64038:60 766.66583:24 792.61346:24 792.66479:414 809.64331:12 810.67377:72 928.68787:24 954.64728:24 954.72101:680 955…	0.0898688	16.278	0.148605	4.78096	0.249337	0.149516	0.158497	0.0881112	39.1022	18.0817	29.7554	0.166482	0.0796983	25.8063	0.196733	24.7037	11.0809	16.9911
6923	12.577	972.735	Hex2Cer 42:2;2O|Hex2Cer 18:2;2O/24:0	[M+H]+		0.25	TRUE	12.08	972.735	C54H101NO13	Hex2Cer	UMPWVICMWOGJNA-UHFFFAOYSA-N	O=C(NC(COC1OC(CO)C(OC2OC(CO)C(O)C(O)C2O)C(O)C1O)C(O)C=CCCC=CCCCCCCCCC)CCCCCCCCCCCCCCCCCCCCCCC	310	TRUE	TRUE	TRUE		FALSE	FALSE	null	null	100	97.2	76.9	84.8	100	705.13	190628_TT1_Hclass_Aging_028_9_18M_SPF_M_Kidney_4_Pos	972.72986:11206 973.73321:8116 974.73657:3097	182.07181:5 221.15187:5 250.24583:67 262.25534:649 263.24701:12 264.26337:90 280.26263:94 282.28174:12 359.21396:5 368.38562:63 600.57172:6 600.60956:71 612.61194:257 614.61053:33 628.6109:18 630.6178:936 631.61542:18 648.59149:6 648.6272:132 648.64508:71 653.61481:12 762.65509:5 776.58301:12 790.06488:6 792.67407:422 793.69763:12 810.67511:43 810.70312:39 838.70776:12 866.59302:6 949.60486:5 954…	0.0915028	13.503	0.0955315	4.27078	0.208401	0.117267	0.227179	0.0633299	42.2488	18.8331	34.6866	0.156689	0.0657828	29.858	0.178594	28.719	10.5134	17.9533
6924	12.487	972.738	Hex2Cer 42:2;2O|Hex2Cer 18:2;2O/24:0	[M+H]+	adduct linked to 6992_[M+NH4]+	0.268	TRUE	12.08	972.735	C54H101NO13	Hex2Cer	UMPWVICMWOGJNA-UHFFFAOYSA-N	O=C(NC(COC1OC(CO)C(OC2OC(CO)C(O)C(O)C2O)C(O)C1O)C(O)C=CCCC=CCCCCCCCCC)CCCCCCCCCCCCCCCCCCCCCCC	310	TRUE	TRUE	TRUE		FALSE	FALSE	null	null	100	99	79.6	87	100	665.79	190628_TT1_Hclass_Aging_004_14_9w_GF_M_Kidney_2_Pos	972.73267:2404 973.73602:1703 974.73938:842	209.17761:10 250.24065:24 262.24997:141 264.26938:48 274.67328:10 280.25467:24 350.2406:10 368.38959:24 541.35089:10 600.59302:24 612.5882:66 630.61481:334 648.63123:24 792.62262:12 792.65033:131 810.659:24 825.54462:10 954.64386:12 954.71759:141 972.78186:24	0.148692	11.6791	0.13799	4.79092	0.310121	0.102609	0.199001	0.108762	36.6063	12.5078	35.615	0.158321	0.134096	33.6142	0.221848	18.9835	8.24374	19.5203
6925	12.177	972.739	Hex2Cer 42:2;2O|Hex2Cer 18:1;2O/24:1	[M+H]+	adduct linked to 7011_[M+Na]+	0.143	TRUE	11.99	972.735	C54H101NO13	Hex2Cer	WIZXUCJFWCOBSF-UHFFFAOYSA-N	O=C(NC(COC1OC(CO)C(OC2OC(CO)C(O)C(O)C2O)C(O)C1O)C(O)C=CCCCCCCCCCCCCC)CCCCCCCCCCCC=CCCCCCCCCCC	310	TRUE	TRUE	TRUE		FALSE	FALSE	null	null	100	99.4	92.4	94.3	100	702.65	190628_TT1_Hclass_Aging_014_11_24M_SPF_M_Kidney_4_Pos	972.73676:19221 973.74011:16046 974.74347:6024	78.81628:10 247.23502:24 250.25136:36 252.26869:85 262.24957:357 264.26672:1616 266.28012:24 280.24957:12 282.26392:24 282.28043:108 349.34271:12 366.35867:24 600.58234:12 600.59949:72 600.62701:36 612.53918:12 612.60516:405 614.5968:24 614.61768:48 630.61444:1376 631.6156:24 648.61658:48 648.63446:48 792.65393:594 806.65259:12 810.67468:60 954.71735:3182 955.71912:24 964.63245:10 969.69873:12 97…	0.0882348	15.1117	0.0712695	2.92159	0.171187	0.0864846	0.151452	0.0881112	28.6112	11.4811	29.2351	0.181172	0.046807	24.4744	0.186966	12.0475	6.58822	16.8502
6926	14.266	972.804	TG 60:10|TG 18:0_20:4_22:6	[M+NH4]+		0.161	TRUE	14.21	972.802	C63H102O6	TG	RXVLBDOYHGQIHF-UHFFFAOYSA-N	O=C(OCC(OC(=O)CCCCCCC=CCC=CCC=CCC=CCC)COC(=O)CCCCCCCCCCCCCCCCC)CCC=CCC=CCC=CCC=CCC=CCC=CCC	310	TRUE	TRUE	TRUE		FALSE	FALSE	null	null	100	99.9	53.2	72.8	100	89.29	190628_TT1_Hclass_Aging_002_4_12M_SPF_M_Kidney_1_Pos	972.80188:2272 973.80523:2229 974.80859:1535	116.10099:12 116.10402:24 118.08548:36 133.10094:12 163.14388:12 175.14249:24 203.16949:12 203.17349:24 263.23456:10 300.24835:10 341.29886:24 617.5083:24 623.49921:36 625.50494:48 627.53497:184 629.55774:24 649.49951:24 651.51434:36 651.52869:60 671.46729:12 671.48541:24 673.53412:36 903.72784:24 955.76654:36 972.76385:60 972.82947:60	0.766335	3.2142	0.586548	2.39538	1.04753	1.47688	1.93012	0.933685	2.58381	1.58413	1.59258	2.41819	0.607137	2.40484	2.01625	4.30371	4.00039	4.93292
6928	14.412	972.804	TG 60:10|TG 18:0_20:4_22:6	[M+NH4]+		0.607	TRUE	14.21	972.802	C63H102O6	TG	RXVLBDOYHGQIHF-UHFFFAOYSA-N	O=C(OCC(OC(=O)CCCCCCC=CCC=CCC=CCC=CCC)COC(=O)CCCCCCCCCCCCCCCCC)CCC=CCC=CCC=CCC=CCC=CCC=CCC	310	TRUE	TRUE	TRUE		FALSE	FALSE	null	null	100	99.5	60.8	82.8	100	221.52	190628_TT1_Hclass_Aging_026_2_9w_SPF_M_Kidney_2_Pos	972.80481:5067 973.80816:5812 974.81152:4733	71.08893:10 84.07832:24 85.09912:24 103.05727:10 113.10248:12 116.10065:36 116.11275:36 133.10384:36 142.11958:48 147.11752:24 149.13266:24 157.10156:12 161.12994:24 177.16089:24 185.13765:24 187.15161:24 199.13332:12 201.16808:24 203.17717:72 204.19048:24 227.18427:24 265.24374:10 269.22806:73 283.22644:12 287.23846:36 293.21451:24 311.23447:36 339.28226:12 341.3064:140 361.27609:12 385.27594:48…	1.42377	2.18712	1.35447	2.32942	1.32104	1.70968	1.44176	1.56722	2.84903	2.2105	2.5284	2.666	1.58288	2.55236	1.99823	4.79739	3.34341	3.0136
6929	14.539	972.854	TG O-61:10|TG O-21:4_18:0_22:6	[M+NH4]+	ion correlated with 6908; ion correlated with 6871	0.536	TRUE	14.97	972.838	C64H106O5	EtherTG	RNYNAKWFKYIIKY-UHFFFAOYSA-N	O=C(OCC(OC(=O)CCC=CCC=CCC=CCC=CCC=CCC=CCC)COCCCCCCCCC=CCC=CCC=CCC=CCC)CCCCCCCCCCCCCCCCC	310	TRUE	TRUE	TRUE		FALSE	FALSE	null	null	100	97.8	34.9	81.3	100	87.33	190628_TT1_Hclass_Aging_026_2_9w_SPF_M_Kidney_2_Pos	972.84894:2111 973.85229:2103 974.85565:2743	71.08893:10 84.07832:24 85.09912:24 103.05727:10 113.10248:12 116.10065:36 116.11275:36 133.10384:36 142.11958:48 147.11752:24 149.13266:24 157.10156:12 161.12994:24 177.16089:24 185.13765:24 187.15161:24 199.13332:12 201.16808:24 203.17717:72 204.19048:24 227.18427:24 265.24374:10 269.22806:73 283.22644:12 287.23846:36 293.21451:24 311.23447:36 339.28226:12 341.3064:140 361.27609:12 385.27594:48…	0.150438	1.89853	0.108868	0.851406	2.35369	1.69041	0.79262	0.239487	1.9633	0.837588	1.44635	2.25798	0.407975	1.03506	3.76667	3.13244	5.44163	14.0779
6939	12.361	974.747	Hex2Cer 42:1;2O|Hex2Cer 18:1;2O/24:0	[M+H]+		0.018	TRUE	12.65	974.75	C54H103NO13	Hex2Cer	KDEYEEYMIPNKIJ-UHFFFAOYSA-N	O=C(NC(COC1OC(CO)C(OC2OC(CO)C(O)C(O)C2O)C(O)C1O)C(O)C=CCCCCCCCCCCCCC)CCCCCCCCCCCCCCCCCCCCCCC	310	TRUE	TRUE	TRUE		FALSE	FALSE	null	null	100	99	52.8	82.6	100	65.87	190628_TT1_Hclass_Aging_002_4_12M_SPF_M_Kidney_1_Pos	974.74683:1502 975.75018:512 976.75354:317	252.26398:12 262.2334:6 262.2561:40 263.2478:24 264.26871:38 265.27103:37 280.25397:6 368.3833:6 499.19421:12 600.59161:6 614.58185:24 614.59576:38 614.62012:30 630.58875:12 630.60986:24 631.60394:53 631.63568:41 632.61993:122 650.63971:12 652.5918:12 653.59229:24 777.56305:12 777.61389:18 793.65228:18 794.67249:70 801.3634:5 836.67102:12 956.69788:30 956.72827:71 974.80713:12	0.0555553	3.10589	0.0394257	1.01638	0.133972	0.0923479	0.0862927	0.0495625	6.19723	3.34791	3.7311	0.0979308	0.0354215	4.137	0.104645	4.85782	2.23422	2.82379
6940	13.022	974.752	Hex2Cer 42:1;2O|Hex2Cer 18:1;2O/24:0	[M+H]+	adduct linked to 7019_[M+Na]+; adduct linked to 6825_[M+H-H2O]+	0.911	TRUE	12.65	974.75	C54H103NO13	Hex2Cer	KDEYEEYMIPNKIJ-UHFFFAOYSA-N	O=C(NC(COC1OC(CO)C(OC2OC(CO)C(O)C(O)C2O)C(O)C1O)C(O)C=CCCCCCCCCCCCCC)CCCCCCCCCCCCCCCCCCCCCCC	310	TRUE	TRUE	TRUE		FALSE	FALSE	null	null	100	98.4	86.4	88.7	100	1297.74	190628_TT1_Hclass_Aging_016_6_12M_SPF_M_Kidney_3_Pos	974.74896:54450 975.75231:46109 976.75567:19175	81.06807:24 82.06413:12 97.02178:24 97.09781:36 102.54373:10 121.09422:12 135.11394:48 147.1176:10 157.09636:10 211.19315:12 247.2372:100 252.26421:462 263.40973:24 264.26669:5901 265.26443:36 266.27783:24 277.20886:24 282.2757:657 293.21466:24 317.05914:10 368.36234:24 368.3812:142 409.30084:24 427.31091:12 444.32639:85 489.35931:12 531.41321:12 601.48737:24 601.52179:60 602.62354:304 603.50568:…	1.74346	48.9498	1.91366	19.3172	1.92523	1.96423	1.37892	1.04907	139.547	61.8693	123.496	1.67135	0.847586	108.691	2.04128	90.3067	36.1522	68.3631
6941	14.467	974.818	TG 60:9|TG 18:0_20:3_22:6	[M+NH4]+		0.464	TRUE	14.4	974.817	C63H104O6	TG	WKCBBARWEKXBEI-UHFFFAOYSA-N	O=C(OCC(OC(=O)CCCCCCCCCC=CCC=CCC=CCC)COC(=O)CCCCCCCCCCCCCCCCC)CCC=CCC=CCC=CCC=CCC=CCC=CCC	310	TRUE	TRUE	TRUE		FALSE	FALSE	null	null	100	100	35.2	69.6	100	106.9	190628_TT1_Hclass_Aging_047_1_9w_SPF_M_Kidney_1_Pos	974.81555:3834 975.8189:3028 976.82226:2045	93.05999:12 95.08094:24 107.08097:12 116.09711:12 116.1092:36 118.08613:24 147.10664:12 157.10963:10 185.12915:12 201.16515:24 209.13347:10 242.19835:10 251.17204:10 265.25388:12 269.18073:12 285.2785:10 293.2179:12 293.22269:48 311.2478:36 326.22983:10 341.29697:69 357.24771:10 367.27585:10 479.26837:10 564.52209:10 581.49048:10 617.50531:12 625.50891:12 627.51086:36 627.54602:24 629.51245:48 62…	0.670683	2.44319	0.549354	1.73377	1.13684	1.13435	1.09947	0.77867	2.13344	1.51039	1.43299	1.69188	0.574716	1.50937	1.46432	2.81977	3.25397	4.84607
6955	14.781	976.83	TG 60:8|TG 18:0_20:2_22:6	[M+NH4]+		0.268	TRUE	14.65	976.833	C63H106O6	TG	XLDJIGJUYLTKCW-UHFFFAOYSA-N	O=C(OCC(OC(=O)CCCCCCCCCC=CCC=CCCCCC)COC(=O)CCCCCCCCCCCCCCCCC)CCC=CCC=CCC=CCC=CCC=CCC=CCC	310	TRUE	TRUE	TRUE		FALSE	FALSE	null	null	100	99.8	25	68.2	100	67.69	190628_TT1_Hclass_Aging_003_27_9w_SPF_F_Kidney_3_Pos	976.83148:1690 977.83483:1582 978.83819:1070	105.06991:10 129.06363:10 142.0845:10 157.97864:10 183.11176:12 201.12421:12 217.20573:10 227.18198:12 261.03036:10 280.23032:10 293.22134:12 295.22144:10 337.26877:10 357.19586:10 371.28934:10 423.16064:10 575.27954:10 594.30463:10 599.51202:24 603.52124:24 606.5412:24 607.56458:24 625.51062:12 625.5387:12 627.50903:36 627.55823:12 629.53528:60 631.55774:79 651.51654:24 655.50891:12 655.552:48 6…	0.332759	1.29303	0.353141	0.868906	0.733087	0.655403	0.619747	0.320364	0.950789	0.577207	0.727773	1.09588	0.290253	0.637694	1.14442	1.47523	1.33117	2.24066
6979	12.904	986.747	Hex2Cer 43:2;2O|Hex2Cer 18:2;2O/25:0	[M+H]+		0.232	TRUE	12.44	986.75	C55H103NO13	Hex2Cer	YZEHYCFUHYWTHK-UHFFFAOYSA-N	O=C(NC(COC1OC(CO)C(OC2OC(CO)C(O)C(O)C2O)C(O)C1O)C(O)C=CCCC=CCCCCCCCCC)CCCCCCCCCCCCCCCCCCCCCCCC	310	TRUE	TRUE	TRUE		FALSE	FALSE	null	null	100	97.3	67.7	87.4	100	54.71	190628_TT1_Hclass_Aging_014_11_24M_SPF_M_Kidney_4_Pos	986.74664:1645 987.74999:2159 988.75335:1019	172.13194:10 209.18097:10 250.25764:12 262.24237:60 276.25842:24 517.28137:10 535.27808:24 577.49658:12 599.49182:10 626.62054:60 632.60596:10 644.62653:136 648.34406:10 670.58673:12 794.57782:12 802.68695:10 806.65936:36 806.68726:48 824.67651:24 841.68726:10 853.69397:24 869.67114:10 957.59259:10 968.72754:60 968.74933:68 977.6441:10	0.106209	0.887101	0.103113	0.48826	0.251818	0.164174	0.199001	0.163832	1.62961	1.07431	1.20585	0.249724	0.1303	2.0946	0.23301	1.36994	0.714114	0.808425
6989	13.122	988.764	Hex2Cer 43:1;2O|Hex2Cer 18:1;2O/25:0	[M+H]+		0.196	TRUE	12.8	988.766	C55H105NO13	Hex2Cer	WPIHMWBQRSAMDE-UHFFFAOYSA-N	O=C(NC(COC1OC(CO)C(OC2OC(CO)C(O)C(O)C2O)C(O)C1O)C(O)C=CCCCCCCCCCCCCC)CCCCCCCCCCCCCCCCCCCCCCCC	310	TRUE	TRUE	TRUE		FALSE	FALSE	null	null	100	98.8	46.6	76.7	100	61.56	190628_TT1_Hclass_Aging_032_23_24M_GF_M_Kidney_2_Pos	988.763:802 989.76635:1043 990.76971:722	141.12738:10 199.15073:10 264.23639:12 264.26376:36 285.23428:10 509.09613:10 590.77997:10 601.49976:36 603.54218:48 606.37909:10 616.66724:12 628.62762:36 646.60156:12 646.63007:96 646.67645:36 649.48773:10 771.62726:10 808.62518:12 808.68506:36 826.7489:10 940.48792:10 970.7594:48 988.71381:24	0.145424	0.953272	0.153154	0.554025	0.328728	0.287305	0.230701	0.173469	1.7033	1.32577	1.39413	0.336229	0.164457	1.94308	0.482763	1.10458	0.620618	0.826927
7006	13.847	992.774	TG 62:14|TG 20:4_20:4_22:6	[M+NH4]+	adduct linked to 6945_[M+H]+	0.75	TRUE	13.78	992.77	C65H98O6	TG	NJFNAWKYWBXFMY-UHFFFAOYSA-N	O=C(OCC(OC(=O)CCCCCCC=CCC=CCC=CCC=CCC)COC(=O)CCCCCCC=CCC=CCC=CCC=CCC)CCC=CCC=CCC=CCC=CCC=CCC=CCC	310	TRUE	TRUE	TRUE		FALSE	FALSE	null	null	100	100	60.6	85.8	100	137.99	190628_TT1_Hclass_Aging_023_35_24M_SPF_F_Kidney_3_Pos	992.77393:3045 993.77728:3868 994.78064:2187	81.06554:12 93.06992:24 105.06697:12 119.08145:24 119.41089:10 129.06364:12 131.08482:24 147.10912:24 157.09639:12 157.09814:24 171.10828:12 171.12112:12 185.12251:12 187.15366:24 195.11655:24 201.17021:12 203.17532:48 213.16147:12 255.16759:10 267.21063:12 285.23508:12 287.22919:24 289.24695:12 311.23969:48 343.25888:10 361.2764:36 379.27911:12 385.27356:48 647.49207:83 647.50281:130 671.45715:1…	0.67001	4.47611	0.539741	1.22091	0.816815	1.35084	1.11676	1.49893	2.86071	1.52314	2.32119	2.21739	1.19112	2.68403	1.62201	3.06564	3.35717	3.83865
7015	14.039	994.786	TG 62:13|TG 18:1_22:6_22:6	[M+NH4]+		0.768	TRUE	13.92	994.786	C65H100O6	TG	PTACBPKQWASVGS-UHFFFAOYSA-N	O=C(OCC(OC(=O)CCC=CCC=CCC=CCC=CCC=CCC=CCC)COC(=O)CCCCCCCC=CCCCCCCCC)CCC=CCC=CCC=CCC=CCC=CCC=CCC	310	TRUE	TRUE	TRUE		FALSE	FALSE	null	null	100	99.9	56	84.3	100	124.79	190628_TT1_Hclass_Aging_025_36_24M_SPF_F_Kidney_5_Pos	994.7851:2444 995.78845:2871 996.79181:1692	133.10072:12 145.09933:24 157.10349:10 159.11308:24 167.15038:10 173.13333:24 179.13319:10 183.12151:24 189.15739:12 201.16037:24 225.16295:12 227.18033:36 265.25323:24 283.23392:12 307.22531:10 311.2374:36 339.28534:36 385.27106:12 627.53967:24 647.48901:36 649.52222:272 651.50128:24 657.82367:10 665.52606:24 673.51361:24 689.51001:10 695.49188:86 695.51038:36 977.77051:36 994.69598:12 994.7934:…	0.41449	4.42518	0.396604	0.854099	0.511672	0.636127	1.01562	1.09364	2.28523	1.37383	1.83907	1.69188	0.773492	2.33107	0.880843	3.60966	2.62107	2.9528
7021	14.33	996.802	TG 62:12|TG 18:0_22:6_22:6	[M+NH4]+		0.304	TRUE	14.12	996.802	C65H102O6	TG	POVKTGOFOJWXMA-UHFFFAOYSA-N	O=C(OCC(OC(=O)CCC=CCC=CCC=CCC=CCC=CCC=CCC)COC(=O)CCCCCCCCCCCCCCCCC)CCC=CCC=CCC=CCC=CCC=CCC=CCC	310	TRUE	TRUE	TRUE		FALSE	FALSE	null	null	100	99.4	51.3	79.6	100	94.69	190628_TT1_Hclass_Aging_047_1_9w_SPF_M_Kidney_1_Pos	996.79834:1686 997.80169:2880 998.80505:2329	81.07898:10 97.15533:10 109.06762:10 116.09851:12 118.08755:24 123.11847:10 131.07922:24 157.06377:12 175.1449:24 183.11269:24 189.12523:12 213.15807:12 221.09732:10 225.15929:12 239.16795:12 269.22192:12 281.23291:10 293.22003:24 297.2294:10 311.23514:60 333.24142:10 352.91907:10 373.34818:10 493.30933:10 571.45721:10 590.2627:10 640.89203:10 651.53931:289 653.51782:12 681.25055:12 695.46063:24 …	0.26495	1.35245	0.288155	0.678433	0.301422	0.336599	0.347473	0.376979	0.927437	0.594505	0.643381	0.587459	0.371693	0.65435	0.461823	1.43457	0.770497	0.798994
7024	14.349	998.817	TG 62:11|TG 18:1_22:4_22:6	[M+NH4]+		0.179	TRUE	14.25	998.817	C65H104O6	TG	MUABJUBJGNSQFK-UHFFFAOYSA-N	O=C(OCC(OC(=O)CCCCCCCCC=CCC=CCC=CCC=CCC)COC(=O)CCCCCCCC=CCCCCCCCC)CCC=CCC=CCC=CCC=CCC=CCC=CCC	310	TRUE	TRUE	TRUE		FALSE	FALSE	null	null	100	99.9	31.7	65	100	61.17	190628_TT1_Hclass_Aging_014_11_24M_SPF_M_Kidney_4_Pos	998.81781:880 999.82116:984 1000.82452:455	85.10044:10 105.06404:10 118.08054:12 133.10056:10 157.06631:10 184.07181:10 201.15598:12 293.22137:12 311.23907:24 325.05615:10 365.09955:10 436.06485:10 551.39246:10 585.54297:10 604.50098:12 630.53241:10 645.49957:12 649.52356:36 651.50983:24 653.51703:36 653.54572:90 665.50568:10 679.55145:10 699.49915:12 799.24792:10 898.52893:10 927.68683:24 927.70392:48 927.75519:36 963.76825:10 981.79443:…	0.207245	0.865796	0.206243	0.546515	0.32747	0.456706	0.465891	0.332945	0.807337	0.550805	0.653408	0.775446	0.235058	0.697974	0.693861	1.30583	1.30021	2.51857
7053	8.435	1022.66	Hex3Cer 34:2;2O|Hex3Cer 18:2;2O/16:0	[M+H]+	ion correlated with 7080; adduct linked to 7080_[M+NH4]+	0.143	TRUE	8.3	1022.66	C52H95NO18	Hex3Cer	VXBQANSPCQUQPV-UHFFFAOYSA-N	O=C(NC(COC1OC(CO)C(OC2OC(CO)C(OC3OC(CO)C(O)C(O)C3O)C(O)C2O)C(O)C1O)C(O)C=CCCC=CCCCCCCCCC)CCCCCCCCCCCCCCC	310	TRUE	TRUE	TRUE		FALSE	FALSE	null	null	100	99.7	72.3	86.5	100	58.03	190628_TT1_Hclass_Aging_011_19_18M_GF_M_Kidney_2_Pos	1022.65753:723 1023.66088:562 1024.66424:446	259.2197:10 262.24442:36 280.25137:12 313.26727:10 482.24576:10 500.47171:24 513.19891:10 518.48596:132 531.4259:10 536.50671:24 612.60541:10 643.42426:12 649.51782:36 680.50433:12 795.62439:10 842.56494:24 908.60791:10 1004.61523:36 1004.64191:60 1022.63635:12	0.0359475	1.45782	0.0348766	0.370679	0.110403	0.0483727	0.093337	0.0413021	2.00085	0.477635	1.03913	0.0865056	0.0506021	0.693956	0.0948783	1.48106	0.275651	0.411329
7064	8.888	1024.68	Hex3Cer 34:1;2O|Hex3Cer 18:1;2O/16:0	[M+H]+	ion correlated with 7082; adduct linked to 7082_[M+NH4]+; found in higher mz's MsMs_7082	0.536	TRUE	8.67	1024.68	C52H97NO18	Hex3Cer	MGOOTGNGBOPVIV-UHFFFAOYSA-N	O=C(NC(COC1OC(CO)C(OC2OC(CO)C(OC3OC(CO)C(O)C(O)C3O)C(O)C2O)C(O)C1O)C(O)C=CCCCCCCCCCCCCC)CCCCCCCCCCCCCCC	310	TRUE	TRUE	TRUE		FALSE	FALSE	null	null	100	99.3	88.3	91.6	100	253.84	190628_TT1_Hclass_Aging_021_5_12M_SPF_M_Kidney_2_Pos	1024.68054:5602 1025.68389:6179 1026.68725:3049	184.07231:24 252.26907:24 263.41241:12 264.26941:400 267.13986:10 282.2738:60 490.49994:60 493.37247:10 502.49643:245 520.50836:1058 521.50763:36 538.50854:66 578.96643:10 682.56415:82 700.54504:12 844.60376:184 844.63635:111 862.57178:12 862.60883:36 928.68658:10 1006.66309:345 1007.64722:24 1010.60693:10 1024.64856:36	0.199345	8.53809	0.245652	1.47474	1.11023	0.194957	0.304666	0.359328	18.5096	4.27342	9.26882	0.388459	0.34536	7.17258	0.334864	11.2929	2.00532	3.98235
7155	12.091	1108.77	Hex3Cer 40:1;2O|Hex3Cer 18:1;2O/22:0	[M+H]+	ion correlated with 7215; ion correlated with 7183; ion correlated with 7166; adduct linked to 7166_[M+NH4]+; adduct linked to 7177_[M+Na]+	0.375	TRUE	10.91	1108.77	C58H109NO18	Hex3Cer	IPRFVQMZNCETMH-UHFFFAOYSA-N	O=C(NC(COC1OC(CO)C(OC2OC(CO)C(OC3OC(CO)C(O)C(O)C3O)C(O)C2O)C(O)C1O)C(O)C=CCCCCCCCCCCCCC)CCCCCCCCCCCCCCCCCCCCC	410	TRUE	TRUE	TRUE		FALSE	FALSE	null	null	100	83.1	80.4	91.8	100	143.3	190628_TT1_Hclass_Aging_020_7_18M_SPF_M_Kidney_1_Pos	1108.77271:2160 1109.77606:1690 1110.77942:800	252.25949:6 252.26617:12 264.26642:110 282.26599:12 282.28485:30 291.18518:5 554.27985:5 574.56732:12 586.56268:12 586.58649:97 602.61267:6 604.60522:331 605.58893:12 622.61646:35 766.59674:6 766.62396:24 766.65118:32 784.6546:12 928.70135:66 928.76123:18 946.71332:12 1011.71985:12 1074.20264:5 1090.67407:12 1090.76685:174 1090.79919:83 1091.72632:18 1091.80054:12 1108.75159:18	0.225489	3.01697	0.184998	0.635734	0.705835	0.249193	0.19724	0.280854	6.2737	2.08909	4.97001	0.221977	0.34789	3.92054	0.202314	4.15792	0.610946	1.60689
7156	12.012	1108.78	Hex3Cer 40:1;2O|Hex3Cer 18:1;2O/22:0	[M+H]+		0.036	TRUE	10.91	1108.77	C58H109NO18	Hex3Cer	IPRFVQMZNCETMH-UHFFFAOYSA-N	O=C(NC(COC1OC(CO)C(OC2OC(CO)C(OC3OC(CO)C(O)C(O)C3O)C(O)C2O)C(O)C1O)C(O)C=CCCCCCCCCCCCCC)CCCCCCCCCCCCCCCCCCCCC	410	TRUE	TRUE	TRUE		FALSE	FALSE	null	null	100	87.6	77.7	91.2	100	121.48	190628_TT1_Hclass_Aging_002_4_12M_SPF_M_Kidney_1_Pos	1108.77893:1451 1109.78228:1264 1110.78564:641	186.0724:12 252.27502:24 264.27087:116 282.27527:12 325.10672:10 367.15073:12 574.59326:12 586.59229:36 604.56622:12 604.60419:261 605.61206:24 622.59436:48 632.62323:60 633.62592:24 766.64185:24 777.5979:12 928.7121:69 946.72412:12 956.74524:24 1090.68542:12 1090.73645:141 1108.80029:24	0.241829	3.00043	0.177416	0.464345	0.604115	0.25359	0.184913	0.262957	5.00144	0.965685	4.4526	0.138735	0.308673	3.03558	0.185571	2.49442	0.620618	1.51722
7163	12.794	1122.78	Hex3Cer 41:1;2O|Hex3Cer 18:1;2O/23:0	[M+H]+	ion correlated with 7193; adduct linked to 7193_[M+NH4]+; found in higher mz's MsMs_7193	0.179	TRUE	11.3	1122.79	C59H111NO18	Hex3Cer	KNXYBODBPUDJGN-UHFFFAOYSA-N	O=C(NC(COC1OC(CO)C(OC2OC(CO)C(OC3OC(CO)C(O)C(O)C3O)C(O)C2O)C(O)C1O)C(O)C=CCCCCCCCCCCCCC)CCCCCCCCCCCCCCCCCCCCCC	410	TRUE	TRUE	TRUE		FALSE	FALSE	null	null	100	75.5	85.1	86.2	100	84.09	190628_TT1_Hclass_Aging_009_20_18M_GF_M_Kidney_3_Pos	1122.78198:1447 1123.78533:1870 1124.78869:835	250.24986:12 264.25607:12 264.2652:101 489.37885:10 592.48541:24 600.60083:60 618.612:294 620.27087:10 636.59192:12 636.62024:36 758.52344:10 780.66797:24 942.72144:48 960.68988:12 960.72034:24 1104.74841:110 1104.76697:162 1105.76526:24 1122.7865:24	0.073529	1.18073	0.0727859	0.300927	0.245616	0.0615653	0.103903	0.117023	2.01198	1.01479	1.443	0.117517	0.0936139	1.47195	0.114412	1.81774	0.319175	0.515228
7182	12.034	1134.77	Hex3Cer 42:2;2O|Hex3Cer 18:1;2O/24:1	[M+H]+	ion correlated with 7226; adduct linked to 7226_[M+Na]+	0.018	TRUE	11.14	1134.79	C60H111NO18	Hex3Cer	IYVZWSBTTXCIOR-UHFFFAOYSA-N	O=C(NC(COC1OC(CO)C(OC2OC(CO)C(OC3OC(CO)C(O)C(O)C3O)C(O)C2O)C(O)C1O)C(O)C=CCCCCCCCCCCCCC)CCCCCCCCCCCC=CCCCCCCCCCC	410	TRUE	TRUE	TRUE		FALSE	FALSE	null	null	100	90.5	48.9	91.8	100	42.82	190628_TT1_Hclass_Aging_009_20_18M_GF_M_Kidney_3_Pos	1134.77075:2391 1135.7741:2129 1136.77746:1070	247.23192:12 252.27448:12 262.25549:36 264.27036:287 282.26538:12 282.27951:36 574.60376:24 586.59613:69 600.60907:24 604.59784:320 612.57666:12 612.61139:140 630.56793:23 630.60669:817 631.60431:24 648.59088:12 648.61591:134 766.64685:24 776.56647:10 792.63367:36 792.67316:108 810.68219:24 928.72247:48 946.68713:12 954.66931:36 954.72137:177 972.68073:12 1090.76672:147 1116.77893:461 1117.77319:…	0.0653591	1.35857	0.0743023	0.211247	0.320045	0.0835529	0.0915759	0.12666	3.32456	0.825817	2.59136	0.114253	0.144216	1.74444	0.131155	1.46945	0.385267	1.11158
7183	12.091	1134.79	Hex3Cer 42:2;2O|Hex3Cer 18:1;2O/24:1	[M+H]+	ion correlated with 7215; ion correlated with 7155; adduct linked to 6988_[M-C6H10O4+H]+; found in higher mz's MsMs_7215; adduct linked to 7215_[M+NH4]+	0.268	TRUE	11.14	1134.79	C60H111NO18	Hex3Cer	IYVZWSBTTXCIOR-UHFFFAOYSA-N	O=C(NC(COC1OC(CO)C(OC2OC(CO)C(OC3OC(CO)C(O)C(O)C3O)C(O)C2O)C(O)C1O)C(O)C=CCCCCCCCCCCCCC)CCCCCCCCCCCC=CCCCCCCCCCC	410	TRUE	TRUE	TRUE		FALSE	FALSE	null	null	100	89.8	85.3	92.7	100	157.34	190628_TT1_Hclass_Aging_032_23_24M_GF_M_Kidney_2_Pos	1134.79297:3221 1135.79632:3169 1136.79968:1982	250.25935:6 252.26335:18 262.2464:12 264.26578:109 268.94879:5 282.27713:30 582.27032:5 600.6048:24 604.6142:24 605.59442:30 605.62207:12 612.56537:6 612.60358:79 630.61633:704 644.95001:5 648.62207:52 792.62433:6 792.66382:36 792.70337:33 804.03839:5 809.64624:12 810.66071:18 939.66107:5 954.70209:55 954.72375:76 972.71375:18 1071.49768:5 1091.7887:12 1116.78113:208 1117.78955:12 1134.7561:24 11…	0.109477	2.63029	0.115244	0.420501	0.550774	0.0996771	0.211329	0.196873	5.77731	1.93435	4.78892	0.197494	0.222649	3.31444	0.184175	3.38007	0.688322	1.89581
7186	12.986	1136.8	Hex3Cer 42:1;2O|Hex3Cer 18:1;2O/24:0	[M+H]+	ion correlated with 7221; ion correlated with 7223; adduct linked to 7221_[M+NH4]+; adduct linked to 7231_[M+Na]+; found in higher mz's MsMs_7221	0.857	TRUE	11.56	1136.8	C60H113NO18	Hex3Cer	MRVRZXMLIKCXOT-UHFFFAOYSA-N	O=C(NC(COC1OC(CO)C(OC2OC(CO)C(OC3OC(CO)C(O)C(O)C3O)C(O)C2O)C(O)C1O)C(O)C=CCCCCCCCCCCCCC)CCCCCCCCCCCCCCCCCCCCCCC	410	TRUE	TRUE	TRUE		FALSE	FALSE	null	null	100	77.6	88.2	91.5	100	665.17	190628_TT1_Hclass_Aging_011_19_18M_GF_M_Kidney_2_Pos	1136.80664:33890 1137.80999:57365 1138.81335:23554	145.10121:10 225.12511:10 252.26221:60 264.26462:569 277.2114:10 282.27826:60 325.24155:10 602.59589:12 602.60278:48 614.55878:12 614.61444:198 616.63721:48 616.65466:36 630.61121:24 632.63892:2104 632.98834:24 633.6416:96 650.64105:237 776.64941:10 794.6861:138 812.68976:60 956.69568:59 956.73907:233 957.72888:24 971.83685:10 974.71289:60 974.74792:60 1118.78247:939 1119.76355:48 1136.73547:12 1…	0.952609	32.3885	0.817325	4.2369	3.30961	0.89856	1.22042	1.1895	70.6403	21.8507	48.7084	1.20945	1.5421	34.2242	1.41062	44.7569	7.84719	19.6555
709	5.095	213.186	FA 13:0	[M-H]-		0.714	TRUE	4.7	213.186	C13H26O2	FA	SZHOJFHSIKHZHA-UHFFFAOYSA-N	O=C(O)CCCCCCCCCCCC	310	TRUE	TRUE	TRUE		FALSE	FALSE	null	null	100	98.5	22.7	75	100	11.66	190628_TT1_Hclass_Aging_QC_Neg_01	213.18564:2149 214.18899:400 215.19235:18	76.97117:5 78.9626:6 96.95593:6 116.95077:5 185.08139:5 213.1828:6	0.759708	0.564817	0.676789	0.442019	0.658556	0.771021	0.586349	0.813405	0.685891	0.496297	0.453016	0.687511	0.643531	0.529213	0.592173	0.461023	0.420803	0.433483
784	5.018	225.186	FA 14:1	[M-H]-		0.893	TRUE	4.66	225.186	C14H26O2	FA	YWWVWXASSLXJHU-UHFFFAOYSA-N	O=C(O)CCCCCCCC=CCCCC	310	TRUE	TRUE	TRUE		FALSE	FALSE	null	null	100	98.5	50	75	100	36.25	190628_TT1_Hclass_Aging_018_24_24M_GF_M_Kidney_3_Neg	225.18605:5474 226.1894:1177 227.19276:792	83.97119:2 198.02751:2 225.1825:5	0.900704	2.15305	0.810542	0.943624	0.489947	1.25438	2.86951	1.06768	1.7406	0.664233	1.31368	2.1124	1.29869	1.54307	0.674216	2.72232	1.53804	1.94818
785	4.909	225.187	FA 14:1	[M-H]-		0.571	TRUE	4.66	225.186	C14H26O2	FA	YWWVWXASSLXJHU-UHFFFAOYSA-N	O=C(O)CCCCCCCC=CCCCC	310	TRUE	TRUE	TRUE		FALSE	FALSE	null	null	100	99.2	48.5	75	100	23.67	190628_TT1_Hclass_Aging_021_5_12M_SPF_M_Kidney_2_Neg	225.18677:3303 226.19012:901 227.19348:764	76.98507:1 118.93997:2 150.00694:2 225.18668:5	0.677068	1.55946	0.599212	0.953374	0.52475	1.0656	1.54926	0.82981	0.934896	0.722942	1.04248	2.11074	0.876516	1.19979	0.661454	1.30702	1.40317	0.899352
794	5.54	227.203	FA 14:0	[M-H]-	adduct linked to 2253_[2M-H]-; similar chromatogram in higher mz_1658; found in higher mz's MsMs_2253; found in higher mz's MsMs_1331; found in higher mz's MsMs_1079; adduct linked to 1079_[M+Hac-H]-; similar chromatogram in higher mz_1331; adduct linked to 1010_[M+FA-H]-; similar chromatogram in higher mz_2255; found in higher mz's MsMs_1010; found in higher mz's MsMs_1658	1	TRUE	5.3	227.202	C14H28O2	FA	TUNFSRHWOTWDNC-UHFFFAOYSA-N	O=C(O)CCCCCCCCCCCCC	310	TRUE	TRUE	TRUE		FALSE	FALSE	null	null	100	99.4	75	75	100	482.13	190628_TT1_Hclass_Aging_QC_Neg_02	227.20161:73893 228.20496:23619 229.20832:2473	227.20506:36	20.8909	18.38	16.1837	14.4563	12.3095	24.5005	15.7381	29.609	26.2542	14.3817	20.1241	20.7525	17.0236	20.5621	14.4721	15.5727	15.8075	13.9273
888	5.941	241.217	FA 15:0	[M-H]-	found in higher mz's MsMs_2932; adduct linked to 974_[M-H]-; similar chromatogram in higher mz_1355; similar chromatogram in higher mz_2932; similar chromatogram in higher mz_5716; found in higher mz's MsMs_1612	1	TRUE	5.96	241.217	C15H30O2	FA	WQEPLUUGTLDZJY-UHFFFAOYSA-N	O=C(O)CCCCCCCCCCCCCC	310	TRUE	TRUE	TRUE		FALSE	FALSE	null	null	100	100	64	75	100	132.33	190628_TT1_Hclass_Aging_028_9_18M_SPF_M_Kidney_4_Neg	241.21747:12012 242.22082:4121 243.22418:353	149.01266:10 241.21266:36	4.44806	3.96331	3.4363	2.92404	3.44382	4.17147	3.01146	5.21604	4.35359	3.8178	3.0101	3.92958	3.19884	6.03921	2.72786	3.18551	2.62846	2.43505
942	5.827	253.217	FA 16:1	[M-H]-	found in higher mz's MsMs_1438	0.071	TRUE	5.71	253.217	C16H30O2	FA	SECPZKHBENQXJG-UHFFFAOYSA-N	O=C(O)CCCCCCCC=CCCCCCC	310	TRUE	TRUE	TRUE		FALSE	FALSE	null	null	100	99.9	75	75	100	234.7	190628_TT1_Hclass_Aging_046_22_24M_GF_M_Kidney_1_Neg	253.21735:41659 254.2207:12007 255.22406:2519	253.21609:190	2.41758	3.239	2.3315	2.52644	2.10981	2.54506	4.69079	5.4464	5.15061	3.32526	4.42578	3.68423	3.47835	4.80416	17.5865	29.7525	8.46862	8.01587
944	5.743	253.218	FA 16:1	[M-H]-	adduct linked to 1266_[M+FA-H]-; found in higher mz's MsMs_1438; similar chromatogram in higher mz_2616; found in higher mz's MsMs_2616; similar chromatogram in higher mz_3357; found in higher mz's MsMs_2238; found in higher mz's MsMs_1266; similar chromatogram in higher mz_2151	0.929	TRUE	5.71	253.217	C16H30O2	FA	SECPZKHBENQXJG-UHFFFAOYSA-N	O=C(O)CCCCCCCC=CCCCCCC	310	TRUE	TRUE	TRUE		FALSE	FALSE	null	null	100	100	75	75	100	1319.11	190628_TT1_Hclass_Aging_007_28_12M_SPF_F_Kidney_1_Neg	253.21722:73124 254.22057:21436 255.22393:3572	253.21878:148	12.9767	29.7037	8.52196	17.0491	14.3223	16.7789	25.5672	20.629	32.7783	18.7139	25.9812	23.3288	15.2956	33.54	17.6525	29.6112	34.1064	27.656
955	6.309	255.232	FA 16:0	[M-H]-	found in higher mz's MsMs_2673; found in higher mz's MsMs_1463; adduct linked to 1477_[M+C2H3N+Na-2H]-; found in higher mz's MsMs_2246; found in higher mz's MsMs_2654; found in higher mz's MsMs_4246; found in higher mz's MsMs_2154; similar chromatogram in higher mz_7374	1	TRUE	6.14	255.233	C16H32O2	FA	IPCSVZSSVZVIGE-UHFFFAOYSA-N	O=C(O)CCCCCCCCCCCCCCC	310	TRUE	TRUE	TRUE		FALSE	FALSE	null	null	100	99.8	75	75	100	4324.73	190628_TT1_Hclass_Aging_005_33_18M_SPF_F_Kidney_3_Neg	255.23305:523594 256.2364:184667 257.23976:30227	255.22934:12	298.974	296.636	276.686	325.946	176.919	328.079	249.619	423.236	398.122	287.68	356.044	264.577	300.226	373.869	255.032	290.019	303.961	277.821
966	6.299	258.252	FA 16:0(d3)	[M-H]-	adduct linked to 1356_[M+FA-H]-; adduct linked to 1545_[M+CH3COONa-H]-; found in higher mz's MsMs_5254; found in higher mz's MsMs_2686; found in higher mz's MsMs_2168; found in higher mz's MsMs_1709; found in higher mz's MsMs_1477; found in higher mz's MsMs_1356; found in higher mz's MsMs_2907; found in higher mz's MsMs_2673; found in higher mz's MsMs_4879; found in higher mz's MsMs_1919	0.946	TRUE	6.3	258.252	C16H29O2	FA	IPCSVZSSVZVIGE-FIBGUPNXSA-N	[2H]C([2H])([2H])CCCCCCCCCCCCCCC(O)=O	annotated by user-defined text library	TRUE	TRUE	FALSE		TRUE	FALSE	null	null	100	100	null	null	null	56997.4	190628_TT1_Hclass_Aging_038_47_24M_GF_F_Kidney_3_Neg	258.25174:1687340 259.25509:484738 260.25845:54095	80.02456:24 81.03588:12 227.8781:10 238.22363:48 240.23807:359 241.24628:106 257.41711:36 258.25092:10956	621.291	577.403	625.888	604.563	625.272	577.702	594.101	631.101	590.695	627.239	601.267	596.778	595.297	568.811	647.138	613.442	611.435	562.492
994	6.144	267.231	FA 17:1	[M-H]-		0.661	TRUE	5.96	267.233	C17H32O2	FA	QSBYPNXLFMSGKH-UHFFFAOYSA-N	O=C(O)CCCCCCCC=CCCCCCCC	310	TRUE	TRUE	TRUE		FALSE	FALSE	null	null	100	99.7	75	75	100	178.53	190628_TT1_Hclass_Aging_010_8_18M_SPF_M_Kidney_3_Neg	267.23245:6701 268.2358:1808 269.23916:375	267.23273:36	1.83185	1.99213	1.8198	1.75146	1.62189	1.77058	1.76604	2.45047	1.95522	2.28727	1.91065	1.76336	1.93162	4.63252	1.64197	1.98135	1.71519	1.6777
998	3.731	269.213	FA 16:1;O	[M-H]-		0.107	TRUE	5.08	269.212	C16H30O3	OxFA	DBPLZAFLPDHBAS-UHFFFAOYSA-N	O=C(O)CCCCCCC(O)C=CCCCCCC	410	TRUE	TRUE	TRUE		FALSE	FALSE	null	null	100	79.2	23.3	75	100	21.81	190628_TT1_Hclass_Aging_015_31_18M_SPF_F_Kidney_1_Neg	269.21216:1584 270.21551:412 271.21887:54	127.10506:3 155.10136:4 171.10056:8 211.06863:3 251.19048:4 261.02298:3 269.20816:8	0.106562	0.169445	0.0936269	0.0624749	1.04274	0.292504	0.179716	0.151403	0.126065	0.106837	0.100632	0.181289	0.089978	0.0641974	0.577587	0.141965	0.0812205	0.0615702
1001	6.652	269.249	FA 17:0	[M-H]-		1	TRUE	6.45	269.249	C17H34O2	FA	KEMQGTRYUADPNZ-UHFFFAOYSA-N	O=C(O)CCCCCCCCCCCCCCCC	310	TRUE	TRUE	TRUE		FALSE	FALSE	null	null	100	99.6	75	75	100	359.94	190628_TT1_Hclass_Aging_009_20_18M_GF_M_Kidney_3_Neg	269.24875:24524 270.2521:10277 271.25546:1022	269.24777:192	8.29445	7.47228	7.24558	6.76462	7.14275	7.6338	6.89493	12.2219	8.51686	9.22144	7.87013	7.36317	7.89651	12.2883	6.9398	7.3148	6.88794	6.66453
1018	5.574	277.217	FA 18:3	[M-H]-	adduct linked to 1536_[M+Hac-H]-; found in higher mz's MsMs_3133	0.929	TRUE	5.58	277.217	C18H30O2	FA	DTOSIQBPPRVQHS-UHFFFAOYSA-N	O=C(O)CCCCCCCC=CCC=CCC=CCC	310	TRUE	TRUE	TRUE		FALSE	FALSE	null	null	100	100	69.5	75	100	175.79	190628_TT1_Hclass_Aging_035_16_12M_GF_M_Kidney_1_Neg	277.21768:13924 278.22103:5032 279.22439:653	172.88644:10 277.21915:79	3.03231	4.00843	2.2394	3.95795	1.75739	4.11995	3.23698	2.37255	4.86444	3.01397	3.89976	3.0129	3.44551	7.29023	2.45474	4.19375	4.1382	5.04377
1025	5.723	279.232	FA 18:2	[M-H]-	found in higher mz's MsMs_2432; found in higher mz's MsMs_3793; found in higher mz's MsMs_2568	0.5	TRUE	6.04	279.233	C18H32O2	FA	OYHQOLUKZRVURQ-UHFFFAOYSA-N	O=C(O)CCCCCCCC=CCC=CCCCCC	310	TRUE	TRUE	TRUE		FALSE	FALSE	null	null	100	98.8	25.7	75	100	35.56	190628_TT1_Hclass_Aging_018_24_24M_GF_M_Kidney_3_Neg	279.23248:1173 280.23583:434 281.23919:68	149.13419:10 192.99123:12 219.17366:12 279.22601:12	0.383841	0.411002	0.332089	0.341265	0.226727	0.363728	0.41957	0.338349	0.319156	0.319487	0.322024	0.379089	0.320568	0.409134	0.253059	0.389316	0.388829	0.417467
1026	5.995	279.234	FA 18:2	[M-H]-	adduct linked to 1491_[M+FA-H]-; found in higher mz's MsMs_1638; found in higher mz's MsMs_1542; found in higher mz's MsMs_1491; found in higher mz's MsMs_2393; adduct linked to 3009_[2M-H]-; found in higher mz's MsMs_3009; found in higher mz's MsMs_4739; found in higher mz's MsMs_1842; similar chromatogram in higher mz_2898; found in higher mz's MsMs_2898; found in higher mz's MsMs_4050	1	TRUE	6.04	279.233	C18H32O2	FA	OYHQOLUKZRVURQ-UHFFFAOYSA-N	O=C(O)CCCCCCCC=CCC=CCCCCC	310	TRUE	TRUE	TRUE		FALSE	FALSE	null	null	100	100	75	75	100	4654.71	190628_TT1_Hclass_Aging_040_25_9w_SPF_F_Kidney_1_Neg	279.23303:113633 280.23638:40837 281.23974:4884	279.23209:650	46.485	68.1677	38.9125	82.5347	37.019	68.4224	54.6217	59.6257	84.1819	58.4907	67.511	56.3802	65.7401	123.011	48.1713	73.4334	72.2117	97.961
1038	6.164	281.246	FA 18:1	[M-H]-	found in higher mz's MsMs_2442; found in higher mz's MsMs_2071; found in higher mz's MsMs_2346	0.393	TRUE	6.41	281.249	C18H34O2	FA	ZQPPMHVWECSIRJ-UHFFFAOYSA-N	O=C(O)CCCCCCCC=CCCCCCCCC	310	TRUE	TRUE	TRUE		FALSE	FALSE	null	null	100	99.2	75	75	100	45.6	190628_TT1_Hclass_Aging_003_27_9w_SPF_F_Kidney_3_Neg	281.24841:1811 282.25176:736 283.25512:530	281.24738:10	0.791242	0.895892	0.692075	0.602359	0.429802	0.729531	1.15277	0.892353	0.776186	0.732499	0.83883	1.1049	0.697928	0.945331	0.63994	0.793481	0.813675	0.932806
1041	6.456	281.249	FA 18:1	[M-H]-	adduct linked to 1506_[M+FA-H]-; adduct linked to 1572_[M+Hac-H]-; adduct linked to 3034_[2M-H]-; found in higher mz's MsMs_3034; found in higher mz's MsMs_2047; found in higher mz's MsMs_1855; found in higher mz's MsMs_1572; found in higher mz's MsMs_1506; found in higher mz's MsMs_3203; found in higher mz's MsMs_3548; similar chromatogram in higher mz_1070; found in higher mz's MsMs_3661; found…	1	TRUE	6.41	281.249	C18H34O2	FA	ZQPPMHVWECSIRJ-UHFFFAOYSA-N	O=C(O)CCCCCCCC=CCCCCCCCC	310	TRUE	TRUE	TRUE		FALSE	FALSE	null	null	100	100	75	75	100	9120.12	190628_TT1_Hclass_Aging_004_14_9w_GF_M_Kidney_2_Neg	281.24866:434077 282.25201:158728 283.25537:19062	93.03646:10 163.95549:10 236.26797:10 263.24197:24 280.32669:24 281.24857:3691	135.081	166.69	104.138	156.757	105.224	162.115	165.648	216.109	226.971	155.866	201.333	176.909	161.373	247.884	177.407	179.94	193.921	226.512
1056	7.435	283.263	FA 18:0	[M-H]-	similar chromatogram in higher mz_1953; found in higher mz's MsMs_6400; found in higher mz's MsMs_4437; found in higher mz's MsMs_1660; similar chromatogram in higher mz_1967; found in higher mz's MsMs_2050	0.946	TRUE	6.93	283.264	C18H36O2	FA	QIQXTHQIDYTFRH-UHFFFAOYSA-N	O=C(O)CCCCCCCCCCCCCCCCC	410	TRUE	TRUE	TRUE		FALSE	FALSE	null	null	100	97.1	75	75	100	154.36	190628_TT1_Hclass_Aging_QC_Neg_01	283.26434:29733 284.26769:11210 285.27105:1093	283.24728:12 283.26852:171	11.3018	7.63782	9.76089	7.54971	7.55701	7.79284	8.01553	14.7722	9.14093	8.43944	9.83025	5.13024	13.5737	7.62585	8.15586	10.1896	6.76556	6.85707
1060	6.972	283.266	FA 18:0	[M-H]-	similar chromatogram in higher mz_1586; found in higher mz's MsMs_1586; found in higher mz's MsMs_1516; found in higher mz's MsMs_3095; found in higher mz's MsMs_3258; found in higher mz's MsMs_3415; found in higher mz's MsMs_5777; found in higher mz's MsMs_6178; adduct linked to 3069_[2M-H]-; similar chromatogram in higher mz_1062; similar chromatogram in higher mz_1075; similar chromatogram in …	1	TRUE	6.93	283.264	C18H36O2	FA	QIQXTHQIDYTFRH-UHFFFAOYSA-N	O=C(O)CCCCCCCCCCCCCCCCC	310	TRUE	TRUE	TRUE		FALSE	FALSE	null	null	100	99.9	72.1	75	100	3099.13	190628_TT1_Hclass_Aging_QC_Neg_05	283.26431:52697 284.26766:17527 285.27102:1998	265.25116:18 283.26376:412	157.521	139.882	184.722	155.401	116.834	206.024	147.761	305.085	170.842	136.478	160.219	162.599	188.416	154.464	166.597	126.083	145.814	128.743
1074	6.956	286.282	FA 18:0(d3)	[M-H]-	adduct linked to 1614_[M+C2H3N+Na-2H]-; adduct linked to 1718_[M+C2H3N+Na-2H]-; found in higher mz's MsMs_3313; found in higher mz's MsMs_3120; found in higher mz's MsMs_3095; found in higher mz's MsMs_2331; found in higher mz's MsMs_1908; found in higher mz's MsMs_1605; found in higher mz's MsMs_1524; found in higher mz's MsMs_1718; found in higher mz's MsMs_3495; found in higher mz's MsMs_3728;…	0.946	TRUE	6.96	286.283	C18H33O2	FA	QIQXTHQIDYTFRH-FIBGUPNXSA-N	[2H]C([2H])([2H])CCCCCCCCCCCCCCCCC(O)=O	annotated by user-defined text library	TRUE	TRUE	FALSE		TRUE	FALSE	null	null	100	100	null	null	null	64206.4	190628_TT1_Hclass_Aging_024_10_24M_SPF_M_Kidney_3_Neg	286.2829:1658677 287.28625:530094 288.28961:124526	71.01742:12 240.26788:24 243.39101:24 245.15237:24 266.25708:60 267.26566:24 268.27155:750 269.27011:60 285.33826:36 285.35721:71 285.38806:24 286.15674:24 286.28494:26681	640	640	640	640	640	640	640	640	640	640	640	640	640	640	640	640	640	640
1217	4.653	295.225	FA 18:2;O	[M-H]-		0.643	TRUE	5.52	295.228	C18H32O3	OxFA	UKRXAPMQXXXXTD-UHFFFAOYSA-N	O=C(O)CCCCCCC(O)C=CCC=CCCCCC	410	TRUE	TRUE	TRUE		FALSE	FALSE	null	null	100	91	48.3	75	100	23.47	190628_TT1_Hclass_Aging_029_42_12M_GF_F_Kidney_3_Neg	295.22534:6338 296.22869:1916 297.23205:941	97.06455:2 135.21033:1 139.11066:4 151.1133:2 155.14236:20 156.15089:5 181.15836:4 251.23854:4 277.21497:2 295.22714:45	0.573406	0.400345	0.319478	0.25965	0.728162	0.522427	0.544042	0.954213	0.404589	0.278527	0.281088	0.720533	0.579554	0.204234	0.995463	0.370847	0.258362	0.186134
1218	4.263	295.227	FA 18:2;O	[M-H]-		0.589	TRUE	5.52	295.228	C18H32O3	OxFA	UKRXAPMQXXXXTD-UHFFFAOYSA-N	O=C(O)CCCCCCC(O)C=CCC=CCCCCC	410	TRUE	TRUE	TRUE		FALSE	FALSE	null	null	100	82.7	35.3	75	100	26.28	190628_TT1_Hclass_Aging_QC_Neg_04	295.22623:2206 296.22958:342 297.23294:328	169.12563:3 195.13499:4 233.1516:3 277.21381:4 278.21951:8 295.2283:16	0.389278	0.56162	0.223176	0.314541	0.677478	0.617163	0.339152	0.4566	0.553575	0.205823	0.279724	0.416073	0.251117	0.187935	0.566283	0.394387	0.319002	0.205708
1219	6.777	295.264	FA 19:1	[M-H]-		0.946	TRUE	6.87	295.264	C19H36O2	FA	YOKHLRHWEXTWJR-UHFFFAOYSA-N	O=C(O)CCCCCCCC=CCCCCCCCCC	310	TRUE	TRUE	TRUE		FALSE	FALSE	null	null	100	99.8	82.1	75	100	21.9	190628_TT1_Hclass_Aging_QC_Neg_02	295.26419:2342 296.26754:573 297.2709:107	295.21729:12 295.27036:36	0.418637	0.481693	0.412341	0.476326	0.341949	0.471256	0.393696	0.726938	0.470226	0.667305	0.498386	0.483437	0.414309	1.35879	0.376307	0.482752	0.41235	0.498968
1241	5.084	297.241	FA 18:1;1O (KetoB)	[M-H]-	found in higher mz's MsMs_3697	0.696	TRUE	6.07	297.243	C18H34O3	OxFA	JEXIZLHRWZNJIX-UHFFFAOYSA-N	O=C(O)CCCCCCC(O)C=CCCCCCCCC	410	TRUE	TRUE	TRUE		FALSE	FALSE	null	null	100	88.7	35.1	75	100	33.68	190628_TT1_Hclass_Aging_031_48_24M_GF_F_Kidney_6_Neg	297.24152:1308 298.24487:392 299.24823:143	120.97234:2 149.01027:5 183.01189:5 184.01953:5 254.2589:2 279.23917:5 297.24332:14	0.765145	0.497323	0.554119	0.436602	0.487244	0.689078	0.473414	0.998301	0.787299	0.481961	0.475531	0.656471	0.634636	0.406805	0.469289	0.454504	0.340685	0.349135
1243	4.718	297.242	FA 18:1;O	[M-H]-		0.839	TRUE	6.07	297.243	C18H34O3	OxFA	JEXIZLHRWZNJIX-UHFFFAOYSA-N	O=C(O)CCCCCCC(O)C=CCCCCCCCC	410	TRUE	TRUE	TRUE		FALSE	FALSE	null	null	100	78.8	16.3	75	100	48.63	190628_TT1_Hclass_Aging_006_39_9w_GF_F_Kidney_3_Neg	297.24271:4430 298.24606:1721 299.24942:214	78.9633:5 119.04764:12 135.07802:2 149.01051:10 155.10722:14 170.0052:5 171.10126:7 181.06561:2 183.01219:117 184.01794:52 197.02815:5 238.09644:2 264.98669:12 279.23495:25 280.23492:10 297.24142:50	0.764058	1.08061	0.414251	0.453936	3.23297	1.53167	0.815364	1.15961	0.84599	0.668329	0.594243	1.08212	0.549448	0.318326	3.43927	0.736623	0.421906	0.294683
1244	4.472	297.244	FA 18:1;1O (HYA or HYC)	[M-H]-		0.964	TRUE	6.07	297.243	C18H34O3	OxFA	JEXIZLHRWZNJIX-UHFFFAOYSA-N	O=C(O)CCCCCCC(O)C=CCCCCCCCC	410	TRUE	TRUE	TRUE		FALSE	FALSE	null	null	100	73.3	39.6	75	100	49.14	190628_TT1_Hclass_Aging_039_41_12M_GF_F_Kidney_2_Neg	297.24432:2679 298.24767:910 299.25103:107	139.98158:2 183.13445:7 250.02362:2 279.23563:5 297.24692:13	0.729625	0.731776	0.591187	0.58358	1.99121	1.00682	0.834594	1.05059	0.82168	0.644094	0.642	0.964563	0.701007	0.511916	1.69192	0.610955	0.638739	0.465157
1247	7.264	297.279	FA 19:0	[M-H]-	similar chromatogram in higher mz_3406	0.946	TRUE	7.13	297.28	C19H38O2	FA	ISYWECDDZWTKFF-UHFFFAOYSA-N	O=C(O)CCCCCCCCCCCCCCCCCC	310	TRUE	TRUE	TRUE		FALSE	FALSE	null	null	100	99.9	66.4	75	100	63.93	190628_TT1_Hclass_Aging_008_43_18M_GF_F_Kidney_1_Neg	297.2775:3831 298.28085:1661 299.28421:830	137.94289:10 297.27588:12 297.27829:24	0.935862	0.932836	0.888883	1.12671	0.974149	0.923151	0.748582	1.30931	0.944967	1.10387	0.884883	0.860544	0.973679	1.20645	0.825176	0.910095	0.738702	0.824257
1331	5.525	301.216	FA 20:5	[M-H]-	found in higher mz's MsMs_3379; similar chromatogram in higher mz_2388	0.929	TRUE	5.69	301.217	C20H30O2	FA	JAZBEHYOTPTENJ-UHFFFAOYSA-N	O=C(O)CCCC=CCC=CCC=CCC=CCC=CCC	310	TRUE	TRUE	TRUE		FALSE	FALSE	null	null	100	99.7	46.2	75	100	282.18	190628_TT1_Hclass_Aging_020_7_18M_SPF_M_Kidney_1_Neg	301.21695:8451 302.2203:3956 303.22366:494	225.03122:10 301.20767:12	2.94061	3.65781	2.26233	3.39062	1.39044	3.18504	3.32019	3.55608	4.30358	3.66045	4.40292	3.21268	3.69184	5.33836	2.80699	3.55998	3.25176	3.71343
1332	6.188	301.216	FA 20:5	[M-H]-	found in higher mz's MsMs_1685; found in higher mz's MsMs_1608	0.018	TRUE	5.69	301.217	C20H30O2	FA	JAZBEHYOTPTENJ-UHFFFAOYSA-N	O=C(O)CCCC=CCC=CCC=CCC=CCC=CCC	310	TRUE	TRUE	TRUE		FALSE	FALSE	null	null	100	96.9	47.9	75	100	101.71	190628_TT1_Hclass_Aging_Blank_Neg	301.21613:2418 302.21948:1127 303.22284:150	214.94046:10 225.02931:24 265.979:10 301.2132:60	0.926438	0.563041	1.02837	0.981181	0.6964	1.01235	0.610823	1.14013	1.04603	0.642388	1.27922	0.45735	1.08384	0.832903	0.602018	0.536713	0.518562	0.695067
1334	6.314	301.241	FA 17:0;2O	[M-H]-		0.982	TRUE	5.71	301.238	C17H34O4	OxFA	IOJIYUIMUZFIMU-UHFFFAOYSA-N	O=C(O)CCCCCCCC(O)CCCCCCCCO	410	TRUE	TRUE	TRUE		FALSE	FALSE	null	null	100	95.3	48.8	75	100	131.36	190628_TT1_Hclass_Aging_039_41_12M_GF_F_Kidney_2_Neg	301.23831:5158 302.24166:1939 303.24502:311	242.17892:10 283.20563:12 301.20364:12 301.22556:24	1.83294	1.88841	2.00744	1.79047	1.22757	1.97043	1.76849	2.34144	2.45532	1.70598	1.69131	1.47111	2.0955	1.84476	1.74953	1.667	1.80082	1.68482
1351	6.66	303.231	FA 20:4	[M-H]-	found in higher mz's MsMs_2177; found in higher mz's MsMs_1697	0.946	TRUE	5.96	303.233	C20H32O2	FA	HQPCSDADVLFHHO-UHFFFAOYSA-N	O=C(O)CCCCCCC=CCC=CCC=CCC=CCC	410	TRUE	TRUE	TRUE		FALSE	FALSE	null	null	100	94.8	74.2	75	100	757.95	190628_TT1_Hclass_Aging_QC_Neg_01	303.23276:29166 304.23611:8138 305.23947:1263	157.12144:10 303.23822:494	8.31257	4.42937	8.74896	7.92926	5.84591	8.26652	5.2677	10.7639	9.47294	5.6354	11.8275	3.92528	9.93522	6.56676	5.00065	4.47804	4.42192	6.36842
1353	5.943	303.233	FA 20:4	[M-H]-	adduct linked to 1612_[M+FA-H]-; adduct linked to 1708_[M+C2H3N+Na-2H]-; adduct linked to 1812_[M+CH3COONa-H]-; found in higher mz's MsMs_3423; found in higher mz's MsMs_2434; found in higher mz's MsMs_2011; found in higher mz's MsMs_1612; found in higher mz's MsMs_2566; found in higher mz's MsMs_2932; similar chromatogram in higher mz_3423; found in higher mz's MsMs_5716; similar chromatogram in…	0.929	TRUE	5.96	303.233	C20H32O2	FA	HQPCSDADVLFHHO-UHFFFAOYSA-N	O=C(O)CCCCCCC=CCC=CCC=CCC=CCC	310	TRUE	TRUE	TRUE		FALSE	FALSE	null	null	100	100	44.6	75	100	16581.3	190628_TT1_Hclass_Aging_048_40_12M_GF_F_Kidney_1_Neg	303.23346:494377 304.23681:233147 305.24017:28786	71.01397:60 81.0292:12 81.03426:48 83.04524:12 83.04652:60 95.04772:12 127.07038:36 129.95322:10 135.08089:36 137.18999:10 145.07043:24 159.07861:60 161.14037:12 163.14548:24 167.10941:24 177.16391:48 189.1608:12 191.10568:24 203.17982:12 231.20987:96 232.20753:24 240.99117:24 257.18964:12 259.2464:110 285.20847:12 285.22034:36 301.20978:12 303.22751:283 303.23483:448	102.963	124.569	117.868	140.412	73.0034	148.243	174.98	161.039	180.301	169.934	178.441	176.685	145.816	178.523	190.897	138.389	167.88	203.822
1357	6.257	305.247	FA 20:3	[M-H]-	similar chromatogram in higher mz_2246; similar chromatogram in higher mz_3372; similar chromatogram in higher mz_2730; similar chromatogram in higher mz_8065; similar chromatogram in higher mz_2947	0.929	TRUE	6.41	305.249	C20H34O2	FA	AHANXAKGNAKFSK-UHFFFAOYSA-N	O=C(O)CCCCCCCCCC=CCC=CCC=CCC	310	TRUE	TRUE	TRUE		FALSE	FALSE	null	null	100	99.9	65.4	75	100	1079.17	190628_TT1_Hclass_Aging_047_1_9w_SPF_M_Kidney_1_Neg	305.24911:42619 306.25246:20755 307.25582:2563	259.25644:24 303.23581:10 305.25049:206	8.22848	7.30248	7.03157	12.5351	4.73863	10.1152	12.1084	8.33638	11.7411	11.6623	10.2604	10.026	7.88214	14.0492	8.83847	9.92956	9.31243	11.1118
1363	6.631	307.261	FA 20:2	[M-H]-	similar chromatogram in higher mz_2296; found in higher mz's MsMs_3698; similar chromatogram in higher mz_3555	0.929	TRUE	6.9	307.264	C20H36O2	FA	XSXIVVZCUAHUJO-UHFFFAOYSA-N	O=C(O)CCCCCCCCCC=CCC=CCCCCC	310	TRUE	TRUE	TRUE		FALSE	FALSE	null	null	100	99.3	75	75	100	352.24	190628_TT1_Hclass_Aging_047_1_9w_SPF_M_Kidney_1_Neg	307.26459:8745 308.26794:5028 309.2713:547	307.23889:12 307.26102:181	3.04391	2.57116	2.35405	2.79584	2.12063	3.02116	3.39642	2.75054	3.96289	3.20272	3.239	2.8293	3.37127	4.20277	2.91419	3.03884	2.68248	3.52943
1399	7.048	309.28	FA 20:1	[M-H]-	similar chromatogram in higher mz_2944; adduct linked to 1642_[M+FA-H]-; adduct linked to 1721_[M+Hac-H]-; similar chromatogram in higher mz_3410	0.946	TRUE	7.13	309.28	C20H38O2	FA	BITHHVVYSMSWAG-UHFFFAOYSA-N	O=C(O)CCCCCCCCCC=CCCCCCCCC	310	TRUE	TRUE	TRUE		FALSE	FALSE	null	null	100	100	75	75	100	328.05	190628_TT1_Hclass_Aging_046_22_24M_GF_M_Kidney_1_Neg	309.27988:13350 310.28323:5419 311.28659:856	309.2757:307	3.85799	4.84499	3.41566	4.57042	2.89474	5.14406	5.42189	5.81072	6.23032	4.80835	5.83122	5.00509	4.64191	6.4051	5.1115	4.86881	4.81406	5.79329
1400	6.746	309.282	FA 20:1	[M-H]-	found in higher mz's MsMs_2662	0.571	TRUE	7.13	309.28	C20H38O2	FA	BITHHVVYSMSWAG-UHFFFAOYSA-N	O=C(O)CCCCCCCCCC=CCCCCCCCC	310	TRUE	TRUE	TRUE		FALSE	FALSE	null	null	100	98.3	66.6	75	100	23.18	190628_TT1_Hclass_Aging_029_42_12M_GF_F_Kidney_3_Neg	309.27817:765 310.28152:369 311.28488:70	235.03091:10 309.26981:12 309.27969:48	0.221823	0.143513	0.22203	0.162868	0.0733231	0.191199	0.230414	0.268287	0.232335	0.173738	0.242541	0.232472	0.252486	0.191927	0.117049	0.174196	0.166484	0.195743
1411	7.545	311.296	FA 20:0	[M-H]-	adduct linked to 1750_[M+Hac-H]-; found in higher mz's MsMs_1750; similar chromatogram in higher mz_4264; similar chromatogram in higher mz_7459	1	TRUE	7.58	311.296	C20H40O2	FA	VKOBVWXKNCXXDE-UHFFFAOYSA-N	O=C(O)CCCCCCCCCCCCCCCCCCC	310	TRUE	TRUE	TRUE		FALSE	FALSE	null	null	100	100	75	75	100	380.35	190628_TT1_Hclass_Aging_015_31_18M_SPF_F_Kidney_1_Neg	311.29431:11727 312.29766:5294 313.30102:1065	311.29483:278	3.13416	2.35092	2.49353	2.71639	2.98496	3.32887	2.86916	5.17708	3.26415	2.6426	2.93847	2.92407	3.29429	2.72589	4.27611	2.41231	3.00553	2.45177
1461	4.078	315.251	FA 18:0;2O	[M-H]-		0.214	TRUE	6.05	315.254	C18H36O4	OxFA	VACHUYIREGFMSP-UHFFFAOYSA-N	O=C(O)CCCCCCCC(O)C(O)CCCCCCCC	410	TRUE	TRUE	TRUE		FALSE	FALSE	null	null	100	62.3	5.7	75	100	8.26	190628_TT1_Hclass_Aging_037_13_9w_GF_M_Kidney_1_Neg	315.25595:970 316.2593:292 317.26266:41	71.02294:1 89.02544:8 110.23499:1 126.0103:1 127.10919:2 130.00847:7 141.12775:5 142.00777:4 155.03775:2 158.00156:2 169.02254:2 171.10165:8 172.01894:18 173.99599:11 183.07332:4 184.0107:5 184.02402:6 185.01727:5 185.05164:9 190.02747:2 199.02518:11 199.02914:21 200.02631:4 201.05183:4 211.02905:5 223.09084:5 224.09818:2 227.05972:20 229.03925:10 243.02258:4 255.22498:2 255.23393:8 257.03308:4 2…	0.219649	0.19964	0.116556	0.120255	0.131779	0.309791	0.10769	0.40431	0.293805	0.0955731	0.144979	0.216292	0.193641	0.135713	0.0940767	0.0905387	0.108784	0.137376
1493	7.79	325.309	FA 21:0	[M-H]-		0.571	TRUE	7.9	325.311	C21H42O2	FA	CKDDRHZIAZRDBW-UHFFFAOYSA-N	O=C(O)CCCCCCCCCCCCCCCCCCCC	310	TRUE	TRUE	TRUE		FALSE	FALSE	null	null	100	99.8	58.2	75	100	57.37	190628_TT1_Hclass_Aging_008_43_18M_GF_F_Kidney_1_Neg	325.30936:914 326.31271:410 327.31607:26	225.05731:10 325.31915:24	0.25227	0.204258	0.226233	0.193925	0.276398	0.281786	0.19545	0.312375	0.189619	0.18432	0.203653	0.230161	0.192272	0.221531	0.229722	0.201358	0.181552	0.167627
1505	5.821	327.232	FA 22:6	[M-H]-	adduct linked to 1760_[M+FA-H]-; adduct linked to 1860_[M+C2H3N+Na-2H]-; adduct linked to 3863_[2M+FA-H]-; found in higher mz's MsMs_3863; similar chromatogram in higher mz_2323; found in higher mz's MsMs_3564; found in higher mz's MsMs_1760	0.929	TRUE	5.95	327.233	C22H32O2	FA	MBMBGCFOFBJSGT-UHFFFAOYSA-N	O=C(O)CCC=CCC=CCC=CCC=CCC=CCC=CCC	310	TRUE	TRUE	TRUE		FALSE	FALSE	null	null	100	99.9	20.6	75	100	8827.74	190628_TT1_Hclass_Aging_033_12_24M_SPF_M_Kidney_5_Neg	327.23462:207620 328.23797:102539 329.24133:13556	83.04643:12 107.05973:12 113.05751:10 122.40414:10 129.06348:12 135.0824:24 135.12154:36 139.07851:10 147.11778:24 161.13487:24 167.08023:12 167.10382:12 176.14526:10 182.13158:10 187.15466:12 207.14781:10 217.12651:24 229.1974:48 255.21259:10 283.24438:60 307.20667:12 307.20914:12 310.23978:12 327.23383:95	53.6424	127.704	57.4713	79.1239	31.6708	61.3501	96.2552	85.7718	143.382	109.809	125.471	91.4036	100.23	132.807	77.3026	135.908	105.852	112.347
1514	6.134	329.248	FA 22:5	[M-H]-	similar chromatogram in higher mz_1947	0.929	TRUE	6.17	329.249	C22H34O2	FA	YUFFSWGQGVEMMI-UHFFFAOYSA-N	O=C(O)CCCCCC=CCC=CCC=CCC=CCC=CCC	310	TRUE	TRUE	TRUE		FALSE	FALSE	null	null	100	99.9	59.5	75	100	394.35	190628_TT1_Hclass_Aging_007_28_12M_SPF_F_Kidney_1_Neg	329.24847:15131 330.25182:7988 331.25518:1533	231.13867:10 285.06796:10 329.24985:60	3.70322	4.44536	3.02587	4.68562	2.37776	4.63235	5.29042	4.04344	6.00528	4.73735	5.62416	4.11978	4.93955	7.27825	3.78713	5.19873	4.13673	4.54409
1522	6.503	331.262	FA 22:4	[M-H]-	adduct linked to 1774_[M+FA-H]-; similar chromatogram in higher mz_2068; similar chromatogram in higher mz_2897	0.929	TRUE	6.57	331.264	C22H36O2	FA	IGFLWIHPPADNDL-UHFFFAOYSA-N	O=C(O)CCCCCCCCC=CCC=CCC=CCC=CCC	310	TRUE	TRUE	TRUE		FALSE	FALSE	null	null	100	100	38.1	75	100	165.49	190628_TT1_Hclass_Aging_037_13_9w_GF_M_Kidney_1_Neg	331.26273:11242 332.26608:7143 333.26944:1387	285.26678:10 295.23941:24 296.2507:12 313.2547:48 331.24127:12 331.26938:77	3.44044	3.48517	3.53833	3.75247	4.26423	5.26369	5.5128	4.34488	6.13135	4.8063	6.05159	5.07675	4.41406	4.88166	6.24917	4.22924	4.93314	6.69549
1530	7.199	335.295	FA 22:2	[M-H]-	similar chromatogram in higher mz_5646	0.518	TRUE	7.13	335.296	C22H40O2	FA	HVGRZDASOHMCSK-UHFFFAOYSA-N	O=C(O)CCCCCCCCCCCC=CCC=CCCCCC	310	TRUE	TRUE	TRUE		FALSE	FALSE	null	null	100	99.9	70.6	75	100	27.35	190628_TT1_Hclass_Aging_028_9_18M_SPF_M_Kidney_4_Neg	335.29309:680 336.29644:323 337.2998:14	100.02388:10 335.28491:12 335.29776:36	0.180141	0.153105	0.1777	0.183813	0.177395	0.21229	0.188806	0.179769	0.316378	0.236543	0.264032	0.162467	0.19022	0.313004	0.19654	0.208601	0.188167	0.188981
1538	7.584	337.308	FA 22:1	[M-H]-	similar chromatogram in higher mz_4992	0.929	TRUE	7.69	337.311	C22H42O2	FA	DPUOLQHDNGRHBS-UHFFFAOYSA-N	O=C(O)CCCCCCCCCCCC=CCCCCCCCC	310	TRUE	TRUE	TRUE		FALSE	FALSE	null	null	100	99.8	75	75	100	88.04	190628_TT1_Hclass_Aging_010_8_18M_SPF_M_Kidney_3_Neg	337.31113:2380 338.31448:1196 339.31784:166	337.30902:118	0.606027	0.792875	0.557176	0.664473	0.664976	0.710861	0.716415	0.862619	0.962331	0.812371	0.924112	0.810682	0.891911	1.08637	0.940402	0.81014	0.86329	0.713218
1543	8.039	339.326	FA 22:0	[M-H]-	similar chromatogram in higher mz_6964; similar chromatogram in higher mz_3222; similar chromatogram in higher mz_5669; similar chromatogram in higher mz_5370	1	TRUE	8.13	339.327	C22H44O2	FA	UKMSUNONTOPOIO-UHFFFAOYSA-N	O=C(O)CCCCCCCCCCCCCCCCCCCCC	310	TRUE	TRUE	TRUE		FALSE	FALSE	null	null	100	99.9	75	75	100	341.91	190628_TT1_Hclass_Aging_018_24_24M_GF_M_Kidney_3_Neg	339.32751:4102 340.33086:1956 341.33422:297	339.33319:131	2.04353	1.44011	2.15074	1.95442	3.03395	2.29301	1.83702	2.41937	2.13581	1.81555	1.94886	1.77326	2.34696	1.84775	2.09412	1.49896	1.5046	1.45989
1574	6.192	341.306	FA 21:0;O	[M-H]-	similar chromatogram in higher mz_3850	0.179	TRUE	7.36	341.306	C21H42O3	OxFA	XSZWSIWZVISDOR-UHFFFAOYSA-N	O=C(O)CCCCCCCC(O)CCCCCCCCCCCC	410	TRUE	TRUE	TRUE		FALSE	FALSE	null	null	100	84.1	11.9	75	100	60.27	190628_TT1_Hclass_Aging_006_39_9w_GF_F_Kidney_3_Neg	341.30746:693 342.31081:390 343.31417:50	83.04553:12 89.02235:24 197.01059:10 267.27643:12 268.27545:10 281.28397:48 282.28287:12 323.29694:48 341.30368:24	0.268218	0.287027	0.252984	0.0364738	0.0405473	0.239604	0.19475	0.395766	0.231987	0.0727038	0.0573093	0.369843	0.223063	0.0216209	0.243214	0.126754	0.147373	0.0409282
1630	8.289	353.342	FA 23:0	[M-H]-	similar chromatogram in higher mz_6514; similar chromatogram in higher mz_7554; similar chromatogram in higher mz_5334; similar chromatogram in higher mz_5859; similar chromatogram in higher mz_5747	0.929	TRUE	8.31	353.342	C23H46O2	FA	XEZVDURJDFGERA-UHFFFAOYSA-N	O=C(O)CCCCCCCCCCCCCCCCCCCCCC	310	TRUE	TRUE	TRUE		FALSE	FALSE	null	null	100	100	75	75	100	72.79	190628_TT1_Hclass_Aging_019_17_12M_GF_M_Kidney_2_Neg	353.34167:1283 354.34502:462 355.34838:113	353.32788:12 353.34372:48	0.554196	0.498034	0.481128	0.537717	1.09951	0.548704	0.506281	0.761798	0.665401	0.64546	0.538639	0.463294	0.597002	0.635654	0.696459	0.532005	0.482178	0.506797
1659	6.709	357.277	FA 24:5	[M-H]-	similar chromatogram in higher mz_4544; similar chromatogram in higher mz_5043	0.893	TRUE	6.69	357.28	C24H38O2	FA	NPTIBOCVSPURCS-UHFFFAOYSA-N	O=C(O)CCCCCCCC=CCC=CCC=CCC=CCC=CCC	310	TRUE	TRUE	TRUE		FALSE	FALSE	null	null	100	100	51.6	75	100	33.02	190628_TT1_Hclass_Aging_019_17_12M_GF_M_Kidney_2_Neg	357.27936:1463 358.28271:256 359.28607:482	194.90897:10 357.27386:12	0.332372	0.277791	0.338586	0.274095	0.247339	0.479209	0.5846	0.479841	0.544198	0.346111	0.508279	0.462633	0.554579	0.727792	0.496637	0.364328	0.384419	0.501815
1676	7.032	359.293	FA 24:4	[M-H]-		0.929	TRUE	7.18	359.296	C24H40O2	FA	IWSADGAQVYYXMM-UHFFFAOYSA-N	O=C(O)CCCCCCCCCCC=CCC=CCC=CCC=CCC	310	TRUE	TRUE	TRUE		FALSE	FALSE	null	null	100	99.7	59.2	75	100	64.83	190628_TT1_Hclass_Aging_022_44_18M_GF_F_Kidney_2_Neg	359.29501:2036 360.29836:1186 361.30172:578	343.98575:10 359.29382:36	0.396165	0.395372	0.379476	0.311291	0.719377	0.679743	0.705926	0.547169	0.830362	0.492543	0.71466	0.687841	0.548763	0.598067	0.796735	0.560254	0.619995	0.9264
1699	7.706	363.327	FA 24:2	[M-H]-		0.732	TRUE	7.63	363.327	C24H44O2	FA	SVGHINSTYCDBLY-UHFFFAOYSA-N	O=C(O)CCCCCCCCCCCC=CCC=CCCCCCCC	310	TRUE	TRUE	TRUE		FALSE	FALSE	null	null	100	100	75	75	100	228.34	190628_TT1_Hclass_Aging_QC_Neg_01	363.32541:1549 364.32876:875 365.33212:219	363.33087:113	0.307001	0.288092	0.26483	0.269039	0.421016	0.31394	0.266427	0.325362	0.518846	0.392874	0.434595	0.22851	0.319884	0.57944	0.276031	0.367587	0.298421	0.491494
1707	8.059	365.341	FA 24:1	[M-H]-	similar chromatogram in higher mz_5669; similar chromatogram in higher mz_5198; similar chromatogram in higher mz_5262; similar chromatogram in higher mz_7916; similar chromatogram in higher mz_6964; similar chromatogram in higher mz_3631; found in higher mz's MsMs_4634; similar chromatogram in higher mz_5012; similar chromatogram in higher mz_7361	0.929	TRUE	8.13	365.342	C24H46O2	FA	AVPORSRTKOSBPH-UHFFFAOYSA-N	O=C(O)CCCCCCCCCCCC=CCCCCCCCCCC	310	TRUE	TRUE	TRUE		FALSE	FALSE	null	null	100	99.9	75	75	100	268.05	190628_TT1_Hclass_Aging_032_23_24M_GF_M_Kidney_2_Neg	365.34283:10859 366.34618:6687 367.34954:1094	365.33917:439	1.95581	3.02088	1.87063	2.06492	2.568	1.86947	2.73629	2.59538	4.46958	3.39865	4.45853	2.07739	2.47491	4.13025	2.27644	3.07542	2.91769	3.70631
1716	8.57	367.357	FA 24:0	[M-H]-	similar chromatogram in higher mz_2016; found in higher mz's MsMs_2016; similar chromatogram in higher mz_5870; adduct linked to 2085_[M+Hac-H]-; similar chromatogram in higher mz_4667; similar chromatogram in higher mz_4123	1	TRUE	8.5	367.358	C24H48O2	FA	QZZGJDVWLFXDLK-UHFFFAOYSA-N	O=C(O)CCCCCCCCCCCCCCCCCCCCCCC	310	TRUE	TRUE	TRUE		FALSE	FALSE	null	null	100	100	75	75	100	214.89	190628_TT1_Hclass_Aging_002_4_12M_SPF_M_Kidney_1_Neg	367.35809:8745 368.36144:3980 369.3648:586	367.32724:12 367.35413:293	5.07403	3.10649	4.07067	2.47769	7.59384	3.23379	3.91983	4.71877	5.26903	4.06629	4.16038	2.51097	3.14786	3.79762	4.68779	4.26329	3.85963	3.54153
1722	5.245	369.301	FA 22:1;2O	[M-H]-	similar chromatogram in higher mz_2056	0.946	TRUE	6.62	369.301	C22H42O4	OxFA	UBHSEJBILMDXFU-UHFFFAOYSA-N	O=C(O)CCCCCCCC(O)CCCC=CCCCCC(O)CCC	410	TRUE	TRUE	TRUE		FALSE	FALSE	null	null	100	80.4	13.5	75	100	55.38	190628_TT1_Hclass_Aging_047_1_9w_SPF_M_Kidney_1_Neg	369.30087:1504 370.30422:1344 371.30758:304	279.26743:10 307.28619:24 307.30341:110 308.30063:24 351.28979:72 352.3006:12 369.30478:48	0.548759	0.593946	0.611441	0.594775	0.640986	0.587428	0.590544	0.587155	0.619212	0.623956	0.573775	0.557736	0.600766	0.563806	0.56993	0.570032	0.542818	0.585806
1787	8.881	381.374	FA 25:0	[M-H]-	similar chromatogram in higher mz_6800	0.589	TRUE	8.92	381.374	C25H50O2	FA	MWMPEAHGUXCSMY-UHFFFAOYSA-N	O=C(O)CCCCCCCCCCCCCCCCCCCCCCCC	310	TRUE	TRUE	TRUE		FALSE	FALSE	null	null	100	99.9	75	75	100	29.89	190628_TT1_Hclass_Aging_005_33_18M_SPF_F_Kidney_3_Neg	381.3739:1949 382.37725:931 383.38061:94	381.36169:12 381.37265:60	0.249732	0.198929	0.22929	0.202592	0.658556	0.300802	0.176569	0.26316	0.191008	0.201045	0.195466	0.209027	0.213142	0.315	0.455798	0.209688	0.192945	0.148765
1800	7.594	383.354	FA 24:0;(2OH)	[M-H]-	similar chromatogram in higher mz_2629; similar chromatogram in higher mz_4264	0.929	TRUE	8.12	383.353	C24H48O3	OxFA	MSUOLNSQHLHDAS-UHFFFAOYSA-N	O=C(O)C(O)CCCCCCCCCCCCCCCCCCCCCC	410	TRUE	TRUE	TRUE		FALSE	FALSE	null	null	100	96.6	74.5	86.2	100	62.47	190628_TT1_Hclass_Aging_033_12_24M_SPF_M_Kidney_5_Neg	383.35336:1097 384.35671:538 385.36007:80	116.98136:10 133.08356:24 154.99658:10 300.00272:10 337.34671:113 365.33652:12 383.35187:36	0.345783	0.332496	0.356547	0.44888	0.787632	0.575673	0.275517	0.360906	0.643869	0.389119	0.533522	0.357294	0.284987	0.255792	0.502472	0.424808	0.443221	0.360524
1865	3.647	391.28	ST 24:1;O4	[M-H]-		0.018	TRUE	2.8	391.285	C24H40O4	BA_Unconjugated	RUDATBOHQWOJDD-UZVSRGJWSA-N	C[C@H](CCC(=O)O)[C@H]1CC[C@@H]2[C@@]1(CC[C@H]3[C@H]2[C@H](C[C@H]4[C@@]3(CC[C@H](C4)O)C)O)C	430	TRUE	TRUE	TRUE		FALSE	FALSE	null	null	84.9	91.4	39.3	75	100	2.55	190628_TT1_Hclass_Aging_021_5_12M_SPF_M_Kidney_2_Neg	391.28003:909 392.28338:343 393.28674:75	283.26837:3 297.21643:4 315.26364:3 325.23926:4 327.27234:12 329.28625:8 345.26535:8 347.29459:8 391.25983:4 391.28204:42	0.0180122	0.0278001	0.0281055	0.0152577	0.00907138	0.0158351	0.00881901	0.0178102	0.0108832	0.0186889	0.0138127	0.0216447	0.0149566	0.0202133	0.0169651	0.205508	0.0152789	0.0185103
1866	3.879	391.284	ST 24:1;O4 (CDCA)	[M-H]-		0.018	TRUE	3.067	391.285	C24H40O4	BA_Unconjugated	DGABKXLVXPYZII-SIBKNCMHSA-N	C[C@H](CCC(=O)O)[C@H]1CC[C@@H]2[C@@]1(CC[C@H]3[C@H]2C[C@@H]([C@H]4[C@@]3(CC[C@H](C4)O)C)O)C	430	TRUE	TRUE	TRUE		FALSE	FALSE	null	null	89.7	92.1	78.8	81.3	85.7	2.81	190628_TT1_Hclass_Aging_016_6_12M_SPF_M_Kidney_3_Neg	391.28351:1062 392.28686:690 393.29022:89	294.95789:5 315.2681:6 327.26166:18 343.25717:6 345.2753:24 347.29147:12 355.26678:6 391.28156:73	0.0366248	0.128122	0.11535	0.0211261	0.0372934	0.0395878	0.044683	0.022981	0.0290219	0.0401261	0.019568	0.0577192	0.0245288	0.0331273	0.0640903	0.73983	0.0250018	0.0302335
1867	4.001	391.284	ST 24:1;O4 (DCA)	[M-H]-	adduct linked to 2243_[M+Hac-H]-; found in higher mz's MsMs_2243	0.232	TRUE	3.872	391.285	C24H40O4	BA_Unconjugated	RUDATBOHQWOJDD-BSWAIDMHSA-N	C[C@H](CCC(=O)O)[C@H]1CC[C@@H]2[C@@]1(CC[C@H]3[C@H]2[C@@H](C[C@H]4[C@@]3(CC[C@H](C4)O)C)O)C	330	TRUE	TRUE	TRUE		FALSE	FALSE	null	null	95.6	99.8	81.7	83.2	100	5.53	190628_TT1_Hclass_Aging_012_29_12M_SPF_F_Kidney_2_Neg	391.28558:1460 392.28893:855 393.29229:70	311.23318:5 327.26569:12 329.27963:7 343.26129:26 345.27942:49 346.27896:5 347.28778:12 355.26303:7 356.2663:2 391.28314:107	0.0600407	0.131144	0.11535	0.035797	0.347232	0.0395878	0.850153	0.0499836	0.0393004	0.23416	0.0443157	0.877812	0.0490576	0.468274	1.84291	0.364342	0.0500036	0.0518289
1895	8.579	393.375	FA 26:1	[M-H]-		0.089	TRUE	8.72	393.374	C26H50O2	FA	ALQCJXNGZHBRNR-UHFFFAOYSA-N	O=C(O)CCCCCCCCCCCCCC=CCCCCCCCCCC	310	TRUE	TRUE	TRUE		FALSE	FALSE	null	null	100	99.8	49.5	75	100	9.22	190628_TT1_Hclass_Aging_036_21_18M_GF_M_Kidney_5_Neg	393.37494:632 394.37829:314 395.38165:68	242.9761:10 393.36475:12	0.0996755	0.105504	0.0531189	0.0556135	0.154756	0.0442559	0.0839139	0.0857835	0.252825	0.157354	0.184891	0.0584483	0.0598713	0.156003	0.110121	0.163332	0.166116	0.183999
1916	9.252	395.388	FA 26:0	[M-H]-	similar chromatogram in higher mz_1931; similar chromatogram in higher mz_4927; similar chromatogram in higher mz_6416	0.696	TRUE	9.42	395.389	C26H52O2	FA	XMHIUKTWLZUKEX-UHFFFAOYSA-N	O=C(O)CCCCCCCCCCCCCCCCCCCCCCCCC	310	TRUE	TRUE	TRUE		FALSE	FALSE	null	null	100	99.5	75	75	100	17.01	190628_TT1_Hclass_Aging_005_33_18M_SPF_F_Kidney_3_Neg	395.38849:2356 396.39184:773 397.3952:220	395.38937:74	0.365356	0.191469	0.304574	0.228954	0.796079	0.334685	0.191953	0.366716	0.292068	0.206847	0.338057	0.206716	0.294567	0.355913	0.4135	0.235763	0.289233	0.207488
1967	7.435	403.305	FA 22:0;4O	[M-H]-		0.946	TRUE	6.5	403.306	C22H44O6	OxFA	IDIWWNDEAVLOTJ-UHFFFAOYSA-N	O=C(O)CCCCCCCC(O)C(O)CCCCCCCC(O)CCCCO	410	TRUE	TRUE	TRUE		FALSE	FALSE	null	null	100	89.6	31.5	75	100	521.33	190628_TT1_Hclass_Aging_043_37_9w_GF_F_Kidney_1_Neg	403.3046:25047 404.30795:14366 405.31131:5280	188.28519:10 285.26733:12 343.23621:10 385.28021:12 403.30692:24	10.6975	7.44138	11.8677	8.00726	7.63371	8.09123	7.75365	15.873	8.61827	7.0236	7.44748	4.02369	13.5439	7.22736	6.30095	8.18977	5.49249	5.62495
1989	1.566	407.277	ST 24:1;O5 (omega_MCA)	[M-H]-	ion correlated with 2335; found in higher mz's MsMs_2335	0.375	TRUE	1.617	407.28	C24H40O5	BA_Unconjugated	DKPMWHFRUGMUKF-CRKPLTDNSA-N	C[C@H](CCC(=O)O)[C@H]1CC[C@@H]2[C@@]1(CC[C@H]3[C@H]2[C@H]([C@H]([C@H]4[C@@]3(CC[C@H](C4)O)C)O)O)C	330	TRUE	TRUE	TRUE		FALSE	FALSE	null	null	93.5	99.9	73.2	74.4	100	37.6	190628_TT1_Hclass_Aging_005_33_18M_SPF_F_Kidney_3_Neg	407.28024:2448 408.28359:1098 409.28695:181	78.95715:5 355.21829:2 371.25552:10 389.27051:5 407.27887:150	0.0264179	0.024174	0.228943	0.0622046	1.23371	0.0322357	1.88962	0.0476855	0.0489744	0.388618	0.0379849	2.05384	0.0215375	0.320605	3.18755	0.755156	0.149316	0.0333186
1998	5.793	409.232	LPA 16:0	[M-H]-		0.589	TRUE	5.96	409.236	C19H39O7P	LPA	YNDYKPRNFWPPFU-UHFFFAOYSA-N	O=C(OCC(O)COP(=O)(O)O)CCCCCCCCCCCCCCC	310	TRUE	TRUE	TRUE		FALSE	FALSE	null	null	100	99.7	75.9	37.1	100	36.15	190628_TT1_Hclass_Aging_044_34_24M_SPF_F_Kidney_2_Neg	409.23575:1680 410.2391:513 411.24246:89	78.95791:86 152.98849:36 152.99544:88	0.937236	0.881142	0.90289	0.646693	1.07445	0.78101	0.770194	0.848572	1.09074	0.785482	0.974946	0.876009	1.77445	0.691743	0.644044	1.04287	0.967432	0.82371
1999	6.227	409.235	LPA 16:0	[M-H]-	found in higher mz's MsMs_3092	0.875	TRUE	5.96	409.236	C19H39O7P	LPA	YNDYKPRNFWPPFU-UHFFFAOYSA-N	O=C(OCC(O)COP(=O)(O)O)CCCCCCCCCCCCCCC	310	TRUE	TRUE	TRUE		FALSE	FALSE	null	null	98.7	99	68.9	39.3	100	41.78	190628_TT1_Hclass_Aging_041_46_24M_GF_F_Kidney_2_Neg	409.23038:1572 410.23373:620 411.23709:56	78.95741:48 139.03789:12 150.98222:10 152.99794:101	0.863986	0.705276	0.828527	0.754671	0.715631	0.823991	0.786068	0.8141	0.901492	0.844296	1.11135	0.903065	0.947051	0.939917	1.02419	1.00455	1.28898	1.03781
2163	6.853	437.265	LPA 18:0	[M-H]-	found in higher mz's MsMs_3367; found in higher mz's MsMs_3565	0.411	TRUE	6.89	437.267	C21H43O7P	LPA	LAYXSTYJRSVXIH-UHFFFAOYSA-N	O=C(OCC(O)COP(=O)(O)O)CCCCCCCCCCCCCCCCC	310	TRUE	TRUE	TRUE		FALSE	FALSE	null	null	100	100	78	36.8	100	89.26	190628_TT1_Hclass_Aging_047_1_9w_SPF_M_Kidney_1_Neg	437.2641:1585 438.26745:777 439.27081:182	78.96043:66 152.98485:12 152.99352:100	0.979865	0.844277	0.923384	0.863236	0.854221	0.904297	0.957157	0.875574	1.14636	0.915204	1.07106	0.981827	1.05713	1.01123	1.28055	1.0366	1.44941	1.20749
2324	7.078	465.303	ST 27:1;O;S	[M-H]-	adduct linked to 2937_[M+CH3COONa-H]-; adduct linked to 6987_[2M-H]-; found in higher mz's MsMs_7751; found in higher mz's MsMs_2744; found in higher mz's MsMs_2477; found in higher mz's MsMs_6987; found in higher mz's MsMs_2946; found in higher mz's MsMs_7185; found in higher mz's MsMs_3031; found in higher mz's MsMs_7424	0.929	TRUE	6.72	465.304	C27H46O4S	SSulfate	BHYOQNUELFTYRT-UHFFFAOYSA-N	O=S(=O)(O)OC1CC2=CCC3C(CCC4(C)C(CCC34)C(C)CCCC(C)C)C2(C)CC1	310	TRUE	TRUE	TRUE		FALSE	FALSE	null	null	100	98.4	83.5	84	100	7866.81	190628_TT1_Hclass_Aging_QC_Neg_04	465.30417:394439 466.30752:225782 467.31088:65472	79.95635:1409 96.96041:21695 97.95659:24 99.0598:24 196.03189:12 263.02914:10 280.25974:36 321.89899:10 450.27988:24 463.78104:125 465.02408:24 465.30557:32269	243.994	115.677	87.0826	167.008	90.1579	198.414	115.65	206.344	204.534	146.236	178.723	130.533	277.437	150.773	109.52	167.62	193.344	164.267
2337	7.13	467.321	ST 27:0;O;S	[M-H]-	found in higher mz's MsMs_2750	0.607	TRUE	7.52	467.32	C27H48O4S	SSulfate	CBBTWAWCVXJVTL-UHFFFAOYSA-N	O=S(=O)(O)OC1CCC2(C)C(CCC3C4CCC(C(C)CCCC(C)C)C4(C)CCC32)C1	310	TRUE	TRUE	TRUE		FALSE	FALSE	null	null	100	98.6	87.6	87.6	100	686.54	190628_TT1_Hclass_Aging_033_12_24M_SPF_M_Kidney_5_Neg	467.31982:6511 468.32317:4420 469.32653:1272	96.95885:225 467.3201:1026	5.17491	3.73126	1.96329	4.06501	2.15748	6.51388	3.41531	6.16924	4.21966	5.12349	4.93862	3.69703	7.36223	4.85792	2.87841	5.23733	4.28156	4.34623
2414	7.21	479.321	ST 28:1;O;S	[M-H]-		0.929	TRUE	7.29	479.32	C28H48O4S	SSulfate	NNLNVKVMYKIRMN-UHFFFAOYSA-N	O=S(=O)(O)OC1CC2=CCC3C(CCC4(C)C(CCC34)C(C)CCC(C)C(C)C)C2(C)CC1	310	TRUE	TRUE	TRUE		FALSE	FALSE	null	null	100	99.9	81.4	84.2	100	294.1	190628_TT1_Hclass_Aging_014_11_24M_SPF_M_Kidney_4_Neg	479.32062:12195 480.32397:9964 481.32733:3295	79.95635:105 96.95767:777 192.98053:12 223.11713:12 242.98222:24 243.99399:12 360.82532:10 465.93283:10 479.31766:1177	2.23412	3.58923	2.00193	1.01933	2.59038	2.21239	3.21012	2.02864	2.5642	4.73158	2.56398	3.61827	3.86299	6.84725	2.83568	6.53168	1.54942	2.07809
2433	5.731	483.271	LPG 16:0	[M-H]-		0.929	TRUE	5.79	483.273	C22H45O9P	LPG	BVJSKAUUFXBDOB-UHFFFAOYSA-N	O=C(OCC(O)COP(=O)(O)OCC(O)CO)CCCCCCCCCCCCCCC	310	TRUE	TRUE	TRUE		FALSE	FALSE	null	null	100	100	81.8	94.1	100	154.64	190628_TT1_Hclass_Aging_009_20_18M_GF_M_Kidney_3_Neg	483.27148:6410 484.27483:4546 485.27819:849	78.95961:36 152.99614:136 227.03008:12 245.04179:24 255.23177:565 279.23523:24 280.2305:60 442.15601:10 483.27298:66	1.4077	1.25765	1.27195	1.99561	0.470859	1.3255	0.915044	1.14078	2.60061	2.35986	2.36849	0.813974	1.62725	1.32979	1.04922	1.26171	1.31975	1.92963
2538	5.64	496.265	LPS 16:0	[M-H]-	similar chromatogram in higher mz_3103	0.929	TRUE	5.42	496.268	C22H44NO9P	LPS	XIVOBOJQPNEUSC-UHFFFAOYSA-N	O=C(OCC(O)COP(=O)(O)OCC(N)C(=O)O)CCCCCCCCCCCCCCC	310	TRUE	TRUE	TRUE		FALSE	FALSE	null	null	100	99.3	89.8	90.4	100	23.99	190628_TT1_Hclass_Aging_QC_Neg_04	496.26468:11194 497.26803:5914 498.27139:1390	78.95691:307 96.96747:24 152.9957:1265 170.99625:12 249.07568:12 255.23543:72 391.01013:10 409.23419:217 496.2226:12	3.575	5.65868	3.40746	7.94272	2.66179	4.17332	3.54957	3.79326	7.71618	7.95731	6.17907	3.1532	3.83244	4.90231	4.06428	5.48015	4.83057	5.65752
2549	2.369	498.284	BA 24:1;O3;T (TUDCA)	[M-H]-		0.107	TRUE	2.45	498.289	C26H45NO6S	BA_Conjugated	BHTRKEVKTKCXOH-LBSADWJPSA-N	C[C@H](CCC(=O)NCCS(=O)(=O)O)[C@H]1CC[C@@H]2[C@@]1(CC[C@H]3[C@H]2[C@H](C[C@H]4[C@@]3(CC[C@H](C4)O)C)O)C	330	TRUE	TRUE	TRUE		FALSE	FALSE	null	null	93.3	100	73.2	75	100	19.64	190628_TT1_Hclass_Aging_008_43_18M_GF_F_Kidney_1_Neg	498.28827:736 499.29162:333 500.29498:83	79.95548:2 249.0634:2 250.06998:5 440.741:1 498.29333:153	0.00660448	0.0024174	0.00468425	0.00704203	0.00100793	0.00678647	0.0164622	0.42285	0.027208	0.00109934	0.00805741	0.00120248	0.0358958	0.00168444	0.00125667	0.00139328	0.111119	0.00308505
2550	3.646	498.286	BA 24:1;O3;T (TDCA)	[M-H]-		0.107	TRUE	3.714	498.289	C26H45NO6S	BA_Conjugated	AWDRATDZQPNJFN-VAYUFCLWSA-N	C[C@H](CCC(=O)NCCS(=O)(=O)O)[C@H]1CC[C@@H]2[C@@]1([C@H](C[C@H]3[C@H]2CC[C@H]4[C@@]3(CC[C@H](C4)O)C)O)C	330	TRUE	TRUE	TRUE		FALSE	FALSE	null	null	93.6	100	73.5	75	100	16.61	190628_TT1_Hclass_Aging_023_35_24M_SPF_F_Kidney_3_Neg	498.28937:747 499.29272:411 500.29608:28	83.05298:1 187.02831:1 240.02499:1 249.06906:5 250.0601:2 356.23889:1 498.29123:175	0.00120081	0.0368653	0.00819744	0	0.0337657	0.00226216	0.846625	0.00574524	0.00362773	0.175895	0.00115106	0.535105	0.00179479	0.117911	0.194784	0.0947429	0.00277798	0.00185103
2551	3.334	498.286	BA 24:1;O3;T	[M-H]-		0.036	TRUE	3.536	498.289	C26H45NO6S	BA_Conjugated	BHTRKEVKTKCXOH-BJLOMENOSA-N	C[C@H](CCC(=O)NCCS(=O)(=O)O)[C@H]1CC[C@@H]2[C@@]1(CC[C@H]3[C@H]2[C@@H](C[C@H]4[C@@]3(CC[C@H](C4)O)C)O)C	330	TRUE	TRUE	TRUE		FALSE	FALSE	null	null	91.7	99.6	74.5	75	100	13.69	190628_TT1_Hclass_Aging_029_42_12M_GF_F_Kidney_3_Neg	498.28604:1090 499.28939:691 500.29275:294	205.07861:5 498.28748:279	0.000600407	0.0253827	0.0216647	0.00117367	0.00755948	0.0333668	0.0828987	0.107436	0.0985534	0.00934443	0	0.0144298	0.119054	0.0134755	0.0245051	0.00557311	0.408363	0.0345526
2552	1.585	498.287	BA 24:1;O3;T	[M-H]-	ion correlated with 7680	0.125	TRUE	2.45	498.289	C26H45NO6S	BA_Conjugated	BHTRKEVKTKCXOH-LBSADWJPSA-N	C[C@H](CCC(=O)NCCS(=O)(=O)O)[C@H]1CC[C@@H]2[C@@]1(CC[C@H]3[C@H]2[C@H](C[C@H]4[C@@]3(CC[C@H](C4)O)C)O)C	430	TRUE	TRUE	TRUE		FALSE	FALSE	null	null	92.2	91	75	75	100	40.99	190628_TT1_Hclass_Aging_041_46_24M_GF_F_Kidney_2_Neg	498.28925:1216 499.2926:1105 500.29596:417	498.28699:863	0.10387	0.0271957	0.0778757	0.17253	0.0120952	0.0599472	0.125818	1.97406	0.281754	0.0527685	0.078272	0.0529092	0.233323	0.0230207	0.0973921	0.0362252	0.691717	0.0129572
2553	1.384	498.291	BA 24:1;O3;T	[M-H]-		0.018	TRUE	2.45	498.289	C26H45NO6S	BA_Conjugated	BHTRKEVKTKCXOH-LBSADWJPSA-N	C[C@H](CCC(=O)NCCS(=O)(=O)O)[C@H]1CC[C@@H]2[C@@]1(CC[C@H]3[C@H]2[C@H](C[C@H]4[C@@]3(CC[C@H](C4)O)C)O)C	430	TRUE	TRUE	TRUE		FALSE	FALSE	null	null	90.8	86.8	74	75	100	8.61	190628_TT1_Hclass_Aging_048_40_12M_GF_F_Kidney_1_Neg	498.29141:526 499.29476:231 500.29812:69	496.67383:2 498.29218:145	0.00720489	0.0253827	0.0357174	0.00117367	0.014615	0.00622093	0.229294	0.1804	0.0163248	0.0170398	0.0166903	0.138887	0.00538437	0.0112296	0.0999054	0.0334387	0.167373	0.00123402
2554	3.5	498.292	BA 24:1;O3;T (TCDCA)	[M-H]-		0.125	TRUE	3.536	498.289	C26H45NO6S	BA_Conjugated	BHTRKEVKTKCXOH-BJLOMENOSA-N	C[C@H](CCC(=O)NCCS(=O)(=O)O)[C@H]1CC[C@@H]2[C@@]1(CC[C@H]3[C@H]2[C@@H](C[C@H]4[C@@]3(CC[C@H](C4)O)C)O)C	330	TRUE	TRUE	TRUE		FALSE	FALSE	null	null	93.7	100	74.3	75	100	29.54	190628_TT1_Hclass_Aging_041_46_24M_GF_F_Kidney_2_Neg	498.28931:1107 499.29266:882 500.29602:278	79.95854:5 91.04174:5 155.07133:2 249.06825:5 498.26187:15 498.29007:380	0.00480326	0.0556002	0.02752	0.0199524	0.00251983	0.0169662	0.0887781	2.77323	0.0253941	0.00439738	0.0040287	0.0138286	0.0634159	0.014037	0.189757	0.0487647	0.15765	0.0357866
2609	5.318	507.27	LPG 18:2	[M-H]-		0.929	TRUE	5.55	507.273	C24H45O9P	LPG	VEEHTGYBVMTAAF-UHFFFAOYSA-N	O=C(OCC(O)COP(=O)(O)OCC(O)CO)CCCCCCCC=CCC=CCCCCC	310	TRUE	TRUE	TRUE		FALSE	FALSE	null	null	100	99.3	87.3	91.2	100	83.12	190628_TT1_Hclass_Aging_029_42_12M_GF_F_Kidney_3_Neg	507.27023:1466 508.27358:1068 509.27694:231	152.9937:12 176.87061:10 227.0311:12 245.04501:12 279.23151:332 333.27328:10 507.27795:24	0.681683	0.815962	0.613374	0.718118	0.518663	0.623445	0.778121	0.669232	1.10475	0.790158	0.921125	0.462006	0.675185	0.916262	0.611325	0.870617	0.603179	1.00531
2636	5.724	509.289	LPG 18:1	[M-H]-	adduct linked to 1783_[M-C6H10O4-H]-; adduct linked to 2601_[M+Hac-H]-	0.929	TRUE	6.07	509.289	C24H47O9P	LPG	FQQQKGAFQIIGLQ-UHFFFAOYSA-N	O=C(OCC(O)COP(=O)(O)OCC(O)CO)CCCCCCCC=CCCCCCCCC	310	TRUE	TRUE	TRUE		FALSE	FALSE	null	null	100	98.6	93.8	63.9	100	29.56	190628_TT1_Hclass_Aging_015_31_18M_SPF_F_Kidney_1_Neg	509.28934:1923 510.29269:1339 511.29605:371	152.98853:12 227.02898:10 281.23553:12 281.24496:191 304.2374:10	0.625148	0.808867	0.634074	0.625258	0.5334	0.70984	0.862028	0.728357	1.17129	1.0492	1.09986	0.634088	0.749322	0.810801	0.829624	0.820397	0.69519	0.945112
2656	1.298	512.266	BA 24:1;O3;G;S	[M-H]-		0.179	TRUE	2.27	512.269	C26H43NO7S	BASulfate	FHXBAFXQVZOILS-UHFFFAOYSA-N	C[C@H](CCC(=O)NCC(O)=O)[C@H]1CC[C@H]2[C@@H]3CC[C@@H]4C[C@@H](CC[C@]4(C)[C@H]3CC[C@]12C)OS(O)(=O)=O	410	TRUE	TRUE	TRUE		FALSE	FALSE	null	null	100	88.9	87.8	86.8	100	31.3	190628_TT1_Hclass_Aging_048_40_12M_GF_F_Kidney_1_Neg	512.26611:3705 513.26946:1325 514.27282:8447	79.95405:2 80.96241:2 96.97449:1 124.00746:5 205.03889:4 206.04897:2 332.2399:1 480.26218:1 510.58789:2 512.27002:465	0.0936635	0.0012087	0.00819744	0.0710072	0.00100793	0.0463742	0.0887781	1.25993	0.100972	0.0296823	0.059855	0.00781614	0.443911	0.00112296	0.0314168	0.00278655	1.24106	0.0475098
2668	2.839	514.282	BA 24:1;O4;T (TCA)	[M-H]-	similar chromatogram in higher mz_7681; found in higher mz's MsMs_7681	0.393	TRUE	2.849	514.284	C26H45NO7S	BA_Conjugated	WBWWGRHZICKQGZ-HZAMXZRMSA-N	C[C@H](CCC(=O)NCCS(=O)(=O)O)[C@H]1CC[C@@H]2[C@@]1([C@H](C[C@H]3[C@H]2[C@@H](C[C@H]4[C@@]3(CC[C@H](C4)O)C)O)O)C	330	TRUE	TRUE	TRUE		FALSE	FALSE	null	null	93.7	100	74.9	75	100	374.01	190628_TT1_Hclass_Aging_019_17_12M_GF_M_Kidney_2_Neg	514.28436:1696 515.28771:1712 516.29107:571	512.61346:8 514.23846:16 514.28302:660	0.140495	0.0441175	0.119448	0.0880254	0.0181428	0.24601	0.44389	7.90717	0.417189	0.113782	0.325174	0.134678	0.732274	0.097136	0.274583	0.0431916	2.6488	0.311591
2669	1.129	514.283	BA 24:1;O4;T	[M-H]-		0.018	TRUE	1.289	514.284	C26H45NO7S	BA_Conjugated	XSOLDPYUICCHJX-UHFFFAOYNA-N	CC(CCC(=O)NCCS(=O)(=O)O)C1CCC2C1(CCC3C2C(C(C4C3(CCC(C4)O)C)O)O)C	330	TRUE	TRUE	TRUE		FALSE	FALSE	null	null	93.2	99.7	75	75	100	43.77	190628_TT1_Hclass_Aging_047_1_9w_SPF_M_Kidney_1_Neg	514.28259:960 515.28594:829 516.2893:327	430.28738:2 507.79843:1 512.62012:2 514.28015:274	8.19736	0.0429088	1.21439	7.98215	0.0458609	6.84416	4.71112	149.729	13.5967	0.358386	4.67387	0.565167	30.1166	0.12914	1.54885	0.103799	118.749	2.39647
2670	1.214	514.284	BA 24:1;O4;T (TMCA)	[M-H]-	found in higher mz's MsMs_7604; found in higher mz's MsMs_7668; adduct linked to 2857_[M+Na-2H]-; found in higher mz's MsMs_7772; found in higher mz's MsMs_7696; found in higher mz's MsMs_7141; found in higher mz's MsMs_3458	0.732	TRUE	1.289	514.284	C26H45NO7S	BA_Conjugated	XSOLDPYUICCHJX-UHFFFAOYNA-N	CC(CCC(=O)NCCS(=O)(=O)O)C1CCC2C1(CCC3C2C(C(C4C3(CCC(C4)O)C)O)O)C	330	TRUE	TRUE	TRUE		FALSE	FALSE	null	null	93.7	99.9	75	74.9	100	2903.1	190628_TT1_Hclass_Aging_034_32_18M_SPF_F_Kidney_2_Neg	514.2843:6370 515.28765:5421 516.29101:1795	79.95885:10 101.60845:2 124.00557:7 403.57217:2 448.31046:5 487.83826:2 496.27805:7 512.62457:12 514.28778:2236	8.93166	0.0247783	1.23664	8.39939	0.0897058	6.96066	4.9069	160.705	14.3459	0.380373	4.85516	0.618677	30.113	0.142054	1.54319	0.101013	124.63	2.39647
2671	1.587	514.285	BA 24:1;O4;T	[M-H]-	found in higher mz's MsMs_7680	0.732	TRUE	1.289	514.284	C26H45NO7S	BA_Conjugated	XSOLDPYUICCHJX-UHFFFAOYNA-N	CC(CCC(=O)NCCS(=O)(=O)O)C1CCC2C1(CCC3C2C(C(C4C3(CCC(C4)O)C)O)O)C	330	TRUE	TRUE	TRUE		FALSE	FALSE	null	null	93.5	98.9	75	74.8	100	588.95	190628_TT1_Hclass_Aging_048_40_12M_GF_F_Kidney_1_Neg	514.28455:138696 515.2879:154931 516.29126:49150	79.95772:65 80.96231:24 106.97859:36 124.00574:203 286.66577:10 371.25418:36 430.30353:12 432.30884:24 496.2724:36 512.60297:84 514.28528:26383	1.68534	0.424254	1.85262	1.06041	0.13859	1.36238	3.41943	58.5486	5.22454	1.36099	2.66643	1.44659	3.63864	0.688374	3.54005	0.698032	15.9776	1.06558
2719	5.636	522.282	LPS 18:1	[M-H]-		0.196	TRUE	5.65	522.284	C24H46NO9P	LPS	JZWNYZVVZXZRRH-UHFFFAOYSA-N	O=C(OCC(O)COP(=O)(O)OCC(N)C(=O)O)CCCCCCCC=CCCCCCCCC	310	TRUE	TRUE	TRUE		FALSE	FALSE	null	null	100	100	86.6	85.2	100	24.73	190628_TT1_Hclass_Aging_040_25_9w_SPF_F_Kidney_1_Neg	522.28265:808 523.286:589 524.28936:107	133.08788:10 152.99661:48 281.25351:10 435.2095:12	0.558138	0.979717	0.563004	0.654598	0.61325	0.698193	0.791055	0.611105	0.726794	0.793301	0.62814	0.70071	0.452369	0.544625	0.609303	0.692911	0.83614	0.703549
2730	6.25	524.297	LPS 18:0	[M-H]-	similar chromatogram in higher mz_3372; similar chromatogram in higher mz_3020	0.929	TRUE	6.2	524.299	C24H48NO9P	LPS	ZPDQFUYPBVXUKS-UHFFFAOYSA-N	O=C(OCC(O)COP(=O)(O)OCC(N)C(=O)O)CCCCCCCCCCCCCCCCC	310	TRUE	TRUE	TRUE		FALSE	FALSE	null	null	100	100	91.3	92.9	100	1893.48	190628_TT1_Hclass_Aging_045_30_12M_SPF_F_Kidney_3_Neg	524.29883:18621 525.30218:13468 526.30554:4872	78.95893:457 82.27793:10 152.99487:1914 170.99535:12 171.00636:48 283.25293:12 283.26239:129 284.26242:10 437.26721:457 452.47891:10 524.29004:36	15.598	18.8783	14.6639	32.1124	15.4882	18.2198	14.5982	17.1612	25.2891	27.4904	21.4506	13.7088	16.45	17.121	20.6453	17.2167	15.8482	19.4855
2765	5.303	531.27	LPG 20:4	[M-H]-		0.929	TRUE	5.41	531.273	C26H45O9P	LPG	IBHAQCAKDSJHDI-UHFFFAOYSA-N	O=C(OCC(O)COP(=O)(O)OCC(O)CO)CCCCCCC=CCC=CCC=CCC=CCC	310	TRUE	TRUE	TRUE		FALSE	FALSE	null	null	100	99.9	81.2	90.4	100	50.63	190628_TT1_Hclass_Aging_048_40_12M_GF_F_Kidney_1_Neg	531.27106:1797 532.27441:1503 533.27777:4311	81.01753:3 137.03993:3 152.99673:20 171.00282:4 171.00465:8 222.99474:3 245.0443:12 259.24091:20 303.23373:133 531.27362:12	0.534446	0.895784	0.508188	0.623047	0.545621	0.63045	0.744308	0.800539	1.12017	1.20646	1.16793	0.663354	0.737218	0.72424	0.872335	0.886171	1.08043	1.18043
2913	8.389	540.463	Cer 30:1;2O|Cer 15:1;2O/15:0	[M+CH3COO]-	adduct linked to 2423_[M-H]-	0.946	TRUE	8.58	540.463	C30H59NO3	Cer_NS	VHWAYGFKLPIESY-UHFFFAOYSA-N	O=C(NC(CO)C(O)C=CCCCCCCCCCC)CCCCCCCCCCCCCC	310	TRUE	TRUE	TRUE		FALSE	FALSE	null	null	100	99.5	93	93.6	100	754.87	190628_TT1_Hclass_Aging_Blank_Neg	540.46326:5540 541.46661:6363 542.46997:1772	195.17279:63 221.18294:12 221.19128:36 223.21011:82 226.22496:12 240.2301:48 241.21651:36 266.24728:206 275.02057:10 282.2406:36 432.41638:24 448.40579:12 448.42065:36 450.43494:60 480.41833:12 480.44293:198	1.38094	1.20106	1.3273	1.31589	1.40922	1.37695	1.43952	1.27368	1.13979	1.41632	1.26763	1.5856	1.32627	1.29208	1.31585	1.20169	1.3687	1.4139
2929	5.206	544.264	LPS 20:4	[M-H]-		0.929	TRUE	5.13	544.268	C26H44NO9P	LPS	XKQPGKKDUSIGIL-UHFFFAOYSA-N	O=C(OCC(O)COP(=O)(O)OCC(N)C(=O)O)CCCCCCC=CCC=CCC=CCC=CCC	310	TRUE	TRUE	TRUE		FALSE	FALSE	null	null	100	99.9	73	77.3	100	553.59	190628_TT1_Hclass_Aging_030_3_9w_SPF_M_Kidney_3_Neg	544.26935:9533 545.2727:7868 546.27606:1965	78.95725:242 96.97066:36 150.98067:48 152.99463:1660 165.9819:10 171.00435:48 285.21948:10 303.23648:48 457.24231:103 544.24451:12	4.75475	7.97898	4.71946	9.49404	3.4257	5.95323	6.38515	6.24525	9.91383	12.0549	9.54844	5.86944	5.45381	8.68241	4.95747	6.88945	8.14506	11.1994
2979	5.268	555.273	LPG 22:6	[M-H]-		0.929	TRUE	5.35	555.273	C28H45O9P	LPG	MGCOSBZSSKOQOR-UHFFFAOYSA-N	O=C(OCC(O)COP(=O)(O)OCC(O)CO)CCC=CCC=CCC=CCC=CCC=CCC=CCC	310	TRUE	TRUE	TRUE		FALSE	FALSE	null	null	100	99.9	74.7	96.3	100	91.16	190628_TT1_Hclass_Aging_016_6_12M_SPF_M_Kidney_3_Neg	555.27252:6294 556.27587:3320 557.27923:1050	152.99435:68 227.03407:12 245.04153:24 249.18919:12 283.24307:146 326.18222:12 327.22989:370 555.26636:48	1.41217	2.85188	1.35432	0.819822	1.55923	1.25895	1.31663	2.23549	3.39418	2.2436	3.12004	1.2315	2.46811	1.86617	1.70498	2.79717	1.70033	2.55623
3070	5.173	568.265	LPS 22:6	[M-H]-	similar chromatogram in higher mz_3734	0.929	TRUE	5.14	568.268	C28H44NO9P	LPS	FZUFCKYWYUGORZ-UHFFFAOYSA-N	O=C(O)C(N)COP(=O)(O)OCC(O)COC(=O)CCC=CCC=CCC=CCC=CCC=CCC=CCC	310	TRUE	TRUE	TRUE		FALSE	FALSE	null	null	100	100	69.7	74.8	100	125.79	190628_TT1_Hclass_Aging_035_16_12M_GF_M_Kidney_1_Neg	568.26392:1599 569.26727:1262 570.27063:442	78.95857:77 93.38226:2 96.96937:17 150.97739:7 152.99655:385 165.99658:2 171.00639:19 327.23883:5 481.23392:24 568.27173:5	0.895939	1.48509	0.770539	1.81947	0.622002	0.868954	0.87685	0.761817	1.58949	1.7411	1.24711	0.819699	0.894975	1.36397	0.836564	1.68452	1.50522	1.72565
3075	8.978	568.494	Cer 32:1;2O|Cer 16:1;2O/16:0	[M+CH3COO]-	adduct linked to 2632_[M-H]-; adduct linked to 3107_[M+C2H3N+Na-2H]-; similar chromatogram in higher mz_6051; similar chromatogram in higher mz_5444; similar chromatogram in higher mz_6713	0.929	TRUE	8.93	568.495	C32H63NO3	Cer_NS	PIVKMDKERPTVGC-UHFFFAOYSA-N	O=C(NC(CO)C(O)C=CCCCCCCCCCCC)CCCCCCCCCCCCCCC	310	TRUE	TRUE	TRUE		FALSE	FALSE	null	null	100	100	97.6	82.6	100	626.41	190628_TT1_Hclass_Aging_020_7_18M_SPF_M_Kidney_1_Neg	568.49268:1954 569.49603:1394 570.49939:585	209.18459:12 235.20432:24 237.2211:24 254.2446:12 280.25931:36 460.44962:12 478.45358:24 508.46973:113	0.325159	0.589788	0.180651	0.282455	0.270193	0.158157	0.366742	0.3459	0.713178	0.588854	0.551649	0.29345	0.160472	0.447848	0.299656	0.53813	0.54053	0.481328
3103	5.638	571.289	LPI 16:0	[M-H]-	similar chromatogram in higher mz_7163	0.929	TRUE	5.51	571.289	C25H49O12P	LPI	UOXRPRZMAROFPH-UHFFFAOYSA-N	O=C(OCC(O)COP(=O)(O)OC1C(O)C(O)C(O)C(O)C1O)CCCCCCCCCCCCCCC	310	TRUE	TRUE	TRUE		FALSE	FALSE	null	null	100	99.8	94.7	98.8	100	168.53	190628_TT1_Hclass_Aging_005_33_18M_SPF_F_Kidney_3_Neg	571.28772:9610 572.29107:6243 573.29443:1486	78.9585:106 96.96789:48 152.99635:606 167.07401:10 204.98534:12 222.99675:24 241.00986:470 255.23209:1076 257.81482:10 315.04843:295 391.23669:89 571.2926:885	8.42939	5.07851	7.18959	10.8202	5.10567	9.35422	5.49869	5.43216	7.98198	8.95148	7.35778	4.18244	7.03529	7.39771	5.28779	4.8244	5.65307	7.58861
3122	7.837	574.448	SL 32:0;O|SL 17:0;O/15:0	[M-H]-		0.464	TRUE	8.43	574.451	C32H65NO5S	SL	UZFRGLUXGJMVAG-UHFFFAOYSA-N	O=C(N(CC(O)CCCCCCCCCCCCCC)CS(=O)(=O)O)CCCCCCCCCCCCCC	410	TRUE	TRUE	TRUE		FALSE	FALSE	null	null	100	95.9	72.8	72.7	100	338.64	190628_TT1_Hclass_Aging_028_9_18M_SPF_M_Kidney_4_Neg	574.4436:1986 575.44695:943 576.45031:367	80.9932:10 266.25058:10 333.2019:36 476.48029:10 574.45502:453	0.00624105	0.519344	0.237335	0.0014635	0.523689	0.00652195	0.442751	0.00122909	0.00351046	0.68274	0.00123293	0.337939	0.00242293	0.565492	0.232584	1.02852	0.00097174	0.00222837
3179	9.373	582.506	Cer 33:1;2O|Cer 17:1;2O/16:0	[M+CH3COO]-	adduct linked to 2723_[M-H]-; similar chromatogram in higher mz_5636	0.536	TRUE	9.12	582.51	C33H65NO3	Cer_NS	KXVLPPCAUYSNGY-UHFFFAOYSA-N	O=C(NC(CO)C(O)C=CCCCCCCCCCCCC)CCCCCCCCCCCCCCC	310	TRUE	TRUE	TRUE		FALSE	FALSE	null	null	100	99.3	91.1	91.7	100	564.09	190628_TT1_Hclass_Aging_014_11_24M_SPF_M_Kidney_4_Neg	582.50555:6666 583.5089:4338 584.51226:910	223.19502:12 223.2034:48 237.22411:60 249.21095:12 254.2455:116 255.23782:36 263.23914:36 280.26501:237 296.25937:36 474.4606:60 490.46228:65 492.47531:48 522.49158:306	0.334104	0.639367	0.350269	0.480654	0.42028	0.308978	0.425015	0.466175	0.744033	0.796254	0.668601	0.453873	0.422335	1.21208	0.308117	0.593764	0.383351	0.583554
3222	8.051	588.462	SL 33:0;O|SL 17:0;O/16:0	[M-H]-	similar chromatogram in higher mz_4429; similar chromatogram in higher mz_6964; found in higher mz's MsMs_4429; similar chromatogram in higher mz_3609	0.482	TRUE	8.5	588.467	C33H67NO5S	SL	VAIOFNYDSDBPOE-UHFFFAOYSA-N	O=C(N(CC(O)CCCCCCCCCCCCCC)CS(=O)(=O)O)CCCCCCCCCCCCCCC	310	TRUE	TRUE	TRUE		FALSE	FALSE	null	null	100	97.6	74.9	75	100	514.73	190628_TT1_Hclass_Aging_028_9_18M_SPF_M_Kidney_4_Neg	588.46564:5014 589.46899:3675 590.47235:1038	80.96524:36 330.17487:10 333.20889:70 350.22668:12 350.23718:60 588.46423:1270	0.00104018	0.901105	0.1363	0.00209071	0.715709	0.00203811	0.840952	0.00158025	0.000554284	1.597	0.00176133	0.868298	0.00205017	1.20408	0.395208	1.53286	0.000728805	0.00167128
3305	9.124	594.509	Cer 34:2;2O|Cer 18:2;2O/16:0	[M+CH3COO]-	adduct linked to 2800_[M-H]-	0.929	TRUE	8.95	594.51	C34H65NO3	Cer_NS	GMWIWVUTMCBDSP-UHFFFAOYSA-N	O=C(NC(CO)C(O)C=CCCC=CCCCCCCCCC)CCCCCCCCCCCCCCC	310	TRUE	TRUE	TRUE		FALSE	FALSE	null	null	100	99.7	91	94	100	8152.15	190628_TT1_Hclass_Aging_023_35_24M_SPF_F_Kidney_3_Neg	594.51025:18126 595.5136:12673 596.51696:3441	75.04088:12 91.04072:36 174.12082:10 191.12878:48 233.18356:12 235.19598:36 235.20461:164 237.22139:293 244.23717:10 249.07082:24 253.25227:48 254.25385:117 255.23274:92 261.20224:12 261.22263:144 266.24591:36 280.26199:657 294.25705:12 296.25623:183 469.87579:10 486.46591:115 498.46576:12 502.45941:133 504.48114:205 534.44678:12 534.48895:841	5.955	13.3311	5.31353	13.6128	5.20084	4.68867	6.75379	5.34442	12.656	11.2339	8.75311	5.89838	4.66264	10.255	4.2637	11.9242	8.83992	9.05191
3310	5.214	595.286	LPI 18:2	[M-H]-		0.804	TRUE	5.24	595.289	C27H49O12P	LPI	SAHCQBPGXQFTRA-UHFFFAOYSA-N	O=C(OCC(O)COP(=O)(O)OC1C(O)C(O)C(O)C(O)C1O)CCCCCCCC=CCC=CCCCCC	310	TRUE	TRUE	TRUE		FALSE	FALSE	null	null	100	100	70	93.6	100	12.06	190628_TT1_Hclass_Aging_027_15_9w_GF_M_Kidney_3_Neg	595.28912:2366 596.29247:1804 597.29583:736	73.02685:18 75.04712:24 78.95695:24 91.03959:30 118.93725:5 133.0871:18 150.98529:5 152.99408:103 165.02078:5 191.12541:60 193.13104:18 210.0022:5 222.99178:12 222.99597:12 228.09448:5 241.00903:82 249.04494:6 249.06708:79 251.08006:12 278.30902:6 279.22992:248 315.03491:6 315.04486:94 390.20895:5 497.16461:5 595.29077:84	0.795283	0.681543	0.754101	1.3778	0.624262	0.806976	0.599146	0.624583	1.0562	1.14306	0.955176	0.594436	0.729949	1.11521	0.503207	0.917482	0.782755	1.12102
3353	9.803	596.5	Cer 33:2;3O|Cer 18:1;2O/15:1;O	[M+CH3COO]-		0.071	TRUE	8.6	596.49	C33H63NO4	Cer_AS	SAVXRZKGXOIPPJ-UHFFFAOYSA-N	O=C(NC(CO)C(O)C=CCCCCCCCCCCCCC)C(O)CCCCCCC=CCCCCC	410	TRUE	TRUE	TRUE		FALSE	FALSE	null	null	100	84.8	69.6	79.7	100	1051.17	190628_TT1_Hclass_Aging_017_18_12M_GF_M_Kidney_3_Neg	596.50043:10987 597.50378:12306 598.50714:4332	225.22841:12 235.20639:36 237.22102:1744 239.23557:24 246.67964:10 250.24348:24 253.25188:164 254.24673:512 255.23456:459 260.06665:10 263.23352:392 266.25235:120 268.2645:94 278.24924:24 280.26385:2675 281.2468:24 294.23489:24 296.25089:70 296.25812:356 298.27621:77 308.26227:12 445.13544:10 488.47894:433 504.48001:337 506.48364:252 506.48996:693 507.48856:24 518.49951:24 536.50452:3304 537.5062…	1.82218	2.47979	1.57048	2.90295	1.60048	1.67207	1.65277	3.40229	2.79377	3.54731	2.83768	2.1302	1.9443	3.79461	2.23504	3.33257	2.66913	2.83393
3354	9.801	596.523	Cer 34:1;2O|Cer 18:1;2O/16:0	[M+CH3COO]-	ion correlated with 3355; adduct linked to 2861_[M-H]-; adduct linked to 3377_[M+C2H3N+Na-2H]-	0.804	TRUE	9.38	596.526	C34H67NO3	Cer_NS	YDNKGFDKKRUKPY-UHFFFAOYSA-N	O=C(NC(CO)C(O)C=CCCCCCCCCCCCCC)CCCCCCCCCCCCCCC	310	TRUE	TRUE	TRUE		FALSE	FALSE	null	null	100	98.1	90.9	92.5	100	21330.2	190628_TT1_Hclass_Aging_032_23_24M_GF_M_Kidney_2_Neg	596.52588:129092 597.52923:68464 598.53259:15943	151.32803:10 236.45432:24 237.22107:1622 238.22295:24 239.23778:76 250.248:36 253.24525:36 253.24973:131 254.24681:597 255.22792:321 258.95215:10 263.2359:494 266.24557:135 268.26001:145 279.34607:24 280.26398:2898 281.26578:36 294.24707:48 296.25104:154 296.2583:410 298.27393:60 310.27643:24 488.45468:12 488.4826:385 504.47745:434 506.48108:266 506.49689:512 507.51129:36 510.41153:10 536.50519:3…	20.1232	40.9571	17.8414	45.3128	20.7373	19.4156	18.5132	22.2229	40.6234	35.0763	39.632	20.551	18.2491	46.6341	17.2294	39.2728	27.4201	31.2548
3355	9.859	596.526	Cer 34:1;2O|Cer 18:1;2O/16:0	[M+CH3COO]-	ion correlated with 3354; adduct linked to 2861_[M-H]-	0.143	TRUE	9.38	596.526	C34H67NO3	Cer_NS	YDNKGFDKKRUKPY-UHFFFAOYSA-N	O=C(NC(CO)C(O)C=CCCCCCCCCCCCCC)CCCCCCCCCCCCCCC	310	TRUE	TRUE	TRUE		FALSE	FALSE	null	null	100	97.4	89.8	91.9	100	20000.4	190628_TT1_Hclass_Aging_QC_Neg_04	596.52643:140829 597.52978:74874 598.53314:16240	83.04754:12 207.21204:12 225.2283:12 235.20415:48 236.44771:24 237.22308:1470 239.23329:48 250.25673:60 253.25179:116 254.24664:619 255.23:455 263.23572:552 266.24771:93 268.26215:87 278.2562:36 280.26379:3090 281.27029:36 288.30435:10 296.25568:437 298.27615:60 488.48221:403 504.44238:12 504.48019:342 506.49332:670 518.47736:12 518.49335:36 533.57013:10 534.74756:24 536.50153:3803 537.5:60	21.3494	43.3406	18.4961	48.3721	21.191	20.9029	19.3394	23.0081	42.5729	34.8862	41.9374	20.7201	18.0111	46.896	17.7765	39.7229	27.2777	31.0448
3357	5.761	597.303	LPI 18:1	[M-H]-		0.929	TRUE	5.61	597.304	C27H51O12P	LPI	UGDOFRYHDCDVHD-UHFFFAOYSA-N	O=C(OCC(O)COP(=O)(O)OC1C(O)C(O)C(O)C(O)C1O)CCCCCCCC=CCCCCCCCC	310	TRUE	TRUE	TRUE		FALSE	FALSE	null	null	100	99.7	97.2	98.8	100	12.71	190628_TT1_Hclass_Aging_026_2_9w_SPF_M_Kidney_2_Neg	597.30206:3217 598.30541:2962 599.30877:787	78.95213:10 152.9944:60 241.0117:60 263.23297:10 281.24866:129 315.03802:12 315.04303:24 597.27631:12 597.30713:146	2.18126	1.75918	1.89418	2.28682	1.42226	2.63091	1.91176	1.97298	2.95772	2.91335	2.61941	1.53169	1.99156	2.45707	1.6014	1.43073	2.04562	3.03683
3370	10.161	598.542	Cer 34:0;2O|Cer 18:0;2O/16:0	[M+CH3COO]-		0.929	TRUE	9.97	598.542	C34H69NO3	Cer_NDS	GCGTXOVNNFGTPQ-UHFFFAOYSA-N	O=C(NC(CO)C(O)CCCCCCCCCCCCCCC)CCCCCCCCCCCCCCC	310	TRUE	TRUE	TRUE		FALSE	FALSE	null	null	100	99.6	92.8	95.5	100	518.9	190628_TT1_Hclass_Aging_014_11_24M_SPF_M_Kidney_4_Neg	598.54193:6849 599.54528:4809 600.54864:1126	237.21648:12 237.22511:36 239.23534:24 254.25099:24 268.2735:12 280.26132:255 284.50403:10 296.26038:78 300.28391:24 326.31464:10 490.49722:60 498.29236:10 506.50266:71 538.50891:82 538.51874:330	0.893719	1.46404	0.541954	1.17665	0.80299	1.90726	1.09284	0.686006	1.02801	1.03653	1.09713	1.60598	0.711594	1.24535	1.21926	1.55168	1.427	1.12254
3372	6.246	599.322	LPI 18:0	[M-H]-	found in higher mz's MsMs_7780; adduct linked to 8000_[2M-H]-	0.929	TRUE	6.19	599.32	C27H53O12P	LPI	MXAFDFDAIFZFET-UHFFFAOYSA-N	O=C(OCC(O)COP(=O)(O)OC1C(O)C(O)C(O)C(O)C1O)CCCCCCCCCCCCCCCCC	310	TRUE	TRUE	TRUE		FALSE	FALSE	null	null	100	100	95.7	98.7	100	2866.82	190628_TT1_Hclass_Aging_018_24_24M_GF_M_Kidney_3_Neg	599.3197:97197 600.32305:74339 601.32641:18754	78.95961:842 96.9691:171 134.98511:24 150.96828:12 152.98911:383 152.99605:3887 170.83151:12 171.00949:62 177.32141:12 207.62358:10 222.99207:36 223.00253:163 241.01369:3370 242.01042:24 259.02576:111 275.23203:10 282.34628:36 283.26437:10965 284.26443:60 285.4393:24 288.29413:36 305.51041:10 314.02716:24 315.05017:2287 333.04401:12 333.05682:60 391.22742:10 409.23499:24 419.22653:12 419.25812:60…	59.9455	46.578	59.673	96.4264	29.4243	69.7551	44.4517	53.1138	79.277	92.15	69.6487	37.1511	63.2522	78.4199	52.3335	52.3967	44.7651	74.7835
3445	10.331	610.539	Cer 35:1;2O|Cer 18:1;2O/17:0	[M+CH3COO]-	adduct linked to 2950_[M-H]-; adduct linked to 3473_[M+C2H3N+Na-2H]-	0.232	TRUE	10.14	610.542	C35H69NO3	Cer_NS	ICWGMOFDULMCFL-UHFFFAOYSA-N	O=C(NC(CO)C(O)C=CCCCCCCCCCCCCC)CCCCCCCCCCCCCCCC	310	TRUE	TRUE	TRUE		FALSE	FALSE	null	null	100	99.5	98.4	74.5	100	194.39	190628_TT1_Hclass_Aging_024_10_24M_SPF_M_Kidney_3_Neg	610.53802:1815 611.54137:1249 612.54473:307	125.03899:10 237.21878:36 268.25525:12 268.25754:24 294.28537:74 310.28116:24 502.49609:24 518.48999:24 550.50146:12 550.51129:84	0.0796774	0.0884165	0.0666355	0.121888	0.107205	0.0737796	0.0897325	0.102716	0.109379	0.182095	0.0988106	0.10651	0.0799565	0.417482	0.0901857	0.121787	0.0714229	0.0612801
3462	9.427	612.516	Cer 34:1;3O|Cer 18:1;2O/16:0;(2OH)	[M+CH3COO]-		0.125	TRUE	9.07	612.521	C34H67NO4	Cer_AS	YWZGQPJRQXHVQX-UHFFFAOYSA-N	O=C(NC(CO)C(O)C=CCCCCCCCCCCCCC)C(O)CCCCCCCCCCCCCC	310	TRUE	TRUE	TRUE		FALSE	FALSE	null	null	100	98.4	79.2	79.5	100	175.89	190628_TT1_Hclass_Aging_027_15_9w_GF_M_Kidney_3_Neg	612.51648:1221 613.51983:750 614.52319:560	225.21986:24 268.25525:12 271.29111:10 296.26535:36 504.49289:12 520.48627:12 552.44952:12 552.50232:107	0.0482641	0.134071	0.0359139	0.113316	0.0760868	0.0501375	0.0382155	0.0347656	0.135799	0.0723652	0.104447	0.0558849	0.0478994	0.0803689	0.0528319	0.139995	0.0621914	0.0699151
3482	9.326	614.538	Cer 34:0;3O|Cer 18:0;3O/16:0	[M+CH3COO]-		0.589	TRUE	9.23	614.537	C34H69NO4	Cer_NP	IVBULNXGVIHEKN-UHFFFAOYSA-N	O=C(NC(CO)C(O)C(O)CCCCCCCCCCCCCC)CCCCCCCCCCCCCCC	310	TRUE	TRUE	TRUE		FALSE	FALSE	null	null	100	99.9	58.5	80.2	100	375.2	190628_TT1_Hclass_Aging_016_6_12M_SPF_M_Kidney_3_Neg	614.53827:1567 615.54162:1350 616.54498:577	223.2058:48 237.22224:12 239.2433:24 244.26656:36 255.23364:36 266.24457:141 280.26764:24 296.26208:36 298.27533:60 310.26797:24 499.51126:12 518.51825:12 554.49261:12 554.52234:86	0.276063	0.328876	0.217214	0.38929	0.258429	0.273922	0.275109	0.285324	0.273816	0.345981	0.256097	0.247647	0.299697	0.25929	0.281701	0.317011	0.266986	0.306122
3505	7.86	618.476	SL 34:0;2O|SL 17:0;O/17:0;O	[M-H]-	found in higher mz's MsMs_4164	0.5	TRUE	8.14	618.477	C34H69NO6S	SL	DTCSHIYBWVNQJM-UHFFFAOYSA-N	O=C(N(CC(O)CCCCCCCCCCCCCC)CS(=O)(=O)O)C(O)CCCCCCCCCCCCCCC	310	TRUE	TRUE	TRUE		FALSE	FALSE	null	null	100	99	63.9	68.8	100	2254.21	190628_TT1_Hclass_Aging_045_30_12M_SPF_F_Kidney_3_Neg	618.47662:8281 619.47997:6898 620.48333:2453	80.9621:24 333.21188:48 350.23758:584 374.2316:12 392.25107:167 536.38904:12 600.46082:12 618.47711:1381	0.0149785	1.70553	0.456713	0.00439049	4.74698	0.0091715	2.69958	0.00632102	0.0103466	3.5563	0.0100396	2.82186	0.0117419	2.49562	1.3499	2.63927	0.0121467	0.00417819
3510	5.205	619.287	LPI 20:4	[M-H]-		0.929	TRUE	5.06	619.289	C29H49O12P	LPI	BAWAZBRKENFJED-UHFFFAOYSA-N	O=C(OCC(O)COP(=O)(O)OC1C(O)C(O)C(O)C(O)C1O)CCCCCCC=CCC=CCC=CCC=CCC	310	TRUE	TRUE	TRUE		FALSE	FALSE	null	null	100	99.7	90.2	98.6	100	463.99	190628_TT1_Hclass_Aging_026_2_9w_SPF_M_Kidney_2_Neg	619.28894:18116 620.29229:17920 621.29565:4744	78.95841:186 96.96641:4 96.97055:40 150.97189:4 152.99448:1025 163.14616:8 170.99501:4 171.0097:44 177.08997:8 191.188:8 205.1982:37 223.00284:196 241.01183:496 250.1409:3 259.02161:62 259.24304:120 277.14499:3 285.22162:12 302.25943:12 303.23376:1295 304.23416:12 307.12714:12 315.04568:396 333.04453:4 333.05988:68 457.23593:8 617.22778:4 619.29022:1049	9.80444	9.51214	9.51815	11.9284	5.94085	11.0452	10.0522	11.0319	13.1841	16.4938	13.2582	8.18982	10.0308	13.8978	7.5057	11.2508	10.7097	13.8638
3528	5.462	621.303	LPI 20:3	[M-H]-	adduct linked to 4074_[M+Hac-H]-	0.821	TRUE	5.41	621.304	C29H51O12P	LPI	BNXYBNVTWAMAER-UHFFFAOYSA-N	O=C(OCC(O)COP(=O)(O)OC1C(O)C(O)C(O)C(O)C1O)CCCCCCCCCC=CCC=CCC=CCC	310	TRUE	TRUE	TRUE		FALSE	FALSE	null	null	100	100	91.1	98.1	100	54.17	190628_TT1_Hclass_Aging_030_3_9w_SPF_M_Kidney_3_Neg	621.30304:5600 622.30639:5172 623.30975:1278	78.95975:50 96.9679:12 150.97894:6 152.98422:30 152.99638:444 171.0007:6 171.00436:18 222.99887:112 235.05759:5 241.01425:211 259.02188:24 305.24875:606 315.04596:199 321.1384:5 333.06531:35 621.30762:403	0.984694	0.834743	0.861829	2.58193	0.460626	1.00355	0.624823	0.68908	1.2689	2.2329	1.17551	0.464403	0.56108	1.65026	0.308887	1.31224	0.87701	1.04946
3540	9.98	622.538	Cer 36:2;2O|Cer 18:2;2O/18:0	[M+CH3COO]-	adduct linked to 3559_[M+C2H3N+Na-2H]-; adduct linked to 3743_[M+CH3COONa-H]-; similar chromatogram in higher mz_5477; similar chromatogram in higher mz_5664; similar chromatogram in higher mz_5625	0.768	TRUE	9.95	622.542	C36H69NO3	Cer_NS	WNPWDGNHTKGEDS-UHFFFAOYSA-N	O=C(NC(CO)C(O)C=CCCC=CCCCCCCCCC)CCCCCCCCCCCCCCCCC	310	TRUE	TRUE	TRUE		FALSE	FALSE	null	null	100	100	87.8	77.5	100	46.47	190628_TT1_Hclass_Aging_007_28_12M_SPF_F_Kidney_1_Neg	622.53979:1853 623.54314:1163 624.5465:297	235.19206:10 261.22079:24 306.27066:12 308.29785:60 324.29092:24 514.49548:12 530.487:36 532.49951:12 532.50922:24 562.52173:36	0.221141	0.238394	0.192767	0.308798	0.306624	0.248038	0.391234	0.28111	0.202868	0.208109	0.222808	0.424506	0.310694	0.28511	0.318849	0.221726	0.196291	0.186904
3553	11.039	624.555	Cer 36:1;2O|Cer 18:1;2O/18:0	[M+CH3COO]-		0.143	TRUE	10.71	624.557	C36H71NO3	Cer_NS	VODZWWMEJITOND-UHFFFAOYSA-N	O=C(NC(CO)C(O)C=CCCCCCCCCCCCCC)CCCCCCCCCCCCCCCCC	310	TRUE	TRUE	TRUE		FALSE	FALSE	null	null	100	98.8	89.9	81.7	100	168.86	190628_TT1_Hclass_Aging_047_1_9w_SPF_M_Kidney_1_Neg	624.5553:2287 625.55865:1435 626.56201:377	223.08798:12 237.21748:24 263.23669:24 265.25116:24 268.25854:10 282.2702:24 308.28311:24 308.29788:110 311.30417:10 358.57376:10 516.53174:24 534.5321:36 564.5174:12 564.54407:105	0.314133	0.48877	0.470343	0.652929	0.406998	0.328136	0.795558	0.273384	0.526939	0.452164	0.30154	0.533865	0.764153	0.281655	0.890507	0.544604	0.452345	0.347068
3554	10.953	624.557	Cer 36:1;2O|Cer 18:1;2O/18:0	[M+CH3COO]-	adduct linked to 3043_[M-H]-; similar chromatogram in higher mz_7701; similar chromatogram in higher mz_5694	0.786	TRUE	10.71	624.557	C36H71NO3	Cer_NS	VODZWWMEJITOND-UHFFFAOYSA-N	O=C(NC(CO)C(O)C=CCCCCCCCCCCCCC)CCCCCCCCCCCCCCCCC	310	TRUE	TRUE	TRUE		FALSE	FALSE	null	null	100	99.3	93.6	94	100	382.07	190628_TT1_Hclass_Aging_041_46_24M_GF_F_Kidney_2_Neg	624.552:4295 625.55535:2570 626.55871:826	237.21819:60 253.24673:10 263.23969:36 265.24957:24 282.27798:60 283.26208:24 298.2731:10 308.29364:128 324.28403:36 516.51306:24 532.50653:48 534.52612:36 564.5412:197	0.595396	0.452205	0.496305	0.652929	1.02423	0.78345	0.758398	0.800486	0.504583	0.417401	0.644471	0.79225	0.700971	0.633314	0.90227	0.483913	0.467164	0.288017
3734	5.173	643.29	LPI 22:6	[M-H]-		0.929	TRUE	5.18	643.289	C31H49O12P	LPI	CAPHXUZAFHNJAV-UHFFFAOYSA-N	O=C(OCC(O)COP(=O)(O)OC1C(O)C(O)C(O)C(O)C1O)CCC=CCC=CCC=CCC=CCC=CCC=CCC	310	TRUE	TRUE	TRUE		FALSE	FALSE	null	null	100	100	83.9	97.4	100	345.71	190628_TT1_Hclass_Aging_020_7_18M_SPF_M_Kidney_1_Neg	643.28845:5261 644.2918:4265 645.29516:1135	78.95668:33 96.96858:6 121.09856:4 135.1214:4 150.97784:5 152.99527:263 161.13292:2 163.07526:2 167.10545:2 171.00681:11 175.14813:4 177.16917:4 187.14487:1 191.17711:4 203.17743:2 211.70105:1 223.00145:58 229.19717:18 241.01033:115 249.18137:2 250.21703:1 257.1554:2 257.17792:1 259.01999:17 269.10208:2 272.08023:1 283.24176:72 307.21375:1 315.0462:121 322.69226:1 326.18839:2 327.23352:161 333.05…	2.07988	2.91014	1.85789	5.17114	1.07904	1.91329	1.58285	1.75633	4.46316	5.50102	3.72519	1.539	2.12666	4.3058	1.25011	4.01796	2.70908	3.69005
3770	8.881	647.47	PA 32:0|PA 16:0_16:0	[M-H]-		0.179	TRUE	8.66	647.466	C35H69O8P	PA	PORPENFLTBBHSG-UHFFFAOYSA-N	O=C(OCC(OC(=O)CCCCCCCCCCCCCCC)COP(=O)(O)O)CCCCCCCCCCCCCCC	310	TRUE	TRUE	TRUE		FALSE	FALSE	null	null	100	99.3	95.2	89.1	100	25.01	190628_TT1_Hclass_Aging_001_38_9w_GF_F_Kidney_2_Neg	647.47162:541 648.47497:353 649.47833:75	152.99695:10 255.22794:60 391.21158:12 647.45953:12	0.32482	0.374697	0.389379	0.217129	0.552346	0.310481	0.458001	0.405039	0.290823	0.21767	0.239996	0.432293	0.467244	0.234699	0.547909	0.415893	0.489619	0.226443
3817	12.629	652.58	Cer 38:1;2O|Cer 18:1;2O/20:0	[M+CH3COO]-	adduct linked to 3259_[M-H]-	0.25	TRUE	12.05	652.588	C38H75NO3	Cer_NS	XWBWIAOWSABHFI-UHFFFAOYSA-N	O=C(NC(CO)C(O)C=CCCCCCCCCCCCCC)CCCCCCCCCCCCCCCCCCC	410	TRUE	TRUE	TRUE		FALSE	FALSE	null	null	100	95.6	81.5	79.9	100	623.59	190628_TT1_Hclass_Aging_044_34_24M_SPF_F_Kidney_2_Neg	652.59003:2804 653.59338:2167 654.59674:818	223.03249:10 237.22076:36 263.22647:12 268.25742:12 293.29178:36 311.29547:60 336.32587:181 544.56104:12 560.54437:24 562.5498:36 592.53821:12 592.56897:238 593.57721:24	0.269613	0.210506	0.205099	0.249631	0.252358	0.261082	0.594768	0.219304	0.255894	0.575611	0.19357	0.698671	0.520556	0.149828	0.644921	0.48978	0.685077	0.688009
3818	12.449	652.584	Cer 38:1;2O|Cer 18:1;2O/20:0	[M+CH3COO]-	adduct linked to 3260_[M-H]-; similar chromatogram in higher mz_5091	0.161	TRUE	12.05	652.588	C38H75NO3	Cer_NS	XWBWIAOWSABHFI-UHFFFAOYSA-N	O=C(NC(CO)C(O)C=CCCCCCCCCCCCCC)CCCCCCCCCCCCCCCCCCC	310	TRUE	TRUE	TRUE		FALSE	FALSE	null	null	100	97.9	92.1	88.8	100	689.37	190628_TT1_Hclass_Aging_008_43_18M_GF_F_Kidney_1_Neg	652.58417:4123 653.58752:2752 654.59088:927	91.0395:10 237.21753:36 263.23904:48 281.25964:10 293.29068:36 310.31207:48 336.31186:12 336.32986:144 364.35599:12 544.54352:24 560.53326:24 562.55536:36 574.5589:12 592.57465:236	0.617032	0.534837	0.458227	0.656901	0.613817	0.681952	0.469354	0.723932	0.517331	0.359225	0.844382	0.580326	0.587839	0.63386	0.549576	0.550269	0.317273	0.214202
3819	12.523	652.585	Cer 38:1;2O|Cer 18:1;2O/20:0	[M+CH3COO]-	similar chromatogram in higher mz_5093	0.536	TRUE	12.05	652.588	C38H75NO3	Cer_NS	XWBWIAOWSABHFI-UHFFFAOYSA-N	O=C(NC(CO)C(O)C=CCCCCCCCCCCCCC)CCCCCCCCCCCCCCCCCCC	310	TRUE	TRUE	TRUE		FALSE	FALSE	null	null	100	96.7	90.3	87.9	100	792.9	190628_TT1_Hclass_Aging_015_31_18M_SPF_F_Kidney_1_Neg	652.58679:3651 653.59014:2115 654.5935:718	191.12457:12 249.06595:36 250.16797:24 263.23349:36 293.28952:36 310.3158:24 336.32593:177 352.32007:12 544.52155:12 544.5379:24 560.54413:24 562.56287:60 592.56183:201	0.573345	0.538762	0.443515	0.620732	0.630135	0.726586	0.746574	0.787844	0.49867	0.375779	0.807394	0.694287	0.620642	0.568219	0.753474	0.515877	0.348612	0.284117
3859	12.856	654.605	Cer 38:0;2O|Cer 18:0;2O/20:0	[M+CH3COO]-	adduct linked to 3896_[M+C2H3N+Na-2H]-	0.696	TRUE	12.48	654.604	C38H77NO3	Cer_NDS	ZWAUSWHRQBSECP-UHFFFAOYSA-N	O=C(NC(CO)C(O)CCCCCCCCCCCCCCC)CCCCCCCCCCCCCCCCCCC	310	TRUE	TRUE	TRUE		FALSE	FALSE	null	null	100	98.3	77.3	81.7	100	186.62	190628_TT1_Hclass_Aging_001_38_9w_GF_F_Kidney_2_Neg	654.59973:1256 655.60308:1246 656.60644:323	250.17308:10 265.24866:24 271.37741:10 293.28793:24 308.29022:12 308.29269:24 336.31659:12 336.33719:24 391.24017:10 546.54901:24 562.55127:24 592.58075:12 594.58441:122	0.261292	0.134071	0.145819	0.18001	0.155399	0.329562	0.179676	0.123611	0.117693	0.172163	0.135446	0.267371	0.125992	0.106007	0.270557	0.120574	0.217427	0.150136
3996	8.516	671.464	PA 34:2|PA 16:0_18:2	[M-H]-	similar chromatogram in higher mz_5047; similar chromatogram in higher mz_4657	0.929	TRUE	8.49	671.466	C37H69O8P	PA	YQMUIZXKIKXZHD-UHFFFAOYSA-N	O=C(OCC(OC(=O)CCCCCCCC=CCC=CCCCCC)COP(=O)(O)O)CCCCCCCCCCCCCCC	310	TRUE	TRUE	TRUE		FALSE	FALSE	null	null	100	100	94.3	90.2	100	79.8	190628_TT1_Hclass_Aging_038_47_24M_GF_F_Kidney_3_Neg	671.46436:2510 672.46771:1789 673.47107:599	152.99304:36 255.2207:24 255.22968:116 279.2283:24 279.23297:60 391.2027:12 391.22214:36 409.23242:36 415.23056:12 671.42468:12 671.46832:60	1.16119	0.867242	0.899377	0.818636	1.36121	0.848874	1.02595	1.14962	0.834983	0.823409	0.711929	1.18264	1.42686	0.838851	0.934964	1.14109	0.998684	0.719435
4009	8.908	673.476	PA 34:1|PA 16:0_18:1	[M-H]-	similar chromatogram in higher mz_4025	0.661	TRUE	8.75	673.481	C37H71O8P	PA	OPVZUEPSMJNLOM-UHFFFAOYSA-N	O=C(OCC(OC(=O)CCCCCCCC=CCCCCCCCC)COP(=O)(O)O)CCCCCCCCCCCCCCC	310	TRUE	TRUE	TRUE		FALSE	FALSE	null	null	100	99.7	86.3	83.7	100	36.19	190628_TT1_Hclass_Aging_QC_Neg_04	673.47705:1198 674.4804:809 675.48376:1221	78.96043:10 152.99353:24 255.22353:12 255.23026:36 281.24704:48 391.21167:12 409.22455:12 417.24411:36 673.48157:12	0.57519	0.556002	0.615394	0.413133	0.781146	0.590989	0.734918	0.761244	0.4317	0.40236	0.451215	0.850155	0.746632	0.445815	0.949416	0.737044	0.772279	0.360951
4018	10.631	674.508	PE O-32:1|PE O-16:1_16:0	[M-H]-		0.786	TRUE	10.23	674.513	C37H74NO7P	EtherPE	FDULCEKAOVWBTQ-UHFFFAOYSA-N	O=C(OC(COC=CCCCCCCCCCCCCCC)COP(=O)(O)OCCN)CCCCCCCCCCCCCCC	310	TRUE	TRUE	TRUE		FALSE	FALSE	null	null	100	98.2	88.2	91.1	100	64.74	190628_TT1_Hclass_Aging_006_39_9w_GF_F_Kidney_3_Neg	674.51349:1124 675.51684:1287 676.5202:767	239.24084:10 255.23109:155 436.28989:24 674.50775:36	2.38493	6.85019	2.07339	5.7247	2.19059	2.39765	2.73695	1.29208	4.65268	5.3602	5.35691	1.94338	2.25516	5.42816	1.84381	5.22586	6.79922	4.82218
4019	10.716	674.51	PE O-32:1|PE O-16:1_16:0	[M-H]-		0.071	TRUE	10.23	674.513	C37H74NO7P	EtherPE	FDULCEKAOVWBTQ-UHFFFAOYSA-N	O=C(OC(COC=CCCCCCCCCCCCCCC)COP(=O)(O)OCCN)CCCCCCCCCCCCCCC	310	TRUE	TRUE	TRUE		FALSE	FALSE	null	null	100	97.2	85.3	91	100	66.79	190628_TT1_Hclass_Aging_017_18_12M_GF_M_Kidney_3_Neg	674.50885:1654 675.5122:2420 676.51556:1221	255.23042:156 418.26825:12 436.27966:24 674.50165:12 674.50525:24	1.0149	3.17346	0.921758	5.7247	0.799543	0.863921	2.89234	0.637468	2.1391	5.3602	2.10248	1.8892	2.16842	2.03861	1.98937	5.49334	6.9591	4.82218
4022	11.084	674.521	PE O-32:1|PE O-16:1_16:0	[M-H]-	ion correlated with 3894; similar chromatogram in higher mz_4315; similar chromatogram in higher mz_8036	0.768	TRUE	10.23	674.513	C37H74NO7P	EtherPE	FDULCEKAOVWBTQ-UHFFFAOYSA-N	O=C(OC(COC=CCCCCCCCCCCCCCC)COP(=O)(O)OCCN)CCCCCCCCCCCCCCC	410	TRUE	TRUE	TRUE		FALSE	FALSE	null	null	100	90.8	93.8	48.7	100	143.91	190628_TT1_Hclass_Aging_021_5_12M_SPF_M_Kidney_2_Neg	674.51575:2374 675.5191:7105 676.52246:3270	255.22559:12 255.23456:48 436.28534:12	8.68823	7.3791	5.76269	5.57731	2.97306	5.91306	3.98762	15.8603	10.1944	9.14494	16.0798	2.47104	8.0074	7.6082	2.70453	5.96919	4.53982	4.04468
4025	8.883	675.5	PEtOH 32:0|PEtOH 16:0_16:0	[M-H]-	similar chromatogram in higher mz_7579	0.482	TRUE	9.19	675.497	C37H73O8P	PEtOH	UYHAERNXVVKSCT-UHFFFAOYSA-N	O=C(OCC(OC(=O)CCCCCCCCCCCCCCC)COP(=O)(O)OCC)CCCCCCCCCCCCCCC	310	TRUE	TRUE	TRUE		FALSE	FALSE	null	null	100	98.7	86.3	86	100	83.01	190628_TT1_Hclass_Aging_005_33_18M_SPF_F_Kidney_3_Neg	675.50043:3881 676.50378:3106 677.50714:989	181.02255:12 181.02821:24 255.23428:745 437.25354:12 437.26236:48 675.45825:12 675.49835:63	0.941439	0.103948	0.218989	0.651388	1.95589	0.489191	0.107004	0.768138	1.75582	0.292975	0.76718	0.0883825	1.51361	0.375068	0.384542	0.106586	0.0923678	0.154253
4051	12.737	678.604	Cer 40:2;2O|Cer 18:2;2O/22:0	[M+CH3COO]-	adduct linked to 3508_[M-H]-; similar chromatogram in higher mz_5807	0.929	TRUE	12.44	678.604	C40H77NO3	Cer_NS	AWTNSRHUZXWBCO-UHFFFAOYSA-N	O=C(NC(CO)C(O)C=CCCC=CCCCCCCCCC)CCCCCCCCCCCCCCCCCCCCC	310	TRUE	TRUE	TRUE		FALSE	FALSE	null	null	100	99.2	92	93.8	100	4998.59	190628_TT1_Hclass_Aging_036_21_18M_GF_M_Kidney_5_Neg	678.60333:8142 679.60668:4960 680.61004:2469	235.20258:60 261.20691:12 261.22281:48 302.63632:10 321.32275:63 338.34:60 339.32428:72 362.34912:12 364.35553:183 380.34903:48 570.56195:48 586.54578:48 588.56989:75 618.57874:425	3.57987	4.03824	2.40083	5.13646	2.96985	2.91552	4.4349	3.63968	2.57797	3.86563	2.82412	3.52294	3.5002	3.32495	2.95487	3.62449	2.99976	2.86986
4069	13.066	680.62	Cer 40:1;2O|Cer 18:1;2O/22:0	[M+CH3COO]-	adduct linked to 3524_[M-H]-	0.929	TRUE	13.02	680.62	C40H79NO3	Cer_NS	KEPQASGDXIEOIL-UHFFFAOYSA-N	O=C(NC(CO)C(O)C=CCCCCCCCCCCCCC)CCCCCCCCCCCCCCCCCCCCC	310	TRUE	TRUE	TRUE		FALSE	FALSE	null	null	100	100	89.3	90.3	100	23134.8	190628_TT1_Hclass_Aging_044_34_24M_SPF_F_Kidney_2_Neg	680.62012:80731 681.62347:54534 682.62683:16882	235.20387:12 237.22066:500 250.24313:12 263.23547:338 264.73816:10 266.24515:36 268.26416:60 298.2662:12 298.27106:24 321.29901:48 321.31912:405 337.34055:60 338.33884:370 339.32053:301 363.16849:24 364.35699:1511 365.3569:24 380.34775:226 392.37506:12 392.38895:48 572.58337:196 588.54761:12 588.56464:235 590.58197:425 602.58307:24 618.57678:24 620.59943:3608 621.59979:71	22.3078	22.0461	15.5903	25.8104	24.5364	19.1968	24.691	20.8774	21.4484	30.1434	19.1196	23.2889	18.8006	19.7178	25.0562	22.8351	23.0915	20.5288
4111	13.207	684.455	CL 66:5|CL 14:0_16:1_18:2_18:2	[M-2H]2-	similar chromatogram in higher mz_4364; similar chromatogram in higher mz_4506; similar chromatogram in higher mz_4929	0.411	TRUE	13.04	684.455	C75H136O17P2	CL	GUXIFTUXHLPDKX-UHFFFAOYSA-N	O=C(OCC(OC(=O)CCCCCCCC=CCC=CCCCCC)COP(=O)(O)OCC(O)COP(=O)(O)OCC(OC(=O)CCCCCCCCCCCCC)COC(=O)CCCCCCCC=CCCCCCC)CCCCCCCC=CCC=CCCCCC	310	TRUE	TRUE	TRUE		FALSE	FALSE	null	null	100	99.7	85.3	53.4	100	79.59	190628_TT1_Hclass_Aging_QC_Neg_01	684.45319:643 685.45654:616 686.4599:174	227.19962:48 251.20332:12 253.22044:163 279.23102:135 389.21591:12 576.59552:10	0.189537	0.32062	0.144895	0.229939	0.112143	0.173179	0.300979	0.21147	0.267769	0.292329	0.336366	0.196665	0.209553	0.252501	0.183786	0.251097	0.295549	0.33109
4119	13.307	685.453	CL 66:4|CL 16:0_16:1_16:1_18:2	[M-2H]2-		0.286	TRUE	13.19	685.463	C75H138O17P2	CL	WHWZUOQGDAAXOI-UHFFFAOYSA-N	O=C(OCC(OC(=O)CCCCCCCC=CCCCCCC)COP(=O)(O)OCC(O)COP(=O)(O)OCC(OC(=O)CCCCCCCCCCCCCCC)COC(=O)CCCCCCCC=CCCCCCC)CCCCCCCC=CCC=CCCCCC	310	TRUE	TRUE	TRUE		FALSE	FALSE	null	null	100	99.8	62.8	53.6	100	89.1	190628_TT1_Hclass_Aging_038_47_24M_GF_F_Kidney_3_Neg	685.4621:572 686.46545:371 687.46881:0	152.9888:12 160.38959:10 253.20999:24 255.22839:12 279.22455:12 281.24268:12 283.26099:10	0.127714	0.272726	0.0874439	0.136195	0.0823104	0.102351	0.238362	0.113534	0.292112	0.326579	0.301734	0.177155	0.131254	0.219238	0.128564	0.207988	0.251867	0.284573
4131	13.417	686.469	CL 66:3|CL 16:0_16:1_16:1_18:1	[M-2H]2-		0.054	TRUE	13.32	686.471	C75H140O17P2	CL	GXKQMWHMHISQFO-UHFFFAOYSA-N	O=C(OCC(OC(=O)CCCCCCCC=CCCCCCC)COP(=O)(O)OCC(O)COP(=O)(O)OCC(OC(=O)CCCCCCCCCCCCCCC)COC(=O)CCCCCCCC=CCCCCCC)CCCCCCCC=CCCCCCCCC	310	TRUE	TRUE	TRUE		FALSE	FALSE	null	null	100	99.9	68.4	59.3	100	55.16	190628_TT1_Hclass_Aging_QC_Neg_03	686.46857:544 687.47192:338 688.47528:52	152.9951:24 253.1981:12 255.2187:12 255.22543:36 279.23083:36 281.25137:36 283.95276:10 391.21667:12	0.125274	0.242571	0.101384	0.212694	0.115019	0.139711	0.195783	0.109544	0.206101	0.214182	0.212567	0.134232	0.113098	0.182194	0.127269	0.177768	0.219803	0.267608
4139	13.572	687.475	CL 66:2|CL 16:0_16:0_16:0_18:2	[M-2H]2-	similar chromatogram in higher mz_4267; similar chromatogram in higher mz_4642	0.536	TRUE	13.55	687.479	C75H142O17P2	CL	YGTROZKINQENJN-UHFFFAOYSA-N	O=C(OCC(OC(=O)CCCCCCCCCCCCCCC)COP(=O)(O)OCC(O)COP(=O)(O)OCC(OC(=O)CCCCCCCCCCCCCCC)COC(=O)CCCCCCCCCCCCCCC)CCCCCCCC=CCC=CCCCCC	310	TRUE	TRUE	TRUE		FALSE	FALSE	null	null	100	100	69.9	55	100	100.79	190628_TT1_Hclass_Aging_002_4_12M_SPF_M_Kidney_1_Neg	687.48059:701 688.48394:442 689.4873:37	152.99184:36 253.20319:12 255.21483:24 255.23053:143 279.21985:12 279.22452:24 281.24738:60 391.22342:24	0.165947	0.310864	0.169819	0.372767	0.208472	0.196529	0.263827	0.193696	0.306312	0.349252	0.322434	0.24427	0.211066	0.287655	0.190688	0.283984	0.347595	0.284573
4151	13.731	688.486	CL 66:1|CL 16:0_16:0_16:0_18:1	[M-2H]2-		0.214	TRUE	13.68	688.487	C75H144O17P2	CL	NLIVPYVMHKSDIX-UHFFFAOYSA-N	O=C(OCC(OC(=O)CCCCCCCCCCCCCCC)COP(=O)(O)OCC(O)COP(=O)(O)OCC(OC(=O)CCCCCCCCCCCCCCC)COC(=O)CCCCCCCCCCCCCCC)CCCCCCCC=CCCCCCCCC	310	TRUE	TRUE	TRUE		FALSE	FALSE	null	null	100	100	96.7	58.9	100	114.41	190628_TT1_Hclass_Aging_022_44_18M_GF_F_Kidney_2_Neg	688.4837:546 689.48705:314 690.49041:27	153.00015:24 255.21632:12 255.23425:95 281.24417:48 391.23599:24	0.177742	0.30776	0.177422	0.325453	0.159589	0.1868	0.161135	0.127317	0.262901	0.207911	0.247597	0.123696	0.180806	0.241161	0.134604	0.229765	0.220267	0.183878
[truncated: 483 more rows]
[truncated: 38 more columns]

## Sheet: Liver
																															Year (month)	24	19	12	12	24	19	12	19	19	12	19	24	2	12	2	19	19	24
																															Male/Female	Female	Male	Male	Female	Male	Female	Female	Male	Female	Female	Female	Female	Male	Female	Female	Male	Female	Female
																															SPF/germ free	SPF	GF	GF	GF	SPF	SPF	SPF	GF	SPF	SPF	SPF	GF	GF	GF	GF	GF	GF	SPF
[truncated: 883 more rows]
[truncated: 38 more columns]

## Sheet: Lung
																															Year (month)	24	19	12	2	2	2	12	19	24	12	19	2	12	12	2	12	19	19
[truncated: 923 more rows]
[truncated: 38 more columns]

## Sheet: Spleen
																															Year (month)	12	2	24	12	12	24	24	12	19	12	24	2	12	12	2	2	2	24
[truncated: 882 more rows]
[truncated: 38 more columns]

[truncated: 9 more sheets: Muscle, Bone marrow, Plasma, Ear skin, Back skin, Mesentery, Small intestine, Large intestine, Feces]
