# Supplementary material for: A lipidome landscape of aging in mice
Source: Research Square preprint supplement (doi:10.21203/rs.3.rs-2139359/v1), 2022-10-26
Supplement: Supplementary file 4 [file fadb8ed0882da04680c0b0f8.xlsx]

## Sheet: read count
Sample	Check	Min	2M_M_SPF_1	2M_M_SPF_2	2M_M_SPF_3	2M_F_SPF_1	2M_F_SPF_2	2M_F_SPF_3	24M_M_SPF_1	24M_M_SPF_2	24M_M_SPF_3	24M_F_SPF_1	24M_F_SPF_2	24M_F_SPF_3	12M_M_SPF_1	12M_M_SPF_2	12M_M_SPF_3	12M_F_SPF_1	12M_F_SPF_2	12M_F_SPF_3	19M_M_SPF_1	19M_M_SPF_2	19M_M_SPF_3	19M_F_SPF_1	19M_F_SPF_2	19M_F_SPF_3	2M_M_GF_1	2M_M_GF_2	2M_M_GF_3	2M_F_GF_1	2M_F_GF_2	2M_F_GF_3	24M_M_GF_1	24M_M_GF_2	24M_M_GF_3	24M_F_GF_1	24M_F_GF_2	24M_F_GF_3	12M_M_GF_1	12M_M_GF_2	12M_M_GF_3	12M_F_GF_1	12M_F_GF_2	12M_F_GF_3	19M_M_GF_1	19M_M_GF_2	19M_M_GF_3	19M_F_GF_1	19M_F_GF_2
Class	Check	Min	2M_M_SPF	2M_M_SPF	2M_M_SPF	2M_F_SPF	2M_F_SPF	2M_F_SPF	24M_M_SPF	24M_M_SPF	24M_M_SPF	24M_F_SPF	24M_F_SPF	24M_F_SPF	12M_M_SPF	12M_M_SPF	12M_M_SPF	12M_F_SPF	12M_F_SPF	12M_F_SPF	19M_M_SPF	19M_M_SPF	19M_M_SPF	19M_F_SPF	19M_F_SPF	19M_F_SPF	2M_M_GF	2M_M_GF	2M_M_GF	2M_F_GF	2M_F_GF	2M_F_GF	24M_M_GF	24M_M_GF	24M_M_GF	24M_F_GF	24M_F_GF	24M_F_GF	12M_M_GF	12M_M_GF	12M_M_GF	12M_F_GF	12M_F_GF	12M_F_GF	19M_M_GF	19M_M_GF	19M_M_GF	19M_F_GF	19M_F_GF
2020-03-01	16.7917	3	3	5	6	12	11	4	38	13	10	9	14	15	30	19	16	3	5	8	10	27	31	11	39	15	10	12	11	20	27	9	21	18	8	12	23	21	37	22	28	28	6	37	23	25	15	24	9
2020-03-01	72.125	9	61	34	94	27	52	9	59	65	71	86	62	70	89	75	35	67	30	35	40	104	85	111	106	407	18	46	46	49	50	53	122	103	55	67	76	91	65	73	60	66	41	128	91	87	58	75	24
2020-03-02	3017.73	1179	3383	2978	3428	3817	3787	1317	4208	1808	3605	2493	3012	3092	4498	2728	1427	2417	1179	1801	2385	2767	3471	4771	5483	1733	2217	2807	3242	3992	3641	3227	2497	3003	2537	2632	2565	3125	2384	2293	2552	3325	2017	6669	4147	3845	1793	4473	2066
2020-03-02	775.604	352	963	842	981	921	897	352	1087	427	796	501	592	692	1366	804	416	685	380	488	665	717	1097	1220	1155	790	586	782	869	818	813	767	698	899	839	759	633	682	644	777	775	790	493	1444	956	1057	388	938	488
2020-03-03	54.25	18	44	82	73	80	64	27	76	31	58	51	31	53	73	52	37	61	24	38	23	33	45	143	99	54	18	53	53	67	62	55	40	58	38	55	60	62	34	44	40	40	35	127	78	55	38	67	38
2020-03-04	0.229167	0	0	0	0	0	0	0	0	0	0	1	0	2	0	0	0	0	0	0	0	1	0	0	0	2	0	0	0	0	0	0	0	0	1	0	0	0	0	0	0	0	0	2	0	2	0	0	0
2020-03-05	1254.83	497	1920	1233	1754	1189	1459	497	1449	749	1318	712	799	1131	2132	1234	608	1040	554	722	936	1314	1549	1749	1965	1150	1069	1375	1488	1490	1293	1359	1196	1419	1278	1170	1030	1243	1050	1153	1225	1393	845	2475	1635	1848	896	1568	795
2020-03-06	2749.83	892	3803	2732	3837	2529	2822	1134	3514	1664	2366	892	1147	1808	5502	3261	1751	2826	1256	1808	2083	4074	3606	3439	3337	1314	2308	3122	3279	2730	2845	3007	2867	3669	2907	2666	2051	2272	3136	3204	3413	3435	2090	5590	3559	4317	1616	2764	1385
2020-03-07	372.146	139	552	256	417	355	442	139	457	232	356	218	180	294	654	349	166	380	194	235	311	423	349	475	474	379	336	388	412	389	349	423	439	420	401	440	307	383	366	398	410	524	341	791	509	504	222	425	218
2020-03-08	2618.75	1129	3018	2710	3535	3057	3314	1129	3502	1413	2351	1357	1545	2304	4125	2886	1510	2521	1235	1648	2027	2776	3255	3985	3676	1585	2099	2651	2953	2701	2840	2907	2672	3361	2647	3024	2165	2548	2339	2604	2658	3047	1900	5410	3210	3474	1763	3315	1545
2020-03-09	212.812	75	256	344	335	352	355	112	356	103	156	142	184	220	366	206	101	161	75	101	258	171	283	357	356	237	140	200	211	213	207	185	165	209	203	186	170	206	156	153	151	186	118	411	254	264	105	243	133
2020-03-10	17.2292	3	20	23	17	36	22	13	18	10	28	7	18	13	22	21	7	9	9	6	9	5	4	29	40	3	9	12	5	35	25	36	13	15	11	16	16	17	17	21	11	32	14	44	19	18	7	27	8
2020-03-11	0.0208333	0	0	0	0	0	0	0	0	0	0	0	0	0	0	0	0	0	0	0	0	0	0	0	0	0	0	0	0	0	0	0	0	0	0	1	0	0	0	0	0	0	0	0	0	0	0	0	0
2020-09-01	75.0625	21	47	40	42	97	92	33	81	32	75	112	141	65	97	45	27	65	45	52	47	43	68	145	145	541	25	29	33	57	58	42	117	44	49	96	59	75	24	38	44	93	45	140	95	60	21	100	44
2020-09-02	1238.67	557	1549	997	1366	1327	1699	557	1316	615	1244	916	1121	1073	1835	1138	603	1156	651	784	784	1362	1313	1975	1855	2247	808	1067	1220	1431	1362	1506	1152	1169	1031	1312	954	1141	1025	1094	1216	1545	1069	2744	1462	1632	791	1652	860
2020-09-03	10.2292	0	2	6	1	9	21	2	4	5	15	16	11	23	8	8	3	19	7	9	3	0	1	23	14	112	1	3	5	12	4	10	15	4	4	13	3	11	6	5	5	8	8	22	5	6	1	11	5
2020-09-04	412.188	161	412	336	353	620	492	222	505	173	502	771	788	354	540	292	161	524	199	310	334	336	475	901	659	521	171	229	211	491	493	452	263	230	184	559	347	402	259	302	300	445	310	1083	470	487	191	545	342
2020-09-05	27.6667	5	10	19	21	31	27	15	25	10	29	63	44	25	43	17	5	27	33	32	24	17	29	49	48	118	9	17	13	23	26	41	23	24	18	24	20	24	12	18	20	40	34	55	11	25	13	35	19
2020-09-06	173.062	66	166	83	128	192	179	96	150	108	167	172	221	194	213	141	66	226	103	113	110	118	156	359	270	481	89	112	114	163	184	195	173	119	95	227	153	200	125	138	141	279	158	417	182	181	89	276	147
2020-09-07	1013.62	419	1095	639	1108	1029	1696	499	1152	534	992	1078	1064	940	1359	900	419	1122	652	685	587	937	917	1786	1370	1571	570	732	833	1152	1053	1451	887	821	739	1309	973	1086	830	823	954	1258	901	2287	1227	1289	584	1281	806
2020-09-08	433.833	190	368	310	411	528	576	190	468	214	484	439	452	372	621	402	216	581	247	335	368	405	482	829	659	1190	195	244	232	393	467	523	421	399	299	527	371	379	346	350	368	540	348	970	540	532	262	457	290
2020-09-09	797.042	308	680	652	778	1262	1151	363	881	308	783	482	654	916	1002	739	402	890	492	613	673	736	817	1665	1240	2045	374	533	539	810	888	856	706	686	562	966	776	861	519	570	605	962	619	1882	764	860	451	1148	583
2020-09-10	177.458	56	197	125	184	204	283	71	200	56	154	117	162	181	193	160	95	170	88	153	136	192	162	284	237	289	109	130	142	253	250	253	139	166	129	206	170	173	126	137	179	245	164	437	187	231	98	280	107
2020-09-11	1190.33	549	1301	906	1190	1584	1746	609	1388	683	1214	930	937	1146	1658	1073	549	1493	703	843	720	1163	1110	2175	1758	1801	616	818	868	1337	1445	1604	1049	1230	826	1418	1026	1151	1014	1096	1123	1381	953	2724	1352	1514	625	1657	868
2020-09-12	0.0208333	0	0	0	0	0	0	0	0	0	0	0	0	0	0	0	0	0	0	0	0	0	0	0	0	0	0	0	0	0	0	0	0	0	0	0	0	0	0	0	0	1	0	0	0	0	0	0	0
2020-09-14	0.104167	0	0	0	0	0	0	0	2	0	0	0	0	0	0	0	0	0	0	0	0	0	0	0	0	0	0	1	0	0	0	0	0	0	0	0	0	0	0	0	0	2	0	0	0	0	0	0	0
2020-09-15	2889.42	1222	3683	2540	3434	3222	3521	1222	3340	1576	3090	2096	2557	2536	4432	2904	1484	2618	1376	1684	2122	2786	3421	4954	4484	2725	2005	2630	2983	3256	2993	3175	2518	2957	2727	3143	2566	2969	2374	2529	2758	3477	2234	6311	3595	3945	1888	3938	2045
0610005C13Rik	1556.94	428	1774	1774	1884	1822	1971	633	2251	891	1843	1645	1687	1475	2577	1538	811	1387	684	934	1262	1553	1941	2800	2459	428	1078	1389	1698	1792	1653	1658	1308	1687	1388	1271	1217	1495	1286	1232	1428	1563	964	3102	2087	2056	946	2288	1070
0610007P14Rik	357.188	144	470	320	410	325	419	144	420	193	317	274	256	301	568	389	166	325	166	191	306	449	457	490	596	464	269	335	376	395	354	400	316	401	308	346	306	289	293	362	330	396	248	810	471	499	262	470	243
0610009B22Rik	334.062	145	475	364	541	381	409	159	431	159	367	211	302	292	452	293	189	282	145	159	239	294	415	484	450	207	294	360	398	365	355	350	270	339	363	266	267	323	249	308	310	368	231	696	481	528	235	464	295
0610009L18Rik	49.6458	18	84	62	74	65	64	21	70	18	73	55	62	63	63	60	30	46	34	25	44	39	55	86	80	29	23	56	43	55	55	40	29	45	29	38	47	35	33	42	40	44	30	109	66	58	28	88	21
0610009O20Rik	725.875	356	976	832	970	1011	1026	382	987	413	769	529	582	748	1235	723	356	692	374	471	585	675	887	1142	1095	486	466	596	813	842	833	773	659	734	654	752	623	721	559	593	646	730	477	1427	846	874	452	976	456
0610010B08Rik	26.5417	11	28	15	17	27	45	11	34	17	49	56	35	28	40	31	12	18	19	14	14	17	27	59	45	21	17	14	15	26	41	29	16	25	13	16	16	23	17	11	19	34	29	61	28	31	17	49	23
0610010F05Rik	200.229	89	218	124	201	194	241	92	213	89	243	117	108	171	351	186	101	202	106	141	125	186	180	345	249	193	145	177	217	280	233	276	208	197	216	267	159	229	157	214	208	250	170	448	206	328	133	258	156
0610010K14Rik	318.75	133	447	377	373	416	470	166	426	133	364	386	372	315	548	286	146	284	146	189	287	239	381	511	524	280	193	258	293	376	326	344	260	252	283	276	263	267	179	251	259	303	231	607	389	416	201	454	285
0610011F06Rik	1749.1	713	2469	2557	2766	2164	2074	739	2624	1116	1982	1443	1800	1678	3313	1882	992	1406	713	995	1677	1721	2551	2694	2598	813	1499	1908	2450	1671	1668	1576	1413	1759	1797	1495	1324	1424	1192	1292	1497	1431	884	2988	2078	2205	1030	2197	1342
0610012G03Rik	619.75	248	589	769	816	986	898	277	848	287	631	691	717	694	818	574	292	464	248	329	645	504	844	1076	1087	550	481	512	672	714	767	644	484	599	527	522	586	596	413	410	406	608	350	1214	657	803	377	886	438
0610030E20Rik	625.646	266	797	579	747	720	832	266	746	304	745	664	533	506	892	594	284	631	277	399	495	718	695	957	909	611	416	552	589	692	689	716	578	679	551	617	458	519	540	591	604	836	528	1499	720	807	367	860	403
0610031O16Rik	21.875	0	57	62	101	2	6	0	42	23	22	6	0	0	52	41	20	1	1	1	34	43	42	3	2	2	41	45	65	2	1	3	31	32	72	0	4	1	15	44	29	0	0	0	27	46	27	0	1
0610037L13Rik	288.708	118	337	283	365	343	372	144	326	178	320	409	387	268	406	257	129	260	118	194	230	278	365	552	478	323	196	232	285	307	335	328	220	228	216	296	222	236	204	221	226	299	211	576	325	394	159	392	220
0610038B21Rik	13.8125	2	15	15	24	20	22	4	21	10	19	7	15	13	29	11	15	15	2	9	18	14	22	27	16	8	9	10	16	14	20	21	5	16	9	9	16	7	10	8	10	10	6	22	26	17	5	10	6
0610039H22Rik	5.02083	0	6	3	8	6	6	0	5	2	4	33	8	3	15	8	0	1	2	0	4	1	2	5	8	11	4	3	7	6	3	2	6	9	0	2	3	5	3	7	3	3	2	3	9	6	3	8	2
0610039K10Rik	1.02083	0	0	2	0	2	0	0	2	0	2	0	1	3	1	1	0	2	0	3	1	1	3	0	1	4	0	0	0	0	1	0	2	1	1	0	2	1	0	2	1	1	3	0	0	1	0	1	0
0610040B10Rik	11.2708	2	21	9	9	11	23	6	17	5	16	14	10	11	11	5	5	8	5	15	7	9	20	11	11	2	8	6	7	18	15	10	8	7	12	15	11	6	12	6	12	18	4	28	18	19	5	20	9
0610040F04Rik	119.375	27	74	61	97	127	149	50	118	55	213	319	258	135	120	72	27	102	51	55	74	99	126	310	214	78	63	71	71	114	93	132	95	71	88	163	122	131	75	66	90	159	107	322	88	96	82	247	108
0610040J01Rik	550.333	232	442	505	657	805	831	269	727	261	525	299	501	569	748	486	232	527	240	342	433	490	582	1038	868	504	299	385	491	691	679	572	477	594	459	764	619	620	410	415	443	686	380	1266	656	713	330	845	376
0610043K17Rik	33.2708	11	34	18	27	20	44	11	67	30	49	59	46	23	46	37	23	35	21	26	21	21	54	50	65	16	22	25	24	24	26	26	27	52	21	21	23	27	23	26	40	36	33	84	30	37	39	41	25
1010001N08Rik	2.0625	0	0	4	2	0	3	0	3	3	2	2	4	2	3	1	1	4	4	0	4	0	0	2	0	6	2	2	1	1	1	4	2	0	1	1	4	0	2	4	3	1	2	5	4	2	1	4	1
1110001J03Rik	438.042	179	359	522	523	782	615	223	492	179	513	526	592	436	591	331	211	380	205	280	365	287	469	860	802	214	281	323	403	561	616	439	364	407	353	397	348	450	326	279	292	455	250	936	529	524	273	757	329
1110002L01Rik	35.7083	8	49	23	38	35	35	13	40	35	44	16	8	31	54	32	14	49	18	33	23	43	35	45	56	18	31	32	46	33	41	51	35	59	33	49	31	43	32	33	35	53	26	79	30	51	27	37	22
1110004E09Rik	327.125	128	337	329	490	410	524	156	441	135	360	422	390	340	423	314	128	228	153	159	246	247	403	574	552	265	233	277	342	384	362	293	270	276	305	322	273	292	265	259	240	327	211	672	395	435	217	478	294
1110004F10Rik	718.292	278	871	628	941	844	951	278	872	369	826	455	616	688	971	637	353	684	306	447	519	744	862	1172	1152	893	458	696	698	815	733	897	587	677	631	713	590	646	555	617	695	825	630	1586	879	963	462	1056	523
1110006O24Rik	21.6875	6	36	19	33	34	42	10	36	11	24	13	25	21	43	19	8	16	8	16	19	22	26	40	36	16	15	26	21	13	17	19	20	7	18	20	19	21	15	19	9	21	6	31	30	29	16	44	15
1110007C09Rik	268.458	105	238	274	256	470	382	122	294	119	342	346	396	344	446	209	105	224	111	124	245	180	298	429	556	415	153	167	228	269	294	270	231	229	208	245	231	255	155	177	187	271	149	608	336	305	145	388	237
1110008F13Rik	479.938	82	669	641	690	705	564	205	798	228	353	82	105	417	794	509	270	358	157	298	438	501	750	502	640	423	473	551	680	525	552	488	435	590	594	503	394	470	476	482	486	425	237	792	635	716	323	568	253
1110008L16Rik	258.625	110	416	238	322	315	376	110	297	168	229	126	163	240	443	252	157	250	139	169	163	241	365	354	328	184	218	289	271	306	265	281	212	286	255	279	201	260	235	249	258	300	171	532	349	310	168	311	196
1110008P14Rik	233.417	104	261	255	287	348	320	145	258	104	252	267	240	265	364	252	111	248	123	130	232	200	283	450	329	237	147	185	245	205	248	211	159	194	215	297	183	245	125	152	195	220	193	438	243	288	148	316	187
1110012L19Rik	125.125	45	137	166	134	174	172	58	190	53	187	77	117	136	161	103	45	127	54	66	93	78	122	257	242	158	98	97	115	155	130	158	111	129	110	124	112	107	101	103	93	128	79	265	132	167	70	170	82
1110015O18Rik	0	0	0	0	0	0	0	0	0	0	0	0	0	0	0	0	0	0	0	0	0	0	0	0	0	0	0	0	0	0	0	0	0	0	0	0	0	0	0	0	0	0	0	0	0	0	0	0	0
1110017D15Rik	1.625	0	1	4	0	2	2	0	5	0	0	0	4	0	1	0	0	0	0	1	2	3	2	6	1	2	1	0	0	1	4	1	0	2	5	0	4	1	0	1	4	3	0	2	1	2	3	4	0
1110019D14Rik	68.3958	29	64	65	96	49	97	30	65	40	77	54	65	59	113	87	37	59	29	37	45	90	72	131	102	45	54	67	74	74	74	89	60	73	79	82	57	70	53	54	65	81	51	127	78	83	53	93	44
1110020A21Rik	15.3125	2	25	22	9	13	20	6	26	14	19	27	18	9	17	14	4	17	2	10	6	8	22	19	26	6	8	6	13	10	20	11	13	16	20	18	13	11	9	8	14	28	5	47	27	23	12	17	12
1110025L11Rik	0	0	0	0	0	0	0	0	0	0	0	0	0	0	0	0	0	0	0	0	0	0	0	0	0	0	0	0	0	0	0	0	0	0	0	0	0	0	0	0	0	0	0	0	0	0	0	0	0
1110028F11Rik	0.770833	0	0	0	0	1	2	2	0	0	0	4	0	1	0	0	3	0	0	3	1	0	1	2	3	2	0	0	0	0	0	0	0	0	0	0	0	3	1	0	2	0	1	1	0	0	0	4	0
1110028F18Rik	0	0	0	0	0	0	0	0	0	0	0	0	0	0	0	0	0	0	0	0	0	0	0	0	0	0	0	0	0	0	0	0	0	0	0	0	0	0	0	0	0	0	0	0	0	0	0	0	0
1110032A03Rik	451.208	198	600	444	551	496	520	198	546	263	604	447	500	360	788	467	198	428	239	260	324	474	564	758	699	202	322	438	528	495	470	438	389	445	438	383	358	441	368	395	443	511	300	987	580	571	260	636	274
1110032F04Rik	35.1458	4	29	23	51	114	84	26	11	14	23	39	24	32	27	19	4	48	50	33	22	32	33	93	43	13	18	24	21	59	50	69	10	7	20	84	15	28	11	13	23	50	38	76	17	27	7	77	38
1110034G24Rik	60.5833	19	39	52	46	71	69	19	67	27	71	69	79	79	83	52	24	54	29	48	39	61	71	133	132	85	32	43	51	63	66	57	64	65	41	65	51	48	32	34	42	89	59	135	78	70	39	97	38
1110036E04Rik	0.0625	0	0	0	0	0	0	0	0	0	0	0	0	0	0	0	0	0	0	0	0	0	0	0	0	0	0	0	0	0	0	0	0	1	0	0	0	0	0	0	0	1	0	0	0	0	0	0	0
1110037F02Rik	500.125	234	530	486	580	525	562	234	581	321	490	343	379	407	834	509	276	586	282	377	334	632	568	901	770	747	288	413	451	543	537	621	492	567	376	514	369	446	463	522	525	624	471	1125	513	562	264	548	255
1110038B12Rik	105.792	40	145	118	112	114	157	54	164	58	157	114	138	83	146	110	65	86	40	56	86	85	120	146	147	221	63	99	109	139	102	93	69	107	109	78	70	94	87	75	104	113	67	217	113	96	56	179	62
1110038F14Rik	198	92	217	189	214	263	275	92	238	105	212	336	240	201	264	185	103	175	100	119	156	144	205	380	346	308	126	140	164	192	203	179	169	183	162	213	185	171	145	136	150	197	150	406	221	202	115	355	145
1110046J04Rik	4.6875	0	10	2	4	7	10	1	5	4	3	7	6	10	8	2	2	2	2	2	4	1	7	5	6	11	4	4	4	4	2	5	12	2	0	4	5	4	3	4	4	6	4	14	3	4	4	1	5
1110051M20Rik	188.271	82	208	169	204	240	257	88	222	99	218	178	166	208	247	167	82	230	126	126	118	163	192	349	345	185	110	158	183	236	232	207	149	141	146	182	162	198	124	152	170	257	155	460	215	193	102	298	119
1110058D11Rik	0.291667	0	0	0	0	0	0	0	2	0	0	0	7	0	0	0	0	0	0	0	1	0	0	1	0	0	0	0	0	0	0	0	0	0	0	2	0	0	0	0	0	0	0	0	0	0	0	0	1
1110059E24Rik	174.438	76	225	149	212	210	207	78	215	92	191	137	138	186	228	166	76	157	81	95	118	230	187	232	271	193	110	144	163	220	208	203	139	161	178	164	166	172	131	151	175	213	143	375	219	271	121	235	125
1110059G10Rik	146.125	49	239	92	165	182	187	59	173	89	175	134	134	133	193	126	68	130	77	49	102	104	164	241	222	171	90	119	159	171	155	177	138	165	135	132	130	139	94	124	127	169	126	359	175	214	92	203	105
1110065P20Rik	158.792	63	99	208	195	265	270	65	226	74	141	175	197	167	246	171	77	107	63	65	199	128	204	371	282	141	108	112	141	156	168	147	128	128	147	154	122	156	101	106	138	165	96	313	175	174	97	212	117
1190002F15Rik	6.4375	0	10	11	6	8	14	1	12	0	4	6	11	9	12	10	6	5	4	3	2	9	8	6	7	20	3	3	4	8	3	9	8	3	6	0	2	5	5	5	6	4	4	14	8	6	0	6	5
1190002N15Rik	203.75	86	149	131	193	258	303	93	217	86	170	102	118	152	269	200	103	273	139	166	160	190	185	361	277	214	119	139	146	243	245	253	202	199	114	256	183	188	169	219	210	377	230	613	248	278	128	261	139
1190003K10Rik	0.0208333	0	0	0	0	0	0	0	0	0	0	0	0	0	0	0	1	0	0	0	0	0	0	0	0	0	0	0	0	0	0	0	0	0	0	0	0	0	0	0	0	0	0	0	0	0	0	0	0
1190005I06Rik	1.125	0	0	2	0	3	0	0	3	1	3	0	3	0	0	0	2	3	0	0	0	0	3	2	2	4	0	0	1	1	2	0	1	1	0	1	2	0	0	1	2	1	0	2	1	1	1	1	1
1190007I07Rik	123.833	52	129	110	144	145	182	65	140	75	182	108	105	122	164	120	52	102	67	82	100	128	156	218	205	84	80	145	105	152	155	159	88	124	126	116	108	116	88	102	116	154	91	242	141	159	71	180	74
1200014J11Rik	258.896	99	277	237	275	365	446	99	292	115	225	159	138	215	400	300	147	290	138	174	178	216	298	438	436	355	136	206	235	297	296	273	257	270	229	316	242	264	216	225	247	334	195	583	273	323	165	351	144
1300002E11Rik	252.958	88	318	162	269	256	374	88	311	119	330	200	248	215	317	246	126	270	127	199	145	288	275	465	431	201	136	201	198	266	276	339	255	232	186	280	177	199	213	280	228	350	217	654	343	293	159	370	154
1300017J02Rik	1.33333	0	0	0	5	3	0	0	2	0	0	0	3	0	2	0	0	2	0	0	1	0	0	10	0	0	2	2	1	2	0	4	0	2	0	1	4	1	0	0	1	1	0	1	1	0	1	1	2
1500004A13Rik	68.625	22	84	53	52	78	82	28	62	22	123	119	74	43	102	65	32	91	35	56	61	54	80	114	109	57	44	55	56	62	62	83	72	72	47	81	49	65	55	61	65	96	48	137	76	90	47	100	58
1500009C09Rik	0	0	0	0	0	0	0	0	0	0	0	0	0	0	0	0	0	0	0	0	0	0	0	0	0	0	0	0	0	0	0	0	0	0	0	0	0	0	0	0	0	0	0	0	0	0	0	0	0
1500009L16Rik	13.7708	1	24	7	12	14	12	3	7	6	25	26	8	9	9	7	10	12	10	8	10	11	5	34	41	65	6	4	9	11	13	9	13	1	4	21	15	14	17	6	8	19	7	30	14	8	6	24	14
1500011B03Rik	88.2292	26	68	71	105	108	104	31	128	26	97	70	109	80	127	86	49	70	33	68	86	58	81	172	118	102	67	89	85	118	114	98	71	58	68	97	74	62	75	80	83	120	79	225	104	99	41	150	70
1500011K16Rik	291.917	108	338	398	441	405	391	115	413	124	364	366	327	284	447	294	145	186	108	155	247	263	355	496	489	235	214	250	292	313	315	244	198	269	282	231	242	257	227	212	216	281	196	611	390	369	190	409	207
1500012F01Rik	156.479	58	185	126	144	189	179	63	226	65	206	251	233	181	236	134	58	123	68	88	99	111	123	269	282	417	67	129	100	185	154	145	102	127	124	122	130	179	85	91	114	188	108	350	206	193	82	252	116
1500012K07Rik	0.0208333	0	0	0	0	0	0	0	0	0	0	0	0	0	0	0	0	0	0	0	0	0	0	0	0	0	0	0	0	0	0	0	0	0	0	0	0	0	0	0	0	0	0	0	0	0	0	1	0
1500015A07Rik	68.3542	21	93	41	80	86	73	25	75	42	73	83	67	59	97	71	21	72	34	39	50	58	86	103	118	87	54	46	53	89	76	81	54	59	54	70	56	69	54	59	61	80	48	168	77	83	46	93	70
1500015L24Rik	0	0	0	0	0	0	0	0	0	0	0	0	0	0	0	0	0	0	0	0	0	0	0	0	0	0	0	0	0	0	0	0	0	0	0	0	0	0	0	0	0	0	0	0	0	0	0	0	0
1500015O10Rik	10.7083	2	2	5	8	19	12	7	13	3	14	20	23	12	12	9	5	8	4	7	7	11	11	17	9	16	2	11	5	9	8	12	5	7	12	15	15	8	5	11	7	15	16	26	17	8	4	25	6
1500017E21Rik	0.520833	0	0	0	1	0	0	0	2	0	0	0	0	0	1	1	1	0	0	0	1	0	3	0	0	0	0	0	1	0	0	0	0	1	4	0	1	3	1	0	0	0	0	2	0	0	0	2	0
1500026H17Rik	47	9	58	42	78	34	55	17	56	20	59	57	35	44	79	73	24	57	25	26	31	38	59	72	62	9	20	47	58	53	43	51	38	79	40	50	32	41	28	45	54	49	40	108	55	72	31	57	30
1600002D24Rik	0.0625	0	0	0	0	0	0	0	0	0	0	0	0	0	0	0	0	0	0	0	0	0	0	0	2	0	0	0	0	0	0	1	0	0	0	0	0	0	0	0	0	0	0	0	0	0	0	0	0
1600002H07Rik	49.4375	17	55	38	47	72	71	17	69	27	45	67	58	42	88	55	26	49	24	37	42	34	59	70	88	75	27	39	35	66	53	51	46	45	45	52	43	41	37	28	47	60	31	104	56	52	28	71	32
1600002K03Rik	54.8333	24	77	53	43	63	86	33	73	25	60	101	67	32	81	39	24	49	26	37	26	62	81	101	108	94	38	46	40	55	45	44	48	45	51	46	41	58	40	41	38	56	34	117	63	45	41	75	50
1600010M07Rik	2.14583	0	6	2	6	3	2	0	1	4	1	0	3	2	0	0	0	0	1	2	0	0	0	5	6	30	0	1	1	1	0	1	2	1	0	1	6	0	0	0	2	2	0	5	3	1	0	1	0
1600012H06Rik	407.042	179	462	321	464	457	570	179	457	186	457	292	363	341	666	400	202	386	197	264	275	346	423	602	565	453	302	377	410	487	409	473	383	431	347	485	375	383	309	339	380	523	320	993	486	549	277	583	340
1600014C10Rik	700.417	264	895	848	1128	632	771	274	1134	503	651	439	482	587	1406	740	422	497	264	315	656	808	1021	938	927	811	585	789	960	677	717	662	654	854	721	482	554	570	634	555	698	666	398	1169	1086	1084	398	817	343
1600014C23Rik	0.208333	0	0	0	0	0	0	0	0	0	0	0	2	0	0	0	0	1	0	0	0	0	0	0	1	0	0	0	0	0	0	1	0	0	0	0	1	0	0	0	0	0	2	0	0	0	0	1	0
1600014K23Rik	0	0	0	0	0	0	0	0	0	0	0	0	0	0	0	0	0	0	0	0	0	0	0	0	0	0	0	0	0	0	0	0	0	0	0	0	0	0	0	0	0	0	0	0	0	0	0	0	0
1600015I10Rik	0.0625	0	0	0	0	0	0	0	0	0	0	0	0	0	0	0	0	0	0	0	0	0	0	0	1	0	0	0	0	0	0	0	0	0	0	1	0	0	0	0	0	0	0	1	0	0	0	0	0
1600019K03Rik	0	0	0	0	0	0	0	0	0	0	0	0	0	0	0	0	0	0	0	0	0	0	0	0	0	0	0	0	0	0	0	0	0	0	0	0	0	0	0	0	0	0	0	0	0	0	0	0	0
1600020E01Rik	95.6875	33	99	68	104	97	115	35	86	67	136	253	133	109	115	95	33	74	46	55	59	91	127	175	136	132	50	80	77	100	67	103	77	85	86	74	73	90	55	54	94	115	79	214	102	122	54	166	74
1600023N17Rik	5	0	4	4	3	4	5	0	9	3	0	1	13	5	2	4	2	5	4	9	4	2	6	5	6	5	2	5	3	6	1	10	3	8	5	2	5	4	3	9	6	6	5	17	3	5	10	11	5
1600025M17Rik	0	0	0	0	0	0	0	0	0	0	0	0	0	0	0	0	0	0	0	0	0	0	0	0	0	0	0	0	0	0	0	0	0	0	0	0	0	0	0	0	0	0	0	0	0	0	0	0	0
1600027J07Rik	0.0208333	0	0	0	0	0	0	0	0	0	0	0	0	0	0	0	0	0	0	0	0	0	0	0	0	0	0	0	0	0	0	0	0	0	0	0	0	0	0	0	0	0	0	0	0	0	0	0	1
1600029I14Rik	0.166667	0	0	0	0	0	0	0	0	0	0	3	0	0	0	0	0	0	0	0	0	0	0	0	0	2	0	0	0	1	0	0	1	0	0	0	0	1	0	0	0	0	0	0	0	0	0	0	0
1600029O15Rik	7.54167	0	4	8	8	11	15	9	19	7	24	22	17	4	8	7	2	4	2	6	5	4	2	14	13	19	4	1	5	9	4	8	2	12	6	8	6	4	2	2	7	5	5	9	6	11	3	5	0
1700001C02Rik	0.0416667	0	0	1	0	0	0	0	0	0	0	0	0	0	0	0	0	0	0	0	0	0	1	0	0	0	0	0	0	0	0	0	0	0	0	0	0	0	0	0	0	0	0	0	0	0	0	0	0
1700001C19Rik	1.22917	0	3	0	0	1	3	1	0	1	3	0	2	0	1	0	0	0	0	0	0	2	1	4	4	5	3	1	0	1	2	2	1	0	1	1	2	2	2	0	0	0	0	5	2	0	1	1	0
1700001D01Rik	1.3125	0	1	3	0	0	2	0	2	3	2	7	0	3	2	2	0	0	0	0	1	1	1	4	2	0	1	1	1	0	1	1	0	3	5	1	1	0	0	0	0	2	1	2	0	0	2	2	2
1700001F09Rik	0.0416667	0	0	0	0	0	0	0	0	0	0	0	0	0	0	0	0	0	0	0	0	0	0	0	0	2	0	0	0	0	0	0	0	0	0	0	0	0	0	0	0	0	0	0	0	0	0	0	0
1700001G01Rik	0.0833333	0	0	0	0	1	0	0	0	0	0	0	0	0	0	1	0	0	0	0	0	0	0	1	1	0	0	0	0	0	0	0	0	0	0	0	0	0	0	0	0	0	0	0	0	0	0	0	0
1700001G11Rik	2.20833	0	2	2	3	1	0	3	4	1	3	1	2	0	2	1	1	4	2	0	2	5	1	3	1	4	2	0	2	2	2	4	5	0	2	4	2	1	2	2	1	4	1	4	2	2	1	7	3
1700001G17Rik	7	2	7	8	10	7	10	6	6	3	4	13	8	6	5	9	4	6	4	5	4	6	7	16	17	5	2	9	6	2	7	8	7	2	5	3	4	12	4	6	9	6	2	17	6	13	11	9	6
1700001J03Rik	13.1667	1	12	21	5	16	16	3	18	13	10	22	29	16	13	6	1	14	6	7	7	3	19	27	33	6	6	5	7	15	13	17	9	10	6	8	6	17	12	8	11	19	11	45	13	16	16	21	12
1700001J11Rik	9.5625	1	14	9	9	12	14	6	13	8	7	1	4	6	19	6	7	17	5	8	9	11	3	19	10	12	10	7	6	13	13	11	11	10	9	5	7	9	9	10	10	12	5	27	15	13	8	7	1
1700001K19Rik	3.02083	0	1	2	5	3	1	1	4	0	2	0	4	1	8	4	3	6	1	1	3	4	0	2	2	1	3	4	4	1	1	4	2	1	6	1	4	3	5	4	4	6	4	10	3	5	3	5	1
1700001K23Rik	0.625	0	0	0	0	0	0	0	1	1	0	0	0	0	1	2	0	0	0	0	0	1	0	2	3	8	0	0	0	0	0	1	0	1	0	0	0	1	0	0	0	1	2	3	1	0	1	0	0
1700001L05Rik	83.7292	31	125	71	106	66	99	31	133	54	96	70	68	66	115	104	43	92	38	34	43	93	103	122	189	65	38	57	63	81	107	94	71	90	71	79	65	82	63	74	66	125	49	241	119	126	61	86	47
1700001L19Rik	3.25	0	0	2	1	1	3	1	1	1	11	6	4	7	5	3	0	4	1	3	1	0	3	7	8	3	1	3	3	7	4	7	3	2	0	3	0	1	2	3	0	6	2	7	4	6	4	9	1
1700001O22Rik	16.4375	5	15	22	9	16	18	11	20	5	15	15	12	20	27	10	7	15	12	8	13	13	15	28	24	19	12	7	10	18	27	22	21	13	19	22	8	16	13	13	12	37	16	36	20	17	12	27	11
1700001P01Rik	0.9375	0	2	1	0	1	0	0	0	0	1	0	0	1	4	0	3	0	0	0	2	3	1	0	1	1	0	0	1	1	0	1	1	0	0	0	0	1	3	0	1	2	0	6	2	1	0	2	2
1700003C15Rik	0	0	0	0	0	0	0	0	0	0	0	0	0	0	0	0	0	0	0	0	0	0	0	0	0	0	0	0	0	0	0	0	0	0	0	0	0	0	0	0	0	0	0	0	0	0	0	0	0
1700003D09Rik	19.5833	0	19	28	16	31	20	11	38	10	16	0	6	10	23	21	9	38	14	33	9	36	44	44	17	0	12	13	14	7	22	20	17	23	11	31	6	11	16	14	13	44	22	51	21	32	15	20	6
1700003E16Rik	81.625	24	34	88	121	152	118	33	108	24	75	27	60	87	101	81	37	92	47	48	69	70	108	143	130	28	51	81	87	100	106	84	65	90	79	90	80	82	69	55	78	114	66	190	105	100	55	117	49
1700003E24Rik	0	0	0	0	0	0	0	0	0	0	0	0	0	0	0	0	0	0	0	0	0	0	0	0	0	0	0	0	0	0	0	0	0	0	0	0	0	0	0	0	0	0	0	0	0	0	0	0	0
1700003F12Rik	0.770833	0	0	2	0	3	0	0	1	0	0	2	1	1	0	3	1	0	0	1	1	0	0	1	0	0	1	0	0	1	1	0	0	1	1	1	0	3	0	2	1	1	0	4	0	1	0	2	0
1700003G13Rik	0	0	0	0	0	0	0	0	0	0	0	0	0	0	0	0	0	0	0	0	0	0	0	0	0	0	0	0	0	0	0	0	0	0	0	0	0	0	0	0	0	0	0	0	0	0	0	0	0
1700003G18Rik	0.458333	0	0	0	0	0	0	0	0	0	0	0	2	0	1	1	0	0	0	0	0	0	0	2	0	0	0	0	0	0	1	0	0	1	1	1	1	0	0	0	0	0	0	3	3	2	1	1	0
1700003H04Rik	0	0	0	0	0	0	0	0	0	0	0	0	0	0	0	0	0	0	0	0	0	0	0	0	0	0	0	0	0	0	0	0	0	0	0	0	0	0	0	0	0	0	0	0	0	0	0	0	0
1700003I22Rik	0	0	0	0	0	0	0	0	0	0	0	0	0	0	0	0	0	0	0	0	0	0	0	0	0	0	0	0	0	0	0	0	0	0	0	0	0	0	0	0	0	0	0	0	0	0	0	0	0
1700003L19Rik	0.0208333	0	0	0	0	0	0	0	0	0	0	0	0	0	0	0	0	0	0	0	0	0	0	1	0	0	0	0	0	0	0	0	0	0	0	0	0	0	0	0	0	0	0	0	0	0	0	0	0
1700003M02Rik	1.14583	0	0	1	0	3	1	0	0	0	2	0	3	0	0	2	1	1	0	1	2	0	1	7	3	6	0	0	0	0	2	1	1	0	0	2	0	0	0	0	2	1	4	3	1	3	0	0	0
1700003M07Rik	0.145833	0	0	1	1	0	0	0	0	1	0	0	0	0	0	2	0	0	0	0	0	0	0	0	0	0	0	0	0	0	0	0	0	0	0	0	0	1	0	0	0	0	0	1	0	0	0	0	0
1700003P14Rik	1.27083	0	1	4	1	0	1	1	0	2	0	0	1	0	2	0	0	1	0	0	0	0	4	10	3	1	0	0	0	0	1	1	2	2	1	2	1	0	0	4	0	0	1	2	6	2	0	2	0
1700006A11Rik	0	0	0	0	0	0	0	0	0	0	0	0	0	0	0	0	0	0	0	0	0	0	0	0	0	0	0	0	0	0	0	0	0	0	0	0	0	0	0	0	0	0	0	0	0	0	0	0	0
1700006E09Rik	0	0	0	0	0	0	0	0	0	0	0	0	0	0	0	0	0	0	0	0	0	0	0	0	0	0	0	0	0	0	0	0	0	0	0	0	0	0	0	0	0	0	0	0	0	0	0	0	0
1700006F04Rik	0.0625	0	0	0	0	0	0	0	0	0	0	0	1	0	2	0	0	0	0	0	0	0	0	0	0	0	0	0	0	0	0	0	0	0	0	0	0	0	0	0	0	0	0	0	0	0	0	0	0
1700006H21Rik	0	0	0	0	0	0	0	0	0	0	0	0	0	0	0	0	0	0	0	0	0	0	0	0	0	0	0	0	0	0	0	0	0	0	0	0	0	0	0	0	0	0	0	0	0	0	0	0	0
1700007B14Rik	0.291667	0	0	0	0	0	0	0	0	0	0	0	0	0	0	0	0	1	0	0	0	0	0	1	3	0	0	0	0	0	0	0	0	1	0	0	0	0	0	3	0	1	1	0	2	0	0	0	1
1700007F19Rik	1.875	0	1	0	2	1	1	3	0	0	10	8	1	2	0	2	0	3	1	0	1	3	0	6	0	0	1	1	2	1	1	2	2	2	1	1	0	3	3	1	0	3	2	2	3	4	4	2	3
1700007G11Rik	0.625	0	3	0	0	1	0	3	0	0	0	0	0	2	0	0	0	1	0	0	0	0	0	2	0	0	0	0	0	1	2	3	0	0	0	2	0	1	0	1	1	2	0	2	0	0	1	0	1
1700007J10Rik	1.97917	0	1	1	1	3	1	1	0	2	4	5	1	2	3	2	1	3	0	0	1	0	1	7	3	10	0	1	0	3	2	2	1	1	3	7	2	1	1	4	1	2	1	5	1	1	1	1	0
1700007K09Rik	0.354167	0	0	0	0	1	1	2	0	0	0	0	0	1	2	0	0	0	0	1	0	0	0	1	0	0	0	1	1	1	1	0	0	0	0	1	0	0	1	0	0	1	0	0	0	0	1	0	0
1700007K13Rik	4.02083	0	0	3	3	5	6	1	3	1	1	4	6	0	0	2	2	4	4	3	5	0	2	7	5	15	3	4	2	4	9	9	1	3	4	2	7	5	1	5	2	5	4	15	5	9	3	4	2
1700007L15Rik	21.8542	7	20	18	33	18	22	11	29	18	13	12	32	21	31	21	17	19	7	10	27	34	40	15	32	14	26	22	29	25	17	25	28	25	14	15	19	12	25	22	18	17	19	42	25	33	14	41	15
1700007P06Rik	0.5	0	0	1	0	0	0	1	0	0	0	2	0	1	1	1	0	1	1	0	0	0	0	0	0	1	1	0	0	1	0	0	0	2	1	0	0	1	0	1	0	1	0	0	0	0	0	4	1
1700008C04Rik	0.125	0	0	0	0	1	0	0	0	0	0	0	0	1	0	0	0	1	0	0	0	0	0	0	0	0	0	0	0	0	0	0	0	0	0	0	0	0	0	1	0	0	0	0	0	0	1	1	0
1700008J07Rik	68.4375	24	67	65	65	65	95	24	81	26	83	64	79	50	110	52	39	62	43	41	60	54	85	103	95	47	50	60	63	76	85	58	49	69	80	71	52	76	57	57	66	75	62	156	110	106	53	112	43
1700008K24Rik	0	0	0	0	0	0	0	0	0	0	0	0	0	0	0	0	0	0	0	0	0	0	0	0	0	0	0	0	0	0	0	0	0	0	0	0	0	0	0	0	0	0	0	0	0	0	0	0	0
1700008O03Rik	4.125	0	4	6	3	3	7	2	6	1	9	5	10	0	11	6	3	4	1	0	3	1	5	2	2	11	3	3	3	6	5	5	2	2	3	2	1	7	2	5	1	3	2	9	5	5	5	6	4
1700008P02Rik	0	0	0	0	0	0	0	0	0	0	0	0	0	0	0	0	0	0	0	0	0	0	0	0	0	0	0	0	0	0	0	0	0	0	0	0	0	0	0	0	0	0	0	0	0	0	0	0	0
1700009C05Rik	0	0	0	0	0	0	0	0	0	0	0	0	0	0	0	0	0	0	0	0	0	0	0	0	0	0	0	0	0	0	0	0	0	0	0	0	0	0	0	0	0	0	0	0	0	0	0	0	0
1700009J07Rik	7.47917	0	11	13	10	12	12	1	3	7	8	3	9	11	8	9	6	4	4	10	3	4	5	14	11	3	0	10	8	7	12	8	6	10	3	6	12	8	7	6	4	10	5	20	7	6	2	8	6
1700009N14Rik	0	0	0	0	0	0	0	0	0	0	0	0	0	0	0	0	0	0	0	0	0	0	0	0	0	0	0	0	0	0	0	0	0	0	0	0	0	0	0	0	0	0	0	0	0	0	0	0	0
1700010B08Rik	0.0208333	0	0	0	0	0	0	0	0	0	0	0	0	0	0	0	0	0	0	0	0	0	0	0	0	0	0	0	0	0	0	0	0	0	0	0	0	1	0	0	0	0	0	0	0	0	0	0	0
1700010D01Rik	0	0	0	0	0	0	0	0	0	0	0	0	0	0	0	0	0	0	0	0	0	0	0	0	0	0	0	0	0	0	0	0	0	0	0	0	0	0	0	0	0	0	0	0	0	0	0	0	0
1700010I02Rik	0.0833333	0	0	0	0	0	0	0	1	0	0	0	0	0	0	0	0	1	0	0	0	0	0	1	0	0	0	1	0	0	0	0	0	0	0	0	0	0	0	0	0	0	0	0	0	0	0	0	0
1700010I14Rik	17.0208	2	17	7	16	22	20	7	10	5	18	2	24	21	19	19	10	16	4	17	9	17	25	23	25	21	17	15	16	22	24	15	16	20	14	26	15	11	7	12	15	14	16	33	35	31	15	29	14
1700010J16Rik	0	0	0	0	0	0	0	0	0	0	0	0	0	0	0	0	0	0	0	0	0	0	0	0	0	0	0	0	0	0	0	0	0	0	0	0	0	0	0	0	0	0	0	0	0	0	0	0	0
1700010K23Rik	0	0	0	0	0	0	0	0	0	0	0	0	0	0	0	0	0	0	0	0	0	0	0	0	0	0	0	0	0	0	0	0	0	0	0	0	0	0	0	0	0	0	0	0	0	0	0	0	0
1700011A15Rik	0.416667	0	2	0	0	0	1	0	0	0	0	0	7	0	0	0	0	0	0	0	2	0	0	0	0	0	0	0	0	1	0	0	0	0	0	0	0	0	0	0	0	1	1	0	2	2	0	1	0
1700011B04Rik	0	0	0	0	0	0	0	0	0	0	0	0	0	0	0	0	0	0	0	0	0	0	0	0	0	0	0	0	0	0	0	0	0	0	0	0	0	0	0	0	0	0	0	0	0	0	0	0	0
1700011C11Rik	0.104167	0	0	0	0	0	0	0	0	0	0	0	0	2	0	0	0	0	0	0	0	0	0	2	0	0	0	0	0	1	0	0	0	0	0	0	0	0	0	0	0	0	0	0	0	0	0	0	0
1700011E24Rik	0.0833333	0	1	0	0	0	0	0	0	0	0	0	0	0	0	0	0	0	0	0	0	1	0	0	0	0	0	0	0	0	0	0	0	0	0	0	0	1	0	0	0	0	0	1	0	0	0	0	0
1700011H14Rik	1364.92	429	1143	774	1064	1659	1956	716	1364	677	1758	1437	1828	1824	1535	1148	429	1546	802	1022	728	1112	1033	2861	2780	1111	582	739	817	1823	1611	1788	1187	1109	979	1867	1600	1772	915	876	1004	1932	1210	3504	1370	1244	702	2435	1029
1700011I03Rik	0.229167	0	0	0	0	0	0	0	0	0	1	0	1	0	3	0	2	0	1	0	0	0	0	0	0	0	0	0	1	0	0	0	0	0	0	1	0	0	0	0	1	0	0	0	0	0	0	0	0
1700011L22Rik	0.416667	0	2	0	5	0	0	0	0	0	0	0	0	0	0	1	1	2	0	0	1	0	0	0	2	0	0	1	0	0	0	0	1	0	0	0	0	0	0	0	0	0	0	2	0	0	1	1	0
1700011M02Rik	0.0625	0	0	0	0	0	0	0	0	0	0	0	0	0	0	0	0	1	0	0	0	0	0	0	0	0	0	0	0	0	0	0	0	0	0	0	0	0	0	0	0	0	0	1	0	0	0	1	0
1700012A03Rik	0	0	0	0	0	0	0	0	0	0	0	0	0	0	0	0	0	0	0	0	0	0	0	0	0	0	0	0	0	0	0	0	0	0	0	0	0	0	0	0	0	0	0	0	0	0	0	0	0
1700012B07Rik	0.0208333	0	0	0	0	0	0	0	0	0	0	0	0	0	0	0	0	0	0	0	0	0	0	0	0	0	0	0	0	0	0	0	0	0	0	0	0	0	0	0	0	0	0	0	0	0	0	0	1
1700012B09Rik	0	0	0	0	0	0	0	0	0	0	0	0	0	0	0	0	0	0	0	0	0	0	0	0	0	0	0	0	0	0	0	0	0	0	0	0	0	0	0	0	0	0	0	0	0	0	0	0	0
1700012C14Rik	0.166667	0	0	0	0	0	0	0	0	0	0	0	0	2	0	0	0	0	0	0	0	0	0	0	0	0	0	0	0	0	0	1	0	0	0	0	1	0	0	0	0	1	0	1	0	1	0	0	1
1700012D01Rik	5.83333	0	10	8	8	6	10	4	6	5	4	6	6	2	8	1	2	1	3	3	4	7	4	8	7	5	5	0	1	11	5	12	4	8	6	7	1	4	7	2	10	6	3	7	7	13	11	9	7
1700012D14Rik	9.08333	1	11	14	13	13	11	6	11	2	9	12	12	4	15	10	4	11	5	5	5	15	11	8	15	1	4	5	6	9	14	9	11	11	9	9	9	7	9	5	8	5	14	21	8	7	8	11	5
1700012D16Rik	0	0	0	0	0	0	0	0	0	0	0	0	0	0	0	0	0	0	0	0	0	0	0	0	0	0	0	0	0	0	0	0	0	0	0	0	0	0	0	0	0	0	0	0	0	0	0	0	0
1700012H19Rik	0	0	0	0	0	0	0	0	0	0	0	0	0	0	0	0	0	0	0	0	0	0	0	0	0	0	0	0	0	0	0	0	0	0	0	0	0	0	0	0	0	0	0	0	0	0	0	0	0
1700012I11Rik	0.0208333	0	0	0	0	0	0	0	0	0	0	0	0	0	0	0	0	0	0	0	0	0	0	0	0	0	1	0	0	0	0	0	0	0	0	0	0	0	0	0	0	0	0	0	0	0	0	0	0
1700012L04Rik	0.270833	0	0	0	1	0	0	0	0	0	0	0	0	1	0	2	0	0	0	0	0	0	0	0	0	1	0	0	0	0	0	0	0	0	1	0	1	0	0	2	0	1	1	1	0	1	0	0	0
1700012P22Rik	0	0	0	0	0	0	0	0	0	0	0	0	0	0	0	0	0	0	0	0	0	0	0	0	0	0	0	0	0	0	0	0	0	0	0	0	0	0	0	0	0	0	0	0	0	0	0	0	0
1700013D24Rik	0	0	0	0	0	0	0	0	0	0	0	0	0	0	0	0	0	0	0	0	0	0	0	0	0	0	0	0	0	0	0	0	0	0	0	0	0	0	0	0	0	0	0	0	0	0	0	0	0
1700013F07Rik	0.354167	0	0	0	1	1	0	0	0	0	0	2	2	0	0	0	0	0	0	1	0	0	0	1	0	1	0	0	0	1	1	1	0	0	0	1	0	1	0	0	0	1	1	1	0	0	0	0	0
1700013G24Rik	0.0208333	0	0	0	0	0	0	0	0	0	0	0	0	0	0	0	1	0	0	0	0	0	0	0	0	0	0	0	0	0	0	0	0	0	0	0	0	0	0	0	0	0	0	0	0	0	0	0	0
1700013H16Rik	0	0	0	0	0	0	0	0	0	0	0	0	0	0	0	0	0	0	0	0	0	0	0	0	0	0	0	0	0	0	0	0	0	0	0	0	0	0	0	0	0	0	0	0	0	0	0	0	0
1700015E13Rik	2.20833	0	0	3	1	2	5	3	2	4	0	5	3	1	0	1	1	1	0	0	1	0	2	3	2	2	1	3	0	4	6	4	2	1	2	4	2	1	4	2	1	7	1	7	1	0	1	6	0
1700015F17Rik	0.229167	0	0	0	0	1	2	0	2	0	2	0	0	0	0	0	0	0	0	0	0	0	0	0	0	0	0	0	0	0	0	0	0	0	0	1	0	0	0	0	0	0	1	2	0	0	0	0	0
1700015G11Rik	0	0	0	0	0	0	0	0	0	0	0	0	0	0	0	0	0	0	0	0	0	0	0	0	0	0	0	0	0	0	0	0	0	0	0	0	0	0	0	0	0	0	0	0	0	0	0	0	0
1700016C15Rik	124.271	38	222	151	172	95	136	52	193	69	268	98	59	90	216	134	65	93	38	43	99	132	161	202	147	316	111	142	169	115	74	84	98	130	182	139	61	79	116	106	110	103	76	141	176	209	104	84	51
1700016D06Rik	0.0625	0	0	0	0	0	0	0	0	0	0	0	0	0	0	0	0	1	0	0	0	0	0	0	0	0	0	0	0	2	0	0	0	0	0	0	0	0	0	0	0	0	0	0	0	0	0	0	0
1700016G22Rik	0.0833333	0	0	0	0	0	0	0	0	0	0	0	0	0	0	0	0	0	0	0	0	0	0	0	0	1	0	0	1	0	0	0	0	0	0	0	0	0	0	0	0	0	0	2	0	0	0	0	0
1700016H13Rik	0.166667	0	0	0	0	2	0	0	3	0	1	0	0	0	0	0	0	0	0	0	0	0	1	0	0	0	0	0	0	0	0	0	0	0	0	0	0	0	0	0	0	0	0	1	0	0	0	0	0
1700016K19Rik	0.520833	0	0	0	0	1	0	0	3	0	2	1	1	0	0	0	0	1	0	2	2	0	1	1	0	0	0	0	0	0	1	1	2	1	0	0	0	0	0	1	0	0	0	1	1	0	0	2	0
1700016L04Rik	0.229167	0	0	0	0	0	1	1	0	0	0	0	0	0	0	1	0	0	0	0	0	1	0	0	0	0	0	0	0	0	0	0	1	0	1	0	1	0	3	0	0	0	0	0	0	0	0	0	1
1700016L21Rik	0	0	0	0	0	0	0	0	0	0	0	0	0	0	0	0	0	0	0	0	0	0	0	0	0	0	0	0	0	0	0	0	0	0	0	0	0	0	0	0	0	0	0	0	0	0	0	0	0
1700016P04Rik	0	0	0	0	0	0	0	0	0	0	0	0	0	0	0	0	0	0	0	0	0	0	0	0	0	0	0	0	0	0	0	0	0	0	0	0	0	0	0	0	0	0	0	0	0	0	0	0	0
1700017B05Rik	279.104	121	360	295	310	380	307	121	337	148	238	203	193	244	517	248	147	235	135	157	300	232	380	409	341	904	162	208	236	310	274	283	294	326	338	216	227	253	225	266	280	214	177	447	306	317	205	340	208
1700017D01Rik	0	0	0	0	0	0	0	0	0	0	0	0	0	0	0	0	0	0	0	0	0	0	0	0	0	0	0	0	0	0	0	0	0	0	0	0	0	0	0	0	0	0	0	0	0	0	0	0	0
1700017G19Rik	0.0416667	0	0	0	0	0	0	0	0	0	0	0	0	1	0	0	0	1	0	0	0	0	0	0	0	0	0	0	0	0	0	0	0	0	0	0	0	0	0	0	0	0	0	0	0	0	0	0	0
1700017J07Rik	0	0	0	0	0	0	0	0	0	0	0	0	0	0	0	0	0	0	0	0	0	0	0	0	0	0	0	0	0	0	0	0	0	0	0	0	0	0	0	0	0	0	0	0	0	0	0	0	0
1700017L05Rik	0	0	0	0	0	0	0	0	0	0	0	0	0	0	0	0	0	0	0	0	0	0	0	0	0	0	0	0	0	0	0	0	0	0	0	0	0	0	0	0	0	0	0	0	0	0	0	0	0
1700017N19Rik	0	0	0	0	0	0	0	0	0	0	0	0	0	0	0	0	0	0	0	0	0	0	0	0	0	0	0	0	0	0	0	0	0	0	0	0	0	0	0	0	0	0	0	0	0	0	0	0	0
1700018A04Rik	0.291667	0	0	0	0	0	0	0	0	0	0	0	0	0	0	1	0	0	1	1	0	0	1	1	0	0	0	0	0	0	0	0	0	1	0	2	0	1	0	0	2	2	0	0	0	0	0	0	1
1700018B08Rik	0.0416667	0	0	0	0	0	0	0	0	0	0	0	0	0	0	0	0	0	0	0	0	0	0	0	0	0	0	0	0	0	0	0	0	0	0	2	0	0	0	0	0	0	0	0	0	0	0	0	0
1700018B24Rik	0	0	0	0	0	0	0	0	0	0	0	0	0	0	0	0	0	0	0	0	0	0	0	0	0	0	0	0	0	0	0	0	0	0	0	0	0	0	0	0	0	0	0	0	0	0	0	0	0
1700018C11Rik	0	0	0	0	0	0	0	0	0	0	0	0	0	0	0	0	0	0	0	0	0	0	0	0	0	0	0	0	0	0	0	0	0	0	0	0	0	0	0	0	0	0	0	0	0	0	0	0	0
1700018F24Rik	0	0	0	0	0	0	0	0	0	0	0	0	0	0	0	0	0	0	0	0	0	0	0	0	0	0	0	0	0	0	0	0	0	0	0	0	0	0	0	0	0	0	0	0	0	0	0	0	0
1700018G05Rik	0.208333	0	0	0	0	0	0	0	0	0	0	0	0	0	2	0	0	1	0	0	1	0	0	0	0	0	0	0	0	0	0	0	1	0	0	1	0	0	0	0	1	1	0	2	0	0	0	0	0
1700018L02Rik	23.2917	7	23	34	29	41	39	7	31	13	26	17	24	17	28	30	8	24	9	17	25	15	38	27	26	8	16	19	26	28	29	18	19	24	18	17	13	23	22	17	16	32	20	48	33	37	16	35	16
1700019A02Rik	0.354167	0	0	0	0	2	0	0	0	0	1	0	0	0	1	0	0	1	1	2	0	0	0	0	1	0	0	2	0	0	0	1	0	0	0	0	0	1	0	1	0	0	1	0	0	1	1	0	0
1700019B03Rik	0.520833	0	0	0	0	1	0	5	0	0	0	0	0	0	0	1	0	0	0	0	0	0	3	0	0	0	0	0	1	1	1	2	1	0	0	3	0	0	0	0	0	0	0	1	1	0	0	2	2
1700019B21Rik	0.0416667	0	0	0	0	0	0	0	0	0	0	0	0	0	0	0	0	0	0	0	0	0	0	0	0	0	0	0	0	0	1	0	0	0	0	0	0	0	0	0	0	0	0	0	0	0	0	0	0
1700019C18Rik	0	0	0	0	0	0	0	0	0	0	0	0	0	0	0	0	0	0	0	0	0	0	0	0	0	0	0	0	0	0	0	0	0	0	0	0	0	0	0	0	0	0	0	0	0	0	0	0	0
1700019D03Rik	4.125	0	0	2	4	10	11	1	1	5	3	9	3	3	0	4	2	6	3	6	1	0	4	11	4	16	0	3	1	7	8	8	1	0	1	10	2	3	0	1	0	2	7	18	3	2	1	5	6
1700019E08Rik	0	0	0	0	0	0	0	0	0	0	0	0	0	0	0	0	0	0	0	0	0	0	0	0	0	0	0	0	0	0	0	0	0	0	0	0	0	0	0	0	0	0	0	0	0	0	0	0	0
1700019G17Rik	237.562	94	370	221	246	235	251	95	371	192	222	197	153	135	476	305	151	213	104	94	195	305	371	251	302	163	170	290	287	217	195	214	258	282	259	173	190	217	259	273	288	220	131	472	341	354	181	301	99
1700019G24Rik	0.0208333	0	0	0	0	0	0	0	0	0	0	0	0	0	0	0	0	0	0	0	0	0	0	0	0	0	0	0	0	0	0	1	0	0	0	0	0	0	0	0	0	0	0	0	0	0	0	0	0
1700019L03Rik	8.58333	2	9	7	13	7	11	7	14	5	3	5	6	5	13	6	3	16	4	4	5	7	14	16	16	22	11	7	11	6	5	7	7	9	8	14	9	13	10	6	5	4	2	18	4	5	7	12	5
1700019M22Rik	0	0	0	0	0	0	0	0	0	0	0	0	0	0	0	0	0	0	0	0	0	0	0	0	0	0	0	0	0	0	0	0	0	0	0	0	0	0	0	0	0	0	0	0	0	0	0	0	0
1700019N19Rik	0.0625	0	0	0	0	0	0	0	0	0	0	0	0	0	0	0	0	0	0	0	0	0	0	0	0	0	0	0	0	0	0	0	1	0	0	0	0	0	0	0	0	0	0	0	0	1	1	0	0
1700019O17Rik	0	0	0	0	0	0	0	0	0	0	0	0	0	0	0	0	0	0	0	0	0	0	0	0	0	0	0	0	0	0	0	0	0	0	0	0	0	0	0	0	0	0	0	0	0	0	0	0	0
1700020A23Rik	0.104167	0	0	0	0	0	0	0	0	0	0	0	0	0	0	0	0	0	1	0	0	0	1	0	0	0	0	0	0	2	0	0	0	0	0	0	0	0	0	0	0	0	0	0	1	0	0	0	0
1700020D05Rik	2.52083	0	0	0	4	0	0	2	0	0	0	18	4	0	4	4	3	5	3	0	3	1	4	5	0	1	1	0	3	1	2	3	3	2	1	0	3	0	4	6	0	2	2	11	4	4	0	8	0
1700020D14Rik	0	0	0	0	0	0	0	0	0	0	0	0	0	0	0	0	0	0	0	0	0	0	0	0	0	0	0	0	0	0	0	0	0	0	0	0	0	0	0	0	0	0	0	0	0	0	0	0	0
1700020G17Rik	0	0	0	0	0	0	0	0	0	0	0	0	0	0	0	0	0	0	0	0	0	0	0	0	0	0	0	0	0	0	0	0	0	0	0	0	0	0	0	0	0	0	0	0	0	0	0	0	0
1700020I14Rik	240.208	101	296	185	309	243	328	101	293	127	176	140	164	225	327	223	131	272	124	146	160	295	248	402	282	202	162	232	239	306	274	288	236	230	221	236	193	229	222	257	266	355	195	587	273	337	152	352	154
1700020L24Rik	27.9583	5	14	32	19	35	50	9	44	11	28	38	57	33	26	15	7	23	13	19	19	11	31	65	65	66	9	12	17	34	36	44	15	20	15	32	31	31	19	24	18	33	18	58	32	26	5	38	24
1700020M21Rik	0.0208333	0	0	0	0	0	0	0	0	0	0	0	0	0	0	0	0	0	0	0	0	0	0	0	0	0	0	0	0	0	0	0	0	0	0	0	0	0	0	0	0	0	1	0	0	0	0	0	0
1700020N01Rik	2.70833	0	5	3	0	5	7	1	0	1	6	2	6	3	6	4	1	3	1	3	1	1	0	4	4	0	3	2	2	5	6	10	0	2	0	1	7	1	1	0	2	5	2	4	2	1	0	5	1
1700020N15Rik	0.0208333	0	0	0	0	0	0	0	0	0	0	0	0	0	1	0	0	0	0	0	0	0	0	0	0	0	0	0	0	0	0	0	0	0	0	0	0	0	0	0	0	0	0	0	0	0	0	0	0
1700020N18Rik	0.0833333	0	0	0	0	0	0	0	0	0	0	0	0	0	0	0	0	0	0	0	0	0	0	0	0	0	0	0	0	0	1	0	0	0	0	0	0	1	0	0	0	0	0	2	0	0	0	0	0
1700021F05Rik	329.958	143	471	363	478	342	504	155	316	149	399	466	388	301	498	304	143	318	160	180	245	319	409	542	490	222	270	347	435	351	338	378	272	270	314	270	259	257	234	231	274	321	223	630	442	419	216	472	272
1700021F07Rik	0	0	0	0	0	0	0	0	0	0	0	0	0	0	0	0	0	0	0	0	0	0	0	0	0	0	0	0	0	0	0	0	0	0	0	0	0	0	0	0	0	0	0	0	0	0	0	0	0
1700021K19Rik	591.333	267	644	643	727	778	703	267	704	294	541	446	512	527	1003	605	332	689	320	393	492	546	673	1089	852	857	363	507	504	599	626	585	588	640	480	739	462	462	476	480	533	757	450	1320	596	761	357	736	402
1700021N21Rik	0.75	0	0	1	0	0	0	1	1	0	0	0	2	3	1	0	2	0	1	0	0	5	0	2	0	0	0	0	2	1	0	4	0	0	1	1	0	1	0	0	1	2	0	2	1	0	0	0	1
1700022A21Rik	0	0	0	0	0	0	0	0	0	0	0	0	0	0	0	0	0	0	0	0	0	0	0	0	0	0	0	0	0	0	0	0	0	0	0	0	0	0	0	0	0	0	0	0	0	0	0	0	0
1700022A22Rik	0	0	0	0	0	0	0	0	0	0	0	0	0	0	0	0	0	0	0	0	0	0	0	0	0	0	0	0	0	0	0	0	0	0	0	0	0	0	0	0	0	0	0	0	0	0	0	0	0
1700022E09Rik	0.0208333	0	0	0	0	0	0	0	0	1	0	0	0	0	0	0	0	0	0	0	0	0	0	0	0	0	0	0	0	0	0	0	0	0	0	0	0	0	0	0	0	0	0	0	0	0	0	0	0
1700022H01Rik	0.479167	0	0	0	0	1	0	0	1	0	0	0	3	0	0	0	0	4	0	0	1	0	2	0	0	0	0	0	0	0	0	1	1	0	0	0	0	2	1	0	1	3	0	1	0	0	0	0	1
1700022H16Rik	0	0	0	0	0	0	0	0	0	0	0	0	0	0	0	0	0	0	0	0	0	0	0	0	0	0	0	0	0	0	0	0	0	0	0	0	0	0	0	0	0	0	0	0	0	0	0	0	0
1700022I11Rik	0.145833	0	0	0	0	0	0	0	0	0	0	0	0	0	0	0	0	2	0	1	0	0	0	0	0	0	0	0	1	0	0	0	0	0	0	0	0	0	1	0	0	1	0	1	0	0	0	0	0
1700023C21Rik	0	0	0	0	0	0	0	0	0	0	0	0	0	0	0	0	0	0	0	0	0	0	0	0	0	0	0	0	0	0	0	0	0	0	0	0	0	0	0	0	0	0	0	0	0	0	0	0	0
1700023F02Rik	0.25	0	0	0	0	0	0	0	0	0	0	0	0	0	0	3	0	0	0	0	0	0	0	0	0	0	3	0	6	0	0	0	0	0	0	0	0	0	0	0	0	0	0	0	0	0	0	0	0
1700023F06Rik	1.20833	0	2	0	1	0	1	0	8	0	0	0	1	1	2	0	0	1	0	1	0	6	4	0	1	1	1	0	2	2	0	1	2	2	1	3	1	1	0	0	1	2	0	2	1	3	1	1	0
1700024B18Rik	0	0	0	0	0	0	0	0	0	0	0	0	0	0	0	0	0	0	0	0	0	0	0	0	0	0	0	0	0	0	0	0	0	0	0	0	0	0	0	0	0	0	0	0	0	0	0	0	0
1700024F13Rik	0.75	0	2	0	1	3	0	0	2	0	0	0	1	0	3	2	0	0	0	0	1	5	0	1	0	0	1	2	1	2	0	0	0	0	0	1	1	0	0	1	1	0	0	0	2	3	0	0	0
1700024G13Rik	0	0	0	0	0	0	0	0	0	0	0	0	0	0	0	0	0	0	0	0	0	0	0	0	0	0	0	0	0	0	0	0	0	0	0	0	0	0	0	0	0	0	0	0	0	0	0	0	0
1700024I08Rik	0.0833333	0	4	0	0	0	0	0	0	0	0	0	0	0	0	0	0	0	0	0	0	0	0	0	0	0	0	0	0	0	0	0	0	0	0	0	0	0	0	0	0	0	0	0	0	0	0	0	0
1700024N05Rik	0.0416667	0	0	0	0	0	0	0	0	0	0	0	0	0	0	0	0	0	0	2	0	0	0	0	0	0	0	0	0	0	0	0	0	0	0	0	0	0	0	0	0	0	0	0	0	0	0	0	0
1700024P04Rik	0.0625	0	0	0	0	0	0	0	0	0	0	0	0	0	1	0	0	0	0	0	0	0	1	0	0	0	0	0	0	0	0	0	1	0	0	0	0	0	0	0	0	0	0	0	0	0	0	0	0
1700024P16Rik	23.8542	8	36	27	35	11	16	9	42	12	38	12	19	19	45	15	10	18	10	8	20	27	19	32	16	163	10	28	24	28	20	27	39	10	15	26	12	20	11	8	20	21	11	38	31	26	21	19	9
1700025B11Rik	0.208333	0	0	0	0	0	0	0	0	0	0	0	0	0	0	0	0	0	0	0	0	0	0	5	0	2	0	0	0	0	0	1	0	0	0	2	0	0	0	0	0	0	0	0	0	0	0	0	0
1700025C18Rik	0	0	0	0	0	0	0	0	0	0	0	0	0	0	0	0	0	0	0	0	0	0	0	0	0	0	0	0	0	0	0	0	0	0	0	0	0	0	0	0	0	0	0	0	0	0	0	0	0
1700025F22Rik	0	0	0	0	0	0	0	0	0	0	0	0	0	0	0	0	0	0	0	0	0	0	0	0	0	0	0	0	0	0	0	0	0	0	0	0	0	0	0	0	0	0	0	0	0	0	0	0	0
1700025F24Rik	0.125	0	0	0	0	0	0	2	0	0	0	2	1	0	0	0	0	0	1	0	0	0	0	0	0	0	0	0	0	0	0	0	0	0	0	0	0	0	0	0	0	0	0	0	0	0	0	0	0
1700025G04Rik	95.9792	40	120	61	90	97	140	45	79	40	137	134	114	103	111	65	41	93	75	77	56	90	95	187	141	379	40	55	57	98	85	109	58	65	41	93	72	85	80	68	94	126	76	235	71	129	54	116	74
1700025J12Rik	0	0	0	0	0	0	0	0	0	0	0	0	0	0	0	0	0	0	0	0	0	0	0	0	0	0	0	0	0	0	0	0	0	0	0	0	0	0	0	0	0	0	0	0	0	0	0	0	0
1700025K24Rik	0	0	0	0	0	0	0	0	0	0	0	0	0	0	0	0	0	0	0	0	0	0	0	0	0	0	0	0	0	0	0	0	0	0	0	0	0	0	0	0	0	0	0	0	0	0	0	0	0
1700025M24Rik	0	0	0	0	0	0	0	0	0	0	0	0	0	0	0	0	0	0	0	0	0	0	0	0	0	0	0	0	0	0	0	0	0	0	0	0	0	0	0	0	0	0	0	0	0	0	0	0	0
1700025N23Rik	1	0	0	1	0	2	3	1	0	0	0	1	0	0	0	0	0	3	0	0	1	1	0	2	2	1	1	2	0	3	1	1	0	0	1	1	3	3	1	0	1	2	1	2	0	2	0	4	1
1700026D08Rik	0.0833333	0	0	0	0	1	0	0	0	0	0	0	0	0	0	0	0	0	0	0	0	0	0	0	0	0	0	0	0	0	0	0	0	0	0	0	0	0	1	0	1	0	0	1	0	0	0	0	0
1700026D11Rik	0.0625	0	0	0	0	0	0	0	0	1	1	0	0	0	0	0	0	0	0	0	0	0	0	0	0	0	0	0	0	0	0	0	0	0	0	0	0	0	0	0	0	0	0	0	0	1	0	0	0
1700026F02Rik	0	0	0	0	0	0	0	0	0	0	0	0	0	0	0	0	0	0	0	0	0	0	0	0	0	0	0	0	0	0	0	0	0	0	0	0	0	0	0	0	0	0	0	0	0	0	0	0	0
1700026J14Rik	0.270833	0	0	0	0	0	0	0	0	0	0	0	0	0	0	0	0	0	0	0	0	0	0	0	2	1	1	0	1	0	3	1	1	0	0	1	0	0	0	0	1	0	0	1	0	0	0	0	0
1700026L06Rik	1.1875	0	0	0	0	0	2	0	0	0	0	3	1	2	0	1	1	0	0	1	1	6	4	0	0	13	1	0	0	0	1	1	4	0	0	0	0	0	0	3	5	1	1	3	0	1	0	0	0
1700027A15Rik	0	0	0	0	0	0	0	0	0	0	0	0	0	0	0	0	0	0	0	0	0	0	0	0	0	0	0	0	0	0	0	0	0	0	0	0	0	0	0	0	0	0	0	0	0	0	0	0	0
1700027F06Rik	0.0416667	0	1	0	0	0	0	0	0	0	0	0	0	0	0	0	0	0	0	0	0	0	1	0	0	0	0	0	0	0	0	0	0	0	0	0	0	0	0	0	0	0	0	0	0	0	0	0	0
1700027F09Rik	0.145833	0	1	0	0	1	1	0	0	0	0	0	0	0	0	0	0	1	0	0	0	0	0	0	1	0	0	0	0	0	0	0	0	0	0	0	0	0	0	0	1	0	0	0	1	0	0	0	0
1700027H10Rik	0	0	0	0	0	0	0	0	0	0	0	0	0	0	0	0	0	0	0	0	0	0	0	0	0	0	0	0	0	0	0	0	0	0	0	0	0	0	0	0	0	0	0	0	0	0	0	0	0
1700027I24Rik	0	0	0	0	0	0	0	0	0	0	0	0	0	0	0	0	0	0	0	0	0	0	0	0	0	0	0	0	0	0	0	0	0	0	0	0	0	0	0	0	0	0	0	0	0	0	0	0	0
1700027J07Rik	1.125	0	0	2	0	0	0	1	2	0	0	2	5	1	0	2	0	2	0	0	1	1	0	0	1	4	0	0	0	2	0	3	0	1	0	3	2	1	1	3	0	7	1	3	0	0	0	2	0
1700028B04Rik	0.354167	0	0	0	0	0	0	0	0	0	0	0	1	0	0	0	0	0	0	0	0	2	1	1	0	0	1	0	0	0	1	0	1	0	0	3	1	1	0	0	0	1	0	2	0	0	0	1	0
1700028D13Rik	0	0	0	0	0	0	0	0	0	0	0	0	0	0	0	0	0	0	0	0	0	0	0	0	0	0	0	0	0	0	0	0	0	0	0	0	0	0	0	0	0	0	0	0	0	0	0	0	0
1700028E10Rik	8.85417	0	3	11	24	9	10	0	15	10	13	4	6	8	30	9	2	8	3	5	3	5	11	7	15	5	7	9	11	6	6	20	7	10	8	9	8	6	5	9	9	17	6	21	5	8	7	7	3
1700028I16Rik	0.333333	0	3	0	2	1	0	0	0	0	0	0	0	0	1	0	0	0	0	0	0	0	0	1	1	0	0	0	0	0	0	1	1	0	0	1	0	0	0	0	1	1	1	1	0	0	0	0	0
1700028J19Rik	124.646	6	121	99	119	151	168	68	102	48	115	95	129	132	160	87	36	121	75	113	77	133	117	305	243	6	50	102	89	159	158	152	111	87	116	193	138	173	88	93	85	179	93	335	119	131	80	191	145
1700028K03Rik	18.375	0	15	13	14	13	31	9	8	0	30	20	18	24	32	12	17	16	6	11	8	11	15	23	46	31	9	18	16	23	22	25	31	15	26	17	28	10	14	17	7	19	12	42	28	20	9	31	14
1700028M03Rik	0	0	0	0	0	0	0	0	0	0	0	0	0	0	0	0	0	0	0	0	0	0	0	0	0	0	0	0	0	0	0	0	0	0	0	0	0	0	0	0	0	0	0	0	0	0	0	0	0
1700028P14Rik	0.333333	0	0	0	0	0	0	0	0	0	0	5	0	0	0	0	0	0	1	0	0	0	0	2	0	0	0	0	0	0	1	2	0	1	1	0	0	1	0	0	0	0	1	0	0	0	1	0	0
1700028P15Rik	0	0	0	0	0	0	0	0	0	0	0	0	0	0	0	0	0	0	0	0	0	0	0	0	0	0	0	0	0	0	0	0	0	0	0	0	0	0	0	0	0	0	0	0	0	0	0	0	0
1700029B22Rik	0	0	0	0	0	0	0	0	0	0	0	0	0	0	0	0	0	0	0	0	0	0	0	0	0	0	0	0	0	0	0	0	0	0	0	0	0	0	0	0	0	0	0	0	0	0	0	0	0
1700029F12Rik	0.0208333	0	0	0	0	0	0	0	0	0	0	0	0	0	0	0	0	0	0	0	0	0	0	0	0	0	0	0	0	0	0	0	0	0	0	0	1	0	0	0	0	0	0	0	0	0	0	0	0
1700029H14Rik	0.0625	0	0	0	0	0	0	0	0	0	0	0	0	0	0	0	0	0	0	0	0	0	0	0	0	1	1	0	0	0	1	0	0	0	0	0	0	0	0	0	0	0	0	0	0	0	0	0	0
1700029I15Rik	11.0208	1	18	8	13	16	10	6	14	5	9	30	36	9	5	6	2	11	1	3	11	11	11	27	17	7	7	9	7	18	16	9	10	5	10	9	14	10	4	9	8	13	3	11	9	17	6	21	11
1700029J03Rik	0	0	0	0	0	0	0	0	0	0	0	0	0	0	0	0	0	0	0	0	0	0	0	0	0	0	0	0	0	0	0	0	0	0	0	0	0	0	0	0	0	0	0	0	0	0	0	0	0
1700029J07Rik	134.417	49	129	91	145	138	171	49	144	68	169	333	238	135	211	115	53	158	83	109	69	97	122	199	242	76	72	98	111	172	152	119	109	99	84	125	92	126	97	105	88	182	126	335	126	165	99	248	109
1700029M20Rik	0	0	0	0	0	0	0	0	0	0	0	0	0	0	0	0	0	0	0	0	0	0	0	0	0	0	0	0	0	0	0	0	0	0	0	0	0	0	0	0	0	0	0	0	0	0	0	0	0
1700029N11Rik	5.64583	0	4	1	7	9	6	3	3	1	3	9	9	2	10	5	0	5	4	3	2	11	4	11	6	0	6	4	8	7	4	10	5	7	6	8	4	4	4	7	2	10	3	21	5	6	7	7	4
1700029P11Rik	0.145833	0	0	0	0	0	0	0	0	0	0	0	0	0	0	0	0	0	0	0	1	0	0	0	1	0	0	0	0	0	0	0	1	0	0	0	1	0	0	0	0	0	0	1	0	2	0	0	0
1700030A11Rik	0.104167	0	0	0	0	0	0	0	2	0	0	0	0	0	1	0	0	0	0	0	0	0	0	0	0	0	0	0	0	0	0	1	0	0	0	0	0	0	0	0	0	0	0	0	0	1	0	0	0
1700030C10Rik	32.75	6	29	18	27	53	39	7	41	16	41	28	50	44	41	25	15	36	20	15	38	36	45	46	56	9	6	25	20	26	33	26	37	37	38	49	36	20	25	45	16	50	20	68	57	41	17	60	24
1700030F04Rik	0.729167	0	0	1	1	2	0	1	0	0	1	0	2	1	0	0	1	1	0	1	0	0	3	2	0	0	1	0	0	0	1	1	0	1	0	1	2	1	0	0	0	2	0	2	2	2	1	0	1
1700030F18Rik	0.3125	0	0	0	0	0	0	0	0	1	0	0	0	1	0	0	2	2	0	1	1	0	0	0	2	0	0	0	1	0	1	0	0	0	0	0	0	0	0	0	1	0	0	1	0	0	0	0	0
1700030J22Rik	29.6875	5	38	49	60	26	40	5	41	29	13	10	12	27	58	42	15	32	19	27	18	29	44	66	26	27	19	41	32	34	29	29	29	39	12	36	11	31	12	26	27	34	16	55	38	43	21	24	19
1700030K09Rik	86.5833	30	75	61	79	116	135	30	87	50	99	132	104	85	123	62	32	89	50	72	55	73	99	161	190	99	51	62	70	96	92	92	86	97	58	73	72	93	67	73	71	96	61	205	78	103	55	140	67
1700030L20Rik	0.0208333	0	0	0	0	0	0	0	0	0	0	0	0	0	0	0	0	0	0	0	0	0	0	0	0	0	0	0	0	0	0	0	0	0	0	0	0	0	0	0	0	0	0	0	0	0	0	0	1
1700030M09Rik	0.0416667	0	0	0	0	0	0	0	0	0	0	0	0	0	0	0	0	0	0	0	0	0	0	0	0	0	0	0	0	1	0	0	0	0	0	0	0	0	0	1	0	0	0	0	0	0	0	0	0
1700030N03Rik	0.854167	0	0	0	1	2	0	1	0	0	1	0	2	2	1	0	0	1	0	2	0	0	5	4	0	0	2	0	0	0	1	1	0	0	0	1	2	2	0	0	0	2	0	2	2	2	1	0	1
1700030O20Rik	0.0833333	0	0	0	0	0	0	0	1	0	0	0	0	0	0	0	0	0	0	0	0	0	0	0	0	0	0	0	0	0	0	0	1	0	0	0	0	0	0	0	0	0	0	0	1	1	0	0	0
1700031A10Rik	0	0	0	0	0	0	0	0	0	0	0	0	0	0	0	0	0	0	0	0	0	0	0	0	0	0	0	0	0	0	0	0	0	0	0	0	0	0	0	0	0	0	0	0	0	0	0	0	0
1700031F05Rik	0	0	0	0	0	0	0	0	0	0	0	0	0	0	0	0	0	0	0	0	0	0	0	0	0	0	0	0	0	0	0	0	0	0	0	0	0	0	0	0	0	0	0	0	0	0	0	0	0
1700031M16Rik	0	0	0	0	0	0	0	0	0	0	0	0	0	0	0	0	0	0	0	0	0	0	0	0	0	0	0	0	0	0	0	0	0	0	0	0	0	0	0	0	0	0	0	0	0	0	0	0	0
1700031P21Rik	0	0	0	0	0	0	0	0	0	0	0	0	0	0	0	0	0	0	0	0	0	0	0	0	0	0	0	0	0	0	0	0	0	0	0	0	0	0	0	0	0	0	0	0	0	0	0	0	0
1700034E13Rik	0	0	0	0	0	0	0	0	0	0	0	0	0	0	0	0	0	0	0	0	0	0	0	0	0	0	0	0	0	0	0	0	0	0	0	0	0	0	0	0	0	0	0	0	0	0	0	0	0
1700034G24Rik	0.0625	0	0	0	0	0	0	0	0	0	0	0	0	0	0	0	0	0	0	0	0	0	0	0	0	0	0	2	0	0	0	0	0	0	0	0	0	0	0	0	0	0	0	0	0	1	0	0	0
1700034H15Rik	29.9792	8	33	34	27	23	34	11	25	15	57	59	31	24	64	32	12	47	10	19	8	34	30	51	40	14	13	26	31	40	41	27	16	20	23	33	23	33	27	23	24	24	38	70	29	26	17	50	40
1700034I23Rik	4.02083	0	6	1	5	7	5	0	5	2	1	5	4	9	7	6	1	10	4	0	3	1	4	6	5	7	4	5	2	4	5	6	3	4	3	3	3	2	2	1	2	7	3	8	3	3	2	7	2
1700034J05Rik	0	0	0	0	0	0	0	0	0	0	0	0	0	0	0	0	0	0	0	0	0	0	0	0	0	0	0	0	0	0	0	0	0	0	0	0	0	0	0	0	0	0	0	0	0	0	0	0	0
1700034K08Rik	0	0	0	0	0	0	0	0	0	0	0	0	0	0	0	0	0	0	0	0	0	0	0	0	0	0	0	0	0	0	0	0	0	0	0	0	0	0	0	0	0	0	0	0	0	0	0	0	0
1700034O15Rik	3.64583	0	0	0	1	6	3	6	2	1	6	14	4	7	6	2	2	3	2	1	2	0	6	6	11	0	4	3	3	4	9	7	2	2	4	3	5	4	2	1	1	0	2	8	3	3	1	6	3
1700034P13Rik	16.0625	3	43	22	33	15	15	3	27	8	19	9	7	18	25	18	7	6	6	7	10	19	17	16	34	7	11	21	21	20	11	19	15	19	13	8	21	12	7	14	19	13	7	30	32	18	11	24	4
1700036G14Rik	0.145833	0	1	0	0	1	0	0	0	0	0	0	0	0	0	0	0	2	0	1	0	0	0	0	0	0	0	0	0	0	1	0	0	0	0	0	0	0	0	0	0	0	1	0	0	0	0	0	0
1700037C18Rik	71.2292	30	73	71	93	77	84	43	81	46	73	87	101	70	112	63	30	69	31	39	79	52	95	111	129	50	32	60	68	86	71	72	70	54	72	71	65	70	51	52	79	92	51	136	81	81	35	101	56
1700037H04Rik	228.75	92	196	249	324	298	307	92	264	126	206	185	176	223	403	239	112	211	118	137	260	266	288	390	407	347	185	201	230	214	257	213	225	225	216	215	167	179	162	187	197	225	123	431	258	331	144	282	124
1700039E15Rik	0.104167	0	0	0	0	1	0	0	0	0	1	0	0	0	1	0	0	0	0	0	0	0	0	0	0	0	0	1	0	0	0	0	0	0	0	1	0	0	0	0	0	0	0	0	0	0	0	0	0
1700039E22Rik	8.4375	2	5	5	7	13	8	3	2	6	25	5	3	6	29	7	5	11	8	5	7	8	6	13	4	4	2	7	6	3	13	7	20	5	2	12	7	8	5	15	10	10	6	19	8	15	9	7	10
1700040L02Rik	181.667	37	165	152	209	262	287	102	227	89	207	80	180	223	220	174	84	187	114	151	88	159	218	317	368	37	105	150	131	256	208	217	128	169	135	190	157	187	127	126	161	267	209	473	220	178	117	274	109
1700041A01Rik	0.479167	0	0	0	0	0	0	0	1	0	1	0	0	0	7	0	0	1	0	0	0	0	0	1	0	0	0	0	1	1	2	0	1	0	0	0	2	1	0	0	0	1	0	0	1	1	0	1	0
1700041C23Rik	0.0208333	0	0	0	0	0	0	0	0	0	0	0	0	0	0	0	0	0	0	0	0	0	0	0	0	0	0	0	0	0	0	1	0	0	0	0	0	0	0	0	0	0	0	0	0	0	0	0	0
1700041M19Rik	0	0	0	0	0	0	0	0	0	0	0	0	0	0	0	0	0	0	0	0	0	0	0	0	0	0	0	0	0	0	0	0	0	0	0	0	0	0	0	0	0	0	0	0	0	0	0	0	0
1700042G07Rik	0	0	0	0	0	0	0	0	0	0	0	0	0	0	0	0	0	0	0	0	0	0	0	0	0	0	0	0	0	0	0	0	0	0	0	0	0	0	0	0	0	0	0	0	0	0	0	0	0
1700042G15Rik	0.125	0	0	0	0	0	0	0	0	0	0	0	0	0	1	0	0	1	0	0	0	0	0	1	0	0	0	0	0	0	0	0	0	0	0	2	0	0	0	0	0	0	0	0	0	1	0	0	0
1700042O10Rik	0.875	0	2	1	0	3	2	0	2	1	0	0	0	0	0	2	0	1	0	0	1	0	0	0	0	0	1	0	1	0	2	0	0	3	0	1	2	2	0	0	0	1	1	10	1	0	1	0	0
1700044C05Rik	0	0	0	0	0	0	0	0	0	0	0	0	0	0	0	0	0	0	0	0	0	0	0	0	0	0	0	0	0	0	0	0	0	0	0	0	0	0	0	0	0	0	0	0	0	0	0	0	0
1700044K03Rik	0.145833	0	0	0	0	0	0	0	0	0	0	0	3	0	0	0	0	0	0	0	0	0	0	0	0	0	0	0	0	0	0	0	0	0	0	0	0	1	0	0	0	0	2	0	0	0	0	0	0
1700045H11Rik	0.75	0	0	1	2	0	1	1	0	3	0	1	1	0	0	0	0	3	0	0	0	0	0	3	1	0	0	0	2	0	1	1	0	2	1	0	1	1	2	1	1	1	1	4	0	0	0	0	0
1700046C09Rik	0	0	0	0	0	0	0	0	0	0	0	0	0	0	0	0	0	0	0	0	0	0	0	0	0	0	0	0	0	0	0	0	0	0	0	0	0	0	0	0	0	0	0	0	0	0	0	0	0
1700047A11Rik	0.25	0	0	0	0	0	0	0	0	0	0	2	1	0	0	0	0	0	0	1	0	0	0	0	0	0	0	1	0	0	0	0	2	0	0	0	0	0	0	0	0	0	0	4	0	0	0	1	0
1700047E10Rik	0.520833	0	0	0	0	2	0	0	1	0	1	0	0	0	0	0	0	0	0	1	0	0	0	0	0	0	0	0	0	1	0	0	0	0	1	2	0	2	0	0	2	1	0	0	3	2	2	2	1
1700047G03Rik	0.395833	0	0	1	0	0	0	0	0	0	0	8	0	0	3	0	0	0	0	0	1	0	0	0	0	2	0	0	0	0	1	0	0	1	0	0	1	0	1	0	0	0	0	0	0	0	0	0	0
1700047I17Rik2	0	0	0	0	0	0	0	0	0	0	0	0	0	0	0	0	0	0	0	0	0	0	0	0	0	0	0	0	0	0	0	0	0	0	0	0	0	0	0	0	0	0	0	0	0	0	0	0	0
1700047L14Rik	0	0	0	0	0	0	0	0	0	0	0	0	0	0	0	0	0	0	0	0	0	0	0	0	0	0	0	0	0	0	0	0	0	0	0	0	0	0	0	0	0	0	0	0	0	0	0	0	0
1700047M11Rik	0.3125	0	0	1	1	0	0	0	0	0	0	0	0	0	1	0	0	0	0	0	1	0	0	1	2	0	0	0	0	0	0	1	0	1	0	0	0	0	1	0	0	0	0	2	2	0	0	0	0
1700048M11Rik	5.77083	0	6	5	9	2	15	1	6	3	0	12	5	5	17	5	2	9	4	2	4	9	3	14	9	6	1	6	3	11	6	5	5	3	4	4	9	1	5	6	2	6	7	5	5	5	6	5	6
1700048O20Rik	10.3958	1	8	4	2	18	10	3	2	3	18	33	20	23	11	5	5	14	7	8	3	3	13	13	14	25	2	3	3	10	13	16	4	11	3	6	7	7	1	8	8	11	7	39	7	10	6	26	15
1700049E15Rik	0.25	0	0	0	0	2	1	0	0	0	0	5	0	0	0	0	0	0	0	0	0	0	0	0	3	0	0	0	0	1	0	0	0	0	0	0	0	0	0	0	0	0	0	0	0	0	0	0	0
1700049E22Rik	0	0	0	0	0	0	0	0	0	0	0	0	0	0	0	0	0	0	0	0	0	0	0	0	0	0	0	0	0	0	0	0	0	0	0	0	0	0	0	0	0	0	0	0	0	0	0	0	0
1700049G17Rik	104.75	34	186	64	131	86	137	52	87	55	144	75	89	55	175	97	53	114	67	59	73	134	97	153	111	65	91	117	136	79	93	119	115	106	122	108	71	77	100	104	127	153	100	257	134	160	60	130	76
1700049L16Rik	2.20833	0	2	4	2	3	1	0	0	8	2	0	2	4	5	1	0	0	0	2	1	1	2	0	2	10	0	2	0	0	3	3	2	1	2	7	4	3	3	3	4	1	5	2	2	1	3	2	0
1700051A21Rik	1.0625	0	0	1	3	0	0	0	4	0	4	0	0	0	2	0	0	0	0	0	3	1	1	3	0	1	1	3	1	0	0	1	2	4	2	0	0	0	0	4	2	0	0	0	4	1	1	2	0
1700052I22Rik	0.0208333	0	0	0	0	0	0	0	0	0	0	0	0	0	0	0	0	0	0	0	0	0	0	0	0	0	0	0	0	0	0	0	0	0	0	0	0	0	1	0	0	0	0	0	0	0	0	0	0
1700052K11Rik	75.2917	22	87	63	51	140	142	38	81	32	106	93	80	90	68	65	25	78	41	36	56	31	49	145	165	45	22	57	40	90	104	109	66	67	55	102	67	85	50	58	44	93	57	159	70	83	51	130	95
1700054A03Rik	1.22917	0	2	3	2	0	3	0	0	0	6	0	2	0	2	0	2	1	1	3	0	0	0	9	1	0	0	0	3	1	2	2	1	0	1	0	0	0	1	0	1	1	4	0	0	0	0	4	1
1700054K19Rik	0	0	0	0	0	0	0	0	0	0	0	0	0	0	0	0	0	0	0	0	0	0	0	0	0	0	0	0	0	0	0	0	0	0	0	0	0	0	0	0	0	0	0	0	0	0	0	0	0
1700054M17Rik	0.125	0	0	0	0	0	0	0	0	0	4	2	0	0	0	0	0	0	0	0	0	0	0	0	0	0	0	0	0	0	0	0	0	0	0	0	0	0	0	0	0	0	0	0	0	0	0	0	0
1700055C04Rik	0	0	0	0	0	0	0	0	0	0	0	0	0	0	0	0	0	0	0	0	0	0	0	0	0	0	0	0	0	0	0	0	0	0	0	0	0	0	0	0	0	0	0	0	0	0	0	0	0
1700056E22Rik	3.39583	0	3	2	2	9	4	5	0	0	2	14	6	8	3	1	1	3	1	4	1	0	3	11	6	11	5	1	1	2	2	1	1	2	0	5	0	4	3	0	0	3	7	3	3	6	2	7	0
1700057G04Rik	0.0416667	0	0	0	0	0	0	0	1	0	1	0	0	0	0	0	0	0	0	0	0	0	0	0	0	0	0	0	0	0	0	0	0	0	0	0	0	0	0	0	0	0	0	0	0	0	0	0	0
1700057H15Rik	0	0	0	0	0	0	0	0	0	0	0	0	0	0	0	0	0	0	0	0	0	0	0	0	0	0	0	0	0	0	0	0	0	0	0	0	0	0	0	0	0	0	0	0	0	0	0	0	0
1700057H21Rik	0.375	0	0	0	1	0	1	0	2	0	0	0	0	0	0	0	2	0	0	0	0	0	0	0	1	0	0	2	1	0	0	0	0	0	1	0	0	0	2	0	1	0	0	0	0	2	1	1	0
1700060C16Rik	0.354167	0	0	0	0	0	0	0	0	0	0	0	0	1	0	0	0	1	0	0	0	0	0	6	3	0	0	0	0	0	0	0	0	0	0	2	0	1	0	0	0	1	0	0	0	0	0	0	2
1700060C20Rik	0.333333	0	0	0	0	0	0	0	0	1	1	4	1	0	0	0	1	0	0	0	1	0	1	0	0	0	0	0	1	0	0	1	0	0	0	0	1	0	1	0	1	0	0	0	1	0	0	0	0
1700061F12Rik	0	0	0	0	0	0	0	0	0	0	0	0	0	0	0	0	0	0	0	0	0	0	0	0	0	0	0	0	0	0	0	0	0	0	0	0	0	0	0	0	0	0	0	0	0	0	0	0	0
1700061G19Rik	2.5	0	11	0	4	1	4	3	8	0	0	0	1	0	4	0	1	3	2	2	1	12	2	1	2	1	1	2	2	4	3	3	0	5	2	1	2	3	2	0	1	4	4	6	5	6	0	0	0
1700061I17Rik	0	0	0	0	0	0	0	0	0	0	0	0	0	0	0	0	0	0	0	0	0	0	0	0	0	0	0	0	0	0	0	0	0	0	0	0	0	0	0	0	0	0	0	0	0	0	0	0	0
1700061J23Rik	0	0	0	0	0	0	0	0	0	0	0	0	0	0	0	0	0	0	0	0	0	0	0	0	0	0	0	0	0	0	0	0	0	0	0	0	0	0	0	0	0	0	0	0	0	0	0	0	0
1700063A18Rik	0	0	0	0	0	0	0	0	0	0	0	0	0	0	0	0	0	0	0	0	0	0	0	0	0	0	0	0	0	0	0	0	0	0	0	0	0	0	0	0	0	0	0	0	0	0	0	0	0
1700063D05Rik	0.0833333	0	0	0	0	0	0	1	1	0	0	0	0	0	1	0	0	0	0	0	0	0	0	0	1	0	0	0	0	0	0	0	0	0	0	0	0	0	0	0	0	0	0	0	0	0	0	0	0
1700063O14Rik	0.0208333	0	0	0	0	0	0	0	0	0	0	0	0	0	0	0	0	0	0	0	0	0	0	0	0	0	0	0	0	1	0	0	0	0	0	0	0	0	0	0	0	0	0	0	0	0	0	0	0
1700064J06Rik	0	0	0	0	0	0	0	0	0	0	0	0	0	0	0	0	0	0	0	0	0	0	0	0	0	0	0	0	0	0	0	0	0	0	0	0	0	0	0	0	0	0	0	0	0	0	0	0	0
1700064M15Rik	0.0625	0	0	1	0	0	0	0	0	0	0	0	0	0	0	0	0	0	0	0	0	0	0	0	0	0	0	0	0	0	0	0	0	0	0	0	0	0	0	0	0	1	0	0	0	0	0	0	0
1700065D16Rik	0.520833	0	0	0	7	0	1	0	0	0	0	0	0	0	2	0	0	2	0	0	0	0	0	0	0	0	0	1	0	0	1	0	0	0	1	0	0	0	0	1	1	0	2	1	0	1	0	3	0
1700065I16Rik	0	0	0	0	0	0	0	0	0	0	0	0	0	0	0	0	0	0	0	0	0	0	0	0	0	0	0	0	0	0	0	0	0	0	0	0	0	0	0	0	0	0	0	0	0	0	0	0	0
1700065J11Rik	0	0	0	0	0	0	0	0	0	0	0	0	0	0	0	0	0	0	0	0	0	0	0	0	0	0	0	0	0	0	0	0	0	0	0	0	0	0	0	0	0	0	0	0	0	0	0	0	0
1700065J18Rik	0.0833333	0	0	0	0	0	0	0	0	0	0	0	0	2	0	0	0	0	0	0	0	0	0	0	0	0	0	0	0	0	0	0	0	0	0	1	0	0	0	0	0	0	0	1	0	0	0	0	0
1700065L07Rik	0.479167	0	1	0	0	0	0	0	0	0	6	0	0	1	0	0	0	0	0	0	0	0	0	0	0	2	0	0	1	0	1	1	0	0	0	2	0	0	0	1	0	3	1	1	1	0	0	0	0
1700065O20Rik	0.375	0	1	0	3	0	0	0	1	0	0	0	0	1	0	2	0	0	0	0	2	0	0	0	0	0	0	1	0	0	2	0	1	0	1	0	0	0	1	0	0	0	0	0	0	1	0	0	0
1700066B17Rik	0.0208333	0	0	0	0	0	0	0	0	0	0	0	0	0	0	0	0	0	0	0	0	0	0	0	0	0	0	0	0	0	0	0	0	0	0	1	0	0	0	0	0	0	0	0	0	0	0	0	0
1700066B19Rik	1.16667	0	0	1	0	0	1	0	2	1	2	9	0	2	3	0	0	1	0	2	2	1	0	0	1	7	0	0	1	1	3	1	1	0	0	3	1	0	1	0	0	3	0	0	0	2	0	1	0
1700066J03Rik	0.104167	0	0	0	0	0	1	0	0	0	0	0	0	0	0	0	0	0	0	0	0	0	0	0	0	0	1	0	0	0	0	0	0	0	0	0	0	0	0	0	0	1	0	2	0	0	0	0	0
1700066M21Rik	117.938	47	190	89	174	116	158	54	123	47	88	88	78	118	157	123	55	113	57	72	64	125	113	196	172	98	77	131	145	165	136	147	115	131	117	121	112	114	109	100	103	171	93	263	150	134	70	145	76
1700066N21Rik	0	0	0	0	0	0	0	0	0	0	0	0	0	0	0	0	0	0	0	0	0	0	0	0	0	0	0	0	0	0	0	0	0	0	0	0	0	0	0	0	0	0	0	0	0	0	0	0	0
1700066O22Rik	0.0416667	0	0	0	0	0	0	0	0	0	0	0	0	0	0	0	0	1	0	0	0	0	0	0	0	0	0	0	0	0	0	0	0	0	0	0	0	0	0	0	0	0	0	0	0	1	0	0	0
1700067G17Rik	0.4375	0	2	0	0	0	0	0	0	0	0	0	2	0	4	0	0	0	0	1	0	1	1	0	0	0	0	0	0	0	1	0	2	1	0	0	0	1	0	1	1	0	0	1	2	0	0	0	0
1700067K01Rik	30.1458	10	38	23	19	45	29	15	51	11	42	45	20	25	43	38	17	26	11	22	29	19	17	59	53	27	19	28	19	49	38	29	18	15	30	29	31	37	27	15	24	46	10	60	41	28	22	59	25
1700067P10Rik	0	0	0	0	0	0	0	0	0	0	0	0	0	0	0	0	0	0	0	0	0	0	0	0	0	0	0	0	0	0	0	0	0	0	0	0	0	0	0	0	0	0	0	0	0	0	0	0	0
1700069L16Rik	0.0416667	0	0	0	0	0	0	0	0	0	0	1	0	0	1	0	0	0	0	0	0	0	0	0	0	0	0	0	0	0	0	0	0	0	0	0	0	0	0	0	0	0	0	0	0	0	0	0	0
1700069P05Rik	0	0	0	0	0	0	0	0	0	0	0	0	0	0	0	0	0	0	0	0	0	0	0	0	0	0	0	0	0	0	0	0	0	0	0	0	0	0	0	0	0	0	0	0	0	0	0	0	0
1700071K01Rik	1.1875	0	0	0	0	5	2	0	3	0	5	0	0	0	0	0	1	0	1	1	2	2	0	1	2	1	0	0	1	2	2	0	1	1	2	0	1	0	1	0	2	0	0	4	3	5	1	1	1
1700071M16Rik	1.85417	0	4	0	2	0	0	0	0	0	8	0	0	1	0	2	1	5	1	3	4	3	0	5	0	5	0	0	0	1	3	1	4	1	2	0	0	1	2	6	2	2	1	15	0	1	0	2	1
1700072B07Rik	0	0	0	0	0	0	0	0	0	0	0	0	0	0	0	0	0	0	0	0	0	0	0	0	0	0	0	0	0	0	0	0	0	0	0	0	0	0	0	0	0	0	0	0	0	0	0	0	0
1700072I22Rik	0	0	0	0	0	0	0	0	0	0	0	0	0	0	0	0	0	0	0	0	0	0	0	0	0	0	0	0	0	0	0	0	0	0	0	0	0	0	0	0	0	0	0	0	0	0	0	0	0
1700072O05Rik	0	0	0	0	0	0	0	0	0	0	0	0	0	0	0	0	0	0	0	0	0	0	0	0	0	0	0	0	0	0	0	0	0	0	0	0	0	0	0	0	0	0	0	0	0	0	0	0	0
1700073E17Rik	0.916667	0	0	0	0	0	2	0	2	0	0	0	0	1	0	0	1	0	1	1	0	0	3	1	0	11	1	1	0	4	2	0	1	0	0	2	0	0	0	1	1	2	0	1	0	1	0	3	0
1700074H08Rik	0.104167	0	0	0	0	0	1	0	0	0	0	0	0	0	0	0	0	0	0	0	0	0	0	0	0	0	0	0	0	0	0	0	0	0	1	0	0	0	0	0	0	0	0	3	0	0	0	0	0
1700074P13Rik	0	0	0	0	0	0	0	0	0	0	0	0	0	0	0	0	0	0	0	0	0	0	0	0	0	0	0	0	0	0	0	0	0	0	0	0	0	0	0	0	0	0	0	0	0	0	0	0	0
1700080E11Rik	0	0	0	0	0	0	0	0	0	0	0	0	0	0	0	0	0	0	0	0	0	0	0	0	0	0	0	0	0	0	0	0	0	0	0	0	0	0	0	0	0	0	0	0	0	0	0	0	0
1700080N15Rik	0	0	0	0	0	0	0	0	0	0	0	0	0	0	0	0	0	0	0	0	0	0	0	0	0	0	0	0	0	0	0	0	0	0	0	0	0	0	0	0	0	0	0	0	0	0	0	0	0
1700080O16Rik	0	0	0	0	0	0	0	0	0	0	0	0	0	0	0	0	0	0	0	0	0	0	0	0	0	0	0	0	0	0	0	0	0	0	0	0	0	0	0	0	0	0	0	0	0	0	0	0	0
1700081H04Rik	0	0	0	0	0	0	0	0	0	0	0	0	0	0	0	0	0	0	0	0	0	0	0	0	0	0	0	0	0	0	0	0	0	0	0	0	0	0	0	0	0	0	0	0	0	0	0	0	0
1700084C01Rik	3.66667	0	0	0	3	1	1	0	9	1	14	15	4	3	4	5	3	1	1	2	2	8	3	3	11	2	1	2	1	5	0	1	4	4	3	1	5	8	5	5	4	2	1	3	9	3	5	2	3
1700084D21Rik	0.125	0	0	0	0	0	0	0	0	0	2	0	0	0	0	0	0	0	0	0	0	2	0	0	0	0	0	0	0	0	0	0	0	0	0	0	0	0	0	0	0	0	0	0	0	2	0	0	0
1700084E18Rik	5.16667	0	6	5	14	5	5	0	4	7	9	3	12	2	11	4	3	7	2	0	4	9	10	14	4	6	2	2	9	5	5	3	3	7	1	1	4	6	7	4	7	2	2	6	2	13	1	5	4
1700084F23Rik	0.0416667	0	0	0	0	0	0	0	0	0	0	0	0	0	0	0	0	0	0	0	0	0	0	0	0	0	1	0	0	0	0	0	0	0	0	0	0	0	0	0	0	1	0	0	0	0	0	0	0
1700084J12Rik	24.1875	5	41	22	34	40	25	13	28	18	27	5	22	25	27	22	12	23	10	21	9	23	33	47	38	16	19	27	25	19	24	33	19	20	21	20	16	20	26	23	17	28	18	47	31	46	10	33	25
1700084M14Rik	0	0	0	0	0	0	0	0	0	0	0	0	0	0	0	0	0	0	0	0	0	0	0	0	0	0	0	0	0	0	0	0	0	0	0	0	0	0	0	0	0	0	0	0	0	0	0	0	0
1700085C21Rik	0	0	0	0	0	0	0	0	0	0	0	0	0	0	0	0	0	0	0	0	0	0	0	0	0	0	0	0	0	0	0	0	0	0	0	0	0	0	0	0	0	0	0	0	0	0	0	0	0
1700086L19Rik	0.0208333	0	0	0	0	0	0	0	0	0	0	0	0	0	0	0	0	0	0	0	0	0	0	0	0	1	0	0	0	0	0	0	0	0	0	0	0	0	0	0	0	0	0	0	0	0	0	0	0
1700086O06Rik	43.4167	15	48	38	52	59	68	16	30	25	51	87	73	43	66	41	18	37	18	15	31	31	46	58	77	36	21	35	46	45	48	41	37	44	40	40	42	47	32	31	32	49	25	80	69	62	24	67	37
1700088E04Rik	20.1667	6	33	27	15	29	20	9	43	18	18	16	17	27	35	23	8	23	6	10	23	15	19	32	26	23	8	18	27	17	15	26	10	33	22	15	19	17	12	16	20	20	15	44	19	19	18	25	11
1700091H14Rik	3.95833	0	3	0	1	3	1	0	8	1	11	15	2	9	8	3	0	5	4	0	2	0	5	1	5	19	0	1	2	4	2	5	2	1	2	3	4	2	2	2	2	4	3	11	4	4	4	7	10
1700092C02Rik	0.0208333	0	0	0	0	0	0	0	0	0	0	0	0	0	0	0	0	0	0	0	0	0	0	0	0	0	0	0	1	0	0	0	0	0	0	0	0	0	0	0	0	0	0	0	0	0	0	0	0
1700092C10Rik	0.4375	0	4	0	0	0	0	0	2	0	0	0	0	2	1	3	0	0	0	0	2	0	1	0	0	0	0	1	2	0	0	0	0	1	0	0	0	0	1	0	0	0	0	0	0	0	0	1	0
1700092E19Rik	0	0	0	0	0	0	0	0	0	0	0	0	0	0	0	0	0	0	0	0	0	0	0	0	0	0	0	0	0	0	0	0	0	0	0	0	0	0	0	0	0	0	0	0	0	0	0	0	0
1700092K14Rik	0.0208333	0	0	0	0	0	0	0	0	0	0	0	0	0	0	0	0	0	0	0	0	0	0	0	0	0	0	0	0	0	0	0	0	0	1	0	0	0	0	0	0	0	0	0	0	0	0	0	0
1700092M07Rik	1.6875	0	3	2	2	0	6	0	3	0	3	1	2	1	3	0	0	2	0	3	1	2	3	2	2	0	1	1	1	0	2	0	2	4	1	5	1	1	0	1	1	2	1	5	5	2	0	2	1
1700093K21Rik	2.02083	0	0	3	1	0	1	1	1	0	1	1	10	3	0	2	6	2	1	2	0	3	3	4	5	5	2	1	2	1	1	3	0	0	1	5	1	0	1	0	2	2	0	3	5	0	2	5	4
1700094D03Rik	106.646	39	137	68	99	105	131	39	102	56	125	207	154	103	163	88	57	105	58	57	70	110	96	224	147	108	56	61	88	123	122	133	70	86	74	90	90	98	91	74	93	145	105	291	95	129	71	170	84
1700094J05Rik	0.0833333	0	0	0	0	0	0	0	0	0	0	0	0	0	0	0	0	0	1	0	0	0	0	0	0	0	0	0	0	0	0	0	0	0	0	0	0	0	0	0	0	2	0	1	0	0	0	0	0
1700094M24Rik	0	0	0	0	0	0	0	0	0	0	0	0	0	0	0	0	0	0	0	0	0	0	0	0	0	0	0	0	0	0	0	0	0	0	0	0	0	0	0	0	0	0	0	0	0	0	0	0	0
1700095A21Rik	0.354167	0	0	0	0	2	0	0	0	0	1	0	0	0	0	0	0	2	0	0	0	0	1	2	0	0	0	0	0	0	0	0	0	0	0	0	2	0	0	1	0	0	0	0	4	0	1	0	1
1700095B10Rik	0	0	0	0	0	0	0	0	0	0	0	0	0	0	0	0	0	0	0	0	0	0	0	0	0	0	0	0	0	0	0	0	0	0	0	0	0	0	0	0	0	0	0	0	0	0	0	0	0
1700095J12Rik	0.0208333	0	0	0	0	0	0	0	0	0	0	0	0	0	0	0	0	0	0	0	0	0	0	0	0	0	0	0	0	0	0	0	0	0	0	0	0	0	0	0	0	0	1	0	0	0	0	0	0
1700096J18Rik	1.33333	0	0	3	1	1	4	0	1	0	1	4	1	0	3	0	0	2	1	1	1	1	4	4	2	1	0	6	1	0	3	0	1	0	1	1	0	3	1	0	1	0	3	5	0	1	1	0	0
1700096K18Rik	48.2083	13	56	48	43	78	61	18	43	20	63	42	66	47	71	50	13	45	33	33	39	33	52	64	66	47	39	47	31	60	63	50	29	46	44	43	48	52	39	32	34	54	51	105	74	68	29	83	37
1700096P03Rik	0	0	0	0	0	0	0	0	0	0	0	0	0	0	0	0	0	0	0	0	0	0	0	0	0	0	0	0	0	0	0	0	0	0	0	0	0	0	0	0	0	0	0	0	0	0	0	0	0
1700097N02Rik	0.0208333	0	0	0	0	0	0	0	0	0	0	0	1	0	0	0	0	0	0	0	0	0	0	0	0	0	0	0	0	0	0	0	0	0	0	0	0	0	0	0	0	0	0	0	0	0	0	0	0
1700099I09Rik	2.58333	0	0	1	1	0	5	5	1	0	3	6	10	2	3	1	2	1	0	0	1	2	6	6	5	2	2	3	0	2	1	0	1	5	5	3	3	6	0	2	4	4	3	6	3	4	0	2	2
1700100I10Rik	1.02083	0	0	0	1	0	1	0	2	0	0	6	4	0	1	1	0	0	1	0	1	8	1	2	0	1	1	0	1	1	1	0	1	1	1	1	0	0	0	0	0	0	0	5	0	1	1	3	1
1700100L14Rik	0	0	0	0	0	0	0	0	0	0	0	0	0	0	0	0	0	0	0	0	0	0	0	0	0	0	0	0	0	0	0	0	0	0	0	0	0	0	0	0	0	0	0	0	0	0	0	0	0
1700101E01Rik	2.3125	0	1	0	0	11	2	3	3	0	0	1	4	3	0	0	1	3	2	2	0	0	1	4	7	4	0	1	0	1	4	0	1	0	0	2	6	3	0	1	1	3	7	9	2	2	2	4	4
1700101I11Rik	20.1667	1	31	14	25	31	30	8	42	11	23	17	17	19	42	18	9	13	6	15	15	31	28	35	29	1	20	16	23	25	23	22	19	17	16	19	16	19	7	17	19	21	13	38	19	27	13	28	13
1700101O22Rik	0	0	0	0	0	0	0	0	0	0	0	0	0	0	0	0	0	0	0	0	0	0	0	0	0	0	0	0	0	0	0	0	0	0	0	0	0	0	0	0	0	0	0	0	0	0	0	0	0
1700102H20Rik	3	0	2	3	2	3	5	0	2	4	1	2	1	2	8	3	3	2	2	3	3	1	4	5	8	1	5	8	3	2	1	1	4	2	4	4	2	5	5	1	3	2	1	2	8	3	2	4	2
1700102P08Rik	8.20833	0	1	8	10	11	7	0	8	4	3	8	16	8	5	8	7	7	6	8	4	3	6	14	10	11	4	6	12	15	4	14	11	4	5	6	8	8	5	6	8	14	5	37	3	16	7	12	6
1700104L18Rik	0	0	0	0	0	0	0	0	0	0	0	0	0	0	0	0	0	0	0	0	0	0	0	0	0	0	0	0	0	0	0	0	0	0	0	0	0	0	0	0	0	0	0	0	0	0	0	0	0
1700105P06Rik	0.729167	0	1	0	0	2	1	0	0	0	4	0	4	1	0	0	0	0	0	1	2	0	0	1	0	4	0	0	1	0	2	1	2	0	2	0	0	0	0	0	0	1	0	0	2	3	0	0	0
1700106J16Rik	5.16667	0	0	0	0	13	6	5	2	0	10	15	11	9	0	0	0	14	6	7	0	2	0	24	9	1	0	0	0	7	6	9	1	1	0	3	6	8	0	0	0	9	5	24	0	0	0	24	3
1700108F19Rik	1.6875	0	0	1	1	0	0	1	1	0	5	10	0	1	0	2	1	3	0	0	0	2	4	2	4	0	0	1	1	2	3	1	0	0	1	1	3	0	1	0	3	3	0	2	1	4	0	7	3
1700108J01Rik	0.145833	0	0	0	0	0	0	0	0	0	0	0	0	0	0	1	0	2	0	0	0	0	0	2	0	0	0	0	0	0	0	0	0	1	0	0	0	0	0	0	0	0	0	0	0	0	1	0	0
1700109G14Rik	0	0	0	0	0	0	0	0	0	0	0	0	0	0	0	0	0	0	0	0	0	0	0	0	0	0	0	0	0	0	0	0	0	0	0	0	0	0	0	0	0	0	0	0	0	0	0	0	0
1700109G15Rik	0	0	0	0	0	0	0	0	0	0	0	0	0	0	0	0	0	0	0	0	0	0	0	0	0	0	0	0	0	0	0	0	0	0	0	0	0	0	0	0	0	0	0	0	0	0	0	0	0
1700109H08Rik	6.85417	0	7	5	15	3	2	1	5	0	6	10	9	10	12	4	8	9	1	3	3	2	3	16	12	11	8	10	7	9	8	2	13	10	6	5	2	5	6	1	7	14	6	19	6	9	3	10	2
1700109I08Rik	0.0208333	0	0	0	0	0	0	0	0	0	0	0	0	0	0	0	0	0	0	0	0	0	0	1	0	0	0	0	0	0	0	0	0	0	0	0	0	0	0	0	0	0	0	0	0	0	0	0	0
1700109K24Rik	1.02083	0	1	0	0	0	2	0	0	1	3	0	1	1	6	3	2	1	0	1	0	0	0	3	0	0	0	0	0	0	0	5	2	1	1	3	1	0	0	2	1	0	0	4	1	2	0	0	0
1700110C19Rik	0.916667	0	0	1	1	0	2	0	3	1	0	0	0	0	0	2	1	2	2	0	1	0	1	3	1	0	0	1	0	0	3	1	0	1	2	1	0	3	1	1	0	2	1	1	1	0	0	2	1
1700110I01Rik	0.1875	0	0	0	0	0	0	0	3	0	0	0	0	0	0	3	0	0	0	3	0	0	0	0	0	0	0	0	0	0	0	0	0	0	0	0	0	0	0	0	0	0	0	0	0	0	0	0	0
1700110I07Rik	0.0625	0	0	0	0	0	0	0	0	0	0	0	2	0	0	0	0	0	0	0	0	0	0	0	0	0	0	0	0	0	0	0	0	0	0	0	0	1	0	0	0	0	0	0	0	0	0	0	0
1700110K17Rik	0.958333	0	0	0	0	1	3	0	2	0	1	2	1	0	3	0	1	0	0	3	0	6	0	2	1	1	0	1	0	1	0	0	0	2	0	3	1	0	1	0	3	2	0	1	1	0	2	1	0
1700111N16Rik	0.0416667	0	0	0	0	2	0	0	0	0	0	0	0	0	0	0	0	0	0	0	0	0	0	0	0	0	0	0	0	0	0	0	0	0	0	0	0	0	0	0	0	0	0	0	0	0	0	0	0
1700112E06Rik	6.3125	0	8	8	12	9	1	0	10	0	10	2	9	6	8	8	2	5	1	2	2	7	8	9	7	3	8	1	9	2	4	5	3	7	3	11	6	32	5	5	8	7	0	9	8	7	1	19	1
1700112H15Rik	0	0	0	0	0	0	0	0	0	0	0	0	0	0	0	0	0	0	0	0	0	0	0	0	0	0	0	0	0	0	0	0	0	0	0	0	0	0	0	0	0	0	0	0	0	0	0	0	0
1700112J05Rik	0.229167	0	0	0	0	1	0	1	0	0	0	0	2	1	0	1	0	2	0	0	0	0	0	2	0	0	0	0	0	0	0	0	0	0	0	0	1	0	0	0	0	0	0	0	0	0	0	0	0
1700112J16Rik	5.08333	0	9	3	3	5	5	4	7	0	6	3	7	7	8	7	1	7	1	5	2	6	15	8	10	1	4	7	4	8	7	7	2	1	3	2	1	2	5	8	2	8	5	10	4	11	1	7	3
1700113A16Rik	120.667	47	117	119	158	146	147	47	154	65	117	209	154	132	154	115	51	101	54	64	104	118	147	238	201	141	61	126	98	108	122	100	98	103	86	124	99	110	79	86	108	98	82	273	152	144	79	231	91
1700113B09Rik	0.583333	0	0	2	1	1	0	0	1	0	1	0	0	0	3	0	0	0	0	1	0	0	0	0	1	0	0	0	1	1	1	2	0	1	0	2	0	0	0	0	2	0	0	0	1	1	3	2	0
1700113H08Rik	0.0625	0	0	0	0	0	0	0	0	0	0	0	0	1	0	0	0	0	0	0	0	0	0	0	0	0	0	0	0	0	0	0	1	0	0	0	0	1	0	0	0	0	0	0	0	0	0	0	0
1700116B05Rik	0.0833333	0	0	0	0	0	0	0	0	0	1	0	0	1	1	0	0	0	0	0	1	0	0	0	0	0	0	0	0	0	0	0	0	0	0	0	0	0	0	0	0	0	0	0	0	0	0	0	0
1700119H24Rik	7.3125	1	10	8	9	4	5	6	10	4	8	12	11	6	18	6	2	7	6	8	6	4	6	15	13	13	4	8	8	8	12	8	3	8	7	4	3	6	4	2	10	4	4	16	8	14	3	5	1
1700120C14Rik	1.95833	0	7	3	1	3	1	1	1	1	0	2	1	2	1	3	1	0	1	0	1	3	3	3	7	7	1	2	1	2	1	0	3	2	0	0	1	2	3	2	0	4	1	7	2	3	0	2	2
1700120E14Rik	0.208333	0	0	0	0	0	0	0	0	0	0	0	0	0	0	0	2	2	0	0	0	0	0	1	0	0	1	0	0	0	0	1	0	0	0	2	0	0	0	1	0	0	0	0	0	0	0	0	0
1700120G07Rik	0.0833333	0	0	0	0	0	0	0	0	0	0	0	0	0	0	0	0	0	0	0	0	0	0	0	2	0	0	0	1	0	0	0	0	0	0	0	0	0	0	0	0	0	1	0	0	0	0	0	0
1700120K04Rik	4.97917	0	2	2	12	4	7	0	2	0	5	10	12	4	4	9	3	6	4	4	5	7	5	6	4	6	4	1	5	4	2	2	6	3	6	8	3	7	6	2	3	6	6	19	6	8	2	2	4
1700121L16Rik	0.0208333	0	0	0	0	0	0	0	0	0	0	0	0	0	0	1	0	0	0	0	0	0	0	0	0	0	0	0	0	0	0	0	0	0	0	0	0	0	0	0	0	0	0	0	0	0	0	0	0
1700121N20Rik	0	0	0	0	0	0	0	0	0	0	0	0	0	0	0	0	0	0	0	0	0	0	0	0	0	0	0	0	0	0	0	0	0	0	0	0	0	0	0	0	0	0	0	0	0	0	0	0	0
1700122C19Rik	0	0	0	0	0	0	0	0	0	0	0	0	0	0	0	0	0	0	0	0	0	0	0	0	0	0	0	0	0	0	0	0	0	0	0	0	0	0	0	0	0	0	0	0	0	0	0	0	0
1700122O11Rik	0.0208333	0	0	0	0	0	0	0	0	0	0	0	0	0	0	0	0	0	0	0	0	0	0	0	0	0	0	0	0	0	0	0	0	1	0	0	0	0	0	0	0	0	0	0	0	0	0	0	0
1700123I01Rik	1.04167	0	0	5	0	0	1	0	0	1	0	2	0	0	3	1	0	0	0	0	0	1	3	0	1	2	0	0	1	0	2	1	1	2	1	3	1	1	0	2	1	0	4	3	1	2	0	2	2
1700123J17Rik	0.125	0	0	0	0	0	0	0	0	1	0	0	0	0	0	1	0	0	0	0	0	1	0	0	0	0	1	0	2	0	0	0	0	0	0	0	0	0	0	0	0	0	0	0	0	0	0	0	0
1700123K08Rik	0.0625	0	0	0	0	0	0	0	0	0	0	0	0	0	0	0	0	0	0	0	0	0	0	0	0	0	0	0	0	0	0	0	1	0	0	0	0	0	0	0	0	0	0	0	1	0	0	1	0
1700123L14Rik	0.0833333	0	0	0	0	0	0	0	0	0	0	0	1	0	0	0	0	0	0	0	0	0	1	1	0	0	0	0	0	0	0	0	0	0	0	0	0	0	0	0	0	1	0	0	0	0	0	0	0
1700123M08Rik	5.14583	0	14	8	1	9	6	3	3	0	5	3	1	2	9	9	2	9	5	4	2	2	7	3	5	4	6	1	3	3	6	6	6	2	3	4	5	3	9	5	3	11	7	18	7	6	4	7	6
1700123O12Rik	0	0	0	0	0	0	0	0	0	0	0	0	0	0	0	0	0	0	0	0	0	0	0	0	0	0	0	0	0	0	0	0	0	0	0	0	0	0	0	0	0	0	0	0	0	0	0	0	0
1700123O20Rik	323.792	124	433	354	380	439	440	124	349	202	350	313	270	308	464	336	182	239	146	196	233	351	361	556	477	347	204	294	339	378	349	392	226	312	296	329	284	300	259	294	265	344	206	744	389	400	208	460	216
1700123O21Rik	0.208333	0	0	0	0	0	0	0	0	0	0	4	0	0	0	0	0	0	0	2	0	0	0	0	1	0	1	0	0	0	0	0	0	0	0	0	0	0	0	0	0	0	0	1	0	0	0	0	1
1700124L16Rik	1.16667	0	2	0	2	1	0	0	2	1	0	4	2	1	0	1	0	3	3	2	1	2	2	4	3	3	0	0	0	2	1	0	0	1	0	1	1	1	0	0	0	0	0	3	0	1	0	5	1
1700125G02Rik	0	0	0	0	0	0	0	0	0	0	0	0	0	0	0	0	0	0	0	0	0	0	0	0	0	0	0	0	0	0	0	0	0	0	0	0	0	0	0	0	0	0	0	0	0	0	0	0	0
1700125G22Rik	1.72917	0	0	2	0	4	2	3	1	0	0	4	6	2	0	0	0	4	0	1	0	0	0	8	3	0	1	2	0	2	4	8	0	0	1	5	4	0	0	1	0	3	2	6	0	0	0	0	3
1700125H03Rik	0.104167	0	0	0	2	0	0	0	0	0	0	0	0	0	0	0	0	0	0	1	0	0	0	0	0	0	0	0	0	0	1	0	0	0	0	0	0	0	0	0	0	0	0	0	0	0	1	0	0
1700125H20Rik	0.104167	0	0	0	0	0	0	0	0	0	0	0	0	0	0	0	0	0	0	0	1	0	0	0	0	0	0	0	0	0	1	2	0	0	0	0	0	0	0	0	0	0	1	0	0	0	0	0	0
1700126H18Rik	0	0	0	0	0	0	0	0	0	0	0	0	0	0	0	0	0	0	0	0	0	0	0	0	0	0	0	0	0	0	0	0	0	0	0	0	0	0	0	0	0	0	0	0	0	0	0	0	0
1700128A07Rik	0	0	0	0	0	0	0	0	0	0	0	0	0	0	0	0	0	0	0	0	0	0	0	0	0	0	0	0	0	0	0	0	0	0	0	0	0	0	0	0	0	0	0	0	0	0	0	0	0
1700128F08Rik	0.0208333	0	0	0	0	0	0	0	0	0	0	0	0	0	0	0	0	0	0	0	0	0	0	0	0	0	0	1	0	0	0	0	0	0	0	0	0	0	0	0	0	0	0	0	0	0	0	0	0
1700129C05Rik	0	0	0	0	0	0	0	0	0	0	0	0	0	0	0	0	0	0	0	0	0	0	0	0	0	0	0	0	0	0	0	0	0	0	0	0	0	0	0	0	0	0	0	0	0	0	0	0	0
1810006J02Rik	0.625	0	0	0	0	2	0	0	1	0	1	1	0	0	0	0	0	0	0	0	0	0	4	0	0	1	0	1	0	0	0	0	2	0	3	1	1	0	1	1	0	5	0	2	2	1	0	0	0
1810007C17Rik	0	0	0	0	0	0	0	0	0	0	0	0	0	0	0	0	0	0	0	0	0	0	0	0	0	0	0	0	0	0	0	0	0	0	0	0	0	0	0	0	0	0	0	0	0	0	0	0	0
1810007D17Rik	0	0	0	0	0	0	0	0	0	0	0	0	0	0	0	0	0	0	0	0	0	0	0	0	0	0	0	0	0	0	0	0	0	0	0	0	0	0	0	0	0	0	0	0	0	0	0	0	0
1810008I18Rik	0.354167	0	0	0	1	2	3	0	0	0	0	0	0	1	1	0	0	0	1	0	0	1	0	0	0	0	0	0	0	0	0	0	0	0	0	0	4	0	0	0	0	0	1	1	0	0	0	1	0
1810009A15Rik	13.625	3	16	19	27	19	16	4	14	10	15	23	8	8	16	18	4	12	3	6	6	13	17	27	15	25	11	18	15	16	16	13	10	19	15	8	9	9	9	11	12	13	12	34	19	16	7	14	3
1810009J06Rik	0.354167	0	0	0	0	0	0	0	0	0	0	0	0	0	0	0	0	0	0	0	0	0	0	0	0	14	0	0	0	0	0	0	0	1	0	0	0	0	0	0	0	0	1	0	1	0	0	0	0
1810010D01Rik	5.14583	0	3	11	9	8	9	0	8	4	7	14	14	2	5	6	3	3	1	0	2	2	6	3	11	8	1	5	4	2	4	2	4	2	1	2	8	6	2	7	3	4	1	16	6	8	5	7	4
1810010H24Rik	22.3125	7	29	24	16	37	14	7	30	7	49	30	33	18	42	15	10	15	12	18	24	19	17	38	24	18	15	10	14	34	18	24	13	14	11	33	31	16	17	12	13	36	17	57	20	24	10	52	24
1810011H11Rik	12.4167	0	3	8	6	3	10	1	15	2	11	17	12	20	14	11	9	10	0	7	10	15	8	20	20	107	0	10	3	6	9	6	11	12	7	15	8	14	8	8	8	5	7	27	17	8	9	30	18
1810011O10Rik	514.292	169	402	388	584	525	730	245	599	272	563	1121	950	630	681	489	223	599	250	286	337	418	522	1260	1332	704	169	228	285	413	467	613	275	400	192	520	526	491	310	351	406	592	468	1112	561	628	181	633	415
1810012K16Rik	3.45833	0	3	1	5	7	1	4	8	0	0	6	3	0	7	2	5	6	0	4	1	4	3	3	5	6	4	3	1	3	2	3	3	5	5	6	2	4	1	5	5	8	3	6	3	2	1	2	4
1810013A23Rik	0.854167	0	6	0	1	4	1	1	0	0	1	2	0	1	1	1	1	0	0	1	0	0	0	0	2	1	1	0	0	0	3	0	0	2	0	1	0	1	0	0	0	3	0	1	0	2	0	1	1
1810013L24Rik	706.708	246	975	679	962	667	878	246	705	333	684	501	483	568	1056	758	416	695	358	461	553	741	807	1043	943	669	427	712	819	720	745	868	664	782	632	726	517	675	698	717	779	938	541	1624	897	971	426	992	431
1810014B01Rik	114.854	50	142	83	138	106	172	50	139	78	133	94	98	115	151	134	55	102	53	73	78	100	138	183	225	53	60	113	105	145	134	135	100	123	95	93	119	130	79	101	122	159	78	278	129	140	81	170	62
1810018F18Rik	0	0	0	0	0	0	0	0	0	0	0	0	0	0	0	0	0	0	0	0	0	0	0	0	0	0	0	0	0	0	0	0	0	0	0	0	0	0	0	0	0	0	0	0	0	0	0	0	0
1810019D21Rik	427.667	177	572	421	489	524	460	180	530	233	625	811	561	336	735	440	198	350	191	296	359	473	549	748	655	177	307	383	444	440	427	366	321	374	411	334	294	304	286	336	343	479	260	823	543	521	265	695	371
1810020O05Rik	1.45833	0	4	0	0	0	0	0	0	0	1	1	2	2	7	2	1	2	0	0	0	1	7	5	0	0	1	4	3	3	1	3	1	1	0	0	2	2	0	1	1	2	1	1	1	2	1	2	1
1810021B22Rik	27.1458	6	20	21	36	37	20	6	29	20	22	43	44	25	32	22	21	16	11	15	16	29	41	59	44	7	24	10	26	27	32	35	20	33	27	40	20	23	21	24	17	30	14	60	48	36	18	53	19
1810022K09Rik	222.188	76	339	173	312	193	285	108	259	118	359	279	249	247	383	186	76	173	101	128	147	193	240	339	352	255	131	216	196	227	198	228	167	210	211	196	186	208	153	190	197	239	152	446	290	319	146	340	193
1810024B03Rik	10.5	3	16	4	13	10	13	5	10	9	17	11	22	5	24	7	5	11	8	10	9	8	9	17	20	18	5	8	6	8	9	9	10	11	3	8	13	8	4	9	14	14	5	27	11	11	3	10	7
1810026B05Rik	252.438	74	307	177	262	254	312	74	277	109	357	377	346	270	309	198	112	233	119	171	193	263	236	492	443	388	135	182	163	263	221	227	248	250	176	219	178	229	169	194	194	313	222	659	329	347	183	409	167
1810026J23Rik	888.521	331	1140	867	1172	1091	1240	331	1251	483	745	358	412	739	1285	1014	431	862	391	557	659	903	1149	1305	1263	681	698	834	998	1075	984	992	839	1063	786	942	832	854	770	816	954	1003	663	1993	1042	1270	603	1193	605
1810030O07Rik	321.292	132	384	236	350	357	434	149	317	172	321	369	333	264	440	309	132	354	181	198	256	374	343	608	448	469	240	282	298	325	359	434	260	281	242	362	324	315	229	248	284	391	264	772	330	349	180	466	214
1810032O08Rik	203.875	53	159	177	176	234	339	94	183	95	263	404	285	376	208	153	69	159	53	76	136	154	181	310	615	199	110	114	135	250	246	247	193	159	134	198	170	184	128	118	116	211	130	490	262	272	125	357	177
1810034E14Rik	112.479	39	195	183	204	119	135	46	136	62	108	65	118	93	199	125	58	79	39	46	85	91	152	187	192	45	114	109	151	130	128	115	84	130	109	92	112	89	108	82	95	125	58	210	108	143	64	142	67
1810037I17Rik	499.479	172	504	577	691	684	740	221	633	206	548	661	709	515	647	441	172	450	246	230	406	384	582	845	878	625	343	419	475	548	494	547	391	393	372	436	353	450	322	377	363	520	348	1086	678	652	325	672	440
1810041H14Rik	6.9375	1	5	11	13	4	5	2	2	4	23	24	16	8	6	10	4	3	1	3	7	1	13	18	8	1	5	5	7	4	9	6	3	6	2	6	2	1	3	5	7	7	8	15	8	9	4	8	7
1810041L15Rik	17.8125	2	2	12	13	26	14	12	16	9	24	11	9	22	10	13	7	43	10	10	6	10	6	44	28	41	4	12	5	23	40	33	22	19	9	23	19	19	8	20	11	33	29	55	11	8	6	23	9
1810043G02Rik	242.25	112	273	288	288	381	335	120	299	132	286	244	268	235	409	223	119	251	112	119	211	194	281	489	406	204	145	202	221	275	275	248	187	218	209	243	195	222	160	179	163	261	162	480	300	325	152	317	185
1810043H04Rik	215.875	82	230	257	215	289	282	90	282	92	272	254	270	258	276	190	82	168	108	132	176	175	284	407	426	152	154	161	226	244	239	202	169	160	186	207	212	209	154	141	149	248	146	459	252	268	126	358	172
1810044D09Rik	37.5417	14	57	39	43	39	35	27	45	26	51	33	41	29	81	47	17	24	16	14	21	34	55	53	62	17	31	44	48	30	34	46	23	34	31	29	35	20	28	24	40	49	29	90	58	37	38	55	21
1810046K07Rik	0.5	0	0	0	1	2	0	0	0	0	1	0	1	1	0	0	0	1	0	0	0	0	0	3	1	5	0	0	0	0	0	1	0	0	1	1	0	0	2	1	0	0	0	1	1	0	0	0	0
1810053B23Rik	0.0208333	0	0	0	0	0	0	0	0	0	0	0	0	0	0	0	0	0	0	0	0	0	0	0	0	0	0	0	0	0	0	0	0	0	0	0	1	0	0	0	0	0	0	0	0	0	0	0	0
1810055G02Rik	86.9167	36	84	67	102	124	124	36	90	40	138	81	75	88	127	90	36	82	53	62	71	58	70	156	123	156	51	53	67	102	100	100	58	66	69	113	92	98	59	57	81	75	77	197	122	119	47	130	61
1810058I24Rik	561	253	672	514	687	619	638	253	633	311	692	741	702	535	936	551	266	518	288	310	351	399	706	1078	1015	689	385	517	590	673	611	609	441	506	431	561	521	492	330	404	474	683	370	1075	597	604	354	788	433
1810062G17Rik	3.58333	0	10	3	9	5	2	3	7	0	4	6	2	2	3	5	2	2	5	2	6	2	1	3	4	3	3	3	2	6	2	0	4	1	0	8	3	0	3	3	1	5	3	9	8	5	2	7	3
1810062O18Rik	3.39583	0	5	8	2	4	5	0	4	1	1	5	13	6	3	3	0	3	2	1	2	0	5	4	6	6	0	2	6	3	7	2	3	0	1	2	6	3	1	2	6	3	1	10	4	1	0	7	2
1810063I02Rik	2.6875	0	2	1	2	3	7	0	5	0	4	11	4	1	7	0	1	3	4	3	3	0	1	11	2	0	1	1	2	5	2	0	0	1	1	4	5	1	0	3	1	5	1	3	1	4	0	4	6
1810064F22Rik	4.375	0	15	5	6	8	13	3	0	1	1	1	0	6	2	0	0	5	2	2	3	1	4	5	9	13	2	2	1	6	6	8	6	2	2	5	4	1	3	1	2	11	6	17	4	1	2	7	6
1810065E05Rik	0.145833	0	0	0	0	0	0	0	0	0	0	0	2	0	0	0	1	0	0	0	0	0	0	3	0	0	0	0	0	0	0	0	0	0	0	0	0	0	0	0	0	0	0	0	0	0	0	0	0
2010001A14Rik	101.917	27	156	123	124	136	143	41	156	27	119	109	103	85	165	70	40	98	41	59	76	89	152	142	205	51	73	104	91	101	114	93	76	78	98	84	102	85	69	84	86	118	91	192	133	119	62	176	82
2010001E11Rik	263.042	91	322	259	358	262	306	91	339	135	277	146	156	216	394	282	144	228	109	144	202	318	357	293	351	127	214	320	307	313	300	283	288	355	285	297	261	243	242	288	307	274	145	548	344	345	173	368	159
2010003K11Rik	17.7917	2	26	17	15	27	19	4	22	9	12	2	11	21	44	18	5	18	9	9	16	20	28	18	26	25	9	14	17	17	16	19	25	16	22	19	11	6	19	24	20	9	12	30	27	30	24	17	22
2010005H15Rik	1.39583	0	0	2	1	3	1	0	0	2	3	5	0	2	0	1	0	0	0	0	1	1	11	8	4	0	0	0	1	0	0	3	1	0	2	0	0	1	1	3	2	0	1	2	0	1	0	1	1
2010009K17Rik	0.208333	0	0	0	0	0	1	0	0	0	0	0	0	0	0	0	0	0	0	0	0	0	0	0	0	0	0	1	1	1	0	0	0	0	0	0	0	0	0	0	0	0	1	3	1	1	0	0	0
2010010A06Rik	18.8542	3	21	12	20	18	37	3	30	15	21	43	18	17	15	18	6	20	3	10	23	19	31	31	37	22	9	19	13	18	21	22	14	8	13	17	11	25	10	20	15	16	13	43	23	13	13	26	16
2010012O05Rik	138.542	59	202	119	152	176	186	73	110	68	149	132	156	147	179	94	59	111	72	67	94	148	135	224	239	159	110	134	132	186	163	176	113	97	101	187	102	140	89	119	116	147	127	320	162	163	99	210	125
2010016I18Rik	2.70833	0	0	2	0	1	6	0	0	2	3	10	2	3	3	1	0	5	2	1	2	1	0	4	6	25	1	0	1	0	0	0	7	1	1	5	3	7	2	1	1	3	1	10	3	2	1	1	0
2010106C02Rik	0.291667	0	0	0	0	0	0	0	1	0	0	6	0	0	0	0	0	2	0	2	0	0	0	0	0	0	1	0	0	0	0	0	0	0	0	0	0	0	0	0	0	1	0	1	0	0	0	0	0
2010106E10Rik	0	0	0	0	0	0	0	0	0	0	0	0	0	0	0	0	0	0	0	0	0	0	0	0	0	0	0	0	0	0	0	0	0	0	0	0	0	0	0	0	0	0	0	0	0	0	0	0	0
2010107E04Rik	1390.15	632	1831	1197	1814	1514	2056	706	1500	746	1913	1420	1587	1330	1937	1277	632	1300	677	776	866	1242	1437	2729	2729	793	942	1057	1276	1702	1555	1455	957	1182	1087	1430	1232	1290	1006	1036	1132	1593	1065	2944	1531	1707	922	2152	1220
2010107G12Rik	1.97917	0	3	3	0	8	1	2	3	0	0	8	2	2	1	1	1	0	0	1	2	0	1	2	2	1	2	3	2	3	1	2	4	1	6	6	1	0	0	2	0	2	3	1	4	2	1	3	1
2010107G23Rik	80.3333	25	90	64	72	87	117	25	83	33	99	104	100	82	91	78	26	81	43	54	64	84	80	135	148	118	52	55	79	79	87	90	61	82	68	103	72	73	54	75	76	123	58	152	78	78	51	137	62
2010109A12Rik	2.52083	0	3	1	3	1	6	0	1	0	3	0	4	0	1	3	3	8	0	1	2	5	1	6	1	2	4	3	1	5	9	2	0	3	0	6	2	0	3	6	3	2	3	4	3	2	0	4	0
2010109I03Rik	0.854167	0	2	2	1	0	2	0	0	0	1	3	4	1	0	1	1	0	1	0	0	2	0	0	1	0	0	0	1	0	3	0	1	0	2	1	0	0	0	0	0	0	1	6	1	1	0	2	0
2010111I01Rik	712.292	285	698	558	722	851	1017	359	722	302	887	1389	1213	646	915	535	285	526	308	442	481	508	640	1367	1331	867	414	544	601	848	921	791	536	569	534	743	607	656	484	486	517	850	478	1763	810	789	383	1107	634
2010204K13Rik	49.8542	19	53	38	31	76	69	19	52	41	57	81	100	71	58	31	21	52	39	33	27	27	50	118	126	53	28	28	39	60	52	43	31	28	38	57	56	40	31	20	36	70	35	112	44	35	25	76	36
2010300C02Rik	17.3125	2	9	12	20	22	23	4	23	8	13	35	16	10	26	15	19	20	16	8	26	7	19	26	27	28	6	15	10	15	28	23	17	10	9	9	13	10	26	20	17	31	10	39	25	27	11	21	2
2010308F09Rik	1.85417	0	0	0	1	1	3	1	1	1	1	9	5	0	0	3	2	2	2	0	1	0	1	2	2	0	3	3	1	4	5	0	4	2	0	1	2	3	0	3	0	0	2	5	1	4	1	2	3
2010310C07Rik	0.416667	0	0	0	0	1	0	0	2	1	0	0	1	0	3	0	0	0	2	1	0	0	0	0	3	1	0	0	0	0	1	0	0	0	0	0	0	1	0	0	0	2	0	0	1	0	0	0	0
2010315B03Rik	267.375	112	390	185	288	243	363	112	289	167	286	217	247	201	390	225	139	304	137	188	156	278	256	384	399	193	207	237	285	325	284	332	281	252	240	273	239	297	206	259	242	380	238	622	334	402	163	376	192
2010320M18Rik	133.562	47	176	130	161	158	195	59	186	59	149	196	157	126	242	124	47	114	59	60	111	103	169	201	244	133	78	110	118	166	124	131	102	105	111	136	103	138	102	92	123	155	69	282	155	154	57	221	111
2200002D01Rik	79.7292	31	74	81	62	87	96	49	109	50	138	145	147	94	108	72	31	75	38	36	76	59	108	150	118	314	36	53	64	67	57	47	75	83	51	73	44	77	48	52	41	65	56	136	66	73	38	106	46
2200002J24Rik	1.60417	0	1	5	1	3	0	2	0	2	0	3	1	2	2	3	1	0	1	2	2	0	0	1	6	0	0	2	1	4	2	3	1	1	1	2	1	2	1	3	1	1	1	5	0	3	1	1	0
2210010C04Rik	0	0	0	0	0	0	0	0	0	0	0	0	0	0	0	0	0	0	0	0	0	0	0	0	0	0	0	0	0	0	0	0	0	0	0	0	0	0	0	0	0	0	0	0	0	0	0	0	0
2210011C24Rik	119.583	34	128	219	200	195	141	43	123	51	95	88	109	87	213	161	69	62	37	36	168	119	208	200	141	34	137	143	167	133	123	93	130	166	163	77	72	74	113	103	121	65	54	203	156	170	79	138	61
2210013O21Rik	118.583	38	119	107	134	138	197	81	119	38	150	125	140	133	156	98	49	99	55	64	63	101	116	217	208	205	80	95	96	157	137	118	103	88	78	163	96	117	69	85	102	157	83	276	147	126	59	166	89
2210015D19Rik	89.0625	34	144	79	97	123	105	46	66	58	85	69	103	101	137	100	44	78	34	74	61	57	100	140	146	77	54	79	80	98	120	85	78	88	86	97	75	88	69	75	82	106	64	201	100	121	55	112	77
2210016F16Rik	612.188	264	560	643	706	851	838	296	818	303	691	537	626	580	790	538	264	530	282	333	490	663	709	1086	1005	500	434	531	589	694	705	660	528	625	544	634	512	556	500	514	534	620	431	1247	712	807	415	941	518
2210016L21Rik	488.583	200	472	475	612	592	642	200	701	252	655	458	598	549	717	470	267	407	227	273	436	386	581	921	936	540	302	363	450	507	481	519	421	459	392	442	439	445	380	390	411	493	322	1051	617	557	284	729	334
2210018M11Rik	250.833	94	283	207	256	274	271	94	255	146	315	353	282	240	424	224	157	305	136	188	185	262	318	452	446	302	122	174	182	226	238	269	239	281	177	243	168	192	177	216	257	302	262	664	265	277	143	312	152
2210019I11Rik	0	0	0	0	0	0	0	0	0	0	0	0	0	0	0	0	0	0	0	0	0	0	0	0	0	0	0	0	0	0	0	0	0	0	0	0	0	0	0	0	0	0	0	0	0	0	0	0	0
2210039B01Rik	6.8125	2	5	8	9	9	7	5	4	3	3	4	8	3	8	6	4	6	3	5	8	2	4	7	10	3	3	7	3	12	10	5	10	9	8	6	4	4	4	8	5	11	8	19	6	19	3	20	7
2210404E10Rik	0.666667	0	0	1	1	3	3	1	1	0	0	1	0	4	1	1	0	0	0	0	0	1	0	0	1	0	3	0	0	0	0	2	2	1	0	1	0	0	0	1	0	1	0	1	0	0	0	1	0
2210404O09Rik	54.8333	20	56	43	64	53	67	34	42	20	65	39	39	41	98	44	26	57	20	45	43	50	51	86	96	77	34	47	36	62	48	70	56	44	39	57	54	57	41	48	54	77	53	145	65	80	44	94	36
2210406O10Rik	9.66667	1	11	12	4	15	19	12	6	4	18	19	9	9	9	7	6	3	1	1	7	7	3	11	13	2	5	10	6	14	18	13	10	7	3	6	8	12	8	6	10	15	6	27	12	9	11	21	13
2210407C18Rik	0.0625	0	0	0	0	0	0	0	0	0	0	0	0	0	0	0	0	0	0	0	0	0	3	0	0	0	0	0	0	0	0	0	0	0	0	0	0	0	0	0	0	0	0	0	0	0	0	0	0
2210408F21Rik	104.25	35	120	126	213	127	81	35	127	59	82	72	73	65	189	133	54	99	57	51	110	99	106	181	155	43	105	99	129	65	96	90	114	133	93	90	69	81	83	104	108	100	70	225	166	188	84	120	69
2210408I21Rik	78.4375	28	150	66	117	94	95	30	76	46	86	52	28	66	172	96	47	70	31	47	35	107	83	119	101	50	52	91	88	89	77	95	86	91	58	79	58	82	66	86	97	106	54	166	96	88	45	84	31
2210409D07Rik	0	0	0	0	0	0	0	0	0	0	0	0	0	0	0	0	0	0	0	0	0	0	0	0	0	0	0	0	0	0	0	0	0	0	0	0	0	0	0	0	0	0	0	0	0	0	0	0	0
2210409E12Rik	3.89583	0	4	4	3	13	4	4	7	1	7	6	7	2	3	3	1	2	3	2	2	0	1	10	1	8	2	3	4	10	7	2	2	2	2	5	8	7	0	2	0	3	4	6	1	6	2	2	7
2210414B05Rik	0	0	0	0	0	0	0	0	0	0	0	0	0	0	0	0	0	0	0	0	0	0	0	0	0	0	0	0	0	0	0	0	0	0	0	0	0	0	0	0	0	0	0	0	0	0	0	0	0
2210416O15Rik	10.4375	1	5	12	23	24	20	2	18	1	2	14	17	10	14	6	4	11	10	3	7	2	18	24	22	13	4	4	5	11	13	12	8	14	7	14	10	9	4	6	6	10	6	21	6	14	5	15	11
2210417A02Rik	0.0625	0	0	0	0	0	0	0	0	0	0	0	1	0	0	0	0	0	0	0	0	2	0	0	0	0	0	0	0	0	0	0	0	0	0	0	0	0	0	0	0	0	0	0	0	0	0	0	0
2210420H20Rik	0	0	0	0	0	0	0	0	0	0	0	0	0	0	0	0	0	0	0	0	0	0	0	0	0	0	0	0	0	0	0	0	0	0	0	0	0	0	0	0	0	0	0	0	0	0	0	0	0
2300002M23Rik	0.229167	0	0	0	0	0	0	0	0	0	0	0	0	0	0	0	0	0	0	0	1	0	1	2	0	1	0	0	0	0	0	0	0	0	0	0	0	0	0	0	0	0	0	2	0	0	1	0	2
2300003K06Rik	0	0	0	0	0	0	0	0	0	0	0	0	0	0	0	0	0	0	0	0	0	0	0	0	0	0	0	0	0	0	0	0	0	0	0	0	0	0	0	0	0	0	0	0	0	0	0	0	0
2300005B03Rik	0.125	0	0	0	0	0	0	0	0	0	0	0	0	0	0	0	0	0	0	0	0	0	1	0	0	0	0	0	0	0	0	1	0	0	0	0	0	0	0	0	0	0	1	0	3	0	0	0	0
2300009A05Rik	190.208	77	222	234	342	208	224	82	247	116	289	162	171	180	407	189	124	146	77	90	198	178	214	282	274	115	162	183	226	203	176	177	188	195	192	185	179	166	158	141	149	156	91	337	226	241	115	268	147
2310001H17Rik	60.6458	22	69	43	60	56	77	30	76	35	69	106	58	71	102	73	25	62	31	54	37	39	71	88	92	78	28	49	69	64	61	75	68	59	50	59	43	58	44	50	43	78	59	145	61	67	22	89	36
2310001K24Rik	1.22917	0	9	4	0	0	3	1	2	0	0	0	0	0	1	1	1	0	1	1	1	0	2	0	0	0	2	3	2	1	1	0	2	0	1	0	0	0	2	5	0	2	1	3	5	0	1	1	0
2310002D06Rik	0.0625	0	0	0	0	0	0	0	0	0	0	0	0	0	0	0	0	0	0	0	0	0	0	0	0	2	0	0	0	0	0	0	0	0	0	1	0	0	0	0	0	0	0	0	0	0	0	0	0
2310002F09Rik	0.458333	0	0	0	0	0	1	0	0	0	0	4	1	0	2	0	0	0	0	0	0	2	0	0	2	2	0	0	0	0	0	0	0	0	0	0	0	2	0	0	0	0	0	1	0	1	0	0	1
2310002L09Rik	0.0208333	0	0	0	0	0	0	0	0	0	0	0	0	0	0	0	0	0	0	0	0	0	0	0	0	0	0	0	0	0	0	0	0	0	0	0	0	1	0	0	0	0	0	0	0	0	0	0	0
2310003N18Rik	0.0416667	0	0	0	0	0	0	0	0	0	0	0	0	0	0	0	0	0	0	0	0	0	0	0	0	0	0	0	0	0	0	0	0	1	0	0	0	0	1	0	0	0	0	0	0	0	0	0	0
2310005A03Rik	1.95833	0	4	0	1	2	3	0	3	1	0	2	3	1	3	2	0	0	2	0	0	1	1	0	3	0	0	4	6	2	2	3	0	1	4	3	1	4	4	0	0	1	1	8	4	3	2	7	2
2310005E17Rik	0.1875	0	0	0	0	0	0	0	0	0	1	1	0	0	0	0	0	0	0	0	0	0	0	0	0	0	0	0	0	0	1	0	0	0	1	0	1	0	0	0	1	0	1	2	0	0	0	0	0
2310007B03Rik	64.3125	10	23	22	24	118	106	47	28	20	97	136	127	95	36	28	10	101	45	56	23	22	24	207	154	50	10	16	19	85	118	93	33	19	14	129	100	91	17	17	25	90	55	160	41	26	17	153	96
2310008N11Rik	1.39583	0	0	5	1	1	0	0	2	3	6	4	0	2	2	4	2	2	0	1	0	0	1	1	2	0	1	6	0	0	0	0	1	0	1	1	1	0	1	2	2	0	0	5	1	2	0	0	3
2310009A05Rik	107.312	47	148	92	150	112	139	54	183	62	143	143	166	105	146	104	48	97	47	60	60	92	123	220	159	85	75	98	101	123	98	119	83	80	75	109	86	104	67	71	83	78	74	216	149	136	77	171	80
2310009B15Rik	45.3125	13	36	46	52	84	55	20	61	16	61	36	65	44	79	42	13	44	29	24	37	33	67	96	109	50	25	27	54	45	43	53	47	33	31	42	40	48	43	29	37	49	30	86	50	44	13	57	21
2310010G23Rik	9.41667	0	23	6	3	8	17	9	7	0	23	14	18	5	8	4	2	6	8	9	6	2	9	5	24	7	8	9	7	16	5	13	9	6	8	9	11	14	7	4	3	15	10	20	14	4	4	11	10
2310010J17Rik	35.875	10	41	30	39	34	61	14	54	10	43	56	53	21	57	50	19	37	23	26	23	44	36	50	52	18	18	18	19	26	52	36	36	30	40	33	37	33	22	24	23	43	21	86	56	55	18	62	20
2310011J03Rik	308.75	131	287	341	393	470	441	131	420	135	296	235	284	292	414	258	138	254	174	194	288	274	376	564	472	467	219	237	255	345	342	307	283	293	240	358	288	321	252	242	257	359	221	634	360	311	183	471	218
2310015A10Rik	80.6042	36	69	63	76	111	92	36	97	36	101	87	95	80	87	100	53	94	39	80	67	64	91	168	125	128	50	62	62	78	83	83	103	88	38	78	43	66	66	73	68	101	70	176	111	99	41	109	36
2310015D24Rik	0.0833333	0	0	0	0	1	0	0	0	0	0	0	0	1	0	0	0	0	0	0	0	0	0	0	0	0	0	0	0	0	0	0	0	0	0	0	0	0	0	0	0	0	0	0	1	0	0	0	1
2310016D03Rik	0	0	0	0	0	0	0	0	0	0	0	0	0	0	0	0	0	0	0	0	0	0	0	0	0	0	0	0	0	0	0	0	0	0	0	0	0	0	0	0	0	0	0	0	0	0	0	0	0
2310020H05Rik	0.333333	0	0	0	0	0	1	0	0	0	0	0	0	1	0	0	0	0	2	0	0	0	0	2	2	0	0	0	0	0	2	1	0	0	0	0	0	1	0	0	0	1	0	0	0	0	0	0	1
2310022A10Rik	161.438	79	187	151	164	213	222	79	208	92	183	140	121	167	223	153	94	141	87	88	120	151	169	264	238	274	107	107	131	179	193	192	149	167	126	195	182	134	133	107	133	168	114	374	185	177	106	241	121
2310022B05Rik	646.458	276	802	670	852	905	776	276	797	309	640	652	585	568	955	621	303	649	299	364	526	499	667	1096	923	1398	448	585	575	676	764	718	513	611	513	688	636	640	591	557	594	577	389	1312	793	811	300	758	427
2310030A07Rik	0.0833333	0	0	0	1	0	0	0	0	0	0	0	0	0	0	0	0	1	0	0	0	0	0	0	0	0	0	0	0	0	0	0	0	0	1	0	0	0	0	0	0	0	0	0	0	0	1	0	0
2310030G06Rik	423.729	147	783	551	793	354	412	164	658	354	480	287	262	276	780	524	245	356	147	185	410	602	641	573	493	205	396	485	557	398	421	352	425	490	527	285	245	273	365	456	465	367	240	641	573	661	311	436	215
2310033P09Rik	215.75	69	214	233	265	281	282	95	270	70	229	536	338	229	267	202	94	182	69	98	182	149	243	420	408	257	131	166	155	244	205	190	158	184	171	206	141	163	112	139	176	221	153	443	301	279	137	345	158
2310034C09Rik	0	0	0	0	0	0	0	0	0	0	0	0	0	0	0	0	0	0	0	0	0	0	0	0	0	0	0	0	0	0	0	0	0	0	0	0	0	0	0	0	0	0	0	0	0	0	0	0	0
2310034G01Rik	16.4583	3	11	18	8	42	26	5	13	4	22	28	26	13	11	11	7	19	5	15	11	16	11	25	39	17	3	9	9	34	34	17	6	10	9	16	12	25	9	11	13	18	9	56	16	15	6	23	11
2310034O05Rik	0.125	0	0	0	0	0	0	0	0	1	0	0	0	0	0	0	0	0	0	0	0	0	0	0	0	0	0	0	0	0	0	0	0	0	0	0	0	0	0	0	0	4	0	0	1	0	0	0	0
2310035C23Rik	429.5	160	609	379	512	369	536	160	484	224	448	394	368	335	663	481	226	482	185	265	243	580	407	631	642	379	270	391	395	478	459	489	447	465	340	437	368	321	403	460	467	614	377	1099	494	567	222	539	243
2310036O22Rik	1145.75	457	1081	1261	1475	1496	1577	457	1573	514	1353	1688	1574	1309	1426	947	509	800	514	578	1074	867	1321	2219	2138	1236	791	857	1040	1217	1225	1041	925	1161	989	986	945	995	828	809	935	979	688	2391	1423	1375	760	1825	960
2310039H08Rik	271.5	86	401	508	454	358	343	109	439	175	276	377	289	235	476	272	158	184	86	101	305	269	403	349	372	131	220	266	362	227	268	239	193	289	294	159	190	190	210	204	253	189	155	473	365	418	161	312	147
2310039L15Rik	0	0	0	0	0	0	0	0	0	0	0	0	0	0	0	0	0	0	0	0	0	0	0	0	0	0	0	0	0	0	0	0	0	0	0	0	0	0	0	0	0	0	0	0	0	0	0	0	0
2310040G24Rik	7.72917	0	9	2	1	12	15	4	9	0	16	9	17	6	3	11	2	13	5	8	2	8	5	15	12	11	3	3	7	11	7	7	12	3	3	14	8	8	3	5	3	9	7	13	6	10	1	20	5
2310043L19Rik	7.04167	0	11	9	23	10	5	1	11	0	14	20	9	1	5	8	3	0	0	3	4	5	17	4	8	3	9	4	9	4	10	2	5	9	13	7	5	5	5	1	8	3	3	8	9	18	6	6	3
2310043O21Rik	0.229167	0	0	0	0	0	0	0	0	0	2	0	0	0	0	0	0	1	0	0	0	0	0	0	0	0	0	0	0	0	2	1	0	0	0	2	0	0	1	0	0	0	0	0	0	0	0	1	0
2310045N01Rik	329.792	158	423	356	363	445	466	158	425	160	393	463	361	359	451	317	177	299	194	219	238	264	333	617	535	437	180	254	282	323	337	373	243	340	260	289	321	297	212	278	237	398	260	706	341	366	180	463	224
2310045n01rik-mef2b	0	0	0	0	0	0	0	0	0	0	0	0	0	0	0	0	0	0	0	0	0	0	0	0	0	0	0	0	0	0	0	0	0	0	0	0	0	0	0	0	0	0	0	0	0	0	0	0	0
2310047M10Rik	194.5	49	182	210	208	294	247	78	272	49	192	200	189	203	297	177	91	147	80	99	205	166	217	363	307	295	124	168	179	229	205	202	158	185	158	217	180	214	146	118	156	202	125	470	233	241	104	273	129
2310050C09Rik	0	0	0	0	0	0	0	0	0	0	0	0	0	0	0	0	0	0	0	0	0	0	0	0	0	0	0	0	0	0	0	0	0	0	0	0	0	0	0	0	0	0	0	0	0	0	0	0	0
2310057J18Rik	0	0	0	0	0	0	0	0	0	0	0	0	0	0	0	0	0	0	0	0	0	0	0	0	0	0	0	0	0	0	0	0	0	0	0	0	0	0	0	0	0	0	0	0	0	0	0	0	0
2310057M21Rik	75.9792	34	75	65	99	103	133	37	90	34	91	79	46	46	91	63	36	66	37	50	56	85	97	123	119	75	52	57	88	86	76	81	73	52	63	87	71	91	84	51	60	92	74	160	74	97	52	123	57
2310057N15Rik	0	0	0	0	0	0	0	0	0	0	0	0	0	0	0	0	0	0	0	0	0	0	0	0	0	0	0	0	0	0	0	0	0	0	0	0	0	0	0	0	0	0	0	0	0	0	0	0	0
2310061I04Rik	845.021	405	1098	802	1024	1106	1181	409	1117	441	888	913	883	815	1398	778	426	820	405	468	644	769	941	1441	1492	464	508	699	789	868	1019	850	618	724	704	860	697	773	534	654	685	933	571	1967	1072	1110	583	1289	736
2310061N02Rik	0	0	0	0	0	0	0	0	0	0	0	0	0	0	0	0	0	0	0	0	0	0	0	0	0	0	0	0	0	0	0	0	0	0	0	0	0	0	0	0	0	0	0	0	0	0	0	0	0
2310065F04Rik	0	0	0	0	0	0	0	0	0	0	0	0	0	0	0	0	0	0	0	0	0	0	0	0	0	0	0	0	0	0	0	0	0	0	0	0	0	0	0	0	0	0	0	0	0	0	0	0	0
2310067B10Rik	1607.12	767	1700	1675	1779	2350	2058	809	2072	767	1634	1530	1305	1640	2624	1614	865	1621	833	1128	1365	1448	1875	2644	2603	1030	1025	1311	1527	1768	1953	1715	1326	1672	1617	1740	1487	1736	1165	1408	1416	1926	1111	3582	1749	1783	881	2230	1069
2310068J16Rik	11.125	3	4	21	4	12	12	5	19	5	12	24	9	12	12	15	5	13	7	5	11	3	10	20	24	7	10	9	8	12	11	12	9	11	10	10	6	5	13	14	7	18	4	24	12	16	7	24	6
2310069B03Rik	0.25	0	1	0	0	0	0	0	0	0	0	0	0	0	1	0	0	0	0	1	0	0	0	0	0	1	0	0	0	0	1	0	0	1	0	0	0	0	0	0	0	0	2	0	0	0	0	0	4
2310069G16Rik	0.770833	0	0	0	2	2	1	0	2	0	1	0	2	3	0	0	0	0	0	0	1	0	0	2	1	0	0	0	2	2	1	1	0	1	1	0	0	1	0	0	1	3	0	1	1	2	1	2	0
2310075C17Rik	0	0	0	0	0	0	0	0	0	0	0	0	0	0	0	0	0	0	0	0	0	0	0	0	0	0	0	0	0	0	0	0	0	0	0	0	0	0	0	0	0	0	0	0	0	0	0	0	0
2310079G19Rik	0	0	0	0	0	0	0	0	0	0	0	0	0	0	0	0	0	0	0	0	0	0	0	0	0	0	0	0	0	0	0	0	0	0	0	0	0	0	0	0	0	0	0	0	0	0	0	0	0
2310081J21Rik	64.1458	0	46	82	96	88	122	60	52	34	100	170	75	66	73	44	28	64	26	30	54	45	84	152	93	0	32	80	76	64	80	87	38	64	36	32	44	75	52	74	70	42	25	92	52	128	18	72	26
2400006E01Rik	0.145833	0	0	0	0	0	0	0	0	0	0	0	0	0	0	0	0	0	0	1	0	1	0	0	0	1	0	0	1	0	0	0	0	0	0	0	1	0	0	0	0	0	0	0	0	2	0	0	0
2410002F23Rik	389.229	134	458	304	429	555	637	171	422	161	417	700	566	399	503	274	134	381	187	239	275	340	368	723	757	575	257	294	313	421	369	366	299	278	263	405	328	369	253	294	284	459	298	880	438	419	201	653	324
2410003L11Rik	15.4792	2	26	15	12	22	37	11	9	10	12	16	9	10	17	10	10	21	14	6	3	12	29	32	15	2	11	13	17	23	27	27	12	12	8	11	5	3	9	13	14	24	23	56	23	11	10	22	5
2410004B18Rik	143.208	60	167	148	170	202	206	60	169	68	156	138	179	121	197	146	83	136	60	69	133	161	162	253	244	176	74	106	136	159	121	149	118	117	129	135	112	148	83	100	107	165	114	334	178	182	106	207	102
2410004I01Rik	0.4375	0	0	0	0	0	1	1	0	0	0	0	0	0	0	0	0	0	0	1	0	0	0	1	1	0	0	1	0	0	0	1	0	0	1	0	0	1	0	0	0	0	2	5	0	2	0	0	1
2410004P03Rik	0.770833	0	0	0	0	0	0	0	0	3	0	3	5	0	0	0	1	0	0	3	0	0	1	2	1	0	0	0	0	0	0	2	3	2	1	1	1	0	2	0	1	0	0	0	3	1	0	1	0
2410006H16Rik	91.4792	30	100	73	81	96	138	30	159	53	103	106	145	122	158	66	32	71	47	45	87	74	87	121	123	296	68	70	95	101	89	89	90	75	48	86	50	80	65	73	89	102	48	158	103	111	40	115	68
2410012E07Rik	0.0416667	0	0	0	0	0	0	0	0	0	0	0	0	0	0	0	0	0	0	0	1	0	0	0	0	0	0	0	0	0	0	0	0	0	0	0	0	0	0	0	0	0	1	0	0	0	0	0	0
2410015M20Rik	1229.02	456	1333	1381	1582	1630	1756	456	1707	549	1569	1041	1337	1293	1599	1150	623	1025	570	738	933	1122	1442	2177	2119	867	885	963	1240	1415	1277	1243	882	1082	988	1160	1028	1163	964	897	1001	1486	856	2806	1520	1654	790	1854	953
2410016O06Rik	125.542	48	126	108	112	199	149	48	143	50	96	81	107	113	198	114	55	124	53	76	131	137	154	207	161	191	85	84	147	170	128	121	112	106	118	142	111	133	90	105	112	118	104	380	132	161	95	184	89
2410017I17Rik	0.583333	0	0	0	2	0	0	0	2	0	1	3	1	0	1	0	0	0	0	0	2	1	4	1	3	1	0	0	0	0	0	0	3	0	0	0	0	0	0	0	0	0	0	0	0	2	0	1	0
2410018L13Rik	33.0208	7	20	21	22	50	39	14	46	10	30	31	32	46	60	20	16	37	15	32	26	42	31	58	55	42	7	20	23	40	52	41	19	31	24	51	40	48	25	21	12	38	30	65	43	33	14	55	22
2410021H03Rik	0.166667	0	0	0	0	1	0	0	0	1	0	0	0	0	0	0	0	0	0	0	0	1	0	0	0	0	0	0	0	1	0	0	1	0	0	0	2	0	0	0	0	1	0	0	0	0	0	0	0
2410089E03Rik	232.5	93	248	211	248	304	286	93	304	147	214	316	238	249	377	254	136	308	99	160	192	215	240	416	380	244	139	178	188	225	208	260	193	245	165	237	174	170	197	228	246	261	193	577	256	272	115	286	154
2410124H12Rik	0.0416667	0	0	0	0	0	0	0	0	0	0	0	0	0	0	0	0	0	0	0	0	0	0	0	0	0	0	0	0	0	0	0	0	0	0	0	0	0	0	0	0	0	0	1	0	1	0	0	0
2410127L17Rik	325.021	120	474	254	424	356	439	142	370	178	307	120	175	310	524	368	186	325	163	216	189	396	342	503	451	264	232	276	370	410	398	396	301	361	321	362	269	327	280	314	371	408	225	711	357	422	216	415	190
2410131K14Rik	154	48	162	132	200	202	166	70	167	90	127	48	109	125	294	188	74	129	80	122	157	130	178	268	218	86	104	139	163	152	186	182	172	190	146	209	105	133	166	153	167	226	130	394	185	183	66	136	111
2410137M14Rik	0.0625	0	0	0	0	0	1	0	0	0	0	0	0	0	0	0	0	0	0	0	0	0	0	0	0	1	0	0	0	0	0	0	0	0	0	0	0	0	0	0	0	0	0	0	0	1	0	0	0
2410141K09Rik	0.104167	0	0	0	0	0	0	0	0	0	0	0	1	0	0	0	0	1	0	0	0	0	0	0	0	0	0	0	0	0	0	0	1	0	0	0	0	0	0	0	0	0	1	0	0	0	0	0	1
2500002B13Rik	81.6458	26	123	104	121	63	77	27	133	49	101	64	60	82	151	114	43	51	28	46	57	89	147	96	98	26	75	107	121	86	60	78	55	92	80	61	52	44	81	84	82	81	50	153	132	121	69	117	36
2500004C02Rik	75.7292	22	100	47	60	67	111	22	98	52	118	126	110	69	101	59	32	78	36	69	44	72	62	130	129	55	36	64	50	81	93	94	57	74	67	66	55	71	53	64	65	106	54	196	87	86	51	117	51
2510002D24Rik	256.021	94	291	269	426	308	315	110	316	123	284	380	285	222	374	214	124	198	94	105	229	246	364	424	417	306	205	276	350	257	259	202	241	274	285	205	202	212	154	186	231	227	146	510	272	311	163	343	194
2510003B16Rik	1.33333	0	0	1	0	3	2	1	0	0	0	0	3	3	0	2	0	1	0	0	1	0	0	3	7	2	0	1	2	1	2	1	0	2	0	5	2	3	1	0	0	3	2	1	3	1	2	2	0
2510009E07Rik	480.604	198	616	450	630	489	577	198	559	282	422	255	305	379	883	533	286	569	273	300	402	624	533	710	550	547	349	464	459	511	514	526	427	551	441	572	419	413	468	481	539	552	315	972	613	671	282	617	282
2510039O18Rik	967.625	368	779	1025	1287	1678	1408	440	1336	368	785	658	785	1041	1338	832	421	850	444	538	895	853	1211	1603	1567	1296	651	759	892	968	1058	987	785	1078	892	1067	939	986	693	691	762	1087	645	2228	1190	1231	618	1377	769
2610001J05Rik	480.979	200	618	416	593	487	672	227	600	218	652	461	481	466	621	412	224	396	200	297	302	460	555	884	810	485	349	454	436	528	568	564	393	439	395	535	406	440	380	349	435	524	358	1039	611	584	293	724	405
2610002M06Rik	252.771	102	384	205	276	238	314	102	254	154	265	137	150	187	345	287	129	291	153	189	151	328	283	478	339	292	140	215	227	267	275	348	267	307	234	277	227	233	225	261	287	309	194	546	316	345	171	277	152
2610005L07Rik	606.583	216	653	517	687	734	782	216	718	332	754	598	449	522	984	615	343	828	303	474	478	709	632	955	835	447	316	471	458	520	572	695	659	700	446	555	415	471	612	651	605	881	552	1759	723	810	392	716	338
2610008E11Rik	193.667	83	203	143	203	214	226	83	179	104	220	237	185	146	285	174	85	196	109	153	136	180	188	325	346	241	110	154	147	201	230	260	220	198	162	191	150	160	156	164	161	249	173	510	258	211	140	285	131
2610015P09Rik	190.5	79	182	148	205	216	238	86	184	94	246	486	315	197	237	164	79	177	91	141	124	183	201	327	373	179	116	141	171	211	196	199	166	168	146	168	167	167	133	149	122	222	164	423	234	244	94	259	111
2610016A17Rik	9.0625	2	9	2	8	11	11	3	13	4	13	6	4	13	11	5	2	8	3	10	8	10	13	12	35	10	4	9	9	3	14	9	2	10	5	8	13	4	5	5	4	21	14	20	14	4	5	12	9
2610020C07Rik	9.39583	1	3	10	9	13	11	3	18	6	13	10	26	8	3	2	1	11	8	9	3	5	4	20	32	11	5	7	6	5	20	9	11	3	10	15	9	11	6	5	8	12	9	20	11	10	4	8	6
2610020H08Rik	41.875	9	68	45	64	24	59	10	73	48	44	58	19	30	73	45	21	22	18	25	46	54	31	42	52	61	30	54	64	32	32	31	64	58	54	9	26	21	41	54	41	27	27	82	63	67	27	45	14
2610027K06Rik	28.5625	9	23	26	21	41	56	20	31	9	29	43	52	28	36	25	11	30	19	19	23	16	25	47	48	30	22	22	14	28	30	38	18	22	23	29	28	25	24	15	20	42	22	72	39	30	17	46	18
2610028E06Rik	0.1875	0	0	0	0	0	0	0	0	0	0	0	0	0	0	0	0	1	0	0	0	3	1	0	0	1	0	0	0	0	0	0	0	0	0	0	0	0	0	1	0	0	0	2	0	0	0	0	0
2610028H24Rik	1.22917	0	1	1	2	2	3	1	0	0	0	0	5	0	1	3	0	2	0	1	2	3	6	1	1	0	0	2	1	0	0	0	0	0	2	2	0	1	2	0	1	2	0	1	2	5	0	3	0
2610035D17Rik	90.0208	30	84	57	68	159	130	65	83	30	102	46	55	100	153	34	32	43	37	72	48	91	78	135	222	100	67	100	102	90	111	61	63	54	63	85	103	127	69	68	67	130	68	265	146	83	67	192	55
2610035F20Rik	0.0625	0	0	0	0	0	0	0	0	0	0	0	0	0	0	0	0	0	0	0	0	0	0	0	0	0	0	0	0	0	0	0	0	0	0	0	0	0	0	0	0	1	0	2	0	0	0	0	0
2610037D02Rik	0.479167	0	0	0	0	3	0	0	2	0	0	0	3	0	0	0	0	0	0	0	0	0	0	0	0	1	0	0	0	0	1	1	2	0	0	0	0	0	1	1	1	1	0	1	0	0	0	5	0
2610042L04Rik	4.14583	0	1	3	3	3	3	1	3	4	6	8	10	3	6	2	0	2	2	2	5	8	6	6	2	20	0	3	6	3	3	5	2	7	7	5	2	2	2	8	3	3	2	2	7	5	1	6	3
2610044O15Rik8	72.6875	26	75	59	58	60	95	40	70	26	80	52	57	64	125	62	42	72	27	42	56	64	84	109	87	73	41	74	86	99	87	86	70	73	59	82	72	63	63	74	84	107	54	184	99	96	43	100	68
2610100L16Rik	0.645833	0	0	0	0	0	0	0	0	0	0	0	0	0	0	2	1	0	0	0	2	4	3	0	0	0	0	0	0	0	0	0	5	1	0	0	0	2	1	2	0	0	0	0	3	5	0	0	0
2610203C22Rik	15.5	5	21	14	22	20	23	6	18	17	15	23	17	16	16	22	13	15	8	12	11	19	29	21	27	14	10	9	5	10	15	20	10	16	7	15	11	20	9	14	12	19	9	25	14	13	15	26	15
2610206C17Rik	40.125	13	40	45	48	57	71	14	80	19	49	13	18	61	61	37	17	32	15	17	54	30	40	68	51	36	23	37	35	44	41	39	42	38	34	36	30	31	38	29	24	54	27	83	66	54	27	72	20
2610301B20Rik	164.375	65	247	128	229	173	253	77	186	85	180	142	156	117	231	142	65	152	74	99	101	182	140	231	186	148	136	164	202	197	177	192	158	167	163	205	127	149	98	146	168	223	118	349	227	219	112	248	134
2610305D13Rik	24.8542	5	38	19	18	19	41	7	29	19	39	56	29	14	46	19	5	33	14	11	11	22	26	35	29	32	9	19	16	25	33	37	21	17	16	28	22	26	21	13	22	24	9	65	31	39	5	48	24
2610306M01Rik	65.5833	19	69	80	92	91	86	41	86	32	82	107	63	56	93	49	34	40	19	46	54	53	74	133	113	55	49	56	45	74	73	53	42	59	48	68	44	63	46	28	37	88	51	146	71	80	44	127	59
2610307P16Rik	20.4167	3	15	17	25	30	38	12	23	3	35	25	26	31	17	19	3	27	7	13	13	15	8	39	27	42	13	13	13	20	19	23	20	13	15	17	17	15	13	13	16	22	18	49	20	24	15	38	23
2610316D01Rik	0.0625	0	0	0	0	0	0	0	0	0	0	0	0	0	0	0	0	0	1	0	0	0	0	0	0	0	0	0	0	0	0	0	0	0	0	0	0	0	0	1	0	0	0	0	1	0	0	0	0
2610318N02Rik	1.25	0	0	0	0	1	2	0	0	0	0	1	4	1	0	0	0	6	1	2	3	3	1	5	1	15	0	0	0	0	0	1	2	0	0	1	1	1	0	0	0	1	0	4	1	0	0	2	0
2610507B11Rik	4779.23	2093	5471	4796	5882	5654	6039	2093	5477	2936	4617	2919	2827	3680	8952	5507	2956	5985	2605	3660	3479	5334	5200	7316	6818	2723	3303	4305	4890	4920	5198	5460	4972	6050	4143	5339	3718	4509	4414	5112	5071	6327	3717	11147	4923	5711	2680	5523	2715
2610507I01Rik	296.854	116	311	242	265	316	368	116	349	140	405	293	357	266	386	257	157	319	156	215	209	251	383	462	491	240	195	215	249	354	374	305	277	296	228	306	283	283	247	248	242	481	241	755	312	311	212	470	228
2610524H06Rik	31.0625	5	18	20	32	48	35	13	33	16	57	61	34	33	34	15	5	23	10	24	12	39	20	43	42	80	20	31	23	39	30	49	27	19	17	35	23	24	24	22	25	53	17	73	41	46	17	52	18
2610528A11Rik	1.625	0	0	1	6	1	0	0	2	0	7	1	2	3	0	1	0	0	0	0	3	4	1	2	0	1	2	0	0	3	1	0	2	1	0	3	3	3	1	1	2	2	1	4	2	0	1	4	4
2610528J11Rik	703.208	268	813	976	1101	966	875	277	1100	341	734	581	677	685	1163	665	424	434	292	276	746	801	987	871	948	268	614	710	754	726	764	582	585	862	760	532	661	562	549	616	655	609	362	1329	1049	981	510	1017	476
2700029M09Rik	210.458	68	225	172	282	247	272	68	236	98	268	193	186	205	243	159	106	185	107	136	146	211	269	358	337	296	128	161	206	273	223	233	174	190	155	225	174	236	155	162	179	263	159	459	256	287	155	339	172
2700038G22Rik	21.9792	8	14	17	17	30	35	16	24	16	20	46	36	18	38	22	8	14	20	13	12	22	26	37	26	39	8	17	23	18	21	19	14	21	22	14	24	10	31	19	24	32	20	47	30	18	8	21	16
2700046A07Rik	1.39583	0	0	2	1	7	1	0	0	0	2	0	0	0	3	1	0	0	2	0	1	0	2	5	1	2	0	4	4	0	4	1	2	0	0	0	0	0	0	0	0	1	1	8	1	2	1	2	5
2700046G09Rik	58.8125	21	74	72	70	103	78	21	77	21	84	62	90	54	83	56	21	56	33	42	41	63	57	96	95	29	42	54	60	59	76	55	36	42	45	56	38	43	44	40	51	65	44	127	64	80	32	98	49
2700049A03Rik	96.6042	32	101	82	113	96	108	39	119	65	103	39	55	90	203	99	60	94	32	72	69	95	124	138	127	78	69	71	87	76	115	131	114	164	107	88	70	87	108	117	112	124	74	219	122	123	46	105	58
2700054A10Rik	22.9167	7	24	22	22	32	21	7	22	7	22	10	37	20	44	11	11	25	8	13	19	31	25	26	30	24	14	21	22	36	25	20	26	30	13	18	18	24	16	22	23	31	16	60	27	39	21	27	23
2700060E02Rik	969.375	428	1384	861	1198	1067	1337	467	1194	614	1083	739	811	965	1590	941	428	975	479	597	689	843	1137	1665	1445	1183	650	898	989	1121	1060	1093	802	1025	906	1056	858	1069	693	758	912	1027	609	1935	1149	1152	539	1333	635
2700062C07Rik	120.792	61	124	95	146	124	163	61	130	77	134	126	144	122	214	102	61	130	70	61	81	123	163	187	174	135	85	110	110	135	129	129	95	96	124	118	92	141	103	84	101	130	75	266	141	158	82	178	100
2700069I18Rik	0	0	0	0	0	0	0	0	0	0	0	0	0	0	0	0	0	0	0	0	0	0	0	0	0	0	0	0	0	0	0	0	0	0	0	0	0	0	0	0	0	0	0	0	0	0	0	0	0
2700070H01Rik	1.25	0	0	1	1	3	3	0	0	0	0	3	3	0	2	0	0	0	0	2	1	0	0	2	2	0	1	2	1	2	0	1	1	1	1	2	1	0	0	1	0	1	0	5	3	3	1	6	4
2700081O15Rik	252.646	87	186	241	258	404	377	87	289	90	279	354	269	229	349	215	133	281	167	186	237	164	266	478	391	459	118	156	154	243	309	311	192	194	145	306	231	230	235	217	222	240	213	622	275	282	152	329	207
2700089I24Rik	0.104167	0	0	0	0	0	0	0	0	0	0	0	0	0	0	1	1	1	0	1	0	0	0	1	0	0	0	0	0	0	0	0	0	0	0	0	0	0	0	0	0	0	0	0	0	0	0	0	0
2700094K13Rik	108.812	33	99	99	104	132	129	42	147	33	123	126	124	107	145	86	50	91	67	63	75	55	144	200	194	283	80	86	101	123	115	117	103	68	64	103	90	102	76	68	89	133	63	254	135	143	51	180	85
2700097O09Rik	76	28	64	67	110	69	101	34	95	28	78	73	61	70	110	60	31	96	53	52	50	63	84	112	143	75	44	64	90	101	83	72	92	97	63	78	65	66	63	61	74	91	68	157	94	88	48	111	51
2700099C18Rik	4.41667	0	4	3	1	3	11	1	1	1	7	3	3	10	1	4	0	4	0	3	5	6	10	3	2	30	3	2	1	2	1	5	3	3	4	5	0	5	0	5	3	8	2	14	5	7	3	11	3
2810001G20Rik	52.6875	19	82	37	56	85	74	26	50	26	61	59	68	40	54	41	19	41	22	33	55	47	38	108	96	55	29	42	48	86	59	58	43	46	38	60	37	52	25	48	45	57	38	127	54	54	39	101	34
2810002D19Rik	52.9792	21	61	30	58	53	89	26	51	25	58	23	61	43	73	42	21	43	37	30	33	46	70	114	83	51	30	49	47	57	54	73	51	48	51	57	55	57	39	62	55	59	50	140	70	60	32	66	35
2810004N23Rik	319.938	128	391	365	456	372	495	128	458	165	252	179	260	255	488	347	174	287	182	202	222	358	394	557	481	316	255	282	325	333	320	337	298	307	291	324	237	305	241	287	283	332	234	724	390	415	206	449	218
2810006K23Rik	112.896	55	140	93	142	133	160	62	150	56	88	58	97	110	189	133	57	125	55	70	73	97	115	190	159	111	73	134	109	124	131	149	91	125	101	125	92	119	91	104	102	145	91	208	131	141	62	144	80
2810013P06Rik	252.188	95	263	244	256	284	371	95	347	131	219	355	303	240	374	216	116	243	129	159	198	227	317	413	378	144	198	246	223	256	276	294	209	198	241	270	220	217	176	198	228	333	201	566	316	357	171	372	188
2810021J22Rik	116.271	55	130	78	108	131	147	55	155	61	126	120	103	66	219	109	60	140	77	97	84	103	156	201	158	84	122	75	90	148	132	121	88	146	83	115	78	100	102	125	110	163	118	309	150	134	58	124	59
2810025M15Rik	200.188	86	260	201	259	269	310	91	240	86	294	286	264	237	259	150	97	166	103	116	160	149	223	312	325	192	102	163	168	216	198	191	128	175	165	175	169	182	128	160	153	221	131	471	240	245	135	318	167
2810029C07Rik	108.125	46	155	98	205	94	162	51	113	76	130	211	169	124	189	90	50	83	47	46	71	104	95	197	139	70	100	90	125	86	110	105	110	81	118	99	72	90	60	76	76	98	64	199	151	131	64	141	93
2810032G03Rik	8.66667	0	5	0	2	10	22	0	1	0	18	8	15	9	1	0	1	18	7	5	0	2	2	15	21	4	0	1	1	9	12	17	3	1	0	23	9	23	2	1	5	18	19	44	1	4	0	31	12
2810047C21Rik1	18.1458	3	3	10	20	25	18	6	22	14	11	21	16	12	32	16	12	11	12	20	14	33	10	41	23	34	7	13	8	10	14	10	22	18	23	25	26	24	11	15	12	14	11	48	25	22	9	33	20
2810049E08Rik	0.270833	0	0	1	0	0	1	0	0	0	0	0	0	0	0	0	0	0	0	0	2	0	0	0	0	0	0	0	0	0	2	0	0	1	0	0	0	0	0	0	1	0	0	2	0	0	1	2	0
2810403A07Rik	943.625	388	1091	710	1117	964	1249	388	1226	504	1092	1126	882	895	1426	903	515	1029	506	635	588	1033	1100	1615	1773	1005	602	719	793	990	926	1032	894	953	716	936	780	887	746	800	893	1141	769	2057	1139	1186	631	1182	631
2810403D21Rik	10.4792	0	27	8	7	7	12	3	18	1	10	4	5	6	34	10	4	6	0	6	6	27	12	16	17	8	7	8	6	9	7	13	8	7	4	4	11	4	11	7	12	29	11	23	15	15	7	15	4
2810404M03Rik	0	0	0	0	0	0	0	0	0	0	0	0	0	0	0	0	0	0	0	0	0	0	0	0	0	0	0	0	0	0	0	0	0	0	0	0	0	0	0	0	0	0	0	0	0	0	0	0	0
2810405F15Rik	3.6875	0	0	3	1	2	6	2	7	0	8	1	8	4	7	4	2	7	0	1	3	3	6	6	5	15	2	6	1	2	5	3	4	1	4	4	6	1	2	2	3	2	5	2	3	3	1	4	7
2810408A11Rik	19.75	4	30	25	31	29	24	8	23	4	20	16	33	13	63	17	7	12	8	16	13	22	29	23	30	17	15	13	24	21	16	24	16	12	10	12	19	12	19	20	18	26	7	29	30	24	8	39	10
2810408I11Rik	7.20833	0	23	8	11	10	9	1	21	1	9	16	0	3	17	10	0	0	0	4	11	7	7	8	5	5	6	9	10	5	1	3	0	10	13	4	6	5	10	3	3	7	3	10	9	26	8	4	3
2810410L24Rik	84.3125	20	87	71	65	107	115	48	102	44	140	144	126	109	88	57	20	79	45	65	46	74	113	152	141	64	56	48	44	104	100	81	61	61	52	99	67	90	49	74	49	102	50	185	112	85	67	149	84
2810417H13Rik	25.6458	5	11	9	10	19	37	7	19	5	16	50	43	18	33	14	12	29	22	17	18	14	21	46	28	258	10	19	14	14	13	22	38	13	23	27	23	25	15	18	19	24	14	36	22	15	23	20	14
2810428I15Rik	354.812	130	342	454	416	509	423	145	430	174	480	549	532	360	484	349	194	257	130	182	325	290	423	677	680	414	225	256	350	371	382	315	257	338	299	327	315	378	219	236	249	353	211	655	443	394	194	533	262
2810429I04Rik	2.375	0	6	1	5	5	1	0	2	0	2	4	2	1	5	3	2	3	0	2	1	5	2	0	0	6	0	3	1	2	4	1	1	0	1	4	2	3	1	0	1	1	1	5	8	1	1	7	4
2810433D01Rik	9.14583	0	0	1	10	14	16	6	9	3	7	20	9	12	15	4	2	19	4	5	5	3	7	21	11	6	1	7	3	12	8	18	11	15	6	15	7	14	4	7	10	3	7	32	18	8	4	8	8
2810442N19Rik	0.229167	0	0	0	0	0	1	0	0	0	0	2	0	0	3	0	0	1	0	0	0	0	0	0	0	0	0	0	0	1	0	0	1	0	0	0	0	0	1	0	0	1	0	0	0	0	0	0	0
2810454H06Rik	16.3958	5	34	13	18	23	16	6	7	11	25	19	18	26	23	19	7	23	15	10	17	22	22	14	30	17	8	7	11	17	26	16	11	20	10	18	13	10	9	13	7	28	7	37	17	16	5	29	11
2810459M11Rik	8.45833	0	34	15	30	2	6	2	19	1	8	0	3	1	9	5	1	1	1	2	10	23	12	7	2	8	19	17	18	7	4	4	8	15	12	7	6	5	10	12	13	5	1	6	4	10	3	10	5
2810468N07Rik	3.16667	0	3	1	0	3	2	1	5	1	6	3	6	3	3	5	3	4	1	0	3	1	4	5	7	22	2	2	0	1	4	2	8	1	3	2	3	1	4	1	1	2	0	12	1	4	0	2	1
2810471M01Rik	0.0625	0	0	0	0	0	0	0	0	0	0	0	1	0	0	0	0	0	0	0	0	0	0	0	1	0	0	0	0	0	0	0	0	0	0	0	0	0	0	0	0	0	0	0	1	0	0	0	0
2810474O19Rik	642.938	251	477	321	653	553	650	264	566	571	766	1076	787	499	991	740	585	807	399	398	439	922	902	1007	1184	1067	304	321	420	426	603	820	652	724	334	524	369	486	423	628	672	1019	648	1890	506	878	283	687	369
2900005J15Rik	75.9792	29	74	68	75	88	84	32	103	42	111	136	100	72	90	60	35	70	29	45	78	57	72	92	90	45	50	57	68	65	88	78	77	70	60	94	54	54	56	73	65	102	40	188	106	85	60	178	85
2900008C10Rik	5.375	0	4	4	4	8	5	1	3	5	4	2	7	9	8	5	1	9	3	5	1	3	4	16	6	21	2	7	2	10	2	4	3	3	0	6	5	6	2	0	5	9	5	11	5	7	4	8	11
2900009J06Rik	1.72917	0	1	0	3	2	6	1	2	0	3	0	1	0	2	1	1	5	0	0	0	1	0	3	4	2	1	6	2	2	1	3	1	1	1	2	0	2	1	2	3	2	0	2	5	0	2	3	3
2900011O08Rik	4.3125	0	1	3	0	4	9	0	3	0	0	12	3	1	2	1	0	2	2	2	3	5	2	8	6	6	0	3	2	12	5	4	1	0	2	41	1	5	1	1	0	2	3	13	0	2	2	10	18
2900026A02Rik	527.271	242	592	498	640	669	599	242	752	319	512	335	307	442	843	512	319	580	400	376	411	474	700	951	781	660	324	532	535	439	567	561	512	614	460	541	460	463	385	494	475	623	391	1167	622	673	286	655	341
2900041M22Rik	3.39583	0	1	2	1	5	7	0	4	1	3	0	4	5	6	3	0	7	7	1	0	1	0	10	15	4	1	3	0	2	4	3	2	2	2	3	1	3	4	4	0	4	5	13	5	5	1	3	4
2900052N01Rik	0.416667	0	0	0	0	0	0	1	0	0	0	0	0	0	0	0	0	0	0	0	0	0	0	0	6	3	0	0	0	2	0	0	3	0	0	0	1	0	0	0	1	0	1	1	0	0	0	0	1
2900055J20Rik	6.6875	0	6	0	2	0	9	0	0	2	10	10	4	3	9	6	1	6	6	5	3	7	15	12	15	3	7	6	6	9	7	5	6	3	8	7	5	4	5	6	1	13	1	19	9	15	9	18	8
2900057B20Rik	0.0625	0	0	0	0	0	0	0	0	0	0	0	0	0	1	0	0	0	0	0	0	0	0	0	0	0	0	0	0	0	0	0	1	0	0	0	1	0	0	0	0	0	0	0	0	0	0	0	0
2900060B14Rik	0.5	0	0	0	0	1	1	0	0	0	2	3	0	1	1	0	0	0	0	0	0	0	3	1	0	0	0	1	1	0	0	0	1	0	0	0	0	0	0	1	0	0	0	2	1	3	1	0	0
2900076A07Rik	46.0833	16	43	39	52	62	73	19	45	20	61	71	49	32	64	38	16	43	26	26	32	41	61	78	75	43	31	40	37	50	29	62	43	35	36	38	38	35	35	38	50	52	43	113	64	70	34	73	30
2900079G21Rik	0	0	0	0	0	0	0	0	0	0	0	0	0	0	0	0	0	0	0	0	0	0	0	0	0	0	0	0	0	0	0	0	0	0	0	0	0	0	0	0	0	0	0	0	0	0	0	0	0
2900092C05Rik	0.0416667	0	0	0	0	0	0	0	0	0	0	0	0	0	0	0	0	0	2	0	0	0	0	0	0	0	0	0	0	0	0	0	0	0	0	0	0	0	0	0	0	0	0	0	0	0	0	0	0
2900092D14Rik	212.5	76	194	116	207	254	305	100	141	101	246	162	248	189	206	155	76	271	120	201	105	242	201	431	339	98	118	127	162	307	259	307	171	116	153	325	136	226	134	151	152	412	211	607	220	237	151	441	240
2900097C17Rik	2843.5	1039	3043	2410	3369	3338	3501	1039	3860	1373	2487	1411	1647	2427	4285	2791	1599	2659	1400	1795	2087	3266	3365	4491	3950	3296	2011	2677	2740	3035	2875	3373	2989	3455	2524	3117	2442	2761	2676	2951	2970	3620	2292	6748	3570	3885	1920	3750	1668
3000002C10Rik	37.8333	9	44	48	40	62	42	21	48	9	44	62	65	34	34	24	15	25	14	15	38	37	37	59	54	32	26	23	30	36	44	42	18	30	32	34	34	34	18	33	26	50	24	119	57	59	19	66	36
3010001F23Rik	3.14583	0	3	1	4	5	12	4	3	0	0	8	4	2	1	1	0	5	2	1	2	6	0	4	5	7	1	0	6	6	4	5	6	1	1	1	3	3	2	1	2	3	0	4	1	4	2	8	6
3010026O09Rik	147.979	48	291	236	272	149	149	81	240	76	192	115	149	141	252	126	100	133	54	48	146	162	201	131	238	58	135	196	197	177	158	132	92	132	170	88	107	107	129	114	159	130	72	233	213	208	84	175	72
3100003L05Rik	0.104167	0	0	0	3	0	0	0	0	0	0	0	0	0	0	0	0	0	0	0	0	0	0	0	0	0	0	0	0	0	0	0	0	0	0	0	0	0	0	0	0	0	0	0	1	1	0	0	0
3110001I22Rik	19.5417	4	23	13	16	24	33	5	20	10	31	22	15	16	22	16	9	10	4	14	12	18	27	27	26	31	11	10	15	18	21	23	18	21	17	18	20	16	19	23	22	35	25	61	19	30	5	19	14
3110002H16Rik	239.625	111	270	223	287	286	390	117	303	131	262	209	199	235	374	202	135	242	111	117	137	208	232	416	389	284	179	217	240	252	325	290	218	250	191	242	230	245	191	216	240	281	165	482	248	293	126	320	168
3110009E18Rik	13.8125	2	19	16	19	13	12	6	14	11	16	7	20	10	18	14	6	14	14	2	11	9	15	21	15	18	11	9	15	20	19	24	15	20	11	10	8	15	11	9	10	11	8	35	15	20	4	20	11
3110009F21Rik	0.145833	0	0	0	0	0	0	0	0	0	0	0	0	0	0	0	0	1	0	0	0	0	0	0	3	0	0	0	1	0	0	0	0	0	0	1	0	0	0	0	0	0	0	0	0	0	0	0	1
3110015C05Rik	0.145833	0	0	0	0	0	0	0	0	0	0	0	0	2	0	0	0	0	0	0	0	0	0	0	1	0	0	0	0	0	0	0	0	0	0	0	1	0	0	0	0	0	0	0	0	1	0	2	0
3110021A11Rik	7.54167	2	5	4	7	3	11	6	10	2	12	17	8	7	22	12	6	6	3	6	5	6	6	9	9	5	4	4	6	8	9	7	3	12	9	11	2	5	3	6	6	7	8	14	19	7	3	12	6
3110021N24Rik	24.3125	3	29	33	47	20	23	13	30	15	22	9	15	24	58	37	16	27	10	20	18	14	22	56	42	9	17	22	17	27	29	28	18	33	10	30	12	27	24	39	22	51	15	55	19	27	7	21	3
3110035E14Rik	1.66667	0	5	1	1	1	2	3	0	2	2	5	2	0	0	1	1	1	0	1	2	2	1	4	0	1	2	1	1	2	3	4	0	0	1	4	2	4	0	1	1	2	2	7	0	1	0	1	2
3110039I08Rik	48.1667	12	41	31	45	55	61	19	45	27	63	51	41	38	71	37	22	54	22	48	52	54	53	34	29	211	32	38	32	57	66	64	56	34	30	54	18	29	55	43	65	38	38	115	60	67	24	53	28
3110039M20Rik	0	0	0	0	0	0	0	0	0	0	0	0	0	0	0	0	0	0	0	0	0	0	0	0	0	0	0	0	0	0	0	0	0	0	0	0	0	0	0	0	0	0	0	0	0	0	0	0	0
3110040N11Rik	137.938	55	127	145	219	175	189	68	205	55	144	144	145	117	206	130	58	93	57	82	110	144	181	201	212	148	94	123	149	162	143	124	121	158	136	152	131	156	105	117	122	132	93	277	162	150	83	170	116
3110043O21Rik	146.938	65	167	117	146	156	221	75	137	76	115	117	101	126	230	141	71	167	65	89	109	142	123	242	214	231	94	137	158	178	172	187	158	138	128	161	146	141	93	135	149	178	141	349	171	189	83	219	102
3110045C21Rik	88.125	10	171	131	209	92	112	25	108	57	54	69	73	50	133	109	63	40	26	36	64	126	156	97	57	10	100	136	140	61	74	109	81	93	129	38	51	59	74	90	122	66	53	148	103	155	86	92	59
3110052M02Rik	89.4583	34	80	62	81	69	137	44	68	48	115	114	119	78	135	78	40	115	53	86	55	56	93	200	115	84	34	66	52	93	96	104	90	89	54	119	91	106	60	65	79	126	81	237	99	100	48	142	69
3110056K07Rik	93.0417	37	99	75	71	111	102	37	136	55	124	84	103	60	172	78	60	90	55	68	72	83	84	150	132	67	53	90	85	95	102	122	95	92	96	88	82	60	85	81	108	125	79	244	103	107	68	140	55
3110057O12Rik	168.604	53	308	157	257	194	230	84	230	92	194	129	77	144	279	156	79	192	67	125	114	172	196	245	228	53	108	172	179	162	185	225	123	185	166	168	140	163	156	126	177	237	119	367	220	217	95	206	93
3110062M04Rik	59.0208	23	48	68	57	69	64	36	85	23	74	92	104	61	83	55	37	47	31	34	54	60	61	124	109	62	37	44	57	51	74	64	55	55	30	45	48	58	34	43	41	46	43	133	75	52	33	81	51
3110070M22Rik	8.66667	0	6	6	13	17	16	1	15	0	13	7	14	11	12	2	1	7	7	8	5	3	16	12	12	8	6	8	10	24	4	13	4	6	7	11	9	8	5	9	2	10	9	1	19	9	4	16	5
3110079O15Rik	0.0625	0	0	0	0	0	0	0	0	0	0	0	0	0	0	0	0	0	0	0	0	0	0	0	0	0	0	0	0	0	0	0	0	0	0	3	0	0	0	0	0	0	0	0	0	0	0	0	0
3110082I17Rik	54.4167	10	56	71	60	81	79	21	62	10	63	62	47	51	60	39	21	61	23	39	45	63	60	84	54	101	29	36	42	59	52	53	41	57	54	60	46	47	51	48	50	68	49	120	71	72	34	82	35
3110082J24Rik	0	0	0	0	0	0	0	0	0	0	0	0	0	0	0	0	0	0	0	0	0	0	0	0	0	0	0	0	0	0	0	0	0	0	0	0	0	0	0	0	0	0	0	0	0	0	0	0	0
3110099E03Rik	32.0833	7	33	23	36	56	67	13	31	10	30	38	53	25	47	28	15	51	12	20	28	27	27	59	26	14	14	21	18	34	36	76	7	18	8	53	30	28	16	16	18	58	32	91	29	43	29	42	41
3200001D21Rik	3.29167	0	0	2	3	3	5	0	4	2	0	2	2	2	2	2	6	4	2	3	1	5	7	7	2	2	2	6	2	6	4	4	8	4	3	8	0	3	5	3	6	2	2	8	0	5	2	5	0
3300002I08Rik	4.39583	1	12	6	5	4	1	3	9	5	7	4	1	1	7	8	1	4	1	4	4	2	3	10	3	3	2	3	10	5	6	3	6	4	4	5	2	2	4	6	5	4	3	8	2	6	2	4	4
3300002P13Rik	0.1875	0	0	0	0	0	0	0	0	0	0	0	0	0	0	0	0	0	0	0	0	0	0	0	0	8	0	0	0	0	0	0	0	0	0	0	0	0	0	0	0	0	0	0	0	0	0	0	0
3300005D01Rik	9.83333	1	14	25	11	11	10	5	37	5	12	5	3	7	23	11	4	5	3	7	12	9	8	7	6	6	4	9	18	3	3	13	25	21	4	6	1	7	6	9	7	1	7	12	21	16	8	10	10
3425401B19Rik	0.229167	0	0	0	0	0	0	0	0	0	0	0	0	1	0	0	0	0	0	0	0	0	0	0	0	6	0	0	0	0	0	0	3	0	0	0	0	0	0	0	0	0	0	0	0	0	0	0	1
3632451O06Rik	171.688	64	191	167	204	215	236	90	199	64	176	132	133	169	221	158	87	205	79	112	99	184	166	284	262	107	131	165	222	203	187	228	124	133	161	247	170	185	139	145	151	197	140	382	194	188	80	276	134
3632454L22Rik	1.47917	0	0	0	2	2	0	0	3	3	0	5	0	4	1	1	0	2	3	1	0	1	1	0	8	0	3	0	0	0	0	1	2	1	5	3	0	1	1	0	1	5	0	1	3	1	1	4	0
3830403N18Rik	3.25	0	1	0	0	0	0	0	6	0	9	2	1	3	5	1	0	6	2	0	2	2	4	8	0	15	1	2	19	2	5	1	4	4	3	5	4	0	3	5	1	1	1	10	2	2	1	9	3
3830406C13Rik	404.771	157	627	340	489	405	531	157	467	224	460	301	418	365	566	362	185	405	194	261	268	432	426	667	553	346	290	378	421	455	436	519	362	401	382	385	323	446	302	301	377	526	322	896	523	564	246	558	280
3830408C21Rik	9.97917	2	15	12	8	7	10	3	12	5	9	12	11	14	26	15	2	10	7	6	12	6	6	11	16	11	5	5	7	11	12	10	9	4	8	7	4	9	10	13	15	13	8	21	10	17	5	15	5
3830417A13Rik	0	0	0	0	0	0	0	0	0	0	0	0	0	0	0	0	0	0	0	0	0	0	0	0	0	0	0	0	0	0	0	0	0	0	0	0	0	0	0	0	0	0	0	0	0	0	0	0	0
3830432H09Rik	1.125	0	0	0	1	1	1	0	0	0	3	1	0	1	2	1	0	2	0	0	1	1	2	3	4	0	0	0	1	3	3	2	2	0	0	0	2	2	0	1	2	0	0	2	0	1	1	1	5
3930402G23Rik	0.3125	0	0	0	0	0	0	0	0	0	0	0	0	0	1	1	0	2	1	1	0	0	1	0	0	0	0	0	0	0	1	0	0	0	0	0	0	0	0	0	0	3	0	0	1	0	0	3	0
4430402I18Rik	72.5417	27	74	54	67	76	99	28	65	42	96	48	87	59	105	66	34	68	32	58	60	64	82	91	123	27	64	74	46	123	88	83	59	57	66	59	69	64	63	60	67	87	52	232	87	101	41	120	62
4631405J19Rik	7.27083	1	5	3	9	12	14	5	5	5	10	37	14	8	3	5	4	6	1	11	4	2	1	12	6	11	6	2	7	9	9	9	1	2	7	4	9	4	3	3	4	6	5	12	7	3	9	17	10
4632404H12Rik	91.2083	36	116	89	71	103	124	38	113	49	135	113	75	76	144	80	50	101	36	75	65	136	113	151	138	49	54	82	63	76	100	105	74	90	66	106	91	84	74	75	69	126	72	230	81	109	82	125	68
4632415L05Rik	261.583	96	272	182	257	319	313	96	331	134	263	225	182	226	441	280	162	300	171	230	186	316	246	426	364	198	163	251	259	278	244	344	247	320	208	274	193	237	257	272	266	353	246	609	304	274	186	338	161
4632427E13Rik	4.02083	0	0	4	3	3	4	0	5	7	6	7	2	2	5	3	3	8	1	4	3	5	3	6	14	0	0	3	0	5	5	3	7	8	3	2	5	3	2	5	5	2	6	6	5	5	5	6	2
4632428C04Rik	17.4375	4	17	18	10	17	26	4	30	10	17	16	13	23	20	14	6	29	9	14	20	15	25	28	25	13	5	16	13	11	19	14	13	12	11	37	14	21	11	20	10	28	9	50	18	22	12	23	19
4632428N05Rik	139.062	38	81	94	84	137	98	39	110	47	131	170	149	148	179	105	45	131	93	84	94	130	126	343	192	1259	38	56	63	91	108	120	166	86	55	179	118	128	65	89	87	157	87	241	125	138	69	183	80
4732416N19Rik	0.791667	0	1	0	2	3	1	0	5	0	0	0	0	0	0	5	0	3	1	0	2	0	0	2	0	0	1	2	1	1	1	0	0	0	0	1	1	0	0	0	0	0	1	0	0	2	0	1	0
4732456N10Rik	0	0	0	0	0	0	0	0	0	0	0	0	0	0	0	0	0	0	0	0	0	0	0	0	0	0	0	0	0	0	0	0	0	0	0	0	0	0	0	0	0	0	0	0	0	0	0	0	0
4732471J01Rik	16.5625	1	18	14	8	15	10	1	13	8	25	42	20	15	41	14	9	28	6	7	21	9	18	38	15	11	8	11	13	13	17	9	15	13	18	18	8	16	16	13	14	27	8	54	15	31	14	20	10
4732490B19Rik	0.541667	0	0	0	0	0	1	0	0	1	0	4	0	0	0	0	0	0	0	0	0	0	1	3	3	2	0	0	0	1	2	3	0	0	0	0	0	2	0	0	0	0	1	1	0	0	0	0	0
4732491K20Rik	50.0417	19	76	53	58	44	68	27	42	27	63	55	58	42	67	42	22	47	19	29	43	47	60	104	87	29	40	57	54	71	65	44	46	41	51	52	38	37	34	51	37	48	40	117	59	60	28	63	33
4831407H17Rik	0.0416667	0	0	0	0	0	0	0	1	0	0	0	0	0	0	0	0	0	0	0	1	0	0	0	0	0	0	0	0	0	0	0	0	0	0	0	0	0	0	0	0	0	0	0	0	0	0	0	0
4831440E17Rik	51.875	22	95	39	58	44	52	23	55	42	73	59	72	33	85	55	22	57	22	49	41	35	61	75	69	34	27	53	43	64	56	61	52	43	51	40	39	50	36	43	62	56	36	124	54	63	38	75	38
4833411C07Rik	8.0625	0	0	2	8	5	6	0	20	10	10	23	35	6	5	9	0	12	3	11	3	5	12	14	25	5	3	1	3	8	11	6	2	13	3	6	3	3	5	7	3	18	8	24	9	2	3	11	1
4833412C05Rik	0.395833	0	3	0	0	2	2	0	0	0	0	0	0	0	0	1	0	2	0	0	0	0	2	0	0	2	0	0	0	0	0	1	1	1	0	0	0	0	0	0	0	0	0	1	0	0	0	0	0
4833415N18Rik	1.0625	0	0	0	2	1	3	0	0	0	2	0	2	0	1	0	1	0	2	1	0	6	4	2	1	1	2	1	1	0	0	2	1	1	2	2	0	1	1	1	0	0	0	0	0	2	0	0	4
4833417C18Rik	2.89583	0	0	2	4	2	4	0	3	4	6	9	5	3	2	0	0	5	0	4	1	0	5	9	4	5	1	0	1	5	3	2	4	1	1	3	1	3	4	2	2	2	1	13	6	3	1	2	1
4833418N02Rik	45.5833	12	59	60	64	52	52	25	57	26	61	63	50	32	81	53	12	33	24	21	38	55	60	68	66	33	28	38	40	48	41	56	45	39	33	39	27	41	24	33	47	56	30	96	62	54	32	66	38
4833419F23Rik	2.77083	0	2	1	0	2	3	1	9	0	1	0	1	1	7	2	4	5	3	2	1	0	1	6	9	6	0	1	0	4	4	1	4	1	1	5	2	0	1	1	2	2	3	9	8	3	1	6	3
4833420G17Rik	460.646	183	600	448	616	473	592	183	559	231	621	555	486	410	719	433	229	433	224	261	308	474	535	690	618	388	346	428	422	566	512	508	397	461	405	389	385	361	375	421	507	593	296	943	578	622	252	644	320
4833422C13Rik	10.7292	2	12	14	5	8	16	6	16	18	5	20	11	8	19	13	2	11	12	3	10	11	16	9	7	31	7	7	12	11	10	11	16	12	5	9	10	4	9	10	6	13	4	28	5	16	3	17	4
4833422M21Rik	0.0208333	0	0	0	0	0	0	0	0	0	0	0	0	0	0	0	0	0	0	0	1	0	0	0	0	0	0	0	0	0	0	0	0	0	0	0	0	0	0	0	0	0	0	0	0	0	0	0	0
4833423E24Rik	0.291667	0	0	0	0	0	0	0	0	0	0	0	0	0	0	0	1	0	0	1	0	0	0	0	0	7	0	0	0	0	0	0	2	0	0	0	0	0	0	0	0	0	0	0	2	1	0	0	0
4833427F10Rik	0.166667	0	0	0	0	1	0	0	0	0	0	0	0	0	3	0	0	0	0	0	0	0	0	1	0	0	0	0	0	0	0	0	0	0	0	0	0	0	0	0	0	0	0	0	0	0	0	3	0
4833427G06Rik	0.0625	0	0	0	0	0	0	0	0	0	0	0	2	0	0	0	0	0	0	0	0	0	0	0	0	0	0	0	0	0	0	0	0	0	0	0	0	0	0	0	0	1	0	0	0	0	0	0	0
4833428L15Rik	0.604167	0	1	2	0	0	0	0	0	0	0	0	2	1	1	0	0	1	1	0	1	0	1	2	2	0	0	1	2	0	0	0	0	0	1	0	0	2	0	1	0	0	0	2	1	0	0	2	1
4833439L19Rik	11974.7	3737	16511	12608	16716	12566	13021	4758	16979	7500	10348	3737	5676	10314	21415	13436	6987	10042	4854	6496	9884	14108	16552	16133	15685	4400	9855	12330	15434	13800	13146	12678	10514	15652	14218	12634	11353	12417	10332	11235	12741	13075	7307	23172	15530	18474	7693	15555	7043
4921501E09Rik	0	0	0	0	0	0	0	0	0	0	0	0	0	0	0	0	0	0	0	0	0	0	0	0	0	0	0	0	0	0	0	0	0	0	0	0	0	0	0	0	0	0	0	0	0	0	0	0	0
4921504A21Rik	17.375	3	13	27	22	20	18	3	13	6	32	6	10	13	26	21	12	11	10	10	10	9	13	31	26	5	12	13	13	21	13	20	28	21	14	32	14	17	20	14	23	34	13	36	24	16	13	33	15
4921504E06Rik	0.416667	0	0	0	0	0	0	0	0	0	0	0	0	0	0	1	0	0	0	0	0	1	0	1	6	0	0	0	0	0	0	2	0	1	0	0	1	0	0	0	0	1	1	2	1	0	0	2	0
4921506M07Rik	0.270833	0	0	2	0	0	0	0	0	0	0	0	0	0	0	0	1	1	0	0	0	0	0	0	0	8	0	0	0	0	0	0	0	0	0	0	0	0	0	0	0	0	0	1	0	0	0	0	0
4921507L20Rik	10.0833	3	13	6	16	8	14	3	13	11	16	4	5	7	24	13	3	8	8	10	6	8	4	10	26	6	8	10	5	8	17	7	12	7	10	12	4	11	7	11	8	14	9	26	6	13	5	22	6
4921507P07Rik	12.8958	3	16	5	8	20	16	10	11	4	17	15	15	17	15	10	4	13	10	3	11	14	15	23	14	14	5	13	11	9	18	6	15	14	17	15	17	8	9	8	19	19	4	28	8	15	9	28	7
4921508D12Rik	0	0	0	0	0	0	0	0	0	0	0	0	0	0	0	0	0	0	0	0	0	0	0	0	0	0	0	0	0	0	0	0	0	0	0	0	0	0	0	0	0	0	0	0	0	0	0	0	0
4921509C19Rik	0.0625	0	0	0	0	0	0	0	0	0	0	0	0	0	0	2	0	0	0	0	0	0	0	0	0	0	0	0	0	1	0	0	0	0	0	0	0	0	0	0	0	0	0	0	0	0	0	0	0
4921509O07Rik	0.0208333	0	0	0	0	0	0	0	0	0	0	0	0	0	0	1	0	0	0	0	0	0	0	0	0	0	0	0	0	0	0	0	0	0	0	0	0	0	0	0	0	0	0	0	0	0	0	0	0
4921511C10Rik	0.8125	0	0	0	1	0	3	2	0	0	0	0	1	2	0	1	0	0	1	0	1	3	1	2	1	2	1	1	2	1	1	1	2	0	0	0	0	1	2	2	0	0	0	1	1	1	0	0	1
4921511C20Rik	0	0	0	0	0	0	0	0	0	0	0	0	0	0	0	0	0	0	0	0	0	0	0	0	0	0	0	0	0	0	0	0	0	0	0	0	0	0	0	0	0	0	0	0	0	0	0	0	0
4921511H03Rik	0	0	0	0	0	0	0	0	0	0	0	0	0	0	0	0	0	0	0	0	0	0	0	0	0	0	0	0	0	0	0	0	0	0	0	0	0	0	0	0	0	0	0	0	0	0	0	0	0
4921511I17Rik	0.0833333	0	0	0	0	0	0	0	0	0	0	0	0	0	0	0	1	0	0	0	0	0	0	0	0	0	0	0	0	0	0	0	1	0	0	1	1	0	0	0	0	0	0	0	0	0	0	0	0
4921511M17Rik	0	0	0	0	0	0	0	0	0	0	0	0	0	0	0	0	0	0	0	0	0	0	0	0	0	0	0	0	0	0	0	0	0	0	0	0	0	0	0	0	0	0	0	0	0	0	0	0	0
4921513I03Rik	0.729167	0	0	0	0	0	2	0	0	0	0	5	0	0	0	3	0	0	2	0	1	0	0	2	5	0	0	0	0	0	1	0	1	0	1	0	0	1	0	0	1	0	1	3	0	1	1	1	3
4921515E04Rik	0.0625	0	1	0	0	0	0	0	0	0	0	0	0	0	0	0	0	0	0	0	0	0	0	0	0	0	0	0	0	0	0	0	0	0	0	0	0	0	0	1	0	0	0	0	0	0	0	1	0
4921517D22Rik	11.5208	2	5	6	13	10	10	7	15	3	13	8	7	10	14	14	4	10	6	10	10	13	16	19	16	13	13	17	8	20	15	22	11	19	16	9	22	18	6	10	8	22	10	15	12	8	3	9	2
4921518K17Rik	0.208333	0	0	0	0	0	0	0	0	0	0	0	0	0	0	0	0	0	1	0	1	0	0	0	1	0	0	0	1	0	0	0	1	0	0	0	0	0	1	0	0	1	0	2	0	1	0	0	0
4921524J17Rik	181.083	74	209	178	222	191	254	74	192	82	219	146	146	114	240	144	88	170	98	106	114	188	201	284	242	152	113	199	251	256	205	264	166	157	152	171	149	153	167	133	161	224	151	426	224	220	131	276	164
4921524L21Rik	0	0	0	0	0	0	0	0	0	0	0	0	0	0	0	0	0	0	0	0	0	0	0	0	0	0	0	0	0	0	0	0	0	0	0	0	0	0	0	0	0	0	0	0	0	0	0	0	0
4921525O09Rik	0.0416667	0	0	0	0	0	1	0	0	0	0	0	0	0	0	0	0	0	0	0	0	0	0	0	0	0	0	0	0	0	0	0	0	1	0	0	0	0	0	0	0	0	0	0	0	0	0	0	0
4921529L05Rik	0.0625	0	0	0	0	0	0	0	0	0	1	0	0	0	0	0	0	1	0	0	0	0	0	0	0	0	0	0	0	0	0	0	0	0	1	0	0	0	0	0	0	0	0	0	0	0	0	0	0
4921530L21Rik	0	0	0	0	0	0	0	0	0	0	0	0	0	0	0	0	0	0	0	0	0	0	0	0	0	0	0	0	0	0	0	0	0	0	0	0	0	0	0	0	0	0	0	0	0	0	0	0	0
4921531C22Rik	37.7708	11	25	29	36	59	74	15	41	13	45	29	30	49	26	40	24	40	22	29	29	39	16	85	73	34	20	26	30	57	44	53	34	33	33	41	44	35	21	27	32	39	32	87	43	33	11	73	34
4921531P14Rik	0.0625	0	0	0	0	0	0	0	0	0	0	0	0	0	0	0	0	0	0	0	0	0	0	2	0	0	0	0	0	0	0	1	0	0	0	0	0	0	0	0	0	0	0	0	0	0	0	0	0
4921533I20Rik	2.77083	0	12	3	4	2	3	0	10	6	1	0	0	0	0	2	2	1	1	6	0	5	0	5	7	2	3	2	1	4	5	2	2	3	2	2	1	3	1	8	3	2	1	6	0	2	3	3	2
4921534H16Rik	0.0208333	0	0	0	0	0	0	0	0	0	0	0	0	0	1	0	0	0	0	0	0	0	0	0	0	0	0	0	0	0	0	0	0	0	0	0	0	0	0	0	0	0	0	0	0	0	0	0	0
4921536K21Rik	23.125	10	42	25	28	23	39	10	24	12	46	15	12	14	35	15	13	24	18	19	21	12	39	45	26	10	19	20	17	20	25	23	16	23	24	23	17	19	14	14	23	32	27	50	27	24	19	34	13
4921539E11Rik	0.0625	0	0	0	0	0	0	0	0	0	0	0	0	0	0	0	0	0	0	0	0	0	0	0	0	0	0	0	0	0	0	0	0	0	0	0	0	0	1	0	0	0	0	2	0	0	0	0	0
4922502D21Rik	0	0	0	0	0	0	0	0	0	0	0	0	0	0	0	0	0	0	0	0	0	0	0	0	0	0	0	0	0	0	0	0	0	0	0	0	0	0	0	0	0	0	0	0	0	0	0	0	0
4922502H24Rik	0	0	0	0	0	0	0	0	0	0	0	0	0	0	0	0	0	0	0	0	0	0	0	0	0	0	0	0	0	0	0	0	0	0	0	0	0	0	0	0	0	0	0	0	0	0	0	0	0
4922502N22Rik	0	0	0	0	0	0	0	0	0	0	0	0	0	0	0	0	0	0	0	0	0	0	0	0	0	0	0	0	0	0	0	0	0	0	0	0	0	0	0	0	0	0	0	0	0	0	0	0	0
4930401C15Rik	0.0416667	0	0	0	0	0	0	0	0	0	0	0	0	0	1	0	0	0	0	0	0	0	0	0	0	0	0	0	0	0	0	0	0	0	0	0	0	0	0	0	0	0	1	0	0	0	0	0	0
4930401O10Rik	0	0	0	0	0	0	0	0	0	0	0	0	0	0	0	0	0	0	0	0	0	0	0	0	0	0	0	0	0	0	0	0	0	0	0	0	0	0	0	0	0	0	0	0	0	0	0	0	0
4930401O12Rik	0	0	0	0	0	0	0	0	0	0	0	0	0	0	0	0	0	0	0	0	0	0	0	0	0	0	0	0	0	0	0	0	0	0	0	0	0	0	0	0	0	0	0	0	0	0	0	0	0
4930402F06Rik	0	0	0	0	0	0	0	0	0	0	0	0	0	0	0	0	0	0	0	0	0	0	0	0	0	0	0	0	0	0	0	0	0	0	0	0	0	0	0	0	0	0	0	0	0	0	0	0	0
4930402F11Rik	0	0	0	0	0	0	0	0	0	0	0	0	0	0	0	0	0	0	0	0	0	0	0	0	0	0	0	0	0	0	0	0	0	0	0	0	0	0	0	0	0	0	0	0	0	0	0	0	0
4930402H24Rik	857.458	369	807	628	712	950	1071	411	987	509	876	762	585	695	1446	1030	517	1385	522	808	513	959	809	1596	1516	555	448	529	587	793	939	1020	927	1242	570	1031	632	759	753	978	972	1347	783	2181	880	938	436	955	440
4930402K13Rik	0	0	0	0	0	0	0	0	0	0	0	0	0	0	0	0	0	0	0	0	0	0	0	0	0	0	0	0	0	0	0	0	0	0	0	0	0	0	0	0	0	0	0	0	0	0	0	0	0
4930404A05Rik	0	0	0	0	0	0	0	0	0	0	0	0	0	0	0	0	0	0	0	0	0	0	0	0	0	0	0	0	0	0	0	0	0	0	0	0	0	0	0	0	0	0	0	0	0	0	0	0	0
4930404H11Rik	1.89583	0	2	1	1	1	0	0	5	0	0	6	2	1	5	5	0	4	0	0	6	1	3	1	5	0	1	2	2	1	2	1	1	3	3	2	0	3	1	2	0	2	0	5	0	3	1	1	2
4930404I05Rik	19.5417	3	11	17	21	22	27	3	18	4	15	24	41	22	22	13	7	12	7	9	17	16	24	23	40	40	5	10	14	35	20	19	16	12	17	31	10	16	12	15	9	22	17	44	27	33	12	36	30
4930404N11Rik	84.5208	20	58	73	76	168	121	45	98	20	103	84	89	108	113	72	40	81	34	55	65	53	72	191	184	178	34	33	49	115	105	85	73	71	54	111	101	106	42	38	43	82	60	191	80	70	48	154	68
4930405A10Rik	0.0416667	0	0	0	0	0	0	0	0	0	0	0	0	0	0	0	0	0	0	0	0	0	0	0	0	0	0	0	0	0	0	0	0	1	0	0	0	0	0	0	0	0	0	0	0	0	1	0	0
4930405A21Rik	6.14583	0	7	6	11	8	9	1	1	0	7	5	13	8	7	11	4	8	6	3	3	8	15	11	7	2	3	0	0	11	9	7	12	7	2	10	4	3	2	3	5	8	8	5	9	9	4	10	1
4930405D11Rik	0	0	0	0	0	0	0	0	0	0	0	0	0	0	0	0	0	0	0	0	0	0	0	0	0	0	0	0	0	0	0	0	0	0	0	0	0	0	0	0	0	0	0	0	0	0	0	0	0
4930405J17Rik	2.22917	0	8	4	2	0	0	1	2	5	1	0	0	1	2	3	2	3	4	1	0	0	1	3	3	1	2	1	1	3	2	3	0	1	3	8	2	0	0	3	9	6	0	2	4	3	0	4	0
4930405L22Rik	0	0	0	0	0	0	0	0	0	0	0	0	0	0	0	0	0	0	0	0	0	0	0	0	0	0	0	0	0	0	0	0	0	0	0	0	0	0	0	0	0	0	0	0	0	0	0	0	0
4930405O22Rik	0.333333	0	0	0	0	0	0	0	2	0	0	0	0	0	0	2	0	0	0	0	0	0	0	0	3	0	0	0	0	0	0	0	0	0	0	1	0	0	0	0	0	0	0	3	0	4	0	0	1
4930406D18Rik	0	0	0	0	0	0	0	0	0	0	0	0	0	0	0	0	0	0	0	0	0	0	0	0	0	0	0	0	0	0	0	0	0	0	0	0	0	0	0	0	0	0	0	0	0	0	0	0	0
4930407G08Rik	1.10417	0	7	1	1	2	1	0	0	0	2	0	1	0	2	2	0	1	0	2	3	4	1	1	0	0	0	0	0	0	1	3	1	1	0	3	0	0	0	3	1	0	3	3	1	1	1	0	0
4930407I10Rik	0.145833	0	0	0	0	0	0	0	0	0	0	0	1	0	0	0	0	0	0	0	0	4	0	0	0	0	0	0	0	0	0	0	0	0	0	0	0	0	0	1	0	0	0	1	0	0	0	0	0
4930407I19Rik	0	0	0	0	0	0	0	0	0	0	0	0	0	0	0	0	0	0	0	0	0	0	0	0	0	0	0	0	0	0	0	0	0	0	0	0	0	0	0	0	0	0	0	0	0	0	0	0	0
4930412B13Rik	0	0	0	0	0	0	0	0	0	0	0	0	0	0	0	0	0	0	0	0	0	0	0	0	0	0	0	0	0	0	0	0	0	0	0	0	0	0	0	0	0	0	0	0	0	0	0	0	0
4930412C18Rik	71.2292	26	98	78	71	73	86	26	85	41	111	43	79	79	89	61	28	71	43	36	51	66	67	117	110	26	51	63	67	93	89	78	61	85	84	87	75	67	47	76	66	109	47	139	98	83	27	95	51
4930412O13Rik	91	31	61	73	74	96	144	31	83	34	111	277	150	117	124	71	61	88	57	70	60	74	75	143	186	42	45	56	52	81	95	75	82	56	65	83	101	86	42	57	78	124	89	242	94	100	48	150	82
4930413E15Rik	0	0	0	0	0	0	0	0	0	0	0	0	0	0	0	0	0	0	0	0	0	0	0	0	0	0	0	0	0	0	0	0	0	0	0	0	0	0	0	0	0	0	0	0	0	0	0	0	0
4930413F20Rik	2.02083	0	1	3	1	4	1	0	3	0	1	0	6	2	2	2	0	2	1	5	2	1	1	0	0	2	2	0	0	2	3	1	2	1	0	4	0	6	0	2	0	2	1	10	6	0	1	8	3
4930413G21Rik	168.354	61	152	212	230	248	231	63	198	70	187	178	190	176	214	160	98	127	61	75	229	122	237	285	358	140	126	122	128	188	208	169	118	167	157	187	149	145	135	163	122	205	84	367	203	171	90	236	100
4930413M19Rik	0	0	0	0	0	0	0	0	0	0	0	0	0	0	0	0	0	0	0	0	0	0	0	0	0	0	0	0	0	0	0	0	0	0	0	0	0	0	0	0	0	0	0	0	0	0	0	0	0
4930414N06Rik	0.145833	0	0	0	1	0	0	0	0	1	0	0	2	0	0	0	0	0	0	0	0	0	0	0	0	0	0	0	0	0	0	0	1	0	0	0	0	0	0	0	0	0	0	0	1	1	0	0	0
4930415F15Rik	2.27083	0	9	0	2	4	2	0	0	1	0	0	2	4	4	1	1	3	0	2	3	0	6	6	1	0	3	4	0	3	2	3	2	1	0	3	3	1	5	2	4	0	2	4	5	4	2	3	2
4930415L06Rik	0	0	0	0	0	0	0	0	0	0	0	0	0	0	0	0	0	0	0	0	0	0	0	0	0	0	0	0	0	0	0	0	0	0	0	0	0	0	0	0	0	0	0	0	0	0	0	0	0
4930415O20Rik	7.60417	1	10	3	1	8	8	4	5	4	11	2	12	9	20	6	1	15	7	5	1	12	8	13	14	2	1	7	10	6	11	15	7	9	5	15	5	1	3	5	6	15	7	22	6	6	7	7	5
4930417O13Rik	0.208333	0	0	0	0	0	0	0	0	0	0	0	0	0	1	0	0	0	0	0	0	0	0	0	0	3	0	0	0	0	0	1	2	0	0	0	0	0	0	0	2	0	0	0	0	0	0	0	1
4930417O22Rik	0.125	0	0	0	0	0	0	0	0	0	0	0	0	0	0	0	0	1	0	0	0	1	0	0	0	0	0	0	0	0	0	0	0	1	0	0	0	0	0	0	0	0	0	0	0	0	0	0	1
4930419G24Rik	0.645833	0	0	1	0	0	0	0	6	0	3	0	2	1	0	0	0	0	0	1	2	0	0	4	0	0	0	0	0	0	0	0	1	2	0	0	0	1	0	0	2	1	0	2	0	1	0	0	1
4930423M02Rik	0.0625	0	0	0	0	0	0	0	0	0	2	0	0	0	0	0	0	0	0	0	0	0	0	1	0	0	0	0	0	0	0	0	0	0	0	0	0	0	0	0	0	0	0	0	0	0	0	0	0
4930425K10Rik	0.0625	0	0	0	0	0	0	0	0	0	0	0	0	0	0	0	0	0	0	0	0	0	0	0	0	0	0	0	0	0	0	0	0	0	0	0	0	3	0	0	0	0	0	0	0	0	0	0	0
4930425L21Rik	0	0	0	0	0	0	0	0	0	0	0	0	0	0	0	0	0	0	0	0	0	0	0	0	0	0	0	0	0	0	0	0	0	0	0	0	0	0	0	0	0	0	0	0	0	0	0	0	0
4930425O10Rik	0.166667	0	0	0	0	0	2	1	0	0	0	0	0	0	0	1	0	0	0	0	0	0	1	0	0	0	0	1	0	0	0	0	0	0	0	0	0	2	0	0	0	0	0	0	0	0	0	0	0
4930426D05Rik	98.3333	37	95	67	84	121	137	39	111	45	167	183	132	79	131	75	37	109	53	79	60	110	112	190	181	105	56	62	63	116	119	87	90	66	45	122	70	81	58	51	57	126	98	233	117	132	54	182	72
4930426L09Rik	2.6875	0	0	3	1	4	4	2	5	1	0	2	5	1	5	1	2	5	6	1	2	3	7	6	1	4	1	2	1	3	2	3	1	1	3	1	3	4	1	2	0	1	0	4	3	11	4	4	1
4930427A07Rik	14.2292	2	22	11	15	24	29	7	17	7	17	17	2	11	21	8	8	13	7	8	16	14	8	23	22	80	7	13	11	12	15	10	13	9	9	15	9	13	9	9	11	9	17	22	21	8	3	17	10
4930428D20Rik	0	0	0	0	0	0	0	0	0	0	0	0	0	0	0	0	0	0	0	0	0	0	0	0	0	0	0	0	0	0	0	0	0	0	0	0	0	0	0	0	0	0	0	0	0	0	0	0	0
4930428E07Rik	0	0	0	0	0	0	0	0	0	0	0	0	0	0	0	0	0	0	0	0	0	0	0	0	0	0	0	0	0	0	0	0	0	0	0	0	0	0	0	0	0	0	0	0	0	0	0	0	0
4930428G15Rik	0.125	0	0	0	1	0	0	0	0	0	0	0	0	0	0	0	0	0	0	0	0	1	0	0	0	0	0	0	0	0	1	0	0	0	0	1	0	0	0	1	0	0	0	0	1	0	0	0	0
4930428O21Rik	0.0208333	0	0	0	0	0	0	0	0	0	0	0	0	0	0	0	0	0	0	0	0	0	0	0	0	0	0	0	0	0	0	0	0	0	0	0	0	0	0	0	0	0	0	1	0	0	0	0	0
4930429B21Rik	7.25	1	18	7	11	11	11	4	17	2	5	4	11	3	7	9	4	7	5	4	5	15	6	7	15	8	7	7	1	9	3	9	3	2	4	9	3	10	4	8	3	9	3	10	8	11	1	20	4
4930429D17Rik	0.1875	0	0	0	0	0	0	0	0	0	0	0	0	0	2	0	0	0	0	2	0	0	0	0	0	0	0	0	0	0	0	0	0	0	0	0	1	1	0	0	0	2	0	0	0	1	0	0	0
4930429F11Rik	0.0208333	0	0	0	0	0	0	0	0	0	0	0	0	0	0	0	0	0	0	0	0	0	0	0	0	0	0	0	0	0	0	0	0	0	0	0	0	0	0	0	1	0	0	0	0	0	0	0	0
4930429F24Rik	10.1458	2	6	13	11	9	13	7	6	4	14	28	17	14	11	6	2	12	9	5	3	7	9	22	21	9	11	7	5	11	12	12	11	10	2	6	14	13	5	6	7	15	12	29	7	13	4	10	3
4930430A15Rik	0	0	0	0	0	0	0	0	0	0	0	0	0	0	0	0	0	0	0	0	0	0	0	0	0	0	0	0	0	0	0	0	0	0	0	0	0	0	0	0	0	0	0	0	0	0	0	0	0
4930430F08Rik	106.208	45	136	72	115	145	129	53	124	76	128	75	45	102	147	82	68	74	69	84	65	110	112	169	162	54	67	102	78	141	139	131	95	125	102	104	109	105	85	82	122	127	90	261	110	135	92	164	66
4930430F21Rik	0	0	0	0	0	0	0	0	0	0	0	0	0	0	0	0	0	0	0	0	0	0	0	0	0	0	0	0	0	0	0	0	0	0	0	0	0	0	0	0	0	0	0	0	0	0	0	0	0
4930430J02Rik	0.4375	0	1	2	0	0	0	0	0	0	0	1	2	3	0	1	0	2	0	0	0	0	0	0	0	0	0	0	1	0	1	0	0	1	0	1	0	0	1	2	0	1	0	0	0	0	1	0	0
4930431F12Rik	0.479167	0	0	1	0	0	0	0	0	0	2	5	2	0	0	2	0	0	1	0	0	0	0	0	0	3	0	0	1	0	0	1	0	0	1	0	0	0	1	0	0	1	0	1	1	0	0	0	0
4930431P03Rik	0.645833	0	0	0	0	1	0	0	0	2	2	0	0	1	0	0	0	0	0	0	0	2	0	0	0	9	1	0	0	1	1	0	2	0	1	2	0	0	0	0	0	0	0	1	0	0	1	3	1
4930432J09Rik	0.625	0	0	0	0	0	0	0	0	0	0	0	2	0	0	1	0	3	0	0	0	0	0	5	3	0	0	0	1	2	0	0	2	0	0	0	1	3	1	0	2	1	1	1	0	0	0	1	0
4930432K21Rik	4.8125	0	15	5	5	7	8	2	4	0	8	4	3	0	12	3	3	6	2	4	7	4	2	5	2	3	0	6	3	6	2	5	5	4	2	8	3	5	4	3	3	6	4	15	6	3	2	13	3
4930432M17Rik	0	0	0	0	0	0	0	0	0	0	0	0	0	0	0	0	0	0	0	0	0	0	0	0	0	0	0	0	0	0	0	0	0	0	0	0	0	0	0	0	0	0	0	0	0	0	0	0	0
4930433B08Rik	0	0	0	0	0	0	0	0	0	0	0	0	0	0	0	0	0	0	0	0	0	0	0	0	0	0	0	0	0	0	0	0	0	0	0	0	0	0	0	0	0	0	0	0	0	0	0	0	0
4930433I11Rik	0	0	0	0	0	0	0	0	0	0	0	0	0	0	0	0	0	0	0	0	0	0	0	0	0	0	0	0	0	0	0	0	0	0	0	0	0	0	0	0	0	0	0	0	0	0	0	0	0
4930433N12Rik	18.25	4	16	14	15	21	24	8	17	14	24	71	36	20	13	17	4	15	13	9	4	17	22	33	38	7	6	11	12	20	22	16	18	14	9	14	14	18	10	11	16	29	8	53	19	22	7	22	14
4930434J06Rik	0	0	0	0	0	0	0	0	0	0	0	0	0	0	0	0	0	0	0	0	0	0	0	0	0	0	0	0	0	0	0	0	0	0	0	0	0	0	0	0	0	0	0	0	0	0	0	0	0
4930435E12Rik	0	0	0	0	0	0	0	0	0	0	0	0	0	0	0	0	0	0	0	0	0	0	0	0	0	0	0	0	0	0	0	0	0	0	0	0	0	0	0	0	0	0	0	0	0	0	0	0	0
4930438E09Rik	0	0	0	0	0	0	0	0	0	0	0	0	0	0	0	0	0	0	0	0	0	0	0	0	0	0	0	0	0	0	0	0	0	0	0	0	0	0	0	0	0	0	0	0	0	0	0	0	0
4930440C22Rik	0	0	0	0	0	0	0	0	0	0	0	0	0	0	0	0	0	0	0	0	0	0	0	0	0	0	0	0	0	0	0	0	0	0	0	0	0	0	0	0	0	0	0	0	0	0	0	0	0
4930440I19Rik	0	0	0	0	0	0	0	0	0	0	0	0	0	0	0	0	0	0	0	0	0	0	0	0	0	0	0	0	0	0	0	0	0	0	0	0	0	0	0	0	0	0	0	0	0	0	0	0	0
4930441H08Rik	0	0	0	0	0	0	0	0	0	0	0	0	0	0	0	0	0	0	0	0	0	0	0	0	0	0	0	0	0	0	0	0	0	0	0	0	0	0	0	0	0	0	0	0	0	0	0	0	0
4930441J16Rik	0	0	0	0	0	0	0	0	0	0	0	0	0	0	0	0	0	0	0	0	0	0	0	0	0	0	0	0	0	0	0	0	0	0	0	0	0	0	0	0	0	0	0	0	0	0	0	0	0
4930442J19Rik	0	0	0	0	0	0	0	0	0	0	0	0	0	0	0	0	0	0	0	0	0	0	0	0	0	0	0	0	0	0	0	0	0	0	0	0	0	0	0	0	0	0	0	0	0	0	0	0	0
4930442L01Rik	28.4583	5	20	38	38	26	40	11	30	13	52	36	19	20	59	32	24	31	13	25	16	27	44	61	39	5	12	33	29	28	37	30	20	29	20	28	17	20	23	30	40	29	30	53	28	32	19	31	17
4930443O20Rik	0.958333	0	0	1	0	3	0	0	0	2	7	0	1	0	0	2	1	2	0	0	0	0	0	0	0	0	0	0	0	2	2	0	1	2	0	2	1	0	0	0	1	3	1	6	3	0	1	0	1
4930444F02Rik	0.458333	0	0	0	0	1	1	0	0	1	0	0	0	0	0	0	0	1	0	1	1	0	0	1	1	1	0	0	0	1	1	1	1	0	0	1	1	1	1	0	1	1	1	0	0	0	0	0	2
4930444G20Rik	0.854167	0	3	0	1	4	0	1	2	2	4	3	0	2	2	0	1	0	0	0	0	0	0	0	1	1	0	0	1	0	0	3	0	0	0	1	0	1	0	1	1	0	0	0	0	0	0	1	4
4930444M15Rik	0.0208333	0	0	0	0	0	0	0	0	0	0	0	0	1	0	0	0	0	0	0	0	0	0	0	0	0	0	0	0	0	0	0	0	0	0	0	0	0	0	0	0	0	0	0	0	0	0	0	0
4930444P10Rik	0.75	0	0	0	0	0	2	0	0	0	0	4	0	1	0	1	0	0	0	2	0	1	0	0	4	1	1	2	0	0	0	1	1	1	0	2	0	2	0	2	2	1	2	1	0	1	1	0	0
4930445N18Rik	0.104167	0	0	0	0	0	0	0	0	0	0	0	0	0	0	0	0	0	0	2	0	0	0	0	0	0	0	0	1	0	0	1	0	0	0	0	0	0	0	0	0	0	0	1	0	0	0	0	0
4930447A16Rik	0.0416667	0	0	0	0	0	0	0	0	0	0	0	0	0	0	0	0	0	0	0	0	0	0	0	0	0	0	0	0	0	0	0	0	0	0	0	0	0	0	0	0	0	0	1	0	1	0	0	0
4930447C04Rik	0.0208333	0	0	0	0	0	0	0	0	0	0	0	0	0	0	0	0	0	0	0	0	0	0	0	0	0	0	0	0	0	0	0	0	0	0	0	0	0	0	0	0	1	0	0	0	0	0	0	0
4930447F24Rik	0.645833	0	1	0	0	0	1	0	0	1	0	0	0	0	1	0	0	4	0	1	0	0	3	0	7	0	0	0	0	2	0	0	0	0	0	3	0	0	0	0	2	1	0	3	1	0	0	0	0
4930447J18Rik	0	0	0	0	0	0	0	0	0	0	0	0	0	0	0	0	0	0	0	0	0	0	0	0	0	0	0	0	0	0	0	0	0	0	0	0	0	0	0	0	0	0	0	0	0	0	0	0	0
4930447K03Rik	7.20833	0	2	7	5	7	21	6	9	3	6	0	3	8	14	8	3	9	4	4	6	5	6	15	9	22	2	6	3	5	9	7	10	4	8	8	3	8	11	13	6	15	7	11	3	8	2	6	6
4930447M23Rik	0.5625	0	0	0	0	0	1	0	0	0	0	0	0	5	0	0	0	1	1	1	0	0	0	3	0	1	0	1	0	2	0	2	1	1	0	1	1	1	0	1	0	1	1	0	0	1	0	0	0
4930447N08Rik	0.145833	0	0	0	0	0	0	0	0	0	0	0	0	0	0	0	0	0	0	1	0	0	0	0	0	0	0	0	0	0	1	0	0	0	0	0	0	0	0	0	0	0	0	0	0	1	0	4	0
4930448C13Rik	0	0	0	0	0	0	0	0	0	0	0	0	0	0	0	0	0	0	0	0	0	0	0	0	0	0	0	0	0	0	0	0	0	0	0	0	0	0	0	0	0	0	0	0	0	0	0	0	0
4930448F12Rik	0	0	0	0	0	0	0	0	0	0	0	0	0	0	0	0	0	0	0	0	0	0	0	0	0	0	0	0	0	0	0	0	0	0	0	0	0	0	0	0	0	0	0	0	0	0	0	0	0
4930448H16Rik	0.0833333	0	0	0	0	0	1	0	0	0	0	0	1	0	0	0	0	0	0	0	0	0	0	0	0	0	0	0	0	0	0	0	0	0	1	1	0	0	0	0	0	0	0	0	0	0	0	0	0
4930448I06Rik	0	0	0	0	0	0	0	0	0	0	0	0	0	0	0	0	0	0	0	0	0	0	0	0	0	0	0	0	0	0	0	0	0	0	0	0	0	0	0	0	0	0	0	0	0	0	0	0	0
4930448I18Rik	0.291667	0	0	2	0	0	0	0	0	0	0	3	2	0	0	0	0	0	0	0	0	0	0	0	0	0	1	0	1	0	0	0	0	0	0	0	0	0	0	0	0	1	0	1	0	0	0	1	0
4930448K20Rik	0.479167	0	4	1	1	0	3	0	0	0	0	0	0	3	1	0	0	0	0	0	0	0	0	0	1	1	0	0	0	0	0	0	0	0	0	0	0	1	1	0	0	2	0	2	0	0	0	0	1
4930449E01Rik	0	0	0	0	0	0	0	0	0	0	0	0	0	0	0	0	0	0	0	0	0	0	0	0	0	0	0	0	0	0	0	0	0	0	0	0	0	0	0	0	0	0	0	0	0	0	0	0	0
4930449E18Rik	0.270833	0	1	0	2	0	0	0	1	0	0	0	0	0	0	2	0	1	0	0	0	0	1	0	1	0	0	0	0	1	0	0	0	0	0	0	0	1	0	0	0	0	1	0	0	0	0	0	1
4930449I24Rik	0.791667	0	0	0	0	0	0	0	0	2	2	0	0	0	6	0	0	0	0	0	1	5	10	0	0	0	0	0	0	0	0	0	3	2	1	0	0	0	0	1	0	0	0	0	1	4	0	0	0
4930451G09Rik	24.5417	7	44	41	23	38	33	15	50	7	30	34	40	23	47	15	11	18	14	15	17	19	17	47	41	23	14	18	22	20	29	29	20	14	20	31	30	21	15	13	26	17	22	40	19	28	17	28	16
4930451I11Rik	0.291667	0	0	0	0	0	0	0	0	0	0	0	0	0	1	0	0	0	0	0	0	0	0	0	0	0	0	0	3	0	0	2	1	1	0	1	0	0	0	1	0	1	0	1	0	0	0	1	0
4930452A19Rik	0	0	0	0	0	0	0	0	0	0	0	0	0	0	0	0	0	0	0	0	0	0	0	0	0	0	0	0	0	0	0	0	0	0	0	0	0	0	0	0	0	0	0	0	0	0	0	0	0
4930452B06Rik	27.0208	7	56	41	25	24	19	8	44	7	20	7	18	11	78	31	15	22	13	14	26	51	40	34	40	43	27	48	37	25	20	24	17	26	30	18	11	13	27	18	38	22	17	35	24	58	29	21	14
4930452G13Rik	0.0208333	0	0	1	0	0	0	0	0	0	0	0	0	0	0	0	0	0	0	0	0	0	0	0	0	0	0	0	0	0	0	0	0	0	0	0	0	0	0	0	0	0	0	0	0	0	0	0	0
4930452N14Rik	0.0625	0	0	0	0	0	1	0	0	0	0	0	0	0	0	0	0	0	0	0	0	0	0	0	1	0	0	1	0	0	0	0	0	0	0	0	0	0	0	0	0	0	0	0	0	0	0	0	0
4930453H23Rik	0.0833333	0	0	0	0	0	0	2	0	0	0	0	0	0	0	0	0	0	0	0	0	0	0	0	0	0	0	0	0	0	0	0	0	0	0	0	1	0	0	0	0	0	0	0	1	0	0	0	0
4930453L07Rik	0.645833	0	2	0	0	2	0	0	4	0	0	4	0	0	0	0	0	2	0	2	0	0	1	0	0	0	0	0	1	1	0	2	0	1	0	0	1	0	0	2	0	1	1	0	1	0	1	0	2
4930453N24Rik	239.604	103	373	212	300	290	342	118	255	126	258	182	142	198	370	232	120	248	103	137	166	279	280	403	343	249	170	252	255	271	224	237	224	255	229	239	177	184	200	221	248	316	194	530	291	320	164	297	143
4930455B14Rik	0.104167	0	0	0	0	0	0	0	0	0	0	0	1	0	0	0	0	0	0	0	0	0	0	0	1	0	0	0	0	0	0	0	0	0	2	0	0	0	0	0	0	0	0	0	1	0	0	0	0
4930455C13Rik	1.60417	0	0	1	2	0	2	1	1	0	0	0	0	0	5	0	0	3	1	0	1	2	0	3	3	0	1	6	3	5	2	4	4	1	1	0	1	0	0	1	0	0	1	7	3	3	3	3	0
4930455D15Rik	0.0208333	0	0	0	0	0	1	0	0	0	0	0	0	0	0	0	0	0	0	0	0	0	0	0	0	0	0	0	0	0	0	0	0	0	0	0	0	0	0	0	0	0	0	0	0	0	0	0	0
4930455F16Rik	0.0833333	0	0	0	0	0	0	0	0	0	1	0	1	0	0	0	0	0	0	0	0	0	0	0	0	0	0	0	0	0	0	0	0	0	0	1	0	0	0	1	0	0	0	0	0	0	0	0	0
4930455G09Rik	4.8125	0	16	4	1	4	11	3	1	1	8	7	5	1	1	1	2	4	1	3	5	5	1	7	6	22	7	1	3	7	1	3	5	3	4	10	4	6	6	4	0	7	5	15	3	4	2	8	3
4930455H04Rik	0.166667	0	0	2	0	0	0	0	0	0	0	0	0	0	0	2	0	0	0	0	0	4	0	0	0	0	0	0	0	0	0	0	0	0	0	0	0	0	0	0	0	0	0	0	0	0	0	0	0
4930455J16Rik	0	0	0	0	0	0	0	0	0	0	0	0	0	0	0	0	0	0	0	0	0	0	0	0	0	0	0	0	0	0	0	0	0	0	0	0	0	0	0	0	0	0	0	0	0	0	0	0	0
4930456L15Rik	0	0	0	0	0	0	0	0	0	0	0	0	0	0	0	0	0	0	0	0	0	0	0	0	0	0	0	0	0	0	0	0	0	0	0	0	0	0	0	0	0	0	0	0	0	0	0	0	0
4930459C07Rik	0.9375	0	0	0	0	2	0	1	0	0	0	3	1	2	0	0	0	0	0	0	0	0	0	0	6	0	0	0	1	2	2	5	2	0	2	1	1	1	0	0	0	4	2	3	0	0	0	2	2
4930459L07Rik	0	0	0	0	0	0	0	0	0	0	0	0	0	0	0	0	0	0	0	0	0	0	0	0	0	0	0	0	0	0	0	0	0	0	0	0	0	0	0	0	0	0	0	0	0	0	0	0	0
4930461G14Rik	31.3958	1	34	39	31	50	59	12	32	9	45	39	59	22	18	20	10	20	16	23	20	24	27	64	51	1	16	17	37	43	38	32	30	20	17	35	27	35	15	21	21	51	26	88	38	35	20	64	29
4930463O16Rik	0.0416667	0	0	0	1	0	0	0	0	0	0	0	0	0	0	0	0	0	0	0	0	0	0	0	0	0	0	0	0	0	0	0	0	0	0	0	0	0	0	0	0	0	0	1	0	0	0	0	0
4930465K10Rik	0.416667	0	0	0	4	0	0	0	3	0	0	0	0	1	1	1	1	0	0	0	0	0	0	0	1	0	0	0	2	2	0	0	0	0	1	0	0	0	1	0	0	0	0	0	0	0	0	0	0
4930465M20Rik	0	0	0	0	0	0	0	0	0	0	0	0	0	0	0	0	0	0	0	0	0	0	0	0	0	0	0	0	0	0	0	0	0	0	0	0	0	0	0	0	0	0	0	0	0	0	0	0	0
4930467D21Rik	0	0	0	0	0	0	0	0	0	0	0	0	0	0	0	0	0	0	0	0	0	0	0	0	0	0	0	0	0	0	0	0	0	0	0	0	0	0	0	0	0	0	0	0	0	0	0	0	0
4930467E23Rik	0.833333	0	2	0	0	0	3	0	0	0	0	0	0	0	0	0	1	4	0	0	2	0	0	2	0	0	0	0	0	0	1	0	2	0	0	1	1	5	0	2	1	1	1	7	0	1	0	1	2
4930467K11Rik	0.583333	0	0	0	0	0	1	0	2	0	0	2	4	0	2	2	1	1	0	0	1	0	0	0	0	0	0	3	1	0	0	0	0	0	1	0	0	0	0	2	0	0	3	2	0	0	0	0	0
4930469G21Rik	0.229167	0	0	0	0	1	0	0	0	0	0	0	0	1	0	0	0	0	0	1	0	0	0	0	0	0	0	0	1	0	2	0	0	0	0	1	0	0	0	0	0	0	0	2	2	0	0	0	0
4930470H14Rik	0.25	0	0	0	0	0	0	0	1	0	0	0	0	0	0	0	1	2	0	0	0	0	0	0	0	0	0	0	0	0	0	0	0	0	0	1	1	0	0	1	0	2	1	0	1	0	0	0	1
4930470O06Rik	0	0	0	0	0	0	0	0	0	0	0	0	0	0	0	0	0	0	0	0	0	0	0	0	0	0	0	0	0	0	0	0	0	0	0	0	0	0	0	0	0	0	0	0	0	0	0	0	0
4930470P17Rik	0	0	0	0	0	0	0	0	0	0	0	0	0	0	0	0	0	0	0	0	0	0	0	0	0	0	0	0	0	0	0	0	0	0	0	0	0	0	0	0	0	0	0	0	0	0	0	0	0
4930471C04Rik	0.208333	0	0	0	0	0	0	1	0	0	0	0	0	0	1	1	0	0	1	0	0	0	0	1	0	0	0	0	0	0	0	0	0	0	2	0	0	0	1	0	0	0	1	0	0	0	0	0	1
4930471G03Rik	0	0	0	0	0	0	0	0	0	0	0	0	0	0	0	0	0	0	0	0	0	0	0	0	0	0	0	0	0	0	0	0	0	0	0	0	0	0	0	0	0	0	0	0	0	0	0	0	0
4930471M09Rik	0.1875	0	0	0	0	0	0	0	0	1	0	0	2	0	0	0	0	1	0	0	1	0	0	0	0	0	0	0	0	0	0	1	0	0	0	0	0	0	0	2	0	1	0	0	0	0	0	0	0
4930473A02Rik	6.47917	0	18	2	4	7	10	2	3	2	14	1	5	7	17	5	2	5	7	2	5	4	5	20	19	3	7	4	10	0	6	7	5	1	2	5	2	10	7	5	7	6	5	14	12	8	0	9	8
4930473O22Rik	0	0	0	0	0	0	0	0	0	0	0	0	0	0	0	0	0	0	0	0	0	0	0	0	0	0	0	0	0	0	0	0	0	0	0	0	0	0	0	0	0	0	0	0	0	0	0	0	0
4930474G06Rik	0	0	0	0	0	0	0	0	0	0	0	0	0	0	0	0	0	0	0	0	0	0	0	0	0	0	0	0	0	0	0	0	0	0	0	0	0	0	0	0	0	0	0	0	0	0	0	0	0
4930474H20Rik	0	0	0	0	0	0	0	0	0	0	0	0	0	0	0	0	0	0	0	0	0	0	0	0	0	0	0	0	0	0	0	0	0	0	0	0	0	0	0	0	0	0	0	0	0	0	0	0	0
4930474M22Rik	0.541667	0	0	2	0	2	2	0	0	0	2	0	0	1	0	1	0	2	0	0	0	0	3	0	1	0	0	0	0	0	3	0	0	0	0	0	2	0	0	1	0	0	1	3	0	0	0	0	0
4930474N05Rik	0	0	0	0	0	0	0	0	0	0	0	0	0	0	0	0	0	0	0	0	0	0	0	0	0	0	0	0	0	0	0	0	0	0	0	0	0	0	0	0	0	0	0	0	0	0	0	0	0
4930474N09Rik	0.416667	0	5	0	0	1	0	2	0	0	1	0	0	1	1	0	0	1	0	0	0	0	0	0	0	0	0	0	0	1	0	0	1	1	0	0	0	0	0	0	0	2	1	1	1	0	0	0	0
4930477N07Rik	0.0625	0	0	0	0	0	0	0	0	0	0	0	0	0	0	0	0	0	0	0	0	0	0	0	1	0	0	0	0	0	0	0	0	0	0	0	0	0	0	0	0	0	0	0	0	0	0	2	0
4930478L05Rik	0.0208333	0	0	0	0	0	0	0	0	0	0	0	0	0	0	0	0	0	0	0	0	0	0	0	0	0	0	0	1	0	0	0	0	0	0	0	0	0	0	0	0	0	0	0	0	0	0	0	0
4930478P22Rik	0.166667	0	0	0	2	0	3	0	0	0	0	0	0	0	0	0	0	1	0	0	0	0	0	0	0	0	0	0	0	0	0	0	0	0	0	0	0	2	0	0	0	0	0	0	0	0	0	0	0
4930479D17Rik	2.20833	0	2	0	0	3	2	2	1	0	4	2	2	2	8	3	1	6	0	0	1	0	5	3	7	10	2	0	5	2	1	5	8	3	1	0	0	1	1	1	1	1	0	3	2	3	0	1	1
4930480E11Rik	0	0	0	0	0	0	0	0	0	0	0	0	0	0	0	0	0	0	0	0	0	0	0	0	0	0	0	0	0	0	0	0	0	0	0	0	0	0	0	0	0	0	0	0	0	0	0	0	0
4930480G23Rik	0	0	0	0	0	0	0	0	0	0	0	0	0	0	0	0	0	0	0	0	0	0	0	0	0	0	0	0	0	0	0	0	0	0	0	0	0	0	0	0	0	0	0	0	0	0	0	0	0
4930480K15Rik	0.0625	0	0	0	0	0	0	0	0	0	0	0	0	0	0	0	0	2	0	0	0	0	0	0	0	1	0	0	0	0	0	0	0	0	0	0	0	0	0	0	0	0	0	0	0	0	0	0	0
4930480K23Rik	33.8958	15	41	31	18	44	51	15	52	22	46	19	38	33	58	36	15	33	22	22	17	30	19	59	62	29	17	20	28	39	36	34	35	28	26	43	39	41	36	25	28	49	26	73	30	25	21	67	30
4930480M12Rik	0	0	0	0	0	0	0	0	0	0	0	0	0	0	0	0	0	0	0	0	0	0	0	0	0	0	0	0	0	0	0	0	0	0	0	0	0	0	0	0	0	0	0	0	0	0	0	0	0
4930481A15Rik	236.896	96	298	181	263	368	307	120	214	96	311	281	320	279	353	223	121	203	118	169	142	147	236	427	390	148	158	137	228	320	328	256	191	195	196	252	249	199	171	207	195	286	130	526	292	283	149	348	202
4930482G09Rik	0.0625	0	0	0	0	1	0	0	0	0	0	0	0	0	0	0	0	0	1	0	0	0	0	0	0	0	0	0	0	0	0	0	0	0	0	1	0	0	0	0	0	0	0	0	0	0	0	0	0
4930483J18Rik	0.1875	0	0	0	0	0	0	0	0	0	0	0	0	0	0	0	0	0	0	0	1	0	3	2	0	0	0	0	0	0	0	0	0	0	0	0	0	0	0	1	0	0	0	0	2	0	0	0	0
4930483K19Rik	0.791667	0	0	0	0	0	0	0	0	0	0	0	1	0	0	0	2	0	1	1	1	5	0	0	0	0	0	1	0	1	1	1	2	1	0	0	0	2	2	1	2	4	0	2	5	0	0	1	0
4930483O08Rik	0.291667	0	0	0	0	0	2	1	0	0	0	0	2	0	1	0	0	0	0	0	1	0	0	1	0	0	0	0	0	1	0	0	0	0	1	0	0	0	0	1	0	0	0	0	1	1	0	0	1
4930484H19Rik	0.0833333	0	0	0	0	0	1	0	2	0	0	0	0	0	1	0	0	0	0	0	0	0	0	0	0	0	0	0	0	0	0	0	0	0	0	0	0	0	0	0	0	0	0	0	0	0	0	0	0
4930486F22Rik	0.145833	0	0	0	0	0	0	0	0	0	0	0	0	0	0	1	0	1	0	0	0	0	0	0	0	0	0	0	0	0	0	1	1	0	0	0	1	0	0	0	1	0	0	0	0	1	0	0	0
4930486I03Rik	0.1875	0	0	1	0	0	0	0	0	0	0	0	1	1	0	0	0	0	0	0	0	0	0	0	0	0	0	0	1	0	1	0	0	0	0	0	0	0	0	1	0	0	0	0	0	0	1	0	1
4930486L24Rik	5.3125	0	2	2	3	5	10	0	10	8	5	7	4	7	1	1	2	6	4	2	1	2	9	11	7	28	2	0	3	10	6	3	6	4	2	7	0	4	4	5	5	9	2	4	12	9	8	7	2
4930487D11Rik	0.25	0	0	0	1	1	0	0	0	0	0	0	0	0	0	0	0	0	0	0	0	0	0	0	0	0	0	0	0	0	1	0	0	0	1	2	1	0	0	0	0	1	0	1	0	3	0	0	0
4930487H11Rik	0.395833	0	1	1	0	1	0	0	0	0	0	0	1	0	0	1	1	0	1	0	0	2	0	0	1	1	0	0	0	0	0	0	1	0	0	0	0	1	0	0	0	1	2	1	0	1	0	1	0
4930488B22Rik	0	0	0	0	0	0	0	0	0	0	0	0	0	0	0	0	0	0	0	0	0	0	0	0	0	0	0	0	0	0	0	0	0	0	0	0	0	0	0	0	0	0	0	0	0	0	0	0	0
4930488L21Rik	0	0	0	0	0	0	0	0	0	0	0	0	0	0	0	0	0	0	0	0	0	0	0	0	0	0	0	0	0	0	0	0	0	0	0	0	0	0	0	0	0	0	0	0	0	0	0	0	0
4930500F04Rik	0	0	0	0	0	0	0	0	0	0	0	0	0	0	0	0	0	0	0	0	0	0	0	0	0	0	0	0	0	0	0	0	0	0	0	0	0	0	0	0	0	0	0	0	0	0	0	0	0
4930500L23Rik	0.0833333	0	0	0	0	1	0	0	0	0	0	0	0	1	0	0	0	0	0	0	0	0	0	0	0	0	0	0	0	0	0	0	0	0	0	0	0	0	0	0	0	0	1	0	0	0	1	0	0
4930502A04Rik	0	0	0	0	0	0	0	0	0	0	0	0	0	0	0	0	0	0	0	0	0	0	0	0	0	0	0	0	0	0	0	0	0	0	0	0	0	0	0	0	0	0	0	0	0	0	0	0	0
4930502E09Rik	1.16667	0	1	0	0	0	4	1	0	2	0	5	3	0	4	2	2	0	0	0	0	3	1	0	4	1	2	1	0	0	2	1	0	2	0	2	0	0	0	0	1	2	0	2	0	2	1	2	2
4930502E18Rik	15.8125	0	34	10	21	0	1	0	55	25	22	0	0	1	73	32	16	3	3	1	20	38	39	6	2	0	7	17	28	3	1	2	15	34	22	1	0	3	21	28	31	2	0	1	52	73	12	3	0
4930503B20Rik	0.479167	0	0	1	0	1	0	0	0	0	0	11	0	0	0	0	0	0	0	2	0	0	0	0	1	2	0	0	0	0	0	0	0	1	0	0	0	0	1	0	0	0	0	0	1	1	0	0	0
4930503E14Rik	14.9375	1	15	4	18	5	11	6	7	7	32	30	29	26	10	13	2	11	3	5	8	10	17	16	18	103	1	8	4	21	26	19	17	8	7	11	27	14	7	8	11	15	2	17	10	7	15	34	7
4930503E24Rik	20.9167	8	8	39	30	41	18	11	21	11	22	8	18	27	30	13	15	17	12	14	26	29	24	27	36	28	15	20	21	27	19	17	18	21	25	25	22	30	12	15	18	22	9	35	21	26	11	31	8
4930503F20Rik	0.0833333	0	0	0	0	0	0	0	0	0	0	0	0	0	0	0	0	0	0	1	1	0	0	0	0	0	0	0	0	1	0	0	0	0	0	0	0	0	0	1	0	0	0	0	0	0	0	0	0
4930503H13Rik	0	0	0	0	0	0	0	0	0	0	0	0	0	0	0	0	0	0	0	0	0	0	0	0	0	0	0	0	0	0	0	0	0	0	0	0	0	0	0	0	0	0	0	0	0	0	0	0	0
4930503L19Rik	49.7083	13	39	26	41	49	66	13	59	32	63	80	66	54	58	37	22	67	52	25	33	58	41	98	117	124	18	29	29	49	45	60	34	31	17	37	36	43	46	46	43	67	51	114	51	46	27	74	48
4930503O07Rik	0.0833333	0	0	0	0	0	0	0	0	0	0	0	0	0	1	0	0	0	0	0	0	0	0	0	0	0	0	1	0	1	0	0	0	0	0	0	0	0	0	0	0	0	0	0	0	0	0	1	0
4930504C09Rik	0.0416667	0	0	0	0	0	0	0	0	0	0	0	0	1	0	0	0	0	0	0	0	0	0	0	0	1	0	0	0	0	0	0	0	0	0	0	0	0	0	0	0	0	0	0	0	0	0	0	0
4930504O13Rik	0	0	0	0	0	0	0	0	0	0	0	0	0	0	0	0	0	0	0	0	0	0	0	0	0	0	0	0	0	0	0	0	0	0	0	0	0	0	0	0	0	0	0	0	0	0	0	0	0
4930505A04Rik	2.89583	0	3	8	2	2	2	0	10	1	6	1	2	3	0	1	1	0	0	4	3	1	10	5	2	3	0	4	4	3	4	2	0	2	2	2	4	4	0	1	1	3	5	8	7	8	0	5	0
4930505G20Rik	0	0	0	0	0	0	0	0	0	0	0	0	0	0	0	0	0	0	0	0	0	0	0	0	0	0	0	0	0	0	0	0	0	0	0	0	0	0	0	0	0	0	0	0	0	0	0	0	0
4930505K13Rik	0.0208333	0	0	0	0	0	0	0	0	0	0	0	0	0	0	0	0	0	1	0	0	0	0	0	0	0	0	0	0	0	0	0	0	0	0	0	0	0	0	0	0	0	0	0	0	0	0	0	0
4930505K14Rik	0.270833	0	4	1	0	0	0	0	0	0	0	0	0	0	1	0	0	0	0	0	0	0	1	0	0	0	2	0	0	0	0	0	0	1	1	0	0	0	0	0	0	0	0	1	0	1	0	0	0
4930506A18Rik	0.0416667	0	0	0	0	0	0	0	0	0	0	0	0	0	0	0	0	0	0	0	0	0	0	0	0	0	0	0	0	0	0	1	1	0	0	0	0	0	0	0	0	0	0	0	0	0	0	0	0
4930506C21Rik	31.1875	13	25	23	18	26	44	17	31	20	39	38	20	32	48	22	24	38	16	22	15	45	42	57	52	13	23	28	32	25	40	35	34	23	21	22	19	26	29	39	21	67	24	74	42	42	25	43	23
4930507D05Rik	1	0	0	0	2	4	1	0	1	0	0	0	0	2	3	1	0	1	1	0	0	0	2	2	0	1	1	0	2	1	2	1	2	2	2	3	0	1	0	0	1	2	0	0	1	0	0	5	1
4930507D10Rik	0	0	0	0	0	0	0	0	0	0	0	0	0	0	0	0	0	0	0	0	0	0	0	0	0	0	0	0	0	0	0	0	0	0	0	0	0	0	0	0	0	0	0	0	0	0	0	0	0
4930509E16Rik	3.41667	0	0	2	3	3	11	4	1	0	6	6	8	3	2	6	0	5	3	0	2	1	1	5	8	0	1	0	4	5	5	3	5	6	2	0	5	1	0	2	7	2	6	6	3	4	3	11	2
4930509J09Rik	0	0	0	0	0	0	0	0	0	0	0	0	0	0	0	0	0	0	0	0	0	0	0	0	0	0	0	0	0	0	0	0	0	0	0	0	0	0	0	0	0	0	0	0	0	0	0	0	0
4930509K18Rik	0	0	0	0	0	0	0	0	0	0	0	0	0	0	0	0	0	0	0	0	0	0	0	0	0	0	0	0	0	0	0	0	0	0	0	0	0	0	0	0	0	0	0	0	0	0	0	0	0
4930511A02Rik	0.0416667	0	0	0	0	0	0	1	0	0	0	0	0	0	0	0	0	0	0	0	0	0	0	0	0	0	0	0	0	0	0	0	0	0	1	0	0	0	0	0	0	0	0	0	0	0	0	0	0
4930511A08Rik	0.604167	0	0	0	0	2	3	0	0	0	2	0	0	1	0	0	0	1	0	1	0	0	2	0	0	0	1	0	0	1	0	0	0	1	0	0	0	1	0	0	0	1	1	7	0	3	0	0	0
4930511E03Rik	0.1875	0	0	0	0	0	0	1	0	0	0	0	0	0	0	0	0	0	1	0	0	0	0	0	0	0	0	0	0	0	1	0	1	0	0	0	0	0	0	0	0	0	0	5	0	0	0	0	0
4930511M06Rik	15.1667	4	15	8	13	21	12	8	5	5	17	43	20	23	20	10	6	18	6	6	19	15	6	37	19	16	4	9	8	14	20	15	4	7	7	22	19	16	11	15	11	16	14	53	17	16	13	18	20
4930512B01Rik	16.3333	2	7	16	10	21	33	7	19	5	24	13	3	20	18	15	10	19	8	17	15	14	10	27	31	4	4	12	11	34	17	27	7	15	9	21	29	21	23	19	13	35	19	41	9	16	4	19	11
4930512J16Rik	0.270833	0	0	0	0	0	0	0	1	0	0	0	1	0	0	0	0	0	1	0	0	0	0	1	0	6	0	0	0	0	0	0	0	0	0	2	0	0	1	0	0	0	0	0	0	0	0	0	0
4930512M02Rik	0.104167	0	0	0	0	0	0	1	0	0	0	0	0	0	0	0	0	0	0	0	0	1	0	0	0	0	0	0	0	0	0	0	0	0	1	1	0	0	0	0	0	1	0	0	0	0	0	0	0
4930513D17Rik	0	0	0	0	0	0	0	0	0	0	0	0	0	0	0	0	0	0	0	0	0	0	0	0	0	0	0	0	0	0	0	0	0	0	0	0	0	0	0	0	0	0	0	0	0	0	0	0	0
4930513N10Rik	4.41667	0	9	2	9	3	6	4	6	5	2	4	4	8	8	7	3	4	1	4	5	3	4	4	5	6	1	5	1	4	4	8	5	1	6	3	3	5	7	3	5	3	1	10	4	3	2	4	8
4930513O06Rik	0	0	0	0	0	0	0	0	0	0	0	0	0	0	0	0	0	0	0	0	0	0	0	0	0	0	0	0	0	0	0	0	0	0	0	0	0	0	0	0	0	0	0	0	0	0	0	0	0
4930515B02Rik	0	0	0	0	0	0	0	0	0	0	0	0	0	0	0	0	0	0	0	0	0	0	0	0	0	0	0	0	0	0	0	0	0	0	0	0	0	0	0	0	0	0	0	0	0	0	0	0	0
4930515G01Rik	21.3125	3	28	28	22	32	24	10	30	11	22	17	3	14	41	29	6	29	8	17	15	11	20	37	30	25	18	11	22	18	20	8	14	33	12	25	16	31	24	23	22	36	15	42	17	29	11	30	22
4930515G16Rik	0.1875	0	0	0	0	0	0	0	0	0	0	0	0	0	0	0	0	0	0	1	0	0	0	0	0	0	0	0	0	2	1	0	0	0	0	0	0	1	0	0	0	0	1	1	0	0	0	0	1
4930515L03Rik	0	0	0	0	0	0	0	0	0	0	0	0	0	0	0	0	0	0	0	0	0	0	0	0	0	0	0	0	0	0	0	0	0	0	0	0	0	0	0	0	0	0	0	0	0	0	0	0	0
4930515L19Rik	0	0	0	0	0	0	0	0	0	0	0	0	0	0	0	0	0	0	0	0	0	0	0	0	0	0	0	0	0	0	0	0	0	0	0	0	0	0	0	0	0	0	0	0	0	0	0	0	0
4930517E11Rik	0.0208333	0	0	0	0	0	0	0	0	0	0	0	0	0	0	0	0	1	0	0	0	0	0	0	0	0	0	0	0	0	0	0	0	0	0	0	0	0	0	0	0	0	0	0	0	0	0	0	0
4930517M08Rik	0.0833333	0	0	0	0	0	0	0	0	0	0	0	0	0	2	0	0	0	0	0	0	0	0	0	1	0	1	0	0	0	0	0	0	0	0	0	0	0	0	0	0	0	0	0	0	0	0	0	0
4930518J21Rik	0.0833333	0	3	0	0	0	0	0	0	0	0	1	0	0	0	0	0	0	0	0	0	0	0	0	0	0	0	0	0	0	0	0	0	0	0	0	0	0	0	0	0	0	0	0	0	0	0	0	0
4930518P08Rik	0.0208333	0	0	0	0	0	0	0	0	0	0	0	0	0	0	0	0	0	0	0	0	0	0	0	0	0	0	0	0	0	0	0	0	0	0	0	0	0	0	0	0	0	0	0	0	1	0	0	0
4930519D14Rik	0	0	0	0	0	0	0	0	0	0	0	0	0	0	0	0	0	0	0	0	0	0	0	0	0	0	0	0	0	0	0	0	0	0	0	0	0	0	0	0	0	0	0	0	0	0	0	0	0
4930519F09Rik	53.9375	14	81	45	62	55	74	30	77	30	73	15	14	44	87	44	25	40	24	44	28	61	52	75	69	24	55	43	69	76	68	83	62	68	42	76	48	68	52	46	61	66	30	98	62	76	33	73	33
4930519F16Rik	0.0208333	0	0	0	0	0	0	0	0	0	0	0	0	0	0	0	0	0	0	0	0	0	0	0	0	0	0	0	0	0	0	0	0	0	1	0	0	0	0	0	0	0	0	0	0	0	0	0	0
4930519F24Rik	0	0	0	0	0	0	0	0	0	0	0	0	0	0	0	0	0	0	0	0	0	0	0	0	0	0	0	0	0	0	0	0	0	0	0	0	0	0	0	0	0	0	0	0	0	0	0	0	0
4930519G04Rik	0.0416667	0	0	0	0	0	0	0	0	0	0	0	0	0	0	0	0	0	0	0	0	0	0	0	0	0	0	0	0	0	0	0	0	0	0	0	0	0	0	0	0	0	1	0	0	1	0	0	0
4930519H02Rik	0.0416667	0	0	0	0	0	0	0	0	0	0	0	0	0	0	0	0	0	0	0	0	0	0	0	1	0	0	0	0	0	0	0	0	0	1	0	0	0	0	0	0	0	0	0	0	0	0	0	0
4930519K11Rik	0	0	0	0	0	0	0	0	0	0	0	0	0	0	0	0	0	0	0	0	0	0	0	0	0	0	0	0	0	0	0	0	0	0	0	0	0	0	0	0	0	0	0	0	0	0	0	0	0
4930520O04Rik	12.0833	1	19	14	17	15	14	7	29	9	22	1	17	8	36	13	4	7	3	6	13	12	7	11	18	11	2	10	15	7	5	10	7	11	11	13	7	15	5	14	13	18	9	16	25	19	10	15	5
4930520P13Rik	0	0	0	0	0	0	0	0	0	0	0	0	0	0	0	0	0	0	0	0	0	0	0	0	0	0	0	0	0	0	0	0	0	0	0	0	0	0	0	0	0	0	0	0	0	0	0	0	0
4930521E06Rik	0.0416667	0	0	0	0	0	1	0	0	0	0	0	0	0	0	0	0	0	0	0	0	0	0	1	0	0	0	0	0	0	0	0	0	0	0	0	0	0	0	0	0	0	0	0	0	0	0	0	0
4930522H14Rik	0.0416667	0	0	1	0	0	0	0	0	0	0	0	0	0	0	0	0	0	0	0	0	0	0	0	0	0	1	0	0	0	0	0	0	0	0	0	0	0	0	0	0	0	0	0	0	0	0	0	0
4930522O17Rik	0.125	0	0	0	0	0	0	0	0	0	0	0	0	0	0	0	0	0	0	1	0	2	0	0	0	0	0	0	0	0	0	0	0	0	0	0	0	1	0	0	1	0	1	0	0	0	0	0	0
4930523C07Rik	149.146	47	137	113	135	214	209	67	136	54	145	151	154	103	239	119	80	203	111	129	114	167	160	269	189	402	48	95	96	148	174	154	183	114	82	172	92	88	96	139	131	234	156	362	181	218	76	184	89
4930523O13Rik	0	0	0	0	0	0	0	0	0	0	0	0	0	0	0	0	0	0	0	0	0	0	0	0	0	0	0	0	0	0	0	0	0	0	0	0	0	0	0	0	0	0	0	0	0	0	0	0	0
4930524B15Rik	0.125	0	0	0	0	0	1	0	0	0	0	0	0	0	0	0	0	1	0	0	0	0	0	0	2	0	0	0	0	0	0	0	0	0	1	0	0	0	1	0	0	0	0	0	0	0	0	0	0
4930524B17Rik	0	0	0	0	0	0	0	0	0	0	0	0	0	0	0	0	0	0	0	0	0	0	0	0	0	0	0	0	0	0	0	0	0	0	0	0	0	0	0	0	0	0	0	0	0	0	0	0	0
4930524C18Rik	0.0208333	0	0	0	0	0	0	0	0	0	0	0	0	0	0	0	0	0	0	0	0	0	0	0	0	0	0	0	0	0	0	0	0	1	0	0	0	0	0	0	0	0	0	0	0	0	0	0	0
4930524N10Rik	3.77083	0	8	2	7	0	0	0	6	2	3	2	3	3	6	4	3	3	3	1	5	7	2	6	1	2	7	3	5	0	0	1	3	6	6	4	3	3	1	7	4	4	0	9	8	8	9	1	8
4930524O05Rik	0.3125	0	7	0	0	2	0	0	0	0	0	0	0	0	0	0	0	0	0	0	1	0	0	0	0	0	0	0	0	0	0	0	0	0	0	1	1	0	0	2	1	0	0	0	0	0	0	0	0
4930524O08Rik	0	0	0	0	0	0	0	0	0	0	0	0	0	0	0	0	0	0	0	0	0	0	0	0	0	0	0	0	0	0	0	0	0	0	0	0	0	0	0	0	0	0	0	0	0	0	0	0	0
4930525C09Rik	0	0	0	0	0	0	0	0	0	0	0	0	0	0	0	0	0	0	0	0	0	0	0	0	0	0	0	0	0	0	0	0	0	0	0	0	0	0	0	0	0	0	0	0	0	0	0	0	0
4930525D18Rik	0.270833	0	0	0	0	0	1	0	0	0	2	0	1	0	0	0	0	0	0	0	0	0	0	0	0	0	0	1	0	0	1	0	1	0	4	0	0	1	0	0	0	0	0	0	0	0	0	1	0
4930525G20Rik	12.0208	2	31	7	13	13	18	8	18	2	18	22	8	9	11	15	5	15	4	17	11	3	10	15	11	8	6	4	14	16	13	18	5	13	7	13	13	14	7	7	6	17	14	33	15	15	9	19	3
4930526H09Rik	0	0	0	0	0	0	0	0	0	0	0	0	0	0	0	0	0	0	0	0	0	0	0	0	0	0	0	0	0	0	0	0	0	0	0	0	0	0	0	0	0	0	0	0	0	0	0	0	0
4930526I15Rik	137.5	59	107	175	163	215	191	59	219	60	166	275	184	162	204	123	66	120	71	87	144	103	175	247	288	201	74	90	88	124	130	110	91	123	107	112	110	131	87	98	101	115	69	249	180	165	68	193	100
4930526L06Rik	4.58333	0	9	3	6	7	4	1	3	4	7	7	3	3	7	3	7	5	2	2	9	3	2	7	5	1	0	9	8	4	5	4	2	1	2	6	2	0	5	4	9	3	4	12	5	2	4	10	5
4930527F14Rik	0.354167	0	0	0	0	0	0	0	0	1	0	0	0	0	0	0	0	0	0	0	0	5	0	0	0	0	0	0	0	1	3	1	1	0	0	1	1	0	0	0	0	0	0	0	0	2	0	1	0
4930527G23Rik	0	0	0	0	0	0	0	0	0	0	0	0	0	0	0	0	0	0	0	0	0	0	0	0	0	0	0	0	0	0	0	0	0	0	0	0	0	0	0	0	0	0	0	0	0	0	0	0	0
4930528A17Rik	2.6875	0	12	1	0	5	5	2	0	2	0	0	1	2	8	0	0	1	0	0	3	7	2	7	4	0	1	6	5	4	3	6	4	2	2	3	2	2	2	4	0	4	0	1	3	4	1	3	3
4930528D03Rik	0.125	0	0	0	0	1	0	0	0	1	0	0	0	0	0	0	0	0	0	0	0	0	0	0	0	0	0	0	0	0	0	0	2	0	1	0	0	0	0	0	0	0	0	1	0	0	0	0	0
4930528G23Rik	0.708333	0	0	1	0	1	0	0	0	0	1	0	0	1	0	1	0	1	0	0	0	4	1	1	2	0	2	0	1	0	1	0	1	0	1	2	1	2	0	0	1	1	3	1	1	1	0	0	1
4930528H21Rik	0.0416667	0	0	0	0	0	0	0	0	0	0	0	0	0	0	0	0	0	0	0	0	0	0	1	0	0	0	0	0	0	0	0	0	0	0	0	0	0	0	0	0	0	0	1	0	0	0	0	0
4930528P14Rik	0.0208333	0	0	0	0	0	0	0	0	0	0	0	0	0	0	0	0	0	0	0	0	0	0	0	0	0	0	0	0	0	0	0	0	0	0	0	1	0	0	0	0	0	0	0	0	0	0	0	0
4930529C04Rik	58.5208	19	52	47	62	61	54	25	50	25	60	50	44	47	103	58	24	93	39	46	41	47	62	135	103	47	19	47	72	53	80	98	64	78	39	56	33	51	42	69	73	80	54	173	52	53	33	60	30
4930529K09Rik	0	0	0	0	0	0	0	0	0	0	0	0	0	0	0	0	0	0	0	0	0	0	0	0	0	0	0	0	0	0	0	0	0	0	0	0	0	0	0	0	0	0	0	0	0	0	0	0	0
4930529L06Rik	0	0	0	0	0	0	0	0	0	0	0	0	0	0	0	0	0	0	0	0	0	0	0	0	0	0	0	0	0	0	0	0	0	0	0	0	0	0	0	0	0	0	0	0	0	0	0	0	0
4930532I03Rik	0.333333	0	0	0	0	1	1	0	0	1	0	5	1	0	0	0	0	1	0	0	0	0	0	0	1	0	1	0	0	0	0	0	0	0	0	0	1	0	0	0	0	0	0	1	0	0	0	1	1
4930532M18Rik	0	0	0	0	0	0	0	0	0	0	0	0	0	0	0	0	0	0	0	0	0	0	0	0	0	0	0	0	0	0	0	0	0	0	0	0	0	0	0	0	0	0	0	0	0	0	0	0	0
4930533B01Rik	1.1875	0	0	1	1	1	6	0	0	0	2	0	3	0	0	1	0	2	0	2	3	1	4	2	2	0	0	1	0	2	0	3	1	1	0	4	1	0	2	0	0	0	1	2	1	2	1	3	1
4930533N22Rik	0	0	0	0	0	0	0	0	0	0	0	0	0	0	0	0	0	0	0	0	0	0	0	0	0	0	0	0	0	0	0	0	0	0	0	0	0	0	0	0	0	0	0	0	0	0	0	0	0
4930533P14Rik	0	0	0	0	0	0	0	0	0	0	0	0	0	0	0	0	0	0	0	0	0	0	0	0	0	0	0	0	0	0	0	0	0	0	0	0	0	0	0	0	0	0	0	0	0	0	0	0	0
4930538K18Rik	3.39583	0	1	1	4	1	3	0	6	0	4	10	3	4	10	3	1	4	0	0	5	5	3	4	9	4	2	4	3	2	6	7	2	3	2	1	2	2	2	2	3	4	4	8	4	8	2	4	0
4930539C22Rik	0	0	0	0	0	0	0	0	0	0	0	0	0	0	0	0	0	0	0	0	0	0	0	0	0	0	0	0	0	0	0	0	0	0	0	0	0	0	0	0	0	0	0	0	0	0	0	0	0
4930539E08Rik	19.1667	3	57	29	16	30	15	8	16	5	27	19	6	18	29	11	9	12	3	11	16	11	12	16	15	27	9	26	22	35	23	25	26	26	19	14	19	24	14	20	13	28	10	40	33	11	11	30	15
4930539J05Rik	67.6042	17	88	116	118	103	108	18	118	39	76	17	36	58	122	84	38	55	38	47	62	57	97	110	79	48	52	46	87	69	75	73	57	71	64	64	62	71	57	52	66	61	30	104	66	102	34	76	35
4930539M17Rik	0.0208333	0	0	0	0	0	0	0	0	0	0	0	0	0	0	0	0	0	0	0	1	0	0	0	0	0	0	0	0	0	0	0	0	0	0	0	0	0	0	0	0	0	0	0	0	0	0	0	0
4930539N22Rik	0.0208333	0	0	0	0	0	0	0	0	1	0	0	0	0	0	0	0	0	0	0	0	0	0	0	0	0	0	0	0	0	0	0	0	0	0	0	0	0	0	0	0	0	0	0	0	0	0	0	0
4930540M03Rik	0.0625	0	0	0	0	0	0	1	0	0	0	0	0	0	0	0	0	0	0	0	0	0	0	0	0	0	0	0	0	0	1	0	0	0	0	0	0	0	0	0	0	1	0	0	0	0	0	0	0
4930542C21Rik	0	0	0	0	0	0	0	0	0	0	0	0	0	0	0	0	0	0	0	0	0	0	0	0	0	0	0	0	0	0	0	0	0	0	0	0	0	0	0	0	0	0	0	0	0	0	0	0	0
4930542D17Rik	0.916667	0	1	1	0	2	1	0	5	0	0	2	0	0	6	1	2	1	0	0	0	0	2	4	2	0	0	0	0	2	2	0	2	0	1	0	1	0	1	0	0	1	0	0	1	0	1	1	0
4930543E12Rik	0.104167	0	0	0	0	0	0	0	0	0	0	0	0	1	0	0	0	0	0	0	0	0	0	0	0	0	0	0	0	0	0	0	2	0	0	0	0	0	0	1	0	0	0	0	0	0	0	1	0
4930543N07Rik	0	0	0	0	0	0	0	0	0	0	0	0	0	0	0	0	0	0	0	0	0	0	0	0	0	0	0	0	0	0	0	0	0	0	0	0	0	0	0	0	0	0	0	0	0	0	0	0	0
4930544D05Rik	0.979167	0	1	1	2	0	2	1	0	0	0	0	1	0	0	0	1	0	1	1	1	0	3	3	1	1	1	0	1	3	2	0	0	0	0	4	0	5	0	0	0	0	0	2	2	0	0	4	0
4930544G11Rik	0	0	0	0	0	0	0	0	0	0	0	0	0	0	0	0	0	0	0	0	0	0	0	0	0	0	0	0	0	0	0	0	0	0	0	0	0	0	0	0	0	0	0	0	0	0	0	0	0
4930544M13Rik	0	0	0	0	0	0	0	0	0	0	0	0	0	0	0	0	0	0	0	0	0	0	0	0	0	0	0	0	0	0	0	0	0	0	0	0	0	0	0	0	0	0	0	0	0	0	0	0	0
4930545E07Rik	0	0	0	0	0	0	0	0	0	0	0	0	0	0	0	0	0	0	0	0	0	0	0	0	0	0	0	0	0	0	0	0	0	0	0	0	0	0	0	0	0	0	0	0	0	0	0	0	0
4930545H06Rik	0.541667	0	0	2	9	0	0	0	0	1	0	0	0	0	3	0	1	0	0	0	0	0	3	0	0	0	0	4	2	0	0	0	0	0	0	0	0	0	1	0	0	0	0	0	0	0	0	0	0
4930545L23Rik	0.125	0	0	0	0	0	0	0	0	0	0	0	0	0	0	0	0	0	0	0	0	0	0	0	0	0	0	1	0	0	0	0	0	0	0	1	1	0	0	1	0	0	0	0	0	0	0	2	0
4930546C10Rik	0	0	0	0	0	0	0	0	0	0	0	0	0	0	0	0	0	0	0	0	0	0	0	0	0	0	0	0	0	0	0	0	0	0	0	0	0	0	0	0	0	0	0	0	0	0	0	0	0
4930546K05Rik	0.958333	0	0	0	0	0	0	1	0	0	0	0	1	0	5	0	2	7	0	0	5	0	1	1	2	0	0	0	0	0	0	0	4	0	1	0	0	0	4	1	1	3	0	1	1	4	0	0	1
4930547E08Rik	0.8125	0	0	0	0	2	2	0	0	3	1	0	1	0	2	1	0	1	0	0	3	0	0	0	5	0	1	0	0	3	0	2	0	0	3	0	1	0	1	1	0	0	0	1	2	1	0	1	1
4930547E14Rik	0.0416667	0	0	0	0	0	0	0	0	0	0	2	0	0	0	0	0	0	0	0	0	0	0	0	0	0	0	0	0	0	0	0	0	0	0	0	0	0	0	0	0	0	0	0	0	0	0	0	0
4930548G14Rik	0	0	0	0	0	0	0	0	0	0	0	0	0	0	0	0	0	0	0	0	0	0	0	0	0	0	0	0	0	0	0	0	0	0	0	0	0	0	0	0	0	0	0	0	0	0	0	0	0
4930548H24Rik	0.375	0	0	0	0	0	0	0	0	0	0	3	0	1	0	0	0	0	0	0	0	1	3	2	0	0	0	0	0	0	0	0	1	0	0	0	0	0	0	1	1	0	0	0	0	4	0	1	0
4930548J01Rik	0.25	0	0	0	1	0	1	0	0	0	2	0	1	1	0	0	0	0	0	1	0	0	0	0	1	0	0	0	0	2	0	0	0	0	0	0	0	0	1	0	0	0	0	0	1	0	0	0	0
4930548K13Rik	0	0	0	0	0	0	0	0	0	0	0	0	0	0	0	0	0	0	0	0	0	0	0	0	0	0	0	0	0	0	0	0	0	0	0	0	0	0	0	0	0	0	0	0	0	0	0	0	0
4930549C01Rik	0	0	0	0	0	0	0	0	0	0	0	0	0	0	0	0	0	0	0	0	0	0	0	0	0	0	0	0	0	0	0	0	0	0	0	0	0	0	0	0	0	0	0	0	0	0	0	0	0
4930549C15Rik	1.29167	0	0	0	0	2	0	1	2	2	0	10	5	0	2	1	0	1	0	1	1	5	1	0	0	2	1	1	2	2	1	1	0	1	0	0	1	2	2	0	1	2	1	1	2	0	2	1	1
4930549G23Rik	0.5625	0	2	3	2	1	0	0	0	1	0	0	0	0	1	2	0	0	0	0	0	4	0	1	1	0	0	0	0	0	1	0	0	1	0	1	0	0	2	0	0	0	1	2	0	1	0	0	0
4930550C14Rik	39.7917	7	54	31	37	50	79	20	36	13	39	61	58	44	54	34	14	54	21	32	17	48	20	70	71	7	21	32	30	43	43	43	31	40	18	45	38	39	29	37	43	46	30	103	40	43	20	57	39
4930550C17Rik	0	0	0	0	0	0	0	0	0	0	0	0	0	0	0	0	0	0	0	0	0	0	0	0	0	0	0	0	0	0	0	0	0	0	0	0	0	0	0	0	0	0	0	0	0	0	0	0	0
4930550L24Rik	0.125	0	0	1	0	0	0	0	0	0	0	0	0	0	0	0	0	0	0	0	1	0	0	0	0	0	0	1	2	0	0	0	0	0	0	0	0	0	0	0	0	0	0	0	0	1	0	0	0
4930552N02Rik	0	0	0	0	0	0	0	0	0	0	0	0	0	0	0	0	0	0	0	0	0	0	0	0	0	0	0	0	0	0	0	0	0	0	0	0	0	0	0	0	0	0	0	0	0	0	0	0	0
4930552P12Rik	1.75	0	4	1	2	3	3	0	0	0	1	0	1	1	3	3	2	0	0	3	1	4	2	3	2	7	1	3	0	2	1	0	0	4	0	1	1	1	0	1	1	1	2	1	5	5	0	5	1
4930553C11Rik	0	0	0	0	0	0	0	0	0	0	0	0	0	0	0	0	0	0	0	0	0	0	0	0	0	0	0	0	0	0	0	0	0	0	0	0	0	0	0	0	0	0	0	0	0	0	0	0	0
4930553E22Rik	0.0208333	0	0	0	0	0	0	0	0	0	0	0	0	0	0	0	0	0	0	0	0	0	0	0	0	0	0	0	0	0	0	0	1	0	0	0	0	0	0	0	0	0	0	0	0	0	0	0	0
4930554C24Rik	0	0	0	0	0	0	0	0	0	0	0	0	0	0	0	0	0	0	0	0	0	0	0	0	0	0	0	0	0	0	0	0	0	0	0	0	0	0	0	0	0	0	0	0	0	0	0	0	0
4930554G24Rik	0.0833333	0	0	0	0	0	0	0	0	0	0	0	2	0	0	0	0	0	0	0	0	0	0	0	0	0	0	0	0	0	1	0	0	0	0	0	0	0	0	0	0	0	0	0	0	0	1	0	0
4930554H23Rik	0	0	0	0	0	0	0	0	0	0	0	0	0	0	0	0	0	0	0	0	0	0	0	0	0	0	0	0	0	0	0	0	0	0	0	0	0	0	0	0	0	0	0	0	0	0	0	0	0
4930554I06Rik	0.104167	0	0	0	0	0	1	0	0	0	0	0	0	0	0	0	0	0	0	0	0	0	0	0	0	0	0	0	0	0	0	0	2	0	0	0	0	0	1	0	0	1	0	0	0	0	0	0	0
4930555B11Rik	0	0	0	0	0	0	0	0	0	0	0	0	0	0	0	0	0	0	0	0	0	0	0	0	0	0	0	0	0	0	0	0	0	0	0	0	0	0	0	0	0	0	0	0	0	0	0	0	0
4930555B12Rik	0	0	0	0	0	0	0	0	0	0	0	0	0	0	0	0	0	0	0	0	0	0	0	0	0	0	0	0	0	0	0	0	0	0	0	0	0	0	0	0	0	0	0	0	0	0	0	0	0
4930555G01Rik	0.708333	0	2	0	0	0	1	0	0	1	0	2	0	2	1	0	1	1	0	0	0	4	0	0	0	3	0	1	1	2	0	0	2	1	0	4	0	2	0	0	0	0	0	0	2	0	0	0	1
4930555G21Rik	0	0	0	0	0	0	0	0	0	0	0	0	0	0	0	0	0	0	0	0	0	0	0	0	0	0	0	0	0	0	0	0	0	0	0	0	0	0	0	0	0	0	0	0	0	0	0	0	0
4930555K05Rik	0	0	0	0	0	0	0	0	0	0	0	0	0	0	0	0	0	0	0	0	0	0	0	0	0	0	0	0	0	0	0	0	0	0	0	0	0	0	0	0	0	0	0	0	0	0	0	0	0
4930556C24Rik	0	0	0	0	0	0	0	0	0	0	0	0	0	0	0	0	0	0	0	0	0	0	0	0	0	0	0	0	0	0	0	0	0	0	0	0	0	0	0	0	0	0	0	0	0	0	0	0	0
4930556G01Rik	0	0	0	0	0	0	0	0	0	0	0	0	0	0	0	0	0	0	0	0	0	0	0	0	0	0	0	0	0	0	0	0	0	0	0	0	0	0	0	0	0	0	0	0	0	0	0	0	0
4930556J02Rik	0	0	0	0	0	0	0	0	0	0	0	0	0	0	0	0	0	0	0	0	0	0	0	0	0	0	0	0	0	0	0	0	0	0	0	0	0	0	0	0	0	0	0	0	0	0	0	0	0
4930556M19Rik	103.083	38	139	73	118	105	139	38	136	66	127	99	75	81	203	100	74	92	56	67	78	87	112	145	160	44	77	105	106	126	151	132	100	139	97	78	85	59	100	108	105	118	76	226	132	110	57	138	55
4930556N09Rik	0	0	0	0	0	0	0	0	0	0	0	0	0	0	0	0	0	0	0	0	0	0	0	0	0	0	0	0	0	0	0	0	0	0	0	0	0	0	0	0	0	0	0	0	0	0	0	0	0
4930556N13Rik	1.14583	0	1	1	4	1	1	1	0	0	0	4	0	1	0	5	1	1	2	0	0	0	3	1	2	1	3	1	1	2	0	0	2	0	1	1	1	1	0	2	0	1	1	1	2	0	0	3	2
4930557A04Rik	0.0416667	0	0	0	0	0	0	0	0	0	1	0	0	0	0	0	0	0	0	0	0	0	0	0	0	0	0	0	0	0	1	0	0	0	0	0	0	0	0	0	0	0	0	0	0	0	0	0	0
4930557F10Rik	0	0	0	0	0	0	0	0	0	0	0	0	0	0	0	0	0	0	0	0	0	0	0	0	0	0	0	0	0	0	0	0	0	0	0	0	0	0	0	0	0	0	0	0	0	0	0	0	0
4930557J02Rik	0.0208333	0	0	0	0	0	0	0	0	0	0	0	0	0	0	0	1	0	0	0	0	0	0	0	0	0	0	0	0	0	0	0	0	0	0	0	0	0	0	0	0	0	0	0	0	0	0	0	0
4930557K07Rik	11.1042	1	6	6	6	7	10	11	17	8	15	28	12	9	22	6	6	16	5	12	4	8	13	34	17	12	1	10	8	12	4	18	6	13	5	6	9	5	8	9	9	19	4	33	11	15	8	17	6
4930558C23Rik	0.0208333	0	0	0	0	0	0	0	0	0	0	0	0	0	0	0	0	0	0	0	0	0	0	0	0	0	0	0	0	0	1	0	0	0	0	0	0	0	0	0	0	0	0	0	0	0	0	0	0
4930558F17Rik	0	0	0	0	0	0	0	0	0	0	0	0	0	0	0	0	0	0	0	0	0	0	0	0	0	0	0	0	0	0	0	0	0	0	0	0	0	0	0	0	0	0	0	0	0	0	0	0	0
4930558G05Rik	0.145833	0	0	0	0	0	0	1	0	0	1	0	0	0	0	0	0	1	0	0	0	0	0	1	0	0	0	0	1	0	0	0	1	0	0	0	0	0	0	0	0	0	0	0	0	1	0	0	0
4930558J18Rik	0.208333	0	0	0	0	0	0	0	0	0	3	0	0	0	0	0	0	0	0	0	0	0	0	0	0	1	0	0	0	1	0	0	1	0	0	1	0	0	0	2	0	1	0	0	0	0	0	0	0
4930558K02Rik	0.229167	0	0	0	0	0	0	0	1	0	1	0	0	0	0	0	0	0	0	0	1	0	0	1	1	0	0	0	0	0	0	0	0	0	0	1	0	0	0	0	1	0	0	2	1	0	0	1	0
4930559C10Rik	0	0	0	0	0	0	0	0	0	0	0	0	0	0	0	0	0	0	0	0	0	0	0	0	0	0	0	0	0	0	0	0	0	0	0	0	0	0	0	0	0	0	0	0	0	0	0	0	0
4930562C15Rik	3.5625	0	4	2	2	5	0	0	2	0	13	3	6	4	5	4	1	5	4	1	0	2	1	9	6	3	0	1	2	3	5	1	24	3	1	8	2	1	1	3	8	1	6	5	3	3	3	2	1
4930562F07Rik	1.08333	0	3	1	0	1	2	0	0	1	0	5	0	0	1	1	0	0	0	0	2	0	1	1	0	6	0	0	0	1	1	2	3	0	1	1	0	0	1	2	1	2	0	3	1	2	0	3	2
4930563D23Rik	28.0417	1	25	25	22	40	42	13	14	1	37	52	47	33	49	15	8	32	10	22	19	5	27	62	69	13	16	11	12	30	32	43	29	21	12	19	27	32	13	18	26	34	16	80	37	26	29	55	21
4930563E18Rik	1.35417	0	8	0	0	1	2	1	0	0	0	0	1	1	8	0	1	2	0	1	0	0	3	1	0	1	0	3	1	1	0	3	0	0	2	1	2	0	1	1	3	3	2	2	0	1	1	3	1
4930563E22Rik	11.7292	3	10	10	10	17	17	7	12	6	19	13	14	9	13	11	4	17	14	9	5	7	11	23	21	10	3	3	8	15	12	12	19	6	13	15	8	10	3	6	6	15	15	35	12	13	5	15	9
4930563F08Rik	0.0833333	0	0	0	0	0	1	0	0	0	0	0	0	0	0	0	0	0	0	0	0	0	0	0	0	0	0	0	0	0	0	0	0	0	0	0	0	0	0	0	0	0	0	1	0	0	0	2	0
4930563H07Rik	0	0	0	0	0	0	0	0	0	0	0	0	0	0	0	0	0	0	0	0	0	0	0	0	0	0	0	0	0	0	0	0	0	0	0	0	0	0	0	0	0	0	0	0	0	0	0	0	0
4930563M20Rik	0.0208333	0	0	0	0	0	0	0	0	0	0	0	0	0	0	0	1	0	0	0	0	0	0	0	0	0	0	0	0	0	0	0	0	0	0	0	0	0	0	0	0	0	0	0	0	0	0	0	0
4930563M21Rik	0.875	0	2	0	0	3	2	0	0	0	1	4	2	0	0	1	0	0	0	0	0	3	0	7	5	2	0	1	1	0	2	0	1	0	0	0	2	0	0	0	0	2	0	0	0	0	0	0	1
4930564B18Rik	14.7708	1	12	13	17	21	5	4	32	15	27	8	24	10	20	26	17	24	11	9	17	19	34	16	8	1	15	12	14	6	10	9	17	14	17	26	9	14	12	12	13	11	8	26	17	16	9	19	8
4930564C03Rik	0	0	0	0	0	0	0	0	0	0	0	0	0	0	0	0	0	0	0	0	0	0	0	0	0	0	0	0	0	0	0	0	0	0	0	0	0	0	0	0	0	0	0	0	0	0	0	0	0
4930564D02Rik	0	0	0	0	0	0	0	0	0	0	0	0	0	0	0	0	0	0	0	0	0	0	0	0	0	0	0	0	0	0	0	0	0	0	0	0	0	0	0	0	0	0	0	0	0	0	0	0	0
4930565D16Rik	0	0	0	0	0	0	0	0	0	0	0	0	0	0	0	0	0	0	0	0	0	0	0	0	0	0	0	0	0	0	0	0	0	0	0	0	0	0	0	0	0	0	0	0	0	0	0	0	0
4930565N06Rik	0.270833	0	0	0	0	0	0	0	0	1	0	4	0	0	2	0	0	0	0	1	0	0	0	0	1	1	0	0	0	0	0	0	0	1	0	0	0	0	0	0	0	0	0	0	1	0	0	1	0
4930567H12Rik	0	0	0	0	0	0	0	0	0	0	0	0	0	0	0	0	0	0	0	0	0	0	0	0	0	0	0	0	0	0	0	0	0	0	0	0	0	0	0	0	0	0	0	0	0	0	0	0	0
4930567H17Rik	0	0	0	0	0	0	0	0	0	0	0	0	0	0	0	0	0	0	0	0	0	0	0	0	0	0	0	0	0	0	0	0	0	0	0	0	0	0	0	0	0	0	0	0	0	0	0	0	0
4930567J20Rik	0	0	0	0	0	0	0	0	0	0	0	0	0	0	0	0	0	0	0	0	0	0	0	0	0	0	0	0	0	0	0	0	0	0	0	0	0	0	0	0	0	0	0	0	0	0	0	0	0
4930567K12Rik	0	0	0	0	0	0	0	0	0	0	0	0	0	0	0	0	0	0	0	0	0	0	0	0	0	0	0	0	0	0	0	0	0	0	0	0	0	0	0	0	0	0	0	0	0	0	0	0	0
4930567K20Rik	0.0208333	0	0	0	0	0	0	0	0	0	0	0	0	0	0	0	0	0	0	0	0	0	0	0	0	0	0	0	0	0	0	0	0	0	0	0	0	0	0	0	0	0	0	0	0	0	0	1	0
4930568D16Rik	0.0208333	0	0	0	1	0	0	0	0	0	0	0	0	0	0	0	0	0	0	0	0	0	0	0	0	0	0	0	0	0	0	0	0	0	0	0	0	0	0	0	0	0	0	0	0	0	0	0	0
4930568E12Rik	0	0	0	0	0	0	0	0	0	0	0	0	0	0	0	0	0	0	0	0	0	0	0	0	0	0	0	0	0	0	0	0	0	0	0	0	0	0	0	0	0	0	0	0	0	0	0	0	0
4930568G15Rik	0	0	0	0	0	0	0	0	0	0	0	0	0	0	0	0	0	0	0	0	0	0	0	0	0	0	0	0	0	0	0	0	0	0	0	0	0	0	0	0	0	0	0	0	0	0	0	0	0
4930570G19Rik	1.875	0	0	6	1	5	8	1	6	1	3	0	2	0	3	1	0	1	0	1	1	2	4	2	1	3	0	5	0	1	3	2	2	0	0	5	1	1	1	2	1	0	0	3	2	2	1	4	2
4930571K23Rik	0	0	0	0	0	0	0	0	0	0	0	0	0	0	0	0	0	0	0	0	0	0	0	0	0	0	0	0	0	0	0	0	0	0	0	0	0	0	0	0	0	0	0	0	0	0	0	0	0
4930571O06Rik	0	0	0	0	0	0	0	0	0	0	0	0	0	0	0	0	0	0	0	0	0	0	0	0	0	0	0	0	0	0	0	0	0	0	0	0	0	0	0	0	0	0	0	0	0	0	0	0	0
4930572K03Rik	0	0	0	0	0	0	0	0	0	0	0	0	0	0	0	0	0	0	0	0	0	0	0	0	0	0	0	0	0	0	0	0	0	0	0	0	0	0	0	0	0	0	0	0	0	0	0	0	0
4930572O03Rik	48.25	0	6	0	3	2	1	0	66	38	114	104	148	102	18	23	10	40	20	30	16	45	39	138	148	1	0	0	3	1	1	4	70	55	37	229	61	144	11	10	12	54	33	117	30	64	34	126	54
4930572O13Rik	0.0208333	0	0	0	0	1	0	0	0	0	0	0	0	0	0	0	0	0	0	0	0	0	0	0	0	0	0	0	0	0	0	0	0	0	0	0	0	0	0	0	0	0	0	0	0	0	0	0	0
4930573O16Rik	0	0	0	0	0	0	0	0	0	0	0	0	0	0	0	0	0	0	0	0	0	0	0	0	0	0	0	0	0	0	0	0	0	0	0	0	0	0	0	0	0	0	0	0	0	0	0	0	0
4930577N17Rik	14.2917	3	17	9	24	16	7	3	16	7	27	12	20	17	14	12	8	10	8	10	13	4	19	14	24	16	12	19	11	16	15	17	15	14	10	18	15	10	12	10	6	16	6	32	25	25	9	23	9
4930578C19Rik	3.29167	0	0	2	5	3	7	1	6	0	6	3	2	1	6	0	4	11	1	3	1	0	1	3	6	7	1	0	1	2	3	8	2	5	5	3	2	3	5	4	1	4	2	9	6	3	1	4	1
4930578E11Rik	1.25	0	4	2	4	1	1	0	2	0	1	0	0	2	1	1	0	1	0	0	0	1	0	2	1	5	3	1	0	1	0	2	2	2	0	5	3	2	1	1	0	0	0	2	2	1	1	1	0
4930578I06Rik	0	0	0	0	0	0	0	0	0	0	0	0	0	0	0	0	0	0	0	0	0	0	0	0	0	0	0	0	0	0	0	0	0	0	0	0	0	0	0	0	0	0	0	0	0	0	0	0	0
4930578M01Rik	1.27083	0	1	2	0	1	4	2	0	0	0	0	2	2	3	2	1	1	0	2	1	3	0	6	3	0	1	2	0	3	1	0	0	1	0	0	1	0	2	1	3	3	0	2	0	1	2	0	2
4930578N18Rik	0.0208333	0	0	0	0	0	0	0	0	0	0	0	0	0	0	0	0	0	0	0	0	0	0	0	1	0	0	0	0	0	0	0	0	0	0	0	0	0	0	0	0	0	0	0	0	0	0	0	0
4930579F01Rik	1.25	0	5	3	3	0	1	0	3	1	3	0	0	0	0	1	0	1	0	1	2	0	2	0	1	0	4	4	4	0	0	1	2	2	2	0	0	0	1	2	0	2	0	0	2	3	2	0	2
4930579G18Rik	25.4375	7	26	16	28	25	27	8	31	13	47	37	10	16	33	37	21	31	18	25	22	22	21	67	51	27	15	12	9	9	21	24	39	35	13	22	10	22	25	35	31	51	21	74	23	30	9	14	11
4930579G24Rik	20.2917	5	22	21	16	32	17	10	16	6	21	5	10	11	25	11	5	31	11	9	20	34	30	28	24	49	15	14	15	20	18	23	15	24	15	25	15	16	16	13	30	22	21	49	25	36	22	24	24
4930579H20Rik	0.875	0	0	0	1	0	2	0	0	1	7	5	4	0	1	1	1	3	0	1	0	3	1	2	0	5	0	0	0	1	0	0	0	0	0	0	1	0	0	0	0	0	0	0	0	2	0	0	0
4930579J19Rik	5.54167	0	3	6	6	0	5	2	11	10	9	11	1	4	10	4	2	5	1	3	3	4	13	8	35	15	3	0	0	5	8	3	9	6	3	2	3	11	1	2	6	1	2	5	5	8	3	4	3
4930579K19Rik	11.5833	2	2	8	12	16	10	3	13	8	11	19	14	10	9	14	4	11	5	10	6	10	17	24	14	20	10	8	3	17	12	16	7	11	6	8	12	9	9	11	6	15	10	36	15	14	13	16	10
4930579P08Rik	0.166667	0	0	0	0	0	2	0	0	0	0	0	4	0	0	0	0	0	0	0	0	0	0	0	0	0	0	0	0	1	0	0	0	0	0	0	0	0	0	0	1	0	0	0	0	0	0	0	0
4930581F22Rik	41.0417	12	27	25	44	54	63	12	54	21	58	99	62	36	60	26	16	44	26	34	21	27	50	95	70	58	28	22	19	40	47	54	38	22	27	45	29	21	22	22	22	56	34	79	50	39	21	79	34
4930583K01Rik	0.458333	0	0	2	0	0	0	1	0	0	2	0	0	1	0	1	0	0	0	1	0	0	0	0	0	0	0	2	0	0	0	1	1	1	1	1	0	0	1	2	0	2	0	2	0	0	0	0	0
4930583P06Rik	0.0208333	0	0	0	0	0	0	0	0	0	0	0	0	0	0	0	0	0	0	0	0	0	0	0	0	0	0	0	0	0	0	0	0	0	0	0	0	0	0	0	0	0	0	0	0	0	0	1	0
4930584F24Rik	0	0	0	0	0	0	0	0	0	0	0	0	0	0	0	0	0	0	0	0	0	0	0	0	0	0	0	0	0	0	0	0	0	0	0	0	0	0	0	0	0	0	0	0	0	0	0	0	0
4930586N03Rik	0	0	0	0	0	0	0	0	0	0	0	0	0	0	0	0	0	0	0	0	0	0	0	0	0	0	0	0	0	0	0	0	0	0	0	0	0	0	0	0	0	0	0	0	0	0	0	0	0
4930587E11Rik	0	0	0	0	0	0	0	0	0	0	0	0	0	0	0	0	0	0	0	0	0	0	0	0	0	0	0	0	0	0	0	0	0	0	0	0	0	0	0	0	0	0	0	0	0	0	0	0	0
4930590J08Rik	0.895833	0	0	0	0	1	2	0	1	0	0	0	3	0	0	6	2	0	0	2	0	1	1	2	0	0	1	0	2	0	1	3	0	3	0	0	0	3	0	0	2	0	3	1	1	0	1	0	1
4930590L20Rik	0.0208333	0	0	0	0	0	0	0	0	0	1	0	0	0	0	0	0	0	0	0	0	0	0	0	0	0	0	0	0	0	0	0	0	0	0	0	0	0	0	0	0	0	0	0	0	0	0	0	0
4930591A17Rik	0.125	0	1	0	0	0	0	0	0	2	0	0	1	0	0	0	0	0	0	0	0	0	0	0	0	0	0	0	0	1	0	0	0	0	0	0	0	0	0	0	0	0	0	0	0	0	0	0	1
4930591E09Rik	0	0	0	0	0	0	0	0	0	0	0	0	0	0	0	0	0	0	0	0	0	0	0	0	0	0	0	0	0	0	0	0	0	0	0	0	0	0	0	0	0	0	0	0	0	0	0	0	0
4930592A05Rik	0.583333	0	0	0	1	1	1	0	0	0	3	0	0	0	0	1	1	0	1	1	1	0	1	1	0	0	1	1	0	0	0	1	0	0	2	0	1	0	1	0	0	0	0	3	2	1	0	1	1
4930592I03Rik	0.0416667	0	0	0	0	0	0	0	0	0	0	0	0	0	0	0	0	0	0	0	0	0	0	0	1	0	0	0	0	0	0	0	1	0	0	0	0	0	0	0	0	0	0	0	0	0	0	0	0
4930593A02Rik	0.4375	0	0	0	0	0	0	1	0	0	0	1	0	1	0	0	0	0	0	0	0	0	0	3	2	0	2	0	0	1	0	1	0	2	0	0	0	0	0	0	0	3	1	1	1	0	0	0	1
4930593C16Rik	0.0208333	0	0	0	0	0	0	0	0	0	0	0	0	0	0	0	0	0	0	0	0	0	0	0	0	0	0	1	0	0	0	0	0	0	0	0	0	0	0	0	0	0	0	0	0	0	0	0	0
4930594C11Rik	14.1875	3	15	10	27	16	27	5	21	10	11	9	13	16	25	20	4	9	3	6	12	21	14	14	10	22	14	10	19	19	14	21	10	18	14	16	5	10	12	19	16	17	6	18	21	23	5	13	7
4930594O21Rik	0	0	0	0	0	0	0	0	0	0	0	0	0	0	0	0	0	0	0	0	0	0	0	0	0	0	0	0	0	0	0	0	0	0	0	0	0	0	0	0	0	0	0	0	0	0	0	0	0
4930595D18Rik	0.166667	0	0	0	0	0	0	0	0	0	0	0	0	0	0	1	0	0	0	0	1	0	0	4	0	0	0	0	0	0	0	0	0	0	0	0	0	0	0	0	1	0	0	0	0	0	0	0	0
4930595M18Rik	0	0	0	0	0	0	0	0	0	0	0	0	0	0	0	0	0	0	0	0	0	0	0	0	0	0	0	0	0	0	0	0	0	0	0	0	0	0	0	0	0	0	0	0	0	0	0	0	0
4930596D02Rik	0	0	0	0	0	0	0	0	0	0	0	0	0	0	0	0	0	0	0	0	0	0	0	0	0	0	0	0	0	0	0	0	0	0	0	0	0	0	0	0	0	0	0	0	0	0	0	0	0
4930596I21Rik	0.875	0	0	0	0	1	1	0	3	0	0	3	4	1	1	2	0	0	0	0	0	1	3	1	1	3	1	0	1	0	3	0	2	0	1	0	0	1	6	1	0	0	1	0	0	0	0	0	0
4930597A21Rik	0.0416667	0	0	0	0	0	0	0	0	0	0	0	0	0	0	0	0	0	0	0	0	0	0	0	0	0	0	0	0	0	0	0	0	0	0	0	0	0	0	0	0	1	0	0	0	0	0	0	0
4930597G03Rik	0.0208333	0	0	0	0	0	0	1	0	0	0	0	0	0	0	0	0	0	0	0	0	0	0	0	0	0	0	0	0	0	0	0	0	0	0	0	0	0	0	0	0	0	0	0	0	0	0	0	0
4930598F16Rik	0.0416667	0	0	0	0	0	0	0	0	0	0	0	1	0	0	0	0	0	0	0	0	0	0	0	0	0	0	0	0	0	0	0	0	0	0	1	0	0	0	0	0	0	0	0	0	0	0	0	0
4930599N23Rik	7.97917	2	4	2	10	17	16	3	8	5	16	9	17	8	12	7	4	8	5	9	12	7	5	22	13	13	2	3	4	4	7	5	14	6	2	7	4	4	8	4	5	11	11	15	7	6	2	12	5
4931402G19Rik	3.625	0	0	1	5	5	7	2	0	2	6	0	5	1	8	2	2	5	1	1	1	0	4	8	5	0	1	0	4	2	4	7	5	4	6	2	5	5	1	9	5	6	3	15	4	7	3	1	2
4931403E22Rik	14.5833	2	16	16	13	11	6	3	25	17	17	3	6	15	33	19	10	7	2	5	18	38	33	16	5	13	30	27	20	6	11	9	17	13	38	14	5	3	7	14	22	13	11	25	15	24	9	9	6
4931403G20Rik	0.75	0	0	0	1	2	1	0	2	0	0	0	0	1	2	2	1	1	0	0	0	1	0	0	0	0	1	0	1	1	1	0	2	0	0	2	0	0	1	1	0	2	1	3	3	1	1	1	0
4931406B18Rik	0.0208333	0	0	0	0	0	0	0	0	0	0	0	0	0	0	0	0	0	0	0	0	0	0	1	0	0	0	0	0	0	0	0	0	0	0	0	0	0	0	0	0	0	0	0	0	0	0	0	0
4931406C07Rik	7886.19	1887	13736	9011	13497	7657	10562	3634	8744	4383	8282	5316	6444	6901	12163	8181	4236	7500	3620	4710	5115	8554	8902	11828	11223	1887	7195	9215	10980	8375	8038	8167	5277	7718	9117	8434	6180	7894	6295	6884	8144	8194	5339	14034	8943	11282	4950	10831	6197
4931406H21Rik	2.66667	0	6	2	2	0	6	0	5	0	5	4	6	0	7	3	1	7	1	6	2	2	2	9	4	5	1	2	0	1	3	3	0	1	0	2	2	0	2	7	0	1	1	2	3	4	2	4	1
4931406P16Rik	501.625	230	505	416	552	554	519	239	476	305	447	384	417	428	743	536	287	706	363	391	365	503	497	1102	871	671	238	321	342	453	538	679	438	545	283	594	408	446	433	499	508	799	499	1389	457	631	230	522	319
4931408C20Rik	0	0	0	0	0	0	0	0	0	0	0	0	0	0	0	0	0	0	0	0	0	0	0	0	0	0	0	0	0	0	0	0	0	0	0	0	0	0	0	0	0	0	0	0	0	0	0	0	0
4931408D14Rik	91.5	29	128	94	110	118	85	29	137	97	93	81	62	98	140	98	55	60	35	58	87	117	98	118	158	41	59	99	73	88	141	75	90	90	97	75	88	105	90	123	115	84	39	150	103	97	37	147	57
4931409K22Rik	0.270833	0	0	0	0	0	0	2	0	0	0	0	0	0	0	0	2	0	0	0	0	0	0	0	0	0	1	0	0	0	0	0	0	0	0	2	0	0	0	2	0	2	0	1	0	0	0	1	0
4931414P19Rik	105.375	53	118	100	116	176	160	53	141	62	77	153	104	90	120	82	53	109	54	72	82	89	102	199	200	90	59	88	102	108	145	125	106	106	98	96	70	126	58	98	68	128	77	250	108	130	75	124	54
4931417E11Rik	0	0	0	0	0	0	0	0	0	0	0	0	0	0	0	0	0	0	0	0	0	0	0	0	0	0	0	0	0	0	0	0	0	0	0	0	0	0	0	0	0	0	0	0	0	0	0	0	0
4931419H13Rik	0	0	0	0	0	0	0	0	0	0	0	0	0	0	0	0	0	0	0	0	0	0	0	0	0	0	0	0	0	0	0	0	0	0	0	0	0	0	0	0	0	0	0	0	0	0	0	0	0
4931420L22Rik	0.0208333	0	0	0	0	0	0	0	0	0	0	0	0	0	0	1	0	0	0	0	0	0	0	0	0	0	0	0	0	0	0	0	0	0	0	0	0	0	0	0	0	0	0	0	0	0	0	0	0
4931423N10Rik	0.4375	0	0	0	3	0	1	0	0	0	0	0	2	2	0	0	0	0	0	0	0	0	0	0	0	0	0	1	0	0	1	0	1	0	0	0	2	0	1	0	0	1	0	4	0	1	0	0	1
4931428F04Rik	30.6042	7	22	30	22	52	30	11	19	16	31	33	27	34	40	30	7	31	17	33	23	32	41	82	59	63	16	16	22	21	37	31	16	17	30	38	30	27	20	19	34	46	21	85	35	24	22	35	26
4931428L18Rik	0.0208333	0	0	0	0	0	0	0	0	0	0	0	0	0	0	0	0	0	0	0	0	0	0	0	0	0	0	0	0	0	0	0	0	1	0	0	0	0	0	0	0	0	0	0	0	0	0	0	0
4931429I11Rik	0	0	0	0	0	0	0	0	0	0	0	0	0	0	0	0	0	0	0	0	0	0	0	0	0	0	0	0	0	0	0	0	0	0	0	0	0	0	0	0	0	0	0	0	0	0	0	0	0
4931429L15Rik	1.35417	0	0	3	2	3	1	2	0	1	0	3	4	1	2	0	0	2	1	1	0	0	0	6	1	8	1	0	1	2	0	4	1	0	0	0	0	1	0	2	0	0	2	3	2	1	1	1	0
4931429P17Rik	0.0625	0	0	0	0	0	0	0	0	0	0	0	0	0	0	0	0	0	0	0	0	0	0	1	0	0	0	0	0	0	0	0	0	0	0	0	0	0	0	0	0	1	0	0	1	0	0	0	0
4931430N09Rik	0.604167	0	0	0	0	0	1	0	0	0	0	6	2	0	0	1	0	1	0	1	0	0	2	0	0	0	0	0	0	1	1	1	0	1	2	1	0	1	0	0	0	0	1	1	1	0	0	1	1
4931431B13Rik	0.0625	0	0	0	0	0	0	0	0	0	0	0	0	0	0	0	0	0	0	0	1	0	0	0	0	0	0	0	0	0	0	0	0	0	0	0	1	0	1	0	0	0	0	0	0	0	0	0	0
4931431C16Rik	37.2917	1	108	77	105	25	22	4	89	25	18	13	4	20	94	35	36	21	5	13	34	74	61	19	38	1	58	63	78	14	18	18	34	62	39	9	14	16	46	41	50	13	13	28	76	95	22	17	19
4931431F19Rik	0	0	0	0	0	0	0	0	0	0	0	0	0	0	0	0	0	0	0	0	0	0	0	0	0	0	0	0	0	0	0	0	0	0	0	0	0	0	0	0	0	0	0	0	0	0	0	0	0
4931440F15Rik	127.354	40	132	130	175	202	218	56	223	53	102	40	57	98	235	119	85	153	56	93	127	99	148	216	212	98	98	106	129	152	131	129	119	165	117	155	101	130	86	114	103	143	80	262	133	182	69	141	74
4931440J10Rik	0.375	0	0	1	0	0	1	0	0	0	0	4	0	0	0	0	0	0	0	0	1	0	1	0	0	4	1	0	0	0	0	0	0	1	0	0	0	0	0	1	0	0	0	0	0	2	0	1	0
4931440P22Rik	14.2083	4	14	26	20	15	13	6	25	10	38	22	23	16	20	14	5	8	4	12	22	13	8	4	29	11	8	16	14	12	7	12	7	17	14	13	8	11	12	7	8	21	5	24	13	17	9	34	10
4932411E22Rik	0.3125	0	0	0	0	0	0	0	0	0	0	0	0	0	0	0	0	0	0	0	0	0	0	0	0	10	0	0	0	0	0	0	1	0	0	0	0	0	1	1	0	1	0	1	0	0	0	0	0
4932411N23Rik	0.0416667	0	0	0	0	0	0	0	0	0	0	0	0	0	0	0	0	0	0	0	0	0	0	0	0	0	0	0	0	0	0	0	0	1	0	1	0	0	0	0	0	0	0	0	0	0	0	0	0
4932412D23Rik	0.479167	0	1	0	2	0	0	0	0	0	0	4	0	0	0	0	0	0	0	0	0	0	0	0	5	0	0	0	0	2	1	0	0	0	0	1	0	0	1	0	0	1	0	3	1	0	0	1	0
4932413F04Rik	0.0625	0	0	0	0	0	0	0	0	0	0	0	0	0	0	0	0	1	0	0	0	0	0	0	0	0	0	0	0	0	0	0	0	0	0	0	0	0	0	0	0	0	0	0	0	0	0	0	2
4932414J04Rik	0.0416667	0	0	0	0	0	0	0	0	0	0	0	0	0	0	0	0	0	0	0	0	0	1	0	0	0	0	0	0	0	0	0	0	0	0	0	0	0	1	0	0	0	0	0	0	0	0	0	0
4932414N04Rik	0.0625	0	0	1	0	0	0	0	0	0	0	0	0	0	0	0	0	0	0	0	0	0	0	0	0	0	0	0	0	1	0	0	0	0	0	0	0	0	0	0	0	0	0	0	1	0	0	0	0
4932415M13Rik	0	0	0	0	0	0	0	0	0	0	0	0	0	0	0	0	0	0	0	0	0	0	0	0	0	0	0	0	0	0	0	0	0	0	0	0	0	0	0	0	0	0	0	0	0	0	0	0	0
4932416H05Rik	52.6667	15	48	50	55	58	66	20	79	24	48	69	45	56	73	63	15	48	30	24	45	39	58	72	91	47	34	40	47	53	53	58	35	56	47	48	55	47	49	56	41	75	43	133	93	72	31	74	36
4932416K20Rik	0.0208333	0	0	0	0	1	0	0	0	0	0	0	0	0	0	0	0	0	0	0	0	0	0	0	0	0	0	0	0	0	0	0	0	0	0	0	0	0	0	0	0	0	0	0	0	0	0	0	0
4932418E24Rik	0.0208333	0	0	0	0	0	0	0	0	0	0	0	0	0	0	1	0	0	0	0	0	0	0	0	0	0	0	0	0	0	0	0	0	0	0	0	0	0	0	0	0	0	0	0	0	0	0	0	0
4932429P05Rik	0	0	0	0	0	0	0	0	0	0	0	0	0	0	0	0	0	0	0	0	0	0	0	0	0	0	0	0	0	0	0	0	0	0	0	0	0	0	0	0	0	0	0	0	0	0	0	0	0
4932435O22Rik	0.5625	0	1	0	0	0	0	2	0	0	0	0	1	0	0	0	0	0	0	1	0	2	0	0	3	0	2	0	0	0	0	0	0	0	0	2	0	1	0	0	0	1	0	6	1	0	1	2	1
4932438A13Rik	880.75	365	1197	793	1124	881	1014	365	920	492	879	547	592	628	1468	974	478	1040	507	657	678	979	914	1308	1087	702	619	849	921	984	924	962	966	1068	783	914	653	776	853	1036	1060	1247	725	2133	915	1145	477	1078	479
4932438H23Rik	1.5625	0	3	0	2	6	3	0	0	1	1	0	2	0	3	0	1	0	3	5	2	0	0	1	1	1	0	1	0	0	5	1	2	1	0	3	4	3	0	0	0	2	1	6	3	1	0	4	1
4932441J04Rik	0.208333	0	0	0	0	1	0	0	0	0	0	0	0	0	0	0	0	0	1	1	0	0	0	0	0	0	1	0	0	0	0	0	0	0	0	0	0	0	1	0	1	0	1	1	0	2	0	0	0
4932443I19Rik	0.0208333	0	0	0	0	0	0	0	0	0	0	0	0	0	0	0	0	0	0	0	0	0	0	0	0	0	0	0	0	0	0	0	0	0	0	0	0	0	0	0	0	0	0	1	0	0	0	0	0
4932702P03Rik	0.666667	0	0	0	0	0	0	0	3	1	1	0	2	0	0	2	1	0	0	0	0	0	0	2	1	0	1	2	0	1	0	1	0	0	0	1	2	0	0	0	3	2	0	1	0	2	0	1	1
4933400A11Rik	0.0208333	0	0	0	0	0	0	0	0	0	0	0	0	0	0	0	0	0	0	0	0	0	0	0	0	0	0	0	0	0	0	0	0	0	0	0	0	0	0	0	0	0	0	0	0	0	0	0	1
4933400B14Rik	0	0	0	0	0	0	0	0	0	0	0	0	0	0	0	0	0	0	0	0	0	0	0	0	0	0	0	0	0	0	0	0	0	0	0	0	0	0	0	0	0	0	0	0	0	0	0	0	0
4933400C23Rik	0	0	0	0	0	0	0	0	0	0	0	0	0	0	0	0	0	0	0	0	0	0	0	0	0	0	0	0	0	0	0	0	0	0	0	0	0	0	0	0	0	0	0	0	0	0	0	0	0
4933400F21Rik	0.416667	0	0	0	0	1	0	0	1	0	0	0	1	0	0	2	0	0	1	0	0	0	4	0	0	0	0	0	0	2	0	1	1	0	1	0	1	0	0	0	0	0	2	0	0	0	0	2	0
4933400L20Rik	0	0	0	0	0	0	0	0	0	0	0	0	0	0	0	0	0	0	0	0	0	0	0	0	0	0	0	0	0	0	0	0	0	0	0	0	0	0	0	0	0	0	0	0	0	0	0	0	0
4933401B06Rik	0.0208333	0	0	0	0	0	0	0	1	0	0	0	0	0	0	0	0	0	0	0	0	0	0	0	0	0	0	0	0	0	0	0	0	0	0	0	0	0	0	0	0	0	0	0	0	0	0	0	0
4933401D09Rik	1.83333	0	5	0	0	1	2	1	2	2	0	4	1	1	4	1	0	4	2	0	0	3	2	6	2	0	0	2	1	2	2	0	1	3	3	1	1	5	2	1	0	3	3	2	2	0	3	3	3
4933401H06Rik	0.395833	0	0	0	0	1	0	0	0	0	0	0	1	0	4	0	0	0	1	0	0	0	0	2	0	0	0	0	0	0	0	0	1	0	2	2	0	0	0	0	0	1	0	0	0	2	0	1	1
4933402C06Rik	0.25	0	3	0	0	1	0	0	1	0	0	0	1	0	0	1	0	0	0	0	0	0	0	0	0	0	0	0	0	0	0	1	0	0	0	0	1	0	0	1	1	0	0	0	0	0	0	1	0
4933402D24Rik	1.58333	0	0	2	3	4	1	0	0	1	2	0	3	0	3	2	1	5	2	0	1	0	2	1	3	0	0	3	2	0	5	3	4	0	3	0	1	1	2	0	1	8	2	0	0	3	0	1	1
4933402E13Rik	0.125	0	0	0	0	0	2	0	0	0	0	0	0	1	0	0	0	0	0	0	0	0	0	0	0	0	0	0	0	0	1	0	0	1	0	0	0	0	0	0	0	0	1	0	0	0	0	0	0
4933402J07Rik	0	0	0	0	0	0	0	0	0	0	0	0	0	0	0	0	0	0	0	0	0	0	0	0	0	0	0	0	0	0	0	0	0	0	0	0	0	0	0	0	0	0	0	0	0	0	0	0	0
4933402J10Rik	0	0	0	0	0	0	0	0	0	0	0	0	0	0	0	0	0	0	0	0	0	0	0	0	0	0	0	0	0	0	0	0	0	0	0	0	0	0	0	0	0	0	0	0	0	0	0	0	0
4933402J15Rik	0	0	0	0	0	0	0	0	0	0	0	0	0	0	0	0	0	0	0	0	0	0	0	0	0	0	0	0	0	0	0	0	0	0	0	0	0	0	0	0	0	0	0	0	0	0	0	0	0
4933402N03Rik	0	0	0	0	0	0	0	0	0	0	0	0	0	0	0	0	0	0	0	0	0	0	0	0	0	0	0	0	0	0	0	0	0	0	0	0	0	0	0	0	0	0	0	0	0	0	0	0	0
4933402N22Rik	0.270833	0	0	0	0	0	0	0	0	0	0	0	0	0	2	0	0	0	0	0	0	0	0	0	0	11	0	0	0	0	0	0	0	0	0	0	0	0	0	0	0	0	0	0	0	0	0	0	0
4933402P03Rik	0.145833	0	0	0	0	1	1	0	0	0	0	0	0	1	0	0	0	0	0	0	0	0	0	0	2	0	0	0	0	0	0	0	0	0	0	0	0	0	0	0	0	1	0	0	0	0	0	1	0
4933403O08Rik	0.0416667	0	0	0	0	0	0	0	0	0	0	0	0	0	0	0	0	0	0	0	0	0	0	0	0	0	0	0	0	0	0	0	0	0	0	1	1	0	0	0	0	0	0	0	0	0	0	0	0
4933404G15Rik	0	0	0	0	0	0	0	0	0	0	0	0	0	0	0	0	0	0	0	0	0	0	0	0	0	0	0	0	0	0	0	0	0	0	0	0	0	0	0	0	0	0	0	0	0	0	0	0	0
4933404K08Rik	0.0416667	0	0	0	0	0	0	0	0	0	0	0	0	0	0	0	0	0	0	0	0	0	0	0	0	0	0	0	0	0	0	0	0	0	0	1	0	0	0	0	0	1	0	0	0	0	0	0	0
4933404K13Rik	0.0416667	0	0	0	0	0	0	0	0	0	0	0	0	0	0	0	0	0	1	0	0	0	0	0	0	1	0	0	0	0	0	0	0	0	0	0	0	0	0	0	0	0	0	0	0	0	0	0	0
4933404O12Rik	68.3542	26	51	43	53	76	93	32	94	31	81	45	47	91	97	39	26	86	36	45	32	61	75	151	111	63	29	36	47	97	69	73	57	93	65	94	88	96	48	43	48	99	63	169	87	70	51	98	55
4933405D12Rik	1.5625	0	0	1	3	1	3	2	0	0	1	2	2	0	1	0	0	0	3	0	0	0	2	2	1	1	2	3	1	1	3	2	2	0	2	3	2	2	1	2	1	0	2	4	2	4	0	6	2
4933405E24Rik	0	0	0	0	0	0	0	0	0	0	0	0	0	0	0	0	0	0	0	0	0	0	0	0	0	0	0	0	0	0	0	0	0	0	0	0	0	0	0	0	0	0	0	0	0	0	0	0	0
4933405L10Rik	1.97917	0	0	3	0	4	5	0	0	0	0	3	5	2	8	2	0	3	1	2	1	2	2	3	3	0	0	0	2	2	2	3	1	1	1	0	2	0	1	2	2	8	2	4	4	1	3	1	4
4933405O20Rik	0	0	0	0	0	0	0	0	0	0	0	0	0	0	0	0	0	0	0	0	0	0	0	0	0	0	0	0	0	0	0	0	0	0	0	0	0	0	0	0	0	0	0	0	0	0	0	0	0
4933406C10Rik	11.6667	3	7	10	14	10	15	3	16	6	17	29	22	4	15	13	4	5	13	7	4	13	26	23	17	3	9	10	11	11	17	12	4	16	7	11	4	6	10	7	11	14	8	21	23	15	3	21	9
4933406D12Rik	0	0	0	0	0	0	0	0	0	0	0	0	0	0	0	0	0	0	0	0	0	0	0	0	0	0	0	0	0	0	0	0	0	0	0	0	0	0	0	0	0	0	0	0	0	0	0	0	0
4933406F09Rik	0	0	0	0	0	0	0	0	0	0	0	0	0	0	0	0	0	0	0	0	0	0	0	0	0	0	0	0	0	0	0	0	0	0	0	0	0	0	0	0	0	0	0	0	0	0	0	0	0
4933406G16Rik	0.0208333	0	0	0	0	0	0	0	0	0	0	0	0	0	0	0	0	0	0	0	0	0	0	0	0	0	0	0	0	0	0	0	0	0	0	0	0	0	0	0	1	0	0	0	0	0	0	0	0
4933406I18Rik	2.25	0	0	0	0	1	3	0	0	0	1	4	3	6	5	2	1	4	1	3	0	0	0	9	7	1	1	0	2	0	0	4	3	2	0	5	2	5	1	1	1	6	1	5	4	2	1	3	3
4933406J08Rik	0	0	0	0	0	0	0	0	0	0	0	0	0	0	0	0	0	0	0	0	0	0	0	0	0	0	0	0	0	0	0	0	0	0	0	0	0	0	0	0	0	0	0	0	0	0	0	0	0
4933406J10Rik	0.0625	0	0	0	0	2	0	0	0	0	0	0	0	0	0	0	0	0	0	0	0	0	0	0	0	0	0	0	0	0	0	0	0	0	0	0	0	0	0	0	0	0	1	0	0	0	0	0	0
4933406K04Rik	0	0	0	0	0	0	0	0	0	0	0	0	0	0	0	0	0	0	0	0	0	0	0	0	0	0	0	0	0	0	0	0	0	0	0	0	0	0	0	0	0	0	0	0	0	0	0	0	0
4933406M09Rik	0.0833333	0	0	0	0	0	0	0	0	0	0	0	0	0	0	0	0	0	0	0	0	0	0	0	0	3	0	0	0	0	1	0	0	0	0	0	0	0	0	0	0	0	0	0	0	0	0	0	0
4933407E24Rik	1.83333	0	0	0	0	0	0	0	4	1	4	12	3	1	2	0	3	7	0	0	1	0	0	11	5	8	1	2	1	0	2	3	0	2	0	1	2	1	0	0	0	0	0	3	0	0	1	4	1
4933407G14Rik	0.395833	0	0	2	0	1	0	1	0	0	0	0	0	0	1	0	0	0	0	0	0	0	0	2	2	0	0	1	0	1	0	1	0	0	0	0	1	0	0	1	1	0	1	0	0	0	0	0	1
4933407I05Rik	0	0	0	0	0	0	0	0	0	0	0	0	0	0	0	0	0	0	0	0	0	0	0	0	0	0	0	0	0	0	0	0	0	0	0	0	0	0	0	0	0	0	0	0	0	0	0	0	0
4933407K13Rik	97.75	31	58	82	86	142	131	52	84	64	131	149	123	79	183	76	62	151	70	82	90	110	74	207	191	87	63	61	57	80	132	124	79	91	79	69	52	74	85	86	97	115	85	282	90	138	31	84	34
4933407L21Rik	0.354167	0	0	0	0	0	0	0	0	1	0	2	0	0	1	0	0	0	0	0	0	0	1	0	0	0	0	0	0	0	0	0	5	1	0	0	0	0	0	0	2	1	1	1	0	0	0	1	0
4933408B17Rik	18.1458	3	20	21	15	21	26	10	34	8	23	31	24	13	9	8	4	16	3	14	23	22	16	30	29	17	15	18	11	16	22	24	16	13	6	9	16	19	22	13	12	30	12	58	23	17	11	22	18
4933408J17Rik	0.541667	0	0	0	0	0	0	0	0	1	1	0	2	2	0	0	1	1	0	0	1	0	0	2	2	3	0	0	0	0	0	0	0	0	0	1	0	0	1	2	0	2	1	2	0	0	0	1	0
4933408N05Rik	0.0208333	0	0	0	0	0	0	0	0	0	0	0	0	0	0	0	0	0	0	0	0	0	0	0	0	0	0	0	0	0	0	0	0	0	0	0	0	0	0	0	0	0	1	0	0	0	0	0	0
4933409G03Rik	0	0	0	0	0	0	0	0	0	0	0	0	0	0	0	0	0	0	0	0	0	0	0	0	0	0	0	0	0	0	0	0	0	0	0	0	0	0	0	0	0	0	0	0	0	0	0	0	0
4933409K07Rik	26.9375	0	0	6	29	39	21	16	80	8	39	34	38	44	32	23	6	32	35	26	26	15	34	40	27	74	6	10	4	26	18	43	30	22	12	28	18	24	23	26	20	18	18	90	29	30	10	27	26
4933411E08Rik	0.208333	0	0	0	0	0	1	0	0	0	0	0	0	0	1	0	0	0	0	0	0	0	0	0	0	0	0	0	0	0	0	1	0	0	2	0	0	0	0	0	1	1	0	1	0	0	1	0	0
4933411G06Rik	0	0	0	0	0	0	0	0	0	0	0	0	0	0	0	0	0	0	0	0	0	0	0	0	0	0	0	0	0	0	0	0	0	0	0	0	0	0	0	0	0	0	0	0	0	0	0	0	0
4933411K16Rik	17.4167	4	31	19	26	17	34	4	17	6	13	42	32	20	34	14	7	23	11	10	16	36	15	17	25	8	12	15	23	17	19	17	19	17	13	7	11	11	9	19	14	17	9	18	19	26	8	21	10
4933412E12Rik	103.542	33	112	67	106	101	115	33	107	54	129	235	143	123	143	73	50	87	55	60	63	106	122	230	205	126	60	101	87	106	99	106	79	100	70	101	78	107	71	63	80	110	57	233	141	101	75	158	72
4933412E24Rik	0	0	0	0	0	0	0	0	0	0	0	0	0	0	0	0	0	0	0	0	0	0	0	0	0	0	0	0	0	0	0	0	0	0	0	0	0	0	0	0	0	0	0	0	0	0	0	0	0
4933412O06Rik	0	0	0	0	0	0	0	0	0	0	0	0	0	0	0	0	0	0	0	0	0	0	0	0	0	0	0	0	0	0	0	0	0	0	0	0	0	0	0	0	0	0	0	0	0	0	0	0	0
4933413G19Rik	0.0625	0	0	0	0	0	0	0	0	0	0	0	0	0	0	0	0	0	0	0	0	0	0	0	0	0	0	0	0	0	1	0	0	0	0	0	0	0	0	1	0	0	0	0	0	0	0	0	1
4933413J09Rik	5.97917	0	1	7	10	11	1	4	5	2	9	13	7	6	10	7	3	9	1	8	3	2	10	8	7	6	2	6	11	3	10	7	2	2	7	0	2	5	4	5	11	10	6	15	6	5	0	9	8
4933413L06Rik	0.0208333	0	0	0	0	0	0	0	0	0	0	0	0	0	0	0	0	0	0	0	0	0	0	0	0	0	0	0	0	0	0	0	0	0	0	0	0	0	0	0	0	0	0	0	0	0	0	1	0
4933415F23Rik	0.520833	0	0	0	0	0	0	0	1	0	0	0	1	0	0	1	0	0	0	0	1	6	1	2	0	0	0	0	0	1	2	0	1	1	1	0	0	1	0	0	0	0	1	1	1	0	0	0	0
4933416C03Rik	0.0625	0	0	0	0	1	0	0	0	0	0	0	0	0	0	0	0	0	0	0	0	0	0	0	0	0	0	0	0	0	0	0	0	0	0	0	0	0	1	0	0	0	0	1	0	0	0	0	0
4933416E03Rik	0.0416667	0	0	0	0	0	0	0	0	0	0	0	0	0	0	0	0	0	0	0	0	0	0	0	0	0	0	0	0	0	0	0	0	0	0	0	0	2	0	0	0	0	0	0	0	0	0	0	0
4933416I08Rik	0.125	0	0	1	1	0	0	0	0	0	0	0	0	0	0	0	0	0	0	0	0	0	0	0	0	0	1	0	0	0	0	0	2	0	0	0	0	0	0	0	0	0	0	0	0	1	0	0	0
4933416M06Rik	2.04167	0	5	0	1	1	0	0	2	3	6	0	0	3	0	5	0	3	2	4	0	4	2	4	2	0	0	0	1	5	0	3	4	3	2	0	3	2	4	0	1	3	2	7	3	3	1	4	0
4933416M07Rik	1	0	0	0	2	1	4	1	4	0	2	0	0	2	0	0	0	1	0	1	0	0	0	1	1	3	1	3	1	1	1	1	0	0	0	0	1	0	0	2	2	0	1	2	0	4	0	3	1
4933417A18Rik	25.9583	1	64	13	29	37	35	18	31	19	31	17	25	20	49	22	11	21	8	13	17	25	35	43	34	1	25	18	23	23	37	23	17	28	21	20	21	32	23	15	17	31	15	64	39	40	23	36	17
4933417D19Rik	7.77083	2	7	3	6	8	8	8	17	2	7	13	3	7	9	8	3	5	3	5	6	5	5	6	16	13	4	11	4	14	6	7	5	10	11	7	5	5	9	5	3	11	8	25	2	15	8	11	7
4933417E11Rik	0.0625	0	0	0	0	0	0	0	0	0	0	0	0	0	0	0	0	0	0	0	0	0	0	0	0	2	0	0	0	0	0	1	0	0	0	0	0	0	0	0	0	0	0	0	0	0	0	0	0
4933417G07Rik	26.7708	8	52	35	30	42	52	8	35	18	23	21	15	35	31	30	10	19	14	13	16	36	19	38	24	18	15	16	27	30	29	25	26	22	24	22	10	34	23	32	19	29	20	79	29	34	21	44	27
4933417O13Rik	1.4375	0	1	3	0	1	4	0	2	0	3	0	2	2	3	3	1	1	0	0	1	2	0	5	4	0	0	0	0	4	1	2	1	1	2	0	2	4	1	0	2	1	1	5	1	2	0	0	0
4933421I07Rik	0.0625	0	0	0	0	0	0	0	0	0	0	0	0	0	0	0	0	0	0	0	0	0	0	1	0	0	0	0	0	0	0	0	0	0	0	0	0	0	0	0	0	0	0	0	0	0	0	2	0
4933421O10Rik	82.1458	28	63	73	93	103	97	28	107	43	90	95	78	69	134	59	61	82	55	67	78	81	109	129	114	82	60	69	65	79	65	87	67	92	75	73	74	83	63	65	96	97	67	177	98	96	71	108	65
4933422A05Rik	0.583333	0	0	0	2	0	0	0	5	0	3	4	0	0	0	0	0	1	0	0	0	0	0	2	0	1	0	0	0	0	2	1	0	0	1	1	0	1	1	1	0	0	0	1	0	1	0	0	0
4933424G05Rik	6.1875	0	15	7	11	3	9	0	4	1	10	5	11	2	8	7	3	6	6	5	4	4	6	10	10	2	4	2	5	7	8	5	4	6	4	4	8	3	6	3	2	17	7	19	11	6	5	7	2
4933424G06Rik	0.375	0	0	0	0	0	0	0	0	0	0	0	0	0	0	0	0	0	0	1	0	1	0	0	2	0	0	0	0	1	0	0	2	0	0	1	0	1	0	0	0	0	2	3	1	2	0	0	0
4933425B07Rik	0	0	0	0	0	0	0	0	0	0	0	0	0	0	0	0	0	0	0	0	0	0	0	0	0	0	0	0	0	0	0	0	0	0	0	0	0	0	0	0	0	0	0	0	0	0	0	0	0
4933425L06Rik	0.0208333	0	0	0	0	0	0	0	0	0	0	0	0	0	0	0	0	0	0	0	0	0	0	0	0	0	0	0	0	0	0	0	0	0	0	0	0	1	0	0	0	0	0	0	0	0	0	0	0
4933427D06Rik	0.0416667	0	0	0	0	0	0	1	0	0	0	0	0	0	0	0	0	0	0	0	0	0	0	0	0	0	0	0	0	0	0	1	0	0	0	0	0	0	0	0	0	0	0	0	0	0	0	0	0
4933427D14Rik	158.417	68	159	151	193	204	172	68	194	82	188	244	167	142	221	153	84	181	78	92	109	152	199	267	221	199	102	124	121	154	185	156	166	166	128	155	107	149	135	129	159	196	118	379	178	154	117	225	100
4933427E11Rik	8	0	1	8	2	12	2	2	7	5	10	3	21	6	13	4	2	15	8	3	6	9	2	13	19	4	1	1	5	10	14	9	6	3	1	10	11	11	2	13	0	13	4	46	7	8	5	17	5
4933427E13Rik	0	0	0	0	0	0	0	0	0	0	0	0	0	0	0	0	0	0	0	0	0	0	0	0	0	0	0	0	0	0	0	0	0	0	0	0	0	0	0	0	0	0	0	0	0	0	0	0	0
4933427G17Rik	11.8333	2	18	21	11	17	9	2	17	7	25	15	10	9	38	9	6	20	8	11	8	8	20	5	18	9	7	12	6	12	11	11	7	9	6	13	12	4	7	8	7	11	8	18	17	11	12	17	15
4933427I22Rik	0.0208333	0	0	0	0	0	0	0	0	0	0	0	0	0	0	0	0	0	0	0	0	0	0	0	0	0	0	1	0	0	0	0	0	0	0	0	0	0	0	0	0	0	0	0	0	0	0	0	0
4933428C19Rik	0.0416667	0	0	0	0	1	0	0	0	0	0	0	0	0	0	0	0	0	0	0	0	0	0	0	0	0	0	0	0	0	0	0	0	0	0	0	0	0	0	0	0	0	0	0	0	0	0	0	0
4933428G20Rik	1.97917	0	1	3	1	2	0	2	1	0	3	7	3	2	2	0	0	2	1	2	1	0	3	4	0	4	2	4	3	2	0	2	3	3	3	0	2	2	0	0	2	1	2	0	7	2	1	5	3
4933429K18Rik	0.0416667	0	0	0	0	0	0	0	0	0	0	0	0	0	0	0	0	0	0	0	0	0	0	0	2	0	0	0	0	0	0	0	0	0	0	0	0	0	0	0	0	0	0	0	0	0	0	0	0
4933429O19Rik	1.10417	0	2	0	3	1	1	2	1	3	3	0	0	1	2	1	2	0	0	0	0	2	2	1	1	1	2	1	2	0	0	0	4	0	3	0	0	1	0	1	0	1	1	2	0	5	0	0	0
4933430H16Rik	0.125	0	0	0	0	0	0	0	0	1	0	0	0	0	0	0	0	0	0	0	0	1	0	0	0	0	0	0	0	0	0	0	0	1	0	0	0	0	2	0	0	0	0	0	0	1	0	0	0
4933430I17Rik	2.64583	0	0	0	1	3	0	4	3	0	2	4	2	4	13	0	1	0	0	4	2	6	0	3	4	4	2	0	3	0	0	2	5	2	5	4	0	1	6	4	4	5	2	10	1	1	2	5	2
4933430M04Rik	0	0	0	0	0	0	0	0	0	0	0	0	0	0	0	0	0	0	0	0	0	0	0	0	0	0	0	0	0	0	0	0	0	0	0	0	0	0	0	0	0	0	0	0	0	0	0	0	0
4933430N04Rik	0	0	0	0	0	0	0	0	0	0	0	0	0	0	0	0	0	0	0	0	0	0	0	0	0	0	0	0	0	0	0	0	0	0	0	0	0	0	0	0	0	0	0	0	0	0	0	0	0
4933431E20Rik	313.938	119	388	297	378	311	384	119	446	209	386	327	276	309	509	271	157	265	122	179	222	343	316	462	509	183	221	305	311	308	325	322	295	413	304	306	264	289	275	335	307	364	232	672	423	394	208	422	200
4933431G14Rik	0.520833	0	0	1	0	1	0	0	0	0	2	1	1	1	5	0	0	0	2	0	0	0	0	0	0	3	0	0	1	0	0	0	2	0	0	0	1	0	1	0	0	0	1	2	0	0	0	0	0
4933432G23Rik	0.0208333	0	0	0	0	0	0	0	0	0	0	0	0	0	0	0	0	0	0	0	0	0	0	0	0	1	0	0	0	0	0	0	0	0	0	0	0	0	0	0	0	0	0	0	0	0	0	0	0
4933432I03Rik	0.291667	0	0	0	0	0	0	0	0	0	0	0	0	0	0	0	0	0	0	0	0	1	0	1	0	0	0	0	0	0	0	0	1	0	0	2	0	2	0	0	0	1	0	1	0	1	0	4	0
4933432I09Rik	0.395833	0	0	0	0	0	0	0	0	0	0	1	2	0	0	0	0	0	0	0	0	0	0	2	1	0	0	0	0	0	1	1	0	1	0	0	0	0	0	0	1	1	0	0	3	2	2	1	0
4933432K03Rik	0.145833	0	0	0	0	0	0	0	3	0	0	0	2	0	0	0	0	0	0	0	0	0	0	0	0	0	0	0	0	0	0	0	0	0	0	0	0	0	0	0	0	0	0	0	2	0	0	0	0
4933433C11Rik	4.58333	0	6	13	8	0	9	1	7	3	4	1	4	3	8	9	5	2	0	3	0	6	9	10	8	0	7	12	9	4	2	3	7	1	3	1	1	4	3	4	8	5	2	5	4	6	3	4	3
4933433F19Rik	0	0	0	0	0	0	0	0	0	0	0	0	0	0	0	0	0	0	0	0	0	0	0	0	0	0	0	0	0	0	0	0	0	0	0	0	0	0	0	0	0	0	0	0	0	0	0	0	0
4933433G08Rik	0	0	0	0	0	0	0	0	0	0	0	0	0	0	0	0	0	0	0	0	0	0	0	0	0	0	0	0	0	0	0	0	0	0	0	0	0	0	0	0	0	0	0	0	0	0	0	0	0
4933433G15Rik	1.41667	0	1	0	0	4	2	0	1	1	2	0	3	0	2	4	1	5	2	0	0	0	0	4	3	1	5	2	0	0	4	3	0	1	1	1	0	1	1	0	0	2	1	4	0	2	1	2	1
4933433G19Rik	2.33333	0	0	5	5	1	7	2	3	0	0	0	2	4	3	3	1	3	3	3	0	10	0	5	4	3	2	1	2	1	1	1	2	0	2	3	0	2	0	2	5	3	2	6	2	2	1	1	2
4933433H22Rik	0.208333	0	0	0	0	0	0	0	0	2	0	1	1	0	0	0	0	0	1	0	0	0	0	0	0	0	0	0	0	0	0	0	0	0	0	1	0	0	0	0	0	2	1	0	1	0	0	0	0
4933434E20Rik	698.062	317	913	605	935	770	1029	317	805	465	666	433	472	640	1053	688	352	627	343	415	517	782	916	1044	1022	623	536	729	777	805	728	771	703	733	677	675	628	618	568	666	691	779	517	1464	864	968	492	861	424
4933436E23Rik	0.229167	0	0	0	0	0	0	0	0	0	0	0	0	1	0	0	0	0	0	0	0	0	0	1	0	0	0	0	1	3	0	0	0	0	0	0	0	1	0	0	0	0	0	0	1	0	0	0	3
4933436H12Rik	0.0208333	0	0	0	0	0	0	0	0	0	0	0	0	0	0	0	0	0	0	1	0	0	0	0	0	0	0	0	0	0	0	0	0	0	0	0	0	0	0	0	0	0	0	0	0	0	0	0	0
4933436I01Rik	0.0208333	0	0	0	0	0	0	0	0	0	0	0	0	0	0	0	0	0	0	0	0	0	0	0	0	0	0	0	0	0	0	0	0	0	0	0	0	0	0	0	0	0	0	1	0	0	0	0	0
4933438B17Rik	0	0	0	0	0	0	0	0	0	0	0	0	0	0	0	0	0	0	0	0	0	0	0	0	0	0	0	0	0	0	0	0	0	0	0	0	0	0	0	0	0	0	0	0	0	0	0	0	0
4933438K21Rik	0.291667	0	2	1	0	0	0	0	0	0	1	0	0	0	2	0	1	0	0	0	0	1	3	0	0	0	0	0	0	0	0	1	1	0	0	0	0	0	0	1	0	0	0	0	0	0	0	0	0
4933439C10Rik	221.542	63	216	181	219	266	268	73	284	88	362	587	436	236	266	158	63	182	84	119	177	180	254	344	371	239	136	187	181	223	215	189	182	202	152	191	183	189	141	145	182	241	124	515	242	260	127	426	184
4933439K11Rik	1.8125	0	0	0	0	4	1	3	2	2	3	2	0	5	5	0	2	3	2	0	3	3	3	0	0	8	0	2	2	1	2	1	2	0	0	1	2	2	2	1	1	3	1	7	2	0	1	2	1
4933440J02Rik	0.0625	0	0	0	1	0	0	0	0	0	0	0	0	0	0	0	0	0	0	0	0	0	0	2	0	0	0	0	0	0	0	0	0	0	0	0	0	0	0	0	0	0	0	0	0	0	0	0	0
4933440M02Rik	0	0	0	0	0	0	0	0	0	0	0	0	0	0	0	0	0	0	0	0	0	0	0	0	0	0	0	0	0	0	0	0	0	0	0	0	0	0	0	0	0	0	0	0	0	0	0	0	0
5031410I06Rik	10.5417	0	1	1	0	0	3	0	15	8	19	24	35	29	4	0	3	10	2	3	6	11	9	19	35	0	0	0	0	0	0	0	9	5	9	43	23	29	0	6	1	20	3	25	11	15	8	31	20
5031414D18Rik	12.5417	1	9	1	6	10	2	2	4	8	18	20	27	15	16	9	2	2	12	1	7	12	6	29	19	129	3	5	4	8	10	15	45	7	3	13	6	7	5	13	10	13	7	22	15	5	4	11	3
5031425E22Rik	259	101	216	261	315	363	371	103	335	101	340	292	327	232	285	224	126	236	134	174	236	222	266	439	380	219	159	212	221	303	318	285	212	193	227	301	218	195	208	218	218	327	214	659	329	296	143	426	208
5031425F14Rik	1.375	0	0	9	0	0	0	0	3	0	0	0	0	0	4	0	0	0	11	0	0	10	0	0	0	2	0	0	0	0	0	0	3	0	0	2	0	0	0	2	0	13	1	1	4	0	0	1	0
5031426D15Rik	5.47917	0	2	3	1	8	6	6	7	6	12	21	10	4	2	2	1	10	4	3	2	3	1	11	14	25	0	3	3	6	4	5	4	4	2	3	4	2	0	13	0	2	1	14	5	8	2	5	3
5031434C07Rik	0.291667	0	0	1	0	0	0	0	0	0	0	0	3	0	0	0	0	0	0	0	0	0	0	3	1	0	0	0	0	0	0	0	2	0	0	0	0	0	0	0	0	0	2	0	0	0	0	1	1
5031434O11Rik	9.66667	0	8	5	9	13	17	0	7	2	21	25	24	8	15	4	1	9	6	5	3	3	12	21	10	9	3	11	2	8	12	6	7	12	5	15	9	12	3	9	5	16	11	24	7	14	3	24	7
5031439G07Rik	574.938	233	652	709	808	853	687	279	805	288	462	261	331	481	965	703	305	632	233	366	479	574	628	883	838	868	425	499	536	608	706	599	556	727	544	601	399	539	539	610	542	658	395	1175	627	777	291	578	278
5033403F01Rik	4.9375	0	16	1	8	7	4	0	3	1	2	9	2	1	7	8	5	8	2	5	5	1	1	8	2	3	8	10	1	3	6	8	8	0	3	6	1	4	1	1	1	12	6	7	9	10	4	14	2
5033403H07Rik	1.27083	0	1	0	0	1	0	0	2	1	1	0	2	5	5	2	2	2	0	1	0	0	0	2	2	0	0	1	0	0	1	1	3	1	2	1	3	0	1	1	0	2	1	3	2	5	0	4	0
5033404E19Rik	0	0	0	0	0	0	0	0	0	0	0	0	0	0	0	0	0	0	0	0	0	0	0	0	0	0	0	0	0	0	0	0	0	0	0	0	0	0	0	0	0	0	0	0	0	0	0	0	0
5033406O09Rik	4.33333	0	7	5	15	6	1	0	4	1	8	10	3	5	11	3	0	1	3	4	4	10	7	2	8	9	2	7	1	2	1	2	1	3	3	6	4	3	2	4	2	4	2	2	4	7	1	9	6
5033428I22Rik	0	0	0	0	0	0	0	0	0	0	0	0	0	0	0	0	0	0	0	0	0	0	0	0	0	0	0	0	0	0	0	0	0	0	0	0	0	0	0	0	0	0	0	0	0	0	0	0	0
5330411J11Rik	0	0	0	0	0	0	0	0	0	0	0	0	0	0	0	0	0	0	0	0	0	0	0	0	0	0	0	0	0	0	0	0	0	0	0	0	0	0	0	0	0	0	0	0	0	0	0	0	0
5330413P13Rik	0.0833333	0	0	0	0	0	0	0	0	0	0	0	0	0	0	0	0	0	0	0	0	0	0	0	0	0	0	0	0	1	1	0	0	0	0	0	0	1	0	0	0	0	1	0	0	0	0	0	0
5330417C22Rik	15.0208	0	5	4	8	6	4	4	13	9	31	0	11	23	14	9	4	17	6	9	5	12	6	38	50	11	1	6	5	9	9	8	18	21	11	43	29	39	10	8	8	33	16	57	7	12	13	30	13
5330426P16Rik	19.2708	4	7	14	13	20	29	6	23	4	21	24	20	23	38	20	12	34	17	7	18	15	21	31	24	33	19	8	16	26	27	24	21	9	9	19	12	9	19	21	16	32	27	49	15	15	10	28	10
5330434G04Rik	0.0625	0	0	0	0	0	0	0	0	0	0	0	0	0	0	0	1	1	0	0	0	0	0	1	0	0	0	0	0	0	0	0	0	0	0	0	0	0	0	0	0	0	0	0	0	0	0	0	0
5330439B14Rik	0.0208333	0	0	0	0	0	0	0	0	0	0	0	0	0	0	1	0	0	0	0	0	0	0	0	0	0	0	0	0	0	0	0	0	0	0	0	0	0	0	0	0	0	0	0	0	0	0	0	0
5430401F13Rik	0	0	0	0	0	0	0	0	0	0	0	0	0	0	0	0	0	0	0	0	0	0	0	0	0	0	0	0	0	0	0	0	0	0	0	0	0	0	0	0	0	0	0	0	0	0	0	0	0
5430402E10Rik	0	0	0	0	0	0	0	0	0	0	0	0	0	0	0	0	0	0	0	0	0	0	0	0	0	0	0	0	0	0	0	0	0	0	0	0	0	0	0	0	0	0	0	0	0	0	0	0	0
5430402O13Rik	10.2083	0	7	6	6	9	17	5	8	2	9	20	12	13	18	8	6	11	6	4	11	0	9	28	17	2	8	5	15	10	22	11	6	10	10	14	10	17	6	5	10	16	5	26	18	10	4	12	4
5430403N17Rik	0	0	0	0	0	0	0	0	0	0	0	0	0	0	0	0	0	0	0	0	0	0	0	0	0	0	0	0	0	0	0	0	0	0	0	0	0	0	0	0	0	0	0	0	0	0	0	0	0
5430405H02Rik	14.5625	1	39	15	18	15	28	12	19	1	27	11	9	7	9	14	11	9	8	9	14	12	10	16	35	9	10	15	4	15	16	12	7	14	16	12	14	16	4	12	15	18	9	43	17	19	13	25	11
5430416N02Rik	22.75	7	23	12	21	24	45	10	24	7	15	52	44	16	17	19	15	15	16	11	17	13	23	33	35	40	14	20	16	21	23	22	17	24	18	17	19	20	17	20	20	25	13	68	36	30	14	25	19
5430416O09Rik	28.5625	5	21	18	22	42	32	12	46	11	23	52	48	30	29	33	15	45	15	25	19	15	33	49	81	19	13	11	10	30	39	45	13	23	5	35	23	19	16	21	19	36	25	83	26	37	13	41	27
5430419D17Rik	0.0208333	0	0	0	0	0	0	0	0	0	0	0	0	0	0	0	0	1	0	0	0	0	0	0	0	0	0	0	0	0	0	0	0	0	0	0	0	0	0	0	0	0	0	0	0	0	0	0	0
5430421F17Rik	0.9375	0	0	1	0	1	0	0	3	0	0	0	4	1	0	1	3	0	1	2	0	0	0	0	0	2	5	4	2	1	1	0	0	1	1	0	0	0	1	0	0	2	0	0	3	2	0	3	0
5430421N21Rik	0.208333	0	0	1	0	0	0	0	0	0	0	3	2	0	0	0	1	0	0	0	0	0	0	0	0	1	0	0	0	0	0	0	0	0	0	0	0	0	1	0	0	0	0	1	0	0	0	0	0
5430425K12Rik	0.395833	0	2	0	1	0	0	0	0	0	0	0	0	1	0	0	0	0	0	2	1	0	0	4	0	0	1	0	0	0	0	0	0	0	0	0	0	0	0	1	0	0	3	0	0	0	0	1	0
5430427M07Rik	0.0625	0	0	0	0	0	0	0	0	0	0	0	0	0	0	0	0	0	0	0	0	0	1	0	0	0	0	0	0	0	0	0	0	0	0	0	0	0	0	0	0	0	0	1	0	0	0	0	0
5430427O19Rik	6.02083	0	5	1	1	2	10	3	0	6	1	5	12	3	1	6	1	4	3	0	3	2	4	17	6	63	5	5	4	5	2	2	23	4	6	4	6	9	3	0	4	4	4	8	11	6	1	9	2
5430428K19Rik	0.1875	0	2	0	0	0	0	0	0	0	0	0	0	1	0	0	0	2	0	0	0	0	0	0	0	0	0	0	0	0	0	0	0	0	0	0	0	1	0	0	1	2	0	0	0	0	0	0	0
5430431A17Rik	2.04167	0	0	3	1	5	1	0	2	2	2	12	1	3	3	1	0	0	0	0	5	0	4	2	3	13	0	3	0	2	1	2	4	0	1	1	2	0	4	1	0	0	1	9	1	1	0	1	1
5430434I15Rik	0	0	0	0	0	0	0	0	0	0	0	0	0	0	0	0	0	0	0	0	0	0	0	0	0	0	0	0	0	0	0	0	0	0	0	0	0	0	0	0	0	0	0	0	0	0	0	0	0
5430437J10Rik	3.41667	0	0	0	0	0	1	0	2	0	0	17	7	4	3	0	0	0	2	3	2	2	7	2	7	44	0	0	0	5	0	0	4	1	2	2	3	5	1	4	1	3	2	3	3	5	1	3	5
5430440P10Rik	1.10417	0	2	0	1	1	0	2	0	0	0	3	3	0	0	1	0	0	0	0	1	0	1	2	3	2	0	0	1	2	1	5	1	2	0	2	0	3	0	1	0	2	0	3	0	1	0	6	1
5530400C23Rik	0	0	0	0	0	0	0	0	0	0	0	0	0	0	0	0	0	0	0	0	0	0	0	0	0	0	0	0	0	0	0	0	0	0	0	0	0	0	0	0	0	0	0	0	0	0	0	0	0
5530401A14Rik	0	0	0	0	0	0	0	0	0	0	0	0	0	0	0	0	0	0	0	0	0	0	0	0	0	0	0	0	0	0	0	0	0	0	0	0	0	0	0	0	0	0	0	0	0	0	0	0	0
5530601H04Rik	56.9583	18	65	38	50	42	67	18	44	43	59	61	65	70	74	48	29	100	33	64	34	55	41	90	101	76	29	31	31	74	76	61	50	45	35	58	50	50	43	58	52	96	60	183	60	60	28	73	38
5730403I07Rik	12.1875	2	21	6	15	14	7	2	15	10	10	11	14	4	17	16	6	7	5	9	9	15	8	19	21	4	10	15	6	17	13	14	6	9	11	11	11	14	8	7	8	27	11	34	19	14	11	31	5
5730405O15Rik	9.58333	0	5	5	6	16	9	0	4	3	15	35	14	16	6	3	5	12	3	4	6	15	8	29	17	6	10	5	11	6	8	10	6	7	9	9	12	11	3	8	11	9	6	18	11	8	11	14	5
5730408K05Rik	5.625	0	9	3	4	3	5	0	11	2	5	6	10	3	13	3	1	6	2	2	2	0	4	12	11	29	2	3	2	2	3	4	3	5	10	6	1	5	2	3	7	9	6	9	6	12	4	11	2
5730409E04Rik	101.771	33	72	48	65	122	154	46	104	38	135	158	161	114	101	85	38	109	65	77	79	79	85	261	186	181	33	58	59	110	105	91	78	71	41	127	106	150	67	75	75	124	90	275	96	94	46	193	90
5730412P04Rik	0	0	0	0	0	0	0	0	0	0	0	0	0	0	0	0	0	0	0	0	0	0	0	0	0	0	0	0	0	0	0	0	0	0	0	0	0	0	0	0	0	0	0	0	0	0	0	0	0
5730416F02Rik	11.75	0	3	3	2	28	30	3	2	0	7	9	37	16	2	2	5	18	6	9	6	2	1	39	17	44	3	2	2	19	16	15	6	0	7	26	9	20	1	4	4	21	6	47	8	11	3	17	21
5730420D15Rik	10.0833	0	1	5	1	39	59	12	0	1	14	7	12	15	0	0	3	22	16	15	3	0	0	25	2	4	0	0	0	14	9	23	1	1	0	39	4	24	1	3	0	19	18	23	2	4	0	20	16
5730422E09Rik	1.29167	0	0	2	1	2	5	0	0	0	9	0	1	1	1	2	1	1	1	1	0	4	0	0	3	0	0	0	4	3	1	2	2	3	0	1	2	0	0	0	0	2	0	3	1	1	0	1	0
5730435O14Rik	2.375	0	1	1	4	2	6	1	0	0	6	5	13	1	0	2	0	1	0	3	1	0	0	5	2	1	2	6	3	1	1	0	3	1	2	3	0	2	1	1	1	5	0	10	6	3	2	6	0
5730455P16Rik	370.688	151	471	301	393	374	464	151	467	220	403	248	261	275	587	400	170	443	206	274	273	477	386	645	507	230	254	291	366	327	426	416	305	425	346	426	336	357	344	418	417	496	325	809	461	467	252	471	228
5730457N03Rik	0.0208333	0	1	0	0	0	0	0	0	0	0	0	0	0	0	0	0	0	0	0	0	0	0	0	0	0	0	0	0	0	0	0	0	0	0	0	0	0	0	0	0	0	0	0	0	0	0	0	0
5730460C07Rik	0.666667	0	0	0	0	2	0	0	2	2	0	0	0	4	0	0	0	0	0	0	1	2	0	2	2	0	0	0	1	0	0	0	1	0	0	2	0	0	0	0	0	1	1	4	1	0	0	1	0
5730480H06Rik	23.9375	9	30	15	12	33	31	9	30	9	13	43	41	28	37	17	12	22	23	14	15	13	29	33	37	37	10	16	25	22	18	37	14	28	22	16	24	19	24	16	22	22	25	42	37	31	16	40	22
5730488B01Rik	0.145833	0	0	0	0	0	0	0	0	0	0	0	0	0	0	0	0	0	0	0	0	0	0	0	0	4	0	0	0	0	0	0	2	0	0	1	0	0	0	0	0	0	0	0	0	0	0	0	0
5730507C01Rik	16.25	5	20	13	13	14	12	7	18	9	27	9	7	13	34	21	10	9	7	5	19	35	34	25	25	10	5	13	10	10	14	11	14	19	37	18	8	9	15	20	24	16	10	20	29	33	8	21	10
5730508B09Rik	117.083	25	129	80	113	176	146	52	110	25	138	161	103	80	187	86	63	114	74	83	139	99	118	156	163	164	62	78	78	130	119	119	154	76	82	131	75	88	84	130	125	195	124	353	147	187	56	127	81
5730522E02Rik	1.125	0	0	2	4	1	3	0	1	0	0	1	0	0	3	2	1	0	0	2	1	1	3	0	0	0	6	3	1	1	2	2	1	1	1	1	1	0	2	0	1	0	0	0	1	2	1	1	0
5730559C18Rik	210.688	83	292	262	378	382	388	88	296	83	204	145	135	170	332	183	92	181	104	118	184	181	220	245	147	424	154	180	209	306	243	209	227	253	242	240	159	143	142	153	148	138	97	307	209	196	185	368	202
5830411N06Rik	8.16667	0	9	19	7	1	0	0	8	16	2	3	0	10	29	11	6	1	0	1	15	20	29	4	1	9	11	18	15	0	0	0	11	10	40	3	2	1	10	9	5	3	1	1	13	29	4	2	0
5830415F09Rik	46.0417	17	48	50	44	48	65	20	50	21	59	31	62	47	58	51	17	38	26	19	42	29	59	72	95	76	38	34	49	65	68	36	41	48	36	44	38	44	39	23	38	37	44	100	55	55	27	70	32
5830416I19Rik	1.375	0	1	0	3	0	4	0	1	0	3	1	0	0	2	3	0	2	1	1	1	1	2	4	0	2	1	2	3	2	3	1	3	1	1	2	1	1	0	0	1	0	2	1	2	1	0	4	0
5830416P10Rik	4.22917	0	4	2	14	1	1	2	3	4	0	2	1	6	2	3	1	1	0	0	2	3	3	14	7	26	1	5	9	2	3	2	9	6	3	6	2	6	4	3	5	2	4	4	5	7	4	4	5
5830417I10Rik	832.688	343	765	743	939	1051	949	428	957	432	882	743	634	676	1409	1009	498	1153	516	736	575	855	915	1665	1317	825	467	629	606	719	899	947	933	1057	575	996	479	620	707	880	834	1255	743	2160	811	864	447	852	474
5830418P13Rik	0.4375	0	0	0	0	0	0	0	1	1	0	0	0	0	1	0	0	0	0	0	0	0	1	3	0	0	0	0	0	0	0	0	1	2	0	1	3	1	0	1	0	0	1	1	0	0	0	0	1
5830428M24Rik	1.9375	0	4	1	0	2	1	0	1	2	0	0	1	1	0	0	0	2	3	1	1	8	5	7	0	15	0	1	0	0	1	3	5	0	3	1	1	1	1	0	0	5	1	1	1	4	0	6	1
5830432E09Rik	1.625	0	1	0	2	0	1	0	0	0	3	0	4	1	1	1	0	3	0	0	1	1	3	3	2	25	0	0	0	0	2	1	3	1	0	5	1	0	2	2	0	0	0	2	1	1	0	4	1
5830444B04Rik	16.8333	2	18	14	5	13	25	5	19	16	25	38	21	21	42	27	8	15	8	8	5	13	24	24	42	19	7	8	13	14	17	3	11	13	10	26	11	15	13	8	7	31	13	35	14	18	9	33	2
5830454E08Rik	20.4583	5	23	23	10	25	24	8	37	5	21	38	28	17	30	17	10	15	13	9	13	30	21	37	35	12	12	20	12	26	26	12	15	9	19	22	20	16	10	17	12	30	16	61	30	29	12	20	24
5830473C10Rik	31.8333	3	11	17	23	56	61	15	14	3	74	102	42	25	29	16	11	35	17	26	12	29	7	63	66	8	18	16	24	42	42	47	10	16	13	31	26	32	14	25	16	63	30	98	28	20	19	69	32
5930403L14Rik	720.833	79	568	559	680	1270	1014	386	839	347	646	219	380	464	1183	830	378	892	506	767	523	787	830	1372	899	79	468	513	539	873	966	888	717	646	544	1325	536	682	524	728	659	1331	674	1931	784	897	453	829	417
5930412G12Rik	0.5625	0	2	1	1	0	0	0	0	0	0	0	0	0	0	1	0	0	3	0	0	0	2	3	0	4	0	0	0	2	0	1	0	0	0	0	0	0	4	1	0	0	0	2	0	0	0	0	0
5930430L01Rik	41.2917	15	63	39	34	73	64	21	45	31	54	69	42	31	46	41	27	54	16	40	36	24	42	52	53	31	29	24	25	42	56	60	38	30	39	39	30	34	33	39	25	60	34	107	52	53	24	41	25
5930438M14Rik	0.1875	0	0	0	0	0	0	0	0	0	0	0	0	0	0	0	0	0	0	1	0	0	0	0	0	0	0	0	0	1	0	1	0	0	1	1	0	2	0	1	0	0	0	0	0	0	1	0	0
6030407O03Rik	0.583333	0	4	0	1	0	0	0	0	0	0	1	1	0	0	0	0	0	0	0	0	0	2	1	0	0	0	0	0	3	0	0	1	1	0	2	2	2	1	0	0	1	0	2	0	0	1	2	0
6030408B16Rik	1.3125	0	0	1	2	1	0	1	0	0	3	9	0	1	0	1	1	0	0	0	0	0	2	5	0	16	1	0	1	1	1	0	0	0	1	3	0	4	0	1	0	1	2	2	1	1	0	0	0
6030419C18Rik	22.7917	5	16	12	17	47	36	15	21	9	21	26	23	23	21	24	6	16	12	23	22	17	18	46	45	137	5	8	17	23	33	19	16	14	17	26	15	29	12	17	15	20	13	42	17	20	18	24	15
6030440G07Rik	2.35417	0	0	2	5	2	5	1	0	0	7	13	10	2	3	0	1	3	2	1	1	0	0	3	0	2	1	3	1	2	0	2	2	2	0	6	2	0	0	1	1	1	2	5	2	3	2	6	2
6030443J06Rik	10.7708	2	13	16	13	13	4	6	25	3	20	3	6	2	22	9	5	11	6	7	8	11	17	22	6	12	15	9	14	7	11	11	8	18	9	16	14	13	9	5	6	13	10	17	9	10	5	16	7
6030458C11Rik	294.542	128	371	226	332	332	360	128	378	177	311	208	194	235	463	293	174	294	155	196	217	342	339	482	427	328	192	273	265	305	299	331	303	323	251	327	246	252	262	285	338	345	224	673	366	396	198	373	166
6030466F02Rik	0.0208333	0	0	0	0	0	0	0	0	0	0	0	0	0	0	0	0	0	0	0	0	0	0	0	0	0	0	0	0	0	0	0	0	0	0	0	0	0	0	0	0	0	0	1	0	0	0	0	0
6030468B19Rik	0.395833	0	0	0	1	1	0	0	0	0	0	0	0	0	0	0	2	0	0	0	0	0	0	1	1	2	1	1	0	0	0	0	1	1	0	0	0	0	1	1	1	0	0	0	1	1	0	2	0
6030469F06Rik	0.166667	0	0	0	0	0	3	0	2	1	0	0	0	0	0	0	0	1	0	0	0	1	0	0	0	0	0	0	0	0	0	0	0	0	0	0	0	0	0	0	0	0	0	0	0	0	0	0	0
6030471H07Rik	0	0	0	0	0	0	0	0	0	0	0	0	0	0	0	0	0	0	0	0	0	0	0	0	0	0	0	0	0	0	0	0	0	0	0	0	0	0	0	0	0	0	0	0	0	0	0	0	0
6030498E09Rik	0.0208333	0	0	0	0	0	0	0	0	0	0	0	0	0	0	0	0	0	0	1	0	0	0	0	0	0	0	0	0	0	0	0	0	0	0	0	0	0	0	0	0	0	0	0	0	0	0	0	0
6230400D17Rik	11.3125	2	5	8	13	11	23	3	14	6	19	26	17	9	19	10	2	11	6	12	5	7	12	34	6	14	6	8	10	11	11	13	12	12	3	8	10	9	7	9	11	10	9	27	12	11	7	12	13
6330403A02Rik	10.4167	1	15	8	11	14	11	6	11	6	10	3	10	5	19	8	1	8	5	7	11	12	16	16	14	13	3	8	7	12	14	13	9	7	4	20	6	9	9	7	10	18	13	36	14	9	8	10	7
6330403K07Rik	4.14583	0	0	0	2	9	5	1	1	2	12	7	8	0	3	1	2	9	0	2	2	1	5	10	11	8	3	0	3	4	1	3	3	8	2	5	4	5	4	2	1	3	5	9	6	6	1	11	4
6330407A03Rik	0.458333	0	0	0	0	0	0	0	0	0	0	4	0	0	0	0	0	0	0	0	1	0	0	0	3	7	0	0	0	0	2	0	1	0	1	0	0	0	1	0	0	0	0	0	0	0	1	1	0
6330408A02Rik	94.8542	40	87	81	74	134	133	40	124	46	123	113	118	103	123	69	52	104	56	61	65	71	96	180	188	140	61	71	77	93	92	108	71	80	67	92	83	99	55	75	76	113	66	216	97	110	67	170	66
6330409D20Rik	4.10417	0	6	4	5	4	5	0	2	3	7	16	2	4	1	5	1	5	3	0	3	5	3	7	8	6	2	2	2	4	7	8	2	2	1	3	1	3	3	2	3	7	5	11	6	7	2	4	4
6330410L21Rik	27.3958	0	49	11	34	39	36	14	42	14	31	13	39	32	44	27	9	38	14	14	10	31	33	52	58	0	8	9	18	34	35	35	14	26	15	26	16	37	14	23	15	34	23	94	36	30	23	32	25
6330415B21Rik	1.58333	0	10	2	3	0	0	1	0	2	0	3	0	0	11	1	3	0	0	0	0	0	4	1	1	1	4	3	6	0	2	0	0	2	2	0	1	0	3	1	0	1	1	1	4	1	0	1	0
6330415G19Rik	12.375	2	14	6	12	17	15	2	16	6	25	45	26	4	14	16	5	6	3	10	8	11	12	24	22	4	12	17	10	15	8	14	7	2	4	7	8	6	6	12	10	19	9	31	18	15	6	17	9
6330416G13Rik	188.458	69	202	166	247	210	163	75	237	87	135	123	139	148	304	200	122	130	69	76	157	233	245	258	218	283	130	212	202	261	245	236	215	285	202	146	192	163	206	198	200	145	95	380	224	293	122	248	103
6330418K02Rik	8.39583	2	8	8	8	19	3	5	10	5	12	14	16	9	3	8	3	12	5	4	5	2	7	13	8	13	7	9	6	10	7	9	4	7	3	5	10	6	5	9	12	13	9	21	10	9	8	9	9
6330549D23Rik	86.9375	30	100	94	100	124	151	33	115	47	71	33	30	83	149	102	44	91	51	50	67	92	85	124	94	89	61	75	90	114	100	99	81	89	89	100	75	104	82	77	82	98	60	201	101	108	58	119	54
6430411K18Rik	0	0	0	0	0	0	0	0	0	0	0	0	0	0	0	0	0	0	0	0	0	0	0	0	0	0	0	0	0	0	0	0	0	0	0	0	0	0	0	0	0	0	0	0	0	0	0	0	0
6430503K07Rik	0.0208333	0	0	0	0	0	0	0	0	0	0	0	0	0	0	0	0	0	0	0	0	0	0	0	0	0	0	0	0	0	0	0	0	0	0	0	0	0	0	0	0	0	0	0	0	0	0	1	0
6430531B16Rik	1.95833	0	0	2	1	4	2	0	1	4	2	3	6	2	0	3	3	0	1	0	1	2	5	10	6	3	2	1	3	0	3	1	2	2	0	1	1	1	0	1	2	1	0	2	2	1	0	6	1
6430548M08Rik	204.312	78	131	164	205	245	253	101	248	116	218	180	232	244	234	170	99	280	147	193	140	145	175	519	522	269	78	114	107	167	222	270	121	141	93	239	190	267	137	162	165	246	194	596	203	241	126	259	113
6430550D23Rik	17.875	3	15	15	20	13	18	5	35	3	18	19	12	22	31	10	10	15	12	18	12	21	22	48	32	11	12	10	11	23	26	13	27	23	10	18	11	16	8	17	12	17	11	40	20	23	11	34	15
6430562O15Rik	3.75	0	0	13	4	5	2	2	0	1	2	1	4	2	8	3	3	5	1	2	5	2	3	15	5	4	3	2	4	7	6	0	5	2	1	7	6	6	3	3	3	6	1	3	3	8	2	4	2
6430571L13Rik	75.8542	11	61	53	20	156	145	50	62	27	114	72	78	60	77	40	11	77	36	50	78	54	68	115	98	18	46	45	80	77	120	117	44	48	60	114	96	72	58	28	40	163	82	262	56	65	25	173	96
6430573F11Rik	48.7292	14	44	41	60	74	59	31	44	19	62	70	80	35	64	57	23	52	21	22	30	34	55	85	92	14	29	31	33	61	59	54	43	43	33	62	45	45	35	45	36	75	47	123	47	36	21	109	39
6430584L05Rik	0.25	0	6	1	0	0	0	0	1	0	0	0	0	0	0	0	0	0	0	0	0	0	0	0	0	0	0	0	0	0	1	0	0	0	0	0	0	0	0	0	0	0	1	1	0	0	0	1	0
6430706D22Rik	0	0	0	0	0	0	0	0	0	0	0	0	0	0	0	0	0	0	0	0	0	0	0	0	0	0	0	0	0	0	0	0	0	0	0	0	0	0	0	0	0	0	0	0	0	0	0	0	0
6430710C18Rik	0.208333	0	0	1	0	0	0	0	1	0	0	0	0	0	0	0	0	0	3	0	0	0	0	0	1	0	0	0	0	1	0	0	1	0	0	0	0	0	0	0	0	1	0	1	0	0	0	0	0
6530402F18Rik	49.1667	15	29	44	44	76	64	19	30	32	35	54	53	67	44	31	18	64	35	28	36	42	51	115	100	206	15	24	25	47	62	56	55	36	20	51	50	44	42	48	48	54	29	113	55	43	20	55	34
6530403H02Rik	2.25	0	0	0	4	4	2	4	3	0	5	0	2	5	0	1	1	5	2	2	2	11	4	1	1	6	0	0	1	1	2	2	2	0	0	4	1	1	1	1	6	1	3	8	3	3	1	1	1
6530411M01Rik	0.0833333	0	0	0	0	0	0	0	0	0	0	0	0	0	3	0	0	0	0	0	0	0	0	0	0	0	0	0	0	0	0	0	0	0	0	0	0	0	0	0	0	0	0	0	0	0	1	0	0
6720468P15Rik	0.0625	0	0	0	0	0	0	0	0	0	0	0	0	0	0	0	0	0	0	0	0	0	0	0	0	1	0	0	0	0	0	1	0	0	0	0	0	0	0	0	0	1	0	0	0	0	0	0	0
6720483E21Rik	0.583333	0	0	0	0	1	1	1	0	0	5	0	1	0	0	0	0	3	0	0	0	0	1	1	1	2	1	0	0	0	0	0	0	1	0	1	0	2	1	0	0	0	1	1	2	0	0	1	0
6720489N17Rik	19.5833	7	19	18	22	17	22	15	17	8	13	29	24	19	20	14	11	28	9	13	16	18	13	23	40	33	8	22	17	18	23	32	25	20	16	18	17	18	19	25	16	18	24	46	18	21	11	20	7
6820408C15Rik	14.1667	2	11	22	18	27	34	7	19	4	7	24	14	13	19	16	6	15	13	13	15	10	22	27	17	2	10	7	9	15	7	19	11	7	7	27	6	10	13	8	13	16	18	28	13	14	13	14	11
6820431F20Rik	1421.75	594	1686	1004	1584	1339	1759	594	1521	915	1743	1518	1412	1167	2260	1430	728	1681	803	1041	924	1656	1369	2312	2228	1476	731	1037	1090	1374	1391	1795	1501	1447	961	1318	1114	1101	1275	1420	1424	1997	1258	3939	1816	1824	957	1806	818
7420426K07Rik	0	0	0	0	0	0	0	0	0	0	0	0	0	0	0	0	0	0	0	0	0	0	0	0	0	0	0	0	0	0	0	0	0	0	0	0	0	0	0	0	0	0	0	0	0	0	0	0	0
7420461P10Rik	0.0208333	0	0	0	0	0	0	0	0	0	0	0	0	0	0	0	0	0	0	0	0	0	0	0	0	0	0	0	0	0	0	0	0	0	0	1	0	0	0	0	0	0	0	0	0	0	0	0	0
7420700N18Rik	0.0208333	0	0	0	0	0	0	0	0	0	0	0	0	0	0	0	0	0	0	0	0	0	0	0	0	0	0	0	0	0	0	0	0	0	0	0	0	1	0	0	0	0	0	0	0	0	0	0	0
7420701I03Rik	0	0	0	0	0	0	0	0	0	0	0	0	0	0	0	0	0	0	0	0	0	0	0	0	0	0	0	0	0	0	0	0	0	0	0	0	0	0	0	0	0	0	0	0	0	0	0	0	0
7530416G11Rik	0.0625	0	0	0	0	0	0	1	0	0	0	0	0	0	0	0	0	0	0	0	0	0	0	0	0	0	0	0	0	0	0	0	0	0	0	0	0	0	0	0	0	0	0	0	1	0	0	0	1
7630403G23Rik	0.0208333	0	0	0	0	0	0	0	0	0	0	0	0	0	0	0	0	0	0	0	0	0	0	0	0	0	0	0	0	0	0	0	0	0	0	0	0	0	0	1	0	0	0	0	0	0	0	0	0
8030411F24Rik	0	0	0	0	0	0	0	0	0	0	0	0	0	0	0	0	0	0	0	0	0	0	0	0	0	0	0	0	0	0	0	0	0	0	0	0	0	0	0	0	0	0	0	0	0	0	0	0	0
8030423F21Rik	0.208333	0	0	0	0	0	0	0	0	0	0	1	0	0	0	0	0	0	0	0	0	0	0	0	3	0	0	0	0	0	0	0	2	0	0	0	0	0	0	0	0	0	0	0	0	1	1	1	1
8030423J24Rik	0.0416667	0	0	0	0	0	0	0	0	0	0	0	0	0	0	0	0	1	0	0	0	0	0	0	0	0	0	0	0	0	0	0	0	0	0	0	0	0	0	0	0	0	0	0	0	0	0	1	0
8030442B05Rik	0.0208333	0	0	0	0	0	0	0	0	0	0	0	0	1	0	0	0	0	0	0	0	0	0	0	0	0	0	0	0	0	0	0	0	0	0	0	0	0	0	0	0	0	0	0	0	0	0	0	0
8030443G20Rik	0	0	0	0	0	0	0	0	0	0	0	0	0	0	0	0	0	0	0	0	0	0	0	0	0	0	0	0	0	0	0	0	0	0	0	0	0	0	0	0	0	0	0	0	0	0	0	0	0
8030451O07Rik	0.0208333	0	0	0	0	0	0	0	0	0	0	0	0	0	1	0	0	0	0	0	0	0	0	0	0	0	0	0	0	0	0	0	0	0	0	0	0	0	0	0	0	0	0	0	0	0	0	0	0
8030455M16Rik	0	0	0	0	0	0	0	0	0	0	0	0	0	0	0	0	0	0	0	0	0	0	0	0	0	0	0	0	0	0	0	0	0	0	0	0	0	0	0	0	0	0	0	0	0	0	0	0	0
8030462N17Rik	158.021	29	151	139	227	174	132	66	161	81	114	29	60	119	325	187	110	205	72	119	97	197	196	294	247	153	115	144	173	126	145	184	168	216	109	197	112	136	174	185	219	258	148	387	169	199	96	152	66
8430408G22Rik	278.5	67	117	189	321	140	223	132	726	357	609	457	423	854	471	186	144	165	86	172	326	287	484	233	806	377	74	69	81	139	579	343	206	314	90	123	148	165	99	285	207	323	185	662	195	243	67	239	67
8430419L09Rik	457.083	181	400	334	393	738	693	261	506	198	420	279	377	425	594	454	181	560	277	376	283	396	524	944	721	314	284	280	309	561	599	560	408	393	305	641	400	476	320	368	359	789	451	1273	428	539	257	687	317
8430422H06Rik	0	0	0	0	0	0	0	0	0	0	0	0	0	0	0	0	0	0	0	0	0	0	0	0	0	0	0	0	0	0	0	0	0	0	0	0	0	0	0	0	0	0	0	0	0	0	0	0	0
8430423G03Rik	2.33333	0	4	1	1	3	4	5	1	0	8	5	5	3	3	0	6	2	2	1	2	3	1	0	2	3	0	1	0	4	2	0	1	4	1	1	8	4	1	0	1	1	1	7	2	4	1	2	1
8430426J06Rik	3.72917	0	6	1	6	2	6	1	1	5	0	6	0	7	16	2	3	1	2	1	1	10	3	3	12	2	1	1	7	2	3	8	0	3	4	2	0	3	0	1	5	7	10	12	2	5	2	1	1
8430429K09Rik	59.5417	27	86	59	83	49	70	36	84	34	63	61	70	59	69	55	49	40	27	39	60	38	84	83	71	54	42	44	62	53	63	75	48	55	68	61	48	64	28	46	57	72	56	139	82	79	29	96	37
8430430B14Rik	0	0	0	0	0	0	0	0	0	0	0	0	0	0	0	0	0	0	0	0	0	0	0	0	0	0	0	0	0	0	0	0	0	0	0	0	0	0	0	0	0	0	0	0	0	0	0	0	0
8430431K14Rik	1.60417	0	0	0	1	2	4	1	1	0	1	16	6	0	1	2	2	0	1	1	0	3	3	1	4	7	0	0	1	1	2	3	0	1	0	1	1	0	0	0	0	0	1	1	0	2	0	2	3
8430436N08Rik	0	0	0	0	0	0	0	0	0	0	0	0	0	0	0	0	0	0	0	0	0	0	0	0	0	0	0	0	0	0	0	0	0	0	0	0	0	0	0	0	0	0	0	0	0	0	0	0	0
8430437L04Rik	0	0	0	0	0	0	0	0	0	0	0	0	0	0	0	0	0	0	0	0	0	0	0	0	0	0	0	0	0	0	0	0	0	0	0	0	0	0	0	0	0	0	0	0	0	0	0	0	0
9030025P20Rik	477.604	205	580	406	504	534	574	205	558	252	560	634	472	437	692	477	227	496	208	333	345	438	531	719	821	383	342	437	426	512	509	559	453	462	399	459	399	449	411	430	452	628	372	1142	567	573	305	668	300
9030204H09Rik	0	0	0	0	0	0	0	0	0	0	0	0	0	0	0	0	0	0	0	0	0	0	0	0	0	0	0	0	0	0	0	0	0	0	0	0	0	0	0	0	0	0	0	0	0	0	0	0	0
9030404E10Rik	0.333333	0	0	0	1	1	0	0	0	0	0	0	0	0	2	0	0	2	0	0	0	1	0	0	0	0	0	0	0	0	0	2	0	0	0	0	0	0	1	1	0	0	0	0	0	0	0	0	0
9030612E09Rik	0.854167	0	3	1	0	2	2	0	0	0	1	0	1	0	2	3	0	2	0	0	0	0	0	0	4	0	0	0	0	2	0	2	0	3	0	2	1	1	0	0	3	0	0	2	0	4	0	0	0
9030617O03Rik	2225.17	846	3114	2386	3239	2507	2642	966	3317	1334	2334	1012	1324	1875	3529	2409	1197	1688	846	1022	1901	2465	3121	2901	2460	1079	1922	2254	2882	2216	2367	2151	2191	2648	2872	2198	2066	2268	1946	1774	2110	2350	1258	4265	3015	3425	1584	3187	1549
9030619P08Rik	355.458	18	115	46	72	686	858	302	73	42	536	683	624	339	156	44	66	514	271	554	29	90	117	1105	665	18	78	93	98	792	766	706	48	50	90	1051	290	525	70	72	140	585	296	931	55	98	54	868	914
9030624G23Rik	10.8958	2	3	9	10	12	11	8	12	7	19	12	2	8	22	15	7	9	8	7	10	5	10	17	17	15	5	6	11	11	12	11	20	6	5	8	7	11	6	11	14	14	10	36	13	14	8	14	5
9030624J02Rik	818.188	396	908	786	1005	1151	1077	397	1052	462	857	572	515	877	1252	749	413	940	415	525	619	748	882	1318	1201	919	557	704	780	950	977	1018	749	894	771	937	775	877	637	690	744	962	630	1736	872	938	396	1118	474
9030625G05Rik	18.3958	3	19	24	24	45	37	16	12	10	24	3	24	22	12	8	7	20	11	12	6	8	17	26	22	17	15	25	16	33	27	17	21	22	12	21	10	18	14	21	11	19	12	37	19	12	21	28	20
9130008F23Rik	32.6667	13	34	30	41	29	67	25	38	16	37	31	24	36	35	28	13	46	28	23	30	21	29	47	61	42	14	20	23	36	48	38	23	31	20	25	29	24	31	31	35	41	29	99	28	41	16	37	19
9130011E15Rik	203.979	84	278	154	175	278	303	84	195	92	197	126	132	213	309	215	101	230	125	147	139	208	201	396	334	167	121	172	202	237	233	258	163	192	160	250	231	226	172	149	188	282	177	527	187	242	113	289	133
9130015A21Rik	0.125	0	0	0	0	0	0	0	0	0	0	0	5	0	0	0	0	0	0	0	0	0	0	0	0	1	0	0	0	0	0	0	0	0	0	0	0	0	0	0	0	0	0	0	0	0	0	0	0
9130015L21Rik	0.0416667	0	0	0	0	0	1	0	0	0	0	0	0	0	0	0	0	0	0	0	0	0	0	0	0	0	0	0	0	0	0	0	0	0	0	0	0	0	0	0	0	0	0	1	0	0	0	0	0
9130019O22Rik	117.125	41	139	82	121	150	136	41	168	68	105	96	79	110	193	104	49	115	63	70	92	118	130	191	173	157	70	112	101	148	137	130	108	128	94	122	97	131	94	113	106	142	101	259	153	140	60	165	87
9130019P16Rik	5.22917	1	2	10	7	8	5	2	9	2	7	4	11	8	7	2	1	5	3	4	1	2	14	2	6	12	2	3	4	2	8	1	11	7	6	4	2	6	6	12	2	5	2	10	3	8	4	5	1
9130023H24Rik	105.729	36	167	100	130	121	143	36	135	51	101	87	110	79	139	93	52	94	46	69	74	158	136	137	124	71	89	118	119	125	85	107	118	103	122	113	81	96	84	110	99	114	78	175	172	147	64	173	59
9130024F11Rik	67.3125	25	71	61	60	107	98	25	53	29	98	103	90	63	90	56	30	78	38	53	43	72	84	83	74	36	50	63	46	93	80	88	34	53	60	83	63	68	52	48	58	91	72	149	73	64	61	111	50
9130204L05Rik	0	0	0	0	0	0	0	0	0	0	0	0	0	0	0	0	0	0	0	0	0	0	0	0	0	0	0	0	0	0	0	0	0	0	0	0	0	0	0	0	0	0	0	0	0	0	0	0	0
9130209A04Rik	0.0416667	0	0	0	0	0	1	0	0	0	0	0	0	0	0	0	0	0	0	0	0	0	0	0	0	0	0	0	0	1	0	0	0	0	0	0	0	0	0	0	0	0	0	0	0	0	0	0	0
9130221F21Rik	0.0416667	0	0	0	0	0	0	1	0	0	0	0	0	0	0	0	0	0	0	0	0	0	0	0	0	0	0	0	0	0	0	1	0	0	0	0	0	0	0	0	0	0	0	0	0	0	0	0	0
9130221H12Rik	58.625	20	57	53	53	78	67	20	73	25	87	64	82	53	73	43	33	41	37	37	40	52	67	98	120	104	24	47	44	66	70	60	45	43	44	61	44	62	47	48	54	79	49	125	65	59	42	99	38
9130227L01Rik	0.333333	0	0	0	0	3	1	0	3	0	0	0	0	1	0	0	0	1	0	0	0	0	0	1	0	0	0	0	0	2	0	0	2	0	0	0	0	1	0	0	0	0	0	0	0	0	0	1	0
9130230L23Rik	6.375	1	7	2	3	1	3	2	9	1	9	21	10	5	3	1	4	5	5	4	4	2	9	14	16	8	3	6	6	5	8	9	6	7	5	5	8	5	4	1	9	6	3	20	7	8	3	9	6
9130401M01Rik	160.271	50	137	158	195	191	240	78	166	50	166	171	153	141	243	160	84	136	67	97	130	138	173	274	273	276	105	134	160	199	166	165	126	146	139	165	131	156	131	137	135	182	112	334	189	227	90	259	98
9130409I23Rik	4.45833	0	4	5	7	2	9	1	6	1	6	5	3	6	1	4	0	1	1	2	2	4	4	3	5	2	4	6	4	5	11	9	5	7	10	7	15	6	4	2	3	7	1	10	1	2	2	4	3
9130409J20Rik	14.3125	0	3	5	6	8	1	2	7	2	0	0	1	0	29	22	9	38	9	28	43	34	19	6	1	41	1	5	1	1	8	13	42	8	0	12	0	0	18	17	22	49	18	76	7	66	2	1	6
9230009I02Rik	0	0	0	0	0	0	0	0	0	0	0	0	0	0	0	0	0	0	0	0	0	0	0	0	0	0	0	0	0	0	0	0	0	0	0	0	0	0	0	0	0	0	0	0	0	0	0	0	0
9230102K24Rik	0.0208333	0	0	0	0	0	0	0	0	0	0	0	0	0	0	0	0	0	0	0	0	0	0	0	0	0	0	0	0	0	0	0	0	0	0	0	0	0	0	0	0	0	0	0	0	0	0	0	0
9230102O04Rik	24.4167	7	15	12	15	35	41	10	18	17	36	50	45	20	30	19	10	21	12	32	15	20	15	40	58	13	15	15	17	27	24	21	24	17	7	22	21	28	20	13	16	36	24	73	24	30	11	51	21
9230104L09Rik	0.0208333	0	0	0	0	0	0	0	0	0	0	0	0	0	0	0	0	0	0	0	0	0	0	0	0	0	0	0	0	0	0	0	0	0	0	1	0	0	0	0	0	0	0	0	0	0	0	0	0
9230105E05Rik	11.1667	0	0	0	1	15	22	2	0	0	29	27	25	25	2	0	1	9	9	14	0	0	0	47	26	11	0	0	0	14	11	11	1	1	0	34	18	22	0	0	1	14	12	28	3	0	3	43	23
9230110C19Rik	54.2292	17	74	45	38	80	66	29	43	20	64	17	65	45	81	40	25	89	31	47	31	55	51	109	86	32	41	47	52	74	72	61	35	38	52	60	47	52	47	49	42	74	49	141	61	69	23	92	28
9230110F15Rik	0	0	0	0	0	0	0	0	0	0	0	0	0	0	0	0	0	0	0	0	0	0	0	0	0	0	0	0	0	0	0	0	0	0	0	0	0	0	0	0	0	0	0	0	0	0	0	0	0
9230112D13Rik	0.270833	0	0	0	0	2	0	1	0	0	0	2	0	0	0	0	0	2	0	0	0	0	0	0	0	0	0	0	0	0	2	0	0	0	1	0	0	0	0	1	0	0	1	1	0	0	0	0	0
9230112J17Rik	7.16667	0	6	4	7	9	3	4	16	7	8	7	7	5	4	10	5	10	1	11	8	5	7	3	14	3	3	5	5	10	6	14	5	5	2	11	8	7	6	9	8	9	13	27	6	10	3	4	0
9230114K14Rik	35.1458	15	41	22	44	52	44	23	39	25	48	28	57	24	41	45	21	25	17	16	29	34	28	64	50	15	21	36	29	43	38	30	21	38	24	35	38	36	28	32	31	41	19	70	48	46	16	71	24
9230116L04Rik	1.6875	0	1	0	3	2	2	0	0	3	5	0	8	1	4	1	1	1	3	0	0	0	1	4	6	0	0	0	2	1	4	1	0	2	1	0	1	3	3	0	2	4	1	6	0	2	1	1	0
9230116N13Rik	5.52083	0	4	4	7	5	5	3	4	2	8	10	2	4	7	5	2	0	8	2	3	2	4	10	2	22	2	3	2	5	8	8	9	7	6	8	7	2	6	7	6	4	9	10	9	6	2	10	1
9230117E06Rik	0.291667	0	0	1	1	0	0	0	0	1	0	0	0	0	0	0	0	1	1	0	1	0	0	0	0	0	0	1	0	0	0	0	0	1	0	0	0	0	0	0	1	0	0	3	1	0	0	0	1
9330020H09Rik	37.125	13	40	39	36	48	60	18	43	13	42	78	37	27	58	39	16	31	21	21	22	27	43	76	55	34	26	35	36	31	34	31	35	27	30	35	27	41	27	34	30	42	33	78	49	42	28	56	35
9330102E08Rik	6.0625	0	3	8	9	9	9	2	0	2	7	8	4	2	17	4	4	5	3	8	2	7	10	5	7	6	3	2	7	9	4	11	1	10	3	8	4	7	5	5	1	14	8	13	11	7	4	8	0
9330111N05Rik	0.0833333	0	0	0	1	0	0	0	0	0	0	0	0	0	1	0	0	0	0	0	0	0	0	0	0	0	0	0	0	0	0	0	0	0	0	1	0	0	0	0	0	1	0	0	0	0	0	0	0
9330117O12Rik	0.0208333	0	0	0	0	0	0	0	0	0	0	0	0	0	0	0	0	1	0	0	0	0	0	0	0	0	0	0	0	0	0	0	0	0	0	0	0	0	0	0	0	0	0	0	0	0	0	0	0
9330133O14Rik	81.3958	32	91	95	93	108	117	32	85	39	71	58	99	81	130	69	45	88	35	76	65	70	93	136	114	58	47	79	92	100	91	82	63	63	99	93	86	80	61	45	54	96	49	176	103	83	49	136	75
9330136K24Rik	11.3125	2	5	9	9	11	18	4	15	7	19	18	17	5	8	15	2	15	10	6	4	15	17	15	17	24	3	6	3	17	8	13	11	8	11	9	5	14	5	5	7	9	12	34	17	14	10	17	12
9330151L19Rik	111.354	34	183	100	108	114	167	34	111	66	181	209	149	75	183	115	46	107	40	69	100	109	121	165	137	80	73	103	90	117	108	114	93	105	92	92	95	85	86	104	92	122	80	254	118	151	80	146	99
9330158H04Rik	0.416667	0	3	0	1	0	1	0	1	0	0	0	0	1	1	0	0	0	0	2	0	0	0	1	0	0	0	0	0	0	2	0	1	0	0	0	0	0	0	0	0	0	1	1	1	0	2	0	1
9330159F19Rik	1.97917	0	0	0	0	2	1	0	2	7	0	1	4	0	4	0	1	0	0	2	0	0	0	1	9	5	0	0	0	1	2	4	1	0	2	1	1	4	0	0	2	8	1	13	2	8	1	5	0
9330159M07Rik	23.6458	5	21	15	28	33	38	16	16	6	24	7	36	19	18	18	13	24	14	19	12	36	11	44	36	5	21	29	21	47	33	43	31	22	20	33	11	25	11	17	21	39	19	57	21	15	12	42	15
9330162012Rik	15.8958	3	13	11	28	19	25	7	20	16	24	7	3	9	21	9	8	14	9	16	18	24	19	20	33	15	6	13	15	21	13	14	14	18	6	25	6	9	15	22	16	25	7	36	20	20	17	14	12
9330162B11Rik	0.8125	0	5	0	1	1	0	0	0	2	0	2	0	1	3	1	0	0	1	0	0	2	2	0	2	0	0	0	0	0	0	1	1	1	0	0	0	0	2	2	1	1	0	5	0	0	1	1	0
9330175E14Rik	3.85417	0	6	1	2	9	1	3	1	1	11	0	2	1	6	8	1	6	0	0	1	4	3	5	3	30	0	4	0	1	3	4	18	1	2	7	0	1	1	6	2	5	1	12	5	3	0	1	0
9330175M20Rik	0.166667	0	0	0	0	0	1	0	1	0	0	0	0	0	0	0	0	2	0	0	0	0	0	0	0	0	0	0	0	0	0	0	0	0	0	0	0	0	0	0	0	0	0	0	1	0	1	0	0
9330178D15Rik	0	0	0	0	0	0	0	0	0	0	0	0	0	0	0	0	0	0	0	0	0	0	0	0	0	0	0	0	0	0	0	0	0	0	0	0	0	0	0	0	0	0	0	0	0	0	0	0	0
9330179D12Rik	1.02083	0	0	1	0	2	0	0	0	0	0	1	0	2	1	0	0	2	0	0	1	3	2	0	0	12	1	0	0	2	2	0	2	1	0	1	0	0	0	0	1	2	0	2	1	2	2	1	1
9330182L06Rik	3.6875	0	4	0	1	8	12	1	8	3	2	6	1	2	12	2	0	4	0	2	2	0	3	6	6	2	1	0	0	5	0	1	3	4	4	11	8	1	3	1	6	13	4	5	1	5	0	10	0
9330182O14Rik	0.0416667	0	0	0	0	0	0	0	0	0	0	0	0	0	0	0	0	0	0	0	0	0	0	0	0	0	0	0	0	0	1	0	0	1	0	0	0	0	0	0	0	0	0	0	0	0	0	0	0
9330188P03Rik	2.41667	0	2	3	2	2	2	0	3	0	3	3	5	1	7	1	2	5	1	0	4	0	3	8	3	10	2	0	2	3	2	2	0	4	2	3	1	3	3	2	1	4	1	1	4	2	1	1	2
9330199G10Rik	0	0	0	0	0	0	0	0	0	0	0	0	0	0	0	0	0	0	0	0	0	0	0	0	0	0	0	0	0	0	0	0	0	0	0	0	0	0	0	0	0	0	0	0	0	0	0	0	0
9430007A20Rik	0	0	0	0	0	0	0	0	0	0	0	0	0	0	0	0	0	0	0	0	0	0	0	0	0	0	0	0	0	0	0	0	0	0	0	0	0	0	0	0	0	0	0	0	0	0	0	0	0
9430014N10Rik	0	0	0	0	0	0	0	0	0	0	0	0	0	0	0	0	0	0	0	0	0	0	0	0	0	0	0	0	0	0	0	0	0	0	0	0	0	0	0	0	0	0	0	0	0	0	0	0	0
9430015G10Rik	96.9375	36	74	87	112	125	106	47	111	36	121	171	145	93	144	75	46	107	61	61	47	88	159	150	213	186	47	59	64	96	132	90	70	94	52	88	77	81	48	67	93	127	69	226	96	138	55	118	64
9430016H08Rik	285.625	108	328	332	409	378	420	136	349	141	318	219	225	303	437	256	154	274	108	146	214	295	403	401	420	203	206	306	324	354	347	335	268	279	248	277	258	269	233	199	262	307	194	536	329	385	155	399	203
9430018G01Rik	0.25	0	0	0	0	0	0	0	0	0	1	0	1	0	0	0	0	0	1	1	0	0	2	1	0	0	0	0	0	0	0	0	0	0	0	0	0	0	0	0	1	0	1	0	2	0	1	0	0
9430019J16Rik	0	0	0	0	0	0	0	0	0	0	0	0	0	0	0	0	0	0	0	0	0	0	0	0	0	0	0	0	0	0	0	0	0	0	0	0	0	0	0	0	0	0	0	0	0	0	0	0	0
9430020K01Rik	246.458	77	148	156	275	274	331	120	263	134	241	241	281	229	355	196	134	465	193	245	145	223	225	612	506	469	91	127	114	216	295	360	135	170	77	260	174	249	173	196	229	315	244	757	247	298	136	228	135
9430021M05Rik	0	0	0	0	0	0	0	0	0	0	0	0	0	0	0	0	0	0	0	0	0	0	0	0	0	0	0	0	0	0	0	0	0	0	0	0	0	0	0	0	0	0	0	0	0	0	0	0	0
9430037G07Rik	21.375	6	16	17	22	23	54	14	11	14	26	10	18	23	29	16	12	29	13	19	6	25	18	35	38	16	17	16	12	30	25	37	23	17	17	24	9	9	7	21	11	41	16	53	24	42	13	25	14
9430038I01Rik	42.6042	18	48	33	54	79	75	24	66	19	35	44	36	38	40	31	22	36	27	27	39	31	53	87	90	37	21	27	26	71	42	40	31	32	28	40	42	48	19	18	23	63	25	90	51	64	18	82	28
9430041J12Rik	0.541667	0	0	0	0	1	1	0	0	0	3	0	1	2	0	0	2	2	0	1	0	0	0	0	0	0	0	0	1	0	0	0	0	1	1	1	0	1	0	1	0	1	1	1	0	0	2	2	0
9430060I03Rik	4.0625	0	0	2	6	11	3	0	2	0	9	2	1	2	11	2	2	1	4	5	4	0	2	11	12	9	1	2	4	4	7	3	6	1	3	1	1	3	3	4	7	6	3	14	2	5	3	5	2
9430065F17Rik	14.0417	3	16	9	19	8	11	5	19	10	18	20	21	7	25	11	18	23	11	8	6	3	20	21	27	15	7	9	14	9	14	14	13	10	4	14	16	5	15	13	18	9	11	27	20	24	10	24	11
9430069I07Rik	0	0	0	0	0	0	0	0	0	0	0	0	0	0	0	0	0	0	0	0	0	0	0	0	0	0	0	0	0	0	0	0	0	0	0	0	0	0	0	0	0	0	0	0	0	0	0	0	0
9430076C15Rik	1.29167	0	0	0	0	1	1	0	6	1	4	1	0	1	0	0	0	1	0	0	0	0	3	4	2	18	0	2	1	0	0	0	0	3	0	1	0	2	1	1	0	1	1	1	1	0	1	2	1
9430078K24Rik	0.625	0	3	0	0	0	0	0	0	0	0	0	0	1	1	0	0	0	0	2	1	0	8	3	0	1	1	0	0	0	0	0	1	0	0	1	0	0	0	2	0	0	2	1	0	0	0	0	1
9430083A17Rik	27.1042	9	37	28	24	53	53	9	26	12	26	31	36	23	26	29	10	29	11	19	19	23	23	53	29	17	19	12	19	31	32	34	21	15	24	29	33	26	15	13	20	36	28	55	33	46	12	59	22
9430091E24Rik	70	30	89	56	86	68	104	31	65	33	61	90	46	72	97	75	44	66	46	52	30	66	115	98	102	48	49	75	66	83	67	81	75	66	66	78	65	55	67	70	82	98	52	173	72	83	35	80	45
9530002B09Rik	0	0	0	0	0	0	0	0	0	0	0	0	0	0	0	0	0	0	0	0	0	0	0	0	0	0	0	0	0	0	0	0	0	0	0	0	0	0	0	0	0	0	0	0	0	0	0	0	0
9530003J23Rik	0.0416667	0	0	1	0	0	0	0	0	0	0	0	0	0	0	0	0	0	0	0	0	0	0	0	0	0	0	0	0	0	0	0	0	0	0	0	0	0	0	0	0	0	0	0	0	0	0	1	0
9530014B07Rik	1.25	0	2	1	0	0	0	0	0	0	0	0	0	0	2	3	0	1	0	3	1	1	1	2	2	27	1	1	0	0	0	0	0	0	0	1	0	0	2	0	2	3	2	2	0	0	0	0	0
9530020I12Rik	0.458333	0	0	0	3	0	0	3	0	3	2	0	0	0	0	0	0	0	0	0	0	0	0	0	0	2	0	0	1	0	1	2	0	0	0	2	1	0	1	0	0	1	0	0	0	0	0	0	0
9530026F06Rik	0.270833	0	0	0	0	1	1	0	0	0	0	0	3	0	0	1	0	0	0	0	0	0	0	0	0	0	0	0	2	0	1	1	0	1	0	0	0	0	0	0	0	0	0	1	0	0	0	1	0
9530026P05Rik	9.72917	0	5	6	8	9	11	6	17	5	2	11	10	12	24	10	2	3	10	5	2	4	9	12	28	25	4	0	2	9	7	13	8	8	3	11	6	8	9	5	9	16	7	39	19	15	12	12	4
9530027J09Rik	4.29167	0	8	1	5	8	1	2	7	1	4	19	9	6	1	6	1	5	5	3	2	9	0	8	3	3	3	2	0	3	3	5	4	8	0	2	3	5	1	5	3	8	2	8	2	4	2	10	5
9530036O11Rik	0.958333	0	1	2	0	0	0	0	1	0	0	3	2	1	0	0	1	2	0	0	1	0	2	4	2	3	1	1	1	0	1	0	0	0	0	0	1	2	1	0	0	0	0	2	2	2	2	1	3
9530051G07Rik	3.83333	0	0	2	2	8	2	1	2	7	9	4	0	1	7	1	1	14	0	3	3	6	3	6	14	1	2	5	1	5	3	4	4	3	4	2	3	2	7	2	1	9	1	10	4	2	1	8	2
9530052E02Rik	4.625	0	0	5	8	9	12	0	0	4	6	6	13	2	10	5	3	6	5	3	6	10	5	2	1	2	2	7	1	2	5	5	11	1	1	3	0	4	7	2	3	9	8	11	6	5	0	4	2
9530053A07Rik	16.0833	0	3	4	2	10	6	4	17	7	14	8	8	6	30	20	11	24	20	27	49	37	13	12	18	9	1	2	1	4	5	3	52	5	4	42	5	7	10	11	13	40	29	74	11	77	1	11	5
9530059O14Rik	0	0	0	0	0	0	0	0	0	0	0	0	0	0	0	0	0	0	0	0	0	0	0	0	0	0	0	0	0	0	0	0	0	0	0	0	0	0	0	0	0	0	0	0	0	0	0	0	0
9530062K07Rik	11.1458	1	20	6	16	22	14	2	17	9	30	11	9	14	8	7	7	6	11	7	8	7	13	14	12	1	7	13	14	11	13	19	6	11	8	8	8	10	6	7	6	17	9	23	9	11	12	25	7
9530068E07Rik	3410.96	1523	5376	3396	4725	3979	4416	1533	4478	1941	3123	1523	2370	2872	5793	3464	1712	3080	1615	1934	2644	3866	4607	4471	4105	2671	2795	3878	4345	3899	3959	4098	2978	3725	3916	3433	2915	3129	2937	2876	3398	3643	2219	6518	4127	4496	2069	4544	2277
9530077C05Rik	25.8958	6	18	27	30	23	36	12	29	6	39	6	48	17	37	16	10	32	13	20	13	22	39	49	42	29	19	24	21	29	17	12	34	33	26	35	19	25	21	14	19	25	22	71	50	33	16	39	11
9530080O11Rik	5.27083	0	4	5	7	6	5	2	7	3	5	3	0	4	6	6	5	5	1	5	2	10	3	10	1	0	2	5	5	5	8	6	5	8	7	10	6	8	4	7	8	9	2	8	15	7	4	8	0
9530082P21Rik	376.688	150	412	356	384	465	463	166	428	152	405	602	533	293	498	359	150	334	166	203	341	362	432	678	567	444	233	370	368	419	395	374	353	328	300	408	298	385	255	295	308	439	242	816	493	476	188	578	325
9530091C08Rik	8.70833	0	1	5	7	6	15	3	12	0	11	19	8	8	15	9	3	15	3	2	5	11	11	20	12	21	2	13	4	10	6	8	10	12	7	8	5	8	5	6	4	7	5	25	12	5	6	12	8
9630001P10Rik	1.41667	0	3	0	0	2	7	2	0	0	5	0	0	1	2	1	0	1	3	0	1	0	6	1	3	1	0	0	2	4	3	1	1	0	0	2	2	0	0	1	0	3	0	2	1	1	0	0	4
9630013A20Rik	0.0208333	0	0	0	0	0	0	0	0	0	0	0	0	0	0	0	0	0	0	0	0	0	0	0	0	0	0	0	0	1	0	0	0	0	0	0	0	0	0	0	0	0	0	0	0	0	0	0	0
9630013K17Rik	5	0	6	10	3	7	8	2	5	5	1	2	4	2	3	5	4	10	3	7	4	13	4	12	6	3	3	2	1	5	4	3	4	7	6	4	2	2	9	11	4	11	6	13	4	2	5	1	0
9630028B13Rik	0.625	0	0	0	0	1	1	1	0	0	0	0	0	0	0	1	0	0	0	0	0	0	3	0	2	0	0	0	2	0	0	2	2	0	0	0	0	1	1	0	0	2	4	1	2	1	0	2	0
9630028H03Rik	0.0625	0	0	0	0	0	0	0	0	0	0	0	0	0	3	0	0	0	0	0	0	0	0	0	0	0	0	0	0	0	0	0	0	0	0	0	0	0	0	0	0	0	0	0	0	0	0	0	0
9630028I04Rik	2.89583	0	4	1	1	1	3	1	1	0	5	2	4	7	4	1	1	3	0	3	2	10	5	6	5	18	4	1	3	0	3	0	4	3	1	3	1	9	2	0	3	0	1	3	3	1	0	2	3
9830107B12Rik	0.145833	0	0	0	0	0	0	0	0	0	1	0	0	1	0	0	0	0	0	0	0	0	0	1	0	1	0	0	0	0	0	0	0	0	0	0	1	0	1	0	0	1	0	0	0	0	0	0	0
9830132P13Rik	0.333333	0	0	2	0	0	0	0	0	0	0	0	0	0	0	0	0	0	0	0	0	0	0	2	2	0	0	0	0	1	1	0	1	0	0	1	0	2	0	0	0	1	0	1	1	0	0	0	1
9830147E19Rik	75.2917	28	120	59	92	66	118	28	56	48	80	100	76	53	108	66	49	101	40	70	56	63	44	119	77	69	47	80	95	78	74	125	58	62	63	74	48	65	70	79	77	96	77	208	80	80	41	95	51
9830166K06Rik	0.0625	0	0	0	0	0	0	0	0	0	0	0	1	0	0	0	0	1	0	0	0	0	0	0	0	0	0	1	0	0	0	0	0	0	0	0	0	0	0	0	0	0	0	0	0	0	0	0	0
9930012K11Rik	20.9375	3	9	20	16	27	32	3	18	14	26	28	54	11	24	24	10	34	9	9	29	5	24	61	22	28	10	14	10	23	23	23	18	22	7	17	16	26	15	23	20	17	17	40	19	21	17	45	15
9930014A18Rik	45.4167	13	57	47	39	53	71	19	53	19	42	35	43	49	45	39	22	40	13	29	49	54	40	64	63	42	25	29	32	65	60	48	48	38	37	66	42	28	36	46	39	63	37	112	72	51	27	91	35
9930021J03Rik	431.208	188	370	287	454	401	542	199	366	263	553	564	485	408	721	438	233	596	269	292	266	527	419	789	788	436	188	318	339	429	468	521	434	411	320	469	373	431	343	410	385	567	345	1019	415	484	255	532	317
9930104L06Rik	149.479	66	138	122	146	194	225	66	190	73	160	204	187	147	193	130	84	166	86	100	107	144	180	266	269	169	96	127	119	145	151	154	132	124	126	152	98	147	107	108	139	183	107	394	182	162	87	192	109
9930111H07Rik	0.0416667	0	0	0	0	0	0	0	0	0	0	0	0	0	0	0	0	0	0	0	0	0	0	0	0	0	0	0	0	0	0	0	0	0	0	0	0	0	1	0	0	0	0	0	0	1	0	0	0
9930111J21Rik1	10.8958	1	8	1	8	11	15	2	7	7	13	14	12	9	18	14	2	30	7	16	5	26	8	31	23	34	4	2	4	5	8	9	23	5	1	17	7	10	6	15	9	11	10	20	7	13	1	7	6
9930111J21Rik2	15.375	2	4	2	3	14	7	8	23	8	13	9	19	2	23	7	8	43	9	13	3	21	11	45	29	105	5	5	8	7	5	17	30	8	4	31	14	10	9	14	14	11	10	28	23	13	7	13	10
a	0.0625	0	0	0	0	0	0	0	0	0	0	0	0	0	0	0	0	0	0	0	0	0	0	0	0	3	0	0	0	0	0	0	0	0	0	0	0	0	0	0	0	0	0	0	0	0	0	0	0
A130010J15Rik	68.1042	20	84	55	106	65	56	20	78	42	72	31	54	53	109	75	39	51	27	22	61	86	99	76	78	121	56	77	80	67	50	66	83	88	68	63	65	61	67	84	71	88	46	143	91	90	34	90	39
A130077B15Rik	0.520833	0	1	0	0	0	1	0	3	0	1	0	4	0	0	0	0	2	3	0	0	0	0	1	0	3	0	0	0	0	0	1	0	0	1	1	1	0	1	0	0	0	0	0	0	0	0	1	0
A1bg	1.58333	0	2	0	1	1	0	0	0	0	0	1	1	6	0	2	0	0	0	1	1	0	1	25	0	0	2	1	0	1	0	1	0	0	0	7	3	0	0	0	1	1	1	4	2	0	0	0	0
A1cf	506.438	85	619	554	607	478	458	156	620	461	461	147	108	278	1109	741	434	770	313	414	377	840	539	676	616	85	364	529	455	395	472	525	710	988	474	494	293	309	623	855	805	571	372	1104	468	626	290	404	177
A230001M10Rik	0.0208333	0	0	0	0	0	0	0	0	0	0	0	0	0	0	0	1	0	0	0	0	0	0	0	0	0	0	0	0	0	0	0	0	0	0	0	0	0	0	0	0	0	0	0	0	0	0	0	0
A230009B12Rik	0.0625	0	0	0	0	0	0	0	0	0	0	0	0	0	0	0	0	0	0	0	0	0	0	0	0	1	0	0	0	0	0	0	0	0	0	1	0	0	1	0	0	0	0	0	0	0	0	0	0
A230020J21Rik	1.0625	0	0	3	2	0	1	1	0	0	1	2	0	1	4	2	0	1	0	1	2	1	0	1	0	1	1	0	3	1	0	1	1	1	2	1	1	0	1	0	1	3	1	0	2	0	0	1	3
A230028O05Rik	2.5625	0	0	4	0	4	4	0	5	0	4	7	0	2	8	1	2	4	5	5	2	7	8	1	9	7	2	1	3	1	2	1	3	2	4	2	3	1	1	2	0	0	1	2	1	0	0	0	2
A230046K03Rik	500.583	198	735	436	741	432	583	198	562	342	498	410	285	333	799	578	294	533	226	332	329	748	584	746	606	442	353	490	565	419	471	590	591	640	472	505	336	402	491	620	566	636	401	1084	586	701	315	502	276
A230050P20Rik	110.583	34	103	89	90	126	131	34	132	42	156	272	210	125	163	100	41	110	44	80	82	77	89	231	198	309	44	55	55	93	70	95	123	85	72	126	88	104	51	66	81	112	77	256	94	130	40	181	102
A230056J06Rik	2	0	6	0	4	1	3	1	5	1	7	0	2	2	4	0	0	1	0	1	0	7	4	4	0	1	2	2	3	3	0	3	0	3	2	1	2	1	4	3	1	4	0	0	2	2	3	0	1
A230056P14Rik	23.8958	8	19	11	15	43	39	18	18	8	32	22	28	27	28	21	14	33	15	17	19	31	13	28	46	21	23	17	21	27	32	25	23	29	10	28	23	17	16	18	16	31	25	54	32	28	10	46	12
A230057D06Rik	0.354167	0	0	0	1	0	1	0	0	0	0	0	0	0	2	2	0	1	0	1	0	0	0	0	0	1	0	1	1	0	1	0	0	0	0	0	0	0	1	0	1	1	0	0	0	0	0	0	0
A230065H16Rik	0.625	0	0	0	0	1	2	0	0	0	3	0	0	0	1	0	0	2	0	0	0	0	0	0	3	4	0	0	1	0	0	2	0	1	1	0	0	3	0	0	0	1	2	1	1	1	0	0	0
A230070E04Rik	1.5	0	0	0	0	0	0	0	0	1	0	0	10	0	0	5	0	2	0	4	2	1	5	0	4	0	0	0	0	0	0	2	1	0	2	4	4	1	1	0	0	3	0	4	1	1	0	12	2
A230072C01Rik	74.375	24	104	58	65	82	82	33	80	30	135	92	75	59	90	61	27	70	24	39	37	86	82	115	95	71	59	55	60	94	83	80	62	67	71	65	50	64	71	56	58	102	61	205	141	104	54	114	53
A230072E10Rik	2.54167	0	9	0	2	5	3	1	2	0	2	4	5	1	4	1	2	2	1	3	3	1	1	4	6	2	0	3	2	3	2	4	2	3	6	2	4	2	2	0	1	1	1	8	1	1	2	4	2
A230077H06Rik	0.291667	0	0	0	0	0	0	1	0	0	2	1	1	0	0	0	0	0	0	0	0	1	0	1	0	2	0	0	0	1	0	0	0	0	0	0	0	1	1	0	1	0	0	0	0	1	0	0	0
A230103J11Rik	10.6458	3	16	8	12	11	14	6	19	6	3	11	13	9	9	9	6	10	3	11	4	13	8	34	21	9	7	9	10	8	7	11	11	3	7	13	7	5	12	15	16	9	7	30	14	9	7	15	6
A230108P19Rik	0.895833	0	0	0	0	0	0	0	0	0	1	2	0	0	1	1	0	0	2	0	2	1	1	0	0	0	0	2	0	2	5	0	0	1	1	1	0	0	2	0	0	1	2	4	2	3	2	2	0
A2m	6.25	0	4	7	4	7	25	3	0	0	3	3	10	10	1	2	1	10	7	5	0	0	1	23	0	5	5	6	2	1	3	15	7	0	1	58	2	8	2	0	1	3	11	21	1	3	0	8	9
A330009N23Rik	9.5625	2	11	10	11	13	5	6	15	3	5	9	12	17	13	9	6	11	8	7	6	5	15	24	24	13	4	6	2	8	9	17	6	9	3	14	6	7	8	3	13	12	10	33	7	12	3	3	4
A330015K06Rik	0.145833	0	0	0	2	0	0	0	0	0	0	0	0	0	0	0	0	0	0	0	1	0	0	1	0	0	0	0	0	0	0	0	0	1	0	0	0	0	0	1	0	0	0	0	0	1	0	0	0
A330023F24Rik	169.062	55	118	91	156	142	222	55	220	82	219	350	246	119	331	224	114	225	109	179	101	142	126	270	330	55	61	86	91	142	189	171	139	121	76	128	85	122	126	172	151	226	183	705	187	213	72	235	133
A330032B11Rik	2.58333	0	0	2	3	0	6	2	0	9	5	3	4	2	0	2	1	6	2	2	1	2	1	5	3	0	1	0	2	2	1	5	1	1	3	2	4	2	2	1	1	4	6	9	1	4	2	5	2
A330033J07Rik	31.5417	10	10	23	16	40	32	11	42	10	27	50	35	38	35	18	19	25	23	17	13	32	35	44	39	15	10	23	24	49	52	35	17	37	26	37	39	41	27	24	21	48	23	105	47	41	26	71	20
A330035P11Rik	47.7083	15	27	39	27	73	73	31	46	23	61	26	46	36	57	27	15	53	35	43	25	15	49	66	79	25	16	30	43	71	63	97	21	38	43	91	45	57	26	22	34	83	66	163	54	40	23	78	55
A330040F15Rik	98.1042	19	129	183	137	100	121	28	180	47	95	99	40	85	160	132	71	54	19	29	152	128	210	121	96	50	83	118	99	73	112	95	86	104	114	68	60	76	94	115	108	80	55	157	133	152	71	103	34
A330041J22Rik	3	0	0	4	3	3	3	1	8	4	3	1	1	5	0	4	2	4	1	1	1	3	2	6	6	1	3	5	1	2	2	1	3	5	5	3	0	2	0	2	2	3	6	13	5	5	4	3	0
A330048O09Rik	2.3125	0	4	2	0	2	3	0	0	2	0	0	6	4	2	0	4	1	1	2	1	5	2	3	9	0	1	2	1	5	4	1	1	0	2	3	0	2	3	3	1	4	3	7	4	2	0	7	0
A330049N07Rik	0.1875	0	2	0	0	0	0	0	0	0	0	0	4	0	1	0	0	0	0	1	0	0	0	0	0	0	0	0	0	0	0	0	0	0	0	0	0	0	0	1	0	0	0	0	0	0	0	0	0
A330050F15Rik	0.125	0	0	0	0	0	0	0	0	0	0	0	0	0	0	0	0	1	0	0	0	2	0	0	1	0	0	0	0	0	0	0	0	0	0	0	0	0	0	0	1	1	0	0	0	0	0	0	0
A330069E16Rik	10.3542	0	10	17	7	6	13	2	16	3	25	24	12	14	14	8	11	8	0	2	10	7	15	12	28	3	6	7	11	8	5	10	6	18	13	6	5	4	9	7	9	11	4	23	11	18	10	16	4
A330070K13Rik	0	0	0	0	0	0	0	0	0	0	0	0	0	0	0	0	0	0	0	0	0	0	0	0	0	0	0	0	0	0	0	0	0	0	0	0	0	0	0	0	0	0	0	0	0	0	0	0	0
A330074K22Rik	0.854167	0	3	0	0	0	1	0	0	0	2	0	0	2	3	1	0	1	0	1	1	0	0	5	0	1	0	0	0	0	0	0	2	0	0	4	0	0	0	1	1	3	1	2	4	1	0	1	0
A330076C08Rik	0.9375	0	0	0	1	0	1	0	2	0	0	1	0	2	2	0	0	2	2	1	1	0	0	2	2	0	1	1	0	1	2	2	0	0	1	2	0	0	2	1	0	1	0	5	0	1	1	4	0
A330076H08Rik	0.208333	0	0	0	0	0	4	0	0	1	0	0	0	0	0	0	0	0	0	0	0	0	0	0	0	0	0	2	0	0	0	0	0	0	0	0	0	0	1	1	0	0	0	1	0	0	0	0	0
A330093E20Rik	1.54167	0	2	0	1	0	4	0	0	0	4	0	2	1	3	2	0	2	1	4	0	2	0	0	6	0	0	0	1	1	2	5	0	2	1	2	2	1	0	1	1	4	2	3	3	4	0	3	1
A330102I10Rik	0.395833	0	0	0	1	0	0	0	0	0	0	0	1	0	0	0	0	0	1	0	0	0	3	0	0	2	0	0	0	0	0	0	0	2	0	1	1	1	4	1	0	0	0	0	0	0	0	0	0
A3galt2	6.70833	0	7	5	3	1	8	2	3	0	7	19	19	10	13	5	0	9	6	8	8	5	3	13	6	21	1	10	7	4	9	10	8	4	7	6	3	5	4	2	3	5	7	18	2	3	3	12	4
A430005L14Rik	248.271	99	304	341	323	322	338	99	334	104	273	240	256	248	378	249	134	185	107	124	212	244	277	396	440	314	206	229	270	235	211	237	198	227	221	211	202	246	185	183	212	234	162	492	319	321	164	355	193
A430033K04Rik	92.5	42	148	84	95	132	127	42	106	61	128	62	49	82	132	102	55	129	58	60	74	93	88	137	131	95	54	71	63	105	80	127	87	104	75	89	74	100	68	89	74	117	82	223	107	114	49	127	45
A430035B10Rik	42.1458	16	114	28	61	50	43	21	49	33	55	44	31	40	76	42	17	27	20	23	26	51	48	44	47	19	31	53	39	60	40	40	43	43	47	43	24	31	26	45	39	47	25	92	53	63	34	61	16
A430046D13Rik	64.4583	22	86	55	58	60	80	22	63	34	95	134	142	64	63	48	27	72	29	50	42	45	56	104	98	40	32	58	48	75	74	64	41	50	43	57	66	62	64	40	42	97	34	173	66	74	42	115	53
A430078G23Rik	2.58333	0	1	6	0	0	3	0	0	1	3	15	2	4	3	1	1	3	1	1	0	1	0	5	2	30	0	0	0	0	0	2	10	1	1	3	0	1	5	0	0	3	1	2	2	6	0	2	2
A430078I02Rik	4.16667	0	2	5	4	6	0	2	4	0	3	9	2	7	7	2	2	1	2	1	3	6	1	12	9	2	3	3	5	2	5	4	5	4	3	4	3	1	7	5	4	4	8	12	3	4	5	8	2
A430085M09Rik	0.208333	0	0	0	0	0	0	0	3	0	0	3	0	0	0	1	0	0	0	0	0	0	0	0	2	0	0	0	0	0	0	0	0	0	0	0	0	0	0	0	1	0	0	0	0	0	0	0	0
A430088P11Rik	0.833333	0	0	1	0	1	0	0	0	0	3	0	1	2	0	1	0	0	0	0	1	0	0	0	3	11	0	0	0	2	1	0	2	0	0	1	2	1	2	0	2	1	0	1	0	0	0	0	0
A430089I19Rik	0	0	0	0	0	0	0	0	0	0	0	0	0	0	0	0	0	0	0	0	0	0	0	0	0	0	0	0	0	0	0	0	0	0	0	0	0	0	0	0	0	0	0	0	0	0	0	0	0
A430090L17Rik	15.625	4	15	9	17	15	20	6	6	9	35	38	34	14	21	14	6	22	9	10	13	17	13	24	28	20	4	15	18	15	21	21	10	14	8	13	6	18	7	12	12	18	11	33	12	17	7	22	12
A430093F15Rik	2.22917	0	7	0	2	2	0	0	1	0	3	0	5	0	2	2	0	0	1	0	2	2	1	2	6	32	0	1	0	1	1	0	6	3	2	1	1	2	2	0	1	2	0	2	2	2	2	2	3
A430105I19Rik	139.604	57	107	78	154	146	167	70	171	57	171	312	169	153	175	108	70	171	76	105	108	130	134	318	270	250	60	80	86	124	125	133	88	104	92	155	102	156	91	115	106	147	133	352	153	186	76	199	111
A4galt	315.021	101	228	218	281	525	519	175	349	119	393	346	472	356	309	211	101	383	187	194	250	277	274	570	455	369	141	172	184	395	401	334	284	267	203	518	331	385	234	241	227	378	229	785	345	255	178	536	264
A4gnt	139.167	37	240	106	167	175	155	37	223	73	110	51	105	87	209	162	58	132	59	118	108	222	271	155	69	69	130	150	164	167	149	162	115	150	149	174	98	136	112	108	135	206	107	322	155	175	127	186	87
A530006G24Rik	0	0	0	0	0	0	0	0	0	0	0	0	0	0	0	0	0	0	0	0	0	0	0	0	0	0	0	0	0	0	0	0	0	0	0	0	0	0	0	0	0	0	0	0	0	0	0	0	0
A530013C23Rik	0.625	0	0	2	0	4	2	1	1	1	0	0	0	2	0	0	0	3	0	0	0	0	0	2	1	1	0	0	0	0	0	1	1	1	0	0	0	1	0	0	1	0	2	0	0	0	0	1	2
A530016L24Rik	3.5	0	1	1	1	2	0	0	3	0	3	0	2	2	8	3	2	8	3	5	4	4	1	0	3	61	3	0	0	2	1	2	1	1	0	5	1	0	2	4	0	11	2	9	1	1	2	3	0
A530032D15Rik	74.8125	29	71	37	95	51	88	31	78	44	71	56	61	65	104	53	29	69	31	47	45	75	76	114	104	319	50	53	54	87	78	85	170	70	64	84	67	69	52	66	57	85	47	143	71	99	40	92	56
A530046M15Rik	0	0	0	0	0	0	0	0	0	0	0	0	0	0	0	0	0	0	0	0	0	0	0	0	0	0	0	0	0	0	0	0	0	0	0	0	0	0	0	0	0	0	0	0	0	0	0	0	0
A530050N04Rik	0.1875	0	0	0	0	0	0	0	0	0	0	0	0	0	1	0	0	0	0	0	0	0	0	0	0	3	0	0	0	0	0	2	1	0	0	0	0	0	0	0	0	1	0	0	0	1	0	0	0
A530053G22Rik	0.104167	0	0	0	0	0	0	0	0	0	0	0	0	0	0	0	0	2	0	0	0	0	0	0	0	3	0	0	0	0	0	0	0	0	0	0	0	0	0	0	0	0	0	0	0	0	0	0	0
A530058N18Rik	0	0	0	0	0	0	0	0	0	0	0	0	0	0	0	0	0	0	0	0	0	0	0	0	0	0	0	0	0	0	0	0	0	0	0	0	0	0	0	0	0	0	0	0	0	0	0	0	0
A530064D06Rik	1.375	0	0	0	0	2	3	0	0	1	2	1	0	2	0	0	0	0	0	1	0	5	0	6	1	19	0	0	3	2	0	1	1	0	1	0	1	3	2	3	0	2	0	0	2	1	0	0	1
A530065N20Rik	0.333333	0	0	3	0	1	0	0	0	0	0	0	0	0	0	0	0	0	1	1	0	0	1	2	2	1	0	0	0	0	0	0	3	0	1	0	0	0	0	0	0	0	0	0	0	0	0	0	0
A530072M11Rik	7.25	0	9	5	8	9	14	1	8	0	9	11	9	1	6	4	1	9	2	10	10	6	7	13	7	9	6	3	9	6	8	17	7	7	4	15	1	8	3	9	5	10	6	8	8	11	3	15	8
A530088E08Rik	1.1875	0	1	0	0	0	1	0	1	0	0	6	12	0	2	0	1	1	0	0	1	3	0	1	0	7	0	0	0	0	2	0	0	0	0	0	1	0	0	0	0	1	0	6	1	1	0	3	3
A530099J19Rik	5.5	0	0	0	1	4	2	1	0	2	1	8	16	9	2	2	0	3	3	4	1	3	0	14	6	86	0	1	0	1	2	5	11	2	0	9	7	2	4	5	5	5	4	5	6	9	2	5	0
A630001G21Rik	24.1667	6	32	12	10	22	32	6	14	11	24	27	60	18	32	25	8	18	13	12	12	13	22	46	50	169	8	9	7	15	9	24	46	21	7	28	25	26	8	21	12	27	15	40	31	30	8	22	17
A630010A05Rik	0.0833333	0	0	0	0	0	0	0	0	0	0	0	0	0	0	0	0	0	0	0	0	0	0	0	0	0	0	0	0	0	0	0	0	0	0	1	0	0	0	0	0	0	0	0	0	1	1	0	1
A630012P03Rik	0.416667	0	0	0	0	0	0	0	0	0	0	0	0	0	0	0	0	0	0	0	0	0	0	2	0	15	0	0	1	0	0	0	0	0	1	0	0	0	0	0	0	0	0	0	0	0	0	1	0
A630019I02Rik	0.0416667	0	0	0	0	0	0	0	0	0	0	0	0	0	0	0	0	0	0	0	0	0	0	0	0	0	0	0	0	0	0	0	1	0	0	0	0	0	1	0	0	0	0	0	0	0	0	0	0
A630020A06	3.91667	0	0	3	3	5	2	3	7	3	3	3	0	4	12	3	3	4	1	4	2	2	6	3	9	0	5	10	0	3	5	6	2	3	4	4	2	2	4	3	3	6	5	12	2	1	3	8	5
A630023A22Rik	0	0	0	0	0	0	0	0	0	0	0	0	0	0	0	0	0	0	0	0	0	0	0	0	0	0	0	0	0	0	0	0	0	0	0	0	0	0	0	0	0	0	0	0	0	0	0	0	0
A630023P12Rik	0.958333	0	0	0	0	0	0	0	0	0	0	6	0	2	2	1	0	0	0	0	0	0	1	1	0	18	0	0	0	0	1	1	7	1	1	0	0	1	0	0	0	0	0	1	1	1	0	0	0
A630033H20Rik	9.1875	1	9	1	6	15	24	4	5	3	5	5	7	16	1	3	7	14	7	8	3	11	6	21	14	48	3	5	5	9	11	8	10	5	2	10	10	9	6	4	6	9	7	24	24	8	1	11	5
A630066F11Rik	28.75	12	30	32	33	23	41	19	24	22	48	22	30	28	43	21	17	22	13	24	15	32	35	45	36	20	17	26	32	36	31	41	31	27	22	36	24	21	12	30	28	35	17	59	38	39	27	44	13
A630072M18Rik	77.4792	28	111	56	75	68	79	28	78	57	77	118	104	56	123	67	44	108	56	71	56	65	92	134	101	131	47	72	58	86	67	70	75	84	69	84	33	72	79	68	73	113	69	167	79	99	29	79	50
A630073D07Rik	0	0	0	0	0	0	0	0	0	0	0	0	0	0	0	0	0	0	0	0	0	0	0	0	0	0	0	0	0	0	0	0	0	0	0	0	0	0	0	0	0	0	0	0	0	0	0	0	0
A630075F10Rik	5.5625	0	3	1	13	4	11	1	2	4	6	26	10	7	9	5	2	3	0	2	6	2	8	6	8	4	2	6	2	9	9	5	4	3	2	1	3	2	3	5	6	3	8	15	7	5	1	11	4
A630076J17Rik	52.625	1	67	62	41	60	94	22	39	40	73	32	54	39	78	28	15	56	26	32	48	56	85	105	32	1	47	69	75	54	34	71	40	52	71	137	42	58	19	29	33	64	51	85	63	65	18	80	51
A630077J23Rik	1.14583	0	0	0	1	3	0	0	0	0	1	0	0	1	0	4	0	5	2	2	2	0	1	1	4	0	0	2	0	0	3	1	2	1	0	4	0	0	0	1	1	2	2	3	4	0	1	1	0
A630089N07Rik	6.45833	1	7	7	3	2	2	1	7	6	13	8	1	3	9	2	8	14	2	3	2	14	5	9	4	12	5	4	3	9	6	10	5	5	8	6	6	3	4	10	16	9	7	20	13	4	5	3	3
A630095E13Rik	0	0	0	0	0	0	0	0	0	0	0	0	0	0	0	0	0	0	0	0	0	0	0	0	0	0	0	0	0	0	0	0	0	0	0	0	0	0	0	0	0	0	0	0	0	0	0	0	0
A630095N17Rik	2.1875	0	2	3	2	3	3	2	3	0	2	0	0	3	2	2	2	4	1	0	1	0	4	10	1	0	2	3	4	5	2	2	2	1	3	1	2	0	2	3	1	2	1	9	3	4	1	2	0
A730004F24Rik	0	0	0	0	0	0	0	0	0	0	0	0	0	0	0	0	0	0	0	0	0	0	0	0	0	0	0	0	0	0	0	0	0	0	0	0	0	0	0	0	0	0	0	0	0	0	0	0	0
A730006G06Rik	0.0208333	0	0	0	0	0	0	0	0	0	0	0	0	0	0	0	0	0	0	0	0	0	0	0	0	0	0	0	0	0	0	1	0	0	0	0	0	0	0	0	0	0	0	0	0	0	0	0	0
A730008H23Rik	0	0	0	0	0	0	0	0	0	0	0	0	0	0	0	0	0	0	0	0	0	0	0	0	0	0	0	0	0	0	0	0	0	0	0	0	0	0	0	0	0	0	0	0	0	0	0	0	0
A730017C20Rik	2.41667	0	0	1	5	2	2	0	0	0	0	3	1	3	2	1	1	13	2	1	0	2	0	0	6	11	2	0	3	5	2	3	2	1	0	4	1	1	2	4	0	5	4	6	3	3	0	6	2
A730017L22Rik	102.688	40	116	71	98	123	150	40	91	56	135	113	118	105	150	102	42	96	65	77	67	91	111	184	179	137	49	72	84	114	103	136	87	86	60	111	94	97	99	104	99	126	87	245	130	110	60	114	71
A730018C14Rik	0	0	0	0	0	0	0	0	0	0	0	0	0	0	0	0	0	0	0	0	0	0	0	0	0	0	0	0	0	0	0	0	0	0	0	0	0	0	0	0	0	0	0	0	0	0	0	0	0
A730020E08Rik	8.375	1	2	6	9	6	15	1	10	8	6	5	6	8	12	7	2	3	3	9	8	14	11	15	5	6	6	8	10	7	7	14	2	7	9	3	2	14	11	10	11	20	9	28	14	13	3	4	6
A730020M07Rik	29.2292	2	94	53	52	24	23	2	56	26	27	12	17	11	77	27	21	13	9	10	25	46	65	12	13	18	43	65	48	17	15	24	35	22	53	17	12	14	35	30	33	12	9	27	48	47	21	25	11
A730036I17Rik	1.3125	0	3	2	2	0	1	0	0	1	0	2	1	2	1	2	2	3	0	0	1	6	2	2	2	0	1	2	1	1	0	0	3	1	2	0	1	1	1	1	2	1	0	3	2	3	0	1	1
A730043L09Rik	0.0208333	0	0	0	0	0	0	0	0	0	0	0	0	0	0	0	0	0	0	0	0	0	0	0	0	0	0	0	0	0	0	0	0	1	0	0	0	0	0	0	0	0	0	0	0	0	0	0	0
A730046J19Rik	0.0208333	0	0	0	0	0	0	0	0	0	0	0	0	0	0	0	0	0	0	0	0	0	0	0	0	1	0	0	0	0	0	0	0	0	0	0	0	0	0	0	0	0	0	0	0	0	0	0	0
A730056A06Rik	0.416667	0	0	0	0	0	0	0	0	0	1	0	0	0	0	0	0	1	0	0	0	0	2	0	0	0	0	0	1	1	1	0	0	0	0	1	1	1	0	1	3	0	0	3	0	0	0	3	0
A730082K24Rik	0.0208333	0	0	0	0	0	0	0	0	0	0	0	0	0	0	0	0	0	0	0	0	0	0	0	1	0	0	0	0	0	0	0	0	0	0	0	0	0	0	0	0	0	0	0	0	0	0	0	0
A730085K08Rik	0.895833	0	3	2	1	1	0	0	0	0	0	0	3	0	0	1	0	0	1	0	1	0	7	0	0	3	0	0	0	0	0	0	1	2	1	1	0	1	1	1	0	1	4	4	1	0	1	1	0
A730090H04Rik	0.229167	0	0	0	0	0	0	0	0	0	0	0	0	0	0	0	0	2	0	0	0	0	0	0	0	0	0	0	1	0	1	0	0	1	1	0	0	0	0	1	0	0	0	2	0	0	0	0	2
A730090N16Rik	1.875	0	0	5	0	3	4	0	3	0	0	0	6	3	3	3	1	0	1	2	2	0	0	2	6	2	1	0	1	3	0	0	3	4	1	1	0	6	1	1	0	0	0	9	2	2	0	6	2
A830009L08Rik	1.60417	0	6	0	0	0	3	2	1	2	1	3	9	1	2	1	1	0	1	0	1	2	0	6	4	0	2	1	0	2	2	3	0	1	2	2	1	1	2	1	2	1	0	2	0	2	0	1	0
A830010M20Rik	77.6667	33	147	86	111	83	104	33	74	33	89	60	57	55	136	72	40	65	34	53	56	98	93	132	102	77	73	86	87	72	85	78	65	57	77	76	58	45	61	91	66	104	60	164	98	98	38	120	39
A830011K09Rik	0	0	0	0	0	0	0	0	0	0	0	0	0	0	0	0	0	0	0	0	0	0	0	0	0	0	0	0	0	0	0	0	0	0	0	0	0	0	0	0	0	0	0	0	0	0	0	0	0
A830018L16Rik	0.5	0	0	0	0	0	3	0	0	0	0	0	0	1	1	0	0	1	0	1	0	1	1	2	3	1	0	0	0	0	0	0	2	1	1	0	0	0	0	1	0	1	0	1	0	1	1	0	0
A830019L24Rik	0.0416667	0	0	0	0	0	0	0	0	0	0	0	0	0	0	0	0	0	0	0	0	0	0	0	0	0	0	0	0	0	0	0	0	0	0	0	0	0	0	0	0	0	0	0	0	2	0	0	0
A830052D11Rik	6.97917	0	5	7	11	19	8	3	2	2	14	4	13	10	14	8	3	13	5	3	3	5	6	9	14	0	3	6	1	9	14	3	0	12	7	2	4	10	9	2	5	11	1	11	7	5	6	11	7
A830080D01Rik	97.4792	34	138	64	96	79	128	34	120	50	94	93	96	63	139	103	44	111	37	86	49	123	100	176	146	120	63	79	85	117	96	127	96	96	89	110	94	85	101	81	103	145	87	216	103	106	50	146	76
A830082K12Rik	5.10417	0	0	2	12	5	6	4	2	3	6	8	11	5	4	5	2	3	3	2	2	11	4	13	9	4	4	5	6	2	9	6	0	1	3	3	4	4	3	3	4	6	6	8	10	8	3	3	13
A830082N09Rik	16.9792	4	21	10	10	21	17	7	25	8	25	27	18	12	30	13	9	23	13	21	13	23	8	40	17	16	10	17	8	26	11	20	7	9	15	19	19	14	12	16	10	35	16	39	22	14	7	29	9
A930001A20Rik	1.1875	0	0	2	0	1	1	0	0	0	1	0	1	1	2	0	0	0	0	2	0	5	1	2	3	0	0	0	1	1	1	3	0	2	0	4	2	1	1	2	2	2	0	7	1	3	0	2	0
A930001C03Rik	18.3542	5	16	20	8	26	30	11	20	13	26	34	38	25	19	22	13	9	5	9	19	13	11	26	14	16	8	9	9	12	17	15	19	17	11	14	15	16	17	18	13	25	15	46	32	28	15	33	15
A930002C04Rik	0.166667	0	0	0	0	0	0	0	3	0	0	0	2	0	0	0	0	0	0	0	0	0	0	0	0	0	0	0	0	1	0	0	0	0	0	0	0	0	0	0	0	0	0	2	0	0	0	0	0
A930003A15Rik	0	0	0	0	0	0	0	0	0	0	0	0	0	0	0	0	0	0	0	0	0	0	0	0	0	0	0	0	0	0	0	0	0	0	0	0	0	0	0	0	0	0	0	0	0	0	0	0	0
A930003O13Rik	0.791667	0	0	0	1	0	0	0	0	0	0	4	0	1	1	1	1	2	0	2	3	3	0	2	0	0	0	0	1	1	1	0	0	0	0	0	0	0	1	2	1	2	0	4	2	1	0	0	1
A930004D18Rik	40.7083	12	55	33	42	52	53	24	50	14	54	42	64	34	48	33	16	30	12	20	45	42	50	54	37	47	28	35	34	48	50	52	37	45	47	46	47	30	35	41	35	46	27	86	47	44	24	72	19
A930005H10Rik	68.9583	14	103	53	98	81	89	24	88	33	100	126	83	67	98	83	14	76	44	39	49	41	83	100	127	62	38	56	58	53	72	71	53	69	39	67	57	80	47	65	49	54	51	158	72	97	38	109	43
A930006I01Rik	0	0	0	0	0	0	0	0	0	0	0	0	0	0	0	0	0	0	0	0	0	0	0	0	0	0	0	0	0	0	0	0	0	0	0	0	0	0	0	0	0	0	0	0	0	0	0	0	0
A930006K02Rik	7.9375	0	4	1	21	10	12	0	9	3	12	11	13	7	21	5	3	11	5	7	9	3	5	14	6	20	7	3	11	12	9	5	6	8	2	10	4	3	3	4	3	11	5	17	8	15	5	11	5
A930007I19Rik	7.375	2	6	9	15	11	7	4	16	6	7	7	4	3	6	8	5	6	4	3	4	4	14	20	16	5	6	7	2	8	12	8	11	8	4	5	11	4	4	8	9	11	5	14	5	5	8	3	2
A930009A15Rik	0.0833333	0	0	0	0	0	2	0	0	0	0	0	0	0	2	0	0	0	0	0	0	0	0	0	0	0	0	0	0	0	0	0	0	0	0	0	0	0	0	0	0	0	0	0	0	0	0	0	0
A930011G23Rik	0.8125	0	0	1	3	1	0	0	2	0	1	2	0	1	2	0	0	3	0	0	1	0	0	0	2	1	1	2	0	0	1	0	0	3	0	4	0	1	1	0	0	0	0	1	1	2	1	1	0
A930012L18Rik	4.8125	0	0	2	4	4	13	3	8	1	7	1	5	7	5	3	5	6	6	2	6	1	2	8	11	7	3	4	3	3	6	8	4	2	3	9	5	3	4	3	1	8	5	10	5	6	2	8	4
A930013F10Rik	54.9583	18	64	44	36	45	71	28	40	21	73	148	79	57	52	38	18	54	26	41	31	60	63	98	118	69	34	47	56	63	47	64	54	54	34	61	43	37	33	31	29	89	37	133	59	54	32	81	53
A930015D03Rik	31.6458	8	35	23	32	49	47	12	25	8	25	53	41	31	52	23	20	35	13	20	18	20	42	60	35	51	18	21	24	42	27	35	37	38	27	33	19	27	30	30	36	33	13	81	34	43	17	38	25
A930016O22Rik	1.83333	0	3	2	0	0	2	0	0	0	0	6	3	2	2	1	1	2	2	8	1	2	3	2	6	2	0	3	0	3	2	2	1	0	1	0	1	2	0	0	1	2	2	5	1	4	3	3	1
A930017M01Rik	4.72917	0	0	2	7	6	3	1	6	0	4	11	4	1	10	2	0	6	4	1	4	2	2	31	11	2	1	2	3	3	1	3	8	7	4	4	5	3	4	1	7	7	3	10	9	3	1	6	3
A930018P22Rik	0.4375	0	0	1	0	1	0	2	0	0	0	4	0	1	0	0	0	0	0	0	0	0	0	0	1	0	0	0	0	1	0	0	0	0	0	2	0	0	3	0	0	2	0	1	0	0	0	0	2
A930019D19Rik	0.645833	0	1	0	2	0	1	1	1	0	2	2	4	0	0	0	0	1	0	0	0	2	0	0	1	0	0	0	0	1	0	0	0	1	0	1	1	0	0	1	1	0	2	2	1	0	0	0	0
A930024E05Rik	9.1875	1	14	4	6	11	7	4	10	6	18	22	12	6	11	8	5	9	7	4	9	6	8	22	8	33	8	2	5	11	7	8	8	9	1	7	11	8	3	10	9	9	6	24	7	10	3	16	5
A930031H19Rik	0.4375	0	0	1	0	0	1	0	1	0	1	0	1	0	0	1	0	0	0	1	0	2	2	0	0	0	1	0	1	0	0	1	1	0	0	0	0	0	1	1	1	1	0	1	0	1	0	0	0
A930041C12Rik	1.6875	0	2	0	1	6	1	0	1	1	2	5	2	0	1	3	2	0	2	0	3	0	5	5	3	2	1	1	6	2	0	4	2	1	0	1	1	0	1	0	0	1	0	1	2	2	2	3	2
AA387883	0.0625	0	0	0	0	0	0	0	0	0	0	0	0	0	0	0	0	0	0	0	0	0	0	0	0	3	0	0	0	0	0	0	0	0	0	0	0	0	0	0	0	0	0	0	0	0	0	0	0
AA388235	40.7083	14	44	19	33	51	69	17	80	25	46	20	38	39	45	38	14	56	28	34	23	31	39	62	67	16	30	27	35	55	44	62	36	33	18	35	42	35	22	31	39	58	37	137	53	48	29	67	23
AA413626	1.72917	0	4	0	2	1	1	1	0	0	5	2	5	3	2	1	0	1	1	0	2	0	4	3	4	0	0	2	1	3	0	1	1	1	1	3	2	1	0	1	0	1	1	5	1	8	5	1	2
AA414768	13.7083	1	11	8	9	7	19	1	15	8	10	32	20	20	23	8	8	14	5	9	9	10	17	16	14	37	8	10	13	8	7	9	23	6	8	19	12	14	10	10	12	23	14	30	22	22	5	17	12
AA415398	77.4792	21	97	71	90	82	103	21	87	55	80	73	85	66	112	86	54	89	44	43	37	60	118	97	98	50	57	77	75	76	83	81	67	86	66	83	52	77	57	74	82	117	65	162	93	92	66	140	49
AA465934	8.4375	0	14	5	7	8	13	5	17	0	12	9	13	13	10	9	6	5	1	10	5	7	5	21	11	10	8	6	4	5	8	12	7	10	6	4	9	6	4	4	6	8	3	18	15	10	4	16	9
AA467197	4.83333	0	0	0	0	0	1	0	4	2	4	13	1	1	4	5	0	8	1	7	3	4	1	9	6	65	0	1	0	5	0	0	3	1	4	6	6	6	2	4	1	5	11	14	3	13	1	1	2
AA474331	135.417	41	108	140	148	125	153	60	170	83	95	51	41	131	208	150	94	127	50	80	95	147	169	160	187	60	110	150	178	163	150	189	132	221	178	162	142	151	122	164	162	130	85	353	144	167	97	180	65
AA536875	2.08333	0	3	8	9	0	0	0	0	0	0	0	0	0	2	3	2	0	0	0	3	3	9	0	0	0	13	22	15	0	0	0	0	0	7	0	0	0	0	0	0	0	0	0	0	1	0	0	0
AA543186	23.6667	3	21	36	33	25	28	9	27	7	34	23	17	35	30	33	3	12	15	18	17	28	33	35	24	17	22	19	17	19	16	43	16	32	14	27	16	23	14	18	18	30	19	52	35	31	18	44	17
AA543401	0	0	0	0	0	0	0	0	0	0	0	0	0	0	0	0	0	0	0	0	0	0	0	0	0	0	0	0	0	0	0	0	0	0	0	0	0	0	0	0	0	0	0	0	0	0	0	0	0
AA545190	0	0	0	0	0	0	0	0	0	0	0	0	0	0	0	0	0	0	0	0	0	0	0	0	0	0	0	0	0	0	0	0	0	0	0	0	0	0	0	0	0	0	0	0	0	0	0	0	0
AA619741	0	0	0	0	0	0	0	0	0	0	0	0	0	0	0	0	0	0	0	0	0	0	0	0	0	0	0	0	0	0	0	0	0	0	0	0	0	0	0	0	0	0	0	0	0	0	0	0	0
AA792892	1.66667	0	1	0	1	1	0	0	4	2	4	0	2	2	7	4	1	0	2	0	0	0	6	3	3	1	1	1	3	0	0	1	0	4	0	3	4	0	2	1	0	3	1	4	0	5	0	2	1
AA986860	212.312	88	207	142	179	353	270	98	217	88	241	176	176	183	347	201	93	290	151	164	155	169	287	434	311	241	113	150	150	263	286	229	210	175	166	276	150	187	140	171	155	314	225	544	236	230	107	312	141
Aaas	206.979	84	239	171	233	234	302	106	259	121	197	281	186	176	285	206	84	200	106	119	150	199	235	325	332	325	154	190	188	211	206	209	216	221	220	194	166	203	138	145	195	203	169	395	250	267	128	319	137
Aacs	1564.79	424	2409	2413	2660	1691	1743	453	2926	952	1220	618	738	596	3783	1458	805	892	424	532	2394	2634	2871	1280	736	763	2092	2439	4128	916	1137	1503	1362	2265	2079	1357	1030	910	1198	1216	1268	1460	1066	2704	1911	2537	1006	1179	756
Aadac	1701.27	643	1914	1259	1849	1926	2256	829	1834	941	2041	1264	1381	1759	2134	1626	791	1702	845	1148	1076	1568	1732	2843	3091	643	1150	1601	1677	2563	2258	2271	1265	1631	1475	1796	2078	2007	1320	1417	1629	2080	1354	4013	1785	1952	897	2625	1171
Aadacl2	0	0	0	0	0	0	0	0	0	0	0	0	0	0	0	0	0	0	0	0	0	0	0	0	0	0	0	0	0	0	0	0	0	0	0	0	0	0	0	0	0	0	0	0	0	0	0	0	0
Aadacl3	0	0	0	0	0	0	0	0	0	0	0	0	0	0	0	0	0	0	0	0	0	0	0	0	0	0	0	0	0	0	0	0	0	0	0	0	0	0	0	0	0	0	0	0	0	0	0	0	0
Aadat	9354.79	273	5806	3233	5312	18643	19849	6972	2335	1436	12490	10295	16085	12637	4218	2270	1436	17121	10092	11459	1932	2886	3569	23885	12282	273	2797	3549	4253	17546	17192	19874	1560	1902	3053	22496	10515	15510	1734	2059	2581	17707	12273	34279	2309	2624	1679	23379	14502
Aaed1	283.542	124	373	222	327	300	366	126	394	170	236	124	150	267	445	328	164	325	160	194	178	256	374	364	378	185	210	282	294	276	342	351	274	322	297	319	274	323	263	284	291	400	210	604	350	380	198	342	180
Aagab	576.125	246	550	528	676	795	762	281	710	305	621	496	539	566	857	585	319	543	246	334	366	535	635	994	935	568	352	492	607	668	689	648	507	628	476	589	524	612	440	472	486	690	424	1218	693	768	355	811	384
Aak1	880.167	389	923	755	986	854	1092	389	1043	530	897	507	518	814	1504	964	519	1093	491	625	578	1064	957	1523	1399	900	561	706	815	967	998	1061	879	1020	675	1011	708	869	778	844	975	1175	729	1988	978	1132	467	1063	477
Aamdc	348.229	130	371	344	420	476	517	130	447	165	452	324	388	376	494	311	147	291	151	197	247	283	421	648	559	234	259	318	366	465	363	392	263	350	326	346	297	322	250	281	296	335	207	703	480	455	236	534	221
Aamp	2253.48	920	2415	2703	3284	3131	3095	921	3100	920	2361	1977	2150	2389	3331	2155	1161	1831	931	1146	1905	2117	2735	3666	3798	1863	1723	2193	2493	2546	2547	2193	1820	2181	1944	2123	1889	2174	1709	1806	1954	2240	1388	4701	2674	2894	1272	3347	1637
Aanat	0.625	0	0	0	0	2	0	1	4	0	0	0	1	2	0	0	0	0	0	0	0	4	1	2	2	0	0	0	0	1	1	0	0	4	0	0	1	0	0	0	1	1	0	0	0	1	0	0	1
Aar2	343.792	153	360	270	380	468	402	163	452	175	280	154	227	302	556	357	168	392	153	220	282	336	401	579	573	359	251	280	381	427	407	379	330	405	311	335	300	363	278	272	327	431	263	813	451	406	217	464	218
Aard	7.02083	0	0	0	0	3	1	0	2	2	5	12	11	6	1	0	0	5	2	0	3	4	1	15	7	135	2	3	1	4	4	1	8	9	4	10	7	6	4	1	4	6	3	11	11	8	3	6	3
Aars	1471.71	617	2117	1963	2316	1888	1992	617	1662	774	1301	851	1031	1344	2262	1448	745	1335	652	832	1383	1473	1706	2426	1758	1413	1208	1475	1772	1619	1595	1482	1285	1556	1481	1583	1243	1438	1180	1490	1463	1447	966	2876	1758	2055	814	1776	964
Aars2	341.208	122	335	425	473	502	458	160	471	122	344	337	367	353	474	322	185	324	137	147	347	332	405	558	502	283	258	274	359	375	413	311	277	347	348	348	309	330	232	312	307	344	185	662	406	406	205	528	252
Aarsd1	429.125	184	509	514	594	592	582	184	510	226	502	519	462	448	646	347	188	297	187	224	342	371	509	763	674	391	293	391	446	519	450	435	328	370	363	452	359	400	304	336	383	414	265	950	512	575	269	604	311
Aasdh	181.021	77	220	174	173	216	231	89	198	117	205	277	142	162	310	163	97	228	100	132	143	138	226	328	284	97	116	155	169	191	187	195	174	165	141	178	134	139	130	163	169	274	133	441	234	224	135	215	100
Aasdhppt	361.5	141	419	330	507	327	499	149	449	178	318	260	215	309	519	360	169	275	141	176	279	399	441	531	460	252	279	373	465	457	436	459	359	373	379	383	339	359	292	318	334	441	245	845	497	535	229	510	242
Aass	6647.96	1438	11472	7600	10586	5022	6184	2084	10070	4887	5640	2445	3050	5279	12930	8183	4357	4393	2487	3272	5521	9058	9012	6518	8426	1438	6829	8549	10263	7629	6898	6148	6789	9268	7995	5151	5277	5923	7192	7250	8353	6607	3379	11542	9178	10364	4908	7535	3043
Aatf	247.396	91	287	209	308	299	333	117	378	104	277	208	241	258	378	240	106	206	91	125	174	202	299	404	480	289	193	219	264	314	298	277	200	235	230	177	211	210	214	205	224	289	188	541	317	291	139	344	135
Aatk	68.75	15	58	43	52	103	81	15	118	37	66	102	115	77	100	46	40	80	55	52	54	84	89	172	131	70	26	37	16	65	76	72	29	47	30	86	48	94	65	60	47	59	35	168	72	88	44	91	54
AB124611	23.4583	0	9	6	8	25	21	0	19	12	13	28	34	36	16	8	10	14	8	6	23	15	25	44	27	297	7	15	11	11	18	13	49	15	8	27	20	18	14	20	13	16	15	25	20	24	6	24	16
Abat	5308.31	1370	6866	4941	6595	6068	6992	2489	6546	3357	5157	1557	2625	5001	8553	5722	2863	5973	2979	4006	3713	5489	5857	7676	7516	1370	3780	4742	5722	6587	6636	6572	4629	6191	5005	6021	5367	5934	5054	5544	5872	7082	4153	12103	6077	6168	2668	7447	2751
Abca1	493	187	660	444	573	574	764	196	406	275	522	425	403	356	974	400	230	523	286	273	314	403	381	621	691	980	268	472	534	691	643	681	435	509	230	493	430	439	410	467	555	659	444	1264	591	518	212	632	226
Abca12	0.0416667	0	0	0	0	0	0	0	0	0	0	0	0	0	0	0	0	0	0	0	0	0	0	0	0	0	0	0	0	0	0	0	0	0	0	0	0	0	0	0	0	0	2	0	0	0	0	0	0
Abca13	2079.5	31	1992	1451	1832	2101	1975	724	2175	1263	1917	644	930	1998	4257	2699	1228	2577	1431	2212	1341	2621	2091	3974	3963	31	1100	1284	1548	2053	2163	1951	2450	2352	1849	2307	1854	2297	1881	2410	2210	4141	2079	6210	2329	2366	982	2912	824
Abca14	3.91667	0	3	0	5	6	6	2	1	2	11	1	6	1	8	4	0	4	2	1	3	5	2	7	12	7	2	4	0	8	1	5	3	1	0	4	1	10	1	2	2	9	2	11	3	13	2	1	4
Abca15	0	0	0	0	0	0	0	0	0	0	0	0	0	0	0	0	0	0	0	0	0	0	0	0	0	0	0	0	0	0	0	0	0	0	0	0	0	0	0	0	0	0	0	0	0	0	0	0	0
Abca16	0.145833	0	0	0	0	0	0	0	0	0	0	0	1	0	0	0	0	1	1	0	0	0	0	0	0	0	0	0	0	0	0	0	1	0	0	0	0	0	0	0	0	1	0	1	0	0	0	0	0
Abca17	184.875	79	228	230	224	236	176	87	249	92	111	102	88	179	311	206	123	158	79	120	151	145	243	273	261	86	126	164	225	185	244	215	167	308	244	227	161	198	197	170	206	187	120	339	194	259	101	235	113
Abca2	1475.98	735	1525	1697	1635	2086	1774	763	1659	858	1522	1353	1007	1044	2524	1633	828	2041	861	1167	1226	1401	1727	2725	2357	983	922	1164	1351	1337	1569	1566	1526	1730	1232	2159	951	1275	1128	1280	1303	2038	1228	3351	1431	1928	735	1587	918
Abca3	6116.71	1302	7437	7915	8704	7757	6050	2455	9034	4134	4217	1302	1439	5012	11787	7751	4108	6774	2997	3978	4942	6414	7885	8199	7549	2522	5112	6521	7125	5645	7076	6822	6214	11044	7725	7310	5389	5781	6080	7148	7176	6438	3784	11485	5984	8136	3367	5923	3039
Abca4	164.229	42	174	137	164	263	245	78	211	75	170	82	91	115	235	183	82	272	111	174	106	125	199	332	212	42	115	153	138	188	195	203	154	177	83	209	110	127	114	149	149	303	195	494	157	150	87	213	90
Abca5	274.188	112	273	151	261	265	321	112	310	134	289	175	191	226	407	232	125	322	173	207	152	321	276	457	428	125	121	210	212	281	323	321	289	314	198	280	297	279	264	352	300	456	244	728	387	400	194	432	174
Abca6	8.41667	1	2	1	11	9	5	3	12	3	6	5	5	3	10	7	6	20	13	17	9	14	17	13	8	9	6	5	6	7	14	10	5	11	1	10	5	5	4	10	5	9	7	38	10	12	1	8	6
Abca7	408.271	124	299	379	408	566	494	165	480	124	506	589	458	374	570	375	225	475	246	286	342	383	333	895	653	597	192	249	230	365	502	421	412	415	277	636	320	398	276	357	381	556	346	1012	398	507	227	421	285
Abca8a	219.062	63	178	192	215	308	360	98	253	113	253	300	263	234	375	182	122	490	172	227	143	167	205	354	236	261	75	120	66	212	241	333	107	140	63	258	186	270	202	282	221	95	186	607	282	271	79	257	119
Abca8b	33.0208	11	28	28	20	47	63	18	34	18	32	32	37	53	34	32	18	94	28	37	26	24	34	53	41	53	13	12	15	32	38	44	12	18	11	42	21	30	24	38	33	28	34	97	36	42	11	26	21
Abca9	149.646	49	100	111	149	196	198	54	136	68	140	158	162	126	304	151	84	288	111	150	128	188	176	299	194	315	49	76	51	113	142	172	91	95	54	190	128	135	151	188	170	111	137	391	165	218	61	156	91
Abcb10	552.542	253	586	521	735	751	744	273	690	274	473	329	339	449	912	562	304	509	253	333	467	568	654	885	734	399	446	522	643	632	675	635	499	624	551	588	481	560	513	513	615	649	385	1207	661	761	291	666	343
Abcb11	1.1875	0	0	0	2	1	0	0	0	1	2	0	0	2	0	0	0	0	0	0	0	13	8	7	1	0	0	1	0	0	0	0	0	0	0	0	7	0	1	0	0	1	0	0	0	1	0	0	0
Abcb1a	320.354	96	133	118	115	401	366	109	454	138	381	229	235	497	321	256	132	391	208	226	153	296	231	444	643	318	96	96	101	438	439	456	376	475	138	374	530	417	339	342	354	549	344	957	307	194	234	631	239
Abcb1b	515.958	101	166	147	128	581	529	164	577	239	761	453	482	783	470	394	201	646	377	365	216	417	320	623	1112	337	113	127	101	800	736	693	575	668	232	771	964	799	517	567	542	951	532	1647	538	309	422	1129	291
Abcb4	30.2083	8	22	15	12	41	45	11	56	10	38	21	36	37	36	23	15	27	10	20	18	32	23	47	41	31	9	11	8	44	36	35	38	32	12	31	34	33	23	43	37	58	33	75	37	15	28	68	21
Abcb5	0.0208333	0	0	0	0	0	0	0	0	0	0	0	0	0	0	0	0	0	0	0	0	0	0	0	0	0	0	0	0	0	0	0	0	0	0	0	1	0	0	0	0	0	0	0	0	0	0	0	0
Abcb6	651.708	265	938	799	933	969	916	301	900	296	541	339	376	526	1086	653	391	555	265	347	558	587	901	864	784	399	587	741	873	838	780	714	564	800	742	595	531	642	558	571	649	650	368	1192	714	855	482	839	399
Abcb7	724.562	279	1119	637	958	590	785	335	722	434	827	279	428	589	1231	833	417	705	346	504	434	1069	936	1010	905	431	565	754	863	743	748	882	828	879	742	741	541	564	752	808	903	907	506	1469	910	1075	461	823	407
Abcb8	825.979	351	902	985	1065	1148	1055	351	1121	413	667	564	624	746	1335	845	430	796	388	484	785	807	1118	1284	1165	519	663	762	1053	903	930	930	680	925	786	875	717	833	683	698	671	881	542	1769	997	1100	487	1079	605
Abcb9	151.854	66	139	152	168	247	282	73	156	66	123	153	124	159	211	128	69	153	69	118	149	124	165	315	232	147	91	124	143	177	189	152	110	130	117	190	151	172	111	107	100	187	113	302	161	177	91	251	114
Abcc1	420.354	152	376	288	371	644	569	237	408	202	450	335	354	346	595	446	195	580	260	317	289	373	383	826	626	551	193	241	243	468	529	530	434	342	272	647	311	356	367	376	388	755	442	1147	453	511	186	545	268
Abcc10	429.958	188	384	415	468	623	631	196	560	227	467	872	578	450	584	362	188	383	199	278	297	354	454	736	841	326	246	316	359	468	471	445	330	413	345	389	338	402	290	322	315	538	254	1044	470	477	265	647	322
Abcc12	0.3125	0	0	0	0	0	1	0	4	0	0	0	0	1	2	0	0	0	1	0	0	0	0	0	0	1	0	0	0	0	0	0	0	1	0	0	1	0	0	0	0	0	0	0	0	0	0	2	1
Abcc2	3637.52	1186	5476	3973	5069	3033	3176	1196	5109	2724	3258	1441	1186	2725	6571	5214	2507	3086	1350	1829	2997	5220	4896	3687	4917	2023	2744	4055	4023	3427	4430	3609	4472	5638	3943	3246	3254	2594	4623	6659	5225	3895	2101	6061	4102	4653	1946	4034	1525
Abcc3	921.562	9	30	41	33	2831	3122	889	87	23	1080	959	1130	970	87	78	25	2443	1234	1320	80	60	62	3014	893	868	9	31	14	1509	1484	2030	115	77	44	3244	888	1596	47	71	50	1820	1507	3884	87	109	61	1910	1551
Abcc4	2147.1	274	553	409	612	2605	2445	958	4175	785	1869	791	917	3053	1237	2266	1082	2502	1269	1193	912	1348	836	2401	4664	1937	274	328	370	3888	4620	3620	3472	5661	978	1850	3463	2074	2960	3251	2434	3999	1774	6490	2336	1091	1353	3358	1322
Abcc5	647.875	243	636	517	600	724	755	243	696	350	837	1022	782	566	893	664	315	685	379	450	507	713	664	1000	1122	776	314	428	461	609	692	738	724	747	449	655	471	506	572	706	656	840	575	1673	747	861	362	684	382
Abcc6	278.229	67	281	290	277	339	227	101	414	130	386	444	282	280	457	304	176	226	118	174	243	287	295	473	667	67	167	222	247	256	305	277	239	333	209	212	244	276	231	244	253	302	196	648	337	375	151	374	168
Abcc8	6.77083	0	9	4	3	12	2	2	13	6	0	25	3	6	8	10	3	9	11	6	6	5	12	9	1	31	4	2	3	5	13	5	12	4	2	7	2	1	6	9	1	9	4	17	1	8	7	5	1
Abcc9	226.688	76	278	159	256	201	178	76	313	158	228	199	262	173	462	249	128	306	132	182	164	311	293	212	237	139	134	215	166	166	242	248	227	250	165	214	140	190	298	268	335	235	166	542	421	344	149	237	127
Abcd1	249.75	101	300	235	295	336	282	103	346	101	173	135	164	244	438	265	107	260	143	174	172	191	366	336	342	533	174	231	241	268	289	280	255	306	226	257	238	289	237	210	236	302	141	547	248	301	129	280	135
Abcd2	8.1875	2	3	4	6	7	2	3	5	2	2	4	6	8	30	5	2	14	8	11	7	8	6	14	7	68	2	3	2	8	8	3	7	4	4	11	4	12	8	3	3	15	6	19	14	5	3	11	4
Abcd3	5126.42	1565	7859	4753	7366	5468	6236	2129	6114	2837	4144	1565	2244	4580	7878	5601	2854	4449	2521	3706	3421	5953	6049	6349	6850	2466	4541	5942	6557	6242	5682	5493	4711	5441	5316	7365	4182	5537	4744	6039	5827	5877	3306	10183	5638	6839	3419	6957	3938
Abcd4	490.458	203	551	521	532	720	799	259	651	213	524	685	487	503	628	354	224	453	203	260	388	394	478	786	862	276	306	407	471	662	744	613	381	500	337	424	411	512	342	377	393	605	295	1093	659	633	279	721	317
Abce1	1139.5	514	2033	1108	1665	1058	1510	514	1189	648	1057	600	777	811	1837	1254	623	1046	517	625	784	1318	1376	1719	1422	1104	966	1194	1354	1240	1241	1333	1104	1273	1211	1163	877	1017	1027	1212	1302	1295	847	2250	1291	1694	725	1225	698
Abcf1	1302.75	606	1617	1395	1775	1618	1870	606	1615	685	1383	1418	1147	1330	1970	1236	635	1208	649	855	1024	1331	1640	2350	2040	1804	928	1143	1404	1436	1389	1355	1116	1302	1132	1310	1000	1278	939	1059	1107	1278	868	2494	1311	1571	734	1564	809
Abcf2	635.479	294	778	658	756	776	769	294	771	350	479	344	342	545	1050	666	310	600	323	409	523	619	739	1110	902	641	509	612	712	719	706	722	601	662	662	701	624	655	560	635	710	673	515	1301	719	887	393	750	376
Abcf3	681.688	302	767	587	760	929	966	302	940	323	693	657	572	649	1032	635	361	660	347	395	506	624	820	1253	1089	697	426	572	659	777	749	786	579	710	579	640	607	635	583	626	672	775	502	1437	766	812	443	913	481
Abcg1	196.188	43	117	130	184	259	306	71	131	58	159	184	203	90	425	225	109	207	105	133	258	177	158	383	209	673	93	142	124	191	260	218	263	117	68	215	130	122	175	172	258	317	184	571	199	262	43	159	102
Abcg2	4996.92	1936	7676	4821	7034	5187	6446	2172	6557	3066	4619	1936	2476	4106	8105	5867	2854	4272	2057	2620	3338	6001	6003	6621	6587	2057	4231	5885	6303	6341	5528	6130	4381	6324	5384	4601	4605	4539	5093	5341	5862	4913	3113	9253	6632	7279	2983	6428	3194
Abcg3	11.6667	1	11	7	5	10	10	1	9	1	8	21	20	6	16	9	12	6	9	6	15	6	16	22	11	67	5	7	11	6	2	5	30	3	7	9	24	8	6	11	8	11	11	22	10	20	9	10	10
Abcg4	4.60417	0	3	2	0	4	4	1	7	4	7	26	7	2	6	4	2	2	3	4	4	0	5	6	9	12	1	2	1	5	6	5	1	1	0	2	4	2	4	6	0	9	4	5	7	3	4	14	4
Abcg5	3.02083	0	7	1	0	4	6	2	4	0	12	1	0	4	1	1	0	2	0	1	1	0	2	8	4	0	0	2	2	5	8	8	0	2	1	0	9	1	5	3	1	7	1	8	3	2	0	7	4
Abcg8	4.33333	0	0	1	6	1	2	0	7	0	9	11	8	2	2	0	0	6	2	2	3	0	8	6	11	0	1	3	1	5	7	6	0	4	2	10	4	10	3	0	0	4	4	20	5	1	3	8	11
Abhd1	6.0625	1	6	7	7	7	12	1	7	4	5	10	10	2	19	3	1	7	2	1	5	7	6	5	12	2	3	9	2	3	4	3	5	10	4	11	2	6	6	8	4	4	5	13	6	9	3	13	6
Abhd10	153.896	71	191	136	187	163	209	75	173	85	195	149	146	148	239	175	79	155	71	108	116	174	179	245	254	113	110	127	119	206	195	173	150	135	135	169	128	121	126	147	115	151	111	323	230	191	92	188	91
Abhd11	606.938	277	683	724	784	870	786	286	753	305	624	788	713	597	979	521	277	501	280	347	492	563	710	978	1029	527	427	559	641	678	641	538	464	557	566	614	528	603	420	388	473	622	382	1249	664	727	363	915	558
Abhd11os	33.125	11	46	51	60	54	39	18	39	11	43	68	36	26	27	17	19	21	17	18	18	39	49	56	66	38	23	37	40	35	27	38	15	30	33	20	23	24	26	23	21	42	14	51	37	41	17	44	27
Abhd12	655.562	316	677	512	583	946	980	329	730	324	594	377	556	665	1033	564	333	681	390	461	458	522	738	1097	948	1162	418	523	614	750	735	769	547	598	565	911	635	720	458	506	566	887	518	1424	704	826	316	909	512
Abhd12b	0	0	0	0	0	0	0	0	0	0	0	0	0	0	0	0	0	0	0	0	0	0	0	0	0	0	0	0	0	0	0	0	0	0	0	0	0	0	0	0	0	0	0	0	0	0	0	0	0
Abhd13	430.5	190	492	385	501	479	634	190	444	205	397	268	264	325	677	463	245	431	227	300	288	497	516	706	580	394	307	430	418	497	441	500	425	455	348	470	367	455	345	394	393	541	393	1051	520	595	289	584	279
Abhd14a	463.312	207	671	496	591	628	672	215	544	285	577	532	531	546	634	489	231	417	207	274	339	328	539	801	879	276	336	419	472	586	495	523	334	454	371	372	384	432	347	340	372	490	311	923	511	552	233	646	306
Abhd14b	3851.15	1340	5172	4150	5146	4666	5032	1920	4960	2178	4558	3569	4218	3491	6780	3648	2009	3654	1747	2127	3091	3956	5336	5790	5414	1340	3007	3882	4393	4214	4263	4013	3084	3603	3761	3583	3061	3615	2725	2818	3173	4121	2630	7862	4827	5347	2449	5377	2702
Abhd15	41.9583	11	45	44	49	44	30	11	27	19	22	27	19	39	61	51	20	40	20	28	42	30	36	83	61	158	28	45	44	41	49	42	54	39	40	49	36	38	26	65	53	51	36	87	38	48	16	42	24
Abhd16a	1023	452	941	1131	1189	1556	1449	461	1337	452	1001	1008	1006	1154	1477	967	455	931	505	590	877	864	1133	1842	1704	902	573	771	868	1243	1265	1083	864	984	791	1203	995	1135	763	740	864	1153	738	2272	1175	1241	584	1425	785
Abhd16b	0.895833	0	0	1	1	0	4	1	1	0	1	0	0	1	0	0	0	1	0	0	0	2	3	0	0	4	0	0	0	1	1	2	3	2	4	1	0	1	3	0	0	0	2	0	0	2	0	1	0
Abhd17a	1031.38	428	900	1393	1468	1720	1318	431	1350	469	985	749	1008	1078	1673	1008	523	877	428	577	1225	850	1432	1738	1652	1018	789	975	1135	1107	1167	974	855	1016	922	1077	909	1031	732	779	878	977	579	1998	1114	1248	573	1432	735
Abhd17b	457.771	171	648	414	629	515	626	171	453	221	401	378	333	362	652	432	190	422	243	282	269	503	483	655	602	380	311	464	510	510	473	568	425	465	508	593	447	514	349	408	523	566	341	1086	490	630	311	597	360
Abhd17c	2104.69	981	2406	1766	2149	2946	3165	1074	2826	1253	2061	1165	1537	2219	3150	2005	981	1987	1107	1383	1476	1855	2460	3352	3268	1171	1322	1572	1947	2597	2418	2612	1810	2345	2104	2185	2201	2294	1466	1591	1827	2542	1612	4873	2471	2506	1390	3338	1639
Abhd2	439.938	32	562	636	638	319	175	124	564	396	267	40	32	111	1367	754	499	822	331	421	412	860	558	504	296	140	350	395	306	152	283	351	893	1090	382	565	97	137	615	759	809	645	335	978	245	517	195	118	37
Abhd3	1122.88	334	1826	1387	1918	1209	1465	415	1318	552	1062	485	597	995	1800	1162	567	847	458	641	844	1273	1424	1421	1405	334	1140	1537	1840	1298	1179	1266	846	1198	1149	1242	971	1064	925	979	1124	1135	621	2179	1429	1550	676	1530	830
Abhd4	926.125	419	1109	794	994	1367	1373	477	1048	432	937	613	743	878	1417	859	419	1027	467	583	684	850	949	1552	1556	956	613	770	882	1171	1189	1224	840	892	835	944	897	937	635	724	819	1112	714	2116	1052	1128	493	1205	670
Abhd5	537.125	236	996	563	904	619	765	236	704	244	506	246	342	442	765	606	283	483	252	289	357	561	660	783	632	451	483	668	698	631	586	640	421	585	538	529	466	526	430	478	472	549	338	1045	644	789	316	633	358
Abhd6	368.958	155	277	291	350	592	500	178	350	155	317	330	354	442	431	362	167	371	220	265	246	303	266	775	798	195	203	191	257	423	483	466	305	315	274	490	354	467	237	279	308	554	382	1015	363	407	200	634	297
Abhd8	225.062	79	146	207	208	410	352	117	257	79	230	161	222	249	304	201	98	262	109	157	198	185	258	448	373	383	110	139	150	280	278	239	188	207	195	291	218	262	154	176	190	228	154	472	234	249	108	341	151
Abi1	825.333	308	1165	652	1029	810	1065	308	1045	461	881	578	631	755	1136	852	391	853	423	483	543	883	1020	1155	1132	1199	608	737	807	806	858	962	779	863	793	806	702	778	664	816	873	977	660	1785	1057	1172	560	1094	569
Abi2	351.812	174	429	252	386	394	401	207	355	174	337	226	326	265	542	332	202	419	226	272	226	312	387	638	623	322	198	281	296	414	411	449	324	341	231	447	268	355	296	337	334	499	360	884	413	396	203	490	225
Abi3	92.6875	33	44	86	72	151	110	41	103	41	88	253	214	91	153	87	35	92	48	62	75	59	83	225	171	256	33	48	40	85	113	80	84	70	38	109	72	88	50	66	59	74	48	175	85	115	45	99	75
Abi3bp	110.104	26	88	52	85	142	141	52	105	46	89	202	191	111	125	77	44	192	101	94	75	150	93	160	89	539	31	46	26	75	120	132	103	73	33	129	76	103	81	86	88	106	88	278	120	137	47	131	69
Abl1	909.792	416	922	922	1087	1324	1068	416	1111	439	904	869	888	786	1557	924	538	985	504	668	849	921	1088	1607	1322	1181	538	711	740	802	974	1053	851	900	717	964	721	817	779	864	807	1135	758	2094	1001	1035	450	1085	560
Abl2	338.333	138	431	330	489	355	444	138	381	152	308	254	248	233	534	373	194	342	174	203	233	390	401	548	404	416	244	309	339	407	354	425	385	403	315	381	238	238	299	346	374	361	304	702	378	466	203	375	220
Ablim1	1229.29	540	1433	1114	1485	1397	1453	540	1376	677	1297	1095	1006	1055	1835	1359	606	1506	686	938	853	1337	1286	2222	1918	1414	749	1028	1096	1124	1278	1400	1279	1206	940	1612	919	1149	964	1213	1138	1802	1060	3021	1154	1530	659	1486	714
Ablim2	60.7083	20	31	38	43	80	83	27	71	32	75	71	86	60	91	35	20	79	38	38	52	48	71	113	110	66	30	35	32	50	63	44	43	45	26	81	69	64	38	43	45	78	90	173	75	73	42	108	48
Ablim3	133.667	36	104	112	146	201	207	67	194	36	145	206	144	168	137	130	56	140	93	88	82	108	87	315	244	184	55	79	86	169	161	148	100	146	41	122	126	137	99	109	114	164	99	295	171	136	50	227	89
Abo	0.0625	0	0	0	0	0	0	0	0	2	0	0	0	0	0	0	0	0	0	0	0	0	0	0	0	0	0	0	0	0	0	0	0	0	0	0	0	0	0	0	0	0	1	0	0	0	0	0	0
Abr	964.396	440	1066	914	999	1187	1187	466	971	487	938	926	938	921	1492	875	440	1251	580	774	647	913	1228	1788	1621	1246	643	837	914	887	1117	1141	821	865	801	1132	764	1051	697	766	789	1220	718	2444	886	1120	546	1160	609
Abra	1.72917	0	0	2	3	3	3	0	4	2	0	11	4	3	1	1	2	3	2	1	1	0	1	7	1	1	1	0	1	2	1	2	0	2	0	1	0	4	3	2	0	1	0	0	1	0	1	2	0
Abracl	293.333	91	385	298	343	285	352	119	407	159	355	271	251	256	394	244	148	182	91	128	221	350	394	448	397	533	203	275	308	290	279	309	332	329	295	241	238	247	266	243	318	225	184	542	464	422	253	370	230
Abt1	178.5	80	227	168	226	292	289	80	223	95	153	175	153	156	232	154	93	156	83	96	128	183	218	331	332	243	93	156	169	213	198	202	143	180	132	145	150	158	129	121	151	207	136	413	233	193	117	189	133
Abtb1	413.188	151	441	472	512	550	511	151	590	194	473	572	508	421	586	406	202	341	176	234	395	352	520	560	676	388	302	383	369	415	449	433	348	429	368	364	352	357	296	299	309	447	257	839	537	543	272	651	315
Abtb2	280.271	92	271	402	369	412	346	144	424	150	254	92	131	273	398	326	150	254	114	165	236	283	382	477	381	251	206	280	233	324	402	315	230	283	258	330	244	324	229	267	304	318	167	561	280	355	139	375	172
Acaa1a	3522.65	1514	3047	3679	3883	4583	4008	1765	4873	1808	3717	3106	3668	3934	5586	3817	1735	2496	1514	2366	3033	3435	3933	5075	7226	2066	2197	2937	3742	4656	4341	3220	3061	3347	2839	3552	3284	4141	2946	3031	3279	3944	1984	7751	4362	3883	1838	5465	2398
Acaa1b	5132.27	2194	4022	4813	5222	6561	5406	2518	7632	2407	5699	5216	5869	6173	7814	5855	2567	3344	2194	3682	4432	5273	5172	6739	10904	2356	2829	3708	4868	7143	6491	4417	4356	4543	3790	5357	4886	6269	4655	4662	4813	6023	2719	11978	6505	5337	2653	8770	3819
Acaa2	3312.35	1195	2538	2331	2850	4709	4974	1688	4201	1638	3396	1986	2843	4824	3904	3037	1444	3554	1710	2679	2010	2791	2599	6132	7739	1195	1490	1834	2175	4796	3918	3589	2223	3018	1680	3715	3426	4248	2621	3198	2603	4375	2409	8953	3718	3717	1797	6039	3451
Acaca	321.771	129	368	303	422	340	371	134	303	129	236	200	182	234	654	401	154	481	174	299	327	331	394	498	418	721	183	262	293	294	328	361	351	322	266	341	227	246	296	337	371	452	269	692	298	396	138	339	164
Acacb	481.271	175	383	417	425	799	579	213	549	201	513	324	325	402	814	653	283	855	310	572	375	430	448	881	842	175	207	291	270	454	590	534	536	495	326	682	310	434	418	476	385	902	478	1373	364	464	262	577	300
Acad10	1352.04	374	1854	1810	1948	1752	1601	545	2021	817	1125	658	874	1275	2488	1497	790	1173	682	899	1273	1347	1877	1564	1560	374	1184	1509	1939	1333	1381	1461	1274	1583	1541	1336	1243	1390	1133	1239	1447	1454	848	2800	1554	1669	723	1665	759
Acad11	3226.98	958	4020	2930	3921	3510	3677	1400	4779	2118	2943	958	1408	3154	5650	3876	1708	2992	1440	1867	2473	3638	3872	3906	4655	1074	2395	3040	3745	3797	3826	3564	3214	4308	3558	3623	3299	3688	3277	3643	3635	3658	2132	6214	4086	4491	2062	4076	1713
Acad12	766.833	243	1006	901	1130	946	917	315	1097	412	654	275	462	755	1313	840	457	705	365	549	679	687	1075	1024	855	243	678	833	1104	759	823	909	736	882	809	855	767	850	683	667	741	878	534	1709	859	865	391	967	436
Acad8	1036.85	419	1090	1106	1369	1197	1411	445	1459	512	958	631	674	953	1544	1107	572	880	419	632	781	1143	1376	1663	1548	538	836	1082	1219	1180	1125	1033	925	1058	995	1054	871	1030	903	964	1030	1208	732	2256	1289	1437	611	1534	718
Acad9	1232.79	505	1819	1396	1856	1488	1418	519	1524	598	1194	697	935	1003	2072	1220	669	1101	593	831	1029	1432	1721	1815	1561	505	1126	1476	1733	1314	1171	1284	1039	1283	1424	1355	1031	1226	957	1015	1111	1376	847	2570	1346	1657	676	1632	857
Acadl	4143.02	1737	6235	4486	6340	4350	4900	1737	5560	2430	4631	3137	3586	3713	7465	4709	2363	3546	1957	2402	3005	4731	5743	5724	6170	2492	3376	4461	5348	4059	3915	3952	3675	4120	3731	3983	3087	4157	3269	3854	3683	4396	2596	8090	4974	5444	2819	5491	2569
Acadm	13318.5	2759	19769	14705	18575	20691	25914	8192	14210	5554	14555	7792	11633	12763	18242	10741	5476	16349	7986	9511	8241	11980	14623	22368	14792	2759	11397	14906	17216	15785	15077	19052	7964	9354	10858	19578	10028	14151	7755	8564	8943	14956	11281	30487	11786	13430	6370	18703	15423
Acads	2161.04	833	2929	3071	3513	2384	2398	833	3217	1326	1990	1001	1472	1963	4154	2684	1313	1694	871	1158	2156	2258	3262	3021	3325	966	1859	2492	3359	2052	2008	1789	1943	2413	2357	2070	1799	2191	1770	1939	2095	1925	1173	3787	2595	2941	1179	2660	1200
Acadsb	2102.31	828	2771	1747	2398	2424	3101	1055	2519	1073	2239	999	1556	1886	3203	2192	1018	2377	1137	1545	1265	2378	2279	3408	3183	828	1479	1832	2126	2512	2486	2565	1943	2132	1814	2643	1836	2186	1698	1881	2058	2994	1755	5011	2242	2573	1276	2885	1291
Acadvl	4362.17	1924	5095	4771	5988	5526	5656	1924	6334	1985	4355	2680	3305	4462	6986	4569	2330	3956	2005	2824	3503	4702	5598	6779	7198	2264	3263	3912	4909	4643	4756	4490	3942	4473	3888	4692	3684	4577	3481	3922	3797	4919	3001	9275	5152	5461	2963	5761	2972
Acan	0.0625	0	0	0	0	0	0	0	0	0	0	0	0	0	0	0	0	0	0	0	0	0	2	0	0	0	0	0	0	0	0	0	0	1	0	0	0	0	0	0	0	0	0	0	0	0	0	0	0
Acap1	41.8542	5	22	17	14	32	23	15	16	14	44	150	53	32	26	16	14	29	14	11	26	19	26	58	38	667	5	12	16	27	14	15	113	16	18	39	25	22	16	21	22	32	18	47	24	40	6	45	17
Acap2	496.938	195	589	348	537	513	640	195	569	263	523	472	433	365	796	479	291	628	301	388	323	564	521	839	743	616	300	397	366	438	562	636	508	533	337	563	357	435	456	501	486	673	449	1179	562	652	324	609	323
Acap3	177.812	72	154	138	169	260	251	92	179	86	209	254	234	192	203	160	72	174	86	114	138	179	174	356	323	339	91	130	115	183	198	201	146	151	116	208	151	164	108	121	130	218	128	413	205	210	84	252	151
Acat1	7751.62	1929	17103	12446	15866	6978	8075	2412	11390	5115	7231	2290	3552	5423	16822	9340	4775	4870	2827	3570	7059	10365	13486	8226	9164	1929	9287	12170	14047	6344	6309	6050	6463	8226	9629	5011	5041	5457	6991	7597	8139	6744	4052	12263	10342	12177	4729	7732	3617
Acat2	1695.5	623	2272	1821	2583	1545	1985	646	2282	1020	1561	1021	1115	1367	2744	1969	908	1240	623	805	1508	2129	2216	2473	2269	1135	1297	1736	2176	1591	1547	1774	1593	1926	2401	1588	1389	1680	1469	1669	1813	1792	1134	3063	2279	2957	1109	1924	1063
Acat3	736.188	244	917	849	1159	679	760	259	966	469	637	283	373	641	1184	831	415	523	244	307	702	855	925	977	968	520	614	754	1028	720	711	762	756	962	1160	684	646	792	672	758	811	824	466	1315	1010	1257	440	830	414
Acbd3	598.062	234	666	512	760	674	835	234	695	296	583	598	495	488	854	516	311	593	325	420	444	677	704	1062	926	829	382	426	561	634	636	731	533	603	477	646	461	552	469	549	569	776	536	1471	643	733	370	787	345
Acbd4	1046	377	1203	1207	1382	1271	1287	392	1463	523	1035	1136	1037	990	1771	1084	587	828	377	535	871	1028	1486	1551	1739	807	752	1059	1123	1122	1025	879	937	1066	973	881	941	1041	863	886	946	1058	624	1934	1420	1460	722	1467	678
Acbd5	1565.31	525	2627	1478	2347	1373	1637	525	2217	978	1387	591	823	1167	2620	1742	904	1419	702	838	1132	2218	1898	1867	1927	806	1305	1786	1937	1702	1669	1807	1610	1973	1587	1528	1297	1293	1551	1726	1899	1913	1126	3014	2174	2373	1141	1869	885
Acbd6	391.792	170	433	464	436	612	502	170	522	207	410	433	448	440	658	374	178	358	185	231	376	350	498	663	734	434	267	248	333	421	436	399	328	383	332	357	328	363	252	307	298	374	252	794	447	401	262	574	273
Acbd7	0.75	0	0	3	1	0	0	3	0	0	0	5	0	2	1	0	1	0	0	0	0	1	0	0	0	2	0	0	1	1	2	1	0	0	0	0	0	0	3	0	0	0	0	4	3	0	0	1	1
Accs	137.625	45	196	108	136	184	177	54	181	78	185	165	152	117	233	135	57	135	45	82	113	125	168	200	225	124	97	124	115	157	142	131	113	118	100	168	114	119	89	116	93	170	95	321	180	178	69	232	110
Accsl	1.47917	0	0	1	0	1	0	1	4	0	3	0	7	1	2	3	1	0	1	3	3	0	2	4	0	0	3	4	2	4	2	1	0	0	0	1	1	0	0	3	1	0	1	1	1	1	0	6	2
Acd	280.083	123	321	309	324	423	436	123	388	162	301	245	229	308	418	259	133	256	133	159	239	215	307	468	505	330	172	217	295	367	304	283	251	286	248	282	241	310	202	185	210	299	179	547	299	351	200	349	184
Ace	2876.17	711	5040	4088	5186	4135	2938	1014	3039	1282	2080	1384	2087	2084	5991	2939	1533	3672	2028	2479	2298	2759	4210	3461	1650	711	3142	4035	5835	2355	2873	2964	1858	2295	2601	4960	2111	3605	1919	2045	2323	3102	2187	6155	2368	3026	718	4340	1888
Ace2	868.125	274	1346	840	1140	871	1009	304	1392	530	712	345	409	652	1369	873	563	693	274	377	611	1059	1349	946	1038	431	836	1032	1134	1019	896	985	877	1174	994	694	721	811	991	1005	1113	921	555	1543	1421	1378	603	1045	332
Ace3	1.83333	0	0	4	1	8	4	1	3	0	0	0	0	10	0	6	2	1	0	1	1	1	0	6	1	2	0	2	0	1	2	2	1	0	0	0	2	0	1	0	1	6	3	2	1	2	0	3	1
Acer1	0.1875	0	1	0	0	0	0	0	0	0	0	0	0	0	0	0	0	1	0	0	0	0	0	0	0	0	0	0	1	0	0	0	0	0	0	1	1	0	0	0	0	0	1	2	0	0	0	0	0
Acer2	391.75	124	191	199	290	312	337	146	413	174	376	586	597	361	408	342	213	644	269	325	196	386	409	911	861	1157	124	128	166	236	304	480	302	262	133	412	311	343	219	333	312	734	505	1414	302	592	186	383	293
Acer3	216.396	80	295	190	246	230	292	94	276	80	225	144	138	192	306	225	106	204	101	145	146	199	211	385	325	309	171	225	186	233	234	239	192	216	212	214	196	204	190	242	246	270	153	444	265	290	129	310	151
Ache	90	30	80	50	75	134	135	30	79	32	123	243	155	103	107	58	38	114	58	72	46	60	93	204	146	53	50	65	65	90	82	69	77	52	34	187	100	122	54	55	69	97	60	204	77	99	54	130	93
Acin1	1991.69	754	1797	1976	2357	2448	2792	754	2614	1013	2410	3311	2296	2205	2713	1733	949	1954	990	1234	1483	1879	2335	3751	3566	3021	1238	1354	1555	1965	2055	1979	1743	1932	1424	1926	1524	1660	1533	1597	1695	2215	1419	4353	2109	2277	1227	2707	1245
Ackr1	1.25	0	0	0	0	0	0	0	0	0	0	0	2	1	0	0	0	1	0	0	0	0	0	2	0	38	0	0	0	0	0	0	4	0	3	0	2	2	0	1	0	0	1	0	0	1	0	2	0
Ackr2	7.52083	0	2	0	5	11	10	4	2	4	4	8	9	14	3	4	0	12	24	5	0	5	4	9	26	35	2	4	3	3	6	8	40	2	3	6	6	5	2	3	3	5	4	18	8	4	8	4	8
Ackr3	630.896	268	722	620	477	977	880	268	958	364	672	317	467	520	818	547	310	685	293	430	400	675	720	1010	653	968	321	490	497	881	641	786	739	655	518	1103	568	661	525	524	504	532	367	1168	797	822	505	1005	513
Ackr4	7.33333	0	10	3	10	5	9	2	6	3	16	26	10	6	10	9	2	7	7	0	5	6	10	9	16	13	2	6	7	7	5	3	10	9	3	5	3	5	3	6	5	14	5	18	7	4	5	13	4
Acly	3127.83	1055	3019	2572	3275	3707	3862	1055	4589	1492	2624	1320	1835	3464	4583	3255	1622	3369	1733	2279	2485	3351	3498	4609	3950	3863	1773	2337	2654	2731	2930	3247	3126	4471	3528	3663	3815	3459	2519	2877	3102	3691	2389	6644	3925	4276	2185	4650	2421
Acmsd	1196.02	269	2098	1368	1993	1575	2402	821	1345	532	1162	360	509	1213	1046	1142	583	1546	659	639	691	969	1004	2032	1839	269	881	1213	1040	1889	1457	2177	815	1104	1270	1046	1114	1377	818	953	1084	1221	886	2355	1127	1445	587	1835	908
Acnat1	2040.27	770	1415	1017	1145	2537	3674	1367	2362	1126	2335	1426	1483	2373	2344	1408	917	2790	1486	1691	814	1723	1672	3924	3188	903	770	938	982	2489	2731	3447	1640	2600	1488	2964	2230	2521	1478	1648	1990	2834	1983	5263	2237	1822	1676	3308	1928
Acnat2	1389.65	408	901	1025	1115	1103	1661	523	2627	1412	1576	765	851	1736	2076	1551	958	1663	875	998	877	1523	1686	2368	2804	408	644	739	744	1033	1132	1362	1745	2661	1637	1480	1268	1708	1077	1667	1931	1021	922	2560	1881	1787	1540	1349	728
Aco1	5720.35	1990	7919	7248	8226	7441	6419	2510	8067	3279	4826	1990	2698	4923	10373	5954	3149	4960	2375	2991	5139	6688	7063	7054	7175	2926	4835	6376	7574	6293	7120	6478	5345	6758	6122	5376	5415	5272	5203	5335	5825	6429	3417	11800	7246	7889	3591	6994	3079
Aco2	12400.4	4792	16762	15061	17956	17031	16106	5753	16490	6412	10598	4792	7407	12090	20404	12619	6320	11643	5820	7565	10409	12617	15312	17708	17816	5020	10193	12220	15582	14111	15536	14275	10430	13288	12877	13118	11517	12355	9549	10726	11354	14464	8363	26166	14530	16453	7144	15495	8382
Acot1	1398.17	630	1729	1389	1643	2280	2133	781	2141	630	1465	768	1340	1655	1774	1454	670	1424	823	811	940	1195	1614	1872	2459	704	790	1092	1208	1802	1804	1458	1413	1247	1071	1489	1169	1949	1143	1802	1265	1437	870	2932	1596	1189	962	2161	804
Acot10	149.354	48	306	139	286	112	134	48	189	98	147	82	133	127	194	159	81	111	82	60	118	173	237	212	169	147	145	203	233	127	111	162	132	141	192	155	116	144	110	124	156	156	96	308	146	235	87	180	94
Acot11	363.875	126	420	452	646	366	400	126	705	224	289	243	211	297	819	390	270	398	175	260	327	355	397	443	522	216	291	358	569	282	287	299	366	593	407	264	229	362	246	418	369	347	241	716	430	530	250	331	184
Acot12	1876.73	410	4368	2570	3897	1460	1653	522	3025	1376	1498	554	755	1137	4079	2461	1317	1228	710	696	1739	2493	2943	1379	1701	410	2218	2989	3409	1621	1611	1452	1831	2643	2540	1347	1044	1347	1866	2506	2332	1509	886	2864	2485	2918	1402	1739	809
Acot13	1121.94	458	1524	1084	1400	1463	1652	599	1160	514	1516	1347	1377	1122	1528	960	485	1110	560	708	715	794	1088	2116	2015	458	734	974	1229	1369	1344	1411	695	821	945	1201	931	1074	709	700	845	1190	795	2370	1203	1324	652	1899	1205
Acot2	1149.77	546	1358	1107	1327	1762	1778	607	1698	546	1169	728	1106	1425	1586	1137	559	1277	644	747	783	1078	1350	1608	2096	676	700	853	1001	1488	1419	1157	1124	1076	869	1213	962	1444	833	1373	961	1192	698	2325	1369	1052	752	1693	760
Acot3	681.417	176	389	442	419	1220	1261	463	701	324	850	530	713	885	658	581	230	844	433	656	318	401	474	1193	1300	248	176	287	323	1083	1027	820	502	491	350	1010	895	1198	519	591	493	1126	483	1653	718	446	357	1428	509
Acot4	858.667	287	837	740	855	1100	1042	435	1096	481	806	564	609	809	1226	965	432	874	438	605	542	818	1008	1493	1494	287	495	687	743	1101	1080	1009	830	1022	774	1177	832	988	817	931	936	1011	563	1878	1051	910	491	1210	525
Acot5	275.458	119	269	259	293	445	437	167	388	121	294	119	189	354	325	297	127	284	180	192	213	224	308	434	484	131	153	182	241	386	371	289	254	253	213	368	282	387	248	326	252	308	168	557	312	212	182	412	146
Acot6	226.188	91	195	220	223	344	333	105	322	91	197	94	107	272	287	241	121	217	106	162	186	145	221	386	391	109	136	185	206	289	343	250	209	268	191	265	272	301	207	272	250	281	149	478	268	185	144	327	143
Acot7	435.083	98	215	290	253	1148	1077	444	318	126	420	621	628	458	332	242	98	511	235	356	230	235	281	1127	571	395	146	167	203	675	677	689	222	237	228	976	366	553	171	152	209	449	344	1194	305	345	163	698	746
Acot8	317.854	136	303	359	319	509	499	146	401	136	368	342	336	342	434	296	142	312	160	167	231	251	310	594	578	211	184	247	333	361	376	326	240	287	213	363	308	337	218	230	257	357	219	742	360	375	177	530	283
Acot9	526.208	169	954	552	968	409	503	169	654	340	544	284	411	490	696	586	236	411	212	246	404	642	783	739	668	579	534	680	769	530	434	551	526	499	657	529	382	465	387	456	476	525	363	1074	567	824	346	617	313
Acox1	13988.3	3894	27521	20406	30331	9231	10880	3894	24229	9921	10676	5168	5589	8996	31443	19331	9777	8927	4797	5423	13010	20463	22964	11429	16679	4446	16072	21665	27620	9795	10562	10146	15129	18903	18480	9134	7632	9891	13510	17980	17775	10980	6510	19822	19162	23746	10516	11357	4824
Acox2	1272.75	494	1790	1403	1785	1741	1613	725	1360	724	1487	792	1163	1220	2036	1164	641	1405	682	721	861	1070	1483	1801	1687	494	998	1365	1561	1788	2109	1629	905	903	1114	1557	1271	1597	997	825	1097	1673	817	2698	1416	1434	615	1655	541
Acox3	2746.27	664	5319	4047	5303	1774	2061	664	4917	2188	2004	1207	1178	1531	7345	3619	2020	1733	871	1103	2886	3897	4637	2484	2720	965	3009	4060	5044	1811	2018	1750	3041	4146	3957	1660	1541	1842	2854	3060	3485	1897	1031	3543	4258	5376	2107	1901	1010
Acoxl	2.70833	0	0	2	0	2	3	1	1	1	4	4	0	2	9	2	1	3	1	1	0	0	3	5	3	4	2	2	0	3	3	2	3	5	0	6	3	5	5	2	3	5	3	9	1	4	3	4	2
Acp1	733.646	327	964	600	955	786	978	327	933	375	803	693	638	671	1008	721	341	623	340	428	470	746	919	1132	1165	767	558	729	805	883	854	827	633	776	761	770	631	697	562	607	667	797	547	1502	863	894	453	1066	491
Acp2	546.5	258	660	533	582	702	696	258	596	299	504	553	461	434	772	522	280	623	291	401	380	496	582	952	753	794	377	525	535	575	563	638	523	563	447	578	483	539	438	493	514	611	397	1194	602	686	337	748	419
Acp5	636.938	261	708	674	758	866	894	303	787	261	650	572	569	716	941	598	273	592	345	318	476	624	708	1133	1120	1055	426	506	608	668	705	602	535	686	624	652	626	640	439	393	507	586	347	1213	647	754	334	1085	493
Acp6	785.396	329	923	875	1073	967	1008	345	1018	424	962	971	898	687	1212	738	376	724	329	375	656	670	949	1063	1254	481	544	752	838	924	968	824	582	783	683	665	659	751	600	567	685	824	559	1662	970	1061	504	1169	602
Acpp	107.5	43	140	81	92	95	105	43	139	93	114	130	165	89	206	98	63	132	60	73	94	90	128	258	195	102	59	73	54	92	79	80	120	108	87	84	90	100	84	93	98	125	82	261	116	122	79	129	79
Acpt	0.104167	0	0	0	0	0	0	0	0	0	0	0	0	1	0	0	0	0	1	0	0	0	0	2	0	0	0	0	0	0	0	0	1	0	0	0	0	0	0	0	0	0	0	0	0	0	0	0	0
Acr	4.125	0	1	3	2	6	2	5	9	0	2	0	20	7	3	5	0	2	3	1	2	2	6	7	7	6	3	4	1	3	2	2	3	1	0	3	4	4	1	1	3	10	6	14	4	7	3	8	9
Acrbp	112.729	38	138	93	122	125	144	38	97	43	141	291	214	112	139	85	46	115	65	66	85	100	158	195	175	204	56	88	73	117	100	126	89	96	77	54	95	84	69	48	81	139	67	266	114	127	59	216	96
Acrv1	0	0	0	0	0	0	0	0	0	0	0	0	0	0	0	0	0	0	0	0	0	0	0	0	0	0	0	0	0	0	0	0	0	0	0	0	0	0	0	0	0	0	0	0	0	0	0	0	0
Acsbg1	17.3958	0	2	9	0	8	5	2	25	7	8	21	26	15	27	16	4	24	8	4	13	13	21	43	22	250	2	7	3	2	5	6	19	12	9	25	15	17	1	6	12	9	8	13	16	26	4	17	14
Acsbg2	0.0625	0	1	0	0	0	0	0	0	0	0	0	0	0	0	0	0	0	0	0	0	0	0	0	0	0	0	0	0	0	0	0	0	0	0	0	0	1	0	0	0	0	0	0	0	0	0	0	0
Acsf2	563.604	139	304	283	268	870	976	330	493	203	570	579	587	954	440	332	175	708	403	510	219	242	271	1196	1348	684	139	194	195	782	827	749	402	326	154	1014	790	1063	266	320	266	825	452	1644	415	448	181	1170	776
Acsf3	862.875	388	972	1058	1265	1120	1192	388	1260	460	789	517	768	926	1333	902	477	678	413	503	743	793	1092	1321	1264	412	667	864	962	951	998	863	739	915	772	819	703	871	643	717	801	851	509	1839	1115	1089	573	1274	623
Acsl1	5431.4	1904	4406	2886	3838	9362	11744	3494	5830	2082	6750	3519	3882	7938	5814	3902	2183	7886	4999	5180	2049	3055	3810	10359	11342	1904	1960	2650	2675	7965	7028	8640	3959	4409	2576	8546	5551	7512	3361	4921	4013	7778	5319	14344	4419	3116	3146	9608	5103
Acsl3	366.583	151	579	297	589	516	542	175	405	166	350	227	214	346	577	391	176	291	151	220	321	409	417	564	501	233	239	330	412	472	503	457	323	294	323	315	327	275	333	400	420	470	290	790	370	437	225	484	183
Acsl4	785.438	295	780	466	726	761	997	331	753	295	711	419	476	758	1109	751	383	941	458	641	450	831	676	1184	1239	753	418	567	601	999	942	1019	782	822	619	1174	910	887	688	791	863	1304	768	2305	756	932	419	1203	570
Acsl5	1186.88	397	1303	907	1153	1546	1665	562	1115	397	1173	733	1083	1263	1381	1069	460	1363	677	924	748	1001	1057	2199	1855	1848	758	886	1030	1485	1422	1373	1237	1028	966	1827	1117	1341	849	948	950	1629	1002	3039	1084	1277	626	1709	1133
Acsl6	5.625	0	0	1	0	5	3	1	2	2	12	10	5	6	3	6	6	5	2	3	4	3	12	25	10	2	0	0	1	0	4	2	13	2	7	7	2	14	7	10	3	4	12	21	2	7	3	12	7
Acsm1	2515.69	469	2669	2217	2827	4394	5513	1774	1769	802	3195	2971	3233	3123	2383	1342	639	2993	1555	2365	1045	1295	1788	5884	4289	469	1717	2087	2631	3584	3434	3909	948	1318	1278	3514	2127	3243	1091	1118	1390	3666	2060	7096	1698	1904	491	4718	2904
Acsm2	31976.8	2911	80522	61050	81444	17227	22911	8241	55129	26593	26399	9392	8022	13146	89458	49964	27558	16525	6638	9638	32538	55613	62872	26120	27320	2911	46224	61646	69013	19216	16415	17889	28277	40614	46219	6641	10388	11769	36444	40888	43751	16034	8953	29105	50001	64697	18983	17598	7637
Acsm3	2045.02	2	13682	7853	11492	22	36	26	1600	815	663	4	2	45	6530	2313	1153	20	6	15	1819	2762	5047	25	45	32	6710	10334	12988	53	40	30	642	794	2215	14	20	27	907	1182	1573	44	25	59	1334	2862	248	36	7
Acsm4	0.333333	0	0	0	0	1	0	0	1	0	0	0	2	0	2	0	0	0	0	0	2	0	0	1	0	0	0	2	0	0	0	0	1	0	0	0	0	1	1	0	0	0	0	0	0	1	1	0	0
Acsm5	1250.12	150	1772	1578	1811	1504	1592	546	1651	841	1185	966	982	1058	2117	1332	641	1036	559	838	856	1322	1784	1831	1657	150	1128	1529	1656	1364	1564	1637	806	1352	1404	955	835	1135	1126	1118	1210	1473	782	2733	1489	1751	571	1396	626
Acss1	3546.94	618	2622	2697	3387	6031	7707	2147	3449	1496	3252	1401	1738	5039	3121	2611	1334	4374	2073	3024	1556	2185	2431	6904	7921	618	1885	2197	2633	6069	5839	5729	2192	2992	2003	4625	4240	5308	2543	2748	2640	5587	3244	9314	3194	3097	1391	6074	2775
Acss2	3163.08	978	5126	4186	5257	2854	3001	1046	5808	2463	2736	1331	1558	2088	6779	3865	2091	2042	978	1329	3513	4544	5653	2870	2947	1231	3277	4111	4669	2598	2676	2523	3115	4187	4165	2204	2054	2343	3597	3401	3824	2587	1506	4593	5144	5547	2524	3207	1320
Acss2os	3.60417	0	8	9	7	3	6	0	7	8	14	10	1	2	6	8	2	4	0	2	1	4	4	6	8	4	1	1	2	1	1	2	5	8	1	0	1	0	3	1	4	2	0	0	4	6	1	5	0
Acss3	75.9375	11	61	64	87	107	97	40	48	38	95	18	11	102	114	61	32	159	51	109	35	68	40	153	179	30	35	46	65	93	78	109	50	82	46	140	87	71	62	77	70	141	80	204	38	63	38	93	47
Acta1	270.417	74	210	359	385	423	353	105	324	74	209	143	198	347	343	223	137	195	104	135	322	239	249	463	346	667	137	221	217	273	270	316	250	202	211	282	253	293	175	176	211	267	180	665	420	419	168	427	201
Acta2	848.417	332	652	651	993	1096	1071	404	774	343	973	1481	1291	830	1069	693	332	843	402	451	687	709	663	1685	1449	3300	341	469	518	890	851	781	531	504	434	823	770	669	452	496	629	853	592	1853	911	1089	452	1349	899
Actb	12079.8	5014	11642	11720	15325	14046	15574	5354	12297	5014	12946	14611	13412	12855	17316	10315	5302	11099	5721	6014	10242	10113	11776	23264	18934	38578	6513	8713	9999	12149	13781	13099	11181	9092	9141	12574	10717	11652	7662	8105	9506	11200	7752	23630	14035	14862	6475	16578	9541
Actbl2	0.0208333	0	0	0	0	1	0	0	0	0	0	0	0	0	0	0	0	0	0	0	0	0	0	0	0	0	0	0	0	0	0	0	0	0	0	0	0	0	0	0	0	0	0	0	0	0	0	0	0
Actc1	0.895833	0	0	1	0	1	1	1	0	0	0	0	4	1	0	2	1	1	0	0	0	0	0	0	1	0	0	1	0	0	0	0	3	0	0	1	1	4	0	2	1	5	0	3	0	5	1	2	0
Actg1	13109.7	5550	12596	12191	18594	17597	16984	6030	14140	5550	12092	6279	8645	16175	19739	12779	6244	12102	5794	7400	9976	11929	13709	22305	19044	24737	8181	11041	14135	17814	18135	16210	12716	12021	11674	13730	12828	13040	9390	10198	11980	14310	8800	27690	15446	15405	7024	17822	8252
Actg2	4.77083	0	0	1	5	6	1	2	1	0	0	4	3	3	6	4	5	13	2	6	15	0	3	0	6	27	0	0	0	1	2	4	8	1	3	4	2	1	4	6	3	17	10	28	2	13	2	5	0
Actl10	0.25	0	0	0	0	0	0	0	0	0	0	0	0	0	3	0	0	0	0	0	0	0	1	0	1	0	0	1	0	0	0	0	1	2	0	1	0	0	0	0	1	0	0	1	0	0	0	0	0
Actl11	0	0	0	0	0	0	0	0	0	0	0	0	0	0	0	0	0	0	0	0	0	0	0	0	0	0	0	0	0	0	0	0	0	0	0	0	0	0	0	0	0	0	0	0	0	0	0	0	0
Actl6a	504.042	220	617	626	768	560	610	229	628	241	505	270	360	457	851	485	248	381	227	220	485	640	664	728	601	551	393	546	600	521	562	521	474	601	501	439	405	464	426	487	470	461	345	997	630	780	331	618	360
Actl6b	0.0208333	0	0	0	0	0	0	0	0	0	0	0	0	0	0	0	0	0	0	0	0	0	0	0	0	0	0	0	1	0	0	0	0	0	0	0	0	0	0	0	0	0	0	0	0	0	0	0	0
Actl7a	0.104167	0	0	0	0	0	0	0	0	0	0	0	0	0	2	0	0	1	0	0	1	0	0	0	0	0	0	0	0	0	0	1	0	0	0	0	0	0	0	0	0	0	0	0	0	0	0	0	0
Actl7b	0.333333	0	0	0	0	0	1	0	2	0	0	1	0	0	0	0	0	0	0	0	1	0	2	1	0	0	0	1	1	1	0	0	0	0	1	0	0	0	0	0	0	1	0	1	1	0	1	0	0
Actl9	2.625	0	1	0	2	11	4	1	3	1	2	7	5	4	0	1	1	2	2	1	0	2	8	4	0	1	1	9	3	3	1	0	3	4	2	0	3	4	2	0	3	3	1	5	6	2	2	5	0
Actn1	669.771	266	511	501	641	946	956	306	637	353	694	884	835	796	776	543	289	845	410	476	467	468	600	1387	931	2875	266	311	373	640	736	809	492	475	342	750	570	696	372	430	462	733	555	1519	601	741	317	864	541
Actn2	4.6875	0	6	7	1	6	3	1	6	7	0	5	1	2	9	1	5	3	1	1	3	11	13	12	11	11	2	5	3	5	3	5	5	0	10	4	1	2	5	3	4	6	5	16	4	0	0	9	1
Actn3	13.3958	1	19	14	10	21	12	12	8	3	10	10	10	11	16	14	6	19	10	9	10	1	11	20	16	6	5	11	13	21	22	21	15	10	5	18	4	23	16	17	11	23	9	44	22	6	15	16	14
Actn4	6272.6	2668	6051	6391	7624	8578	9012	2668	8437	2941	5796	5123	5804	7066	8867	6070	3152	6601	3235	4027	5123	5457	6666	10991	9464	7816	3732	4654	5191	6431	7362	7095	5237	6391	4886	6988	5985	6877	5111	5490	5608	7083	4534	14046	7207	7754	3435	8610	4441
Actr10	843.979	365	1119	772	1002	953	1029	381	934	441	906	518	677	805	1233	779	408	776	365	542	559	846	1068	1324	1253	703	563	827	925	1027	999	1013	736	845	795	840	750	828	682	743	864	980	667	1890	1041	1141	536	1262	589
Actr1a	1235.9	542	1500	1298	1570	1529	1666	542	1578	612	1207	808	871	1143	1867	1289	620	1124	621	773	1005	1329	1494	2052	1749	1894	896	1211	1381	1346	1282	1235	1093	1287	1186	1315	1025	1148	989	1165	1160	1204	822	2425	1491	1661	724	1532	847
Actr1b	1404.65	631	1548	1548	1895	1878	1947	664	1731	631	1225	947	962	1324	2068	1378	681	1260	656	891	1168	1258	1715	2239	2172	1211	1069	1275	1508	1606	1691	1630	1127	1523	1343	1734	1340	1512	1164	1135	1337	1618	968	2985	1551	1740	822	1904	987
Actr2	2664.56	1115	3502	2006	3533	2676	3442	1115	3002	1284	2633	1677	1762	2245	3849	2587	1304	2479	1271	1673	1758	3120	2936	4089	3412	3549	2043	2795	2910	2835	2936	3053	2651	2746	2484	3259	2235	2568	2305	2445	2735	3156	1965	5798	3301	3894	1788	3567	1843
Actr3	2336.21	964	2955	1891	2815	2607	3086	964	2640	1112	2252	1403	1590	2071	3200	2137	1049	2012	1084	1303	1542	2472	2600	3647	3098	5154	1653	2042	2394	2686	2683	3011	2442	2333	2115	2569	2141	2253	1848	1920	2153	2705	1657	4984	3023	3114	1413	3215	1606
Actr3b	4.33333	0	2	9	2	1	3	1	6	8	6	7	2	5	9	7	2	2	4	5	5	0	6	9	8	21	1	0	0	5	2	4	1	3	1	3	2	7	2	8	4	3	0	8	3	6	2	5	3
Actr5	135.104	44	178	142	199	194	195	60	182	72	130	115	137	144	180	118	57	124	44	102	120	123	185	233	239	164	87	103	115	138	147	126	135	118	140	124	111	133	101	111	108	150	88	300	144	170	66	169	90
Actr6	125.083	53	151	96	210	120	149	54	149	78	106	136	83	126	167	138	74	97	59	53	72	103	155	157	212	79	79	113	142	102	120	125	128	147	95	126	133	132	93	130	160	179	106	298	161	214	105	130	80
Actr8	471.125	194	693	480	629	578	575	194	603	272	414	313	391	442	792	471	261	424	244	267	356	425	585	807	763	443	342	412	512	510	527	482	445	528	488	478	362	411	371	423	409	566	371	923	550	623	313	599	285
Actrt1	0	0	0	0	0	0	0	0	0	0	0	0	0	0	0	0	0	0	0	0	0	0	0	0	0	0	0	0	0	0	0	0	0	0	0	0	0	0	0	0	0	0	0	0	0	0	0	0	0
Actrt2	0.0833333	0	0	0	0	0	0	0	0	0	0	0	0	0	0	0	0	0	0	0	0	0	0	0	0	0	0	0	0	0	0	0	0	0	0	0	0	0	0	0	0	0	0	2	0	1	0	0	1
Actrt3	1.3125	0	0	0	0	1	7	0	2	0	7	0	0	1	1	3	0	3	0	1	1	0	0	0	3	0	0	2	1	2	1	1	3	3	0	2	1	1	0	0	1	2	0	5	2	2	1	1	1
Acvr1	179.938	66	156	123	204	266	283	88	164	66	221	177	140	170	223	151	75	199	98	123	122	149	181	287	254	324	111	166	176	240	208	243	157	179	134	209	182	174	131	148	141	232	150	434	176	224	99	250	109
Acvr1b	573.083	219	686	571	735	809	754	262	677	237	509	219	279	509	956	556	323	553	259	415	448	533	634	863	751	307	439	536	573	664	712	655	615	639	531	747	548	562	557	590	597	845	431	1334	651	691	310	769	386
Acvr1c	0.791667	0	0	0	0	2	0	0	0	0	0	0	0	0	6	0	1	3	0	0	6	0	0	0	0	4	0	0	0	0	0	0	1	2	0	1	0	0	0	1	0	6	3	1	0	1	0	0	0
Acvr2a	345.25	153	398	235	439	351	481	153	385	202	394	235	254	261	575	353	205	451	222	264	214	418	394	464	536	261	208	276	305	357	362	476	313	338	247	374	254	288	281	355	383	526	324	940	393	457	221	376	197
Acvr2b	34.8333	10	38	53	54	44	35	12	17	32	42	40	47	48	65	34	30	28	10	21	36	37	23	40	60	17	31	39	50	35	31	18	28	33	35	38	30	36	33	23	25	39	20	65	35	44	28	57	20
Acvrl1	325.542	99	224	256	307	424	410	163	363	163	454	635	492	407	410	234	125	429	232	197	246	256	320	669	645	867	99	153	150	337	332	342	239	208	177	379	323	356	194	227	220	265	224	720	367	350	162	415	243
Acy1	1668.65	317	1780	1522	1745	2696	2515	1324	1377	551	2140	2761	3016	1340	2169	1192	643	1896	777	1205	1002	1278	1706	3438	2474	317	1133	1363	1831	2561	2465	1980	817	971	1149	2412	1216	1930	976	810	1031	2108	1280	4209	1533	1535	689	2745	1483
Acy3	14924.6	2195	37494	32571	41747	10085	9660	3401	26051	10580	12968	6079	7243	6503	35352	20220	12138	6934	3394	4696	18927	21880	33425	10440	8941	2195	23513	31548	35383	7155	6916	7273	13732	16105	22552	7546	4676	6860	14128	13526	18727	6861	4173	13855	19634	28094	10821	9849	6256
Acyp1	143.458	52	116	130	196	183	249	63	200	52	139	102	123	158	164	115	70	118	58	75	93	129	148	217	244	116	99	108	148	150	163	187	120	146	127	161	114	138	123	121	118	162	86	318	231	228	92	232	118
Acyp2	254.062	79	314	261	362	284	353	104	370	105	300	231	223	267	322	217	79	166	98	163	174	341	332	336	236	125	216	278	298	272	308	307	196	292	248	257	212	237	226	209	220	253	171	536	358	393	199	349	204
Ada	32.7083	9	18	18	21	52	27	11	38	28	23	74	64	56	19	22	23	34	17	31	26	34	21	106	66	70	9	10	21	22	20	35	30	23	15	41	28	38	21	19	15	40	38	73	18	28	15	48	34
Adad1	0.0833333	0	0	0	0	0	0	0	0	0	0	0	0	0	0	0	0	0	0	0	0	1	0	0	0	0	0	0	0	0	1	0	0	0	0	0	0	0	1	0	0	0	0	1	0	0	0	0	0
Adad2	0.125	0	0	0	0	1	0	0	0	0	2	0	0	0	0	1	0	0	0	0	0	0	0	0	0	0	0	0	0	1	0	0	0	0	0	0	0	0	1	0	0	0	0	0	0	0	0	0	0
Adal	182.896	70	365	172	349	155	185	77	202	178	195	88	100	105	312	249	134	163	70	86	158	247	277	271	194	115	163	219	310	159	135	186	184	234	221	157	122	159	146	205	205	206	101	299	205	267	102	159	108
Adam10	1138.71	494	1555	915	1365	1211	1512	550	1140	494	1017	608	802	930	1759	1039	559	1240	628	803	669	1322	1207	1798	1439	1671	799	1056	1129	1281	1367	1390	1077	1263	983	1504	926	1036	962	1008	1095	1485	1004	2660	1320	1505	695	1464	800
Adam11	164.562	51	234	215	351	171	85	55	240	121	162	217	111	132	416	193	87	136	51	78	206	190	218	202	194	369	138	112	236	111	121	120	146	219	159	103	90	114	130	112	133	178	92	242	227	317	79	162	60
Adam12	52.125	15	71	49	62	97	93	27	31	26	74	82	80	46	73	43	19	101	71	35	28	41	47	69	41	216	16	30	24	39	53	106	30	32	23	58	32	30	39	48	54	17	28	91	49	52	15	58	35
[truncated: 22,423 more rows]
[truncated: 1 more columns]

## Sheet: excluded min<=10 or contain rik
SampleID	M2_M_SPF_1	M2_M_SPF_2	M2_M_SPF_3	M2_F_SPF_1	M2_F_SPF_2	M2_F_SPF_3	M24_M_SPF_1	M24_M_SPF_2	M24_M_SPF_3	M24_F_SPF_1	M24_F_SPF_2	M24_F_SPF_3	M12_M_SPF_1	M12_M_SPF_2	M12_M_SPF_3	M12_F_SPF_1	M12_F_SPF_2	M12_F_SPF_3	M19_M_SPF_1	M19_M_SPF_2	M19_M_SPF_3	M19_F_SPF_1	M19_F_SPF_2	M19_F_SPF_3	M2_M_GF_1	M2_M_GF_2	M2_M_GF_3	M2_F_GF_1	M2_F_GF_2	M2_F_GF_3	M24_M_GF_1	M24_M_GF_2	M24_M_GF_3	M24_F_GF_1	M24_F_GF_2	M24_F_GF_3	M12_M_GF_1	M12_M_GF_2	M12_M_GF_3	M12_F_GF_1	M12_F_GF_2	M12_F_GF_3	M19_M_GF_1	M19_M_GF_2	M19_M_GF_3	M19_F_GF_1	M19_F_GF_2	M19_F_GF_3
Class	M2_M_SPF	M2_M_SPF	M2_M_SPF	M2_F_SPF	M2_F_SPF	M2_F_SPF	M24_M_SPF	M24_M_SPF	M24_M_SPF	M24_F_SPF	M24_F_SPF	M24_F_SPF	M12_M_SPF	M12_M_SPF	M12_M_SPF	M12_F_SPF	M12_F_SPF	M12_F_SPF	M19_M_SPF	M19_M_SPF	M19_M_SPF	M19_F_SPF	M19_F_SPF	M19_F_SPF	M2_M_GF	M2_M_GF	M2_M_GF	M2_F_GF	M2_F_GF	M2_F_GF	M24_M_GF	M24_M_GF	M24_M_GF	M24_F_GF	M24_F_GF	M24_F_GF	M12_M_GF	M12_M_GF	M12_M_GF	M12_F_GF	M12_F_GF	M12_F_GF	M19_M_GF	M19_M_GF	M19_M_GF	M19_F_GF	M19_F_GF	M19_F_GF
A1cf	619	554	607	478	458	156	620	461	461	147	108	278	1109	741	434	770	313	414	377	840	539	676	616	85	364	529	455	395	472	525	710	988	474	494	293	309	623	855	805	571	372	1104	468	626	290	404	177	145
A4galt	228	218	281	525	519	175	349	119	393	346	472	356	309	211	101	383	187	194	250	277	274	570	455	369	141	172	184	395	401	334	284	267	203	518	331	385	234	241	227	378	229	785	345	255	178	536	264	273
A4gnt	240	106	167	175	155	37	223	73	110	51	105	87	209	162	58	132	59	118	108	222	271	155	69	69	130	150	164	167	149	162	115	150	149	174	98	136	112	108	135	206	107	322	155	175	127	186	87	55
AA388235	44	19	33	51	69	17	80	25	46	20	38	39	45	38	14	56	28	34	23	31	39	62	67	16	30	27	35	55	44	62	36	33	18	35	42	35	22	31	39	58	37	137	53	48	29	67	23	24
AA415398	97	71	90	82	103	21	87	55	80	73	85	66	112	86	54	89	44	43	37	60	118	97	98	50	57	77	75	76	83	81	67	86	66	83	52	77	57	74	82	117	65	162	93	92	66	140	49	44
AA474331	108	140	148	125	153	60	170	83	95	51	41	131	208	150	94	127	50	80	95	147	169	160	187	60	110	150	178	163	150	189	132	221	178	162	142	151	122	164	162	130	85	353	144	167	97	180	65	73
AA986860	207	142	179	353	270	98	217	88	241	176	176	183	347	201	93	290	151	164	155	169	287	434	311	241	113	150	150	263	286	229	210	175	166	276	150	187	140	171	155	314	225	544	236	230	107	312	141	88
Aaas	239	171	233	234	302	106	259	121	197	281	186	176	285	206	84	200	106	119	150	199	235	325	332	325	154	190	188	211	206	209	216	221	220	194	166	203	138	145	195	203	169	395	250	267	128	319	137	140
Aacs	2409	2413	2660	1691	1743	453	2926	952	1220	618	738	596	3783	1458	805	892	424	532	2394	2634	2871	1280	736	763	2092	2439	4128	916	1137	1503	1362	2265	2079	1357	1030	910	1198	1216	1268	1460	1066	2704	1911	2537	1006	1179	756	600
Aadac	1914	1259	1849	1926	2256	829	1834	941	2041	1264	1381	1759	2134	1626	791	1702	845	1148	1076	1568	1732	2843	3091	643	1150	1601	1677	2563	2258	2271	1265	1631	1475	1796	2078	2007	1320	1417	1629	2080	1354	4013	1785	1952	897	2625	1171	1194
Aadat	5806	3233	5312	18643	19849	6972	2335	1436	12490	10295	16085	12637	4218	2270	1436	17121	10092	11459	1932	2886	3569	23885	12282	273	2797	3549	4253	17546	17192	19874	1560	1902	3053	22496	10515	15510	1734	2059	2581	17707	12273	34279	2309	2624	1679	23379	14502	7141
Aaed1	373	222	327	300	366	126	394	170	236	124	150	267	445	328	164	325	160	194	178	256	374	364	378	185	210	282	294	276	342	351	274	322	297	319	274	323	263	284	291	400	210	604	350	380	198	342	180	138
Aagab	550	528	676	795	762	281	710	305	621	496	539	566	857	585	319	543	246	334	366	535	635	994	935	568	352	492	607	668	689	648	507	628	476	589	524	612	440	472	486	690	424	1218	693	768	355	811	384	375
Aak1	923	755	986	854	1092	389	1043	530	897	507	518	814	1504	964	519	1093	491	625	578	1064	957	1523	1399	900	561	706	815	967	998	1061	879	1020	675	1011	708	869	778	844	975	1175	729	1988	978	1132	467	1063	477	447
Aamdc	371	344	420	476	517	130	447	165	452	324	388	376	494	311	147	291	151	197	247	283	421	648	559	234	259	318	366	465	363	392	263	350	326	346	297	322	250	281	296	335	207	703	480	455	236	534	221	257
Aamp	2415	2703	3284	3131	3095	921	3100	920	2361	1977	2150	2389	3331	2155	1161	1831	931	1146	1905	2117	2735	3666	3798	1863	1723	2193	2493	2546	2547	2193	1820	2181	1944	2123	1889	2174	1709	1806	1954	2240	1388	4701	2674	2894	1272	3347	1637	1634
Aar2	360	270	380	468	402	163	452	175	280	154	227	302	556	357	168	392	153	220	282	336	401	579	573	359	251	280	381	427	407	379	330	405	311	335	300	363	278	272	327	431	263	813	451	406	217	464	218	184
Aars	2117	1963	2316	1888	1992	617	1662	774	1301	851	1031	1344	2262	1448	745	1335	652	832	1383	1473	1706	2426	1758	1413	1208	1475	1772	1619	1595	1482	1285	1556	1481	1583	1243	1438	1180	1490	1463	1447	966	2876	1758	2055	814	1776	964	827
Aars2	335	425	473	502	458	160	471	122	344	337	367	353	474	322	185	324	137	147	347	332	405	558	502	283	258	274	359	375	413	311	277	347	348	348	309	330	232	312	307	344	185	662	406	406	205	528	252	227
Aarsd1	509	514	594	592	582	184	510	226	502	519	462	448	646	347	188	297	187	224	342	371	509	763	674	391	293	391	446	519	450	435	328	370	363	452	359	400	304	336	383	414	265	950	512	575	269	604	311	288
Aasdh	220	174	173	216	231	89	198	117	205	277	142	162	310	163	97	228	100	132	143	138	226	328	284	97	116	155	169	191	187	195	174	165	141	178	134	139	130	163	169	274	133	441	234	224	135	215	100	77
Aasdhppt	419	330	507	327	499	149	449	178	318	260	215	309	519	360	169	275	141	176	279	399	441	531	460	252	279	373	465	457	436	459	359	373	379	383	339	359	292	318	334	441	245	845	497	535	229	510	242	241
Aass	11472	7600	10586	5022	6184	2084	10070	4887	5640	2445	3050	5279	12930	8183	4357	4393	2487	3272	5521	9058	9012	6518	8426	1438	6829	8549	10263	7629	6898	6148	6789	9268	7995	5151	5277	5923	7192	7250	8353	6607	3379	11542	9178	10364	4908	7535	3043	3118
Aatf	287	209	308	299	333	117	378	104	277	208	241	258	378	240	106	206	91	125	174	202	299	404	480	289	193	219	264	314	298	277	200	235	230	177	211	210	214	205	224	289	188	541	317	291	139	344	135	147
Aatk	58	43	52	103	81	15	118	37	66	102	115	77	100	46	40	80	55	52	54	84	89	172	131	70	26	37	16	65	76	72	29	47	30	86	48	94	65	60	47	59	35	168	72	88	44	91	54	51
Abat	6866	4941	6595	6068	6992	2489	6546	3357	5157	1557	2625	5001	8553	5722	2863	5973	2979	4006	3713	5489	5857	7676	7516	1370	3780	4742	5722	6587	6636	6572	4629	6191	5005	6021	5367	5934	5054	5544	5872	7082	4153	12103	6077	6168	2668	7447	2751	2783
Abca1	660	444	573	574	764	196	406	275	522	425	403	356	974	400	230	523	286	273	314	403	381	621	691	980	268	472	534	691	643	681	435	509	230	493	430	439	410	467	555	659	444	1264	591	518	212	632	226	187
Abca13	1992	1451	1832	2101	1975	724	2175	1263	1917	644	930	1998	4257	2699	1228	2577	1431	2212	1341	2621	2091	3974	3963	31	1100	1284	1548	2053	2163	1951	2450	2352	1849	2307	1854	2297	1881	2410	2210	4141	2079	6210	2329	2366	982	2912	824	837
Abca17	228	230	224	236	176	87	249	92	111	102	88	179	311	206	123	158	79	120	151	145	243	273	261	86	126	164	225	185	244	215	167	308	244	227	161	198	197	170	206	187	120	339	194	259	101	235	113	131
Abca2	1525	1697	1635	2086	1774	763	1659	858	1522	1353	1007	1044	2524	1633	828	2041	861	1167	1226	1401	1727	2725	2357	983	922	1164	1351	1337	1569	1566	1526	1730	1232	2159	951	1275	1128	1280	1303	2038	1228	3351	1431	1928	735	1587	918	742
Abca3	7437	7915	8704	7757	6050	2455	9034	4134	4217	1302	1439	5012	11787	7751	4108	6774	2997	3978	4942	6414	7885	8199	7549	2522	5112	6521	7125	5645	7076	6822	6214	11044	7725	7310	5389	5781	6080	7148	7176	6438	3784	11485	5984	8136	3367	5923	3039	2916
Abca4	174	137	164	263	245	78	211	75	170	82	91	115	235	183	82	272	111	174	106	125	199	332	212	42	115	153	138	188	195	203	154	177	83	209	110	127	114	149	149	303	195	494	157	150	87	213	90	52
Abca5	273	151	261	265	321	112	310	134	289	175	191	226	407	232	125	322	173	207	152	321	276	457	428	125	121	210	212	281	323	321	289	314	198	280	297	279	264	352	300	456	244	728	387	400	194	432	174	172
Abca7	299	379	408	566	494	165	480	124	506	589	458	374	570	375	225	475	246	286	342	383	333	895	653	597	192	249	230	365	502	421	412	415	277	636	320	398	276	357	381	556	346	1012	398	507	227	421	285	192
Abca8a	178	192	215	308	360	98	253	113	253	300	263	234	375	182	122	490	172	227	143	167	205	354	236	261	75	120	66	212	241	333	107	140	63	258	186	270	202	282	221	95	186	607	282	271	79	257	119	142
Abca8b	28	28	20	47	63	18	34	18	32	32	37	53	34	32	18	94	28	37	26	24	34	53	41	53	13	12	15	32	38	44	12	18	11	42	21	30	24	38	33	28	34	97	36	42	11	26	21	23
Abca9	100	111	149	196	198	54	136	68	140	158	162	126	304	151	84	288	111	150	128	188	176	299	194	315	49	76	51	113	142	172	91	95	54	190	128	135	151	188	170	111	137	391	165	218	61	156	91	62
Abcb10	586	521	735	751	744	273	690	274	473	329	339	449	912	562	304	509	253	333	467	568	654	885	734	399	446	522	643	632	675	635	499	624	551	588	481	560	513	513	615	649	385	1207	661	761	291	666	343	318
Abcb1a	133	118	115	401	366	109	454	138	381	229	235	497	321	256	132	391	208	226	153	296	231	444	643	318	96	96	101	438	439	456	376	475	138	374	530	417	339	342	354	549	344	957	307	194	234	631	239	156
Abcb1b	166	147	128	581	529	164	577	239	761	453	482	783	470	394	201	646	377	365	216	417	320	623	1112	337	113	127	101	800	736	693	575	668	232	771	964	799	517	567	542	951	532	1647	538	309	422	1129	291	254
Abcb6	938	799	933	969	916	301	900	296	541	339	376	526	1086	653	391	555	265	347	558	587	901	864	784	399	587	741	873	838	780	714	564	800	742	595	531	642	558	571	649	650	368	1192	714	855	482	839	399	374
Abcb7	1119	637	958	590	785	335	722	434	827	279	428	589	1231	833	417	705	346	504	434	1069	936	1010	905	431	565	754	863	743	748	882	828	879	742	741	541	564	752	808	903	907	506	1469	910	1075	461	823	407	384
Abcb8	902	985	1065	1148	1055	351	1121	413	667	564	624	746	1335	845	430	796	388	484	785	807	1118	1284	1165	519	663	762	1053	903	930	930	680	925	786	875	717	833	683	698	671	881	542	1769	997	1100	487	1079	605	481
Abcb9	139	152	168	247	282	73	156	66	123	153	124	159	211	128	69	153	69	118	149	124	165	315	232	147	91	124	143	177	189	152	110	130	117	190	151	172	111	107	100	187	113	302	161	177	91	251	114	107
Abcc1	376	288	371	644	569	237	408	202	450	335	354	346	595	446	195	580	260	317	289	373	383	826	626	551	193	241	243	468	529	530	434	342	272	647	311	356	367	376	388	755	442	1147	453	511	186	545	268	152
Abcc10	384	415	468	623	631	196	560	227	467	872	578	450	584	362	188	383	199	278	297	354	454	736	841	326	246	316	359	468	471	445	330	413	345	389	338	402	290	322	315	538	254	1044	470	477	265	647	322	299
Abcc2	5476	3973	5069	3033	3176	1196	5109	2724	3258	1441	1186	2725	6571	5214	2507	3086	1350	1829	2997	5220	4896	3687	4917	2023	2744	4055	4023	3427	4430	3609	4472	5638	3943	3246	3254	2594	4623	6659	5225	3895	2101	6061	4102	4653	1946	4034	1525	1679
Abcc4	553	409	612	2605	2445	958	4175	785	1869	791	917	3053	1237	2266	1082	2502	1269	1193	912	1348	836	2401	4664	1937	274	328	370	3888	4620	3620	3472	5661	978	1850	3463	2074	2960	3251	2434	3999	1774	6490	2336	1091	1353	3358	1322	1276
Abcc5	636	517	600	724	755	243	696	350	837	1022	782	566	893	664	315	685	379	450	507	713	664	1000	1122	776	314	428	461	609	692	738	724	747	449	655	471	506	572	706	656	840	575	1673	747	861	362	684	382	350
Abcc6	281	290	277	339	227	101	414	130	386	444	282	280	457	304	176	226	118	174	243	287	295	473	667	67	167	222	247	256	305	277	239	333	209	212	244	276	231	244	253	302	196	648	337	375	151	374	168	151
Abcc9	278	159	256	201	178	76	313	158	228	199	262	173	462	249	128	306	132	182	164	311	293	212	237	139	134	215	166	166	242	248	227	250	165	214	140	190	298	268	335	235	166	542	421	344	149	237	127	106
Abcd1	300	235	295	336	282	103	346	101	173	135	164	244	438	265	107	260	143	174	172	191	366	336	342	533	174	231	241	268	289	280	255	306	226	257	238	289	237	210	236	302	141	547	248	301	129	280	135	127
Abcd3	7859	4753	7366	5468	6236	2129	6114	2837	4144	1565	2244	4580	7878	5601	2854	4449	2521	3706	3421	5953	6049	6349	6850	2466	4541	5942	6557	6242	5682	5493	4711	5441	5316	7365	4182	5537	4744	6039	5827	5877	3306	10183	5638	6839	3419	6957	3938	2900
Abcd4	551	521	532	720	799	259	651	213	524	685	487	503	628	354	224	453	203	260	388	394	478	786	862	276	306	407	471	662	744	613	381	500	337	424	411	512	342	377	393	605	295	1093	659	633	279	721	317	309
Abce1	2033	1108	1665	1058	1510	514	1189	648	1057	600	777	811	1837	1254	623	1046	517	625	784	1318	1376	1719	1422	1104	966	1194	1354	1240	1241	1333	1104	1273	1211	1163	877	1017	1027	1212	1302	1295	847	2250	1291	1694	725	1225	698	562
Abcf1	1617	1395	1775	1618	1870	606	1615	685	1383	1418	1147	1330	1970	1236	635	1208	649	855	1024	1331	1640	2350	2040	1804	928	1143	1404	1436	1389	1355	1116	1302	1132	1310	1000	1278	939	1059	1107	1278	868	2494	1311	1571	734	1564	809	804
Abcf2	778	658	756	776	769	294	771	350	479	344	342	545	1050	666	310	600	323	409	523	619	739	1110	902	641	509	612	712	719	706	722	601	662	662	701	624	655	560	635	710	673	515	1301	719	887	393	750	376	345
Abcf3	767	587	760	929	966	302	940	323	693	657	572	649	1032	635	361	660	347	395	506	624	820	1253	1089	697	426	572	659	777	749	786	579	710	579	640	607	635	583	626	672	775	502	1437	766	812	443	913	481	428
Abcg1	117	130	184	259	306	71	131	58	159	184	203	90	425	225	109	207	105	133	258	177	158	383	209	673	93	142	124	191	260	218	263	117	68	215	130	122	175	172	258	317	184	571	199	262	43	159	102	78
Abcg2	7676	4821	7034	5187	6446	2172	6557	3066	4619	1936	2476	4106	8105	5867	2854	4272	2057	2620	3338	6001	6003	6621	6587	2057	4231	5885	6303	6341	5528	6130	4381	6324	5384	4601	4605	4539	5093	5341	5862	4913	3113	9253	6632	7279	2983	6428	3194	3031
Abhd10	191	136	187	163	209	75	173	85	195	149	146	148	239	175	79	155	71	108	116	174	179	245	254	113	110	127	119	206	195	173	150	135	135	169	128	121	126	147	115	151	111	323	230	191	92	188	91	89
Abhd11	683	724	784	870	786	286	753	305	624	788	713	597	979	521	277	501	280	347	492	563	710	978	1029	527	427	559	641	678	641	538	464	557	566	614	528	603	420	388	473	622	382	1249	664	727	363	915	558	439
Abhd11os	46	51	60	54	39	18	39	11	43	68	36	26	27	17	19	21	17	18	18	39	49	56	66	38	23	37	40	35	27	38	15	30	33	20	23	24	26	23	21	42	14	51	37	41	17	44	27	26
Abhd12	677	512	583	946	980	329	730	324	594	377	556	665	1033	564	333	681	390	461	458	522	738	1097	948	1162	418	523	614	750	735	769	547	598	565	911	635	720	458	506	566	887	518	1424	704	826	316	909	512	396
Abhd13	492	385	501	479	634	190	444	205	397	268	264	325	677	463	245	431	227	300	288	497	516	706	580	394	307	430	418	497	441	500	425	455	348	470	367	455	345	394	393	541	393	1051	520	595	289	584	279	259
Abhd14a	671	496	591	628	672	215	544	285	577	532	531	546	634	489	231	417	207	274	339	328	539	801	879	276	336	419	472	586	495	523	334	454	371	372	384	432	347	340	372	490	311	923	511	552	233	646	306	328
Abhd14b	5172	4150	5146	4666	5032	1920	4960	2178	4558	3569	4218	3491	6780	3648	2009	3654	1747	2127	3091	3956	5336	5790	5414	1340	3007	3882	4393	4214	4263	4013	3084	3603	3761	3583	3061	3615	2725	2818	3173	4121	2630	7862	4827	5347	2449	5377	2702	2393
Abhd15	45	44	49	44	30	11	27	19	22	27	19	39	61	51	20	40	20	28	42	30	36	83	61	158	28	45	44	41	49	42	54	39	40	49	36	38	26	65	53	51	36	87	38	48	16	42	24	17
Abhd16a	941	1131	1189	1556	1449	461	1337	452	1001	1008	1006	1154	1477	967	455	931	505	590	877	864	1133	1842	1704	902	573	771	868	1243	1265	1083	864	984	791	1203	995	1135	763	740	864	1153	738	2272	1175	1241	584	1425	785	657
Abhd17a	900	1393	1468	1720	1318	431	1350	469	985	749	1008	1078	1673	1008	523	877	428	577	1225	850	1432	1738	1652	1018	789	975	1135	1107	1167	974	855	1016	922	1077	909	1031	732	779	878	977	579	1998	1114	1248	573	1432	735	634
Abhd17b	648	414	629	515	626	171	453	221	401	378	333	362	652	432	190	422	243	282	269	503	483	655	602	380	311	464	510	510	473	568	425	465	508	593	447	514	349	408	523	566	341	1086	490	630	311	597	360	260
Abhd17c	2406	1766	2149	2946	3165	1074	2826	1253	2061	1165	1537	2219	3150	2005	981	1987	1107	1383	1476	1855	2460	3352	3268	1171	1322	1572	1947	2597	2418	2612	1810	2345	2104	2185	2201	2294	1466	1591	1827	2542	1612	4873	2471	2506	1390	3338	1639	1601
Abhd2	562	636	638	319	175	124	564	396	267	40	32	111	1367	754	499	822	331	421	412	860	558	504	296	140	350	395	306	152	283	351	893	1090	382	565	97	137	615	759	809	645	335	978	245	517	195	118	37	35
Abhd3	1826	1387	1918	1209	1465	415	1318	552	1062	485	597	995	1800	1162	567	847	458	641	844	1273	1424	1421	1405	334	1140	1537	1840	1298	1179	1266	846	1198	1149	1242	971	1064	925	979	1124	1135	621	2179	1429	1550	676	1530	830	785
Abhd4	1109	794	994	1367	1373	477	1048	432	937	613	743	878	1417	859	419	1027	467	583	684	850	949	1552	1556	956	613	770	882	1171	1189	1224	840	892	835	944	897	937	635	724	819	1112	714	2116	1052	1128	493	1205	670	508
Abhd5	996	563	904	619	765	236	704	244	506	246	342	442	765	606	283	483	252	289	357	561	660	783	632	451	483	668	698	631	586	640	421	585	538	529	466	526	430	478	472	549	338	1045	644	789	316	633	358	270
Abhd6	277	291	350	592	500	178	350	155	317	330	354	442	431	362	167	371	220	265	246	303	266	775	798	195	203	191	257	423	483	466	305	315	274	490	354	467	237	279	308	554	382	1015	363	407	200	634	297	271
Abhd8	146	207	208	410	352	117	257	79	230	161	222	249	304	201	98	262	109	157	198	185	258	448	373	383	110	139	150	280	278	239	188	207	195	291	218	262	154	176	190	228	154	472	234	249	108	341	151	175
Abi1	1165	652	1029	810	1065	308	1045	461	881	578	631	755	1136	852	391	853	423	483	543	883	1020	1155	1132	1199	608	737	807	806	858	962	779	863	793	806	702	778	664	816	873	977	660	1785	1057	1172	560	1094	569	440
Abi2	429	252	386	394	401	207	355	174	337	226	326	265	542	332	202	419	226	272	226	312	387	638	623	322	198	281	296	414	411	449	324	341	231	447	268	355	296	337	334	499	360	884	413	396	203	490	225	182
Abi3	44	86	72	151	110	41	103	41	88	253	214	91	153	87	35	92	48	62	75	59	83	225	171	256	33	48	40	85	113	80	84	70	38	109	72	88	50	66	59	74	48	175	85	115	45	99	75	58
Abi3bp	88	52	85	142	141	52	105	46	89	202	191	111	125	77	44	192	101	94	75	150	93	160	89	539	31	46	26	75	120	132	103	73	33	129	76	103	81	86	88	106	88	278	120	137	47	131	69	64
Abl1	922	922	1087	1324	1068	416	1111	439	904	869	888	786	1557	924	538	985	504	668	849	921	1088	1607	1322	1181	538	711	740	802	974	1053	851	900	717	964	721	817	779	864	807	1135	758	2094	1001	1035	450	1085	560	434
Abl2	431	330	489	355	444	138	381	152	308	254	248	233	534	373	194	342	174	203	233	390	401	548	404	416	244	309	339	407	354	425	385	403	315	381	238	238	299	346	374	361	304	702	378	466	203	375	220	199
Ablim1	1433	1114	1485	1397	1453	540	1376	677	1297	1095	1006	1055	1835	1359	606	1506	686	938	853	1337	1286	2222	1918	1414	749	1028	1096	1124	1278	1400	1279	1206	940	1612	919	1149	964	1213	1138	1802	1060	3021	1154	1530	659	1486	714	597
Ablim2	31	38	43	80	83	27	71	32	75	71	86	60	91	35	20	79	38	38	52	48	71	113	110	66	30	35	32	50	63	44	43	45	26	81	69	64	38	43	45	78	90	173	75	73	42	108	48	61
Ablim3	104	112	146	201	207	67	194	36	145	206	144	168	137	130	56	140	93	88	82	108	87	315	244	184	55	79	86	169	161	148	100	146	41	122	126	137	99	109	114	164	99	295	171	136	50	227	89	99
Abr	1066	914	999	1187	1187	466	971	487	938	926	938	921	1492	875	440	1251	580	774	647	913	1228	1788	1621	1246	643	837	914	887	1117	1141	821	865	801	1132	764	1051	697	766	789	1220	718	2444	886	1120	546	1160	609	508
Abracl	385	298	343	285	352	119	407	159	355	271	251	256	394	244	148	182	91	128	221	350	394	448	397	533	203	275	308	290	279	309	332	329	295	241	238	247	266	243	318	225	184	542	464	422	253	370	230	206
Abt1	227	168	226	292	289	80	223	95	153	175	153	156	232	154	93	156	83	96	128	183	218	331	332	243	93	156	169	213	198	202	143	180	132	145	150	158	129	121	151	207	136	413	233	193	117	189	133	121
Abtb1	441	472	512	550	511	151	590	194	473	572	508	421	586	406	202	341	176	234	395	352	520	560	676	388	302	383	369	415	449	433	348	429	368	364	352	357	296	299	309	447	257	839	537	543	272	651	315	268
Abtb2	271	402	369	412	346	144	424	150	254	92	131	273	398	326	150	254	114	165	236	283	382	477	381	251	206	280	233	324	402	315	230	283	258	330	244	324	229	267	304	318	167	561	280	355	139	375	172	172
Acaa1a	3047	3679	3883	4583	4008	1765	4873	1808	3717	3106	3668	3934	5586	3817	1735	2496	1514	2366	3033	3435	3933	5075	7226	2066	2197	2937	3742	4656	4341	3220	3061	3347	2839	3552	3284	4141	2946	3031	3279	3944	1984	7751	4362	3883	1838	5465	2398	2536
Acaa1b	4022	4813	5222	6561	5406	2518	7632	2407	5699	5216	5869	6173	7814	5855	2567	3344	2194	3682	4432	5273	5172	6739	10904	2356	2829	3708	4868	7143	6491	4417	4356	4543	3790	5357	4886	6269	4655	4662	4813	6023	2719	11978	6505	5337	2653	8770	3819	3888
Acaa2	2538	2331	2850	4709	4974	1688	4201	1638	3396	1986	2843	4824	3904	3037	1444	3554	1710	2679	2010	2791	2599	6132	7739	1195	1490	1834	2175	4796	3918	3589	2223	3018	1680	3715	3426	4248	2621	3198	2603	4375	2409	8953	3718	3717	1797	6039	3451	3228
Acaca	368	303	422	340	371	134	303	129	236	200	182	234	654	401	154	481	174	299	327	331	394	498	418	721	183	262	293	294	328	361	351	322	266	341	227	246	296	337	371	452	269	692	298	396	138	339	164	145
Acacb	383	417	425	799	579	213	549	201	513	324	325	402	814	653	283	855	310	572	375	430	448	881	842	175	207	291	270	454	590	534	536	495	326	682	310	434	418	476	385	902	478	1373	364	464	262	577	300	205
Acad10	1854	1810	1948	1752	1601	545	2021	817	1125	658	874	1275	2488	1497	790	1173	682	899	1273	1347	1877	1564	1560	374	1184	1509	1939	1333	1381	1461	1274	1583	1541	1336	1243	1390	1133	1239	1447	1454	848	2800	1554	1669	723	1665	759	629
Acad11	4020	2930	3921	3510	3677	1400	4779	2118	2943	958	1408	3154	5650	3876	1708	2992	1440	1867	2473	3638	3872	3906	4655	1074	2395	3040	3745	3797	3826	3564	3214	4308	3558	3623	3299	3688	3277	3643	3635	3658	2132	6214	4086	4491	2062	4076	1713	1882
Acad12	1006	901	1130	946	917	315	1097	412	654	275	462	755	1313	840	457	705	365	549	679	687	1075	1024	855	243	678	833	1104	759	823	909	736	882	809	855	767	850	683	667	741	878	534	1709	859	865	391	967	436	411
Acad8	1090	1106	1369	1197	1411	445	1459	512	958	631	674	953	1544	1107	572	880	419	632	781	1143	1376	1663	1548	538	836	1082	1219	1180	1125	1033	925	1058	995	1054	871	1030	903	964	1030	1208	732	2256	1289	1437	611	1534	718	671
Acad9	1819	1396	1856	1488	1418	519	1524	598	1194	697	935	1003	2072	1220	669	1101	593	831	1029	1432	1721	1815	1561	505	1126	1476	1733	1314	1171	1284	1039	1283	1424	1355	1031	1226	957	1015	1111	1376	847	2570	1346	1657	676	1632	857	672
Acadl	6235	4486	6340	4350	4900	1737	5560	2430	4631	3137	3586	3713	7465	4709	2363	3546	1957	2402	3005	4731	5743	5724	6170	2492	3376	4461	5348	4059	3915	3952	3675	4120	3731	3983	3087	4157	3269	3854	3683	4396	2596	8090	4974	5444	2819	5491	2569	2404
Acadm	19769	14705	18575	20691	25914	8192	14210	5554	14555	7792	11633	12763	18242	10741	5476	16349	7986	9511	8241	11980	14623	22368	14792	2759	11397	14906	17216	15785	15077	19052	7964	9354	10858	19578	10028	14151	7755	8564	8943	14956	11281	30487	11786	13430	6370	18703	15423	8801
Acads	2929	3071	3513	2384	2398	833	3217	1326	1990	1001	1472	1963	4154	2684	1313	1694	871	1158	2156	2258	3262	3021	3325	966	1859	2492	3359	2052	2008	1789	1943	2413	2357	2070	1799	2191	1770	1939	2095	1925	1173	3787	2595	2941	1179	2660	1200	1175
Acadsb	2771	1747	2398	2424	3101	1055	2519	1073	2239	999	1556	1886	3203	2192	1018	2377	1137	1545	1265	2378	2279	3408	3183	828	1479	1832	2126	2512	2486	2565	1943	2132	1814	2643	1836	2186	1698	1881	2058	2994	1755	5011	2242	2573	1276	2885	1291	1112
Acadvl	5095	4771	5988	5526	5656	1924	6334	1985	4355	2680	3305	4462	6986	4569	2330	3956	2005	2824	3503	4702	5598	6779	7198	2264	3263	3912	4909	4643	4756	4490	3942	4473	3888	4692	3684	4577	3481	3922	3797	4919	3001	9275	5152	5461	2963	5761	2972	2656
Acap2	589	348	537	513	640	195	569	263	523	472	433	365	796	479	291	628	301	388	323	564	521	839	743	616	300	397	366	438	562	636	508	533	337	563	357	435	456	501	486	673	449	1179	562	652	324	609	323	271
Acap3	154	138	169	260	251	92	179	86	209	254	234	192	203	160	72	174	86	114	138	179	174	356	323	339	91	130	115	183	198	201	146	151	116	208	151	164	108	121	130	218	128	413	205	210	84	252	151	125
Acat1	17103	12446	15866	6978	8075	2412	11390	5115	7231	2290	3552	5423	16822	9340	4775	4870	2827	3570	7059	10365	13486	8226	9164	1929	9287	12170	14047	6344	6309	6050	6463	8226	9629	5011	5041	5457	6991	7597	8139	6744	4052	12263	10342	12177	4729	7732	3617	3347
Acat2	2272	1821	2583	1545	1985	646	2282	1020	1561	1021	1115	1367	2744	1969	908	1240	623	805	1508	2129	2216	2473	2269	1135	1297	1736	2176	1591	1547	1774	1593	1926	2401	1588	1389	1680	1469	1669	1813	1792	1134	3063	2279	2957	1109	1924	1063	1177
Acat3	917	849	1159	679	760	259	966	469	637	283	373	641	1184	831	415	523	244	307	702	855	925	977	968	520	614	754	1028	720	711	762	756	962	1160	684	646	792	672	758	811	824	466	1315	1010	1257	440	830	414	508
Acbd3	666	512	760	674	835	234	695	296	583	598	495	488	854	516	311	593	325	420	444	677	704	1062	926	829	382	426	561	634	636	731	533	603	477	646	461	552	469	549	569	776	536	1471	643	733	370	787	345	320
Acbd4	1203	1207	1382	1271	1287	392	1463	523	1035	1136	1037	990	1771	1084	587	828	377	535	871	1028	1486	1551	1739	807	752	1059	1123	1122	1025	879	937	1066	973	881	941	1041	863	886	946	1058	624	1934	1420	1460	722	1467	678	761
Acbd5	2627	1478	2347	1373	1637	525	2217	978	1387	591	823	1167	2620	1742	904	1419	702	838	1132	2218	1898	1867	1927	806	1305	1786	1937	1702	1669	1807	1610	1973	1587	1528	1297	1293	1551	1726	1899	1913	1126	3014	2174	2373	1141	1869	885	747
Acbd6	433	464	436	612	502	170	522	207	410	433	448	440	658	374	178	358	185	231	376	350	498	663	734	434	267	248	333	421	436	399	328	383	332	357	328	363	252	307	298	374	252	794	447	401	262	574	273	261
Accs	196	108	136	184	177	54	181	78	185	165	152	117	233	135	57	135	45	82	113	125	168	200	225	124	97	124	115	157	142	131	113	118	100	168	114	119	89	116	93	170	95	321	180	178	69	232	110	80
Acd	321	309	324	423	436	123	388	162	301	245	229	308	418	259	133	256	133	159	239	215	307	468	505	330	172	217	295	367	304	283	251	286	248	282	241	310	202	185	210	299	179	547	299	351	200	349	184	192
Ace	5040	4088	5186	4135	2938	1014	3039	1282	2080	1384	2087	2084	5991	2939	1533	3672	2028	2479	2298	2759	4210	3461	1650	711	3142	4035	5835	2355	2873	2964	1858	2295	2601	4960	2111	3605	1919	2045	2323	3102	2187	6155	2368	3026	718	4340	1888	1263
Ace2	1346	840	1140	871	1009	304	1392	530	712	345	409	652	1369	873	563	693	274	377	611	1059	1349	946	1038	431	836	1032	1134	1019	896	985	877	1174	994	694	721	811	991	1005	1113	921	555	1543	1421	1378	603	1045	332	457
Acer2	191	199	290	312	337	146	413	174	376	586	597	361	408	342	213	644	269	325	196	386	409	911	861	1157	124	128	166	236	304	480	302	262	133	412	311	343	219	333	312	734	505	1414	302	592	186	383	293	227
Acer3	295	190	246	230	292	94	276	80	225	144	138	192	306	225	106	204	101	145	146	199	211	385	325	309	171	225	186	233	234	239	192	216	212	214	196	204	190	242	246	270	153	444	265	290	129	310	151	111
Ache	80	50	75	134	135	30	79	32	123	243	155	103	107	58	38	114	58	72	46	60	93	204	146	53	50	65	65	90	82	69	77	52	34	187	100	122	54	55	69	97	60	204	77	99	54	130	93	47
Acin1	1797	1976	2357	2448	2792	754	2614	1013	2410	3311	2296	2205	2713	1733	949	1954	990	1234	1483	1879	2335	3751	3566	3021	1238	1354	1555	1965	2055	1979	1743	1932	1424	1926	1524	1660	1533	1597	1695	2215	1419	4353	2109	2277	1227	2707	1245	1288
Ackr3	722	620	477	977	880	268	958	364	672	317	467	520	818	547	310	685	293	430	400	675	720	1010	653	968	321	490	497	881	641	786	739	655	518	1103	568	661	525	524	504	532	367	1168	797	822	505	1005	513	410
Acly	3019	2572	3275	3707	3862	1055	4589	1492	2624	1320	1835	3464	4583	3255	1622	3369	1733	2279	2485	3351	3498	4609	3950	3863	1773	2337	2654	2731	2930	3247	3126	4471	3528	3663	3815	3459	2519	2877	3102	3691	2389	6644	3925	4276	2185	4650	2421	2312
Acmsd	2098	1368	1993	1575	2402	821	1345	532	1162	360	509	1213	1046	1142	583	1546	659	639	691	969	1004	2032	1839	269	881	1213	1040	1889	1457	2177	815	1104	1270	1046	1114	1377	818	953	1084	1221	886	2355	1127	1445	587	1835	908	1010
Acnat1	1415	1017	1145	2537	3674	1367	2362	1126	2335	1426	1483	2373	2344	1408	917	2790	1486	1691	814	1723	1672	3924	3188	903	770	938	982	2489	2731	3447	1640	2600	1488	2964	2230	2521	1478	1648	1990	2834	1983	5263	2237	1822	1676	3308	1928	1846
Acnat2	901	1025	1115	1103	1661	523	2627	1412	1576	765	851	1736	2076	1551	958	1663	875	998	877	1523	1686	2368	2804	408	644	739	744	1033	1132	1362	1745	2661	1637	1480	1268	1708	1077	1667	1931	1021	922	2560	1881	1787	1540	1349	728	1005
Aco1	7919	7248	8226	7441	6419	2510	8067	3279	4826	1990	2698	4923	10373	5954	3149	4960	2375	2991	5139	6688	7063	7054	7175	2926	4835	6376	7574	6293	7120	6478	5345	6758	6122	5376	5415	5272	5203	5335	5825	6429	3417	11800	7246	7889	3591	6994	3079	3412
Aco2	16762	15061	17956	17031	16106	5753	16490	6412	10598	4792	7407	12090	20404	12619	6320	11643	5820	7565	10409	12617	15312	17708	17816	5020	10193	12220	15582	14111	15536	14275	10430	13288	12877	13118	11517	12355	9549	10726	11354	14464	8363	26166	14530	16453	7144	15495	8382	7381
Acot1	1729	1389	1643	2280	2133	781	2141	630	1465	768	1340	1655	1774	1454	670	1424	823	811	940	1195	1614	1872	2459	704	790	1092	1208	1802	1804	1458	1413	1247	1071	1489	1169	1949	1143	1802	1265	1437	870	2932	1596	1189	962	2161	804	765
Acot10	306	139	286	112	134	48	189	98	147	82	133	127	194	159	81	111	82	60	118	173	237	212	169	147	145	203	233	127	111	162	132	141	192	155	116	144	110	124	156	156	96	308	146	235	87	180	94	72
Acot11	420	452	646	366	400	126	705	224	289	243	211	297	819	390	270	398	175	260	327	355	397	443	522	216	291	358	569	282	287	299	366	593	407	264	229	362	246	418	369	347	241	716	430	530	250	331	184	146
Acot12	4368	2570	3897	1460	1653	522	3025	1376	1498	554	755	1137	4079	2461	1317	1228	710	696	1739	2493	2943	1379	1701	410	2218	2989	3409	1621	1611	1452	1831	2643	2540	1347	1044	1347	1866	2506	2332	1509	886	2864	2485	2918	1402	1739	809	744
Acot13	1524	1084	1400	1463	1652	599	1160	514	1516	1347	1377	1122	1528	960	485	1110	560	708	715	794	1088	2116	2015	458	734	974	1229	1369	1344	1411	695	821	945	1201	931	1074	709	700	845	1190	795	2370	1203	1324	652	1899	1205	938
Acot2	1358	1107	1327	1762	1778	607	1698	546	1169	728	1106	1425	1586	1137	559	1277	644	747	783	1078	1350	1608	2096	676	700	853	1001	1488	1419	1157	1124	1076	869	1213	962	1444	833	1373	961	1192	698	2325	1369	1052	752	1693	760	723
Acot3	389	442	419	1220	1261	463	701	324	850	530	713	885	658	581	230	844	433	656	318	401	474	1193	1300	248	176	287	323	1083	1027	820	502	491	350	1010	895	1198	519	591	493	1126	483	1653	718	446	357	1428	509	690
Acot4	837	740	855	1100	1042	435	1096	481	806	564	609	809	1226	965	432	874	438	605	542	818	1008	1493	1494	287	495	687	743	1101	1080	1009	830	1022	774	1177	832	988	817	931	936	1011	563	1878	1051	910	491	1210	525	599
Acot5	269	259	293	445	437	167	388	121	294	119	189	354	325	297	127	284	180	192	213	224	308	434	484	131	153	182	241	386	371	289	254	253	213	368	282	387	248	326	252	308	168	557	312	212	182	412	146	186
Acot6	195	220	223	344	333	105	322	91	197	94	107	272	287	241	121	217	106	162	186	145	221	386	391	109	136	185	206	289	343	250	209	268	191	265	272	301	207	272	250	281	149	478	268	185	144	327	143	163
Acot7	215	290	253	1148	1077	444	318	126	420	621	628	458	332	242	98	511	235	356	230	235	281	1127	571	395	146	167	203	675	677	689	222	237	228	976	366	553	171	152	209	449	344	1194	305	345	163	698	746	358
Acot8	303	359	319	509	499	146	401	136	368	342	336	342	434	296	142	312	160	167	231	251	310	594	578	211	184	247	333	361	376	326	240	287	213	363	308	337	218	230	257	357	219	742	360	375	177	530	283	188
Acot9	954	552	968	409	503	169	654	340	544	284	411	490	696	586	236	411	212	246	404	642	783	739	668	579	534	680	769	530	434	551	526	499	657	529	382	465	387	456	476	525	363	1074	567	824	346	617	313	274
Acox1	27521	20406	30331	9231	10880	3894	24229	9921	10676	5168	5589	8996	31443	19331	9777	8927	4797	5423	13010	20463	22964	11429	16679	4446	16072	21665	27620	9795	10562	10146	15129	18903	18480	9134	7632	9891	13510	17980	17775	10980	6510	19822	19162	23746	10516	11357	4824	4697
Acox2	1790	1403	1785	1741	1613	725	1360	724	1487	792	1163	1220	2036	1164	641	1405	682	721	861	1070	1483	1801	1687	494	998	1365	1561	1788	2109	1629	905	903	1114	1557	1271	1597	997	825	1097	1673	817	2698	1416	1434	615	1655	541	679
Acox3	5319	4047	5303	1774	2061	664	4917	2188	2004	1207	1178	1531	7345	3619	2020	1733	871	1103	2886	3897	4637	2484	2720	965	3009	4060	5044	1811	2018	1750	3041	4146	3957	1660	1541	1842	2854	3060	3485	1897	1031	3543	4258	5376	2107	1901	1010	947
Acp1	964	600	955	786	978	327	933	375	803	693	638	671	1008	721	341	623	340	428	470	746	919	1132	1165	767	558	729	805	883	854	827	633	776	761	770	631	697	562	607	667	797	547	1502	863	894	453	1066	491	459
Acp2	660	533	582	702	696	258	596	299	504	553	461	434	772	522	280	623	291	401	380	496	582	952	753	794	377	525	535	575	563	638	523	563	447	578	483	539	438	493	514	611	397	1194	602	686	337	748	419	323
Acp5	708	674	758	866	894	303	787	261	650	572	569	716	941	598	273	592	345	318	476	624	708	1133	1120	1055	426	506	608	668	705	602	535	686	624	652	626	640	439	393	507	586	347	1213	647	754	334	1085	493	556
Acp6	923	875	1073	967	1008	345	1018	424	962	971	898	687	1212	738	376	724	329	375	656	670	949	1063	1254	481	544	752	838	924	968	824	582	783	683	665	659	751	600	567	685	824	559	1662	970	1061	504	1169	602	545
Acpp	140	81	92	95	105	43	139	93	114	130	165	89	206	98	63	132	60	73	94	90	128	258	195	102	59	73	54	92	79	80	120	108	87	84	90	100	84	93	98	125	82	261	116	122	79	129	79	81
Acrbp	138	93	122	125	144	38	97	43	141	291	214	112	139	85	46	115	65	66	85	100	158	195	175	204	56	88	73	117	100	126	89	96	77	54	95	84	69	48	81	139	67	266	114	127	59	216	96	83
Acsf2	304	283	268	870	976	330	493	203	570	579	587	954	440	332	175	708	403	510	219	242	271	1196	1348	684	139	194	195	782	827	749	402	326	154	1014	790	1063	266	320	266	825	452	1644	415	448	181	1170	776	710
Acsf3	972	1058	1265	1120	1192	388	1260	460	789	517	768	926	1333	902	477	678	413	503	743	793	1092	1321	1264	412	667	864	962	951	998	863	739	915	772	819	703	871	643	717	801	851	509	1839	1115	1089	573	1274	623	614
Acsl1	4406	2886	3838	9362	11744	3494	5830	2082	6750	3519	3882	7938	5814	3902	2183	7886	4999	5180	2049	3055	3810	10359	11342	1904	1960	2650	2675	7965	7028	8640	3959	4409	2576	8546	5551	7512	3361	4921	4013	7778	5319	14344	4419	3116	3146	9608	5103	3894
Acsl3	579	297	589	516	542	175	405	166	350	227	214	346	577	391	176	291	151	220	321	409	417	564	501	233	239	330	412	472	503	457	323	294	323	315	327	275	333	400	420	470	290	790	370	437	225	484	183	267
Acsl4	780	466	726	761	997	331	753	295	711	419	476	758	1109	751	383	941	458	641	450	831	676	1184	1239	753	418	567	601	999	942	1019	782	822	619	1174	910	887	688	791	863	1304	768	2305	756	932	419	1203	570	473
Acsl5	1303	907	1153	1546	1665	562	1115	397	1173	733	1083	1263	1381	1069	460	1363	677	924	748	1001	1057	2199	1855	1848	758	886	1030	1485	1422	1373	1237	1028	966	1827	1117	1341	849	948	950	1629	1002	3039	1084	1277	626	1709	1133	772
Acsm1	2669	2217	2827	4394	5513	1774	1769	802	3195	2971	3233	3123	2383	1342	639	2993	1555	2365	1045	1295	1788	5884	4289	469	1717	2087	2631	3584	3434	3909	948	1318	1278	3514	2127	3243	1091	1118	1390	3666	2060	7096	1698	1904	491	4718	2904	2293
Acsm2	80522	61050	81444	17227	22911	8241	55129	26593	26399	9392	8022	13146	89458	49964	27558	16525	6638	9638	32538	55613	62872	26120	27320	2911	46224	61646	69013	19216	16415	17889	28277	40614	46219	6641	10388	11769	36444	40888	43751	16034	8953	29105	50001	64697	18983	17598	7637	9252
Acsm5	1772	1578	1811	1504	1592	546	1651	841	1185	966	982	1058	2117	1332	641	1036	559	838	856	1322	1784	1831	1657	150	1128	1529	1656	1364	1564	1637	806	1352	1404	955	835	1135	1126	1118	1210	1473	782	2733	1489	1751	571	1396	626	757
Acss1	2622	2697	3387	6031	7707	2147	3449	1496	3252	1401	1738	5039	3121	2611	1334	4374	2073	3024	1556	2185	2431	6904	7921	618	1885	2197	2633	6069	5839	5729	2192	2992	2003	4625	4240	5308	2543	2748	2640	5587	3244	9314	3194	3097	1391	6074	2775	2816
Acss2	5126	4186	5257	2854	3001	1046	5808	2463	2736	1331	1558	2088	6779	3865	2091	2042	978	1329	3513	4544	5653	2870	2947	1231	3277	4111	4669	2598	2676	2523	3115	4187	4165	2204	2054	2343	3597	3401	3824	2587	1506	4593	5144	5547	2524	3207	1320	1360
Acss3	61	64	87	107	97	40	48	38	95	18	11	102	114	61	32	159	51	109	35	68	40	153	179	30	35	46	65	93	78	109	50	82	46	140	87	71	62	77	70	141	80	204	38	63	38	93	47	31
Acta1	210	359	385	423	353	105	324	74	209	143	198	347	343	223	137	195	104	135	322	239	249	463	346	667	137	221	217	273	270	316	250	202	211	282	253	293	175	176	211	267	180	665	420	419	168	427	201	193
Acta2	652	651	993	1096	1071	404	774	343	973	1481	1291	830	1069	693	332	843	402	451	687	709	663	1685	1449	3300	341	469	518	890	851	781	531	504	434	823	770	669	452	496	629	853	592	1853	911	1089	452	1349	899	726
Actb	11642	11720	15325	14046	15574	5354	12297	5014	12946	14611	13412	12855	17316	10315	5302	11099	5721	6014	10242	10113	11776	23264	18934	38578	6513	8713	9999	12149	13781	13099	11181	9092	9141	12574	10717	11652	7662	8105	9506	11200	7752	23630	14035	14862	6475	16578	9541	8401
Actg1	12596	12191	18594	17597	16984	6030	14140	5550	12092	6279	8645	16175	19739	12779	6244	12102	5794	7400	9976	11929	13709	22305	19044	24737	8181	11041	14135	17814	18135	16210	12716	12021	11674	13730	12828	13040	9390	10198	11980	14310	8800	27690	15446	15405	7024	17822	8252	8794
Actl6a	617	626	768	560	610	229	628	241	505	270	360	457	851	485	248	381	227	220	485	640	664	728	601	551	393	546	600	521	562	521	474	601	501	439	405	464	426	487	470	461	345	997	630	780	331	618	360	310
Actn1	511	501	641	946	956	306	637	353	694	884	835	796	776	543	289	845	410	476	467	468	600	1387	931	2875	266	311	373	640	736	809	492	475	342	750	570	696	372	430	462	733	555	1519	601	741	317	864	541	427
Actn4	6051	6391	7624	8578	9012	2668	8437	2941	5796	5123	5804	7066	8867	6070	3152	6601	3235	4027	5123	5457	6666	10991	9464	7816	3732	4654	5191	6431	7362	7095	5237	6391	4886	6988	5985	6877	5111	5490	5608	7083	4534	14046	7207	7754	3435	8610	4441	3977
Actr10	1119	772	1002	953	1029	381	934	441	906	518	677	805	1233	779	408	776	365	542	559	846	1068	1324	1253	703	563	827	925	1027	999	1013	736	845	795	840	750	828	682	743	864	980	667	1890	1041	1141	536	1262	589	575
Actr1a	1500	1298	1570	1529	1666	542	1578	612	1207	808	871	1143	1867	1289	620	1124	621	773	1005	1329	1494	2052	1749	1894	896	1211	1381	1346	1282	1235	1093	1287	1186	1315	1025	1148	989	1165	1160	1204	822	2425	1491	1661	724	1532	847	757
Actr1b	1548	1548	1895	1878	1947	664	1731	631	1225	947	962	1324	2068	1378	681	1260	656	891	1168	1258	1715	2239	2172	1211	1069	1275	1508	1606	1691	1630	1127	1523	1343	1734	1340	1512	1164	1135	1337	1618	968	2985	1551	1740	822	1904	987	857
Actr2	3502	2006	3533	2676	3442	1115	3002	1284	2633	1677	1762	2245	3849	2587	1304	2479	1271	1673	1758	3120	2936	4089	3412	3549	2043	2795	2910	2835	2936	3053	2651	2746	2484	3259	2235	2568	2305	2445	2735	3156	1965	5798	3301	3894	1788	3567	1843	1683
Actr3	2955	1891	2815	2607	3086	964	2640	1112	2252	1403	1590	2071	3200	2137	1049	2012	1084	1303	1542	2472	2600	3647	3098	5154	1653	2042	2394	2686	2683	3011	2442	2333	2115	2569	2141	2253	1848	1920	2153	2705	1657	4984	3023	3114	1413	3215	1606	1494
Actr5	178	142	199	194	195	60	182	72	130	115	137	144	180	118	57	124	44	102	120	123	185	233	239	164	87	103	115	138	147	126	135	118	140	124	111	133	101	111	108	150	88	300	144	170	66	169	90	74
Actr6	151	96	210	120	149	54	149	78	106	136	83	126	167	138	74	97	59	53	72	103	155	157	212	79	79	113	142	102	120	125	128	147	95	126	133	132	93	130	160	179	106	298	161	214	105	130	80	82
Actr8	693	480	629	578	575	194	603	272	414	313	391	442	792	471	261	424	244	267	356	425	585	807	763	443	342	412	512	510	527	482	445	528	488	478	362	411	371	423	409	566	371	923	550	623	313	599	285	262
Acvr1	156	123	204	266	283	88	164	66	221	177	140	170	223	151	75	199	98	123	122	149	181	287	254	324	111	166	176	240	208	243	157	179	134	209	182	174	131	148	141	232	150	434	176	224	99	250	109	120
Acvr1b	686	571	735	809	754	262	677	237	509	219	279	509	956	556	323	553	259	415	448	533	634	863	751	307	439	536	573	664	712	655	615	639	531	747	548	562	557	590	597	845	431	1334	651	691	310	769	386	281
Acvr2a	398	235	439	351	481	153	385	202	394	235	254	261	575	353	205	451	222	264	214	418	394	464	536	261	208	276	305	357	362	476	313	338	247	374	254	288	281	355	383	526	324	940	393	457	221	376	197	176
Acvrl1	224	256	307	424	410	163	363	163	454	635	492	407	410	234	125	429	232	197	246	256	320	669	645	867	99	153	150	337	332	342	239	208	177	379	323	356	194	227	220	265	224	720	367	350	162	415	243	216
Acy1	1780	1522	1745	2696	2515	1324	1377	551	2140	2761	3016	1340	2169	1192	643	1896	777	1205	1002	1278	1706	3438	2474	317	1133	1363	1831	2561	2465	1980	817	971	1149	2412	1216	1930	976	810	1031	2108	1280	4209	1533	1535	689	2745	1483	1004
Acy3	37494	32571	41747	10085	9660	3401	26051	10580	12968	6079	7243	6503	35352	20220	12138	6934	3394	4696	18927	21880	33425	10440	8941	2195	23513	31548	35383	7155	6916	7273	13732	16105	22552	7546	4676	6860	14128	13526	18727	6861	4173	13855	19634	28094	10821	9849	6256	4274
Acyp1	116	130	196	183	249	63	200	52	139	102	123	158	164	115	70	118	58	75	93	129	148	217	244	116	99	108	148	150	163	187	120	146	127	161	114	138	123	121	118	162	86	318	231	228	92	232	118	138
Acyp2	314	261	362	284	353	104	370	105	300	231	223	267	322	217	79	166	98	163	174	341	332	336	236	125	216	278	298	272	308	307	196	292	248	257	212	237	226	209	220	253	171	536	358	393	199	349	204	193
Adal	365	172	349	155	185	77	202	178	195	88	100	105	312	249	134	163	70	86	158	247	277	271	194	115	163	219	310	159	135	186	184	234	221	157	122	159	146	205	205	206	101	299	205	267	102	159	108	80
Adam10	1555	915	1365	1211	1512	550	1140	494	1017	608	802	930	1759	1039	559	1240	628	803	669	1322	1207	1798	1439	1671	799	1056	1129	1281	1367	1390	1077	1263	983	1504	926	1036	962	1008	1095	1485	1004	2660	1320	1505	695	1464	800	616
Adam11	234	215	351	171	85	55	240	121	162	217	111	132	416	193	87	136	51	78	206	190	218	202	194	369	138	112	236	111	121	120	146	219	159	103	90	114	130	112	133	178	92	242	227	317	79	162	60	64
Adam12	71	49	62	97	93	27	31	26	74	82	80	46	73	43	19	101	71	35	28	41	47	69	41	216	16	30	24	39	53	106	30	32	23	58	32	30	39	48	54	17	28	91	49	52	15	58	35	21
Adam15	1124	1055	1324	1507	1149	526	1301	584	1113	1155	1126	986	1846	1063	526	1134	540	641	1050	1045	1491	1975	1604	1822	757	923	1046	972	1069	1023	933	1076	834	1247	793	1029	726	812	914	1124	654	2162	1177	1344	572	1330	788	633
Adam17	603	380	588	607	779	244	559	271	438	387	417	448	709	492	248	543	277	347	317	558	590	859	851	1062	289	396	434	516	566	640	459	484	344	572	406	441	417	461	466	643	406	1180	524	600	306	615	337	324
Adam19	45	73	83	119	100	29	76	14	81	85	79	41	73	61	32	62	78	45	41	75	55	129	76	578	24	56	26	44	41	76	96	32	20	93	43	38	47	51	50	58	47	126	72	42	17	60	43	38
Adam1a	141	90	121	150	172	48	141	77	174	142	139	93	225	120	62	170	66	104	100	123	105	283	160	65	61	90	89	115	169	171	109	111	71	147	82	110	83	143	102	211	140	410	146	122	89	188	103	75
Adam1b	59	52	64	77	72	22	62	38	78	61	52	43	88	43	31	78	34	48	44	50	36	131	68	28	27	53	52	49	85	76	44	40	27	60	48	42	43	65	55	93	54	199	52	53	29	87	34	31
Adam22	108	40	86	103	159	41	97	36	117	105	99	98	128	107	39	134	52	81	61	80	105	204	141	86	43	56	55	95	110	117	92	76	53	114	80	93	64	89	103	115	86	260	93	135	44	134	76	60
Adam9	2442	1638	2517	2030	2226	726	2201	918	1469	740	926	1580	2548	1739	932	1730	846	1101	1201	1837	2073	2589	2236	1279	1443	1711	2102	1802	1983	2050	1626	2100	1798	2260	1748	1962	1519	1807	1911	2068	1324	3811	2133	2696	1122	2353	1089	1061
Adamts1	788	630	905	1224	1294	376	726	346	846	760	663	801	889	538	338	763	341	386	552	713	634	1351	839	2340	322	604	536	599	752	1105	639	548	636	1111	671	655	507	562	637	944	779	1674	865	850	451	832	573	337
Adamts10	285	390	381	523	582	138	335	115	459	1055	686	379	414	254	146	322	219	208	303	213	311	578	493	866	136	191	143	335	426	359	250	205	121	359	281	264	247	252	278	256	218	813	370	329	135	458	300	225
Adamts15	542	350	278	286	266	80	292	152	238	126	158	117	471	248	165	177	101	88	219	269	273	232	216	162	376	317	387	101	146	187	314	346	312	136	85	106	200	337	244	102	120	278	363	369	105	136	108	76
Adamts2	58	57	71	115	120	43	81	30	69	127	98	82	91	70	34	116	40	54	81	48	61	109	84	760	17	35	23	67	70	78	59	38	35	121	58	75	52	62	63	51	42	152	68	100	23	81	49	25
Adamts5	437	298	409	482	701	197	368	151	482	881	671	344	451	297	185	501	160	225	235	378	271	794	551	743	175	202	177	431	441	461	215	223	159	445	407	342	292	344	324	282	232	717	531	510	139	472	382	376
Adamts7	41	85	88	141	134	37	84	27	62	115	100	79	78	45	26	88	39	51	63	62	81	120	95	168	33	32	26	48	97	88	28	27	20	68	44	56	42	43	47	32	37	152	72	71	16	90	62	39
Adamts9	267	170	244	214	317	86	244	124	214	182	155	206	274	187	107	315	119	167	136	190	214	323	266	265	110	164	144	163	185	259	139	223	160	216	141	190	173	153	207	164	130	379	219	275	130	210	119	108
Adamtsl1	67	58	80	100	101	40	75	28	90	99	92	64	109	70	38	118	51	65	67	79	99	130	81	345	42	37	38	60	92	86	61	50	25	88	48	61	59	81	71	57	58	170	76	100	39	101	57	27
Adamtsl2	151	217	270	490	674	174	370	149	378	834	624	586	308	258	160	600	270	209	200	252	297	820	609	773	88	114	89	201	255	429	195	310	142	413	292	478	144	205	223	178	207	741	243	312	244	373	327	282
Adamtsl4	32	58	85	89	144	38	97	41	74	232	175	110	89	52	29	136	55	49	51	63	83	148	150	479	30	37	19	55	71	129	44	47	32	82	71	83	45	50	46	51	50	181	76	108	48	89	68	54
Adamtsl5	30	30	39	67	81	16	106	31	67	206	191	78	83	51	28	64	33	41	48	31	55	101	117	301	20	30	16	40	38	42	41	38	38	86	76	47	26	23	39	48	37	105	86	73	35	98	78	52
Adap1	410	439	535	656	516	203	529	165	383	404	308	407	708	497	196	359	175	209	395	374	471	814	767	571	287	375	414	555	635	393	382	358	362	498	418	432	311	339	340	536	264	965	555	651	269	552	275	282
Adap2	493	380	566	434	544	182	629	229	402	289	274	352	712	474	235	427	192	259	269	422	448	583	517	538	262	340	361	325	382	349	330	425	379	392	274	343	362	441	427	293	188	589	442	558	207	375	177	223
Adar	549	384	511	726	701	228	574	273	517	606	543	421	744	463	269	600	302	380	387	550	482	994	776	1223	296	384	398	505	609	607	784	522	391	698	390	564	436	489	422	696	457	1209	574	579	270	648	370	263
Adarb1	169	159	222	184	196	71	226	119	162	186	175	170	325	160	103	222	131	131	138	214	195	402	303	264	88	131	150	135	165	179	159	195	122	192	117	191	116	185	164	196	134	394	195	214	110	149	99	92
Adat1	63	52	96	80	87	31	92	40	74	45	49	67	136	71	39	66	39	39	74	89	106	108	148	79	44	56	42	91	75	89	55	76	44	61	75	63	63	64	67	91	65	168	74	90	49	83	46	47
Adat2	50	52	59	57	53	23	67	40	47	17	30	43	78	69	25	63	25	30	37	34	44	96	56	61	39	60	57	41	57	63	48	48	42	52	45	59	36	48	49	62	44	107	69	79	28	62	18	28
Adat3	31	31	33	53	60	20	47	23	23	45	28	19	58	31	18	40	14	13	48	26	27	43	38	43	17	26	27	25	27	31	40	34	21	31	26	27	25	15	25	44	18	69	24	41	13	32	14	24
Adck1	302	267	274	390	385	163	343	105	333	180	252	282	396	265	134	267	141	201	250	223	268	471	406	209	197	255	281	369	350	317	254	244	242	297	256	299	222	231	251	334	199	622	296	367	153	387	230	154
Adck2	293	256	285	438	427	114	379	124	256	296	261	361	358	280	164	324	148	229	180	264	276	470	536	248	190	209	219	304	317	345	255	298	235	387	223	307	201	275	216	362	211	685	358	304	129	442	204	195
Adck3	2794	2261	2272	3543	2701	1315	3178	1031	2617	1104	1517	2554	3912	2021	1135	2220	1031	1286	1852	1895	2295	3210	3726	683	1606	1927	2206	3605	3640	2722	1933	2800	2219	2189	2677	2260	2006	1729	1978	2745	1529	5600	3132	2461	1173	4538	1560	1822
Adck4	264	419	430	539	504	114	387	143	304	309	268	361	502	320	153	316	155	182	294	278	378	548	547	364	254	302	294	334	378	286	289	322	307	338	295	341	223	250	239	310	176	623	379	394	184	463	223	220
Adck5	281	439	436	558	549	175	523	172	452	706	493	417	435	319	166	347	140	192	349	346	523	619	666	339	301	342	360	464	505	475	348	360	384	338	354	406	292	294	265	497	275	892	474	514	266	591	280	311
Adcy1	198	180	194	308	269	133	278	145	280	158	190	179	403	298	133	335	174	220	174	275	283	553	408	158	118	155	153	224	255	280	274	246	177	370	152	186	205	232	203	408	258	645	292	292	212	281	150	89
Adcy3	37	36	37	98	73	38	58	32	67	52	46	47	55	38	20	105	36	38	33	35	53	102	71	137	15	29	13	46	65	75	33	39	20	88	56	56	45	48	42	47	42	126	61	43	21	60	75	32
Adcy4	77	107	139	218	216	66	155	66	176	263	274	123	190	103	48	162	102	83	99	80	135	349	266	240	68	67	82	136	178	164	78	93	81	201	131	113	87	109	125	174	103	254	165	158	91	166	140	89
Adcy5	87	102	69	142	113	40	118	55	95	59	67	100	155	111	60	123	81	85	78	81	84	158	166	119	38	61	43	96	122	98	58	102	35	106	63	90	68	69	88	124	65	245	87	114	44	112	67	46
Adcy6	1926	2412	2586	3950	3756	1233	3329	1094	3082	4298	3030	2679	3762	2539	1409	3427	1633	2244	2023	2306	2751	6070	5454	1802	1367	1813	1733	2821	3357	3136	2483	2810	1680	3567	2253	2592	2276	2378	2379	4410	2515	8458	2732	3071	1694	3791	1864	1528
Adcy7	81	48	56	97	62	34	97	48	105	155	124	91	141	82	42	119	54	73	68	111	83	232	124	1200	22	46	46	41	52	71	219	62	33	129	68	75	88	89	79	128	75	200	123	108	33	86	51	60
Adcy9	439	408	478	427	466	185	398	167	413	221	237	292	590	411	252	488	179	243	267	397	402	694	492	300	256	377	375	355	425	485	333	442	273	413	324	333	371	409	409	481	331	817	384	482	167	451	236	230
Adcyap1r1	69	31	26	51	44	25	35	37	62	39	41	33	68	51	23	94	21	41	41	47	52	69	48	78	13	22	15	46	47	49	26	26	12	88	26	52	34	40	35	46	32	117	44	70	20	58	36	23
Add1	2371	1996	2607	2588	2718	870	2888	1224	1918	1307	1413	1906	3145	2095	1029	2103	1101	1254	1764	2043	2462	3352	3060	2951	1503	1865	2091	2098	2204	2187	1958	2304	1794	2190	1792	2003	1670	1727	1953	2317	1459	4155	2339	2659	1232	2683	1315	1069
Add3	1687	1293	1840	1845	2221	756	1966	996	1349	700	700	1516	2349	1651	923	1867	968	1237	952	1620	1842	2838	2588	998	904	1314	1400	1895	1725	1902	1302	1915	1391	1898	1524	1848	1496	1631	1683	1843	1172	3342	1724	1931	792	1877	979	892
Adgra2	1259	1152	1450	1347	1429	517	1256	597	1016	564	753	1011	1806	1285	552	1254	611	763	836	1103	1430	1958	1451	592	793	1032	1152	1160	1218	1284	961	1274	1016	1588	1090	1225	936	1042	1094	1389	831	2423	1071	1208	567	1507	724	633
Adgra3	364	487	387	991	889	294	518	229	606	646	542	656	590	362	214	692	334	376	347	328	493	1283	886	635	233	357	249	547	621	738	268	432	241	816	626	668	414	419	369	519	389	1148	548	485	218	799	440	463
Adgre1	38	43	38	83	104	20	80	37	74	57	34	130	100	53	27	98	56	48	63	138	126	250	105	1232	18	22	26	47	41	53	98	74	28	136	96	85	51	48	45	79	56	124	123	101	17	89	43	52
Adgre5	683	498	601	567	667	196	710	354	577	731	611	506	976	572	295	647	349	331	528	625	718	1055	727	1795	355	494	565	457	580	516	533	627	513	648	519	561	462	481	505	569	355	1103	687	742	269	655	405	319
Adgrf5	1183	982	1293	1690	1843	674	1294	637	1439	1583	1538	1135	2127	1274	800	2085	938	1221	886	1203	1262	3273	2909	1181	619	839	807	1320	1581	1806	1016	1142	602	1580	1054	1213	1172	1352	1194	2272	1593	4252	1277	1615	773	1673	1170	674
Adgrg1	3939	4167	4785	7144	6090	1968	5732	2358	4416	2267	2923	4535	8021	4059	2163	5286	2754	3273	3773	3894	5101	7251	6857	7470	2707	3319	3941	5275	5417	5633	4775	5096	4213	5499	4183	4239	3007	3145	3467	5865	3789	9973	4691	5238	3384	5676	2837	2075
Adgrg3	112	72	102	158	207	49	182	43	161	415	196	153	151	72	58	172	161	64	48	73	152	283	223	300	41	58	65	112	98	128	112	116	57	141	96	134	59	53	65	140	115	390	113	137	87	220	116	109
Adgrg6	31	29	46	41	60	24	51	34	58	83	92	59	67	48	44	110	33	72	39	51	40	115	86	349	18	35	27	42	59	67	70	37	33	75	41	42	48	75	61	103	69	203	52	95	35	67	54	36
Adgrl1	608	817	824	708	776	231	819	328	688	909	659	496	1106	737	377	644	262	405	564	735	656	965	909	608	398	602	571	507	582	576	521	685	485	606	442	430	522	625	674	632	390	1222	708	957	367	650	372	301
Adgrl2	904	627	895	609	714	280	618	360	573	434	361	384	1013	662	301	568	254	310	432	688	833	1000	751	478	471	623	565	479	618	652	501	710	596	693	411	384	604	612	660	767	418	1210	657	740	302	685	355	288
Adgrl4	632	411	694	942	1087	291	695	290	894	733	776	606	867	597	323	1069	508	563	444	770	705	1875	1366	751	292	416	330	759	869	1000	420	520	317	1182	616	767	545	587	657	980	719	1778	955	862	366	899	671	400
Adh1	10342	8174	11032	1733	1536	588	7856	3511	3527	1098	1213	1332	10109	5472	3317	1366	592	727	5526	6119	9155	1845	1897	2671	6215	8124	8923	1614	1425	1460	4857	6490	8419	849	1078	1061	3675	4698	4971	1641	1052	3172	6174	9181	3286	1829	599	926
Adh5	3371	2886	3745	2587	2689	840	3221	1231	2485	1372	1848	2010	3782	2408	1212	1681	857	1115	2094	2782	3193	3199	3279	1434	2306	2752	3225	2495	2364	2187	1966	2357	2515	1956	1733	2017	1983	1980	2273	2341	1389	4821	3375	3617	1529	3035	1497	1474
Adhfe1	5522	3742	5070	3781	4437	1437	4014	2014	3328	1921	2374	2693	5884	3513	1769	2706	1514	1918	2447	3648	4175	4013	4085	523	3253	4233	4976	3767	3457	3775	2697	2984	3553	3127	2559	2979	2654	2726	3242	3461	2069	6191	3803	4217	1796	4194	1804	1706
Adi1	1073	645	1010	813	1074	342	853	374	878	628	643	698	1230	715	378	704	354	428	519	860	768	1248	1112	461	466	735	895	922	909	843	606	716	589	685	642	703	554	593	667	896	520	1721	891	1020	418	1068	570	570
Adipor1	2323	2020	2702	2504	2474	867	2354	1067	1759	950	1410	1896	3103	2012	974	1801	945	1206	1721	1937	2551	2993	2900	1922	1567	1985	2358	2133	2169	2169	1852	2065	2058	2253	1835	2053	1484	1694	1795	2288	1307	4257	2376	2714	1177	2701	1398	1212
Adipor2	1637	1303	1752	1466	1812	572	1458	686	1262	621	846	1156	1980	1433	752	1340	698	860	965	1329	1596	2278	1762	1478	984	1289	1524	1345	1497	1585	1171	1512	1385	1698	1231	1394	1165	1209	1365	1654	1096	2937	1482	1767	851	1629	924	825
Adk	2357	1582	2235	1894	2327	817	2511	1112	2150	1261	1518	1824	2971	2087	1043	1542	854	1147	1368	2236	2553	2575	3014	859	1454	1965	2072	2562	2267	2356	1915	2460	2008	1850	1929	1953	1803	1994	2091	2276	1481	4139	2786	2750	1457	2935	1148	1280
Adm	112	132	211	186	253	84	132	53	142	312	242	141	145	91	46	91	37	68	71	34	69	262	282	183	55	81	110	136	160	158	111	102	92	141	100	122	63	91	82	116	81	279	153	141	72	217	126	143
Adnp2	307	184	268	271	262	99	292	93	222	110	108	183	325	252	100	309	139	184	176	229	242	352	333	283	136	192	190	257	240	286	253	252	209	270	172	203	169	228	199	315	220	522	220	318	143	266	128	109
Ado	423	346	433	532	527	187	483	199	374	200	288	366	602	440	189	416	213	283	349	413	426	601	500	574	305	352	398	476	394	443	418	435	349	469	348	386	322	335	356	494	284	782	425	523	254	536	231	220
Adora1	104	64	66	189	110	25	101	36	71	142	103	61	231	138	63	158	53	87	153	92	124	151	140	186	46	68	56	117	132	133	168	74	66	150	73	78	100	92	106	237	177	417	115	216	53	80	48	29
Adora2a	42	81	70	129	89	33	68	29	78	75	64	57	133	60	34	93	50	54	99	65	91	125	60	290	25	52	46	71	89	90	87	46	36	110	36	57	74	74	57	84	61	203	90	104	34	107	58	38
Adora2b	33	39	31	64	82	26	39	19	45	36	32	41	56	42	20	33	28	36	28	46	50	71	57	61	12	19	39	62	59	63	42	32	25	43	49	58	16	29	37	42	35	96	37	42	25	54	30	26
Adpgk	324	206	279	315	335	105	281	150	280	206	205	240	367	245	113	260	123	141	171	257	314	422	326	319	195	216	281	250	305	310	242	257	248	300	215	262	170	196	243	253	172	514	257	307	149	297	173	137
Adprh	273	249	290	449	422	138	345	115	376	309	353	322	341	251	118	278	145	161	230	261	323	552	471	579	149	184	226	359	373	360	238	215	187	317	291	304	223	198	209	361	219	637	332	335	169	439	252	220
Adprhl2	263	357	376	509	434	146	424	104	333	335	352	345	415	309	138	282	138	186	304	262	378	557	516	434	212	248	305	371	373	305	286	354	257	291	249	270	221	242	257	342	201	706	350	344	197	429	258	224
Adprm	250	225	281	209	254	67	309	126	195	176	199	195	300	211	100	173	104	134	168	208	227	297	388	193	156	186	223	222	237	232	211	261	220	207	195	176	205	212	234	240	125	522	283	334	130	287	123	96
Adra1a	152	154	207	159	210	96	254	59	115	64	46	158	273	183	90	220	77	158	101	141	178	324	316	39	112	107	141	177	164	179	145	228	137	135	161	210	131	198	179	184	112	394	169	204	84	172	83	109
Adra2b	2377	2186	3411	1991	2949	1028	3119	922	2232	1623	1547	2665	3703	2317	1104	1867	923	1039	1329	2130	2851	3319	5099	1798	1452	1771	2552	2053	1936	2068	2319	3241	1903	2301	2625	2287	2123	2318	2358	2734	1875	5276	3416	3831	1340	2957	1344	1559
Adrb1	42	43	55	111	88	34	87	34	71	62	57	94	65	57	24	86	44	57	31	79	77	178	176	49	27	43	34	74	52	41	86	40	52	117	88	116	34	40	39	106	50	172	72	42	32	153	80	48
Adrb2	147	154	238	64	52	21	90	64	109	76	53	30	212	99	52	33	27	32	80	64	185	95	101	131	121	150	214	51	42	67	68	101	120	27	32	52	61	92	102	54	31	87	116	134	65	47	20	23
Adrbk1	931	826	1128	1191	1244	433	1063	478	853	1040	880	947	1289	904	428	758	433	548	724	801	998	1773	1466	2505	552	666	868	1014	979	1037	1005	917	771	980	826	912	727	736	799	952	641	1956	979	1056	500	1166	644	550
Adrbk2	169	110	178	216	334	72	227	83	255	471	263	169	240	163	97	215	136	150	93	146	182	447	381	429	83	94	111	191	190	206	173	208	109	217	166	140	143	184	134	280	185	562	176	166	100	268	160	125
Adrm1	1517	1749	2141	1672	1569	473	1677	608	1079	961	1080	1246	2101	1212	687	818	448	566	1323	1285	1692	1871	1638	1314	939	1216	1480	1186	1199	1078	1000	1111	1203	1038	952	1060	839	990	1089	913	575	2165	1583	1592	745	1348	785	762
Adsl	705	515	658	773	776	249	628	267	602	433	446	519	832	509	253	539	253	367	376	461	621	888	885	469	377	420	562	665	673	639	461	532	414	482	488	567	383	423	492	632	377	1237	620	680	329	698	376	368
Adss	1811	1074	1943	1434	1809	551	1670	723	1230	813	729	1124	2025	1261	694	1213	666	744	897	1558	1620	1864	1727	1328	1066	1445	1518	1575	1610	1729	1251	1414	1236	1434	1204	1288	1201	1281	1369	1580	1099	2755	1685	1789	864	1738	917	770
Adssl1	78	97	134	207	191	69	175	46	167	95	138	147	169	108	60	147	82	86	98	82	136	241	162	109	71	58	68	126	191	125	92	79	75	141	108	139	103	89	97	185	122	321	158	119	51	236	110	77
Adtrp	1451	916	1247	1019	1351	524	1429	663	1460	1197	1437	1134	1784	1109	560	975	552	668	677	1274	1452	1827	2030	469	626	901	1034	1036	962	1039	943	1096	1039	1179	928	1256	954	1018	1029	1199	773	2409	1449	1389	803	1753	846	911
Aebp1	1092	996	1139	2210	1985	655	1581	560	1593	1675	1471	1793	1813	1046	638	1808	955	1145	942	925	1401	2559	2552	4929	533	676	664	1593	1743	1690	831	941	702	1601	1425	1644	1088	1128	1238	1494	1016	3468	1520	1381	574	2422	987	954
Aebp2	964	835	1384	1042	1298	365	1105	410	886	619	671	914	1255	853	486	905	461	583	633	964	1069	1589	1333	1237	585	797	924	1094	1027	1063	860	930	778	1116	731	956	772	824	915	1230	811	2168	1129	1252	562	1232	657	556
Aen	344	339	397	385	442	122	436	130	276	351	344	306	399	290	124	262	136	161	267	309	381	602	540	558	230	279	297	293	307	297	341	321	378	364	281	392	234	267	252	310	234	666	384	463	219	458	240	235
Aes	6967	7672	8849	10979	10450	3586	9267	3435	8468	9259	9056	8186	10212	7215	3514	6833	3738	4474	6292	5856	8731	15875	15260	6372	4477	5335	6216	7498	7579	6819	5507	7323	6523	8875	7392	8227	5317	5432	5876	8900	5215	18023	8966	9328	4310	12738	6533	6460
Afap1	607	428	507	635	676	234	509	296	675	615	564	484	956	403	300	688	289	423	416	563	489	946	780	727	277	412	537	590	583	695	444	499	314	617	401	465	338	400	404	738	433	1370	580	584	232	754	336	343
Afap1l1	816	616	764	715	689	267	557	181	574	554	597	412	805	465	244	557	292	363	476	604	623	895	683	321	536	659	679	608	661	571	462	491	648	559	407	393	368	420	474	627	339	1173	636	752	282	772	371	329
Afap1l2	317	337	321	539	488	156	246	114	398	469	414	298	419	188	113	353	130	202	248	185	253	643	473	484	157	212	247	329	422	380	177	166	150	453	302	331	220	219	247	409	223	771	386	313	138	578	303	211
Aff1	1238	1160	1757	1384	1523	551	1803	903	1324	713	858	1176	2577	1503	1005	2009	924	1177	889	1453	1631	2534	2230	1441	811	1140	1319	1405	1354	1779	1500	1990	920	1701	982	1187	1183	1438	1453	1996	1286	3701	1340	1846	808	1476	772	596
Aff4	1591	999	1494	1235	1568	526	1295	657	1158	536	787	973	2010	1271	702	1377	619	887	814	1497	1383	1845	1710	1338	824	1168	1183	1318	1331	1477	1286	1329	1000	1383	1023	1128	1140	1310	1357	1622	1163	2910	1388	1613	743	1407	734	589
Afg3l1	1438	1414	1936	1564	1639	494	1721	616	971	656	860	1152	1904	1276	635	1013	571	708	953	1216	1693	1839	1618	874	1025	1208	1611	1320	1333	1244	1050	1313	1240	1355	957	1236	955	1065	1143	1296	780	2280	1439	1569	721	1567	799	730
Afg3l2	1987	1787	2330	2162	2526	833	2267	828	1728	1141	1277	1743	2680	1772	882	1594	803	1061	1248	1782	2079	2771	2475	1057	1363	1814	2055	2008	2240	2075	1475	1805	1722	1838	1574	1739	1409	1488	1636	2030	1175	3706	1888	2209	1087	2412	1250	1032
Afm	595	408	602	1013	996	371	622	306	806	812	743	640	537	465	229	702	386	501	312	452	481	1085	1219	127	368	406	536	1073	1124	1039	441	554	423	881	639	888	463	385	457	1092	693	1811	639	554	311	1163	417	520
Afmid	1394	1266	1536	762	942	305	1319	596	888	787	730	707	1469	985	535	543	334	341	876	961	1248	1028	1286	349	861	987	1211	875	903	840	762	1070	998	561	736	649	723	729	853	767	430	1582	1134	1285	534	1062	389	526
Aftph	1535	1211	1712	1504	1678	622	1703	791	1380	688	784	1117	2291	1526	761	1373	624	992	985	1462	1642	2176	1782	1161	997	1505	1395	1702	1480	1624	1331	1632	1285	1614	1167	1382	1213	1403	1415	1666	1052	2871	1568	1699	877	1839	870	758
Aga	459	438	534	516	626	167	522	217	489	328	313	431	665	428	248	416	201	279	327	434	493	723	628	209	357	428	541	534	466	519	336	452	407	462	397	469	354	389	409	463	299	993	551	647	286	676	342	269
Agap1	1630	1304	1569	1371	1424	489	1494	667	1077	534	745	1046	1936	1203	701	1146	554	609	883	1222	1340	1728	1487	887	819	1062	1245	1195	1204	1163	1010	1264	1141	1118	882	1069	896	1072	1073	1148	748	2195	1348	1516	734	1440	649	597
Agap3	539	686	783	897	945	287	906	267	678	834	805	707	911	538	311	552	306	359	607	588	725	1157	1020	1168	389	486	511	680	685	602	544	618	525	693	555	637	445	478	577	678	439	1330	698	782	337	854	512	397
Agbl3	171	145	217	226	204	73	230	101	161	99	128	148	300	214	104	204	77	133	172	198	223	270	238	92	130	157	192	201	194	207	170	202	180	209	145	192	164	159	189	252	118	432	253	259	115	273	132	96
Agbl5	390	392	387	492	540	135	475	222	430	497	321	362	587	354	178	430	168	273	295	347	450	600	660	281	242	297	305	454	411	387	320	419	295	403	319	331	311	329	336	425	299	863	433	394	215	542	270	177
Agfg1	645	476	659	614	704	204	586	284	472	262	276	401	791	574	251	474	287	310	362	593	655	726	622	720	353	528	532	559	526	583	500	590	525	581	449	525	451	563	576	558	381	1081	557	781	330	588	386	227
Agfg2	558	512	639	696	756	254	706	215	524	408	370	674	838	588	348	606	280	400	499	522	656	958	1094	423	315	443	572	702	725	576	547	744	478	610	572	658	550	620	634	853	441	1489	705	790	310	895	413	366
Aggf1	746	606	742	819	840	306	859	368	671	448	420	545	924	645	353	647	370	429	499	662	835	1142	1070	804	423	548	624	754	703	734	606	678	547	719	562	645	533	587	599	837	493	1509	792	841	398	895	451	437
Agk	280	252	352	363	390	122	311	133	256	210	178	258	358	254	127	252	146	157	192	287	332	377	358	231	197	244	233	352	320	340	248	296	244	291	260	274	218	227	219	323	206	596	303	366	150	370	168	185
Agl	1030	831	996	1029	996	378	1029	473	836	353	436	634	1513	1029	505	962	398	582	597	1026	809	1398	1152	434	574	784	805	918	1047	1021	872	1150	808	873	634	728	840	951	971	1183	641	1951	965	1019	493	1007	457	417
Ago1	650	631	759	784	823	317	866	370	726	452	509	593	1134	764	424	922	408	538	485	767	681	1145	1102	812	430	584	551	663	717	825	801	992	543	846	551	613	702	747	690	1037	583	1700	729	797	367	802	408	380
Ago2	197	163	197	135	145	73	185	111	118	55	74	134	314	190	127	242	103	129	114	190	206	230	243	143	81	106	147	123	127	160	222	239	132	174	105	105	155	203	231	200	137	401	176	249	83	128	80	59
Ago3	39	48	42	38	46	19	36	19	75	75	44	20	82	54	29	55	16	41	36	72	40	87	66	53	26	38	30	38	41	37	42	36	38	42	23	35	33	41	55	50	30	103	35	64	25	50	21	26
Ago4	59	68	82	104	141	50	87	44	104	86	139	97	104	82	48	104	46	82	45	91	79	214	167	137	36	58	54	100	107	110	79	81	66	115	70	66	65	95	67	142	76	310	115	87	38	147	71	45
Agpat1	1366	1319	1547	1574	1618	524	1470	636	1117	1221	1188	1235	1918	1158	635	1133	556	741	985	1061	1521	2116	1854	1268	801	1044	1260	1349	1299	1296	1015	1127	1158	1164	1053	1168	794	919	979	1239	779	2293	1336	1495	716	1614	845	838
Agpat2	335	364	379	448	401	167	505	167	414	288	413	431	769	448	218	411	172	285	405	388	559	650	488	543	246	322	347	384	406	345	420	504	433	450	404	347	315	341	399	530	272	815	487	511	258	616	282	232
Agpat3	5673	5088	6019	5698	5019	1780	5564	2080	3837	2331	2786	4109	7275	4737	2403	4328	2200	2818	3370	3802	5456	6332	6153	2150	3595	4237	5215	4605	4986	4612	3740	5091	4454	5144	3961	4508	3512	3816	4230	4775	2819	8644	4707	5076	2491	5618	2667	2229
Agpat4	72	46	52	74	137	27	58	17	87	128	119	64	55	38	24	57	23	40	40	20	45	132	111	235	21	41	37	78	86	66	47	48	22	92	68	70	31	36	44	55	41	138	83	68	28	61	68	39
Agpat5	325	244	382	410	478	147	326	152	247	176	170	280	400	291	133	325	150	200	227	276	354	531	448	270	234	269	298	404	371	401	236	285	252	332	311	322	253	252	273	354	217	699	320	369	188	385	207	201
Agpat6	1257	1075	1274	1459	1362	470	1333	489	990	597	631	1044	1569	1093	631	1130	578	747	756	990	1306	1785	1694	1252	738	988	1137	1311	1131	1258	971	1258	963	1317	1032	1201	922	990	1051	1319	816	2509	1179	1375	600	1357	680	653
Agpat9	193	132	152	324	478	154	245	129	290	299	216	435	201	198	77	457	166	209	117	182	150	663	889	161	89	129	121	347	360	463	214	247	118	590	337	524	189	207	222	473	333	866	326	320	103	546	178	244
Agps	6938	4168	6867	1303	1890	511	3254	1930	1388	475	697	649	5702	3101	1802	1412	817	1018	2307	4231	5163	1412	1204	871	4439	6018	6506	1215	1492	1986	2221	3046	4392	1176	687	966	2296	2718	3168	1584	1075	2994	2747	4970	1467	1319	637	495
Agrn	2390	2768	2860	3684	3106	1191	3239	1319	3054	3333	2466	2029	4105	2690	1469	3187	1573	2057	2246	2834	3142	4673	3754	5668	1482	1942	1893	2009	2566	2568	2971	2707	1821	3332	1576	1969	2113	2384	2301	3436	2086	6205	2346	3306	1385	2568	1357	1095
Agt	570	503	564	1106	862	355	711	322	924	968	1195	713	923	530	262	890	470	544	427	488	780	1382	941	479	345	418	518	741	818	847	479	456	518	1176	531	843	441	381	511	816	589	1699	765	693	549	1115	663	355
Agtpbp1	513	316	487	522	562	221	430	258	467	401	340	369	730	442	263	593	271	348	295	446	432	757	566	354	304	383	376	459	451	542	415	419	393	599	351	446	336	411	390	615	395	1010	462	537	291	527	288	228
Agtr1a	869	513	721	873	905	326	837	383	702	777	719	705	982	699	340	799	342	424	454	601	826	1211	948	425	442	597	520	766	748	892	463	688	538	711	697	703	580	586	686	677	466	1266	870	747	320	946	520	462
Agtrap	1385	1272	1644	1604	1780	543	1622	594	1095	702	926	1146	1800	1121	618	1074	571	658	965	1148	1541	1944	1674	704	918	1228	1429	1211	1294	1288	969	1305	1124	1354	975	1193	959	1059	1064	1299	866	2420	1377	1516	663	1578	900	703
Agxt2	1548	1288	1771	1247	1556	568	1972	853	1016	670	597	787	2166	1631	752	857	401	465	992	1678	1600	1333	1564	321	1012	1351	1497	1347	1345	1182	1294	1717	1242	827	919	958	1453	1452	1535	1177	654	2062	2004	1807	780	1332	542	667
Ahctf1	618	443	734	565	675	248	652	398	560	540	405	415	997	594	344	633	312	398	408	738	585	927	829	679	366	464	542	614	547	615	583	627	410	588	400	495	469	588	579	622	472	1259	600	631	368	643	325	280
Ahcy	8063	7514	8459	6365	6105	2035	6905	3004	5099	2968	3877	4636	9171	5087	2830	4003	2028	2417	4705	5551	7353	6272	7863	1895	5523	6463	8302	7073	7109	5794	4352	5655	6279	4632	4876	5430	4537	4709	5382	5549	3233	10821	7094	7519	3527	6997	2747	2956
Ahcyl1	4916	3277	4951	3850	4429	1480	4571	2141	3688	1997	2096	3019	6556	4131	2003	3683	1826	2278	2764	4620	4746	5658	4834	2126	2725	3636	4130	3649	4104	4255	3728	4763	4079	4551	3314	3527	3177	3615	3908	4593	2801	7697	4308	5223	2706	4745	2344	2116
Ahcyl2	6891	4695	6491	4481	4799	1899	6993	3152	4036	1613	1837	3747	8480	6100	3053	4615	2174	2800	3751	6056	6416	6259	6564	2008	3844	4809	5345	4082	4250	4727	5117	7344	6071	4795	3940	4093	4765	5317	5623	5107	3124	8832	5961	7458	3082	5151	2335	2712
Ahdc1	547	642	891	930	954	327	866	242	616	667	533	699	974	638	344	774	406	466	616	584	741	1191	1087	875	359	416	516	740	714	649	581	679	444	728	628	667	485	482	565	669	476	1439	715	839	407	863	419	393
Ahi1	209	175	191	228	291	83	219	128	251	231	182	172	324	201	115	246	114	173	137	226	240	364	362	138	107	122	181	208	226	254	188	223	169	265	188	194	160	218	230	279	180	487	209	235	129	265	119	97
Ahnak	1107	1044	1360	2108	2404	762	1645	747	2014	1881	1862	1408	2652	1658	846	2668	1163	1556	1201	1849	1454	3705	2546	5410	666	948	870	1687	1888	1955	1708	1586	882	2109	1224	1329	1351	1622	1587	2605	1739	4820	1833	1935	760	2162	1160	844
Ahr	129	123	156	200	241	69	94	54	120	106	81	92	161	123	58	174	84	125	94	106	129	229	174	300	68	108	108	142	148	188	165	109	117	184	109	88	131	104	119	199	143	356	148	139	70	158	91	69
Ahsa1	1257	1132	1552	1056	1396	433	1290	524	1003	710	890	1029	1367	868	519	910	485	592	714	1075	1375	1817	1562	1445	737	982	1212	1074	973	1152	826	1027	910	914	778	956	718	822	969	923	633	1937	1177	1393	839	1270	697	606
Ahsa2	253	207	325	187	281	73	295	158	249	187	207	212	324	192	110	190	128	124	111	242	294	407	276	334	162	213	274	169	193	213	135	233	200	235	171	209	161	177	226	174	134	441	243	273	161	243	142	138
AI314180	1453	923	1403	1115	1377	474	1213	706	1125	751	812	767	2012	1286	605	1216	561	772	779	1413	1187	1642	1567	1033	780	1029	1092	1169	1208	1308	1190	1276	951	1171	877	866	1038	1234	1277	1451	910	2624	1271	1372	589	1208	657	539
AI314278	1198	779	1121	994	1178	407	1244	587	1200	977	1113	974	1296	932	473	847	438	582	578	807	981	1593	1540	308	549	762	791	953	935	1198	821	1123	934	872	913	982	696	804	804	952	648	2085	1150	1051	677	1385	603	576
AI317395	3435	2566	3404	2694	2718	810	3692	1413	2210	1128	1379	2240	4084	2916	1537	2057	1111	1316	1833	3040	3608	2921	3001	1315	2136	2781	3312	3026	2850	2799	2712	3804	2883	2961	2825	2669	2490	2750	3003	2540	1462	4884	3190	3411	1865	3652	1514	1537
AI413582	71	109	126	208	174	56	128	28	142	184	171	131	176	100	53	82	40	55	98	81	107	237	219	294	68	80	97	120	130	101	120	78	77	118	94	134	57	65	70	112	66	268	122	147	77	164	106	59
AI414108	33	27	23	43	50	23	36	18	39	76	54	35	46	42	16	52	14	47	37	23	45	78	85	95	11	31	21	31	39	58	38	28	45	57	29	31	25	28	27	73	47	106	42	53	37	58	41	13
AI464131	878	725	1031	885	822	252	805	283	522	265	308	521	1147	669	372	624	254	319	489	601	712	776	770	286	643	750	929	648	770	696	617	835	676	766	555	616	494	590	576	576	373	1075	738	825	371	741	370	325
AI507597	46	45	75	58	64	19	68	12	49	91	77	64	79	54	22	22	16	16	43	59	97	83	120	42	16	53	58	38	48	42	64	47	40	32	28	37	41	41	39	57	44	112	78	79	35	67	38	39
AI597479	263	147	259	243	293	88	210	90	218	193	169	155	308	201	92	221	104	160	137	213	184	361	328	289	105	180	192	245	252	299	182	211	146	263	187	218	200	175	219	289	222	581	256	288	119	332	172	129
AI607873	46	38	38	69	58	14	58	71	151	290	218	125	105	83	28	137	58	58	40	101	95	331	171	986	19	32	29	44	51	79	132	71	46	135	87	107	44	71	60	120	78	214	114	146	29	83	75	55
AI661453	353	342	347	687	573	227	427	127	295	157	227	394	569	406	190	494	227	380	366	329	430	774	633	353	175	246	276	474	489	398	361	308	305	523	303	434	236	295	288	593	316	956	357	444	212	483	259	180
AI837181	408	434	490	665	647	207	593	165	360	429	490	495	547	354	207	369	201	251	393	362	427	756	750	660	284	290	324	514	463	424	380	426	349	428	370	416	284	306	308	429	298	930	482	454	242	645	304	319
AI846148	240	197	222	274	270	66	234	60	208	236	205	192	200	148	66	167	98	82	161	151	185	346	318	278	124	150	157	198	188	198	106	150	145	220	164	171	137	132	124	167	122	345	200	237	89	315	151	127
AI854703	577	360	410	523	478	180	525	212	448	373	303	287	636	375	174	357	184	284	320	353	472	577	599	184	362	458	363	585	506	479	321	354	467	399	297	471	326	293	357	451	250	849	554	508	284	576	198	213
AI987944	279	134	213	201	314	94	248	109	258	171	198	205	297	183	106	206	113	164	136	229	192	283	337	266	124	175	170	266	210	240	213	231	167	230	198	209	172	178	221	277	178	478	242	287	120	334	173	133
Aida	371	233	332	409	459	144	379	170	338	292	267	376	521	324	142	359	185	218	202	339	329	594	527	763	151	237	240	380	351	391	379	319	236	378	308	365	302	284	316	465	281	718	410	431	180	463	224	206
Aif1l	2331	2084	2632	3953	4224	1445	2814	981	2908	1974	2539	2900	3355	2435	1159	2961	1546	2008	1767	2348	2452	6189	4945	1248	1430	1674	2024	3461	3610	3564	2339	2306	2046	3909	2841	3156	1691	1951	1917	4098	2501	7480	2636	3365	1593	4156	2361	2095
Aifm1	2983	2239	3166	2487	2836	896	2918	1159	2239	1097	1381	1808	3078	2191	1053	1632	883	1115	1559	2292	2642	3127	2954	997	1802	2112	2423	2610	2397	2366	1713	2152	2034	2046	1783	1938	1732	1865	2041	2338	1500	4398	2584	2920	1317	2823	1424	1307
Aifm2	278	236	265	405	364	109	327	81	246	244	249	286	317	221	127	278	129	268	178	247	261	540	394	323	147	182	214	273	298	258	225	225	180	393	222	323	154	186	182	360	211	633	236	278	141	392	230	192
Aifm3	373	398	409	267	228	91	332	109	213	167	175	157	494	259	158	151	78	87	227	230	366	269	251	102	236	311	338	186	232	206	178	252	266	143	146	174	206	194	207	175	61	319	278	345	127	270	94	120
Aig1	359	291	362	378	396	126	336	143	224	78	223	275	516	266	110	281	182	173	230	277	351	460	368	167	198	264	348	332	317	331	248	259	285	321	276	280	219	243	261	340	205	641	330	320	174	367	171	140
Aim1	369	337	549	241	294	105	373	153	251	203	164	180	640	377	199	258	137	198	240	359	382	324	348	495	261	375	344	275	263	307	475	404	255	258	175	190	306	373	357	370	224	617	350	389	147	304	104	101
Aimp1	348	346	449	466	539	161	459	182	514	377	364	354	582	344	192	348	182	216	284	290	473	700	651	503	285	324	408	478	394	433	330	386	286	363	329	349	303	304	362	446	269	905	432	502	271	576	272	272
Aimp2	193	223	257	297	286	101	260	103	224	193	262	230	266	205	104	177	97	123	160	152	244	380	310	299	112	160	212	214	256	227	151	213	194	181	199	177	147	156	182	214	134	511	240	317	107	275	140	170
Aip	468	563	592	778	758	225	790	225	547	599	670	577	686	397	225	454	248	302	442	463	597	892	866	819	332	348	469	623	544	558	470	543	480	505	442	522	413	387	413	520	333	1134	633	659	294	726	387	377
Ajuba	414	576	718	857	786	228	686	194	454	430	512	456	747	593	274	608	237	324	507	487	601	1133	892	1492	281	397	466	571	531	521	487	598	433	648	457	496	438	466	499	632	459	1331	575	745	326	666	372	320
Ak1	298	296	326	584	601	182	341	137	386	284	352	301	394	324	140	357	182	241	286	261	343	810	631	257	183	259	254	432	485	376	232	220	246	450	282	308	230	245	271	484	286	806	401	362	164	482	315	223
Ak2	2774	2417	2819	2431	2447	760	2965	862	2062	1829	1760	1751	3138	1895	988	1568	724	986	1724	1950	2520	3114	3189	1884	1611	1948	2196	2195	2201	1933	1727	1957	1887	1668	1736	1745	1643	1619	1672	2154	1264	4147	2622	2900	1368	2817	1343	1438
Ak3	4096	2939	4115	3499	4103	1593	3673	1729	3067	1770	2300	2858	4718	3217	1590	2982	1507	1988	2093	3313	3574	4875	4749	1576	2511	3246	3775	4096	4209	4111	2875	3382	3168	3539	3145	3433	2656	2802	3091	3971	2290	6898	3781	4040	1981	4464	2262	2158
Ak4	4976	4370	5574	4680	5349	1868	6404	3744	4295	2461	3130	4247	6870	5415	2384	3884	2071	3497	3419	6545	6519	6745	5714	1631	3496	4642	5793	4798	4955	5205	3444	5362	4444	5260	4208	5541	3895	3614	4173	5069	3032	9133	5350	7722	3133	5891	3319	3108
Ak5	71	53	59	78	93	15	63	29	72	71	51	62	65	33	39	63	19	35	29	48	62	66	52	109	20	15	18	41	52	57	18	19	21	61	43	55	44	44	56	17	24	76	58	39	17	69	33	32
Ak6	242	171	222	175	255	72	215	62	198	121	126	129	214	139	86	125	77	90	102	156	215	247	264	127	133	149	185	175	180	148	137	162	139	126	120	161	134	138	157	164	117	333	195	250	118	237	94	126
Akap1	1955	1599	2070	2013	2120	635	2057	769	1457	809	878	1285	2504	1443	803	1381	698	913	1107	1362	1788	2018	2219	954	1182	1498	1700	1553	1634	1504	1296	1574	1446	1667	1088	1498	1175	1378	1284	1660	1007	2732	1689	1902	976	1842	1002	798
Akap10	442	316	504	370	509	150	406	236	327	213	214	323	525	367	172	393	186	245	213	426	367	577	562	375	265	372	431	397	380	501	308	374	276	406	317	382	300	292	325	401	261	820	388	449	245	440	236	221
Akap11	1173	658	1171	892	1109	355	1103	566	893	479	550	723	1643	973	507	963	460	615	647	1098	1113	1360	1342	693	570	837	897	947	953	1101	846	1043	875	942	714	778	920	1033	979	1162	759	2102	1134	1305	556	1158	596	470
Akap12	256	231	377	421	394	150	475	212	456	472	500	317	433	303	147	677	305	277	215	320	323	740	643	3364	98	140	121	262	352	465	257	242	127	435	217	291	236	287	254	527	347	1134	358	500	201	327	175	130
Akap13	861	702	1031	788	989	310	1037	552	884	765	682	763	1279	812	486	923	456	570	611	903	912	1329	1131	1804	482	662	723	649	802	922	870	923	699	839	667	746	634	744	819	922	603	1631	898	910	422	943	488	431
Akap17b	110	62	77	116	155	41	82	44	124	201	157	89	101	71	30	94	47	58	55	96	73	232	169	75	43	63	70	110	116	118	91	73	57	134	74	89	55	59	80	157	71	247	64	69	42	138	90	74
Akap7	205	126	180	292	361	128	258	131	299	252	235	223	292	209	107	260	136	172	155	220	242	350	379	173	121	163	142	289	241	313	191	232	151	256	240	242	204	215	215	327	193	606	275	267	111	346	155	180
Akap8	1237	967	1379	1276	1631	519	1536	597	1492	1903	1268	1021	1835	1240	625	1276	655	785	851	1334	1424	2227	2129	1585	716	928	973	1348	1277	1342	1215	1247	895	1219	968	1051	1088	1113	1226	1654	1095	3144	1468	1486	778	1655	891	705
Akap8l	681	723	842	1003	1058	345	1016	360	1076	1858	1198	790	1140	651	403	768	432	504	573	670	898	1367	1590	1072	489	548	626	810	829	817	718	707	564	779	658	674	578	630	634	1028	616	1820	866	846	481	1216	643	567
Akap9	1074	852	1051	815	967	344	995	491	880	663	612	679	1588	959	521	875	451	530	657	1002	1016	1234	1042	741	549	822	797	686	789	904	917	907	681	819	570	647	757	813	790	960	629	1706	939	1076	481	872	430	365
Akip1	311	293	350	271	250	81	334	106	218	170	200	178	374	188	107	149	77	85	211	235	275	227	290	109	193	263	263	246	210	199	172	236	228	150	125	169	178	169	195	234	111	456	290	278	139	261	115	129
Akirin1	684	467	668	591	658	215	465	259	410	233	320	415	812	535	221	469	244	323	399	520	597	835	717	741	363	518	563	624	543	584	498	471	465	589	437	490	438	496	519	565	382	1096	538	696	300	602	350	285
Akirin2	758	730	937	817	838	257	866	394	679	576	495	588	902	699	303	572	289	307	553	635	974	1054	996	697	440	541	591	563	554	571	498	577	612	538	480	557	480	561	586	602	431	1322	744	753	368	778	389	361
Akna	59	62	79	118	97	26	96	40	84	174	159	105	102	80	39	114	58	66	87	92	122	268	131	1196	33	39	24	58	86	85	238	90	46	137	87	98	69	68	73	107	88	197	117	129	30	111	57	60
Akr1a1	29613	24671	32040	23652	27089	9125	29574	11600	20272	10785	13297	19944	30335	23589	11167	16335	8118	9958	16025	20229	25854	30585	33343	12004	18254	22871	26491	26097	22392	20857	16635	22941	19885	18206	18568	20907	18487	20191	20741	20425	12488	38340	26114	28607	11207	29130	12508	14805
Akr1b10	379	401	532	499	511	178	402	218	415	366	357	361	468	343	175	352	145	197	267	356	391	618	557	309	270	351	442	387	427	447	378	382	301	319	318	342	228	236	279	382	268	693	406	436	198	495	244	230
Akr1b8	38	28	40	47	38	16	34	26	23	36	39	41	62	49	38	57	26	36	42	46	44	85	57	312	20	34	38	34	43	44	91	24	38	48	31	39	34	49	50	88	57	161	52	61	28	45	25	24
Akr1c12	68	77	93	131	106	54	175	73	176	65	119	179	191	110	42	132	87	91	109	136	145	174	306	268	47	62	65	251	224	210	172	179	116	208	254	214	117	109	101	304	134	515	173	142	101	309	62	133
Akr1c13	166	122	153	241	187	93	381	140	282	84	151	217	351	226	90	202	106	127	231	277	249	221	404	433	121	126	129	338	298	278	355	328	237	283	329	291	233	240	256	434	196	726	409	328	233	367	80	146
Akr1c14	4883	2751	4110	1524	2218	576	1664	1057	1024	147	223	130	3617	1612	901	513	441	256	1648	2967	3773	616	138	25	2975	3897	4839	1279	1119	1935	1109	1211	2737	583	109	218	1167	1293	1649	523	563	966	1930	2799	770	443	880	126
Akr1c19	192	158	201	488	466	152	289	122	361	141	291	417	306	234	114	337	206	211	156	280	239	609	689	325	109	153	162	631	544	555	276	315	228	484	491	486	223	260	260	578	349	993	306	282	177	655	246	264
Akr1c21	17807	11551	15422	7890	10104	3845	18427	9467	11005	3827	4819	6584	20856	15251	7053	6560	2990	3567	10572	15608	16087	11425	12116	3309	9772	12504	13616	9272	7809	7931	11972	14304	14324	5179	7464	6917	12336	12071	14353	7947	4489	13826	18736	19207	6929	10523	2986	6156
Akr1d1	861	581	661	469	621	265	703	401	467	198	240	218	1005	537	242	380	165	206	393	737	667	473	347	60	424	603	595	572	429	575	479	574	761	305	311	296	550	492	613	385	294	797	896	947	431	464	314	230
Akr1e1	1134	729	1093	891	1091	381	1052	481	977	505	722	800	1353	933	453	777	417	430	651	919	1079	1196	1377	559	623	863	878	1006	901	926	740	959	751	787	798	788	759	672	917	937	604	1679	1208	1193	611	1262	591	605
Akr7a5	4567	5899	6075	5455	4643	1682	5438	2174	3970	2607	3333	3831	6718	4082	2222	3110	1534	2082	3904	3827	5942	5940	6203	1784	3471	4393	5147	4274	4162	3772	3010	4028	4068	3579	3280	3735	3009	3101	3597	3562	2206	7413	4617	5104	2208	5196	2604	2706
Akt1	1157	1308	1521	1886	1938	621	1701	613	1246	1076	1246	1505	1919	1182	615	1295	687	757	1140	1156	1425	2407	2054	2569	814	943	1010	1356	1428	1320	1084	1186	1064	1504	1217	1345	963	994	1056	1474	834	3034	1429	1462	712	1774	1007	842
Akt1s1	940	1193	1270	1272	1159	355	1435	431	936	844	890	960	1387	843	486	685	385	472	894	838	1234	1525	1401	1000	710	827	1003	911	989	818	698	947	849	787	789	825	729	692	798	890	534	1639	1178	1127	600	1188	642	626
Akt2	1504	1472	1776	1726	1819	526	1789	622	1190	868	881	1347	1974	1254	719	1256	558	778	1121	1379	1567	2066	1880	1643	960	1205	1555	1528	1626	1490	1245	1484	1290	1327	1253	1358	980	1102	1311	1386	887	2897	1610	1727	814	1907	962	880
Akt3	82	69	110	146	223	64	103	76	127	124	129	133	188	99	72	217	81	108	73	94	81	314	251	308	59	79	58	129	137	181	132	104	49	181	103	122	97	115	116	233	147	383	148	155	66	176	104	72
Aktip	2254	1361	1882	2071	2157	650	1919	933	1734	881	1348	1367	2398	1551	750	1806	872	1181	1132	1781	1853	2701	2282	1035	1151	1417	1601	1857	1914	1983	1357	1613	1393	2265	1389	1700	1157	1340	1436	2132	1390	3890	1938	2206	1210	2307	1358	906
Alad	1292	1221	1280	1710	1649	559	1522	671	1409	1267	1118	1201	2045	1156	624	1235	593	759	1004	1202	1347	2103	2273	853	721	940	1127	1469	1442	1361	920	1133	933	1171	1130	1276	963	940	1056	1399	843	2818	1319	1446	619	1686	748	922
Alas1	1491	2093	3265	2802	4216	1689	3306	1900	2356	2250	2479	4801	4110	2162	1416	3361	1675	1370	1852	2434	3056	5111	8104	2443	1056	1752	3421	1796	2823	4418	1615	3201	1537	2278	2694	3309	1680	1936	2448	4254	3318	8398	3270	3838	1655	2017	1833	1859
Alas2	86	110	83	147	129	49	133	65	248	307	376	144	199	128	99	167	60	97	112	178	177	259	297	16	59	79	148	95	183	132	92	136	140	234	130	171	107	88	103	248	142	315	167	164	66	249	197	110
Alb	118	70	353	472	151	104	228	207	258	133	188	679	174	153	56	267	119	139	172	1331	487	1081	579	93	88	194	112	320	302	332	162	222	135	376	2022	372	203	178	177	431	229	745	214	226	121	493	111	1505
Alcam	573	360	615	474	537	196	581	217	514	376	377	457	716	528	226	541	275	331	269	480	413	809	767	1134	256	290	358	471	552	511	659	709	517	607	436	439	446	656	631	610	446	1079	553	625	360	715	301	299
Aldh16a1	1040	1165	1246	1484	1317	439	1271	425	1059	1094	1147	1165	1563	1004	520	838	464	547	899	880	1318	1880	1716	708	715	993	1011	1114	1230	990	801	1062	970	1068	903	1065	767	765	873	1037	664	2190	1174	1265	581	1465	762	663
Aldh18a1	101	43	68	111	106	28	62	27	58	49	43	80	87	49	22	86	36	44	53	54	42	163	95	341	30	27	55	61	78	77	66	62	43	114	44	70	33	57	38	70	53	146	92	66	22	100	52	47
Aldh1a1	127	89	118	116	96	52	891	277	530	199	296	630	465	533	195	346	269	217	321	457	322	608	941	1007	43	73	85	189	186	127	686	586	222	592	567	630	464	560	406	497	269	863	534	455	309	745	236	389
Aldh1a7	259	164	248	148	115	64	707	313	428	145	194	365	511	586	194	274	135	175	375	448	380	358	631	662	95	162	141	173	205	90	514	619	351	369	367	369	439	560	414	329	186	538	553	622	323	443	147	246
Aldh1b1	21	25	29	117	88	36	25	12	44	39	69	65	46	31	14	101	43	62	23	27	29	143	84	90	12	22	43	72	85	59	46	25	21	174	53	76	15	24	25	89	66	180	30	25	30	95	87	66
Aldh1l1	8944	8608	10256	9031	7462	2575	9011	3383	6057	3400	4928	6104	11573	7047	3495	5224	2765	3938	6318	6378	8133	9274	10081	1859	5759	6637	9093	8676	9011	7037	5917	6993	7803	5957	5613	6266	6049	6311	6808	7552	3839	14861	8185	8405	3860	8827	3446	3853
Aldh2	12246	13681	15381	17437	17391	4853	24964	7137	16168	8758	13136	17694	19487	13455	7200	11181	6035	7418	12859	14213	17620	21934	24507	9113	8024	9663	10857	14960	14934	12435	12793	17847	13756	13283	14906	15484	11782	12481	12683	14546	9018	29686	19149	17778	10209	22618	8417	9961
Aldh3a2	4508	3540	4749	2279	2354	860	3734	1859	2080	973	1085	1684	5685	3507	1779	1762	803	1150	2292	3625	3955	2889	2618	1178	2707	3953	4301	2150	2219	2205	2395	3116	3147	2113	1702	1941	2568	2960	3211	2111	1218	3843	3488	4206	1710	2408	1225	1126
Aldh3b1	119	180	200	243	214	89	230	88	208	140	147	180	221	146	71	166	72	77	138	175	207	316	298	328	103	134	131	192	190	146	212	131	103	259	156	202	133	142	144	205	88	360	213	179	94	249	140	139
Aldh3b2	34	53	32	49	43	12	39	16	50	53	54	55	57	25	19	56	18	20	32	38	43	86	48	189	32	38	32	31	40	30	41	29	19	63	21	42	15	27	28	49	36	93	29	44	19	56	49	25
Aldh3b3	51	87	65	125	122	33	59	21	132	114	127	81	100	47	32	117	49	51	56	66	86	185	109	68	40	48	49	58	60	73	57	57	45	115	49	74	33	38	38	92	77	185	57	53	34	116	86	48
Aldh4a1	8632	9230	10435	10284	9616	3313	10382	3598	5894	2975	3933	7190	10609	6990	3526	6244	2997	4643	6089	7527	8356	9491	10188	1877	5410	6490	8077	8337	8322	7472	5802	7928	8259	5898	6752	7919	5600	5831	6112	7648	4079	14700	8579	9106	3640	9944	4219	4793
Aldh5a1	1402	1074	1492	979	1099	372	1590	641	1083	414	515	795	1811	1186	598	908	449	607	819	1227	1347	1246	1280	303	827	1078	1202	989	1034	962	949	1244	1066	1032	762	800	975	1128	1066	1110	632	2032	1283	1306	623	1198	536	501
Aldh6a1	19764	12613	18655	13079	15200	5021	18981	9176	12575	4981	7074	11181	24030	15128	7768	11345	6102	8112	9753	16838	17023	15400	17366	3390	11144	14381	16911	15000	14424	15040	12977	17844	15298	12381	12258	13515	13132	14116	15252	14863	8827	26765	18376	20556	8713	17782	6970	7305
Aldh7a1	6646	5803	7586	6218	7070	2036	8773	2962	5055	2799	3493	5632	8060	5822	2849	4123	2132	2700	4458	5853	6670	7161	8722	2382	4133	5038	5827	6308	5962	5401	4670	6419	5029	4037	4817	5172	5099	5362	5390	5563	3203	10977	7392	7429	3295	7874	2941	3504
Aldh8a1	7332	5670	7075	5337	5647	2006	6036	2631	4728	2602	3185	4346	7313	4706	2545	3645	2094	2292	3935	4953	6258	6167	5643	1230	4133	5420	6011	4716	4953	5024	3845	5317	5322	4267	4038	4149	3976	4355	4856	4333	2737	8982	5567	5978	3027	6106	2922	2741
Aldh9a1	8830	7704	9607	6664	7665	2669	10945	4282	6724	2753	3899	5825	11617	7210	3681	5091	2390	3181	6091	8114	9654	8403	8149	2525	5722	7371	8503	6263	6397	6065	6311	8400	8201	6150	5857	6758	6026	6576	6767	6198	3770	12469	9986	10141	4892	8181	3624	4260
Aldoa	11750	10961	13029	15240	15481	5308	13272	5482	12103	9926	11455	12262	15908	10777	5305	10231	5336	6650	8708	9157	12602	20829	20193	9086	6847	8342	9813	12754	13079	11895	8949	10649	9338	11768	10276	11052	7470	8618	9087	13048	7784	24480	12011	13086	6517	16099	8530	7856
Aldoart1	907	893	952	1041	1081	362	944	393	861	399	650	847	1074	738	375	762	362	465	654	603	885	1438	1336	592	474	589	677	878	934	860	637	769	659	841	706	820	582	698	699	990	580	1651	849	901	453	1121	566	539
Aldob	88270	72838	94014	100799	97024	33767	103065	44099	80680	58120	66723	86609	111644	72697	36989	76647	36293	45221	55946	73517	93141	131028	148282	36161	55032	67329	79503	100147	123528	110399	59600	98568	82364	85604	110490	88305	61040	64114	68803	98168	55345	187042	102587	117815	58262	114878	63479	72372
Aldoc	194	199	250	479	311	130	308	152	305	99	200	244	458	287	133	341	146	249	256	295	373	574	472	57	144	189	169	409	362	346	322	249	192	592	205	303	189	216	217	546	276	1001	452	469	201	448	211	145
Alg1	456	455	441	607	561	200	489	223	351	242	272	376	609	410	175	322	195	302	408	384	550	672	592	327	292	363	432	482	442	464	349	430	379	422	382	377	301	338	415	433	272	865	471	552	269	566	273	261
Alg10b	234	167	200	146	175	89	244	143	187	24	63	92	541	288	162	402	158	264	148	400	239	337	336	181	137	192	181	154	202	254	313	361	196	273	117	124	329	452	328	420	225	677	225	282	144	159	86	58
Alg11	394	220	345	260	378	126	323	164	316	215	225	253	590	360	175	344	168	212	204	360	368	473	460	279	201	263	319	306	308	371	377	364	301	378	259	270	297	292	325	393	271	711	416	425	210	460	204	207
Alg12	202	187	210	233	234	99	238	80	237	226	193	233	286	200	87	213	93	141	155	137	225	335	322	220	144	154	207	185	221	202	183	173	160	242	157	241	148	145	175	211	150	436	246	289	138	249	141	113
Alg13	109	68	83	111	123	41	114	30	106	116	81	91	114	75	46	89	45	66	61	138	111	102	159	91	68	89	91	85	97	136	91	101	68	89	80	75	82	90	92	111	88	219	109	112	60	137	65	36
Alg14	173	92	138	112	143	55	117	67	148	60	79	115	204	112	84	108	86	81	98	99	148	205	188	125	79	120	115	115	151	156	84	109	134	134	134	134	91	108	128	121	87	218	126	163	95	154	83	77
Alg2	619	470	580	617	655	259	562	288	504	367	396	434	766	541	266	481	242	307	356	480	590	789	753	479	366	486	566	595	564	541	517	560	490	637	544	526	400	447	527	549	388	1066	612	650	318	679	346	330
Alg3	267	207	261	245	251	101	223	108	202	177	146	168	312	208	108	194	85	91	144	176	270	373	243	211	165	193	224	184	217	197	161	197	177	208	163	160	140	157	157	180	114	393	246	253	137	269	148	144
Alg5	544	356	519	484	566	153	481	237	454	312	406	418	680	428	253	352	201	224	316	425	572	655	701	410	341	402	448	488	493	494	412	468	449	442	357	420	386	415	405	509	278	966	505	552	286	633	313	313
Alg6	151	91	113	114	128	49	127	64	105	90	74	114	220	104	53	110	62	81	62	129	142	156	162	139	79	118	107	134	137	149	97	125	103	115	102	117	109	100	136	146	82	234	159	148	76	151	75	55
Alg8	114	89	144	86	114	40	111	57	132	90	65	106	188	99	43	76	52	54	63	92	125	162	124	156	70	86	98	90	87	81	97	100	91	95	89	85	91	110	109	100	59	196	114	123	71	98	57	68
Alg9	410	260	398	293	394	144	378	156	256	194	215	303	424	299	151	307	138	172	240	340	336	483	471	337	226	272	323	314	308	375	248	323	292	335	268	304	185	234	304	301	229	648	360	365	180	442	221	179
Alkbh1	128	92	112	99	125	42	118	65	55	151	68	67	156	111	48	88	61	56	67	92	144	149	185	138	57	80	96	110	96	102	84	101	75	93	78	106	62	109	93	127	79	240	127	123	64	153	68	62
Alkbh2	36	60	72	53	75	26	72	24	62	81	85	31	69	52	32	36	11	26	44	46	59	102	85	90	33	36	36	59	60	41	56	50	48	47	47	45	51	42	47	51	45	108	57	61	29	78	39	29
Alkbh3	276	260	339	303	346	97	313	112	275	288	270	259	467	272	118	197	117	167	155	268	314	371	488	256	178	243	243	316	334	303	198	249	211	244	254	219	194	201	255	290	185	589	298	301	155	397	167	179
Alkbh4	70	61	64	111	89	32	80	18	63	75	66	51	99	76	37	79	52	61	61	57	99	140	118	123	38	71	68	78	89	64	86	76	68	75	71	68	58	55	64	83	62	164	77	67	44	100	57	40
Alkbh5	3033	2451	3139	2924	3206	1022	3419	1178	2165	892	1133	2107	3971	2695	1430	2681	1355	1789	1845	2635	3108	3753	3654	1732	1782	2387	2530	2669	2648	2697	2609	3298	2416	3035	2037	2510	2267	2511	2708	3254	1962	5636	2902	3474	1762	2996	1486	1301
Alkbh6	192	226	220	333	316	120	243	103	253	266	262	253	275	178	92	218	133	151	172	141	220	504	512	298	105	133	141	286	256	277	186	178	157	286	235	227	131	149	176	267	183	538	237	209	133	378	190	159
Alkbh7	212	265	316	362	369	116	251	88	265	213	221	170	272	187	118	148	92	114	201	180	264	449	342	133	146	203	211	313	311	227	180	207	207	224	205	206	142	140	189	198	179	460	246	256	124	386	175	163
Alkbh8	79	66	90	68	66	41	61	37	66	33	40	42	131	77	35	71	24	47	43	82	58	83	77	33	53	76	94	72	81	90	74	73	68	67	67	43	83	99	80	90	51	132	77	97	33	73	26	25
Alms1	210	122	175	90	111	65	247	125	143	171	135	120	259	147	100	132	51	83	103	183	189	206	202	117	69	126	119	123	97	140	110	132	82	81	99	89	103	108	154	128	112	266	193	179	101	141	69	81
Alms1-ps2	166	85	176	49	71	24	271	103	96	152	105	79	246	132	79	66	32	46	65	159	175	114	158	55	57	121	107	50	45	68	71	105	72	35	59	77	65	84	97	71	52	119	165	152	80	80	39	43
Alox12	60	55	82	160	97	35	51	35	102	154	121	79	106	56	35	65	49	48	59	69	67	150	154	45	56	54	61	99	99	102	63	45	58	93	87	79	47	77	67	98	65	182	79	86	47	130	88	59
Alpk1	20	30	35	31	40	16	41	22	59	125	60	33	63	47	18	59	20	35	33	31	55	81	78	159	13	23	19	27	27	41	54	34	22	41	33	28	34	48	39	48	49	127	53	57	21	47	30	21
Alpl	3757	4395	4652	7664	7721	3182	8490	3719	6157	5820	5678	8364	7901	5182	2847	6169	2935	3844	3939	4839	5297	11299	14342	4652	2365	2977	3171	6950	7437	6644	4311	6755	3738	5088	7354	7204	5068	5158	5154	7265	4225	14292	7276	6610	3263	9735	3682	4856
Als2	496	614	800	596	568	233	618	382	447	282	302	449	1002	665	349	626	255	417	419	570	647	899	772	486	379	479	522	433	440	529	488	705	421	580	351	418	507	587	577	578	374	1070	541	685	298	469	268	258
Als2cl	796	724	918	1027	952	332	947	305	1085	1789	1160	650	1117	640	379	729	431	507	669	737	779	1342	1351	917	429	506	584	663	861	755	738	714	614	762	601	640	534	661	640	913	548	1913	819	881	468	923	535	426
Alyref	307	311	391	432	428	133	417	142	294	192	266	285	513	345	153	287	179	199	280	361	416	597	477	699	200	281	280	353	309	306	302	312	279	380	291	349	276	289	317	387	242	867	469	449	249	519	255	236
Alyref2	48	51	61	76	71	25	59	32	63	66	76	45	73	33	24	49	27	20	47	45	61	91	98	68	46	41	39	56	52	45	44	52	51	54	32	57	49	51	44	64	39	126	73	78	36	65	37	29
Amacr	6081	5181	6530	1579	1613	553	3908	1523	1617	583	847	1174	5107	3639	1619	1026	543	643	2740	3246	4954	1755	1828	377	3867	5140	5729	1503	1517	1377	2061	2547	3754	1074	1089	1246	2154	2526	2630	1199	716	2405	2790	4108	1390	1671	679	825
Ambra1	825	759	839	968	1062	326	918	370	767	611	641	798	1032	645	367	754	416	569	529	634	784	1225	1103	844	487	604	635	847	901	891	647	751	662	855	666	800	580	561	622	990	574	1642	810	852	398	1019	539	489
Amdhd2	746	964	971	786	769	244	965	346	699	570	558	573	1103	669	396	467	217	302	639	605	817	954	932	507	546	759	908	659	606	543	546	669	503	437	402	500	494	471	584	552	349	1115	761	841	356	800	386	329
Amer1	164	97	128	117	144	40	118	67	149	143	131	97	176	118	81	136	67	80	77	119	106	230	149	154	71	124	97	120	127	98	120	120	112	156	73	103	99	127	112	144	80	289	126	145	63	200	96	71
Amfr	4071	3087	4172	4713	5113	1687	4460	1767	3435	1767	2456	3587	5759	3529	1873	3581	1813	2257	2668	3768	4143	5865	4706	2483	2425	3285	3742	4165	4190	4564	3133	4045	3491	4852	3516	4104	2983	3170	3464	4588	2854	8210	4482	4835	2187	5192	2730	2467
Amigo1	321	296	369	479	522	162	449	151	432	321	353	319	545	345	203	445	208	249	269	248	342	715	576	302	234	254	263	401	437	410	360	438	330	420	324	313	324	336	389	485	313	923	427	447	263	535	270	184
Amigo2	56	50	48	78	105	36	62	29	111	176	91	74	76	48	31	69	39	25	40	61	38	147	141	189	18	51	39	70	76	93	67	53	29	77	61	94	33	46	45	74	69	172	58	67	38	110	64	35
Amigo3	88	51	70	61	71	25	80	38	55	56	44	52	77	52	15	61	19	33	43	36	71	154	122	37	39	43	51	44	66	67	79	60	56	60	48	55	48	46	40	64	36	158	60	73	37	77	40	39
Ammecr1l	1186	853	1369	997	1394	429	1189	486	1062	745	748	901	1564	1029	552	1115	508	798	599	1049	1180	1610	1440	870	664	907	1019	1004	1014	1222	880	1138	822	1065	833	973	881	913	964	1269	799	2312	1099	1248	623	1236	648	608
Amn	2224	3333	3301	3851	3051	1031	3342	1243	2093	1981	1884	2246	3524	2188	1214	1698	911	1259	2343	2036	3420	4000	3648	1235	1884	2198	2593	2577	2449	2144	1762	2568	2272	1829	1790	2047	1633	1636	1780	1950	1159	4183	2727	2954	1305	3050	1608	1518
Amn1	104	59	87	79	117	47	82	48	70	55	100	87	123	85	39	88	49	68	58	118	117	144	150	97	65	82	97	80	85	104	70	89	81	106	83	89	59	75	70	107	66	207	117	115	50	110	82	62
Amot	551	419	601	424	537	175	511	251	491	205	249	312	801	563	337	559	235	322	298	612	572	636	527	572	322	453	403	577	454	508	498	606	449	560	397	366	530	608	613	622	393	1082	575	637	315	625	334	231
Amotl1	260	284	303	432	522	173	340	150	350	622	480	302	528	391	183	600	313	355	267	384	353	815	680	712	147	206	200	330	365	479	261	279	136	446	322	329	302	347	317	526	333	1016	343	478	177	493	265	216
Amotl2	1564	2087	2354	2311	2810	725	2217	933	2291	2138	2062	1610	2447	1567	907	1549	920	1121	1513	1673	2572	2806	2973	2602	940	1283	1373	1888	2648	2046	1929	2056	1458	2005	1894	2090	1372	1565	1723	1741	1211	4096	2264	2629	1212	2619	1238	1477
Ampd2	592	591	708	816	807	295	641	282	658	764	656	507	824	455	248	501	298	339	495	490	599	909	816	686	391	511	542	670	641	655	479	544	497	715	469	471	453	510	463	568	382	1137	556	659	349	803	454	344
Ampd3	328	282	367	518	543	214	457	192	339	395	384	368	623	426	212	651	315	381	314	423	379	827	705	393	199	240	295	448	464	524	472	386	253	575	373	444	324	425	419	735	510	1370	360	534	248	468	322	197
Amt	1371	1007	1126	1490	1477	523	1630	583	942	316	543	1113	1611	1045	553	1050	545	669	805	946	1321	1613	1410	517	690	802	952	1235	1248	1143	912	1217	1134	1134	1021	1223	924	931	1063	1295	765	2203	1252	1234	632	1444	696	644
Amy1	99	59	81	123	144	34	105	32	160	325	244	107	159	64	40	100	59	68	72	92	87	147	193	74	71	63	70	171	145	127	81	63	70	131	67	93	61	84	65	190	107	365	151	136	81	244	113	91
Amz1	47	47	60	61	46	19	73	20	57	96	37	48	67	62	20	37	20	18	39	66	52	67	80	174	40	62	63	42	51	42	56	70	44	39	48	51	37	55	43	48	25	73	83	66	26	59	32	26
Amz2	502	369	588	529	641	202	600	304	467	279	364	379	763	493	233	509	249	282	303	462	490	824	633	497	321	412	512	548	535	561	395	463	435	485	403	501	407	389	449	575	341	1037	546	551	274	618	296	249
Anapc1	850	643	960	894	908	343	863	425	769	507	587	569	1266	867	461	971	418	611	571	953	865	1218	1008	848	512	703	743	771	816	901	865	875	627	847	625	673	674	837	834	1053	661	1769	831	941	432	934	472	369
Anapc10	58	55	63	73	92	39	82	50	83	49	72	91	110	66	28	79	33	34	46	73	79	144	140	98	47	59	68	100	87	111	47	79	62	103	65	63	56	66	74	100	84	174	103	90	59	88	56	50
Anapc11	318	371	393	580	494	185	499	145	454	444	493	437	500	336	169	335	171	218	309	301	386	708	690	543	201	270	265	443	428	415	286	374	297	351	383	355	246	294	282	409	291	846	469	481	249	632	291	324
Anapc13	893	1127	1081	1017	1133	312	1125	379	986	1119	1109	813	1073	606	400	653	306	372	673	617	855	1435	1407	600	566	619	701	727	704	633	516	541	607	633	551	655	557	585	553	799	543	1741	1059	1057	494	1194	694	672
Anapc15	156	105	122	134	139	65	167	56	137	135	166	104	195	95	60	103	52	74	79	111	134	191	208	213	86	84	111	160	131	142	104	93	100	90	79	92	71	92	84	120	92	219	113	140	64	181	107	113
Anapc16	662	622	810	582	641	181	719	273	586	441	460	426	835	503	289	436	215	286	491	513	727	847	685	550	448	566	625	532	509	522	452	562	531	467	410	429	437	451	513	517	381	1150	682	783	398	690	360	291
Anapc2	1124	1028	1223	1581	1424	528	1274	467	1049	903	975	1060	1553	1011	532	1002	491	598	841	905	1156	1750	1630	1532	679	898	933	1216	1221	1132	892	1092	820	1049	924	984	849	822	897	1249	717	2306	1175	1296	627	1515	733	637
Anapc4	603	399	595	575	624	187	558	231	504	501	409	449	734	440	236	463	250	318	289	441	545	811	720	572	322	407	465	619	592	583	468	502	424	534	457	472	453	467	490	615	326	1032	567	610	276	700	342	317
Anapc5	3104	2465	2655	3232	3273	1098	3125	1432	2690	2208	2244	2595	3851	2526	1185	2553	1324	1636	1781	2126	3057	4093	4067	3096	1626	2078	2330	2784	2769	2887	1960	2471	2108	2797	2304	2556	1923	1988	2289	2737	1751	5574	2887	2787	1333	3389	1661	1541
Anapc7	859	885	996	803	837	320	1019	378	603	423	536	557	1134	784	389	550	293	356	577	635	957	1037	1036	662	519	655	767	771	684	676	670	808	637	606	560	614	603	657	676	714	486	1351	857	870	428	823	395	377
Angel1	181	101	136	235	196	83	168	51	159	108	78	132	203	129	66	153	68	100	95	96	160	208	191	114	81	134	119	155	174	160	123	162	132	155	127	157	102	115	121	177	101	303	158	148	86	198	97	87
Angel2	744	483	704	642	778	275	733	304	600	633	494	555	954	553	314	622	334	374	460	602	697	906	1033	565	392	505	557	671	617	674	532	590	508	639	514	609	487	558	590	696	459	1346	726	737	364	870	442	313
Angpt1	226	140	204	232	271	92	168	86	222	215	133	163	208	188	63	209	106	147	94	168	139	362	288	76	114	129	137	265	268	309	111	181	117	200	203	169	169	200	164	232	163	462	234	223	68	233	114	107
Angpt2	215	216	237	457	394	112	234	107	254	403	357	122	316	197	110	271	160	195	184	189	323	502	290	137	129	137	144	293	335	300	166	100	51	306	83	128	150	151	189	382	262	764	331	272	107	289	184	54
Angptl2	472	507	585	1110	1068	405	808	330	811	842	876	781	886	475	292	886	352	539	416	459	589	1363	1274	787	278	399	353	762	871	915	374	538	301	1027	735	895	474	467	497	622	486	1595	796	715	267	1141	764	561
Angptl3	73	26	86	250	337	120	112	48	794	897	970	978	84	50	33	519	302	316	48	64	49	1253	1011	33	34	30	40	380	399	314	53	97	53	911	771	912	61	61	78	594	375	1099	97	78	48	1275	550	488
Angptl4	633	752	1161	289	516	264	2063	702	702	982	962	1125	1242	883	496	941	555	497	270	738	1103	1351	1824	663	126	269	443	140	458	689	544	946	180	503	463	780	292	797	632	653	494	1906	918	1138	768	371	282	467
Ank	145	161	184	301	359	100	177	89	214	223	207	239	283	144	70	270	137	168	114	148	166	408	286	478	75	114	104	219	248	247	110	97	72	337	186	200	124	128	145	254	182	466	174	176	70	279	150	97
Ank2	117	96	177	184	209	71	114	67	126	81	108	123	189	124	70	203	94	145	75	121	99	317	239	33	62	70	92	142	179	173	149	103	90	200	90	106	101	93	110	229	118	360	147	154	108	198	80	73
Ank3	3561	2605	3780	2873	3610	1257	3191	1738	2677	2211	2010	2282	4655	3207	1472	3155	1367	1997	1798	2776	2781	4813	4770	1135	1827	2326	2636	2655	2925	2862	2116	2798	2424	3019	2093	2625	2215	2485	2582	3733	2096	5874	3171	3898	1514	3386	1615	1634
Ankdd1b	59	29	59	52	46	21	46	23	32	19	50	34	50	24	12	37	19	33	31	26	43	52	61	57	18	33	31	53	49	41	30	36	30	35	35	47	28	37	27	49	38	79	49	41	25	40	26	22
Ankfy1	865	653	774	773	825	308	811	437	678	452	494	516	1316	890	474	1020	465	654	461	903	723	1262	1099	1003	400	594	620	725	752	865	960	825	540	826	541	621	640	773	869	1051	593	1752	778	899	378	833	410	327
Ankhd1	887	777	1022	946	1180	387	1067	507	1216	1394	1051	772	1529	910	500	1194	517	720	583	1126	1036	1677	1602	1034	520	706	762	954	917	954	874	960	699	860	705	786	746	848	915	1236	770	2250	921	1048	539	1144	609	505
Ankib1	2172	1610	2014	1528	1745	636	1815	1091	1315	757	708	939	2960	1771	1048	1586	732	927	1185	2277	2062	1975	1596	739	1290	1769	1916	1569	1615	1960	1575	2064	1781	1573	1016	1174	1747	1822	1762	1734	1076	2908	1832	2209	850	1532	846	692
Ankle2	636	450	596	569	669	238	612	374	573	346	395	420	877	499	264	570	263	329	391	543	568	759	788	628	336	477	435	509	509	559	505	547	409	519	400	421	462	540	529	647	452	1080	587	624	289	539	301	228
Ankmy2	655	411	562	552	715	229	583	193	462	342	369	432	645	428	236	444	223	260	325	407	562	738	739	378	330	440	456	591	540	558	425	441	385	499	404	414	387	344	451	616	384	992	575	605	277	645	318	303
Ankra2	298	146	242	228	282	90	252	102	235	290	223	195	320	190	105	206	95	116	151	189	247	324	369	250	152	203	178	255	211	224	196	211	187	223	189	208	154	166	191	229	176	500	285	288	131	352	137	156
Ankrd10	524	485	519	754	823	256	573	203	650	917	696	474	713	398	200	448	245	329	357	543	560	945	1000	651	323	417	421	640	610	595	500	501	419	538	435	462	374	446	446	700	412	1324	624	620	342	857	444	369
Ankrd11	1423	1233	1497	1476	1723	576	1365	749	1668	2577	1802	1251	2288	1327	751	1492	753	859	1158	1356	1617	2544	2458	2420	589	844	1035	1162	1187	1227	1245	1361	834	1266	916	1040	785	1045	984	1217	728	2353	1027	1135	547	1190	618	512
Ankrd12	761	536	863	759	1234	351	828	445	1141	2293	1495	770	1236	766	360	965	468	627	515	898	885	1776	1767	1531	400	621	557	824	723	875	745	677	519	875	674	843	521	581	665	1105	743	2013	996	1139	552	1299	679	565
Ankrd13a	1101	908	1176	1191	1338	434	961	493	908	698	805	952	1537	962	489	967	528	613	812	877	1048	1656	1337	1581	642	816	948	1018	1191	1128	899	1030	859	1136	912	992	736	834	953	1238	731	2281	1065	1235	568	1277	695	557
Ankrd13b	377	361	318	418	505	156	407	129	375	550	413	387	430	250	152	300	173	188	234	269	262	635	574	381	241	274	277	400	382	338	264	355	305	381	343	344	234	250	278	357	204	720	333	331	186	652	300	243
Ankrd13c	3685	2420	3413	2192	2616	873	2961	1347	1800	525	862	1620	4049	2408	1214	1918	929	1221	1659	2632	2791	2489	2261	784	2032	2669	2991	2410	2547	2518	1919	2888	2566	2100	1834	2127	2073	2227	2472	2217	1331	4008	2836	3317	1362	2400	1167	1145
Ankrd13d	18	14	31	44	54	12	44	20	32	60	51	32	36	45	15	38	18	30	26	24	23	64	70	133	13	20	20	26	25	35	33	32	19	53	22	26	19	18	19	36	32	82	28	26	19	39	34	17
Ankrd16	309	291	311	401	501	137	402	153	457	550	360	284	465	245	142	282	128	169	237	269	296	496	541	264	189	255	286	365	331	298	272	305	242	296	279	279	262	302	276	362	242	712	315	349	183	485	240	170
Ankrd17	1340	828	1421	1121	1485	518	1264	734	1236	1323	1190	968	1893	1388	730	1398	689	916	753	1355	1332	1885	1869	1252	712	984	1072	1159	1240	1427	1168	1325	954	1235	879	1059	988	1111	1223	1524	943	2750	1159	1534	764	1521	815	680
Ankrd23	41	69	65	125	114	49	72	39	134	213	187	98	107	55	25	63	38	55	68	42	85	154	157	143	49	46	58	108	100	103	69	77	55	85	74	95	53	55	47	100	63	215	83	75	59	145	82	80
Ankrd24	338	371	490	796	741	263	543	158	641	1236	919	571	487	328	188	533	283	334	301	351	453	1100	1145	253	233	284	307	526	562	526	326	392	275	543	422	570	312	326	337	725	370	1375	519	432	270	841	426	372
Ankrd26	84	86	146	82	139	29	84	79	146	103	84	66	209	127	57	130	59	90	79	178	162	215	149	108	58	89	94	97	94	95	81	109	60	81	73	55	93	109	114	111	85	240	89	118	46	91	50	42
Ankrd27	403	406	476	539	494	166	483	165	421	487	369	355	586	376	214	407	208	255	281	390	470	676	623	572	263	323	340	423	421	457	411	446	326	431	369	333	306	320	355	493	259	835	436	456	224	510	256	253
Ankrd28	615	372	569	485	524	177	545	262	489	244	213	366	797	560	290	624	239	396	335	619	498	714	629	285	346	461	434	477	530	528	554	624	437	602	399	407	511	613	574	684	435	1246	549	597	269	571	241	210
Ankrd29	356	229	314	138	175	59	332	166	147	154	132	110	406	237	118	128	68	81	175	250	307	231	171	190	174	263	281	132	141	147	217	295	291	143	79	115	187	201	259	103	68	259	285	327	164	130	81	68
Ankrd32	178	115	149	153	247	67	123	69	148	91	108	126	219	146	51	173	54	124	100	168	147	175	220	78	84	163	128	153	169	178	161	157	137	167	119	153	126	123	152	218	113	336	185	176	74	219	85	62
Ankrd33b	1500	1096	1367	936	878	425	1234	639	1092	568	679	701	1918	1164	611	860	391	613	879	1461	1351	1452	1369	614	737	1002	948	894	998	913	1092	1298	1116	946	786	726	998	1055	1062	988	554	1767	1321	1654	625	1066	525	509
Ankrd39	57	87	62	155	113	43	81	39	104	65	90	80	147	80	44	85	54	64	83	78	96	169	163	94	39	51	70	117	104	106	90	80	63	119	85	75	58	70	72	131	57	220	83	88	50	123	51	50
Ankrd40	1426	979	1387	1755	1868	557	1437	579	1232	1095	1156	1329	1739	1106	641	1321	744	807	916	1179	1371	2427	1988	1024	778	995	1107	1500	1533	1536	986	1087	970	1559	1197	1458	999	1053	1138	1543	1038	2968	1478	1516	708	1956	992	892
Ankrd42	198	120	131	97	118	24	67	33	95	81	61	67	170	118	50	79	50	49	56	101	128	152	122	64	72	117	130	83	97	96	40	76	67	71	66	63	79	62	100	77	50	195	96	107	61	105	43	36
Ankrd44	272	147	280	222	256	88	287	147	224	193	211	159	459	265	158	273	153	196	187	270	287	376	284	559	148	189	161	189	203	251	294	236	173	244	147	177	205	266	250	272	198	528	286	332	153	242	129	120
Ankrd46	884	724	949	1121	1227	397	995	439	924	530	626	848	1358	893	465	920	472	570	585	921	1079	1489	1297	901	644	856	885	1039	1064	1147	770	1041	887	1000	858	987	708	748	863	1118	730	2196	1017	1186	632	1341	598	580
Ankrd49	153	63	127	119	172	31	136	64	128	104	68	107	202	96	68	93	51	65	64	94	135	148	163	148	73	103	123	133	106	116	105	117	89	103	101	98	86	91	109	125	88	236	129	135	80	157	84	49
Ankrd50	247	154	192	258	265	82	188	71	193	125	200	129	239	114	85	207	87	119	131	121	143	298	194	236	87	118	132	211	187	201	145	152	90	233	166	140	145	141	158	209	141	383	214	213	83	293	147	87
Ankrd52	678	573	767	696	780	282	813	330	624	247	315	427	984	690	399	848	410	484	379	603	630	1023	872	628	374	438	397	459	554	683	684	803	460	791	409	484	520	659	642	831	443	1390	513	669	305	552	266	228
Ankrd54	304	276	336	456	399	150	334	143	314	340	347	314	481	269	141	291	162	218	270	252	419	602	568	314	177	238	275	387	375	326	237	288	254	323	269	327	202	180	257	361	249	767	347	366	224	469	226	202
Ankrd9	75	127	157	182	142	55	124	64	89	74	91	111	195	102	54	131	53	82	121	109	124	220	189	58	81	82	139	126	136	92	100	79	73	99	94	105	67	66	76	133	92	263	131	190	83	145	81	74
Anks1	788	824	884	1284	1188	419	954	467	903	903	833	884	1211	842	427	901	444	693	633	698	1037	1630	1442	626	515	634	701	942	1095	985	800	855	679	1230	742	896	633	644	698	1182	685	2168	920	1022	447	1124	633	458
Anks3	480	577	608	768	808	274	646	241	601	798	605	559	788	550	288	566	266	357	477	564	688	1038	1014	565	373	491	491	652	666	692	471	559	441	580	510	536	404	427	476	647	406	1282	667	661	392	737	439	388
Anks4b	639	506	722	607	687	239	783	311	607	299	313	434	892	664	299	499	258	349	307	566	696	922	724	416	402	532	569	766	663	722	498	661	559	558	584	509	494	496	552	599	384	1014	609	696	362	607	300	350
Anks6	273	322	390	563	462	171	441	130	359	408	328	302	432	241	150	323	191	241	222	255	360	528	520	203	182	238	257	360	350	280	242	253	213	439	276	356	211	257	243	352	223	746	296	324	161	455	231	200
[truncated: 11,134 more rows]

## Sheet: norm by dseq2
SampleID	M2_M_SPF_1	M2_M_SPF_2	M2_M_SPF_3	M2_F_SPF_1	M2_F_SPF_2	M2_F_SPF_3	M24_M_SPF_1	M24_M_SPF_2	M24_M_SPF_3	M24_F_SPF_1	M24_F_SPF_2	M24_F_SPF_3	M12_M_SPF_1	M12_M_SPF_2	M12_M_SPF_3	M12_F_SPF_1	M12_F_SPF_2	M12_F_SPF_3	M19_M_SPF_1	M19_M_SPF_2	M19_M_SPF_3	M19_F_SPF_1	M19_F_SPF_2	M19_F_SPF_3	M2_M_GF_1	M2_M_GF_2	M2_M_GF_3	M2_F_GF_1	M2_F_GF_2	M2_F_GF_3	M24_M_GF_1	M24_M_GF_2	M24_M_GF_3	M24_F_GF_1	M24_F_GF_2	M24_F_GF_3	M12_M_GF_1	M12_M_GF_2	M12_M_GF_3	M12_F_GF_1	M12_F_GF_2	M12_F_GF_3	M19_M_GF_1	M19_M_GF_2	M19_M_GF_3	M19_F_GF_1	M19_F_GF_2	M19_F_GF_3
[truncated: 11,652 more rows]
